# Supplementary material for: Homology sensing via non-linear amplification of sequence-dependent pausing by RecQ helicase
Source: eLife. 2019 Aug 29;8:e45909. doi: 10.7554/eLife.45909 (PMC6773442; doi:10.7554/eLife.45909)
Supplement: Figure 1—source data 1. [file elife-45909-fig1-data1.xlsx]

## Sheet: FIgure1-source data1
RecQwt_Fig1b	RecQdH_Fig1b
-2.32225	-7.45319
1.42775	5.04681
5.17775	5.04681
0.177745	5.04681
-4.82225	-4.95319
-1.07225	2.54681
3.92775	3.79681
0.177745	18.7968
1.42775	6.29681
0.177745	6.29681
7.67775	-1.20319
1.42775	2.54681
0.177745	10.0468
5.17775	3.79681
5.17775	10.0468
-2.32225	10.0468
-1.07225	5.04681
1.42775	2.54681
5.17775	-2.45319
1.42775	6.29681
-3.57225	1.29681
0.177745	-6.20319
0.177745	10.0468
2.67775	-2.45319
5.17775	16.2968
3.92775	10.0468
-4.82225	-1.20319
1.42775	1.29681
-1.07225	1.29681
-2.32225	8.79681
-2.32225	7.54681
6.42775	1.29681
0.177745	-3.70319
0.177745	6.29681
3.92775	10.0468
2.67775	5.04681
2.67775	7.54681
0.177745	5.04681
6.42775	7.54681
3.92775	1.29681
0.177745	5.04681
2.67775	13.7968
-3.57225	5.04681
5.17775	0.0468139
-2.32225	5.04681
1.42775	3.79681
3.92775	3.79681
-2.32225	3.79681
1.42775	7.54681
-4.82225	2.54681
0.177745	18.7968
1.42775	13.7968
5.17775	6.29681
-1.07225	12.5468
1.42775	8.79681
6.42775	11.2968
6.42775	12.5468
5.17775	12.5468
3.92775	5.04681
2.67775	2.54681
1.42775	10.0468
1.42775	7.54681
7.67775	16.2968
6.42775	8.79681
1.42775	8.79681
5.17775	17.5468
5.17775	17.5468
3.92775	8.79681
1.42775	8.79681
-6.07225	22.5468
0.177745	17.5468
-4.82225	18.7968
-2.32225	21.2968
3.92775	18.7968
0.177745	21.2968
-2.32225	16.2968
2.67775	23.7968
-2.32225	27.5468
0.177745	18.7968
-1.07225	18.7968
-2.32225	25.0468
1.42775	27.5468
-1.07225	40.0468
2.67775	30.0468
2.67775	32.5468
5.17775	38.7968
-6.07225	25.0468
2.67775	38.7968
-1.07225	43.7968
-1.07225	31.2968
2.67775	31.2968
3.92775	26.2968
-3.57225	32.5468
-1.07225	35.0468
0.177745	40.0468
2.67775	46.2968
7.67775	43.7968
3.92775	53.7968
-4.82225	52.5468
3.92775	53.7968
2.67775	62.5468
5.17775	53.7968
5.17775	65.0468
0.177745	53.7968
11.4277	45.0468
10.1777	75.0468
6.42775	65.0468
12.6777	66.2968
6.42775	63.7968
5.17775	70.0468
16.4277	72.5468
7.67775	66.2968
3.92775	77.5468
12.6777	68.7968
10.1777	71.2968
15.1777	86.2968
7.67775	71.2968
8.92775	72.5468
15.1777	70.0468
21.4277	65.0468
11.4277	65.0468
18.9277	72.5468
15.1777	83.7968
17.6777	90.0468
16.4277	92.5468
16.4277	88.7968
17.6777	88.7968
13.9277	93.7968
18.9277	92.5468
18.9277	87.5468
17.6777	82.5468
21.4277	85.0468
21.4277	75.0468
23.9277	90.0468
22.6777	88.7968
23.9277	85.0468
23.9277	90.0468
20.1777	87.5468
23.9277	96.2968
21.4277	98.7968
30.1777	90.0468
30.1777	83.7968
23.9277	85.0468
32.6777	86.2968
30.1777	81.2968
25.1777	82.5468
16.4277	95.0468
23.9277	88.7968
20.1777	86.2968
23.9277	85.0468
20.1777	86.2968
32.6777	98.7968
26.4277	91.2968
22.6777	86.2968
18.9277	95.0468
18.9277	88.7968
25.1777	100.047
21.4277	83.7968
25.1777	86.2968
15.1777	78.7968
21.4277	91.2968
25.1777	85.0468
18.9277	93.7968
20.1777	92.5468
18.9277	85.0468
11.4277	88.7968
12.6777	81.2968
20.1777	90.0468
13.9277	91.2968
13.9277	93.7968
10.1777	97.5468
13.9277	96.2968
12.6777	102.547
16.4277	96.2968
15.1777	106.297
11.4277	100.047
13.9277	83.7968
16.4277	90.0468
20.1777	97.5468
15.1777	96.2968
13.9277	101.297
10.1777	103.797
13.9277	100.047
20.1777	101.297
13.9277	108.797
22.6777	102.547
22.6777	100.047
20.1777	105.047
17.6777	112.547
26.4277	117.547
25.1777	106.297
12.6777	108.797
17.6777	103.797
21.4277	105.047
15.1777	108.797
23.9277	106.297
21.4277	112.547
23.9277	113.797
23.9277	110.047
26.4277	117.547
18.9277	100.047
20.1777	105.047
21.4277	108.797
21.4277	105.047
26.4277	100.047
28.9277	116.297
23.9277	111.297
16.4277	98.7968
15.1777	123.797
27.6777	108.797
23.9277	121.297
20.1777	111.297
28.9277	118.797
28.9277	117.547
32.6777	121.297
26.4277	122.547
28.9277	115.047
28.9277	120.047
20.1777	116.297
18.9277	130.047
20.1777	132.547
21.4277	120.047
22.6777	132.547
23.9277	133.797
28.9277	145.047
30.1777	137.547
25.1777	137.547
22.6777	146.297
22.6777	140.047
26.4277	145.047
22.6777	150.047
21.4277	142.547
22.6777	148.797
20.1777	151.297
30.1777	157.547
17.6777	150.047
25.1777	142.547
27.6777	158.797
30.1777	148.797
30.1777	155.047
22.6777	153.797
22.6777	147.547
15.1777	151.297
15.1777	163.797
8.92775	171.297
12.6777	145.047
8.92775	155.047
2.67775	151.297
7.67775	155.047
0.177745	143.797
2.67775	156.297
2.67775	161.297
3.92775	167.547
-1.07225	163.797
0.177745	158.797
0.177745	158.797
-6.07225	157.547
2.67775	165.047
3.92775	165.047
3.92775	166.297
3.92775	163.797
-1.07225	177.547
1.42775	173.797
1.42775	160.047
6.42775	163.797
5.17775	157.547
10.1777	168.797
7.67775	155.047
3.92775	167.547
6.42775	167.547
3.92775	135.047
3.92775	10.0468
12.6777	-1.20319
8.92775	-6.20319
3.92775	-2.45319
5.17775	5.04681
5.17775	7.54681
0.177745	8.79681
6.42775	1.29681
1.42775	3.79681
5.17775	2.54681
6.42775	6.29681
3.92775	1.29681
3.92775	5.04681
7.67775	6.29681
5.17775	1.29681
11.4277	7.54681
13.9277	10.0468
13.9277	3.79681
11.4277	3.79681
18.9277	5.04681
15.1777	-4.95319
20.1777	5.04681
18.9277	-4.95319
16.4277
18.9277
25.1777
28.9277
26.4277
25.1777
16.4277
25.1777
23.9277
25.1777
26.4277
21.4277
26.4277
25.1777
25.1777
26.4277
23.9277
21.4277
26.4277
31.4277
27.6777
27.6777
30.1777
23.9277
25.1777
26.4277
28.9277
22.6777
25.1777
22.6777
18.9277
28.9277
22.6777
26.4277
30.1777
21.4277
27.6777
27.6777
30.1777
26.4277
33.9277
31.4277
33.9277
23.9277
20.1777
22.6777
21.4277
21.4277
17.6777
27.6777
20.1777
18.9277
23.9277
26.4277
25.1777
20.1777
12.6777
13.9277
3.92775
8.92775
8.92775
16.4277
10.1777
10.1777
16.4277
15.1777
18.9277
12.6777
18.9277
13.9277
17.6777
16.4277
13.9277
13.9277
15.1777
7.67775
12.6777
20.1777
17.6777
16.4277
7.67775
12.6777
20.1777
10.1777
20.1777
18.9277
21.4277
17.6777
25.1777
23.9277
23.9277
31.4277
22.6777
23.9277
22.6777
20.1777
23.9277
31.4277
25.1777
23.9277
17.6777
23.9277
21.4277
25.1777
26.4277
25.1777
25.1777
21.4277
16.4277
13.9277
16.4277
10.1777
13.9277
12.6777
21.4277
20.1777
13.9277
17.6777
18.9277
17.6777
23.9277
17.6777
23.9277
25.1777
20.1777
27.6777
26.4277
17.6777
22.6777
25.1777
26.4277
23.9277
18.9277
31.4277
21.4277
28.9277
22.6777
25.1777
22.6777
27.6777
30.1777
27.6777
17.6777
26.4277
18.9277
25.1777
23.9277
23.9277
22.6777
18.9277
17.6777
23.9277
18.9277
22.6777
20.1777
21.4277
28.9277
30.1777
27.6777
23.9277
25.1777
35.1777
32.6777
30.1777
28.9277
28.9277
28.9277
30.1777
30.1777
25.1777
22.6777
23.9277
35.1777
22.6777
18.9277
22.6777
30.1777
22.6777
23.9277
25.1777
30.1777
21.4277
22.6777
21.4277
23.9277
28.9277
26.4277
22.6777
25.1777
21.4277
32.6777
25.1777
33.9277
27.6777
26.4277
6.42775
3.92775
2.67775
-4.82225
3.92775
0.177745
0.177745
-3.57225
-4.82225
0.177745
7.67775
1.42775
1.42775
2.67775
8.92775
11.4277
6.42775
6.42775
8.92775
8.92775
8.92775
6.42775
6.42775
6.42775
13.9277
6.42775
17.6777
12.6777
16.4277
16.4277
12.6777
3.92775
5.17775
8.92775
6.42775
3.92775
7.67775
10.1777
7.67775
8.92775
3.92775
10.1777
1.42775
3.92775
11.4277
11.4277
12.6777
16.4277
12.6777
10.1777
6.42775
3.92775
5.17775
3.92775
11.4277
6.42775
3.92775
6.42775
6.42775
-2.32225
0.177745
3.92775
5.17775
2.67775
6.42775
1.42775
0.177745
3.92775
2.67775
1.42775
3.92775
-7.32225
-7.32225
6.42775
1.42775
3.92775
2.67775
6.42775
7.67775
5.17775
3.92775
-1.07225
11.4277
8.92775
1.42775
7.67775
11.4277
5.17775
15.1777
13.9277
13.9277
12.6777
12.6777
7.67775
8.92775
8.92775
16.4277
10.1777
13.9277
12.6777
15.1777
11.4277
17.6777
16.4277
17.6777
20.1777
22.6777
12.6777
13.9277
11.4277
7.67775
11.4277
15.1777
12.6777
-3.57225
2.67775
1.42775
10.1777
6.42775
5.17775
2.67775
1.42775
6.42775
12.6777
15.1777
15.1777
13.9277
13.9277
10.1777
18.9277
11.4277
13.9277
20.1777
7.67775
15.1777
13.9277
21.4277
11.4277
21.4277
16.4277
18.9277
15.1777
13.9277
11.4277
12.6777
17.6777
17.6777
17.6777
21.4277
23.9277
23.9277
31.4277
21.4277
17.6777
13.9277
16.4277
17.6777
21.4277
13.9277
11.4277
18.9277
23.9277
25.1777
26.4277
21.4277
25.1777
23.9277
22.6777
20.1777
22.6777
28.9277
27.6777
12.6777
21.4277
22.6777
26.4277
22.6777
23.9277
17.6777
17.6777
18.9277
15.1777
20.1777
18.9277
25.1777
27.6777
13.9277
22.6777
23.9277
23.9277
20.1777
18.9277
21.4277
21.4277
13.9277
27.6777
23.9277
28.9277
33.9277
26.4277
36.4277
25.1777
23.9277
21.4277
27.6777
20.1777
22.6777
21.4277
26.4277
25.1777
15.1777
21.4277
22.6777
26.4277
21.4277
16.4277
20.1777
22.6777
22.6777
25.1777
23.9277
28.9277
25.1777
26.4277
23.9277
11.4277
21.4277
20.1777
17.6777
18.9277
22.6777
22.6777
21.4277
30.1777
26.4277
26.4277
25.1777
21.4277
20.1777
17.6777
18.9277
17.6777
22.6777
22.6777
13.9277
16.4277
13.9277
15.1777
13.9277
8.92775
5.17775
5.17775
8.92775
2.67775
5.17775
8.92775
7.67775
13.9277
16.4277
13.9277
13.9277
10.1777
12.6777
13.9277
16.4277
13.9277
15.1777
20.1777
12.6777
11.4277
21.4277
15.1777
18.9277
22.6777
18.9277
20.1777
17.6777
21.4277
26.4277
22.6777
26.4277
30.1777
27.6777
23.9277
27.6777
27.6777
27.6777
17.6777
21.4277
22.6777
21.4277
18.9277
23.9277
18.9277
23.9277
22.6777
23.9277
13.9277
23.9277
17.6777
25.1777
25.1777
18.9277
25.1777
30.1777
28.9277
28.9277
27.6777
31.4277
26.4277
21.4277
32.6777
25.1777
26.4277
23.9277
22.6777
20.1777
25.1777
25.1777
32.6777
28.9277
23.9277
30.1777
32.6777
26.4277
27.6777
28.9277
31.4277
27.6777
17.6777
22.6777
23.9277
22.6777
17.6777
22.6777
22.6777
11.4277
13.9277
10.1777
11.4277
13.9277
21.4277
22.6777
21.4277
18.9277
17.6777
18.9277
13.9277
12.6777
6.42775
2.67775
7.67775
8.92775
3.92775
-1.07225
2.67775
1.42775
6.42775
7.67775
11.4277
5.17775
6.42775
11.4277
8.92775
12.6777
7.67775
16.4277
12.6777
15.1777
16.4277
20.1777
17.6777
20.1777
22.6777
21.4277
25.1777
27.6777
31.4277
23.9277
31.4277
27.6777
25.1777
21.4277
20.1777
27.6777
23.9277
26.4277
27.6777
26.4277
30.1777
22.6777
13.9277
27.6777
25.1777
22.6777
33.9277
28.9277
31.4277
35.1777
23.9277
31.4277
30.1777
30.1777
26.4277
30.1777
27.6777
31.4277
22.6777
30.1777
22.6777
25.1777
23.9277
8.92775
17.6777
17.6777
20.1777
20.1777
10.1777
20.1777
13.9277
18.9277
25.1777
22.6777
25.1777
27.6777
27.6777
26.4277
20.1777
27.6777
25.1777
30.1777
23.9277
27.6777
27.6777
31.4277
26.4277
25.1777
23.9277
27.6777
27.6777
20.1777
23.9277
22.6777
28.9277
26.4277
30.1777
32.6777
23.9277
33.9277
22.6777
23.9277
28.9277
31.4277
21.4277
27.6777
23.9277
26.4277
18.9277
18.9277
20.1777
27.6777
18.9277
22.6777
21.4277
20.1777
18.9277
22.6777
23.9277
26.4277
16.4277
22.6777
18.9277
23.9277
17.6777
13.9277
15.1777
13.9277
13.9277
17.6777
22.6777
20.1777
17.6777
26.4277
12.6777
16.4277
18.9277
16.4277
22.6777
25.1777
28.9277
26.4277
26.4277
28.9277
27.6777
31.4277
25.1777
31.4277
32.6777
33.9277
30.1777
22.6777
32.6777
23.9277
23.9277
26.4277
31.4277
31.4277
21.4277
32.6777
28.9277
31.4277
40.1777
25.1777
23.9277
31.4277
33.9277
33.9277
28.9277
23.9277
20.1777
17.6777
16.4277
23.9277
18.9277
22.6777
23.9277
25.1777
20.1777
22.6777
26.4277
30.1777
33.9277
21.4277
22.6777
21.4277
20.1777
22.6777
26.4277
27.6777
20.1777
21.4277
18.9277
22.6777
25.1777
23.9277
26.4277
22.6777
30.1777
16.4277
17.6777
17.6777
15.1777
15.1777
17.6777
16.4277
15.1777
15.1777
16.4277
21.4277
20.1777
21.4277
17.6777
22.6777
23.9277
23.9277
26.4277
22.6777
21.4277
26.4277
27.6777
22.6777
27.6777
23.9277
17.6777
21.4277
23.9277
15.1777
23.9277
15.1777
10.1777
10.1777
15.1777
15.1777
16.4277
10.1777
17.6777
12.6777
21.4277
20.1777
32.6777
25.1777
22.6777
23.9277
35.1777
25.1777
17.6777
22.6777
20.1777
27.6777
27.6777
26.4277
30.1777
32.6777
27.6777
28.9277
20.1777
28.9277
27.6777
26.4277
33.9277
33.9277
32.6777
27.6777
40.1777
33.9277
36.4277
42.6777
41.4277
42.6777
37.6777
37.6777
43.9277
43.9277
43.9277
41.4277
46.4277
47.6777
42.6777
46.4277
46.4277
41.4277
41.4277
38.9277
46.4277
37.6777
46.4277
47.6777
33.9277
37.6777
32.6777
41.4277
35.1777
40.1777
40.1777
37.6777
38.9277
37.6777
31.4277
33.9277
38.9277
33.9277
31.4277
41.4277
35.1777
35.1777
42.6777
40.1777
38.9277
43.9277
37.6777
43.9277
40.1777
33.9277
41.4277
26.4277
30.1777
32.6777
32.6777
36.4277
35.1777
32.6777
32.6777
30.1777
26.4277
23.9277
28.9277
30.1777
26.4277
30.1777
32.6777
37.6777
33.9277
23.9277
27.6777
27.6777
30.1777
26.4277
17.6777
23.9277
22.6777
22.6777
23.9277
17.6777
23.9277
17.6777
27.6777
20.1777
20.1777
13.9277
8.92775
15.1777
15.1777
12.6777
10.1777
16.4277
16.4277
11.4277
7.67775
15.1777
15.1777
13.9277
5.17775
15.1777
16.4277
16.4277
11.4277
11.4277
21.4277
11.4277
17.6777
25.1777
15.1777
13.9277
22.6777
13.9277
16.4277
10.1777
18.9277
22.6777
20.1777
16.4277
11.4277
12.6777
18.9277
18.9277
25.1777
22.6777
20.1777
20.1777
10.1777
13.9277
7.67775
22.6777
16.4277
17.6777
11.4277
15.1777
17.6777
18.9277
20.1777
16.4277
16.4277
26.4277
25.1777
12.6777
13.9277
13.9277
8.92775
11.4277
10.1777
2.67775
7.67775
2.67775
0.177745
0.177745
10.1777
6.42775
7.67775
7.67775
8.92775
11.4277
3.92775
7.67775
2.67775
1.42775
5.17775
2.67775
10.1777
3.92775
1.42775
8.92775
3.92775
0.177745
3.92775
5.17775
0.177745
3.92775
2.67775
0.177745
1.42775
8.92775
1.42775
3.92775
1.42775
10.1777
3.92775
3.92775
3.92775
1.42775
2.67775
6.42775
15.1777
8.92775
7.67775
5.17775
5.17775
2.67775
1.42775
5.17775
0.177745
3.92775
7.67775
-1.07225
3.92775
2.67775
6.42775
1.42775
3.92775
-1.07225
1.42775
-2.32225
0.177745
0.177745
-3.57225
3.92775
5.17775
2.67775
7.67775
0.177745
2.67775
6.42775
7.67775
5.17775
2.67775
0.177745
2.67775
5.17775
1.42775
5.17775
5.17775
1.42775
0.177745
-1.07225
1.42775
2.67775
1.42775
6.42775
-1.07225
5.17775
2.67775
-1.07225
3.92775
-2.32225
2.67775
6.42775
-3.57225
3.92775
7.67775
2.67775
2.67775
5.17775
8.92775
8.92775
6.42775
6.42775
7.67775
5.17775
3.92775
2.67775
7.67775
2.67775
6.42775
12.6777
15.1777
11.4277
5.17775
6.42775
7.67775
6.42775
5.17775
0.177745
7.67775
7.67775
7.67775
17.6777
2.67775
13.9277
12.6777
13.9277
13.9277
11.4277
13.9277
8.92775
16.4277
16.4277
16.4277
12.6777
16.4277
22.6777
20.1777
30.1777
20.1777
18.9277
15.1777
18.9277
17.6777
22.6777
25.1777
22.6777
23.9277
25.1777
23.9277
25.1777
23.9277
22.6777
27.6777
22.6777
31.4277
21.4277
32.6777
21.4277
28.9277
22.6777
31.4277
28.9277
25.1777
35.1777
25.1777
35.1777
31.4277
28.9277
25.1777
22.6777
17.6777
22.6777
25.1777
28.9277
27.6777
13.9277
22.6777
17.6777
15.1777
23.9277
18.9277
17.6777
18.9277
18.9277
15.1777
20.1777
17.6777
23.9277
18.9277
21.4277
20.1777
22.6777
25.1777
23.9277
22.6777
21.4277
27.6777
26.4277
25.1777
17.6777
23.9277
25.1777
20.1777
22.6777
15.1777
12.6777
18.9277
17.6777
17.6777
12.6777
23.9277
12.6777
17.6777
23.9277
21.4277
20.1777
21.4277
20.1777
18.9277
17.6777
15.1777
16.4277
13.9277
7.67775
10.1777
12.6777
13.9277
20.1777
20.1777
27.6777
30.1777
28.9277
31.4277
28.9277
26.4277
25.1777
27.6777
27.6777
21.4277
22.6777
20.1777
27.6777
25.1777
22.6777
22.6777
28.9277
22.6777
27.6777
28.9277
25.1777
27.6777
26.4277
22.6777
17.6777
23.9277
31.4277
26.4277
32.6777
25.1777
31.4277
27.6777
13.9277
12.6777
12.6777
13.9277
12.6777
13.9277
10.1777
17.6777
13.9277
13.9277
12.6777
16.4277
17.6777
23.9277
25.1777
28.9277
27.6777
21.4277
26.4277
16.4277
17.6777
20.1777
22.6777
30.1777
21.4277
23.9277
28.9277
27.6777
33.9277
30.1777
30.1777
31.4277
32.6777
32.6777
36.4277
32.6777
30.1777
33.9277
37.6777
36.4277
41.4277
41.4277
42.6777
41.4277
41.4277
40.1777
38.9277
38.9277
41.4277
43.9277
36.4277
43.9277
46.4277
40.1777
40.1777
43.9277
43.9277
43.9277
42.6777
47.6777
50.1777
46.4277
43.9277
48.9277
51.4277
51.4277
47.6777
50.1777
48.9277
53.9277
55.1777
51.4277
52.6777
46.4277
46.4277
45.1777
50.1777
55.1777
55.1777
47.6777
48.9277
42.6777
43.9277
46.4277
52.6777
50.1777
52.6777
57.6777
53.9277
51.4277
45.1777
40.1777
45.1777
58.9277
50.1777
52.6777
58.9277
62.6777
62.6777
62.6777
58.9277
61.4277
60.1777
56.4277
53.9277
61.4277
57.6777
52.6777
57.6777
57.6777
56.4277
56.4277
57.6777
57.6777
55.1777
61.4277
61.4277
60.1777
60.1777
58.9277
57.6777
53.9277
63.9277
60.1777
61.4277
62.6777
62.6777
58.9277
55.1777
58.9277
53.9277
56.4277
56.4277
47.6777
55.1777
60.1777
57.6777
48.9277
51.4277
56.4277
52.6777
50.1777
57.6777
56.4277
56.4277
51.4277
57.6777
52.6777
55.1777
57.6777
56.4277
62.6777
57.6777
56.4277
56.4277
58.9277
66.4277
70.1777
56.4277
62.6777
66.4277
67.6777
66.4277
66.4277
52.6777
56.4277
56.4277
60.1777
58.9277
60.1777
61.4277
56.4277
60.1777
53.9277
62.6777
53.9277
61.4277
61.4277
61.4277
67.6777
62.6777
66.4277
63.9277
58.9277
48.9277
47.6777
51.4277
50.1777
51.4277
53.9277
50.1777
55.1777
47.6777
57.6777
50.1777
51.4277
53.9277
48.9277
55.1777
65.1777
48.9277
56.4277
56.4277
55.1777
51.4277
58.9277
52.6777
51.4277
46.4277
46.4277
52.6777
55.1777
58.9277
46.4277
41.4277
53.9277
58.9277
56.4277
57.6777
58.9277
51.4277
43.9277
52.6777
53.9277
51.4277
55.1777
51.4277
51.4277
53.9277
45.1777
50.1777
48.9277
47.6777
53.9277
45.1777
47.6777
48.9277
50.1777
53.9277
50.1777
47.6777
51.4277
58.9277
57.6777
62.6777
57.6777
61.4277
57.6777
55.1777
58.9277
63.9277
68.9277
62.6777
68.9277
62.6777
63.9277
73.9277
63.9277
62.6777
71.4277
63.9277
62.6777
63.9277
58.9277
55.1777
60.1777
56.4277
61.4277
65.1777
66.4277
53.9277
61.4277
53.9277
55.1777
55.1777
57.6777
61.4277
62.6777
75.1777
68.9277
70.1777
73.9277
71.4277
71.4277
68.9277
72.6777
73.9277
75.1777
81.4277
81.4277
76.4277
75.1777
85.1777
72.6777
75.1777
72.6777
73.9277
77.6777
73.9277
83.9277
70.1777
72.6777
73.9277
76.4277
73.9277
78.9277
72.6777
72.6777
66.4277
78.9277
77.6777
76.4277
70.1777
81.4277
82.6777
76.4277
80.1777
81.4277
81.4277
81.4277
77.6777
77.6777
81.4277
81.4277
90.1777
92.6777
82.6777
91.4277
87.6777
86.4277
88.9277
85.1777
87.6777
88.9277
91.4277
81.4277
90.1777
95.1777
90.1777
86.4277
88.9277
96.4277
83.9277
88.9277
91.4277
83.9277
88.9277
86.4277
95.1777
97.6777
98.9277
96.4277
93.9277
91.4277
92.6777
93.9277
96.4277
90.1777
82.6777
81.4277
92.6777
91.4277
80.1777
92.6777
93.9277
87.6777
92.6777
90.1777
92.6777
95.1777
87.6777
88.9277
88.9277
97.6777
96.4277
95.1777
92.6777
95.1777
96.4277
96.4277
96.4277
92.6777
88.9277
100.178
98.9277
88.9277
85.1777
87.6777
90.1777
82.6777
76.4277
90.1777
91.4277
96.4277
90.1777
105.178
93.9277
85.1777
95.1777
96.4277
95.1777
87.6777
91.4277
93.9277
98.9277
97.6777
88.9277
93.9277
91.4277
103.928
92.6777
91.4277
97.6777
87.6777
98.9277
95.1777
91.4277
92.6777
85.1777
85.1777
86.4277
86.4277
87.6777
77.6777
83.9277
78.9277
82.6777
82.6777
85.1777
85.1777
80.1777
91.4277
80.1777
95.1777
93.9277
96.4277
87.6777
93.9277
87.6777
91.4277
93.9277
87.6777
96.4277
93.9277
92.6777
88.9277
87.6777
88.9277
88.9277
88.9277
87.6777
83.9277
82.6777
77.6777
82.6777
82.6777
90.1777
97.6777
95.1777
102.678
88.9277
92.6777
93.9277
96.4277
97.6777
93.9277
93.9277
96.4277
92.6777
93.9277
93.9277
97.6777
93.9277
92.6777
93.9277
92.6777
92.6777
101.428
101.428
95.1777
92.6777
90.1777
85.1777
87.6777
91.4277
85.1777
[truncated: 10,738 more rows]

## Sheet: FIgure1-source data2
Ex_1.x	Ex_1.d	Ex_2.x	Ex_2.d	Ex_3.x	Ex_3.d	Ex_4.x	Ex_4.d	Ex_5.x	Ex_5.d	Ex_6.x	Ex_6.d	Ex_7.x	Ex_7.d
0	6.29681	0	-9.95319	0	-2.45319	0	-7.45319	0	-4.95319	0	-6.20319	0	0.0468139
0.01667	7.54681	0.01667	-2.45319	0.01667	1.29681	0.01667	0.0468139	0.01667	5.04681	0.01667	10.0468	0.01667	-1.20319
0.03334	17.5468	0.03334	2.54681	0.03334	-4.95319	0.03334	10.0468	0.03334	0.0468139	0.03334	-2.45319	0.03334	-2.45319
0.05001	2.54681	0.05001	2.54681	0.05001	5.04681	0.05001	1.29681	0.05001	3.79681	0.05001	16.2968	0.05001	2.54681
0.06668	0.0468139	0.06668	6.29681	0.06668	12.5468	0.06668	1.29681	0.06668	2.54681	0.06668	10.0468	0.06668	3.79681
0.08335	5.04681	0.08335	2.54681	0.08335	13.7968	0.08335	6.29681	0.08335	-1.20319	0.08335	-1.20319	0.08335	12.5468
0.10002	15.0468	0.10002	12.5468	0.10002	12.5468	0.10002	6.29681	0.10002	6.29681	0.10002	1.29681	0.10002	7.54681
0.11669	10.0468	0.11669	10.0468	0.11669	15.0468	0.11669	-2.45319	0.11669	-1.20319	0.11669	1.29681	0.11669	12.5468
0.13336	15.0468	0.13336	1.29681	0.13336	15.0468	0.13336	0.0468139	0.13336	2.54681	0.13336	8.79681	0.13336	10.0468
0.15003	3.79681	0.15003	11.2968	0.15003	17.5468	0.15003	1.29681	0.15003	5.04681	0.15003	7.54681	0.15003	2.54681
0.1667	2.54681	0.1667	21.2968	0.1667	8.79681	0.1667	-1.20319	0.1667	10.0468	0.1667	1.29681	0.1667	7.54681
0.18337	12.5468	0.18337	18.7968	0.18337	23.7968	0.18337	3.79681	0.18337	1.29681	0.18337	-3.70319	0.18337	10.0468
0.20004	13.7968	0.20004	11.2968	0.20004	7.54681	0.20004	-2.45319	0.20004	6.29681	0.20004	6.29681	0.20004	6.29681
0.21671	12.5468	0.21671	17.5468	0.21671	16.2968	0.21671	3.79681	0.21671	6.29681	0.21671	10.0468	0.21671	11.2968
0.23338	13.7968	0.23338	13.7968	0.23338	27.5468	0.23338	7.54681	0.23338	7.54681	0.23338	5.04681	0.23338	7.54681
0.25005	13.7968	0.25005	21.2968	0.25005	20.0468	0.25005	-1.20319	0.25005	2.54681	0.25005	7.54681	0.25005	15.0468
0.26672	20.0468	0.26672	31.2968	0.26672	18.7968	0.26672	5.04681	0.26672	6.29681	0.26672	5.04681	0.26672	7.54681
0.28339	25.0468	0.28339	18.7968	0.28339	22.5468	0.28339	2.54681	0.28339	13.7968	0.28339	7.54681	0.28339	22.5468
0.30006	38.7968	0.30006	26.2968	0.30006	18.7968	0.30006	2.54681	0.30006	8.79681	0.30006	1.29681	0.30006	18.7968
0.31673	32.5468	0.31673	13.7968	0.31673	15.0468	0.31673	7.54681	0.31673	12.5468	0.31673	5.04681	0.31673	11.2968
0.3334	31.2968	0.3334	16.2968	0.3334	27.5468	0.3334	10.0468	0.3334	21.2968	0.3334	13.7968	0.3334	23.7968
0.35007	28.7968	0.35007	15.0468	0.35007	28.7968	0.35007	11.2968	0.35007	15.0468	0.35007	5.04681	0.35007	10.0468
0.36674	17.5468	0.36674	16.2968	0.36674	32.5468	0.36674	8.79681	0.36674	13.7968	0.36674	0.0468139	0.36674	17.5468
0.38341	22.5468	0.38341	20.0468	0.38341	32.5468	0.38341	13.7968	0.38341	27.5468	0.38341	5.04681	0.38341	13.7968
0.40008	25.0468	0.40008	40.0468	0.40008	40.0468	0.40008	17.5468	0.40008	13.7968	0.40008	3.79681	0.40008	21.2968
0.41675	33.7968	0.41675	22.5468	0.41675	41.2968	0.41675	11.2968	0.41675	22.5468	0.41675	3.79681	0.41675	23.7968
0.43342	26.2968	0.43342	25.0468	0.43342	35.0468	0.43342	17.5468	0.43342	28.7968	0.43342	3.79681	0.43342	23.7968
0.45009	40.0468	0.45009	17.5468	0.45009	41.2968	0.45009	11.2968	0.45009	15.0468	0.45009	7.54681	0.45009	23.7968
0.46676	26.2968	0.46676	20.0468	0.46676	32.5468	0.46676	15.0468	0.46676	16.2968	0.46676	2.54681	0.46676	21.2968
0.48343	28.7968	0.48343	21.2968	0.48343	41.2968	0.48343	25.0468	0.48343	21.2968	0.48343	18.7968	0.48343	20.0468
0.5001	33.7968	0.5001	11.2968	0.5001	36.2968	0.5001	17.5468	0.5001	25.0468	0.5001	13.7968	0.5001	22.5468
0.51677	31.2968	0.51677	12.5468	0.51677	38.7968	0.51677	16.2968	0.51677	13.7968	0.51677	6.29681	0.51677	15.0468
0.53344	41.2968	0.53344	13.7968	0.53344	50.0468	0.53344	23.7968	0.53344	17.5468	0.53344	12.5468	0.53344	28.7968
0.55011	42.5468	0.55011	17.5468	0.55011	42.5468	0.55011	25.0468	0.55011	27.5468	0.55011	8.79681	0.55011	38.7968
0.56678	37.5468	0.56678	13.7968	0.56678	46.2968	0.56678	26.2968	0.56678	23.7968	0.56678	11.2968	0.56678	26.2968
0.58345	37.5468	0.58345	25.0468	0.58345	43.7968	0.58345	17.5468	0.58345	30.0468	0.58345	12.5468	0.58345	21.2968
0.60012	43.7968	0.60012	25.0468	0.60012	43.7968	0.60012	23.7968	0.60012	30.0468	0.60012	12.5468	0.60012	28.7968
0.61679	46.2968	0.61679	13.7968	0.61679	48.7968	0.61679	37.5468	0.61679	30.0468	0.61679	5.04681	0.61679	27.5468
0.63346	45.0468	0.63346	22.5468	0.63346	56.2968	0.63346	37.5468	0.63346	31.2968	0.63346	2.54681	0.63346	25.0468
0.65013	42.5468	0.65013	18.7968	0.65013	50.0468	0.65013	38.7968	0.65013	28.7968	0.65013	10.0468	0.65013	22.5468
0.6668	47.5468	0.6668	30.0468	0.6668	71.2968	0.6668	32.5468	0.6668	23.7968	0.6668	7.54681	0.6668	30.0468
0.68347	53.7968	0.68347	28.7968	0.68347	65.0468	0.68347	31.2968	0.68347	27.5468	0.68347	16.2968	0.68347	30.0468
0.70014	43.7968	0.70014	43.7968	0.70014	47.5468	0.70014	36.2968	0.70014	33.7968	0.70014	8.79681	0.70014	25.0468
0.71681	62.5468	0.71681	37.5468	0.71681	63.7968	0.71681	42.5468	0.71681	37.5468	0.71681	8.79681	0.71681	28.7968
0.73348	50.0468	0.73348	27.5468	0.73348	57.5468	0.73348	33.7968	0.73348	23.7968	0.73348	17.5468	0.73348	32.5468
0.75015	40.0468	0.75015	32.5468	0.75015	71.2968	0.75015	21.2968	0.75015	30.0468	0.75015	17.5468	0.75015	35.0468
0.76682	42.5468	0.76682	46.2968	0.76682	68.7968	0.76682	36.2968	0.76682	27.5468	0.76682	8.79681	0.76682	41.2968
0.78349	52.5468	0.78349	45.0468	0.78349	72.5468	0.78349	42.5468	0.78349	35.0468	0.78349	8.79681	0.78349	32.5468
0.80016	33.7968	0.80016	35.0468	0.80016	62.5468	0.80016	40.0468	0.80016	31.2968	0.80016	22.5468	0.80016	36.2968
0.81683	52.5468	0.81683	38.7968	0.81683	72.5468	0.81683	46.2968	0.81683	37.5468	0.81683	17.5468	0.81683	41.2968
0.8335	43.7968	0.8335	43.7968	0.8335	70.0468	0.8335	56.2968	0.8335	35.0468	0.8335	18.7968	0.8335	41.2968
0.85017	50.0468	0.85017	60.0468	0.85017	82.5468	0.85017	46.2968	0.85017	30.0468	0.85017	21.2968	0.85017	48.7968
0.86684	48.7968	0.86684	41.2968	0.86684	73.7968	0.86684	40.0468	0.86684	26.2968	0.86684	18.7968	0.86684	37.5468
0.88351	46.2968	0.88351	46.2968	0.88351	77.5468	0.88351	48.7968	0.88351	23.7968	0.88351	21.2968	0.88351	50.0468
0.90018	42.5468	0.90018	51.2968	0.90018	75.0468	0.90018	42.5468	0.90018	36.2968	0.90018	16.2968	0.90018	43.7968
0.91685	53.7968	0.91685	52.5468	0.91685	88.7968	0.91685	53.7968	0.91685	27.5468	0.91685	23.7968	0.91685	30.0468
0.93352	61.2968	0.93352	60.0468	0.93352	65.0468	0.93352	45.0468	0.93352	28.7968	0.93352	27.5468	0.93352	52.5468
0.95019	68.7968	0.95019	52.5468	0.95019	90.0468	0.95019	48.7968	0.95019	28.7968	0.95019	18.7968	0.95019	52.5468
0.96686	71.2968	0.96686	51.2968	0.96686	87.5468	0.96686	47.5468	0.96686	30.0468	0.96686	18.7968	0.96686	52.5468
0.98353	60.0468	0.98353	62.5468	0.98353	75.0468	0.98353	45.0468	0.98353	22.5468	0.98353	25.0468	0.98353	52.5468
1.0002	66.2968	1.0002	62.5468	1.0002	78.7968	1.0002	42.5468	1.0002	33.7968	1.0002	27.5468	1.0002	52.5468
1.01687	67.5468	1.01687	61.2968	1.01687	68.7968	1.01687	48.7968	1.01687	37.5468	1.01687	40.0468	1.01687	53.7968
1.03354	61.2968	1.03354	63.7968	1.03354	88.7968	1.03354	43.7968	1.03354	38.7968	1.03354	30.0468	1.03354	60.0468
1.05021	62.5468	1.05021	65.0468	1.05021	82.5468	1.05021	48.7968	1.05021	25.0468	1.05021	32.5468	1.05021	62.5468
1.06688	53.7968	1.06688	72.5468	1.06688	88.7968	1.06688	55.0468	1.06688	27.5468	1.06688	38.7968	1.06688	55.0468
1.08355	67.5468	1.08355	63.7968	1.08355	81.2968	1.08355	57.5468	1.08355	18.7968	1.08355	25.0468	1.08355	51.2968
1.10022	65.0468	1.10022	73.7968	1.10022	71.2968	1.10022	57.5468	1.10022	28.7968	1.10022	38.7968	1.10022	61.2968
1.11689	65.0468	1.11689	76.2968	1.11689	82.5468	1.11689	55.0468	1.11689	31.2968	1.11689	43.7968	1.11689	65.0468
1.13356	62.5468	1.13356	67.5468	1.13356	82.5468	1.13356	56.2968	1.13356	32.5468	1.13356	31.2968	1.13356	71.2968
1.15023	68.7968	1.15023	83.7968	1.15023	81.2968	1.15023	56.2968	1.15023	30.0468	1.15023	31.2968	1.15023	77.5468
1.1669	72.5468	1.1669	81.2968	1.1669	82.5468	1.1669	67.5468	1.1669	25.0468	1.1669	26.2968	1.1669	76.2968
1.18357	73.7968	1.18357	81.2968	1.18357	90.0468	1.18357	62.5468	1.18357	35.0468	1.18357	32.5468	1.18357	60.0468
1.20024	75.0468	1.20024	78.7968	1.20024	86.2968	1.20024	68.7968	1.20024	22.5468	1.20024	35.0468	1.20024	76.2968
1.21691	71.2968	1.21691	78.7968	1.21691	87.5468	1.21691	68.7968	1.21691	40.0468	1.21691	40.0468	1.21691	67.5468
1.23358	82.5468	1.23358	81.2968	1.23358	73.7968	1.23358	67.5468	1.23358	41.2968	1.23358	46.2968	1.23358	78.7968
1.25025	78.7968	1.25025	93.7968	1.25025	83.7968	1.25025	66.2968	1.25025	33.7968	1.25025	43.7968	1.25025	68.7968
1.26692	75.0468	1.26692	83.7968	1.26692	86.2968	1.26692	72.5468	1.26692	43.7968	1.26692	53.7968	1.26692	78.7968
1.28359	77.5468	1.28359	92.5468	1.28359	90.0468	1.28359	65.0468	1.28359	36.2968	1.28359	52.5468	1.28359	72.5468
1.30026	85.0468	1.30026	72.5468	1.30026	95.0468	1.30026	71.2968	1.30026	41.2968	1.30026	53.7968	1.30026	73.7968
1.31693	82.5468	1.31693	83.7968	1.31693	93.7968	1.31693	80.0468	1.31693	52.5468	1.31693	62.5468	1.31693	67.5468
1.3336	81.2968	1.3336	85.0468	1.3336	95.0468	1.3336	83.7968	1.3336	31.2968	1.3336	53.7968	1.3336	80.0468
1.35027	82.5468	1.35027	87.5468	1.35027	97.5468	1.35027	77.5468	1.35027	47.5468	1.35027	65.0468	1.35027	82.5468
1.36694	87.5468	1.36694	80.0468	1.36694	95.0468	1.36694	76.2968	1.36694	37.5468	1.36694	53.7968	1.36694	87.5468
1.38361	85.0468	1.38361	88.7968	1.38361	93.7968	1.38361	76.2968	1.38361	36.2968	1.38361	45.0468	1.38361	85.0468
1.40028	90.0468	1.40028	96.2968	1.40028	91.2968	1.40028	83.7968	1.40028	31.2968	1.40028	75.0468	1.40028	91.2968
1.41695	92.5468	1.41695	100.047	1.41695	87.5468	1.41695	81.2968	1.41695	52.5468	1.41695	65.0468	1.41695	93.7968
1.43362	87.5468	1.43362	87.5468	1.43362	102.547	1.43362	86.2968	1.43362	55.0468	1.43362	66.2968	1.43362	80.0468
1.45029	80.0468	1.45029	95.0468	1.45029	106.297	1.45029	83.7968	1.45029	56.2968	1.45029	63.7968	1.45029	86.2968
1.46696	82.5468	1.46696	93.7968	1.46696	97.5468	1.46696	76.2968	1.46696	45.0468	1.46696	70.0468	1.46696	88.7968
1.48363	80.0468	1.48363	108.797	1.48363	108.797	1.48363	86.2968	1.48363	55.0468	1.48363	72.5468	1.48363	82.5468
1.5003	88.7968	1.5003	87.5468	1.5003	103.797	1.5003	88.7968	1.5003	53.7968	1.5003	66.2968	1.5003	90.0468
1.51697	86.2968	1.51697	98.7968	1.51697	106.297	1.51697	76.2968	1.51697	61.2968	1.51697	77.5468	1.51697	91.2968
1.53364	103.797	1.53364	98.7968	1.53364	98.7968	1.53364	61.2968	1.53364	45.0468	1.53364	68.7968	1.53364	95.0468
1.55031	91.2968	1.55031	102.547	1.55031	106.297	1.55031	62.5468	1.55031	48.7968	1.55031	71.2968	1.55031	86.2968
1.56698	91.2968	1.56698	111.297	1.56698	107.547	1.56698	65.0468	1.56698	48.7968	1.56698	86.2968	1.56698	90.0468
1.58365	97.5468	1.58365	101.297	1.58365	106.297	1.58365	65.0468	1.58365	51.2968	1.58365	71.2968	1.58365	92.5468
1.60032	97.5468	1.60032	107.547	1.60032	111.297	1.60032	68.7968	1.60032	52.5468	1.60032	72.5468	1.60032	103.797
1.61699	90.0468	1.61699	108.797	1.61699	121.297	1.61699	72.5468	1.61699	52.5468	1.61699	70.0468	1.61699	96.2968
1.63366	81.2968	1.63366	100.047	1.63366	111.297	1.63366	77.5468	1.63366	51.2968	1.63366	65.0468	1.63366	87.5468
1.65033	72.5468	1.65033	113.797	1.65033	108.797	1.65033	80.0468	1.65033	51.2968	1.65033	65.0468	1.65033	91.2968
1.667	77.5468	1.667	110.047	1.667	118.797	1.667	73.7968	1.667	63.7968	1.667	72.5468	1.667	80.0468
1.68367	88.7968	1.68367	115.047	1.68367	128.797	1.68367	78.7968	1.68367	63.7968	1.68367	83.7968	1.68367	87.5468
1.70034	88.7968	1.70034	113.797	1.70034	121.297	1.70034	81.2968	1.70034	57.5468	1.70034	90.0468	1.70034	73.7968
1.71701	83.7968	1.71701	120.047	1.71701	128.797	1.71701	78.7968	1.71701	68.7968	1.71701	92.5468	1.71701	76.2968
1.73368	92.5468	1.73368	121.297	1.73368	116.297	1.73368	72.5468	1.73368	60.0468	1.73368	88.7968	1.73368	82.5468
1.75035	82.5468	1.75035	120.047	1.75035	126.297	1.75035	68.7968	1.75035	58.7968	1.75035	88.7968	1.75035	77.5468
1.76702	95.0468	1.76702	120.047	1.76702	125.047	1.76702	76.2968	1.76702	72.5468	1.76702	93.7968	1.76702	75.0468
1.78369	92.5468	1.78369	122.547	1.78369	118.797	1.78369	82.5468	1.78369	66.2968	1.78369	92.5468	1.78369	82.5468
1.80036	95.0468	1.80036	125.047	1.80036	120.047	1.80036	86.2968	1.80036	70.0468	1.80036	87.5468	1.80036	83.7968
1.81703	85.0468	1.81703	120.047	1.81703	135.047	1.81703	88.7968	1.81703	68.7968	1.81703	82.5468	1.81703	82.5468
1.8337	88.7968	1.8337	120.047	1.8337	125.047	1.8337	92.5468	1.8337	70.0468	1.8337	85.0468	1.8337	87.5468
1.85037	101.297	1.85037	116.297	1.85037	121.297	1.85037	95.0468	1.85037	76.2968	1.85037	75.0468	1.85037	82.5468
1.86704	97.5468	1.86704	132.547	1.86704	128.797	1.86704	91.2968	1.86704	77.5468	1.86704	90.0468	1.86704	95.0468
1.88371	108.797	1.88371	141.297	1.88371	147.547	1.88371	93.7968	1.88371	62.5468	1.88371	88.7968	1.88371	86.2968
1.90038	108.797	1.90038	146.297	1.90038	146.297	1.90038	92.5468	1.90038	82.5468	1.90038	85.0468	1.90038	93.7968
1.91705	101.297	1.91705	142.547	1.91705	132.547	1.91705	88.7968	1.91705	68.7968	1.91705	90.0468	1.91705	85.0468
1.93372	107.547	1.93372	150.047	1.93372	142.547	1.93372	98.7968	1.93372	78.7968	1.93372	87.5468	1.93372	85.0468
1.95039	107.547	1.95039	127.547	1.95039	145.047	1.95039	93.7968	1.95039	78.7968	1.95039	96.2968	1.95039	86.2968
1.96706	112.547	1.96706	138.797	1.96706	141.297	1.96706	88.7968	1.96706	97.5468	1.96706	98.7968	1.96706	93.7968
1.98373	113.797	1.98373	142.547	1.98373	145.047	1.98373	96.2968	1.98373	70.0468	1.98373	90.0468	1.98373	101.297
2.0004	103.797	2.0004	146.297	2.0004	157.547	2.0004	88.7968	2.0004	76.2968	2.0004	83.7968	2.0004	102.547
2.01707	97.5468	2.01707	137.547	2.01707	152.547	2.01707	102.547	2.01707	87.5468	2.01707	85.0468	2.01707	91.2968
2.03374	107.547	2.03374	150.047	2.03374	150.047	2.03374	97.5468	2.03374	81.2968	2.03374	86.2968	2.03374	102.547
2.05041	112.547	2.05041	135.047	2.05041	148.797	2.05041	97.5468	2.05041	93.7968	2.05041	81.2968	2.05041	107.547
2.06708	112.547	2.06708	143.797	2.06708	156.297	2.06708	102.547	2.06708	87.5468	2.06708	82.5468	2.06708	108.797
2.08375	110.047	2.08375	145.047	2.08375	150.047	2.08375	96.2968	2.08375	88.7968	2.08375	95.0468	2.08375	116.297
2.10042	105.047	2.10042	151.297	2.10042	157.547	2.10042	113.797	2.10042	93.7968	2.10042	88.7968	2.10042	105.047
2.11709	107.547	2.11709	158.797	2.11709	150.047	2.11709	113.797	2.11709	90.0468	2.11709	86.2968	2.11709	97.5468
2.13376	117.547	2.13376	155.047	2.13376	150.047	2.13376	103.797	2.13376	97.5468	2.13376	85.0468	2.13376	98.7968
2.15043	107.547	2.15043	165.047	2.15043	170.047	2.15043	107.547	2.15043	97.5468	2.15043	86.2968	2.15043	97.5468
2.1671	111.297			2.1671	158.797	2.1671	98.7968	2.1671	77.5468	2.1671	98.7968	2.1671	95.0468
2.18377	115.047			2.18377	150.047	2.18377	92.5468	2.18377	98.7968	2.18377	91.2968	2.18377	98.7968
2.20044	121.297			2.20044	165.047	2.20044	96.2968	2.20044	86.2968	2.20044	86.2968	2.20044	100.047
2.21711	117.547			2.21711	161.297	2.21711	101.297	2.21711	87.5468	2.21711	95.0468	2.21711	111.297
2.23378	125.047			2.23378	166.297	2.23378	102.547	2.23378	93.7968	2.23378	88.7968	2.23378	95.0468
2.25045	123.797					2.25045	93.7968	2.25045	83.7968	2.25045	100.047	2.25045	105.047
2.26712	126.297					2.26712	105.047	2.26712	86.2968	2.26712	83.7968	2.26712	103.797
2.28379	121.297					2.28379	97.5468	2.28379	95.0468	2.28379	86.2968	2.28379	92.5468
2.30046	112.547					2.30046	101.297	2.30046	101.297	2.30046	78.7968	2.30046	95.0468
2.31713	115.047					2.31713	112.547	2.31713	93.7968	2.31713	91.2968	2.31713	100.047
2.3338	130.047					2.3338	103.797	2.3338	92.5468	2.3338	85.0468	2.3338	106.297
2.35047	117.547					2.35047	102.547	2.35047	100.047	2.35047	93.7968	2.35047	102.547
2.36714	126.297					2.36714	102.547	2.36714	90.0468	2.36714	92.5468	2.36714	101.297
2.38381	122.547					2.38381	116.297	2.38381	92.5468	2.38381	85.0468	2.38381	98.7968
2.40048	125.047					2.40048	108.797	2.40048	98.7968	2.40048	88.7968	2.40048	102.547
2.41715	127.547					2.41715	118.797	2.41715	103.797	2.41715	81.2968	2.41715	92.5468
2.43382	133.797					2.43382	120.047	2.43382	97.5468	2.43382	90.0468	2.43382	96.2968
2.45049	137.547					2.45049	108.797	2.45049	102.547	2.45049	91.2968	2.45049	95.0468
2.46716	128.797					2.46716	121.297	2.46716	103.797	2.46716	93.7968	2.46716	78.7968
2.48383	147.547					2.48383	107.547	2.48383	98.7968	2.48383	97.5468	2.48383	87.5468
2.5005	131.297					2.5005	118.797	2.5005	106.297	2.5005	96.2968	2.5005	92.5468
2.51717	140.047					2.51717	111.297	2.51717	106.297	2.51717	102.547	2.51717	86.2968
2.53384	133.797					2.53384	105.047	2.53384	103.797	2.53384	96.2968	2.53384	78.7968
2.55051	140.047					2.55051	113.797	2.55051	103.797	2.55051	106.297	2.55051	87.5468
2.56718	138.797					2.56718	106.297	2.56718	105.047	2.56718	100.047	2.56718	90.0468
2.58385	133.797					2.58385	123.797	2.58385	97.5468	2.58385	83.7968	2.58385	101.297
2.60052	135.047					2.60052	130.047	2.60052	90.0468	2.60052	90.0468	2.60052	102.547
2.61719	151.297					2.61719	138.797	2.61719	115.047	2.61719	97.5468	2.61719	90.0468
2.63386	141.297					2.63386	125.047	2.63386	115.047	2.63386	96.2968	2.63386	97.5468
2.65053	147.547					2.65053	125.047	2.65053	117.547	2.65053	101.297	2.65053	98.7968
2.6672	136.297					2.6672	136.297	2.6672	118.797	2.6672	103.797	2.6672	88.7968
2.68387	147.547					2.68387	125.047	2.68387	107.547	2.68387	100.047	2.68387	93.7968
2.70054	140.047					2.70054	133.797	2.70054	111.297	2.70054	101.297	2.70054	98.7968
2.71721	155.047					2.71721	127.547	2.71721	113.797	2.71721	108.797	2.71721	95.0468
2.73388	148.797					2.73388	132.547	2.73388	116.297	2.73388	102.547	2.73388	96.2968
2.75055	151.297					2.75055	146.297	2.75055	116.297	2.75055	100.047	2.75055	100.047
2.76722	150.047					2.76722	142.547	2.76722	126.297	2.76722	105.047	2.76722	78.7968
2.78389	160.047					2.78389	141.297	2.78389	115.047	2.78389	112.547	2.78389	83.7968
2.80056	162.547					2.80056	140.047	2.80056	116.297	2.80056	117.547	2.80056	82.5468
2.81723	156.297					2.81723	140.047	2.81723	115.047	2.81723	106.297	2.81723	87.5468
2.8339	145.047					2.8339	147.547	2.8339	120.047	2.8339	108.797	2.8339	96.2968
2.85057	152.547					2.85057	140.047	2.85057	115.047	2.85057	103.797	2.85057	101.297
2.86724	158.797					2.86724	157.547	2.86724	112.547	2.86724	105.047	2.86724	98.7968
2.88391	162.547					2.88391	152.547	2.88391	103.797	2.88391	108.797	2.88391	100.047
2.90058	172.547					2.90058	146.297	2.90058	108.797	2.90058	106.297	2.90058	91.2968
2.91725	147.547					2.91725	158.797	2.91725	118.797	2.91725	112.547	2.91725	103.797
2.93392	163.797					2.93392	148.797	2.93392	120.047	2.93392	113.797	2.93392	97.5468
2.95059	157.547					2.95059	150.047	2.95059	127.547	2.95059	110.047	2.95059	96.2968
2.96726	155.047					2.96726	151.297	2.96726	122.547	2.96726	117.547	2.96726	95.0468
2.98393	166.297					2.98393	166.297	2.98393	125.047	2.98393	100.047	2.98393	101.297
3.0006	157.547					3.0006	163.797	3.0006	122.547	3.0006	105.047	3.0006	86.2968
3.01727	161.297					3.01727	163.797	3.01727	117.547	3.01727	108.797	3.01727	101.297
3.03394	166.297					3.03394	166.297	3.03394	122.547	3.03394	105.047	3.03394	100.047
3.05061	168.797					3.05061	148.797	3.05061	118.797	3.05061	100.047	3.05061	82.5468
3.06728	163.797					3.06728	148.797	3.06728	128.797	3.06728	116.297	3.06728	91.2968
3.08395	166.297					3.08395	153.797	3.08395	140.047	3.08395	111.297	3.08395	87.5468
3.10062	167.547					3.10062	153.797	3.10062	132.547	3.10062	98.7968	3.10062	97.5468
						3.11729	155.047	3.11729	142.547	3.11729	123.797	3.11729	96.2968
						3.13396	171.297	3.13396	132.547	3.13396	108.797	3.13396	91.2968
						3.15063	172.547	3.15063	142.547	3.15063	121.297	3.15063	93.7968
						3.1673	167.547	3.1673	141.297	3.1673	111.297	3.1673	102.547
						3.18397	163.797	3.18397	136.297	3.18397	118.797	3.18397	82.5468
						3.20064	167.547	3.20064	153.797	3.20064	117.547	3.20064	93.7968
						3.21731	155.047	3.21731	151.297	3.21731	121.297	3.21731	101.297
						3.23398	160.047	3.23398	148.797	3.23398	122.547	3.23398	101.297
						3.25065	156.297	3.25065	146.297	3.25065	115.047	3.25065	91.2968
						3.26732	172.547	3.26732	160.047	3.26732	120.047	3.26732	103.797
								3.28399	160.047	3.28399	116.297	3.28399	101.297
								3.30066	167.547	3.30066	130.047	3.30066	88.7968
								3.31733	163.797	3.31733	132.547	3.31733	81.2968
								3.334	162.547	3.334	120.047	3.334	92.5468
								3.35067	156.297	3.35067	132.547	3.35067	93.7968
								3.36734	152.547	3.36734	133.797	3.36734	92.5468
								3.38401	148.797	3.38401	145.047	3.38401	97.5468
								3.40068	146.297	3.40068	137.547	3.40068	95.0468
								3.41735	162.547	3.41735	137.547	3.41735	101.297
										3.43402	146.297	3.43402	83.7968
										3.45069	140.047	3.45069	87.5468
										3.46736	145.047	3.46736	92.5468
										3.48403	150.047	3.48403	77.5468
										3.5007	142.547	3.5007	81.2968
										3.51737	148.797	3.51737	91.2968
										3.53404	151.297	3.53404	90.0468
										3.55071	157.547	3.55071	95.0468
										3.56738	150.047	3.56738	101.297
										3.58405	142.547	3.58405	103.797
										3.60072	158.797	3.60072	97.5468
										3.61739	148.797	3.61739	100.047
										3.63406	155.047	3.63406	93.7968
										3.65073	153.797	3.65073	93.7968
										3.6674	147.547	3.6674	90.0468
										3.68407	151.297	3.68407	87.5468
										3.70074	163.797	3.70074	81.2968
										3.71741	171.297	3.71741	78.7968
										3.73408	145.047	3.73408	83.7968
										3.75075	155.047	3.75075	83.7968
										3.76742	151.297	3.76742	82.5468
										3.78409	155.047	3.78409	100.047
										3.80076	143.797	3.80076	92.5468
										3.81743	156.297	3.81743	91.2968
										3.8341	161.297	3.8341	90.0468
										3.85077	167.547	3.85077	98.7968
										3.86744	163.797	3.86744	95.0468
										3.88411	158.797	3.88411	93.7968
										3.90078	158.797	3.90078	97.5468
										3.91745	157.547	3.91745	103.797
										3.93412	165.047	3.93412	101.297
										3.95079	165.047	3.95079	106.297
										3.96746	166.297	3.96746	103.797
										3.98413	163.797	3.98413	97.5468
										4.0008	177.547	4.0008	107.547
										4.01747	173.797	4.01747	102.547
										4.03414	160.047	4.03414	110.047
										4.05081	163.797	4.05081	102.547
										4.06748	157.547	4.06748	117.547
										4.08415	168.797	4.08415	118.797
												4.10082	115.047
												4.11749	101.297
												4.13416	108.797
												4.15083	108.797
												4.1675	106.297
												4.18417	122.547
												4.20084	110.047
												4.21751	115.047
												4.23418	123.797
												4.25085	108.797
												4.26752	127.547
												4.28419	118.797
												4.30086	115.047
												4.31753	117.547
												4.3342	125.047
												4.35087	117.547
												4.36754	131.297
												4.38421	130.047
												4.40088	130.047
												4.41755	128.797
												4.43422	140.047
												4.45089	132.547
												4.46756	136.297
												4.48423	141.297
												4.5009	151.297
												4.51757	137.547
												4.53424	135.047
												4.55091	132.547
												4.56758	136.297
												4.58425	132.547
												4.60092	140.047
												4.61759	141.297
												4.63426	150.047
												4.65093	158.797
												4.6676	153.797
												4.68427	147.547
												4.70094	156.297
												4.71761	155.047
												4.73428	156.297
												4.75095	160.047
												4.76762	151.297
												4.78429	150.047
												4.80096	153.797
												4.81763	160.047
												4.8343	148.797
												4.85097	155.047
												4.86764	162.547
												4.88431	178.797
												4.90098	170.047
												4.91765	181.297
												4.93432	167.547
												4.95099	163.797
												4.96766	171.297
												4.98433	170.047
												5.001	171.297
												5.01767	171.297
												5.03434	167.547
												5.05101	167.547
