# Supplementary material for: Homology sensing via non-linear amplification of sequence-dependent pausing by RecQ helicase
Source: eLife. 2019 Aug 29;8:e45909. doi: 10.7554/eLife.45909 (PMC6773442; doi:10.7554/eLife.45909)
Supplement: Figure 2—source data 1. [file elife-45909-fig2-data1.xlsx]

## Sheet: Figure 2—source data 1
RecQwt_histogram_x	RecQwt_histogram_d	DNA_duplex_stability_x	DNA_duplex_stability_d
0	0.00782113	0	0.542014
1	0.00901672	1	0.55088
2	0.0096281	2	0.526421
3	0.0111996	3	0.518917
4	0.0119649	4	0.533183
5	0.012771	5	0.581929
6	0.0118925	6	0.604113
7	0.0112539	7	0.59912
8	0.0105293	8	0.602913
9	0.0102802	9	0.61498
10	0.0116072	10	0.633787
11	0.012993	11	0.623586
12	0.0146641	12	0.605647
13	0.0147682	13	0.591833
14	0.0154792	14	0.618521
15	0.0152528	15	0.652134
16	0.0151849	16	0.662154
17	0.0158325	17	0.641873
18	0.0161223	18	0.641873
19	0.0156287	19	0.672277
20	0.015991	20	0.725885
21	0.0155698	21	0.739692
22	0.0149358	22	0.711835
23	0.014741	23	0.642075
24	0.0139485	24	0.593599
25	0.0129794	25	0.583457
26	0.0111226	26	0.583457
27	0.00927033	27	0.584514
28	0.00716447	28	0.543312
29	0.00517182	29	0.506988
30	0.00443816	30	0.471332
31	0.00390377	31	0.474615
32	0.00378603	32	0.497452
33	0.00320635	33	0.533523
34	0.0026946	34	0.546223
35	0.00240476	35	0.543046
36	0.00215115	36	0.55126
37	0.0020334	37	0.592061
38	0.00197	38	0.643782
39	0.00189301	39	0.653518
40	0.00163035	40	0.616986
41	0.00134504	41	0.544502
42	0.00109143	42	0.504753
43	0.00101444	43	0.503452
44	0.000864989	44	0.511323
45	0.000860461	45	0.504394
46	0.000851403	46	0.481583
47	0.00106425	47	0.478305
48	0.00110048	48	0.502012
49	0.00119106	49	0.53963
50	0.00119106	50	0.573575
51	0.00148543	51	0.578152
52	0.00190207	52	0.578125
53	0.00221455	53	0.568792
54	0.00288934	54	0.568792
55	0.00329239	55	0.559488
56	0.00386754	56	0.551638
57	0.00365922	57	0.531439
58	0.00341014	58	0.511239
59	0.00263573	59	0.507211
60	0.00218738	60	0.507234
61	0.00162129	61	0.498486
62	0.00139485	62	0.473929
63	0.00114124	63	0.48031
64	0.000919334	64	0.503051
65	0.000742713	65	0.546668
66	0.000819702	66	0.554256
67	0.000905748	67	0.52236
68	0.000951035	68	0.473708
69	0.00105973	69	0.454158
70	0.00125446	70	0.481939
71	0.00149448	71	0.513086
72	0.00150354	72	0.513086
73	0.00138127	73	0.497652
74	0.00137674	74	0.510762
75	0.00161676	75	0.569033
76	0.00163035	76	0.66164
77	0.00180244	77	0.750068
78	0.00185678	78	0.817514
79	0.00228701	79	0.850624
80	0.00301614	80	0.896758
81	0.00340108	81	0.948379
82	0.004728	82	1
83	0.00760375	83	1
84	0.011186	84	0.962671
85	0.0163352	85	0.911009
86	0.0222089	86	0.853148
87	0.0262803	87	0.783518
88	0.0296134	88	0.721166
89	0.0287983	89	0.690456
90	0.0268192	90	0.683401
91	0.023563	91	0.700611
92	0.0191158	92	0.729814
93	0.0142701	93	0.747057
94	0.0101308	94	0.747091
95	0.00739996	95	0.760326
96	0.00543902	96	0.772401
97	0.00430683	97	0.762244
98	0.00371357	98	0.705953
99	0.00351883	99	0.658199
100	0.00303426	100	0.60572
101	0.00309766	101	0.558917
102	0.00297538	102	0.527907
103	0.00274442	103	0.500963
104	0.00247722	104	0.47463
105	0.00288934	105	0.448297
106	0.00276706	106	0.437808
107	0.00306143	107	0.420997
108	0.00354147	108	0.410746
109	0.00416191	109	0.410746
110	0.00515823	110	0.410746
111	0.00581943	111	0.410746
112	0.00668442	112	0.410746
113	0.00766716	113	0.410746
114	0.00744978	114	0.410746
115	0.00825136	115	0.424308
116	0.00836005	116	0.462523
117	0.00893067	117	0.494178
118	0.00924316	118	0.521668
119	0.00988171	119	0.551802
120	0.010013	120	0.581936
121	0.0105655	121	0.614308
122	0.0104931	122	0.649794
123	0.0101127	123	0.685279
124	0.00941072	124	0.694712
125	0.0085412	125	0.694678
126	0.00707389	126	0.67838
127	0.00623155	127	0.65408
128	0.00506766	128	0.637784
129	0.00423437	129	0.637753
130	0.00334221	130	0.618197
131	0.00283499	131	0.559934
132	0.00238665	132	0.479857
133	0.00185678	133	0.428918
134	0.00138579	134	0.400503
135	0.00129975	135	0.387616
136	0.00089669	136	0.37329
137	0.000806116	137	0.361015
138	0.000711012	138	0.36171
139	0.000597794	139	0.373186
140	0.000452874	140	0.38665
141	0.000529863	141	0.396531
142	0.000584207	142	0.403299
143	0.000457403	143	0.396
144	0.000534391	144	0.382488
145	0.000570621	145	0.358792
146	0.000543449	146	0.342123
147	0.000661196	147	0.33134
148	0.00072007	148	0.339714
149	0.000869518	149	0.359409
150	0.000806116	150	0.386213
151	0.00111407	151	0.422485
152	0.00115936	152	0.459224
153	0.00133598	153	0.486422
154	0.00125446	154	0.506847
155	0.00139485	155	0.532248
156	0.00172092	156	0.575714
157	0.00180697	157	0.602054
158	0.00204699	158	0.602081
159	0.00205605	159	0.583704
160	0.00200623	160	0.555447
161	0.0019066	161	0.540746
162	0.0015443	162	0.53381
163	0.00135409	163	0.537818
164	0.000996323	164	0.487029
165	0.000987265	165	0.479265
166	0.000774414
167	0.000951035
168	0.000860461
169	0.000883104
170	0.000751771
171	0.000692897
172	0.000665725
173	0.000674782
174	0.000652138

## Sheet: Figure 2—source data 2
RecQwt_Fig2a
5.17775
1.42775
5.17775
0.177745
-3.57225
2.67775
2.67775
6.42775
3.92775
2.67775
1.42775
0.177745
5.17775
2.67775
2.67775
3.92775
3.92775
0.177745
3.92775
1.42775
6.42775
1.42775
1.42775
6.42775
3.92775
5.17775
10.1777
6.42775
3.92775
5.17775
2.67775
1.42775
2.67775
2.67775
5.17775
10.1777
1.42775
2.67775
10.1777
2.67775
1.42775
6.42775
-4.82225
5.17775
5.17775
3.92775
6.42775
3.92775
3.92775
3.92775
7.67775
5.17775
3.92775
7.67775
1.42775
5.17775
3.92775
5.17775
8.92775
5.17775
2.67775
8.92775
5.17775
2.67775
-1.07225
2.67775
0.177745
6.42775
5.17775
5.17775
0.177745
6.42775
2.67775
2.67775
1.42775
10.1777
0.177745
1.42775
6.42775
-2.32225
3.92775
5.17775
6.42775
2.67775
6.42775
-1.07225
1.42775
2.67775
6.42775
3.92775
6.42775
1.42775
1.42775
6.42775
7.67775
3.92775
7.67775
7.67775
7.67775
5.17775
6.42775
6.42775
1.42775
6.42775
13.9277
2.67775
8.92775
6.42775
1.42775
6.42775
6.42775
1.42775
3.92775
3.92775
3.92775
6.42775
11.4277
5.17775
5.17775
7.67775
3.92775
-1.07225
2.67775
3.92775
-2.32225
0.177745
5.17775
-2.32225
7.67775
2.67775
-2.32225
3.92775
0.177745
10.1777
-2.32225
-1.07225
5.17775
6.42775
3.92775
3.92775
7.67775
2.67775
6.42775
1.42775
3.92775
6.42775
7.67775
12.6777
3.92775
7.67775
7.67775
3.92775
3.92775
5.17775
2.67775
5.17775
2.67775
5.17775
3.92775
-3.57225
0.177745
5.17775
7.67775
6.42775
-1.07225
2.67775
5.17775
5.17775
6.42775
1.42775
3.92775
0.177745
3.92775
6.42775
1.42775
6.42775
2.67775
5.17775
0.177745
1.42775
1.42775
3.92775
6.42775
1.42775
-1.07225
0.177745
6.42775
3.92775
6.42775
-2.32225
2.67775
1.42775
6.42775
0.177745
8.92775
2.67775
10.1777
2.67775
0.177745
6.42775
6.42775
3.92775
-2.32225
3.92775
5.17775
-4.82225
0.177745
3.92775
6.42775
5.17775
3.92775
0.177745
6.42775
8.92775
0.177745
7.67775
7.67775
7.67775
5.17775
0.177745
6.42775
1.42775
7.67775
7.67775
6.42775
1.42775
3.92775
2.67775
5.17775
2.67775
-2.32225
2.67775
2.67775
1.42775
0.177745
3.92775
0.177745
-2.32225
2.67775
1.42775
-1.07225
3.92775
-1.07225
3.92775
3.92775
0.177745
10.1777
2.67775
3.92775
2.67775
2.67775
3.92775
-2.32225
3.92775
0.177745
5.17775
2.67775
0.177745
-1.07225
5.17775
5.17775
1.42775
0.177745
2.67775
5.17775
2.67775
0.177745
11.4277
-3.57225
-4.82225
-3.57225
3.92775
-1.07225
-2.32225
-4.82225
0.177745
1.42775
0.177745
5.17775
1.42775
2.67775
6.42775
3.92775
3.92775
3.92775
0.177745
2.67775
2.67775
3.92775
2.67775
1.42775
3.92775
0.177745
-1.07225
3.92775
7.67775
3.92775
-2.32225
-1.07225
0.177745
2.67775
3.92775
2.67775
1.42775
-3.57225
5.17775
2.67775
2.67775
2.67775
3.92775
1.42775
3.92775
5.17775
7.67775
6.42775
5.17775
2.67775
0.177745
2.67775
0.177745
0.177745
1.42775
2.67775
5.17775
0.177745
12.6777
3.92775
-2.32225
-1.07225
0.177745
3.92775
2.67775
0.177745
2.67775
8.92775
3.92775
-2.32225
6.42775
10.1777
-3.57225
5.17775
3.92775
-2.32225
5.17775
5.17775
2.67775
8.92775
7.67775
1.42775
7.67775
6.42775
5.17775
7.67775
1.42775
6.42775
5.17775
5.17775
8.92775
5.17775
2.67775
3.92775
5.17775
2.67775
0.177745
2.67775
5.17775
3.92775
0.177745
1.42775
1.42775
1.42775
6.42775
8.92775
1.42775
2.67775
3.92775
0.177745
3.92775
2.67775
0.177745
2.67775
5.17775
6.42775
3.92775
10.1777
5.17775
1.42775
-1.07225
3.92775
2.67775
6.42775
1.42775
1.42775
5.17775
0.177745
2.67775
2.67775
1.42775
1.42775
3.92775
1.42775
7.67775
3.92775
1.42775
0.177745
1.42775
1.42775
3.92775
10.1777
1.42775
3.92775
3.92775
8.92775
8.92775
-1.07225
0.177745
2.67775
3.92775
2.67775
-3.57225
1.42775
5.17775
-4.82225
8.92775
0.177745
6.42775
6.42775
-4.82225
1.42775
1.42775
-2.32225
12.6777
8.92775
-1.07225
7.67775
-3.57225
1.42775
3.92775
2.67775
3.92775
5.17775
5.17775
5.17775
3.92775
1.42775
3.92775
6.42775
3.92775
6.42775
3.92775
5.17775
7.67775
3.92775
6.42775
2.67775
-2.32225
-2.32225
-1.07225
2.67775
0.177745
5.17775
7.67775
3.92775
6.42775
1.42775
2.67775
-1.07225
3.92775
5.17775
2.67775
6.42775
3.92775
3.92775
0.177745
5.17775
7.67775
3.92775
-2.32225
5.17775
6.42775
1.42775
1.42775
1.42775
2.67775
3.92775
7.67775
1.42775
1.42775
3.92775
-8.57225
2.67775
3.92775
5.17775
6.42775
-2.32225
5.17775
3.92775
0.177745
6.42775
3.92775
3.92775
2.67775
2.67775
5.17775
3.92775
5.17775
2.67775
-4.82225
7.67775
6.42775
1.42775
1.42775
3.92775
1.42775
1.42775
7.67775
3.92775
1.42775
2.67775
1.42775
-1.07225
3.92775
1.42775
0.177745
0.177745
1.42775
0.177745
1.42775
3.92775
-4.82225
1.42775
3.92775
2.67775
3.92775
7.67775
5.17775
6.42775
6.42775
-6.07225
6.42775
1.42775
3.92775
1.42775
2.67775
-1.07225
-3.57225
6.42775
2.67775
-3.57225
8.92775
3.92775
3.92775
5.17775
3.92775
1.42775
1.42775
5.17775
-1.07225
6.42775
5.17775
1.42775
2.67775
5.17775
-2.32225
2.67775
7.67775
-1.07225
2.67775
1.42775
5.17775
2.67775
-2.32225
7.67775
5.17775
3.92775
2.67775
1.42775
-2.32225
3.92775
1.42775
5.17775
-1.07225
8.92775
7.67775
3.92775
6.42775
1.42775
0.177745
0.177745
-1.07225
8.92775
1.42775
11.4277
12.6777
7.67775
6.42775
0.177745
7.67775
3.92775
5.17775
2.67775
-1.07225
3.92775
3.92775
2.67775
1.42775
1.42775
3.92775
6.42775
2.67775
0.177745
1.42775
2.67775
5.17775
-1.07225
3.92775
3.92775
6.42775
1.42775
0.177745
2.67775
3.92775
3.92775
7.67775
2.67775
8.92775
7.67775
3.92775
0.177745
2.67775
2.67775
0.177745
7.67775
1.42775
7.67775
-4.82225
0.177745
2.67775
6.42775
1.42775
2.67775
2.67775
5.17775
3.92775
6.42775
5.17775
1.42775
3.92775
-2.32225
0.177745
5.17775
7.67775
5.17775
5.17775
6.42775
-2.32225
3.92775
0.177745
-1.07225
3.92775
-1.07225
2.67775
6.42775
5.17775
0.177745
6.42775
7.67775
2.67775
7.67775
6.42775
2.67775
-2.32225
5.17775
6.42775
7.67775
5.17775
5.17775
5.17775
1.42775
1.42775
7.67775
8.92775
6.42775
-1.07225
3.92775
1.42775
6.42775
0.177745
11.4277
2.67775
5.17775
0.177745
6.42775
8.92775
1.42775
0.177745
1.42775
0.177745
-1.07225
8.92775
2.67775
0.177745
0.177745
1.42775
3.92775
6.42775
6.42775
6.42775
3.92775
2.67775
5.17775
3.92775
3.92775
2.67775
6.42775
-2.32225
1.42775
2.67775
3.92775
6.42775
6.42775
5.17775
7.67775
3.92775
3.92775
0.177745
7.67775
6.42775
3.92775
7.67775
1.42775
6.42775
6.42775
7.67775
11.4277
6.42775
0.177745
3.92775
5.17775
3.92775
3.92775
10.1777
8.92775
0.177745
2.67775
3.92775
1.42775
-2.32225
1.42775
2.67775
5.17775
5.17775
6.42775
-1.07225
3.92775
10.1777
3.92775
-2.32225
3.92775
-1.07225
3.92775
5.17775
1.42775
0.177745
5.17775
1.42775
3.92775
7.67775
7.67775
5.17775
11.4277
6.42775
8.92775
-1.07225
3.92775
-4.82225
7.67775
7.67775
6.42775
6.42775
0.177745
2.67775
7.67775
2.67775
-2.32225
1.42775
2.67775
2.67775
10.1777
5.17775
10.1777
2.67775
6.42775
12.6777
1.42775
-1.07225
0.177745
0.177745
2.67775
1.42775
6.42775
2.67775
3.92775
7.67775
2.67775
7.67775
8.92775
7.67775
5.17775
6.42775
0.177745
8.92775
5.17775
5.17775
7.67775
6.42775
6.42775
11.4277
0.177745
3.92775
1.42775
11.4277
7.67775
5.17775
1.42775
1.42775
2.67775
5.17775
7.67775
-1.07225
2.67775
5.17775
5.17775
12.6777
0.177745
3.92775
6.42775
3.92775
2.67775
3.92775
2.67775
-1.07225
6.42775
7.67775
5.17775
10.1777
8.92775
11.4277
0.177745
3.92775
3.92775
6.42775
1.42775
5.17775
3.92775
7.67775
6.42775
8.92775
5.17775
2.67775
7.67775
1.42775
2.67775
0.177745
0.177745
5.17775
-4.82225
2.67775
-1.07225
1.42775
6.42775
3.92775
2.67775
6.42775
6.42775
-2.32225
6.42775
3.92775
6.42775
5.17775
8.92775
6.42775
6.42775
8.92775
0.177745
6.42775
3.92775
0.177745
5.17775
7.67775
3.92775
6.42775
6.42775
7.67775
8.92775
0.177745
2.67775
5.17775
-1.07225
-2.32225
-1.07225
0.177745
10.1777
-1.07225
6.42775
5.17775
5.17775
5.17775
0.177745
5.17775
0.177745
2.67775
7.67775
2.67775
3.92775
5.17775
5.17775
6.42775
8.92775
1.42775
6.42775
1.42775
3.92775
5.17775
0.177745
5.17775
1.42775
3.92775
-2.32225
5.17775
2.67775
1.42775
8.92775
2.67775
6.42775
5.17775
5.17775
7.67775
2.67775
2.67775
6.42775
8.92775
6.42775
2.67775
2.67775
3.92775
0.177745
6.42775
7.67775
3.92775
3.92775
1.42775
10.1777
-3.57225
5.17775
7.67775
1.42775
3.92775
2.67775
5.17775
2.67775
3.92775
2.67775
7.67775
3.92775
2.67775
-2.32225
0.177745
2.67775
6.42775
5.17775
2.67775
7.67775
8.92775
11.4277
6.42775
5.17775
5.17775
6.42775
-1.07225
2.67775
1.42775
1.42775
5.17775
3.92775
-1.07225
7.67775
5.17775
3.92775
6.42775
0.177745
5.17775
3.92775
0.177745
1.42775
2.67775
5.17775
-1.07225
2.67775
2.67775
3.92775
8.92775
1.42775
3.92775
-3.57225
11.4277
5.17775
2.67775
5.17775
0.177745
7.67775
0.177745
-1.07225
0.177745
5.17775
2.67775
7.67775
10.1777
7.67775
0.177745
6.42775
1.42775
7.67775
3.92775
2.67775
5.17775
-1.07225
-3.57225
5.17775
0.177745
5.17775
11.4277
2.67775
0.177745
0.177745
6.42775
2.67775
0.177745
5.17775
5.17775
1.42775
3.92775
5.17775
1.42775
1.42775
0.177745
6.42775
0.177745
7.67775
6.42775
10.1777
5.17775
6.42775
7.67775
7.67775
0.177745
0.177745
8.92775
-1.07225
0.177745
2.67775
7.67775
3.92775
3.92775
7.67775
2.67775
5.17775
5.17775
10.1777
6.42775
6.42775
0.177745
-3.57225
6.42775
5.17775
1.42775
-3.57225
2.67775
7.67775
3.92775
1.42775
0.177745
0.177745
8.92775
1.42775
5.17775
3.92775
-2.32225
2.67775
-2.32225
7.67775
6.42775
1.42775
-1.07225
0.177745
0.177745
6.42775
3.92775
-3.57225
-2.32225
7.67775
10.1777
7.67775
0.177745
1.42775
1.42775
6.42775
1.42775
0.177745
5.17775
7.67775
6.42775
10.1777
6.42775
7.67775
6.42775
1.42775
3.92775
3.92775
3.92775
5.17775
5.17775
7.67775
6.42775
2.67775
2.67775
0.177745
7.67775
6.42775
5.17775
3.92775
0.177745
5.17775
-1.07225
5.17775
2.67775
5.17775
5.17775
2.67775
2.67775
5.17775
-2.32225
3.92775
5.17775
5.17775
6.42775
7.67775
12.6777
7.67775
3.92775
1.42775
-2.32225
2.67775
3.92775
1.42775
3.92775
5.17775
0.177745
2.67775
1.42775
1.42775
1.42775
-1.07225
6.42775
3.92775
7.67775
0.177745
3.92775
1.42775
3.92775
-1.07225
6.42775
3.92775
2.67775
7.67775
-1.07225
5.17775
1.42775
-2.32225
-1.07225
3.92775
3.92775
2.67775
1.42775
2.67775
6.42775
5.17775
1.42775
7.67775
7.67775
6.42775
7.67775
1.42775
1.42775
0.177745
2.67775
5.17775
-1.07225
5.17775
-1.07225
3.92775
6.42775
0.177745
3.92775
3.92775
5.17775
-2.32225
-1.07225
3.92775
2.67775
5.17775
5.17775
2.67775
5.17775
3.92775
6.42775
3.92775
10.1777
10.1777
2.67775
7.67775
1.42775
5.17775
3.92775
5.17775
0.177745
10.1777
7.67775
0.177745
2.67775
3.92775
7.67775
6.42775
2.67775
5.17775
6.42775
7.67775
-3.57225
1.42775
0.177745
-3.57225
2.67775
3.92775
-1.07225
3.92775
8.92775
0.177745
-1.07225
10.1777
7.67775
5.17775
3.92775
10.1777
10.1777
2.67775
7.67775
3.92775
5.17775
0.177745
3.92775
3.92775
-2.32225
2.67775
-3.57225
0.177745
6.42775
2.67775
5.17775
2.67775
11.4277
6.42775
0.177745
5.17775
2.67775
5.17775
-1.07225
1.42775
0.177745
3.92775
6.42775
7.67775
0.177745
7.67775
6.42775
1.42775
3.92775
5.17775
3.92775
10.1777
1.42775
1.42775
10.1777
0.177745
2.67775
5.17775
2.67775
6.42775
5.17775
1.42775
1.42775
0.177745
2.67775
7.67775
6.42775
5.17775
2.67775
-1.07225
7.67775
2.67775
5.17775
6.42775
3.92775
5.17775
1.42775
7.67775
7.67775
8.92775
6.42775
5.17775
7.67775
7.67775
5.17775
6.42775
-3.57225
2.67775
5.17775
0.177745
2.67775
8.92775
6.42775
7.67775
3.92775
5.17775
2.67775
7.67775
3.92775
2.67775
1.42775
6.42775
1.42775
7.67775
2.67775
5.17775
5.17775
3.92775
7.67775
1.42775
3.92775
3.92775
7.67775
6.42775
2.67775
2.67775
-1.07225
-1.07225
2.67775
1.42775
-1.07225
-2.32225
5.17775
-1.07225
6.42775
2.67775
3.92775
3.92775
-1.07225
3.92775
2.67775
1.42775
0.177745
3.92775
3.92775
6.42775
3.92775
-1.07225
5.17775
11.4277
-2.32225
5.17775
5.17775
0.177745
8.92775
2.67775
5.17775
11.4277
1.42775
8.92775
12.6777
5.17775
6.42775
1.42775
-1.07225
5.17775
7.67775
1.42775
3.92775
2.67775
2.67775
-1.07225
5.17775
1.42775
-1.07225
2.67775
-3.57225
7.67775
-3.57225
-3.57225
2.67775
0.177745
2.67775
3.92775
-1.07225
1.42775
5.17775
-2.32225
-4.82225
0.177745
-2.32225
3.92775
3.92775
12.6777
2.67775
-1.07225
0.177745
1.42775
7.67775
8.92775
5.17775
1.42775
1.42775
2.67775
2.67775
6.42775
-3.57225
-1.07225
-2.32225
6.42775
2.67775
7.67775
1.42775
3.92775
6.42775
6.42775
-2.32225
3.92775
7.67775
8.92775
3.92775
5.17775
5.17775
5.17775
7.67775
-3.57225
2.67775
7.67775
-3.57225
3.92775
6.42775
6.42775
2.67775
2.67775
11.4277
-4.82225
3.92775
3.92775
7.67775
3.92775
3.92775
1.42775
2.67775
12.6777
6.42775
1.42775
10.1777
3.92775
5.17775
5.17775
1.42775
8.92775
3.92775
2.67775
7.67775
6.42775
2.67775
1.42775
3.92775
2.67775
-3.57225
3.92775
1.42775
0.177745
-1.07225
1.42775
-1.07225
8.92775
5.17775
8.92775
2.67775
3.92775
8.92775
3.92775
5.17775
3.92775
7.67775
3.92775
6.42775
7.67775
5.17775
2.67775
6.42775
-3.57225
0.177745
3.92775
8.92775
2.67775
3.92775
2.67775
3.92775
2.67775
5.17775
6.42775
2.67775
7.67775
5.17775
8.92775
2.67775
0.177745
10.1777
3.92775
2.67775
0.177745
-1.07225
2.67775
6.42775
3.92775
1.42775
1.42775
5.17775
0.177745
5.17775
8.92775
1.42775
7.67775
7.67775
5.17775
2.67775
3.92775
6.42775
3.92775
6.42775
5.17775
5.17775
-1.07225
-1.07225
7.67775
3.92775
8.92775
5.17775
7.67775
0.177745
8.92775
2.67775
10.1777
6.42775
11.4277
2.67775
5.17775
5.17775
3.92775
8.92775
7.67775
-1.07225
6.42775
8.92775
2.67775
12.6777
1.42775
10.1777
3.92775
5.17775
7.67775
3.92775
6.42775
5.17775
5.17775
3.92775
1.42775
-2.32225
3.92775
3.92775
0.177745
5.17775
6.42775
-1.07225
6.42775
0.177745
1.42775
6.42775
0.177745
7.67775
2.67775
5.17775
3.92775
1.42775
-2.32225
-3.57225
-1.07225
1.42775
3.92775
2.67775
6.42775
2.67775
2.67775
5.17775
6.42775
-1.07225
0.177745
-1.07225
6.42775
8.92775
0.177745
-1.07225
1.42775
2.67775
2.67775
-1.07225
1.42775
3.92775
1.42775
1.42775
0.177745
3.92775
-2.32225
0.177745
-1.07225
2.67775
1.42775
3.92775
5.17775
3.92775
-3.57225
2.67775
1.42775
-1.07225
-1.07225
-1.07225
6.42775
8.92775
0.177745
-2.32225
0.177745
5.17775
5.17775
1.42775
-1.07225
8.92775
6.42775
6.42775
3.92775
10.1777
3.92775
7.67775
7.67775
6.42775
1.42775
2.67775
-2.32225
11.4277
-1.07225
-2.32225
-1.07225
1.42775
0.177745
1.42775
2.67775
3.92775
1.42775
-1.07225
1.42775
3.92775
10.1777
-1.07225
7.67775
3.92775
-4.82225
6.42775
5.17775
1.42775
5.17775
1.42775
-1.07225
3.92775
6.42775
2.67775
0.177745
0.177745
3.92775
3.92775
-2.32225
6.42775
2.67775
2.67775
-1.07225
8.92775
1.42775
1.42775
3.92775
0.177745
1.42775
0.177745
-4.82225
8.92775
0.177745
8.92775
2.67775
7.67775
6.42775
3.92775
2.67775
2.67775
1.42775
2.67775
5.17775
1.42775
3.92775
5.17775
-3.57225
5.17775
3.92775
0.177745
3.92775
1.42775
0.177745
7.67775
5.17775
2.67775
6.42775
-1.07225
5.17775
1.42775
0.177745
0.177745
7.67775
5.17775
2.67775
0.177745
5.17775
0.177745
5.17775
10.1777
3.92775
5.17775
2.67775
3.92775
7.67775
5.17775
6.42775
3.92775
1.42775
5.17775
1.42775
1.42775
5.17775
2.67775
6.42775
1.42775
1.42775
-4.82225
-1.07225
1.42775
-1.07225
5.17775
3.92775
1.42775
6.42775
5.17775
5.17775
6.42775
0.177745
5.17775
5.17775
8.92775
1.42775
1.42775
0.177745
2.67775
8.92775
3.92775
5.17775
5.17775
2.67775
5.17775
2.67775
1.42775
2.67775
6.42775
5.17775
2.67775
8.92775
3.92775
5.17775
5.17775
3.92775
6.42775
6.42775
-3.57225
6.42775
8.92775
0.177745
1.42775
1.42775
2.67775
16.4277
2.67775
6.42775
-4.82225
1.42775
3.92775
3.92775
2.67775
5.17775
10.1777
6.42775
2.67775
10.1777
5.17775
5.17775
8.92775
1.42775
2.67775
5.17775
3.92775
7.67775
0.177745
2.67775
7.67775
2.67775
6.42775
2.67775
-1.07225
2.67775
1.42775
0.177745
6.42775
2.67775
7.67775
6.42775
5.17775
0.177745
-2.32225
5.17775
7.67775
5.17775
2.67775
1.42775
5.17775
6.42775
5.17775
3.92775
-1.07225
0.177745
5.17775
5.17775
10.1777
7.67775
2.67775
1.42775
2.67775
6.42775
7.67775
6.42775
8.92775
5.17775
2.67775
3.92775
1.42775
8.92775
-1.07225
7.67775
3.92775
6.42775
5.17775
6.42775
13.9277
1.42775
0.177745
5.17775
5.17775
6.42775
6.42775
7.67775
3.92775
2.67775
5.17775
5.17775
5.17775
8.92775
5.17775
-3.57225
5.17775
5.17775
1.42775
7.67775
2.67775
-2.32225
12.6777
5.17775
5.17775
3.92775
2.67775
3.92775
1.42775
3.92775
5.17775
2.67775
5.17775
11.4277
3.92775
1.42775
6.42775
2.67775
6.42775
15.1777
8.92775
5.17775
7.67775
5.17775
5.17775
3.92775
6.42775
1.42775
1.42775
3.92775
8.92775
-1.07225
5.17775
10.1777
6.42775
2.67775
5.17775
7.67775
5.17775
1.42775
8.92775
6.42775
3.92775
1.42775
3.92775
1.42775
-1.07225
3.92775
3.92775
3.92775
7.67775
2.67775
-1.07225
0.177745
1.42775
1.42775
5.17775
1.42775
2.67775
6.42775
6.42775
8.92775
5.17775
1.42775
6.42775
1.42775
3.92775
7.67775
-3.57225
3.92775
3.92775
5.17775
0.177745
-2.32225
2.67775
2.67775
5.17775
10.1777
2.67775
6.42775
8.92775
7.67775
-1.07225
6.42775
3.92775
2.67775
-2.32225
1.42775
1.42775
5.17775
0.177745
12.6777
6.42775
2.67775
8.92775
8.92775
[truncated: 71,532 more rows]

## Sheet: Figure 2—source data 3
Peak_Positions_x	RecQwt_PauseP_y	RecQwt_PauseP_yerr	Peak_Positions2_x	RecQdH_PauseP_y	RecQdH_PauseP_yerr
10.1913	13.3029	8.05467	34.716	38.5224	18.3162
20.3802	21.572	12.3504	54.18	53.4863	4.72991
38.5224	35.5057	13.7433	81.65	82.1899	10.7511
53.4863	56.1105	9.30284	94.013	95.6431	11.9335
82.1899	88.7057	8.72986	126.48	124.993	13.3209
95.6431	93.866	32.599	158.579	158.892	5.99196
124.993	120.329	16.4713
158.892	158.584	14.0057

## Sheet: Fig2-figsupp1
Peak_54.x	Peak_54.d	Peak_54_hist.x	Peak_54_hist.d	Peak_90.x	Peak_90.d	Peak_90_Hist.x	Peak_90_Hist.d	Peak_120.x	Peak_120.d	Peak_120_Hist.x	Peak_120_Hist.d
0	58.4277	45	0	0	90.1777	70	0	0	115.178	95	0
0.016667	62.1777	46	2	0.016667	98.9277	71	1	0.016667	107.678	96	0
0.033334	62.1777	47	2	0.033334	92.6777	72	0	0.033334	118.928	97	0
0.050001	55.9277	48	7	0.050001	93.9277	73	3	0.050001	113.928	98	0
0.066668	57.1777	49	3	0.066668	92.6777	74	0	0.066668	118.928	99	0
0.083335	54.6777	50	5	0.083335	92.6777	75	1	0.083335	120.178	100	13
0.100002	62.1777	51	10	0.100002	88.9277	76	3	0.100002	118.928	101	10
0.116669	60.9277	52	11	0.116669	95.1777	77	2	0.116669	115.178	102	5
0.133336	50.9277	53	25	0.133336	92.6777	78	3	0.133336	126.428	103	1
0.150003	49.6777	54	24	0.150003	93.9277	79	0	0.150003	125.178	104	1
0.16667	45.9277	55	27	0.16667	88.9277	80	1	0.16667	123.928	105	0
0.183337	49.6777	56	23	0.183337	90.1777	81	5	0.183337	118.928	106	8
0.200004	47.1777	57	14	0.200004	90.1777	82	2	0.200004	110.178	107	8
0.216671	50.9277	58	13	0.216671	87.6777	83	5	0.216671	112.678	108	8
0.233338	55.9277	59	7	0.233338	91.4277	84	0	0.233338	110.178	109	8
0.250005	55.9277	60	11	0.250005	93.9277	85	8	0.250005	115.178	110	4
0.266672	60.9277	61	7	0.266672	92.6777	86	9	0.266672	126.428	111	12
0.283339	63.4277	62	6	0.283339	92.6777	87	13	0.283339	111.428	112	15
0.300006	65.9277	63	1	0.300006	91.4277	88	10	0.300006	125.178	113	7
0.316673	58.4277	64	2	0.316673	95.1777	89	0	0.316673	123.928	114	16
0.33334	60.9277	65	1	0.33334	88.9277	90	23	0.33334	118.928	115	24
0.350007	63.4277	66	0	0.350007	95.1777	91	20	0.350007	122.678	116	23
0.366674	59.6777	67	0	0.366674	90.1777	92	35	0.366674	121.428	117	16
0.383341	59.6777	68	0	0.383341	90.1777	93	10	0.383341	115.178	118	8
0.400008	59.6777	69	0	0.400008	90.1777	94	0	0.400008	123.928	119	22
0.416675	65.9277			0.416675	95.1777	95	16	0.416675	123.928	120	32
0.433342	68.4277			0.433342	83.9277	96	10	0.433342	127.678	121	28
0.450009	69.6777			0.450009	93.9277	97	19	0.450009	123.928	122	17
0.466676	54.6777			0.466676	95.1777	98	8	0.466676	132.678	123	16
0.483343	58.4277			0.483343	98.9277	99	0	0.483343	115.178	124	29
0.50001	60.9277			0.50001	90.1777	100	6	0.50001	120.178	125	19
0.516677	57.1777			0.516677	87.6777	101	3	0.516677	125.178	126	15
0.533344	54.6777			0.533344	97.6777	102	1	0.533344	123.928	127	9
0.550011	55.9277			0.550011	96.4277	103	1	0.550011	127.678	128	11
0.566678	60.9277			0.566678	77.6777	104	0	0.566678	116.428	129	0
0.583345	68.4277			0.583345	76.4277			0.583345	120.178	130	2
0.600012	59.6777			0.600012	78.9277			0.600012	108.928	131	2
0.616679	63.4277			0.616679	73.9277			0.616679	116.428	132	1
0.633346	57.1777			0.633346	78.9277			0.633346	115.178	133	4
0.650013	57.1777			0.650013	75.1777			0.650013	113.928	134	6
0.66668	54.6777			0.66668	73.9277			0.66668	116.428	135	0
0.683347	59.6777			0.683347	81.4277			0.683347	116.428	136	0
0.700014	58.4277			0.700014	71.4277			0.700014	115.178	137	0
0.716681	59.6777			0.716681	73.9277			0.716681	115.178	138	0
0.733348	59.6777			0.733348	85.1777			0.733348	111.428	139	0
0.750015	60.9277			0.750015	76.4277			0.750015	116.428	140	0
0.766682	52.1777			0.766682	91.4277			0.766682	115.178	141	0
0.783349	60.9277			0.783349	81.4277			0.783349	112.678	142	0
0.800016	48.4277			0.800016	92.6777			0.800016	135.178	143	0
0.816683	50.9277			0.816683	87.6777			0.816683	123.928	144	0
0.83335	49.6777			0.83335	92.6777			0.83335	121.428
0.850017	47.1777			0.850017	91.4277			0.850017	111.428
0.866684	49.6777			0.866684	85.1777			0.866684	110.178
0.883351	53.4277			0.883351	97.6777			0.883351	110.178
0.900018	64.6777			0.900018	101.428			0.900018	101.428
0.916685	59.6777			0.916685	97.6777			0.916685	118.928
0.933352	65.9277			0.933352	88.9277			0.933352	110.178
0.950019	67.1777			0.950019	85.1777			0.950019	113.928
0.966686	53.4277			0.966686	91.4277			0.966686	101.428
0.983353	55.9277			0.983353	96.4277			0.983353	118.928
1.00002	49.6777			1.00002	92.6777			1.00002	113.928
1.01669	58.4277			1.01669	93.9277			1.01669	112.678
1.03335	58.4277			1.03335	88.9277			1.03335	110.178
1.05002	55.9277			1.05002	92.6777			1.05002	116.428
1.06669	57.1777			1.06669	90.1777			1.06669	126.428
1.08336	52.1777			1.08336	95.1777			1.08336	118.928
1.10002	52.1777			1.10002	92.6777			1.10002	120.178
1.11669	54.6777			1.11669	87.6777			1.11669	125.178
1.13336	57.1777			1.13336	97.6777			1.13336	118.928
1.15002	57.1777			1.15002	96.4277			1.15002	110.178
1.16669	60.9277			1.16669	90.1777			1.16669	120.178
1.18336	49.6777			1.18336	85.1777			1.18336	113.928
1.20002	50.9277			1.20002	77.6777			1.20002	110.178
1.21669	55.9277			1.21669	85.1777			1.21669	118.928
1.23336	57.1777			1.23336	82.6777			1.23336	115.178
1.25003	54.6777			1.25003	86.4277			1.25003	106.428
1.26669	52.1777			1.26669	81.4277			1.26669	115.178
1.28336	58.4277			1.28336	86.4277			1.28336	113.928
1.30003	57.1777			1.30003	90.1777			1.30003	115.178
1.31669	54.6777			1.31669	90.1777			1.31669	107.678
1.33336	54.6777			1.33336	90.1777			1.33336	112.678
1.35003	57.1777			1.35003	93.9277			1.35003	115.178
1.36669	57.1777			1.36669	95.1777			1.36669	107.678
1.38336	54.6777			1.38336	91.4277			1.38336	118.928
1.40003	54.6777			1.40003	85.1777			1.40003	116.428
1.4167	59.6777			1.4167	92.6777			1.4167	111.428
1.43336	55.9277			1.43336	92.6777			1.43336	107.678
1.45003	58.4277			1.45003	90.1777			1.45003	108.928
1.4667	59.6777			1.4667	91.4277			1.4667	118.928
1.48336	53.4277			1.48336	100.178			1.48336	117.678
1.50003	58.4277			1.50003	88.9277			1.50003	115.178
1.5167	55.9277			1.5167	95.1777			1.5167	117.678
1.53336	50.9277			1.53336	90.1777			1.53336	126.428
1.55003	54.6777			1.55003	93.9277			1.55003	120.178
1.5667	59.6777			1.5667	88.9277			1.5667	120.178
1.58337	54.6777			1.58337	92.6777			1.58337	125.178
1.60003	49.6777			1.60003	101.428			1.60003	118.928
1.6167	58.4277			1.6167	91.4277			1.6167	115.178
1.63337	57.1777			1.63337	93.9277			1.63337	121.428
1.65003	55.9277			1.65003	91.4277			1.65003	110.178
1.6667	63.4277			1.6667	92.6777			1.6667	120.178
1.68337	58.4277			1.68337	86.4277			1.68337	120.178
1.70003	47.1777			1.70003	88.9277			1.70003	122.678
1.7167	53.4277			1.7167	86.4277			1.7167	126.428
1.73337	55.9277			1.73337	87.6777			1.73337	121.428
1.75004	53.4277			1.75004	87.6777			1.75004	126.428
1.7667	47.1777			1.7667	83.9277			1.7667	128.928
1.78337	57.1777			1.78337	78.9277			1.78337	132.678
1.80004	54.6777			1.80004	81.4277			1.80004	127.678
1.8167	52.1777			1.8167	81.4277			1.8167	127.678
1.83337	54.6777			1.83337	91.4277			1.83337	121.428
1.85004	52.1777			1.85004	90.1777			1.85004	123.928
1.8667	48.4277			1.8667	92.6777			1.8667	126.428
1.88337	54.6777			1.88337	100.178			1.88337	120.178
1.90004	53.4277			1.90004	96.4277			1.90004	126.428
1.91671	54.6777			1.91671	91.4277			1.91671	120.178
1.93337	58.4277			1.93337	92.6777			1.93337	125.178
1.95004	53.4277			1.95004	86.4277			1.95004	128.928
1.96671	55.9277			1.96671	87.6777			1.96671	126.428
1.98337	59.6777			1.98337	95.1777			1.98337	125.178
2.00004	44.6777			2.00004	98.9277			2.00004	121.428
2.01671	45.9277			2.01671	95.1777			2.01671	128.928
2.03337	47.1777			2.03337	86.4277			2.03337	126.428
2.05004	54.6777			2.05004	87.6777			2.05004	125.178
2.06671	49.6777			2.06671	100.178			2.06671	122.678
2.08338	49.6777			2.08338	92.6777			2.08338	126.428
2.10004	53.4277			2.10004	85.1777			2.10004	125.178
2.11671	57.1777			2.11671	92.6777			2.11671	122.678
2.13338	53.4277			2.13338	90.1777			2.13338	125.178
2.15004	52.1777			2.15004	97.6777			2.15004	121.428
2.16671	53.4277			2.16671	90.1777			2.16671	128.928
2.18338	57.1777			2.18338	97.6777			2.18338	127.678
2.20004	52.1777			2.20004	95.1777			2.20004	121.428
2.21671	53.4277			2.21671	100.178			2.21671	126.428
2.23338	49.6777			2.23338	92.6777			2.23338	118.928
2.25005	57.1777			2.25005	97.6777			2.25005	126.428
2.26671	48.4277			2.26671	96.4277			2.26671	116.428
2.28338	54.6777			2.28338	98.9277			2.28338	108.928
2.30005	57.1777			2.30005	92.6777			2.30005	118.928
2.31671	50.9277			2.31671	92.6777			2.31671	115.178
2.33338	59.6777			2.33338	97.6777			2.33338	101.428
2.35005	49.6777			2.35005	96.4277			2.35005	101.428
2.36671	50.9277			2.36671	110.178			2.36671	106.428
2.38338	55.9277			2.38338	97.6777			2.38338	96.4277
2.40005	55.9277			2.40005	95.1777			2.40005	110.178
2.41672	50.9277			2.41672	96.4277			2.41672	97.6777
2.43338	45.9277			2.43338	97.6777			2.43338	100.178
2.45005	55.9277			2.45005	103.928			2.45005	103.928
2.46672	55.9277			2.46672	95.1777			2.46672	105.178
2.48338	60.9277			2.48338	97.6777			2.48338	102.678
2.50005	58.4277			2.50005	100.178			2.50005	95.1777
2.51672	67.1777			2.51672	95.1777			2.51672	102.678
2.53338	59.6777			2.53338	98.9277			2.53338	95.1777
2.55005	60.9277			2.55005	96.4277			2.55005	100.178
2.56672	62.1777			2.56672	100.178			2.56672	103.928
2.58339	50.9277			2.58339	98.9277			2.58339	102.678
2.60005	54.6777			2.60005	102.678			2.60005	98.9277
2.61672	47.1777			2.61672	101.428			2.61672	105.178
2.63339	43.4277			2.63339	97.6777			2.63339	97.6777
2.65005	44.6777			2.65005	97.6777			2.65005	102.678
2.66672	50.9277			2.66672	90.1777			2.66672	97.6777
2.68339	49.6777			2.68339	83.9277			2.68339	101.428
2.70005	45.9277			2.70005	83.9277			2.70005	102.678
2.71672	44.6777			2.71672	80.1777			2.71672	96.4277
2.73339	53.4277			2.73339	76.4277			2.73339	98.9277
2.75006	53.4277			2.75006	87.6777			2.75006	97.6777
2.76672	57.1777			2.76672	96.4277			2.76672	102.678
2.78339	53.4277			2.78339	92.6777			2.78339	102.678
2.80006	58.4277			2.80006	87.6777			2.80006	101.428
2.81672	54.6777			2.81672	87.6777			2.81672	96.4277
2.83339	50.9277			2.83339	92.6777			2.83339	106.428
2.85006	55.9277			2.85006	92.6777			2.85006	111.428
2.86672	55.9277			2.86672	92.6777			2.86672	105.178
2.88339	53.4277			2.88339	92.6777			2.88339	107.678
2.90006	57.1777			2.90006	85.1777			2.90006	113.928
2.91673	47.1777			2.91673	91.4277			2.91673	103.928
2.93339	49.6777			2.93339	92.6777			2.93339	102.678
2.95006	53.4277			2.95006	97.6777			2.95006	111.428
2.96673	54.6777			2.96673	87.6777			2.96673	102.678
2.98339	59.6777			2.98339	90.1777			2.98339	111.428
3.00006	54.6777			3.00006	87.6777			3.00006	106.428
3.01673	57.1777			3.01673	82.6777			3.01673	100.178
3.03339	55.9277			3.03339	92.6777			3.03339	110.178
3.05006	57.1777			3.05006	88.9277			3.05006	108.928
3.06673	54.6777			3.06673	92.6777			3.06673	103.928
3.0834	55.9277			3.0834	97.6777			3.0834	105.178
3.10006	60.9277			3.10006	91.4277			3.10006	112.678
3.11673	48.4277			3.11673	98.9277			3.11673	106.428
3.1334	54.6777			3.1334	86.4277			3.1334	111.428
3.15006	54.6777			3.15006	93.9277			3.15006	108.928
3.16673	53.4277			3.16673	97.6777			3.16673	110.178
3.1834	54.6777			3.1834	91.4277			3.1834	107.678
3.20006	54.6777			3.20006	92.6777			3.20006	110.178
3.21673	59.6777			3.21673	96.4277			3.21673	108.928
3.2334	53.4277			3.2334	91.4277			3.2334	102.678
3.25007	54.6777			3.25007	92.6777			3.25007	108.928
3.26673	60.9277			3.26673	92.6777			3.26673	110.178
3.2834	63.4277			3.2834	88.9277			3.2834	106.428
3.30007	62.1777			3.30007	95.1777			3.30007	107.678
3.31673	58.4277			3.31673	90.1777			3.31673	112.678
3.3334	54.6777			3.3334	97.6777			3.3334	106.428
				3.35007	97.6777			3.35007	110.178
				3.36673	92.6777			3.36673	108.928
				3.3834	90.1777			3.3834	115.178
				3.40007	83.9277			3.40007	112.678
				3.41674	92.6777			3.41674	118.928
				3.4334	91.4277			3.4334	107.678
				3.45007	91.4277			3.45007	111.428
				3.46674	98.9277			3.46674	110.178
				3.4834	86.4277			3.4834	121.428
				3.50007	95.1777			3.50007	126.428
				3.51674	91.4277			3.51674	121.428
				3.5334	86.4277			3.5334	126.428
				3.55007	93.9277			3.55007	110.178
				3.56674	90.1777			3.56674	122.678
				3.58341	91.4277			3.58341	128.928
				3.60007	97.6777			3.60007	123.928
				3.61674	91.4277			3.61674	132.678
				3.63341	90.1777			3.63341	127.678
								3.65007	122.678
								3.66674	126.428
								3.68341	123.928
								3.70007	122.678
								3.71674	121.428
								3.73341	115.178
								3.75008	121.428
								3.76674	130.178
								3.78341	123.928
								3.80008	121.428
								3.81674	121.428
								3.83341	118.928
								3.85008	122.678
								3.86674	131.428
								3.88341	127.678
								3.90008	113.928
								3.91675	117.678
								3.93341	121.428
								3.95008	120.178
								3.96675	122.678
								3.98341	112.678
								4.00008	116.428
								4.01675	121.428
								4.03341	120.178
								4.05008	126.428
								4.06675	125.178
								4.08342	127.678
								4.10008	118.928
								4.11675	117.678
								4.13342	107.678
								4.15008	111.428
								4.16675	112.678
								4.18342	117.678
								4.20008	126.428
								4.21675	125.178
								4.23342	112.678
								4.25009	125.178
								4.26675	122.678
								4.28342	105.178
								4.30009	112.678
								4.31675	103.928
								4.33342	108.928
								4.35009	112.678
								4.36675	112.678
								4.38342	110.178
								4.40009	112.678
								4.41676	113.928
								4.43342	118.928
								4.45009	117.678
								4.46676	117.678
								4.48342	121.428
								4.50009	118.928
								4.51676	107.678
								4.53342	106.428
								4.55009	115.178
								4.56676	118.928
								4.58343	116.428
								4.60009	112.678
								4.61676	122.678
								4.63343	113.928
								4.65009	122.678
								4.66676	116.428
								4.68343	118.928
								4.70009	115.178
								4.71676	108.928
								4.73343	125.178
								4.75009	120.178
								4.76676	106.428
								4.78343	112.678
								4.8001	122.678
								4.81676	122.678
								4.83343	131.428
								4.8501	125.178
								4.86676	126.428
								4.88343	127.678
								4.9001	122.678
								4.91677	136.428
								4.93343	128.928
								4.9501	126.428
								4.96677	126.428
								4.98343	127.678
								5.0001	123.928
								5.01677	127.678
								5.03343	122.678
								5.0501	126.428
								5.06677	130.178
								5.08344	125.178
								5.1001	132.678
								5.11677	131.428
								5.13344	137.678
								5.1501	133.928
								5.16677	133.928
								5.18344	130.178
								5.2001	133.928
								5.21677	135.178
								5.23344	135.178
								5.25011	137.678
								5.26677	132.678
								5.28344	133.928
								5.30011	130.178
								5.31677	130.178
								5.33344	135.178
								5.35011	125.178
								5.36677	123.928
								5.38344	122.678
								5.40011	112.678
								5.41678	127.678
								5.43344	116.428
								5.45011	120.178
								5.46678	118.928
								5.48344	111.428
								5.50011	118.928
								5.51678	117.678
								5.53344	115.178
								5.55011	113.928
								5.56678	125.178
								5.58345	123.928
								5.60011	117.678
								5.61678	123.928
								5.63345	118.928
								5.65011	122.678
								5.66678	117.678
								5.68345	123.928
								5.70011	125.178
								5.71678	123.928
								5.73345	135.178
								5.75012	135.178
								5.76678	125.178
								5.78345	130.178
								5.80012	127.678
								5.81678	128.928
								5.83345	130.178
								5.85012	125.178
								5.86678	122.678
								5.88345	121.428
								5.90012	121.428
								5.91679	131.428
								5.93345	125.178
								5.95012	131.428
								5.96679	128.928
								5.98345	132.678
								6.00012	123.928
								6.01679	120.178
								6.03345	126.428
								6.05012	127.678
								6.06679	123.928
								6.08346	127.678
								6.10012	120.178
								6.11679	126.428
								6.13346	120.178
								6.15012	121.428
								6.16679	118.928
								6.18346	120.178
								6.20012	122.678
								6.21679	130.178
								6.23346	116.428
								6.25013	127.678
								6.26679	126.428
								6.28346	126.428
								6.30013	123.928
								6.31679	115.178
								6.33346	125.178
								6.35013	117.678
								6.36679	117.678
								6.38346	121.428
								6.40013	122.678
								6.4168	131.428
								6.43346	122.678
								6.45013	120.178
								6.4668	117.678
								6.48346	118.928
								6.50013	123.928
								6.5168	116.428
								6.53346	122.678
								6.55013	122.678
								6.5668	122.678
								6.58347	116.428
								6.60013	107.678
								6.6168	122.678
								6.63347	111.428
								6.65013	110.178

## Sheet: Fig2-figsupp2a
expE_smth.x	expE_smth.d	fit_expE_smth.x	fit_expE_smth.d	'Peak 0'.x	'Peak 0'.d	'Peak 1'.x	'Peak 1'.d	'Peak 2'.x	'Peak 2'.d	'Peak 3'.x	'Peak 3'.d	'Peak 4'.x	'Peak 4'.d	'Peak 5'.x	'Peak 5'.d	'Peak 6'.x	'Peak 6'.d	'Peak 7'.x	'Peak 7'.d
0	3.835	0	3.89022	0	0.00314392	6.29612	0.000702215	24.4384	2.34129e-12	33.7687	3.08462e-06	52.6135	8.30336e-10	71.7002	1.32009e-06	103.867	0.000574833	141.992	0.0109487
1	3.89773	0.247006	3.88861	0.171528	0.00375061	6.43767	0.000816692	24.5799	4.00674e-12	33.9668	3.95172e-06	52.9107	1.29651e-09	71.9408	1.76209e-06	104.079	0.00067881	142.107	0.0117493
2	3.72467	0.494012	3.88722	0.343057	0.00446101	6.57922	0.000948385	24.7215	6.81979e-12	34.165	5.04992e-06	53.208	2.0153e-09	72.1815	2.34524e-06	104.291	0.000800249	142.223	0.0126022
3	3.67158	0.741018	3.88612	0.514585	0.00529008	6.72077	0.00109963	24.863	1.1545e-11	34.3632	6.43718e-06	53.5052	3.11854e-09	72.4221	3.11229e-06	104.504	0.000941831	142.338	0.0135106
4	3.77252	0.988024	3.88534	0.686114	0.00625448	6.86232	0.00127306	25.0046	1.94383e-11	34.5613	8.18503e-06	53.8025	4.80406e-09	72.6627	4.11818e-06	104.716	0.0011066	142.454	0.0144774
5	4.11742	1.23503	3.88496	0.857642	0.00737257	7.00386	0.00147159	25.1461	3.25512e-11	34.7595	1.03815e-05	54.0997	7.36733e-09	72.9034	5.4333e-06	104.928	0.00129802	142.57	0.0155059
6	4.27438	1.48204	3.88505	1.02917	0.00866456	7.14541	0.00169849	25.2877	5.42149e-11	34.9577	1.31344e-05	54.397	1.12475e-08	73.144	7.14752e-06	105.141	0.00151999	142.685	0.0165993
7	4.23905	1.72904	3.88569	1.2007	0.0101525	7.28696	0.00195739	25.4292	8.98077e-11	35.1558	1.65758e-05	54.6942	1.70942e-08	73.3846	9.37518e-06	105.353	0.00177693	142.801	0.0177613
8	4.26589	1.97605	3.88696	1.37223	0.0118604	7.42851	0.00225231	25.5708	1.47962e-10	35.354	2.08666e-05	54.9915	2.58635e-08	73.6253	1.22613e-05	105.565	0.00207382	142.916	0.0189955
9	4.35127	2.22305	3.88896	1.54376	0.0138142	7.57006	0.00258771	25.7123	2.42456e-10	35.5522	2.62026e-05	55.2887	3.89556e-08	73.8659	1.59892e-05	105.778	0.00241625	143.032	0.0203055
10	4.48434	2.47006	3.89179	1.71528	0.0160416	7.7116	0.00296854	25.8539	3.95145e-10	35.7503	3.28207e-05	55.586	5.84115e-08	74.1065	2.07899e-05	105.99	0.0028105	143.148	0.0216954
11	4.41216	2.71707	3.89557	1.88681	0.0185726	7.85315	0.00340021	25.9954	6.40506e-10	35.9485	4.10078e-05	55.8832	8.7191e-08	74.3471	2.69531e-05	106.202	0.0032636	143.263	0.0231692
12	4.28523	2.96407	3.9004	2.05834	0.0214386	7.9947	0.00388872	26.137	1.0326e-09	36.1467	5.1109e-05	56.1805	1.29566e-07	74.5878	3.48416e-05	106.415	0.00378339	143.379	0.0247311
13	4.18749	3.21108	3.90639	2.22987	0.0246728	8.13625	0.00444063	26.2785	1.65572e-09	36.3448	6.35392e-05	56.4777	1.9167e-07	74.8284	4.49077e-05	106.627	0.00437859	143.495	0.0263856
14	4.37632	3.45808	3.91367	2.4014	0.02831	8.2778	0.00506315	26.4201	2.64048e-09	36.543	7.87951e-05	56.775	2.82269e-07	75.069	5.77135e-05	106.839	0.00505894	143.61	0.028137
15	4.61415	3.70509	3.92234	2.57293	0.0323863	8.41934	0.00576414	26.5616	4.18814e-09	36.7412	9.74698e-05	57.0722	4.13825e-07	75.3097	7.39548e-05	107.052	0.00583519	143.726	0.0299903
16	4.68505	3.9521	3.9325	2.74446	0.0369387	8.56089	0.00655217	26.7031	6.60699e-09	36.9393	0.000120269	57.3695	6.03972e-07	75.5503	9.44905e-05	107.264	0.00671925	143.841	0.0319501
17	4.54155	4.1991	3.94424	2.91598	0.042005	8.70244	0.00743659	26.8447	1.03664e-08	37.1375	0.000148031	57.6667	8.77529e-07	75.7909	0.000120377	107.476	0.00772427	143.957	0.0340214
18	4.54155	4.44611	3.95763	3.08751	0.0476233	8.84399	0.00842751	26.9862	1.6177e-08	37.3357	0.000181745	57.964	1.26926e-06	76.0316	0.000152909	107.689	0.00886471	144.073	0.0362096
19	4.75667	4.69311	3.97272	3.25904	0.0538317	8.98554	0.00953592	27.1278	2.51078e-08	37.5338	0.00022258	58.2612	1.82762e-06	76.2722	0.000193666	107.901	0.0101565	144.188	0.0385197
20	5.13597	4.94012	3.98954	3.43057	0.0606674	9.12708	0.0107737	27.2693	3.87582e-08	37.732	0.000271909	58.5585	2.61979e-06	76.5128	0.000244572	108.113	0.0116169	144.304	0.0409575
21	5.23366	5.18713	4.00809	3.6021	0.0681667	9.26863	0.0121535	27.4109	5.95061e-08	37.9302	0.00033134	58.8557	3.73846e-06	76.7535	0.00030796	108.326	0.0132651	144.42	0.0435284
22	5.03656	5.43413	4.02831	3.77363	0.0763639	9.41018	0.0136892	27.5524	9.08662e-08	38.1284	0.000402753	59.153	5.31085e-06	76.9941	0.000386648	108.538	0.0151217	144.535	0.0462383
23	4.54298	5.68114	4.05015	3.94515	0.085291	9.55173	0.0153954	27.694	1.38002e-07	38.3265	0.000488332	59.4503	7.51069e-06	77.2347	0.000484027	108.75	0.0172092	144.651	0.0490931
24	4.19999	5.92814	4.07347	4.11668	0.0949769	9.69328	0.0172879	27.8355	2.08455e-07	38.5247	0.000590617	59.7475	1.05741e-05	77.4754	0.000604165	108.963	0.019552	144.766	0.0520989
25	4.12823	6.17515	4.09812	4.28821	0.105446	9.83482	0.0193834	27.9771	3.13172e-07	38.7229	0.000712541	60.0448	1.482e-05	77.716	0.000751927	109.175	0.0221765	144.882	0.055262
26	4.12823	6.42216	4.1239	4.45974	0.11672	9.97637	0.0216998	28.1186	4.67946e-07	38.921	0.000857485	60.342	2.06776e-05	77.9566	0.000933101	109.387	0.0251111	144.998	0.0585888
27	4.13571	6.66916	4.15056	4.63127	0.128812	10.1179	0.024256	28.2602	6.95428e-07	39.1192	0.00102934	60.6393	2.87209e-05	78.1973	0.00115455	109.6	0.0283863	145.113	0.0620857
28	3.84418	6.91617	4.17783	4.8028	0.141732	10.2595	0.027072	28.4017	1.0279e-06	39.3174	0.00123254	60.9365	3.97137e-05	78.4379	0.0014244	109.812	0.0320349	145.229	0.0657595
29	3.58717	7.16317	4.20537	4.97433	0.155482	10.401	0.0301688	28.5433	1.5111e-06	39.5155	0.00147217	61.2338	5.46673e-05	78.6785	0.00175221	110.024	0.0360917	145.345	0.0696169
30	3.33489	7.41018	4.23286	5.14585	0.170056	10.5426	0.0335686	28.6848	2.20942e-06	39.7137	0.00175399	61.531	7.49136e-05	78.9192	0.00214917	110.237	0.040594	145.46	0.0736649
31	3.35812	7.65719	4.25991	5.31738	0.185439	10.6841	0.0372947	28.8264	3.21297e-06	39.9119	0.00208454	61.8283	0.000102197	79.1598	0.00262838	110.449	0.0455814	145.576	0.0779106
32	3.51971	7.90419	4.28614	5.48891	0.201609	10.8257	0.0413712	28.9679	4.64706e-06	40.11	0.0024712	62.1255	0.000138791	79.4004	0.00320509	110.661	0.0510957	145.691	0.082361
33	3.77492	8.1512	4.31117	5.66044	0.218533	10.9672	0.0458233	29.1095	6.68487e-06	40.3082	0.00292225	62.4228	0.000187642	79.641	0.00389694	110.873	0.0571809	145.807	0.0870235
34	3.86478	8.3982	4.33462	5.83197	0.23617	11.1088	0.0506771	29.251	9.56423e-06	40.5064	0.003447	62.72	0.000252548	79.8817	0.00472435	111.086	0.0638835	145.923	0.0919055
35	3.8423	8.64521	4.35613	6.0035	0.254467	11.2503	0.0559596	29.3926	1.36098e-05	40.7045	0.00405581	63.0173	0.000338379	80.1223	0.00571074	111.298	0.071252	146.038	0.0970142
36	3.90042	8.89222	4.37537	6.17502	0.273362	11.3919	0.0616986	29.5341	1.92617e-05	40.9027	0.00476023	63.3145	0.000451344	80.3629	0.00688297	111.51	0.079337	146.154	0.102357
37	4.18911	9.13922	4.39205	6.34655	0.292781	11.5334	0.0679225	29.6757	2.71132e-05	41.1009	0.00557302	63.6118	0.000599319	80.6036	0.00827165	111.723	0.0881912	146.269	0.107943
38	4.55506	9.38623	4.40594	6.51808	0.312642	11.6749	0.0746602	29.8172	3.79587e-05	41.299	0.00650829	63.909	0.000792233	80.8442	0.00991156	111.935	0.097869	146.385	0.113777
39	4.62395	9.63323	4.41686	6.68961	0.332852	11.8165	0.0819412	29.9588	5.28547e-05	41.4972	0.00758153	64.2063	0.00104254	81.0848	0.011842	112.147	0.108427	146.501	0.119869
40	4.36546	9.88024	4.4247	6.86114	0.353309	11.958	0.0897952	30.1003	7.31981e-05	41.6954	0.00880967	64.5035	0.00136577	81.3255	0.0141072	112.36	0.119922	146.616	0.126227
41	3.85261	10.1272	4.42943	7.03267	0.373902	12.0996	0.0982519	30.2418	0.000100823	41.8935	0.0102112	64.8008	0.00178118	81.5661	0.0167567	112.572	0.132413	146.732	0.132856
42	3.57136	10.3743	4.43112	7.2042	0.394511	12.2411	0.107341	30.3834	0.000138121	42.0917	0.0118061	65.098	0.00231252	81.8067	0.0198459	112.784	0.145959	146.848	0.139767
43	3.56216	10.6213	4.42988	7.37572	0.415012	12.3827	0.117093	30.5249	0.000188194	42.2899	0.013616	65.3953	0.00298886	82.0474	0.0234362	112.997	0.160622	146.963	0.146965
44	3.61785	10.8683	4.42592	7.54725	0.435272	12.5242	0.127535	30.6665	0.000255032	42.488	0.0156641	65.6925	0.00384567	82.288	0.0275953	113.209	0.176461	147.079	0.15446
45	3.56882	11.1153	4.41955	7.71878	0.455156	12.6658	0.138697	30.808	0.000343736	42.6862	0.0179752	65.9898	0.00492588	82.5286	0.0323978	113.421	0.193537	147.194	0.162258
46	3.40743	11.3623	4.41112	7.89031	0.474525	12.8073	0.150607	30.9496	0.000460787	42.8844	0.0205758	66.287	0.00628117	82.7693	0.0379254	113.634	0.211909	147.31	0.170367
47	3.38423	11.6093	4.40106	8.06184	0.493239	12.9489	0.163289	31.0911	0.000614352	43.0825	0.0234938	66.5843	0.00797338	83.0099	0.0442667	113.846	0.231636	147.426	0.178795
48	3.55197	11.8563	4.38984	8.23337	0.511158	13.0904	0.17677	31.2327	0.000814663	43.2807	0.0267585	66.8815	0.010076	83.2505	0.0515178	114.058	0.252774	147.541	0.187549
49	3.81813	12.1033	4.37799	8.40489	0.528144	13.232	0.191071	31.3742	0.00107444	43.4789	0.0304008	67.1788	0.012676	83.4912	0.0597821	114.271	0.275378	147.657	0.196636
50	4.05831	12.3503	4.36605	8.57642	0.544062	13.3735	0.206215	31.5158	0.00140938	43.677	0.0344525	67.476	0.0158752	83.7318	0.0691699	114.483	0.2995	147.773	0.206064
51	4.0907	12.5973	4.35461	8.74795	0.558783	13.5151	0.222221	31.6573	0.00183873	43.8752	0.0389466	67.7733	0.0197926	83.9724	0.0797989	114.695	0.325189	147.888	0.215839
52	4.0905	12.8443	4.34421	8.91948	0.572187	13.6566	0.239103	31.7989	0.00238589	44.0734	0.0439169	68.0705	0.0245658	84.213	0.091793	114.908	0.352488	148.004	0.225969
53	4.02447	13.0913	4.33543	9.09101	0.584161	13.7982	0.256875	31.9404	0.00307912	44.2715	0.0493978	68.3678	0.0303532	84.4537	0.105282	115.12	0.381439	148.119	0.236459
54	4.02447	13.3383	4.32878	9.26254	0.594601	13.9397	0.275549	32.082	0.00395226	44.4697	0.0554238	68.665	0.0373357	84.6943	0.120402	115.332	0.412074	148.235	0.247316
55	3.95864	13.5853	4.32475	9.43407	0.603418	14.0813	0.295128	32.2235	0.00504553	44.6679	0.0620296	68.9623	0.0457181	84.9349	0.137292	115.545	0.444423	148.351	0.258547
56	3.9031	13.8323	4.32379	9.60559	0.610534	14.2228	0.315618	32.3651	0.00640637	44.866	0.0692491	69.2595	0.055731	85.1756	0.156096	115.757	0.478507	148.466	0.270156
57	3.76018	14.0793	4.32625	9.77712	0.615887	14.3644	0.337015	32.5066	0.00809022	45.0642	0.0771158	69.5568	0.0676319	85.4162	0.176957	115.969	0.51434	148.582	0.282151
58	3.61725	14.3263	4.33244	9.94865	0.619429	14.5059	0.359315	32.6482	0.0101613	45.2624	0.0856614	69.854	0.0817055	85.6568	0.200023	116.182	0.551929	148.698	0.294535
59	3.58875	14.5734	4.34257	10.1202	0.621128	14.6475	0.382506	32.7897	0.0126936	45.4605	0.0949163	70.1513	0.0982645	85.8975	0.225436	116.394	0.591271	148.813	0.307313
60	3.58892	14.8204	4.35678	10.2917	0.620969	14.789	0.406573	32.9313	0.0157711	45.6587	0.104908	70.4485	0.117649	86.1381	0.253339	116.606	0.632355	148.929	0.320491
61	3.52702	15.0674	4.3751	10.4632	0.618954	14.9306	0.431495	33.0728	0.0194887	45.8569	0.115662	70.7458	0.140224	86.3787	0.283865	116.818	0.675159	149.044	0.334072
62	3.35327	15.3144	4.39748	10.6348	0.615101	15.0721	0.457248	33.2144	0.0239523	46.055	0.1272	71.043	0.166381	86.6194	0.317143	117.031	0.719651	149.16	0.34806
63	3.39842	15.5614	4.42379	10.8063	0.609443	15.2137	0.483798	33.3559	0.0292788	46.2532	0.139539	71.3403	0.19653	86.86	0.35329	117.243	0.765787	149.276	0.362458
64	3.55932	15.8084	4.45377	10.9778	0.602031	15.3552	0.511111	33.4975	0.0355961	46.4514	0.152692	71.6375	0.2311	87.1006	0.392411	117.455	0.813513	149.391	0.377269
65	3.86793	16.0554	4.48712	11.1494	0.592932	15.4967	0.539141	33.639	0.0430423	46.6495	0.166668	71.9348	0.270531	87.3413	0.434594	117.668	0.862764	149.507	0.392495
66	3.92162	16.3024	4.52343	11.3209	0.582223	15.6383	0.567843	33.7806	0.0517644	46.8477	0.181468	72.232	0.315267	87.5819	0.479909	117.88	0.913462	149.622	0.408137
67	3.69594	16.5494	4.56223	11.4924	0.569998	15.7798	0.59716	33.9221	0.061917	47.0459	0.197089	72.5293	0.365751	87.8225	0.528406	118.092	0.965515	149.738	0.424198
68	3.3517	16.7964	4.60298	11.6639	0.556361	15.9214	0.627034	34.0636	0.07366	47.244	0.213519	72.8265	0.422413	88.0632	0.580109	118.305	1.01882	149.854	0.440676
69	3.21338	17.0434	4.64507	11.8355	0.541426	16.0629	0.657399	34.2052	0.0871558	47.4422	0.230741	73.1238	0.485663	88.3038	0.635016	118.517	1.07327	149.969	0.457574
70	3.40994	17.2904	4.68789	12.007	0.525317	16.2045	0.688184	34.3467	0.102566	47.6404	0.248729	73.421	0.555876	88.5444	0.693094	118.729	1.12873	150.085	0.474889
71	3.63032	17.5374	4.73075	12.1785	0.508162	16.346	0.719312	34.4883	0.120048	47.8385	0.267449	73.7183	0.633382	88.7851	0.754281	118.942	1.18506	150.201	0.49262
72	3.63032	17.7844	4.77296	12.35	0.490098	16.4876	0.750702	34.6298	0.139749	48.0367	0.28686	74.0155	0.718454	89.0257	0.818478	119.154	1.24212	150.316	0.510767
73	3.52112	18.0314	4.81384	12.5216	0.471262	16.6291	0.782267	34.7714	0.161803	48.2349	0.30691	74.3128	0.811292	89.2663	0.885553	119.366	1.29974	150.432	0.529325
74	3.61388	18.2784	4.85268	12.6931	0.451795	16.7707	0.813918	34.9129	0.186323	48.4331	0.327541	74.61	0.912012	89.5069	0.955333	119.579	1.35775	150.547	0.548292
75	4.02618	18.5254	4.88883	12.8646	0.431837	16.9122	0.845558	35.0545	0.213398	48.6312	0.348685	74.9073	1.02063	89.7476	1.02761	119.791	1.41597	150.663	0.567663
76	4.68141	18.7725	4.92164	13.0362	0.411526	17.0538	0.877089	35.196	0.243084	48.8294	0.370267	75.2046	1.13706	89.9882	1.10213	120.003	1.4742	150.779	0.587434
77	5.30708	19.0195	4.95053	13.2077	0.390998	17.1953	0.908409	35.3376	0.275401	49.0276	0.392201	75.5018	1.26108	90.2288	1.17862	120.216	1.53226	150.894	0.6076
78	5.78429	19.2665	4.97497	13.3792	0.370383	17.3369	0.939413	35.4791	0.310326	49.2257	0.414397	75.7991	1.39235	90.4695	1.25674	120.428	1.58993	151.01	0.628153
79	6.01856	19.5135	4.99447	13.5507	0.349805	17.4784	0.969994	35.6207	0.347788	49.4239	0.436755	76.0963	1.53037	90.7101	1.33614	120.64	1.647	151.126	0.649087
80	6.34498	19.7605	5.00866	13.7223	0.329383	17.62	1.00004	35.7622	0.387662	49.6221	0.459168	76.3936	1.67453	90.9507	1.41641	120.853	1.70326	151.241	0.670394
81	6.71022	20.0075	5.01722	13.8938	0.309225	17.7615	1.02945	35.9038	0.429769	49.8202	0.481526	76.6908	1.82404	91.1914	1.49714	121.065	1.75849	151.357	0.692065
82	7.07546	20.2545	5.01993	14.0653	0.289433	17.9031	1.05811	36.0453	0.47387	50.0184	0.50371	76.9881	1.97797	91.432	1.57785	121.277	1.81246	151.472	0.71409
83	7.07546	20.5015	5.01665	14.2369	0.270098	18.0446	1.08591	36.1869	0.51967	50.2166	0.525599	77.2853	2.13525	91.6726	1.65808	121.49	1.86495	151.588	0.736459
84	6.81134	20.7485	5.00736	14.4084	0.2513	18.1862	1.11274	36.3284	0.566811	50.4147	0.547069	77.5826	2.2947	91.9133	1.7373	121.702	1.91574	151.704	0.759162
85	6.44581	20.9955	4.99209	14.5799	0.233112	18.3277	1.1385	36.47	0.614883	50.6129	0.567993	77.8798	2.45498	92.1539	1.81501	121.914	1.96461	151.819	0.782185
86	6.03642	21.2425	4.971	14.7514	0.215593	18.4693	1.16308	36.6115	0.663421	50.8111	0.588243	78.1771	2.61465	92.3945	1.89067	122.127	2.01135	151.935	0.805516
87	5.54375	21.4895	4.94432	14.923	0.198795	18.6108	1.18637	36.7531	0.711917	51.0092	0.607693	78.4743	2.77221	92.6352	1.96375	122.339	2.05575	152.051	0.829142
88	5.10258	21.7365	4.91233	15.0945	0.182757	18.7524	1.20829	36.8946	0.759823	51.2074	0.626217	78.7716	2.92606	92.8758	2.03371	122.551	2.0976	152.166	0.853047
89	4.88529	21.9835	4.87543	15.266	0.167511	18.8939	1.22874	37.0362	0.806564	51.4056	0.643693	79.0688	3.07457	93.1164	2.10003	122.764	2.13671	152.282	0.877216
90	4.83538	22.2305	4.83405	15.4376	0.153077	19.0354	1.24762	37.1777	0.851546	51.6037	0.660003	79.3661	3.21612	93.3571	2.1622	122.976	2.17289	152.397	0.901633
91	4.95715	22.4775	4.78868	15.6091	0.139469	19.177	1.26487	37.3193	0.894171	51.8019	0.675035	79.6633	3.34908	93.5977	2.21972	123.188	2.20599	152.513	0.926281
92	5.16377	22.7246	4.73984	15.7806	0.12669	19.3185	1.2804	37.4608	0.933847	52.0001	0.688684	79.9606	3.47187	93.8383	2.27213	123.4	2.23582	152.629	0.951142
93	5.28578	22.9716	4.6881	15.9521	0.114738	19.4601	1.29415	37.6023	0.970006	52.1982	0.700853	80.2578	3.583	94.079	2.319	123.613	2.26226	152.744	0.976197
94	5.28602	23.2186	4.63402	16.1237	0.103603	19.6016	1.30605	37.7439	1.00211	52.3964	0.711455	80.5551	3.68108	94.3196	2.35995	123.825	2.28517	152.86	1.00143
95	5.37966	23.4656	4.57818	16.2952	0.0932691	19.7432	1.31605	37.8854	1.02968	52.5946	0.720412	80.8523	3.76486	94.5602	2.39463	124.037	2.30444	152.975	1.02681
96	5.46509	23.7126	4.52116	16.4667	0.0837146	19.8847	1.3241	38.027	1.05227	52.7927	0.727659	81.1496	3.83326	94.8008	2.42273	124.25	2.31998	153.091	1.05233
97	5.39323	23.9596	4.46352	16.6383	0.0749142	20.0263	1.33018	38.1685	1.06955	52.9909	0.733142	81.4468	3.88537	95.0415	2.44403	124.462	2.33169	153.207	1.07796
98	4.99494	24.2066	4.40579	16.8098	0.0668384	20.1678	1.33424	38.3101	1.08122	53.1891	0.73682	81.7441	3.9205	95.2821	2.45833	124.674	2.33954	153.322	1.10368
99	4.65706	24.4536	4.34846	16.9813	0.0594548	20.3094	1.33628	38.4516	1.0871	53.3872	0.738666	82.0413	3.93819	95.5227	2.46551	124.887	2.34347	153.438	1.12946
100	4.28575	24.7006	4.292	17.1528	0.0527288	20.4509	1.33628	38.5932	1.0871	53.5854	0.738666	82.3386	3.93819	95.7634	2.46551	125.099	2.34347	153.554	1.15529
101	3.9546	24.9476	4.23683	17.3244	0.0466238	20.5925	1.33424	38.7347	1.08122	53.7836	0.73682	82.6358	3.9205	96.004	2.45833	125.311	2.33954	153.669	1.18114
102	3.73519	25.1946	4.1833	17.4959	0.0411024	20.734	1.33018	38.8763	1.06955	53.9817	0.733142	82.9331	3.88537	96.2446	2.44403	125.524	2.33169	153.785	1.20698
103	3.54454	25.4416	4.13174	17.6674	0.0361265	20.8756	1.3241	39.0178	1.05227	54.1799	0.727659	83.2303	3.83326	96.4853	2.42273	125.736	2.31998	153.9	1.23279
104	3.35823	25.6886	4.08239	17.839	0.031658	21.0171	1.31605	39.1594	1.02968	54.3781	0.720412	83.5276	3.76486	96.7259	2.39463	125.948	2.30444	154.016	1.25854
105	3.17191	25.9356	4.03548	18.0105	0.0276592	21.1587	1.30605	39.3009	1.00211	54.5762	0.711455	83.8248	3.68108	96.9665	2.35995	126.161	2.28517	154.132	1.2842
106	3.09769	26.1826	3.99115	18.182	0.0240933	21.3002	1.29415	39.4425	0.970006	54.7744	0.700853	84.1221	3.583	97.2072	2.319	126.373	2.26226	154.247	1.30976
107	2.97875	26.4296	3.94951	18.3535	0.0209244	21.4418	1.2804	39.584	0.933847	54.9726	0.688684	84.4193	3.47187	97.4478	2.27213	126.585	2.23582	154.363	1.33517
108	2.90622	26.6766	3.91061	18.5251	0.0181179	21.5833	1.26487	39.7256	0.894171	55.1707	0.675035	84.7166	3.34908	97.6884	2.21972	126.798	2.20599	154.479	1.36042
109	2.90622	26.9237	3.87449	18.6966	0.0156409	21.7249	1.24762	39.8671	0.851546	55.3689	0.660003	85.0138	3.21612	97.9291	2.1622	127.01	2.17289	154.594	1.38548
110	2.90622	27.1707	3.84112	18.8681	0.0134622	21.8664	1.22874	40.0087	0.806564	55.5671	0.643693	85.3111	3.07457	98.1697	2.10003	127.222	2.13671	154.71	1.41031
111	2.90622	27.4177	3.81043	19.0397	0.0115523	22.008	1.20829	40.1502	0.759823	55.7652	0.626217	85.6083	2.92606	98.4103	2.03371	127.435	2.0976	154.825	1.4349
112	2.90622	27.6647	3.78236	19.2112	0.0098837	22.1495	1.18637	40.2918	0.711917	55.9634	0.607693	85.9056	2.77221	98.651	1.96375	127.647	2.05575	154.941	1.45921
113	2.90622	27.9117	3.75678	19.3827	0.00843084	22.2911	1.16308	40.4333	0.663421	56.1616	0.588243	86.2028	2.61465	98.8916	1.89067	127.859	2.01135	155.057	1.4832
114	2.90622	28.1587	3.73359	19.5542	0.00717004	22.4326	1.1385	40.5749	0.614883	56.3597	0.567993	86.5001	2.45498	99.1322	1.81501	128.072	1.96461	155.172	1.50687
115	3.00218	28.4057	3.71263	19.7258	0.00607955	22.5742	1.11274	40.7164	0.566811	56.5579	0.547069	86.7973	2.2947	99.3728	1.7373	128.284	1.91574	155.288	1.53017
116	3.27256	28.6527	3.69376	19.8973	0.0051395	22.7157	1.08591	40.858	0.51967	56.7561	0.525599	87.0946	2.13525	99.6135	1.65808	128.496	1.86495	155.404	1.55307
117	3.49654	28.8997	3.67682	20.0688	0.00433181	22.8572	1.05811	40.9995	0.47387	56.9542	0.50371	87.3918	1.97797	99.8541	1.57785	128.709	1.81246	155.519	1.57556
118	3.69104	29.1467	3.66165	20.2404	0.00364013	22.9988	1.02945	41.1411	0.429769	57.1524	0.481526	87.6891	1.82404	100.095	1.49714	128.921	1.75849	155.635	1.5976
119	3.90426	29.3937	3.6481	20.4119	0.00304975	23.1403	1.00004	41.2826	0.387662	57.3506	0.459168	87.9863	1.67453	100.335	1.41641	129.133	1.70326	155.75	1.61916
120	4.11747	29.6407	3.63602	20.5834	0.00254748	23.2819	0.969994	41.4241	0.347788	57.5487	0.436755	88.2836	1.53037	100.576	1.33614	129.345	1.647	155.866	1.64022
121	4.34652	29.8877	3.62526	20.7549	0.00212156	23.4234	0.939413	41.5657	0.310326	57.7469	0.414397	88.5808	1.39235	100.817	1.25674	129.558	1.58993	155.982	1.66075
122	4.59759	30.1347	3.61569	20.9265	0.00176157	23.565	0.908409	41.7072	0.275401	57.9451	0.392201	88.8781	1.26108	101.057	1.17862	129.77	1.53226	156.097	1.68072
123	4.84867	30.3817	3.60717	21.098	0.00145829	23.7065	0.877089	41.8488	0.243084	58.1433	0.370267	89.1753	1.13706	101.298	1.10213	129.982	1.4742	156.213	1.7001
124	4.91541	30.6287	3.59961	21.2695	0.00120362	23.8481	0.845558	41.9903	0.213398	58.3414	0.348685	89.4726	1.02063	101.539	1.02761	130.195	1.41597	156.328	1.71888
125	4.91517	30.8757	3.59291	21.4411	0.000990447	23.9896	0.813918	42.1319	0.186323	58.5396	0.327541	89.7698	0.912012	101.779	0.955333	130.407	1.35775	156.444	1.73703
126	4.79985	31.1228	3.587	21.6126	0.000812594	24.1312	0.782267	42.2734	0.161803	58.7378	0.30691	90.0671	0.811292	102.02	0.885553	130.619	1.29974	156.56	1.75451
127	4.62792	31.3698	3.58184	21.7841	0.000664683	24.2727	0.750702	42.415	0.139749	58.9359	0.28686	90.3644	0.718454	102.26	0.818478	130.832	1.24212	156.675	1.77131
128	4.51262	31.6168	3.57742	21.9556	0.00054207	24.4143	0.719312	42.5565	0.120048	59.1341	0.267449	90.6616	0.633382	102.501	0.754281	131.044	1.18506	156.791	1.78741
129	4.5124	31.8638	3.57378	22.1272	0.000440753	24.5558	0.688184	42.6981	0.102566	59.3323	0.248729	90.9589	0.555876	102.742	0.693094	131.256	1.12873	156.907	1.80278
130	4.37403	32.1108	3.571	22.2987	0.000357301	24.6974	0.657399	42.8396	0.0871558	59.5304	0.230741	91.2561	0.485663	102.982	0.635016	131.469	1.07327	157.022	1.8174
131	3.96179	32.3578	3.56924	22.4702	0.000288784	24.8389	0.627034	42.9812	0.07366	59.7286	0.213519	91.5534	0.422413	103.223	0.580109	131.681	1.01882	157.138	1.83125
132	3.39521	32.6048	3.56872	22.6418	0.000232708	24.9805	0.59716	43.1227	0.061917	59.9268	0.197089	91.8506	0.365751	103.464	0.528406	131.893	0.965515	157.253	1.84432
133	3.0348	32.8518	3.56976	22.8133	0.00018696	25.122	0.567843	43.2643	0.0517644	60.1249	0.181468	92.1479	0.315267	103.704	0.479909	132.106	0.913462	157.369	1.85658
134	2.83375	33.0988	3.57276	22.9848	0.000149756	25.2636	0.539141	43.4058	0.0430423	60.3231	0.166668	92.4451	0.270531	103.945	0.434594	132.318	0.862764	157.485	1.86801
135	2.74256	33.3458	3.57825	23.1563	0.000119597	25.4051	0.511111	43.5474	0.0355961	60.5213	0.152692	92.7424	0.2311	104.185	0.392411	132.53	0.813513	157.6	1.8786
136	2.6412	33.5928	3.58686	23.3279	9.5226e-05	25.5467	0.483798	43.6889	0.0292788	60.7194	0.139539	93.0396	0.19653	104.426	0.35329	132.743	0.765787	157.716	1.88834
137	2.55435	33.8398	3.59931	23.4994	7.55944e-05	25.6882	0.457248	43.8305	0.0239523	60.9176	0.1272	93.3369	0.166381	104.667	0.317143	132.955	0.719651	157.832	1.89722
138	2.55926	34.0868	3.61641	23.6709	5.98306e-05	25.8298	0.431495	43.972	0.0194887	61.1158	0.115662	93.6341	0.140224	104.907	0.283865	133.167	0.675159	157.947	1.90521
139	2.64046	34.3338	3.63898	23.8425	4.72124e-05	25.9713	0.406573	44.1136	0.0157711	61.3139	0.104908	93.9314	0.117649	105.148	0.253339	133.38	0.632355	158.063	1.9123
140	2.73573	34.5808	3.66787	24.014	3.7144e-05	26.1129	0.382506	44.2551	0.0126936	61.5121	0.0949163	94.2286	0.0982645	105.389	0.225436	133.592	0.591271	158.178	1.9185
141	2.80564	34.8278	3.70382	24.1855	2.91353e-05	26.2544	0.359315	44.3967	0.0101613	61.7103	0.0856614	94.5259	0.0817055	105.629	0.200023	133.804	0.551929	158.294	1.92378
142	2.85353	35.0749	3.74742	24.357	2.27851e-05	26.396	0.337015	44.5382	0.00809022	61.9084	0.0771158	94.8231	0.0676319	105.87	0.176957	134.017	0.51434	158.41	1.92814
143	2.80189	35.3219	3.799	24.5286	1.77656e-05	26.5375	0.315618	44.6798	0.00640637	62.1066	0.0692491	95.1204	0.055731	106.111	0.156096	134.229	0.478507	158.525	1.93157
144	2.70628	35.5689	3.85852	24.7001	1.38105e-05	26.679	0.295128	44.8213	0.00504553	62.3048	0.0620296	95.4176	0.0457181	106.351	0.137292	134.441	0.444423	158.641	1.93408
145	2.53862	35.8159	3.92554	24.8716	1.07038e-05	26.8206	0.275549	44.9628	0.00395226	62.5029	0.0554238	95.7149	0.0373357	106.592	0.120402	134.654	0.412074	158.756	1.93565
146	2.42068	36.0629	3.99909	25.0432	8.27116e-06	26.9621	0.256875	45.1044	0.00307912	62.7011	0.0493978	96.0121	0.0303532	106.832	0.105282	134.866	0.381439	158.872	1.93628
147	2.34438	36.3099	4.07767	25.2147	6.37226e-06	27.1037	0.239103	45.2459	0.00238589	62.8993	0.0439169	96.3094	0.0245658	107.073	0.091793	135.078	0.352488	158.988	1.93598
148	2.40364	36.5569	4.15924	25.3862	4.89463e-06	27.2452	0.222221	45.3875	0.00183873	63.0974	0.0389466	96.6066	0.0197926	107.314	0.0797989	135.291	0.325189	159.103	1.93474
149	2.54299	36.8039	4.24128	25.5577	3.7484e-06	27.3868	0.206215	45.529	0.00140938	63.2956	0.0344525	96.9039	0.0158752	107.554	0.0691699	135.503	0.2995	159.219	1.93256
150	2.73263	37.0509	4.32091	25.7293	2.86201e-06	27.5283	0.191071	45.6706	0.00107444	63.4938	0.0304008	97.2011	0.012676	107.795	0.0597821	135.715	0.275378	159.335	1.92945
151	2.98928	37.2979	4.39499	25.9008	2.17869e-06	27.6699	0.17677	45.8121	0.000814663	63.6919	0.0267585	97.4984	0.010076	108.036	0.0515178	135.927	0.252774	159.45	1.92541
152	3.24922	37.5449	4.4604	26.0723	1.65356e-06	27.8114	0.163289	45.9537	0.000614352	63.8901	0.0234938	97.7956	0.00797338	108.276	0.0442667	136.14	0.231636	159.566	1.92045
153	3.44166	37.7919	4.51414	26.2439	1.25124e-06	27.953	0.150607	46.0952	0.000460787	64.0883	0.0205758	98.0929	0.00628117	108.517	0.0379254	136.352	0.211909	159.681	1.91458
154	3.58617	38.0389	4.55364	26.4154	9.43982e-07	28.0945	0.138697	46.2368	0.000343736	64.2864	0.0179752	98.3901	0.00492588	108.757	0.0323978	136.564	0.193537	159.797	1.90779
155	3.7659	38.2859	4.57691	26.5869	7.10044e-07	28.2361	0.127535	46.3783	0.000255032	64.4846	0.0156641	98.6874	0.00384567	108.998	0.0275953	136.777	0.176461	159.913	1.90012
156	4.07344	38.5329	4.58271	26.7584	5.32483e-07	28.3776	0.117093	46.5199	0.000188194	64.6828	0.013616	98.9846	0.00298886	109.239	0.0234362	136.989	0.160622	160.028	1.89155
157	4.25981	38.7799	4.57064	26.93	3.98131e-07	28.5192	0.107341	46.6614	0.000138121	64.8809	0.0118061	99.2819	0.00231252	109.479	0.0198459	137.201	0.145959	160.144	1.88212
158	4.26	39.0269	4.54118	27.1015	2.96787e-07	28.6607	0.0982519	46.803	0.000100823	65.0791	0.0102112	99.5791	0.00178118	109.72	0.0167567	137.414	0.132413	160.26	1.87182
159	4.12998	39.274	4.49565	27.273	2.20579e-07	28.8023	0.0897952	46.9445	7.31981e-05	65.2773	0.00880967	99.8764	0.00136577	109.961	0.0141072	137.626	0.119922	160.375	1.86068
160	3.93004	39.521	4.43612	27.4446	1.63449e-07	28.9438	0.0819412	47.0861	5.28547e-05	65.4754	0.00758153	100.174	0.00104254	110.201	0.011842	137.838	0.108427	160.491	1.84871
161	3.82603	39.768	4.36523	27.6161	1.20753e-07	29.0854	0.0746602	47.2276	3.79587e-05	65.6736	0.00650829	100.471	0.000792233	110.442	0.00991156	138.051	0.097869	160.606	1.83592
162	3.77695	40.015	4.28598	27.7876	8.89438e-08	29.2269	0.0679225	47.3692	2.71132e-05	65.8718	0.00557302	100.768	0.000599319	110.683	0.00827165	138.263	0.0881912	160.722	1.82234
163	3.80531	40.262	4.20154	27.9591	6.53178e-08	29.3685	0.0616986	47.5107	1.92617e-05	66.0699	0.00476023	101.065	0.000451344	110.923	0.00688297	138.475	0.079337	160.838	1.80799
164	3.44595	40.509	4.11505	28.1307	4.78241e-08	29.51	0.0559596	47.6523	1.36098e-05	66.2681	0.00405581	101.363	0.000338379	111.164	0.00571074	138.688	0.071252	160.953	1.79288
165	3.39102	40.756	4.02937	28.3022	3.49109e-08	29.6516	0.0506771	47.7938	9.56423e-06	66.4663	0.003447	101.66	0.000252548	111.404	0.00472435	138.9	0.0638835	161.069	1.77703
		41.003	3.94703	28.4737	2.54083e-08	29.7931	0.0458233	47.9354	6.68487e-06	66.6644	0.00292225	101.957	0.000187642	111.645	0.00389694	139.112	0.0571809	161.185	1.76048
		41.25	3.87003	28.6453	1.84369e-08	29.9347	0.0413712	48.0769	4.64706e-06	66.8626	0.0024712	102.254	0.000138791	111.886	0.00320509	139.325	0.0510957	161.3	1.74323
		41.497	3.79985	28.8168	1.33383e-08	30.0762	0.0372947	48.2185	3.21297e-06	67.0608	0.00208454	102.552	0.000102197	112.126	0.00262838	139.537	0.0455814	161.416	1.72531
		41.744	3.73745	28.9883	9.62081e-09	30.2177	0.0335686	48.36	2.20942e-06	67.2589	0.00175399	102.849	7.49136e-05	112.367	0.00214917	139.749	0.040594	161.531	1.70676
		41.991	3.68327	29.1598	6.91867e-09	30.3593	0.0301688	48.5016	1.5111e-06	67.4571	0.00147217	103.146	5.46673e-05	112.608	0.00175221	139.962	0.0360917	161.647	1.68758
		42.238	3.63734	29.3314	4.96058e-09	30.5008	0.027072	48.6431	1.0279e-06	67.6553	0.00123254	103.443	3.97137e-05	112.848	0.0014244	140.174	0.0320349	161.763	1.66781
		42.485	3.59935	29.5029	3.54603e-09	30.6424	0.024256	48.7846	6.95428e-07	67.8534	0.00102934	103.741	2.87209e-05	113.089	0.00115455	140.386	0.0283863	161.878	1.64748
		42.732	3.56872	29.6744	2.52726e-09	30.7839	0.0216998	48.9262	4.67946e-07	68.0516	0.000857485	104.038	2.06776e-05	113.329	0.000933101	140.599	0.0251111	161.994	1.6266
		42.979	3.54475	29.846	1.7958e-09	30.9255	0.0193834	49.0677	3.13172e-07	68.2498	0.000712541	104.335	1.482e-05	113.57	0.000751927	140.811	0.0221765	162.109	1.60521
		43.226	3.52663	30.0175	1.27223e-09	31.067	0.0172879	49.2093	2.08455e-07	68.448	0.000590617	104.632	1.05741e-05	113.811	0.000604165	141.023	0.019552	162.225	1.58334
		43.4731	3.51358	30.189	8.98612e-10	31.2086	0.0153954	49.3508	1.38002e-07	68.6461	0.000488332	104.93	7.51069e-06	114.051	0.000484027	141.236	0.0172092	162.341	1.561
		43.7201	3.50483	30.3605	6.32817e-10	31.3501	0.0136892	49.4924	9.08662e-08	68.8443	0.000402753	105.227	5.31085e-06	114.292	0.000386648	141.448	0.0151217	162.456	1.53824
		43.9671	3.49972	30.5321	4.44307e-10	31.4917	0.0121535	49.6339	5.95061e-08	69.0425	0.00033134	105.524	3.73846e-06	114.533	0.00030796	141.66	0.0132651	162.572	1.51507
		44.2141	3.49766	30.7036	3.1102e-10	31.6332	0.0107737	49.7755	3.87582e-08	69.2406	0.000271909	105.821	2.61979e-06	114.773	0.000244572	141.873	0.0116169	162.688	1.49154
		44.4611	3.49818	30.8751	2.17066e-10	31.7748	0.00953592	49.917	2.51078e-08	69.4388	0.00022258	106.119	1.82762e-06	115.014	0.000193666	142.085	0.0101565	162.803	1.46765
		44.7081	3.5009	31.0467	1.51041e-10	31.9163	0.00842751	50.0586	1.6177e-08	69.637	0.000181745	106.416	1.26926e-06	115.255	0.000152909	142.297	0.00886471	162.919	1.44345
		44.9551	3.50553	31.2182	1.04784e-10	32.0579	0.00743659	50.2001	1.03664e-08	69.8351	0.000148031	106.713	8.77529e-07	115.495	0.000120377	142.509	0.00772427	163.034	1.41896
		45.2021	3.51188	31.3897	7.24767e-11	32.1994	0.00655217	50.3417	6.60699e-09	70.0333	0.000120269	107.01	6.03972e-07	115.736	9.44905e-05	142.722	0.00671925	163.15	1.39421
		45.4491	3.51979	31.5612	4.99804e-11	32.341	0.00576414	50.4832	4.18814e-09	70.2315	9.74698e-05	107.308	4.13825e-07	115.976	7.39548e-05	142.934	0.00583519	163.266	1.36923
		45.6961	3.52917	31.7328	3.43637e-11	32.4825	0.00506315	50.6248	2.64048e-09	70.4296	7.87951e-05	107.605	2.82269e-07	116.217	5.77135e-05	143.146	0.00505894	163.381	1.34404
		45.9431	3.53997	31.9043	2.35559e-11	32.6241	0.00444063	50.7663	1.65572e-09	70.6278	6.35392e-05	107.902	1.9167e-07	116.458	4.49077e-05	143.359	0.00437859	163.497	1.31868
		46.1901	3.55214	32.0758	1.6099e-11	32.7656	0.00388872	50.9079	1.0326e-09	70.826	5.1109e-05	108.199	1.29566e-07	116.698	3.48416e-05	143.571	0.00378339	163.613	1.29317
		46.4371	3.56566	32.2474	1.09697e-11	32.9072	0.00340021	51.0494	6.40506e-10	71.0241	4.10078e-05	108.497	8.7191e-08	116.939	2.69531e-05	143.783	0.0032636	163.728	1.26754
		46.6841	3.58052	32.4189	7.45235e-12	33.0487	0.00296854	51.191	3.95145e-10	71.2223	3.28207e-05	108.794	5.84115e-08	117.18	2.07899e-05	143.996	0.0028105	163.844	1.24182
		46.9311	3.5967	32.5904	5.04766e-12	33.1903	0.00258771	51.3325	2.42456e-10	71.4205	2.62026e-05	109.091	3.89556e-08	117.42	1.59892e-05	144.208	0.00241625	163.959	1.21603
		47.1781	3.61417	32.7619	3.40868e-12	33.3318	0.00225231	51.4741	1.47962e-10	71.6186	2.08666e-05	109.388	2.58635e-08	117.661	1.22613e-05	144.42	0.00207382	164.075	1.1902
		47.4251	3.6329	32.9335	2.29499e-12	33.4734	0.00195739	51.6156	8.98077e-11	71.8168	1.65758e-05	109.686	1.70942e-08	117.901	9.37518e-06	144.633	0.00177693	164.191	1.16435
		47.6722	3.65282	33.105	1.54055e-12	33.6149	0.00169849	51.7572	5.42149e-11	72.015	1.31344e-05	109.983	1.12475e-08	118.142	7.14752e-06	144.845	0.00151999	164.306	1.13851
		47.9192	3.67388	33.2765	1.03102e-12	33.7565	0.00147159	51.8987	3.25512e-11	72.2131	1.03815e-05	110.28	7.36733e-09	118.383	5.4333e-06	145.057	0.00129802	164.422	1.11271
		48.1662	3.69598	33.4481	6.87958e-13	33.898	0.00127306	52.0403	1.94383e-11	72.4113	8.18503e-06	110.577	4.80406e-09	118.623	4.11818e-06	145.27	0.0011066	164.538	1.08696
		48.4132	3.71902	33.6196	4.57672e-13	34.0395	0.00109963	52.1818	1.1545e-11	72.6095	6.43718e-06	110.875	3.11854e-09	118.864	3.11229e-06	145.482	0.000941831	164.653	1.0613
		48.6602	3.74287	33.7911	3.03561e-13	34.1811	0.000948385	52.3233	6.81979e-12	72.8076	5.04992e-06	111.172	2.0153e-09	119.105	2.34524e-06	145.694	0.000800249	164.769	1.03574
		48.9072	3.76738	33.9626	2.00741e-13	34.3226	0.000816692	52.4649	4.00674e-12	73.0058	3.95172e-06	111.469	1.29651e-09	119.345	1.76209e-06	145.907	0.00067881	164.884	1.01031
		49.1542	3.79238	34.1342	1.32351e-13	34.4642	0.000702215	52.6064	2.34129e-12	73.204	3.08462e-06	111.766	8.30336e-10	119.586	1.32009e-06	146.119	0.000574833	165	0.985019
		49.4012	3.81769
		49.6482	3.84311
		49.8952	3.86841
		50.1422	3.89338
		50.3892	3.91777
		50.6362	3.94133
		50.8832	3.96382
		51.1302	3.985
		51.3772	4.00462
		51.6243	4.02246
		51.8713	4.0383
		52.1183	4.05193
		52.3653	4.06319
		52.6123	4.0719
		52.8593	4.07795
		53.1063	4.08124
		53.3533	4.0817
		53.6003	4.07929
		53.8473	4.07402
		54.0943	4.06591
		54.3413	4.05503
		54.5883	4.04148
		54.8353	4.02538
		55.0823	4.00689
		55.3293	3.98618
		55.5763	3.96346
		55.8234	3.93893
		56.0704	3.91282
		56.3174	3.88539
		56.5644	3.85686
		56.8114	3.82749
		57.0584	3.79753
		57.3054	3.76721
		57.5524	3.73676
		57.7994	3.70639
		58.0464	3.67633
		58.2934	3.64674
		58.5404	3.6178
		58.7874	3.58966
		59.0344	3.56244
		59.2814	3.53626
		59.5284	3.51121
		59.7754	3.48736
		60.0225	3.46477
		60.2695	3.44349
		60.5165	3.42359
		60.7635	3.40514
		61.0105	3.38827
		61.2575	3.37319
		61.5045	3.36026
		61.7515	3.35
		61.9985	3.34317
		62.2455	3.34085
		62.4925	3.34436
		62.7395	3.35528
		62.9865	3.37527
		63.2335	3.40582
		63.4805	3.44796
		63.7275	3.50182
		63.9746	3.56629
		64.2216	3.63875
		64.4686	3.71503
		64.7156	3.78965
		64.9626	3.85635
		65.2096	3.90885
		65.4566	3.94179
		65.7036	3.95151
		65.9506	3.93672
		66.1976	3.89862
		66.4446	3.84079
		66.6916	3.76856
		66.9386	3.68817
		67.1856	3.60591
		67.4326	3.52729
		67.6796	3.45655
		67.9266	3.39635
		68.1737	3.34789
		68.4207	3.31108
		68.6677	3.28499
		68.9147	3.26815
		69.1617	3.25898
		69.4087	3.25598
		69.6557	3.2579
		69.9027	3.26376
		70.1497	3.27293
		70.3967	3.28501
		70.6437	3.29983
		70.8907	3.31735
		71.1377	3.33766
		71.3847	3.36092
		71.6317	3.38733
		71.8787	3.41711
		72.1257	3.45051
		72.3728	3.48778
		72.6198	3.52916
		72.8668	3.57489
		73.1138	3.62522
		73.3608	3.68034
		73.6078	3.74046
		73.8548	3.80574
		74.1018	3.87632
		74.3488	3.9523
		74.5958	4.03372
		74.8428	4.12061
		75.0898	4.21291
		75.3368	4.31053
		75.5838	4.41331
		75.8308	4.52101
		76.0778	4.63335
		76.3249	4.74996
		76.5719	4.87042
		76.8189	4.99421
		77.0659	5.12078
		77.3129	5.24947
		77.5599	5.37961
		77.8069	5.51042
		78.0539	5.6411
		78.3009	5.77081
		78.5479	5.89866
		78.7949	6.02375
		79.0419	6.14514
		79.2889	6.26191
		79.5359	6.37316
		79.7829	6.47797
		80.0299	6.5755
		80.2769	6.66493
		80.524	6.7455
		80.771	6.81653
		81.018	6.87743
		81.265	6.92767
		81.512	6.96685
		81.759	6.99467
		82.006	7.01094
		82.253	7.01559
		82.5	7.00867
		82.747	6.99036
		82.994	6.96095
		83.241	6.92084
		83.488	6.87058
		83.735	6.81078
		83.982	6.74217
		84.229	6.66557
		84.476	6.58188
		84.7231	6.49206
		84.9701	6.39712
		85.2171	6.29813
		85.4641	6.19616
		85.7111	6.09232
		85.9581	5.98769
		86.2051	5.88336
		86.4521	5.78037
		86.6991	5.67975
		86.9461	5.58244
		87.1931	5.48935
		87.4401	5.40129
		87.6871	5.319
		87.9341	5.24313
		88.1811	5.17423
		88.4281	5.11276
		88.6751	5.05906
		88.9222	5.01337
		89.1692	4.97583
		89.4162	4.94645
		89.6632	4.92517
		89.9102	4.91179
		90.1572	4.90604
		90.4042	4.90755
		90.6512	4.91585
		90.8982	4.93042
		91.1452	4.95065
		91.3922	4.97585
		91.6392	5.00532
		91.8862	5.03828
		92.1332	5.07394
		92.3802	5.11147
		92.6272	5.15004
		92.8743	5.18882
		93.1213	5.22699
		93.3683	5.26374
		93.6153	5.2983
		93.8623	5.32993
		94.1093	5.35796
		94.3563	5.38173
		94.6033	5.40069
		94.8503	5.41435
		95.0973	5.42226
		95.3443	5.42408
		95.5913	5.41954
		95.8383	5.40847
		96.0853	5.39074
		96.3323	5.36634
		96.5793	5.33533
		96.8263	5.29783
		97.0734	5.25406
		97.3204	5.20427
		97.5674	5.14882
		97.8144	5.08808
		98.0614	5.02249
		98.3084	4.95252
		98.5554	4.87869
		98.8024	4.80152
		99.0494	4.72156
		99.2964	4.63937
		99.5434	4.5555
		99.7904	4.47051
		100.037	4.38493
		100.284	4.29927
		100.531	4.21404
		100.778	4.12969
		101.025	4.04666
		101.272	3.96532
		101.519	3.88604
		101.766	3.80913
		102.013	3.73485
		102.26	3.66344
		102.507	3.59507
		102.754	3.52989
		103.001	3.468
		103.249	3.40948
		103.496	3.35435
		103.743	3.30261
		103.99	3.25424
		104.237	3.20918
		104.484	3.16736
		104.731	3.12868
		104.978	3.09302
		105.225	3.06027
		105.472	3.0303
		105.719	3.00295
		105.966	2.97808
		106.213	2.95556
		106.46	2.93524
		106.707	2.91696
		106.954	2.9006
		107.201	2.88603
		107.448	2.87311
		107.695	2.86174
		107.942	2.85181
		108.189	2.84323
		108.436	2.8359
		108.683	2.82977
		108.93	2.82476
		109.177	2.82083
		109.424	2.81794
		109.671	2.81606
		109.918	2.81518
		110.165	2.81529
		110.412	2.8164
		110.659	2.81852
		110.906	2.82169
		111.153	2.82593
		111.4	2.83129
		111.647	2.83782
		111.894	2.84558
		112.141	2.85464
		112.388	2.86507
		112.635	2.87694
		112.882	2.89034
		113.129	2.90534
		113.376	2.92204
		113.623	2.94051
		113.87	2.96085
		114.117	2.98313
		114.364	3.00744
		114.611	3.03385
		114.858	3.06243
		115.105	3.09325
		115.352	3.12635
		115.599	3.16179
		115.846	3.19958
		116.093	3.23976
		116.34	3.28231
		116.587	3.32722
		116.834	3.37447
		117.081	3.42401
		117.328	3.47575
		117.575	3.52961
		117.822	3.58548
		118.069	3.64322
		118.316	3.70267
		118.563	3.76366
		118.81	3.82598
		119.057	3.8894
		119.304	3.95369
		119.551	4.01857
		119.798	4.08377
		120.045	4.14899
		120.292	4.21391
		120.539	4.2782
		120.786	4.34154
		121.033	4.40356
		121.28	4.46394
		121.527	4.52231
		121.774	4.57832
		122.021	4.63164
		122.268	4.68193
		122.515	4.72886
		122.762	4.77213
		123.009	4.81145
		123.256	4.84654
		123.503	4.87717
		123.75	4.90311
		123.997	4.92417
		124.244	4.9402
		124.491	4.95107
		124.738	4.95668
		124.985	4.957
		125.232	4.95199
		125.479	4.94167
		125.726	4.9261
		125.973	4.90536
		126.22	4.87958
		126.467	4.84891
		126.714	4.81354
		126.961	4.77369
		127.208	4.7296
		127.455	4.68153
		127.702	4.62979
		127.949	4.57467
		128.196	4.5165
		128.443	4.45561
		128.69	4.39234
		128.937	4.32705
		129.184	4.26008
		129.431	4.19179
		129.678	4.12251
		129.925	4.05258
		130.172	3.98234
		130.419	3.91209
		130.666	3.84214
		130.913	3.77277
		131.16	3.70425
		131.407	3.63682
		131.654	3.5707
		131.901	3.50611
		132.148	3.44322
		132.395	3.38219
		132.642	3.32316
		132.889	3.26624
		133.136	3.21152
		133.383	3.15909
		133.63	3.10898
		133.877	3.06123
		134.124	3.01586
		134.371	2.97286
		134.618	2.93222
		134.865	2.89391
		135.112	2.85789
		135.359	2.82411
		135.606	2.79251
		135.853	2.76305
		136.1	2.73566
		136.347	2.71031
		136.594	2.68698
		136.841	2.6657
		137.088	2.64652
		137.335	2.62959
		137.582	2.61511
		137.829	2.6034
		138.076	2.59487
		138.323	2.59002
		138.57	2.5894
		138.817	2.59358
		139.064	2.60307
		139.311	2.61821
		139.558	2.63906
		139.805	2.66529
		140.052	2.69613
		140.299	2.73028
		140.546	2.76596
		140.793	2.80098
		141.04	2.83295
		141.287	2.85945
		141.534	2.87831
		141.781	2.88788
		142.028	2.88717
		142.275	2.87604
		142.522	2.85514
		142.769	2.82592
		143.016	2.79038
		143.263	2.75085
		143.51	2.70976
		143.757	2.66938
		144.004	2.63166
		144.251	2.59805
		144.499	2.56953
		144.746	2.54654
		144.993	2.52916
		145.24	2.51711
		145.487	2.50992
		145.734	2.50703
		145.981	2.50785
		146.228	2.51183
		146.475	2.51851
		146.722	2.52753
		146.969	2.53862
		147.216	2.5516
		147.463	2.56635
		147.71	2.58282
		147.957	2.601
		148.204	2.6209
		148.451	2.64254
		148.698	2.66596
		148.945	2.6912
		149.192	2.71829
		149.439	2.74726
		149.686	2.77814
		149.933	2.81092
		150.18	2.84561
		150.427	2.8822
		150.674	2.92065
		150.921	2.96092
		151.168	3.00296
		151.415	3.04668
		151.662	3.09199
		151.909	3.1388
		152.156	3.18695
		152.403	3.23632
		152.65	3.28674
		152.897	3.33802
		153.144	3.38998
		153.391	3.44241
		153.638	3.49507
		153.885	3.54773
		154.132	3.60015
		154.379	3.65205
		154.626	3.70318
		154.873	3.75327
		155.12	3.80202
		155.367	3.84918
		155.614	3.89446
		155.861	3.93759
		156.108	3.9783
		156.355	4.01634
		156.602	4.05146
		156.849	4.08342
		157.096	4.11203
		157.343	4.13706
		157.59	4.15836
		157.837	4.17576
		158.084	4.18914
		158.331	4.19839
		158.578	4.20344
		158.825	4.20423
		159.072	4.20074
		159.319	4.19298
		159.566	4.18099
		159.813	4.16482
		160.06	4.14456
		160.307	4.12034
		160.554	4.09229
		160.801	4.06058
		161.048	4.02539
		161.295	3.98694
		161.542	3.94543
		161.789	3.90111
		162.036	3.85424
		162.283	3.80506
		162.53	3.75386
		162.777	3.70091
		163.024	3.64648
		163.271	3.59085
		163.518	3.5343
		163.765	3.4771
		164.012	3.4195
		164.259	3.36177
		164.506	3.30416
		164.753	3.24688
		165	3.19016

## Sheet: Fig2-figsupp2b_top
FigS1b_ex.x	FigS1b_ex.d	FigS1b_dwellHisto.x	FigS1b_dwellHisto.d
0	-6.59091	0	68
0.016667	-0.340909	3.4	120
0.033334	-5.34091	6.8	98
0.050001	-2.84091	10.2	147
0.066668	3.40909	13.6	101
0.083335	-0.340909	17	203
0.100002	-2.84091	20.4	268
0.116669	2.15909	23.8	202
0.133336	-2.84091	27.2	85
0.150003	-0.340909	30.6	76
0.16667	-1.59091	34	25
0.183337	-2.84091	37.4	16
0.200004	0.909091	40.8	35
0.216671	-1.59091	44.2	35
0.233338	2.15909	47.6	58
0.250005	2.15909	51	61
0.266672	4.65909	54.4	176
0.283339	-6.59091	57.8	129
0.300006	2.15909	61.2	66
0.316673	-1.59091	64.6	52
0.33334	-1.59091	68	41
0.350007	2.15909	71.4	108
0.366674	3.40909	74.8	104
0.383341	-4.09091	78.2	264
0.400008	-1.59091	81.6	803
0.416675	-0.340909	85	929
0.433342	2.15909	88.4	1646
0.450009	7.15909	91.8	1563
0.466676	3.40909	95.2	982
0.483343	-5.34091	98.6	355
0.50001	3.40909	102	325
0.516677	2.15909	105.4	219
0.533344	4.65909	108.8	237
0.550011	4.65909	112.2	204
0.566678	-0.340909	115.6	465
0.583345	10.9091	119	482
0.600012	9.65909	122.4	361
0.616679	5.90909	125.8	342
0.633346	12.1591	129.2	227
0.650013	5.90909	132.6	98
0.66668	4.65909	136	33
0.683347	15.9091	139.4	27
0.700014	7.15909	142.8	27
0.716681	3.40909	146.2	34
0.733348	12.1591	149.6	51
0.750015	9.65909	153	81
0.766682	14.6591	156.4	116
0.783349	7.15909	159.8	59
0.800016	8.40909	163.2	102
0.816683	14.6591	166.6	57
0.83335	20.9091	170	51
0.850017	10.9091	173.4	65
0.866684	18.4091
0.883351	14.6591
0.900018	17.1591
0.916685	15.9091
0.933352	15.9091
0.950019	17.1591
0.966686	13.4091
0.983353	18.4091
1.00002	18.4091
1.01669	17.1591
1.03335	20.9091
1.05002	20.9091
1.06669	23.4091
1.08336	22.1591
1.10002	23.4091
1.11669	23.4091
1.13336	19.6591
1.15002	23.4091
1.16669	20.9091
1.18336	29.6591
1.20002	29.6591
1.21669	23.4091
1.23336	32.1591
1.25003	29.6591
1.26669	24.6591
1.28336	15.9091
1.30003	23.4091
1.31669	19.6591
1.33336	23.4091
1.35003	19.6591
1.36669	32.1591
1.38336	25.9091
1.40003	22.1591
1.4167	18.4091
1.43336	18.4091
1.45003	24.6591
1.4667	20.9091
1.48336	24.6591
1.50003	14.6591
1.5167	20.9091
1.53336	24.6591
1.55003	18.4091
1.5667	19.6591
1.58337	18.4091
1.60003	10.9091
1.6167	12.1591
1.63337	19.6591
1.65003	13.4091
1.6667	13.4091
1.68337	9.65909
1.70003	13.4091
1.7167	12.1591
1.73337	15.9091
1.75004	14.6591
1.7667	10.9091
1.78337	13.4091
1.80004	15.9091
1.8167	19.6591
1.83337	14.6591
1.85004	13.4091
1.8667	9.65909
1.88337	13.4091
1.90004	19.6591
1.91671	13.4091
1.93337	22.1591
1.95004	22.1591
1.96671	19.6591
1.98337	17.1591
2.00004	25.9091
2.01671	24.6591
2.03337	12.1591
2.05004	17.1591
2.06671	20.9091
2.08338	14.6591
2.10004	23.4091
2.11671	20.9091
2.13338	23.4091
2.15004	23.4091
2.16671	25.9091
2.18338	18.4091
2.20004	19.6591
2.21671	20.9091
2.23338	20.9091
2.25005	25.9091
2.26671	28.4091
2.28338	23.4091
2.30005	15.9091
2.31671	14.6591
2.33338	27.1591
2.35005	23.4091
2.36671	19.6591
2.38338	28.4091
2.40005	28.4091
2.41672	32.1591
2.43338	25.9091
2.45005	28.4091
2.46672	28.4091
2.48338	19.6591
2.50005	18.4091
2.51672	19.6591
2.53338	20.9091
2.55005	22.1591
2.56672	23.4091
2.58339	28.4091
2.60005	29.6591
2.61672	24.6591
2.63339	22.1591
2.65005	22.1591
2.66672	25.9091
2.68339	22.1591
2.70005	20.9091
2.71672	22.1591
2.73339	19.6591
2.75006	29.6591
2.76672	17.1591
2.78339	24.6591
2.80006	27.1591
2.81672	29.6591
2.83339	29.6591
2.85006	22.1591
2.86672	22.1591
2.88339	14.6591
2.90006	14.6591
2.91673	8.40909
2.93339	12.1591
2.95006	8.40909
2.96673	2.15909
2.98339	7.15909
3.00006	-0.340909
3.01673	2.15909
3.03339	2.15909
3.05006	3.40909
3.06673	-1.59091
3.0834	-0.340909
3.10006	-0.340909
3.11673	-6.59091
3.1334	2.15909
3.15006	3.40909
3.16673	3.40909
3.1834	3.40909
3.20006	-1.59091
3.21673	0.909091
3.2334	0.909091
3.25007	5.90909
3.26673	4.65909
3.2834	9.65909
3.30007	7.15909
3.31673	3.40909
3.3334	5.90909
3.35007	3.40909
3.36673	3.40909
3.3834	12.1591
3.40007	8.40909
3.41674	3.40909
3.4334	4.65909
3.45007	4.65909
3.46674	-0.340909
3.4834	5.90909
3.50007	0.909091
3.51674	4.65909
3.5334	5.90909
3.55007	3.40909
3.56674	3.40909
3.58341	7.15909
3.60007	4.65909
3.61674	10.9091
3.63341	13.4091
3.65007	13.4091
3.66674	10.9091
3.68341	18.4091
3.70007	14.6591
3.71674	19.6591
3.73341	18.4091
3.75008	15.9091
3.76674	18.4091
3.78341	24.6591
3.80008	28.4091
3.81674	25.9091
3.83341	24.6591
3.85008	15.9091
3.86674	24.6591
3.88341	23.4091
3.90008	24.6591
3.91675	25.9091
3.93341	20.9091
3.95008	25.9091
3.96675	24.6591
3.98341	24.6591
4.00008	25.9091
4.01675	23.4091
4.03341	20.9091
4.05008	25.9091
4.06675	30.9091
4.08342	27.1591
4.10008	27.1591
4.11675	29.6591
4.13342	23.4091
4.15008	24.6591
4.16675	25.9091
4.18342	28.4091
4.20008	22.1591
4.21675	24.6591
4.23342	22.1591
4.25009	18.4091
4.26675	28.4091
4.28342	22.1591
4.30009	25.9091
4.31675	29.6591
4.33342	20.9091
4.35009	27.1591
4.36675	27.1591
4.38342	29.6591
4.40009	25.9091
4.41676	33.4091
4.43342	30.9091
4.45009	33.4091
4.46676	23.4091
4.48342	19.6591
4.50009	22.1591
4.51676	20.9091
4.53342	20.9091
4.55009	17.1591
4.56676	27.1591
4.58343	19.6591
4.60009	18.4091
4.61676	23.4091
4.63343	25.9091
4.65009	24.6591
4.66676	19.6591
4.68343	12.1591
4.70009	13.4091
4.71676	3.40909
4.73343	8.40909
4.75009	8.40909
4.76676	15.9091
4.78343	9.65909
4.8001	9.65909
4.81676	15.9091
4.83343	14.6591
4.8501	18.4091
4.86676	12.1591
4.88343	18.4091
4.9001	13.4091
4.91677	17.1591
4.93343	15.9091
4.9501	13.4091
4.96677	13.4091
4.98343	14.6591
5.0001	7.15909
5.01677	12.1591
5.03343	19.6591
5.0501	17.1591
5.06677	15.9091
5.08344	7.15909
5.1001	12.1591
5.11677	19.6591
5.13344	9.65909
5.1501	19.6591
5.16677	18.4091
5.18344	20.9091
5.2001	17.1591
5.21677	24.6591
5.23344	23.4091
5.25011	23.4091
5.26677	30.9091
5.28344	22.1591
5.30011	23.4091
5.31677	22.1591
5.33344	19.6591
5.35011	23.4091
5.36677	30.9091
5.38344	24.6591
5.40011	23.4091
5.41678	17.1591
5.43344	23.4091
5.45011	20.9091
5.46678	24.6591
5.48344	25.9091
5.50011	24.6591
5.51678	24.6591
5.53344	20.9091
5.55011	15.9091
5.56678	13.4091
5.58345	15.9091
5.60011	9.65909
5.61678	13.4091
5.63345	12.1591
5.65011	20.9091
5.66678	19.6591
5.68345	13.4091
5.70011	17.1591
5.71678	18.4091
5.73345	17.1591
5.75012	23.4091
5.76678	17.1591
5.78345	23.4091
5.80012	24.6591
5.81678	19.6591
5.83345	27.1591
5.85012	25.9091
5.86678	17.1591
5.88345	22.1591
5.90012	24.6591
5.91679	25.9091
5.93345	23.4091
5.95012	18.4091
5.96679	30.9091
5.98345	20.9091
6.00012	28.4091
6.01679	22.1591
6.03345	24.6591
6.05012	22.1591
6.06679	27.1591
6.08346	29.6591
6.10012	27.1591
6.11679	17.1591
6.13346	25.9091
6.15012	18.4091
6.16679	24.6591
6.18346	23.4091
6.20012	23.4091
6.21679	22.1591
6.23346	18.4091
6.25013	17.1591
6.26679	23.4091
6.28346	18.4091
6.30013	22.1591
6.31679	19.6591
6.33346	20.9091
6.35013	28.4091
6.36679	29.6591
6.38346	27.1591
6.40013	23.4091
6.4168	24.6591
6.43346	34.6591
6.45013	32.1591
6.4668	29.6591
6.48346	28.4091
6.50013	28.4091
6.5168	28.4091
6.53346	29.6591
6.55013	29.6591
6.5668	24.6591
6.58347	22.1591
6.60013	23.4091
6.6168	34.6591
6.63347	22.1591
6.65013	18.4091
6.6668	22.1591
6.68347	29.6591
6.70013	22.1591
6.7168	23.4091
6.73347	24.6591
6.75014	29.6591
6.7668	20.9091
6.78347	22.1591
6.80014	20.9091
6.8168	23.4091
6.83347	28.4091
6.85014	25.9091
6.8668	22.1591
6.88347	24.6591
6.90014	20.9091
6.91681	32.1591
6.93347	24.6591
6.95014	33.4091
6.96681	27.1591
6.98347	25.9091
7.00014	5.90909
7.01681	3.40909
7.03347	2.15909
7.05014	-5.34091
7.06681	3.40909
7.08348	-0.340909
7.10014	-0.340909
7.11681	-4.09091
7.13348	-5.34091
7.15014	-0.340909
7.16681	7.15909
7.18348	0.909091
7.20014	0.909091
7.21681	2.15909
7.23348	8.40909
7.25015	10.9091
7.26681	5.90909
7.28348	5.90909
7.30015	8.40909
7.31681	8.40909
7.33348	8.40909
7.35015	5.90909
7.36681	5.90909
7.38348	5.90909
7.40015	13.4091
7.41682	5.90909
7.43348	17.1591
7.45015	12.1591
7.46682	15.9091
7.48348	15.9091
7.50015	12.1591
7.51682	3.40909
7.53348	4.65909
7.55015	8.40909
7.56682	5.90909
7.58349	3.40909
7.60015	7.15909
7.61682	9.65909
7.63349	7.15909
7.65015	8.40909
7.66682	3.40909
7.68349	9.65909
7.70015	0.909091
7.71682	3.40909
7.73349	10.9091
7.75016	10.9091
7.76682	12.1591
7.78349	15.9091
7.80016	12.1591
7.81682	9.65909
7.83349	5.90909
7.85016	3.40909
7.86682	4.65909
7.88349	3.40909
7.90016	10.9091
7.91683	5.90909
7.93349	3.40909
7.95016	5.90909
7.96683	5.90909
7.98349	-2.84091
8.00016	-0.340909
8.01683	3.40909
8.03349	4.65909
8.05016	2.15909
8.06683	5.90909
8.0835	0.909091
8.10016	-0.340909
8.11683	3.40909
8.1335	2.15909
8.15016	0.909091
8.16683	3.40909
8.1835	-7.84091
8.20016	-7.84091
8.21683	5.90909
8.2335	0.909091
8.25017	3.40909
8.26683	2.15909
8.2835	5.90909
8.30017	7.15909
8.31683	4.65909
8.3335	3.40909
8.35017	-1.59091
8.36683	10.9091
8.3835	8.40909
8.40017	0.909091
8.41684	7.15909
8.4335	10.9091
8.45017	4.65909
8.46684	14.6591
8.4835	13.4091
8.50017	13.4091
8.51684	12.1591
8.5335	12.1591
8.55017	7.15909
8.56684	8.40909
8.58351	8.40909
8.60017	15.9091
8.61684	9.65909
8.63351	13.4091
8.65017	12.1591
8.66684	14.6591
8.68351	10.9091
8.70017	17.1591
8.71684	15.9091
8.73351	17.1591
8.75018	19.6591
8.76684	22.1591
8.78351	12.1591
8.80018	13.4091
8.81684	10.9091
8.83351	7.15909
8.85018	10.9091
8.86684	14.6591
8.88351	12.1591
8.90018	-4.09091
8.91685	2.15909
8.93351	0.909091
8.95018	9.65909
8.96685	5.90909
8.98351	4.65909
9.00018	2.15909
9.01685	0.909091
9.03351	5.90909
9.05018	12.1591
9.06685	14.6591
9.08352	14.6591
9.10018	13.4091
9.11685	13.4091
9.13352	9.65909
9.15018	18.4091
9.16685	10.9091
9.18352	13.4091
9.20018	19.6591
9.21685	7.15909
9.23352	14.6591
9.25019	13.4091
9.26685	20.9091
9.28352	10.9091
9.30019	20.9091
9.31685	15.9091
9.33352	18.4091
9.35019	14.6591
9.36685	13.4091
9.38352	10.9091
9.40019	12.1591
9.41685	17.1591
9.43352	17.1591
9.45019	17.1591
9.46686	20.9091
9.48352	23.4091
9.50019	23.4091
9.51686	30.9091
9.53352	20.9091
9.55019	17.1591
9.56686	13.4091
9.58352	15.9091
9.60019	17.1591
9.61686	20.9091
9.63353	13.4091
9.65019	10.9091
9.66686	18.4091
9.68353	23.4091
9.70019	24.6591
9.71686	25.9091
9.73353	20.9091
9.7502	24.6591
9.76686	23.4091
9.78353	22.1591
9.8002	19.6591
9.81686	22.1591
9.83353	28.4091
9.8502	27.1591
9.86686	12.1591
9.88353	20.9091
9.9002	22.1591
9.91687	25.9091
9.93353	22.1591
9.9502	23.4091
9.96687	17.1591
9.98353	17.1591
10.0002	18.4091
10.0169	14.6591
10.0335	19.6591
10.0502	18.4091
10.0669	24.6591
10.0835	27.1591
10.1002	13.4091
10.1169	22.1591
10.1335	23.4091
10.1502	23.4091
10.1669	19.6591
10.1835	18.4091
10.2002	20.9091
10.2169	20.9091
10.2335	13.4091
10.2502	27.1591
10.2669	23.4091
10.2835	28.4091
10.3002	33.4091
10.3169	25.9091
10.3335	35.9091
10.3502	24.6591
10.3669	23.4091
10.3835	20.9091
10.4002	27.1591
10.4169	19.6591
10.4335	22.1591
10.4502	20.9091
10.4669	25.9091
10.4835	24.6591
10.5002	14.6591
10.5169	20.9091
10.5335	22.1591
10.5502	25.9091
10.5669	20.9091
10.5835	15.9091
10.6002	19.6591
10.6169	22.1591
10.6335	22.1591
10.6502	24.6591
10.6669	23.4091
10.6835	28.4091
10.7002	24.6591
10.7169	25.9091
10.7335	23.4091
10.7502	10.9091
10.7669	20.9091
10.7835	19.6591
10.8002	17.1591
10.8169	18.4091
10.8336	22.1591
10.8502	22.1591
10.8669	20.9091
10.8836	29.6591
10.9002	25.9091
10.9169	25.9091
10.9336	24.6591
10.9502	20.9091
10.9669	19.6591
10.9836	17.1591
11.0002	18.4091
11.0169	17.1591
11.0336	22.1591
11.0502	22.1591
11.0669	13.4091
11.0836	15.9091
11.1002	13.4091
11.1169	14.6591
11.1336	13.4091
11.1502	8.40909
11.1669	4.65909
11.1836	4.65909
11.2002	8.40909
11.2169	2.15909
11.2336	4.65909
11.2502	8.40909
11.2669	7.15909
11.2836	13.4091
11.3002	15.9091
11.3169	13.4091
11.3336	13.4091
11.3502	9.65909
11.3669	12.1591
11.3836	13.4091
11.4002	15.9091
11.4169	13.4091
11.4336	14.6591
11.4502	19.6591
11.4669	12.1591
11.4836	10.9091
11.5002	20.9091
11.5169	14.6591
11.5336	18.4091
11.5502	22.1591
11.5669	18.4091
11.5836	19.6591
11.6002	17.1591
11.6169	20.9091
11.6336	25.9091
11.6502	22.1591
11.6669	25.9091
11.6836	29.6591
11.7002	27.1591
11.7169	23.4091
11.7336	27.1591
11.7502	27.1591
11.7669	27.1591
11.7836	17.1591
11.8002	20.9091
11.8169	22.1591
11.8336	20.9091
11.8502	18.4091
11.8669	23.4091
11.8836	18.4091
11.9002	23.4091
11.9169	22.1591
11.9336	23.4091
11.9502	13.4091
11.9669	23.4091
11.9836	17.1591
12.0002	24.6591
12.0169	24.6591
12.0336	18.4091
12.0502	24.6591
12.0669	29.6591
12.0836	28.4091
12.1002	28.4091
12.1169	27.1591
12.1336	30.9091
12.1502	25.9091
12.1669	20.9091
12.1836	32.1591
12.2002	24.6591
12.2169	25.9091
12.2336	23.4091
12.2502	22.1591
12.2669	19.6591
12.2836	24.6591
12.3002	24.6591
12.3169	32.1591
12.3336	28.4091
12.3502	23.4091
12.3669	29.6591
12.3836	32.1591
12.4002	25.9091
12.4169	27.1591
12.4336	28.4091
12.4502	30.9091
12.4669	27.1591
12.4836	17.1591
12.5003	22.1591
12.5169	23.4091
12.5336	22.1591
12.5503	17.1591
12.5669	22.1591
12.5836	22.1591
12.6003	10.9091
12.6169	13.4091
12.6336	9.65909
12.6503	10.9091
12.6669	13.4091
12.6836	20.9091
12.7003	22.1591
12.7169	20.9091
12.7336	18.4091
12.7503	17.1591
12.7669	18.4091
12.7836	13.4091
12.8003	12.1591
12.8169	5.90909
12.8336	2.15909
12.8503	7.15909
12.8669	8.40909
12.8836	3.40909
12.9003	-1.59091
12.9169	2.15909
12.9336	0.909091
12.9503	5.90909
12.9669	7.15909
12.9836	10.9091
13.0003	4.65909
13.0169	5.90909
13.0336	10.9091
13.0503	8.40909
13.0669	12.1591
13.0836	7.15909
13.1003	15.9091
13.1169	12.1591
13.1336	14.6591
13.1503	15.9091
13.1669	19.6591
13.1836	17.1591
13.2003	19.6591
13.2169	22.1591
13.2336	20.9091
13.2503	24.6591
13.2669	27.1591
13.2836	30.9091
13.3003	23.4091
13.3169	30.9091
13.3336	27.1591
13.3503	24.6591
13.3669	20.9091
13.3836	19.6591
13.4003	27.1591
13.4169	23.4091
13.4336	25.9091
13.4503	27.1591
13.4669	25.9091
13.4836	29.6591
13.5003	22.1591
13.5169	13.4091
13.5336	27.1591
13.5503	24.6591
13.5669	22.1591
13.5836	33.4091
13.6003	28.4091
13.6169	30.9091
13.6336	34.6591
13.6503	23.4091
13.6669	30.9091
13.6836	29.6591
13.7003	29.6591
13.7169	25.9091
13.7336	29.6591
13.7503	27.1591
13.7669	30.9091
13.7836	22.1591
13.8003	29.6591
13.8169	22.1591
13.8336	24.6591
13.8503	23.4091
13.8669	8.40909
13.8836	17.1591
13.9003	17.1591
13.9169	19.6591
13.9336	19.6591
13.9503	9.65909
13.9669	19.6591
13.9836	13.4091
14.0003	18.4091
14.0169	24.6591
14.0336	22.1591
14.0503	24.6591
14.0669	27.1591
14.0836	27.1591
14.1003	25.9091
14.1169	19.6591
14.1336	27.1591
14.1503	24.6591
14.167	29.6591
14.1836	23.4091
14.2003	27.1591
14.217	27.1591
14.2336	30.9091
14.2503	25.9091
14.267	24.6591
14.2836	23.4091
14.3003	27.1591
14.317	27.1591
14.3336	19.6591
14.3503	23.4091
14.367	22.1591
14.3836	28.4091
14.4003	25.9091
14.417	29.6591
14.4336	32.1591
14.4503	23.4091
14.467	33.4091
14.4836	22.1591
14.5003	23.4091
14.517	28.4091
14.5336	30.9091
14.5503	20.9091
14.567	27.1591
14.5836	23.4091
14.6003	25.9091
14.617	18.4091
14.6336	18.4091
14.6503	19.6591
14.667	27.1591
14.6836	18.4091
14.7003	22.1591
14.717	20.9091
14.7336	19.6591
14.7503	18.4091
14.767	22.1591
14.7836	23.4091
14.8003	25.9091
14.817	15.9091
14.8336	22.1591
14.8503	18.4091
14.867	23.4091
14.8836	17.1591
14.9003	13.4091
14.917	14.6591
14.9336	13.4091
14.9503	13.4091
14.967	17.1591
14.9836	22.1591
15.0003	19.6591
15.017	17.1591
15.0336	25.9091
15.0503	12.1591
15.067	15.9091
15.0836	18.4091
15.1003	15.9091
15.117	22.1591
15.1336	24.6591
15.1503	28.4091
15.167	25.9091
15.1836	25.9091
15.2003	28.4091
15.217	27.1591
15.2336	30.9091
15.2503	24.6591
15.267	30.9091
15.2836	32.1591
15.3003	33.4091
15.317	29.6591
15.3336	22.1591
15.3503	32.1591
15.367	23.4091
15.3836	23.4091
15.4003	25.9091
15.417	30.9091
15.4336	30.9091
15.4503	20.9091
15.467	32.1591
15.4836	28.4091
15.5003	30.9091
15.517	39.6591
15.5336	24.6591
15.5503	23.4091
15.567	30.9091
15.5836	33.4091
15.6003	33.4091
15.617	28.4091
15.6336	23.4091
15.6503	19.6591
15.667	17.1591
15.6836	15.9091
15.7003	23.4091
15.717	18.4091
15.7336	22.1591
15.7503	23.4091
15.767	24.6591
15.7836	19.6591
15.8003	22.1591
15.817	25.9091
15.8337	29.6591
15.8503	33.4091
15.867	20.9091
15.8837	22.1591
15.9003	20.9091
15.917	19.6591
15.9337	22.1591
15.9503	25.9091
15.967	27.1591
15.9837	19.6591
16.0003	20.9091
16.017	18.4091
16.0337	22.1591
16.0503	24.6591
16.067	23.4091
16.0837	25.9091
16.1003	22.1591
16.117	29.6591
16.1337	15.9091
16.1503	17.1591
16.167	17.1591
16.1837	14.6591
16.2003	14.6591
16.217	17.1591
16.2337	15.9091
16.2503	14.6591
16.267	14.6591
16.2837	15.9091
16.3003	20.9091
16.317	19.6591
16.3337	20.9091
16.3503	17.1591
16.367	22.1591
16.3837	23.4091
16.4003	23.4091
16.417	25.9091
16.4337	22.1591
16.4503	20.9091
16.467	25.9091
16.4837	27.1591
16.5003	22.1591
16.517	27.1591
16.5337	23.4091
16.5503	17.1591
16.567	20.9091
16.5837	23.4091
16.6003	14.6591
16.617	23.4091
16.6337	14.6591
16.6503	9.65909
16.667	9.65909
16.6837	14.6591
16.7003	14.6591
16.717	15.9091
16.7337	9.65909
16.7503	17.1591
16.767	12.1591
16.7837	20.9091
16.8003	19.6591
16.817	32.1591
16.8337	24.6591
16.8503	22.1591
16.867	23.4091
16.8837	34.6591
16.9003	24.6591
16.917	17.1591
16.9337	22.1591
16.9503	19.6591
16.967	27.1591
16.9837	27.1591
17.0003	25.9091
17.017	29.6591
17.0337	32.1591
17.0503	27.1591
17.067	28.4091
17.0837	19.6591
17.1003	28.4091
17.117	27.1591
17.1337	25.9091
17.1503	33.4091
17.167	33.4091
17.1837	32.1591
17.2003	27.1591
17.217	39.6591
17.2337	33.4091
17.2503	35.9091
17.267	42.1591
17.2837	40.9091
17.3003	42.1591
17.317	37.1591
17.3337	37.1591
17.3503	43.4091
17.367	43.4091
17.3837	43.4091
17.4003	40.9091
17.417	45.9091
17.4337	47.1591
17.4503	42.1591
17.467	45.9091
17.4837	45.9091
17.5004	40.9091
17.517	40.9091
17.5337	38.4091
17.5504	45.9091
17.567	37.1591
17.5837	45.9091
17.6004	47.1591
17.617	33.4091
17.6337	37.1591
17.6504	32.1591
17.667	40.9091
17.6837	34.6591
17.7004	39.6591
17.717	39.6591
17.7337	37.1591
17.7504	38.4091
17.767	37.1591
17.7837	30.9091
17.8004	33.4091
17.817	38.4091
17.8337	33.4091
17.8504	30.9091
17.867	40.9091
17.8837	34.6591
17.9004	34.6591
17.917	42.1591
17.9337	39.6591
17.9504	38.4091
17.967	43.4091
17.9837	37.1591
18.0004	43.4091
18.017	39.6591
18.0337	33.4091
18.0504	40.9091
18.067	25.9091
18.0837	29.6591
18.1004	32.1591
18.117	32.1591
18.1337	35.9091
18.1504	34.6591
18.167	32.1591
18.1837	32.1591
18.2004	29.6591
18.217	25.9091
18.2337	23.4091
18.2504	28.4091
18.267	29.6591
18.2837	25.9091
18.3004	29.6591
18.317	32.1591
18.3337	37.1591
18.3504	33.4091
18.367	23.4091
18.3837	27.1591
18.4004	27.1591
18.417	29.6591
18.4337	25.9091
18.4504	17.1591
18.467	23.4091
18.4837	22.1591
18.5004	22.1591
18.517	23.4091
18.5337	17.1591
18.5504	23.4091
18.567	17.1591
18.5837	27.1591
18.6004	19.6591
18.617	19.6591
18.6337	13.4091
18.6504	8.40909
18.667	14.6591
18.6837	14.6591
18.7004	12.1591
18.717	9.65909
18.7337	15.9091
18.7504	15.9091
18.767	10.9091
18.7837	7.15909
18.8004	14.6591
18.817	14.6591
18.8337	13.4091
18.8504	4.65909
18.867	14.6591
18.8837	15.9091
18.9004	15.9091
18.917	10.9091
18.9337	10.9091
18.9504	20.9091
18.967	10.9091
18.9837	17.1591
19.0004	24.6591
19.017	14.6591
19.0337	13.4091
19.0504	22.1591
19.067	13.4091
19.0837	15.9091
19.1004	9.65909
19.117	18.4091
19.1337	22.1591
19.1504	19.6591
19.167	15.9091
19.1837	10.9091
19.2004	12.1591
19.2171	18.4091
19.2337	18.4091
19.2504	24.6591
19.2671	22.1591
19.2837	19.6591
19.3004	19.6591
19.3171	9.65909
19.3337	13.4091
19.3504	7.15909
19.3671	22.1591
19.3837	15.9091
19.4004	17.1591
19.4171	10.9091
19.4337	14.6591
19.4504	17.1591
19.4671	18.4091
19.4837	19.6591
19.5004	15.9091
19.5171	15.9091
19.5337	25.9091
19.5504	24.6591
19.5671	12.1591
19.5837	13.4091
19.6004	13.4091
19.6171	8.40909
19.6337	10.9091
19.6504	9.65909
19.6671	2.15909
19.6837	7.15909
19.7004	2.15909
19.7171	-0.340909
19.7337	-0.340909
19.7504	9.65909
19.7671	5.90909
19.7837	7.15909
19.8004	7.15909
19.8171	8.40909
19.8337	10.9091
19.8504	3.40909
19.8671	7.15909
19.8837	2.15909
19.9004	0.909091
19.9171	4.65909
19.9337	2.15909
19.9504	9.65909
19.9671	3.40909
19.9837	0.909091
20.0004	8.40909
20.0171	3.40909
20.0337	-0.340909
20.0504	3.40909
20.0671	4.65909
20.0837	-0.340909
20.1004	3.40909
20.1171	2.15909
20.1337	-0.340909
20.1504	0.909091
20.1671	8.40909
20.1837	0.909091
20.2004	3.40909
20.2171	0.909091
20.2337	9.65909
20.2504	3.40909
20.2671	3.40909
20.2837	3.40909
20.3004	0.909091
20.3171	2.15909
20.3337	5.90909
20.3504	14.6591
20.3671	8.40909
20.3837	7.15909
20.4004	4.65909
20.4171	4.65909
20.4337	2.15909
20.4504	0.909091
20.4671	4.65909
20.4837	-0.340909
20.5004	3.40909
20.5171	7.15909
20.5337	-1.59091
20.5504	3.40909
20.5671	2.15909
20.5837	5.90909
20.6004	0.909091
20.6171	3.40909
20.6337	-1.59091
20.6504	0.909091
20.6671	-2.84091
20.6837	-0.340909
20.7004	-0.340909
20.7171	-4.09091
20.7337	3.40909
20.7504	4.65909
20.7671	2.15909
20.7837	7.15909
20.8004	-0.340909
20.8171	2.15909
20.8338	5.90909
20.8504	7.15909
20.8671	4.65909
20.8838	2.15909
20.9004	-0.340909
20.9171	2.15909
20.9338	4.65909
20.9504	0.909091
20.9671	4.65909
20.9838	4.65909
21.0004	0.909091
21.0171	-0.340909
21.0338	-1.59091
21.0504	0.909091
21.0671	2.15909
21.0838	0.909091
21.1004	5.90909
21.1171	-1.59091
21.1338	4.65909
21.1504	2.15909
21.1671	-1.59091
21.1838	3.40909
21.2004	-2.84091
21.2171	2.15909
21.2338	5.90909
21.2504	-4.09091
21.2671	3.40909
21.2838	7.15909
21.3004	2.15909
21.3171	2.15909
21.3338	4.65909
21.3504	8.40909
21.3671	8.40909
21.3838	5.90909
21.4004	5.90909
21.4171	7.15909
21.4338	4.65909
21.4504	3.40909
21.4671	2.15909
21.4838	7.15909
21.5004	2.15909
21.5171	5.90909
21.5338	12.1591
21.5504	14.6591
21.5671	10.9091
21.5838	4.65909
21.6004	5.90909
21.6171	7.15909
21.6338	5.90909
21.6504	4.65909
21.6671	-0.340909
21.6838	7.15909
21.7004	7.15909
21.7171	7.15909
21.7338	17.1591
21.7504	2.15909
21.7671	13.4091
21.7838	12.1591
21.8004	13.4091
21.8171	13.4091
21.8338	10.9091
21.8504	13.4091
21.8671	8.40909
21.8838	15.9091
21.9004	15.9091
21.9171	15.9091
21.9338	12.1591
21.9504	15.9091
21.9671	22.1591
21.9838	19.6591
22.0004	29.6591
22.0171	19.6591
22.0338	18.4091
22.0504	14.6591
22.0671	18.4091
22.0838	17.1591
22.1004	22.1591
22.1171	24.6591
22.1338	22.1591
22.1504	23.4091
22.1671	24.6591
22.1838	23.4091
22.2004	24.6591
22.2171	23.4091
22.2338	22.1591
22.2504	27.1591
22.2671	22.1591
22.2838	30.9091
22.3004	20.9091
22.3171	32.1591
22.3338	20.9091
22.3504	28.4091
22.3671	22.1591
22.3838	30.9091
22.4004	28.4091
22.4171	24.6591
22.4338	34.6591
22.4504	24.6591
22.4671	34.6591
22.4838	30.9091
22.5005	28.4091
22.5171	24.6591
22.5338	22.1591
22.5505	17.1591
22.5671	22.1591
22.5838	24.6591
22.6005	28.4091
22.6171	27.1591
22.6338	13.4091
22.6505	22.1591
22.6671	17.1591
22.6838	14.6591
22.7005	23.4091
22.7171	18.4091
22.7338	17.1591
22.7505	18.4091
22.7671	18.4091
22.7838	14.6591
22.8005	19.6591
22.8171	17.1591
22.8338	23.4091
22.8505	18.4091
22.8671	20.9091
22.8838	19.6591
22.9005	22.1591
22.9171	24.6591
22.9338	23.4091
22.9505	22.1591
22.9671	20.9091
22.9838	27.1591
23.0005	25.9091
23.0171	24.6591
23.0338	17.1591
23.0505	23.4091
23.0671	24.6591
23.0838	19.6591
23.1005	22.1591
23.1171	14.6591
23.1338	12.1591
23.1505	18.4091
23.1671	17.1591
23.1838	17.1591
23.2005	12.1591
23.2171	23.4091
23.2338	12.1591
23.2505	17.1591
23.2671	23.4091
23.2838	20.9091
23.3005	19.6591
23.3171	20.9091
23.3338	19.6591
23.3505	18.4091
23.3671	17.1591
23.3838	14.6591
23.4005	15.9091
23.4171	13.4091
23.4338	7.15909
23.4505	9.65909
23.4671	12.1591
23.4838	13.4091
23.5005	19.6591
23.5171	19.6591
23.5338	27.1591
23.5505	29.6591
23.5671	28.4091
23.5838	30.9091
23.6005	28.4091
23.6171	25.9091
23.6338	24.6591
23.6505	27.1591
23.6671	27.1591
23.6838	20.9091
23.7005	22.1591
23.7171	19.6591
23.7338	27.1591
23.7505	24.6591
23.7671	22.1591
23.7838	22.1591
23.8005	28.4091
23.8171	22.1591
23.8338	27.1591
23.8505	28.4091
23.8671	24.6591
23.8838	27.1591
23.9005	25.9091
23.9171	22.1591
23.9338	17.1591
23.9505	23.4091
23.9671	30.9091
23.9838	25.9091
24.0005	32.1591
24.0171	24.6591
24.0338	30.9091
24.0505	27.1591
24.0671	13.4091
24.0838	12.1591
24.1005	12.1591
24.1171	13.4091
24.1338	12.1591
24.1505	13.4091
24.1672	9.65909
24.1838	17.1591
24.2005	13.4091
24.2172	13.4091
24.2338	12.1591
24.2505	15.9091
24.2672	17.1591
24.2838	23.4091
24.3005	24.6591
24.3172	28.4091
24.3338	27.1591
24.3505	20.9091
24.3672	25.9091
24.3838	15.9091
24.4005	17.1591
24.4172	19.6591
24.4338	22.1591
24.4505	29.6591
24.4672	20.9091
24.4838	23.4091
24.5005	28.4091
24.5172	27.1591
24.5338	33.4091
24.5505	29.6591
24.5672	29.6591
24.5838	30.9091
24.6005	32.1591
24.6172	32.1591
24.6338	35.9091
24.6505	32.1591
24.6672	29.6591
24.6838	33.4091
24.7005	37.1591
24.7172	35.9091
24.7338	40.9091
24.7505	40.9091
24.7672	42.1591
24.7838	40.9091
24.8005	40.9091
24.8172	39.6591
24.8338	38.4091
24.8505	38.4091
24.8672	40.9091
24.8838	43.4091
24.9005	35.9091
24.9172	43.4091
24.9338	45.9091
24.9505	39.6591
24.9672	39.6591
24.9838	43.4091
25.0005	43.4091
25.0172	43.4091
25.0338	42.1591
25.0505	47.1591
25.0672	49.6591
25.0838	45.9091
25.1005	43.4091
25.1172	48.4091
25.1338	50.9091
25.1505	50.9091
25.1672	47.1591
25.1838	49.6591
25.2005	48.4091
25.2172	53.4091
25.2338	54.6591
25.2505	50.9091
25.2672	52.1591
25.2838	45.9091
25.3005	45.9091
25.3172	44.6591
25.3338	49.6591
25.3505	54.6591
25.3672	54.6591
25.3838	47.1591
25.4005	48.4091
25.4172	42.1591
25.4338	43.4091
25.4505	45.9091
25.4672	52.1591
25.4838	49.6591
25.5005	52.1591
25.5172	57.1591
25.5338	53.4091
25.5505	50.9091
25.5672	44.6591
25.5838	39.6591
25.6005	44.6591
25.6172	58.4091
25.6338	49.6591
25.6505	52.1591
25.6672	58.4091
25.6838	62.1591
25.7005	62.1591
25.7172	62.1591
25.7338	58.4091
25.7505	60.9091
25.7672	59.6591
25.7838	55.9091
25.8005	53.4091
25.8172	60.9091
25.8339	57.1591
25.8505	52.1591
25.8672	57.1591
25.8839	57.1591
25.9005	55.9091
25.9172	55.9091
25.9339	57.1591
25.9505	57.1591
25.9672	54.6591
25.9839	60.9091
26.0005	60.9091
26.0172	59.6591
26.0339	59.6591
26.0505	58.4091
26.0672	57.1591
26.0839	53.4091
26.1005	63.4091
26.1172	59.6591
26.1339	60.9091
26.1505	62.1591
26.1672	62.1591
26.1839	58.4091
26.2005	54.6591
26.2172	58.4091
26.2339	53.4091
26.2505	55.9091
26.2672	55.9091
26.2839	47.1591
26.3005	54.6591
26.3172	59.6591
26.3339	57.1591
26.3505	48.4091
26.3672	50.9091
26.3839	55.9091
26.4005	52.1591
26.4172	49.6591
26.4339	57.1591
26.4505	55.9091
26.4672	55.9091
26.4839	50.9091
26.5005	57.1591
26.5172	52.1591
26.5339	54.6591
26.5505	57.1591
26.5672	55.9091
26.5839	62.1591
26.6005	57.1591
26.6172	55.9091
26.6339	55.9091
26.6505	58.4091
26.6672	65.9091
26.6839	69.6591
26.7005	55.9091
26.7172	62.1591
26.7339	65.9091
26.7505	67.1591
26.7672	65.9091
26.7839	65.9091
26.8005	52.1591
26.8172	55.9091
26.8339	55.9091
26.8505	59.6591
26.8672	58.4091
26.8839	59.6591
26.9005	60.9091
26.9172	55.9091
26.9339	59.6591
26.9505	53.4091
26.9672	62.1591
26.9839	53.4091
27.0005	60.9091
27.0172	60.9091
27.0339	60.9091
27.0505	67.1591
27.0672	62.1591
27.0839	65.9091
27.1005	63.4091
27.1172	58.4091
27.1339	48.4091
27.1505	47.1591
27.1672	50.9091
27.1839	49.6591
27.2005	50.9091
27.2172	53.4091
27.2339	49.6591
27.2505	54.6591
27.2672	47.1591
27.2839	57.1591
27.3005	49.6591
27.3172	50.9091
27.3339	53.4091
27.3505	48.4091
27.3672	54.6591
27.3839	64.6591
27.4005	48.4091
27.4172	55.9091
27.4339	55.9091
27.4505	54.6591
27.4672	50.9091
27.4839	58.4091
27.5006	52.1591
27.5172	50.9091
27.5339	45.9091
27.5506	45.9091
27.5672	52.1591
27.5839	54.6591
27.6006	58.4091
27.6172	45.9091
27.6339	40.9091
27.6506	53.4091
27.6672	58.4091
27.6839	55.9091
27.7006	57.1591
27.7172	58.4091
27.7339	50.9091
27.7506	43.4091
27.7672	52.1591
27.7839	53.4091
27.8006	50.9091
27.8172	54.6591
27.8339	50.9091
27.8506	50.9091
27.8672	53.4091
27.8839	44.6591
27.9006	49.6591
27.9172	48.4091
27.9339	47.1591
27.9506	53.4091
27.9672	44.6591
27.9839	47.1591
28.0006	48.4091
28.0172	49.6591
28.0339	53.4091
28.0506	49.6591
28.0672	47.1591
28.0839	50.9091
28.1006	58.4091
28.1172	57.1591
28.1339	62.1591
28.1506	57.1591
28.1672	60.9091
28.1839	57.1591
28.2006	54.6591
28.2172	58.4091
28.2339	63.4091
28.2506	68.4091
28.2672	62.1591
28.2839	68.4091
28.3006	62.1591
28.3172	63.4091
28.3339	73.4091
28.3506	63.4091
28.3672	62.1591
28.3839	70.9091
28.4006	63.4091
28.4172	62.1591
28.4339	63.4091
28.4506	58.4091
28.4672	54.6591
28.4839	59.6591
28.5006	55.9091
28.5172	60.9091
28.5339	64.6591
28.5506	65.9091
28.5672	53.4091
28.5839	60.9091
28.6006	53.4091
28.6172	54.6591
28.6339	54.6591
28.6506	57.1591
28.6672	60.9091
28.6839	62.1591
28.7006	74.6591
28.7172	68.4091
28.7339	69.6591
28.7506	73.4091
28.7672	70.9091
28.7839	70.9091
28.8006	68.4091
28.8172	72.1591
28.8339	73.4091
28.8506	74.6591
28.8672	80.9091
28.8839	80.9091
28.9006	75.9091
28.9172	74.6591
28.9339	84.6591
28.9506	72.1591
28.9672	74.6591
28.9839	72.1591
29.0006	73.4091
29.0172	77.1591
29.0339	73.4091
29.0506	83.4091
29.0672	69.6591
29.0839	72.1591
29.1006	73.4091
29.1172	75.9091
29.1339	73.4091
29.1506	78.4091
29.1673	72.1591
29.1839	72.1591
29.2006	65.9091
29.2173	78.4091
29.2339	77.1591
29.2506	75.9091
29.2673	69.6591
29.2839	80.9091
29.3006	82.1591
29.3173	75.9091
29.3339	79.6591
29.3506	80.9091
29.3673	80.9091
29.3839	80.9091
29.4006	77.1591
29.4173	77.1591
29.4339	80.9091
29.4506	80.9091
29.4673	89.6591
29.4839	92.1591
29.5006	82.1591
29.5173	90.9091
29.5339	87.1591
29.5506	85.9091
29.5673	88.4091
29.5839	84.6591
29.6006	87.1591
29.6173	88.4091
29.6339	90.9091
29.6506	80.9091
29.6673	89.6591
29.6839	94.6591
29.7006	89.6591
29.7173	85.9091
29.7339	88.4091
29.7506	95.9091
29.7673	83.4091
29.7839	88.4091
29.8006	90.9091
29.8173	83.4091
29.8339	88.4091
29.8506	85.9091
29.8673	94.6591
29.8839	97.1591
29.9006	98.4091
29.9173	95.9091
29.9339	93.4091
29.9506	90.9091
29.9673	92.1591
29.9839	93.4091
30.0006	95.9091
30.0173	89.6591
30.0339	82.1591
30.0506	80.9091
30.0673	92.1591
30.0839	90.9091
30.1006	79.6591
30.1173	92.1591
30.1339	93.4091
30.1506	87.1591
30.1673	92.1591
30.1839	89.6591
30.2006	92.1591
30.2173	94.6591
30.2339	87.1591
30.2506	88.4091
30.2673	88.4091
30.2839	97.1591
30.3006	95.9091
30.3173	94.6591
30.3339	92.1591
30.3506	94.6591
30.3673	95.9091
30.3839	95.9091
30.4006	95.9091
30.4173	92.1591
30.4339	88.4091
30.4506	99.6591
30.4673	98.4091
30.4839	88.4091
30.5006	84.6591
30.5173	87.1591
30.5339	89.6591
30.5506	82.1591
30.5673	75.9091
30.5839	89.6591
30.6006	90.9091
30.6173	95.9091
30.6339	89.6591
30.6506	104.659
30.6673	93.4091
30.6839	84.6591
30.7006	94.6591
30.7173	95.9091
30.7339	94.6591
30.7506	87.1591
30.7673	90.9091
30.7839	93.4091
30.8006	98.4091
30.8173	97.1591
30.834	88.4091
30.8506	93.4091
30.8673	90.9091
30.884	103.409
30.9006	92.1591
30.9173	90.9091
30.934	97.1591
30.9506	87.1591
30.9673	98.4091
30.984	94.6591
31.0006	90.9091
31.0173	92.1591
31.034	84.6591
31.0506	84.6591
31.0673	85.9091
31.084	85.9091
31.1006	87.1591
31.1173	77.1591
31.134	83.4091
31.1506	78.4091
31.1673	82.1591
31.184	82.1591
31.2006	84.6591
31.2173	84.6591
31.234	79.6591
31.2506	90.9091
31.2673	79.6591
31.284	94.6591
31.3006	93.4091
31.3173	95.9091
31.334	87.1591
31.3506	93.4091
31.3673	87.1591
31.384	90.9091
31.4006	93.4091
31.4173	87.1591
31.434	95.9091
31.4506	93.4091
31.4673	92.1591
31.484	88.4091
31.5006	87.1591
31.5173	88.4091
31.534	88.4091
31.5506	88.4091
31.5673	87.1591
31.584	83.4091
31.6006	82.1591
31.6173	77.1591
31.634	82.1591
31.6506	82.1591
31.6673	89.6591
31.684	97.1591
31.7006	94.6591
31.7173	102.159
31.734	88.4091
31.7506	92.1591
31.7673	93.4091
31.784	95.9091
31.8006	97.1591
31.8173	93.4091
31.834	93.4091
31.8506	95.9091
31.8673	92.1591
31.884	93.4091
31.9006	93.4091
31.9173	97.1591
31.934	93.4091
31.9506	92.1591
31.9673	93.4091
31.984	92.1591
32.0006	92.1591
32.0173	100.909
32.034	100.909
32.0506	94.6591
32.0673	92.1591
32.084	89.6591
32.1006	84.6591
32.1173	87.1591
32.134	90.9091
32.1506	84.6591
32.1673	99.6591
32.184	88.4091
32.2006	98.4091
32.2173	99.6591
32.234	97.1591
32.2506	97.1591
32.2673	95.9091
32.284	94.6591
32.3006	95.9091
32.3173	92.1591
32.334	92.1591
32.3506	95.9091
32.3673	90.9091
32.384	92.1591
32.4006	97.1591
32.4173	95.9091
32.434	97.1591
32.4506	90.9091
32.4673	84.6591
32.484	90.9091
32.5007	92.1591
32.5173	92.1591
32.534	99.6591
32.5507	93.4091
32.5673	95.9091
32.584	88.4091
32.6007	90.9091
32.6173	92.1591
32.634	98.4091
32.6507	93.4091
32.6673	84.6591
32.684	93.4091
32.7007	90.9091
32.7173	92.1591
32.734	93.4091
32.7507	89.6591
32.7673	92.1591
32.784	92.1591
32.8007	95.9091
32.8173	87.1591
32.834	93.4091
32.8507	95.9091
32.8673	78.4091
32.884	89.6591
32.9007	89.6591
32.9173	88.4091
32.934	89.6591
32.9507	90.9091
32.9673	87.1591
32.984	84.6591
33.0007	89.6591
33.0173	84.6591
33.034	92.1591
33.0507	92.1591
33.0673	95.9091
33.084	83.4091
33.1007	90.9091
33.1173	87.1591
33.134	95.9091
33.1507	87.1591
33.1673	88.4091
33.184	98.4091
33.2007	97.1591
33.2173	93.4091
33.234	89.6591
33.2507	94.6591
33.2673	97.1591
33.284	88.4091
33.3007	90.9091
[truncated: 10,627 more rows]

## Sheet: Fig2-figsupp2c
RecQdH_Histo.x	RecQdH_Histo.d	fit_RecQdH_Histo.x	fit_RecQdH_Histo.d	'Peak 1'.x	'Peak 1'.d	'Peak 2'.x	'Peak 2'.d	'Peak 3'.x	'Peak 3'.d	'Peak 4'.x	'Peak 4'.d	'Peak 5'.x	'Peak 5'.d	'Peak 6'.x	'Peak 6'.d	'Peak 7'.x	'Peak 7'.d
2	509.208	2	517.643	2	0.537055	2	5.11727e-05	39.8588	2.49298e-09	58.4571	0.000832298	67.6199	0.00112024	100.067	1.23748	99.9777	6.73448e-12
4	438.026	2.35974	497.792	2.24816	0.606022	2.37124	6.88529e-05	40.0029	4.02141e-09	58.6878	0.00106263	67.8794	0.00143293	100.374	1.34697	100.33	1.02407e-11
6	328.29	2.71949	478.683	2.49632	0.682899	2.74249	9.23576e-05	40.1471	6.45565e-09	58.9184	0.00135335	68.1388	0.00182835	100.681	1.4649	100.681	1.55284e-11
8	268.541	3.07923	460.317	2.74448	0.768462	3.11373	0.000123506	40.2912	1.03135e-08	59.149	0.00171937	68.3983	0.0023271	100.988	1.59179	101.033	2.34799e-11
10	249.437	3.43897	442.694	2.99263	0.863548	3.48497	0.000164654	40.4354	1.63973e-08	59.3797	0.00217899	68.6578	0.00295454	101.295	1.7282	101.385	3.5403e-11
12	224.42	3.79872	425.813	3.24079	0.969054	3.85622	0.000218837	40.5795	2.59442e-08	59.6103	0.00275467	68.9172	0.00374184	101.602	1.87468	101.737	5.32299e-11
14	220.645	4.15846	409.67	3.48895	1.08594	4.22746	0.000289958	40.7237	4.08519e-08	59.8409	0.00347386	69.1767	0.00472715	101.909	2.03184	102.089	7.98075e-11
16	224.498	4.5182	394.26	3.73711	1.21525	4.59871	0.000383016	40.8678	6.40157e-08	60.0716	0.00437003	69.4362	0.0059571	102.216	2.20029	102.441	1.19318e-10
18	240.255	4.87794	379.576	3.98527	1.35806	4.96995	0.000504388	41.012	9.98304e-08	60.3022	0.00548383	69.6956	0.00748841	102.523	2.38067	102.793	1.77885e-10
20	243.078	5.23769	365.613	4.23343	1.51556	5.34119	0.000662183	41.1561	1.54932e-07	60.5329	0.00686454	69.9551	0.00938998	102.83	2.57362	103.145	2.64451e-10
22	247.091	5.59743	352.36	4.48159	1.68897	5.71244	0.000866679	41.3003	2.39289e-07	60.7635	0.00857171	70.2146	0.0117452	103.137	2.77984	103.496	3.92035e-10
24	270.208	5.95717	339.81	4.72975	1.87962	6.08368	0.00113085	41.4444	3.67796e-07	60.9941	0.0106771	70.474	0.0146546	103.444	3	103.848	5.79531e-10
26	284.03	6.31692	327.952	4.9779	2.0889	6.45492	0.00147101	41.5886	5.62592e-07	61.2248	0.0132668	70.7335	0.0182394	103.751	3.23484	104.2	8.54282e-10
28	268.749	6.67666	316.776	5.22606	2.31826	6.82617	0.00190764	41.7327	8.56411e-07	61.4554	0.0164439	70.993	0.0226447	104.058	3.48507	104.552	1.25574e-09
30	254.558	7.0364	306.27	5.47422	2.56923	7.19741	0.00246627	41.8769	1.2974e-06	61.6861	0.0203317	71.2525	0.0280441	104.365	3.75144	104.904	1.84064e-09
32	260.939	7.39615	296.423	5.72238	2.84343	7.56865	0.00317871	42.021	1.95599e-06	61.9167	0.0250768	71.5119	0.0346447	104.672	4.03471	105.256	2.69037e-09
34	269.429	7.75589	287.222	5.97054	3.14254	7.9399	0.00408441	42.1651	2.93469e-06	62.1473	0.030853	71.7714	0.0426925	104.979	4.33567	105.608	3.92127e-09
36	263.316	8.11563	278.657	6.2187	3.4683	8.31114	0.00523206	42.3093	4.38189e-06	62.378	0.0378662	72.0309	0.0524792	105.286	4.65507	105.96	5.69922e-09
38	257.307	8.47537	270.713	6.46686	3.82252	8.68239	0.00668163	42.4534	6.51121e-06	62.6086	0.046359	72.2903	0.0643492	105.592	4.99374	106.311	8.25993e-09
40	232.203	8.83512	263.378	6.71501	4.20708	9.05363	0.00850664	42.5976	9.62865e-06	62.8393	0.0566167	72.5498	0.078708	105.899	5.35245	106.663	1.19374e-08
42	228.671	9.19486	256.639	6.96317	4.62391	9.42487	0.0107969	42.7417	1.417e-05	63.0699	0.0689736	72.8093	0.0960316	106.206	5.73202	107.015	1.72035e-08
44	228.558	9.5546	250.484	7.21133	5.075	9.79612	0.0136618	42.8859	2.07529e-05	63.3005	0.0838205	73.0687	0.116877	106.513	6.13326	107.367	2.47227e-08
46	205.035	9.91435	244.897	7.45949	5.56238	10.1674	0.0172339	43.03	3.02475e-05	63.5312	0.101612	73.3282	0.141895	106.82	6.55696	107.719	3.54281e-08
48	168.294	10.2741	239.867	7.70765	6.08811	10.5386	0.0216733	43.1742	4.38735e-05	63.7618	0.122877	73.5877	0.171839	107.127	7.00393	108.071	5.06258e-08
50	162.632	10.6338	235.378	7.95581	6.65431	10.9098	0.0271726	43.3183	6.33312e-05	63.9925	0.148225	73.8471	0.207586	107.434	7.47496	108.423	7.21389e-08
52	196.952	10.9936	231.416	8.20397	7.26308	11.2811	0.0339629	43.4625	9.09779e-05	64.2231	0.178361	74.1066	0.250146	107.741	7.97085	108.774	1.02504e-07
54	210.13	11.3533	227.967	8.45213	7.91657	11.6523	0.0423199	43.6066	0.000130064	64.4537	0.214096	74.3661	0.300683	108.048	8.49235	109.126	1.45239e-07
56	185.628	11.7131	225.016	8.70028	8.61689	12.0236	0.0525715	43.7508	0.000185046	64.6844	0.256357	74.6256	0.360533	108.355	9.04023	109.478	2.0521e-07
58	162.368	12.0728	222.547	8.94844	9.36617	12.3948	0.0651062	43.8949	0.000262002	64.915	0.306204	74.885	0.431223	108.662	9.61522	109.83	2.89125e-07
60	157.177	12.4325	220.543	9.1966	10.1665	12.7661	0.0803824	44.0391	0.000369174	65.1456	0.364841	75.1445	0.514491	108.969	10.218	110.182	4.06206e-07
62	155.723	12.7923	218.988	9.44476	11.0199	13.1373	0.0989385	44.1832	0.00051768	65.3763	0.433636	75.404	0.612314	109.276	10.8493	110.534	5.69089e-07
64	162.671	13.152	217.863	9.69292	11.9284	13.5086	0.121405	44.3274	0.000722427	65.6069	0.514132	75.6634	0.726926	109.583	11.5098	110.886	7.95035e-07
66	172.615	13.5118	217.151	9.94108	12.8939	13.8798	0.148516	44.4715	0.00100329	65.8376	0.608069	75.9229	0.860848	109.89	12.2	111.238	1.10756e-06
68	175.727	13.8715	216.832	10.1892	13.9183	14.251	0.181124	44.6157	0.00138665	66.0682	0.717396	76.1824	1.01691	110.197	12.9205	111.589	1.53857e-06
70	175.126	14.2313	216.885	10.4374	15.0032	14.6223	0.220214	44.7598	0.00190724	66.2988	0.844294	76.4418	1.19828	110.504	13.6718	111.941	2.13128e-06
72	166.537	14.591	217.289	10.6856	16.1503	14.9935	0.26692	44.904	0.00261064	66.5295	0.991188	76.7013	1.4085	110.811	14.4545	112.293	2.94401e-06
74	188.68	14.9507	218.021	10.9337	17.361	15.3648	0.32254	45.0481	0.00355625	66.7601	1.16077	76.9608	1.65148	111.118	15.2688	112.645	4.05516e-06
76	228.329	15.3105	219.059	11.1819	18.6366	15.736	0.388554	45.1923	0.00482102	66.9908	1.35602	77.2202	1.93156	111.425	16.1153	112.997	5.56995e-06
78	270.121	15.6702	220.378	11.43	19.9782	16.1073	0.466644	45.3364	0.00650412	67.2214	1.58021	77.4797	2.25354	111.732	16.9941	113.349	7.62898e-06
80	307.922	16.03	221.953	11.6782	21.3867	16.4785	0.55871	45.4806	0.00873254	67.452	1.83692	77.7392	2.62266	112.039	17.9055	113.701	1.04197e-05
82	351.42	16.3897	223.757	11.9263	22.8628	16.8497	0.666888	45.6247	0.011668	67.6827	2.13007	77.9987	3.04466	112.346	18.8496	114.053	1.41911e-05
84	338.623	16.7495	225.763	12.1745	24.4069	17.221	0.793572	45.7689	0.015515	67.9133	2.46392	78.2581	3.52579	112.653	19.8266	114.404	1.9273e-05
86	326.017	17.1092	227.945	12.4227	26.0192	17.5922	0.941424	45.913	0.020531	68.144	2.84306	78.5176	4.0728	112.96	20.8363	114.756	2.61008e-05
88	338.039	17.469	230.273	12.6708	27.6995	17.9635	1.1134	46.0572	0.0270378	68.3746	3.27247	78.7771	4.69299	113.267	21.8786	115.108	3.52479e-05
90	377.299	17.8287	232.719	12.919	29.4476	18.3347	1.31275	46.2013	0.0354353	68.6052	3.75745	79.0365	5.3942	113.574	22.9535	115.46	4.74662e-05
92	409.957	18.1884	235.256	13.1671	31.2625	18.706	1.54305	46.3455	0.0462171	68.8359	4.30366	79.296	6.18477	113.881	24.0606	115.812	6.37396e-05
94	412.913	18.5482	237.854	13.4153	33.1433	19.0772	1.80819	46.4896	0.059989	69.0665	4.91713	79.5555	7.07361	114.188	25.1994	116.164	8.53505e-05
96	362.935	18.9079	240.486	13.6635	35.0886	19.4485	2.11239	46.6338	0.0774895	69.2972	5.6042	79.8149	8.07008	114.495	26.3696	116.516	0.000113966
98	315.619	19.2677	243.123	13.9116	37.0966	19.8197	2.46021	46.7779	0.0996131	69.5278	6.37153	80.0744	9.18407	114.802	27.5705	116.868	0.000151746
100	291.628	19.6274	245.74	14.1598	39.1651	20.1909	2.8565	46.9221	0.127436	69.7584	7.22607	80.3339	10.4259	115.109	28.8014	117.219	0.000201481
102	283.069	19.9872	248.31	14.4079	41.2918	20.5622	3.30646	47.0662	0.162245	69.9891	8.17502	80.5933	11.8062	115.416	30.0614	117.571	0.00026676
104	278.255	20.3469	250.81	14.6561	43.4735	20.9334	3.81557	47.2104	0.205566	70.2197	9.2258	80.8528	13.336	115.723	31.3498	117.923	0.000352194
106	254.567	20.7066	253.216	14.9043	45.7071	21.3047	4.38955	47.3545	0.2592	70.4503	10.386	81.1123	15.0267	116.03	32.6654	118.275	0.000463677
108	248.978	21.0664	255.508	15.1524	47.9889	21.6759	5.03441	47.4987	0.325253	70.681	11.6632	81.3717	16.8897	116.337	34.0071	118.627	0.000608725
110	285.965	21.4261	257.668	15.4006	50.3148	22.0472	5.75628	47.6428	0.406172	70.9116	13.0653	81.6312	18.9365	116.644	35.3735	118.979	0.000796893
112	293.359	21.7859	259.679	15.6487	52.6803	22.4184	6.56149	47.787	0.504778	71.1423	14.5998	81.8907	21.1786	116.951	36.7634	119.331	0.00104028
114	247.532	22.1456	261.527	15.8969	55.0807	22.7896	7.45639	47.9311	0.6243	71.3729	16.2743	82.1502	23.6273	117.258	38.1752	119.682	0.00135418
116	229.58	22.5054	263.202	16.145	57.5105	23.1609	8.44737	48.0753	0.768403	71.6035	18.0962	82.4096	26.2937	117.565	39.6072	120.034	0.00175781
118	233.788	22.8651	264.693	16.3932	59.9644	23.5321	9.5407	48.2194	0.941211	71.8342	20.0724	82.6691	29.1884	117.872	41.0578	120.386	0.00227532
120	228.273	23.2248	265.997	16.6414	62.4364	23.9034	10.7425	48.3636	1.14733	72.0648	22.2096	82.9286	32.3212	118.179	42.5251	120.738	0.00293687
122	221.615	23.5846	267.111	16.8895	64.9201	24.2746	12.0586	48.5077	1.39184	72.2955	24.5138	83.188	35.7014	118.486	44.0071	121.09	0.00378006
124	234.887	23.9443	268.033	17.1377	67.4092	24.6459	13.4944	48.6519	1.68033	72.5261	26.9903	83.4475	39.3372	118.793	45.5018	121.442	0.00485162
126	224.71	24.3041	268.768	17.3858	69.8967	25.0171	15.0549	48.796	2.01885	72.7567	29.6438	83.707	43.2356	119.1	47.0069	121.794	0.00620936
128	235.524	24.6638	269.32	17.634	72.3755	25.3883	16.7443	48.9402	2.41387	72.9874	32.4779	83.9664	47.4023	119.407	48.5203	122.146	0.00792465
130	233.823	25.0236	269.699	17.8822	74.8385	25.7596	18.5663	49.0843	2.87227	73.218	35.4953	84.2259	51.8415	119.714	50.0396	122.497	0.0100852
132	207.563	25.3833	269.913	18.1303	77.278	26.1308	20.5233	49.2285	3.40127	73.4487	38.6974	84.4854	56.5556	120.021	51.5622	122.849	0.0127987
134	186.537	25.743	269.975	18.3785	79.6865	26.5021	22.617	49.3726	4.00828	73.6793	42.0844	84.7448	61.5452	120.328	53.0857	123.201	0.0161963
136	228.32	26.1028	269.9	18.6266	82.0562	26.8733	24.8479	49.5168	4.70087	73.9099	45.655	85.0043	66.8086	120.635	54.6074	123.553	0.0204381
138	257.853	26.4625	269.702	18.8748	84.3792	27.2446	27.2152	49.6609	5.48656	74.1406	49.4064	85.2638	72.342	120.942	56.1246	123.905	0.025718
140	277.775	26.8223	269.399	19.1229	86.6478	27.6158	29.7166	49.8051	6.37272	74.3712	53.3344	85.5233	78.1392	121.249	57.6346	124.257	0.0322705
142	311.974	27.182	269.008	19.3711	88.8542	27.9871	32.3484	49.9492	7.36635	74.6019	57.4327	85.7827	84.1913	121.556	59.1346	124.609	0.0403783
144	328.225	27.5418	268.546	19.6193	90.9904	28.3583	35.1053	50.0934	8.47387	74.8325	61.6935	86.0422	90.4869	121.863	60.6217	124.961	0.0503806
146	334.069	27.9015	268.032	19.8674	93.0489	28.7295	37.9803	50.2375	9.70094	75.0631	66.1071	86.3017	97.0117	122.17	62.0929	125.312	0.0626831
148	373.645	28.2612	267.483	20.1156	95.0222	29.1008	40.9648	50.3817	11.0522	75.2938	70.6618	86.5611	103.749	122.477	63.5455	125.664	0.0777698
150	406.991	28.621	266.916	20.3637	96.9028	29.472	44.0483	50.5258	12.531	75.5244	75.3442	86.8206	110.678	122.784	64.9763	126.016	0.0962152
152	388.766	28.9807	266.345	20.6119	98.6837	29.8433	47.2187	50.67	14.1392	75.755	80.1389	87.0801	117.777	123.091	66.3825	126.368	0.1187
154	362.355	29.3405	265.786	20.8601	100.358	30.2145	50.4621	50.8141	15.8769	75.9857	85.0286	87.3395	125.02	123.398	67.761	126.72	0.146025
156	378.351	29.7002	265.251	21.1082	101.919	30.5858	53.7629	50.9583	17.7423	76.2163	89.9943	87.599	132.378	123.705	69.109	127.072	0.179134
158	391.39	30.06	264.751	21.3564	103.362	30.957	57.1039	51.1024	19.7313	76.447	95.0152	87.8585	139.822	124.012	70.4234	127.424	0.219131
160	364.078	30.4197	264.293	21.6045	104.679	31.3282	60.4666	51.2466	21.8376	76.6776	100.069	88.1179	147.318	124.319	71.7015	127.776	0.2673
162	259.779	30.7794	263.884	21.8527	105.867	31.6995	63.831	51.3907	24.0523	76.9082	105.132	88.3774	154.83	124.626	72.9402	128.127	0.325139
164	144.346	31.1392	263.528	22.1009	106.919	32.0707	67.1759	51.5349	26.364	77.1389	110.179	88.6369	162.32	124.933	74.1368	128.479	0.394376
166	60.5671	31.4989	263.226	22.349	107.832	32.442	70.4793	51.679	28.7586	77.3695	115.183	88.8964	169.751	125.24	75.2885	128.831	0.477008
168	22.8442	31.8587	262.977	22.5972	108.603	32.8132	73.7185	51.8232	31.2195	77.6002	120.118	89.1558	177.081	125.547	76.3926	129.183	0.575325
170	6.34632	32.2184	262.776	22.8453	109.227	33.1845	76.8701	51.9673	33.7277	77.8308	124.956	89.4153	184.268	125.854	77.4466	129.535	0.691947
		32.5782	262.617	23.0935	109.703	33.5557	79.9106	52.1115	36.2619	78.0614	129.668	89.6748	191.271	126.161	78.4479	129.887	0.829862
		32.9379	262.493	23.3416	110.028	33.927	82.8166	52.2556	38.7987	78.2921	134.226	89.9342	198.047	126.468	79.3942	130.239	0.992456
		33.2976	262.392	23.5898	110.201	34.2982	85.5652	52.3998	41.3128	78.5227	138.602	90.1937	204.554	126.775	80.2831	130.59	1.18356
		33.6574	262.302	23.838	110.222	34.6694	88.1338	52.5439	43.778	78.7534	142.767	90.4532	210.75	127.082	81.1124	130.942	1.40748
		34.0171	262.21	24.0861	110.089	35.0407	90.5012	52.6881	46.1667	78.984	146.696	90.7126	216.594	127.389	81.8801	131.294	1.66903
		34.3769	262.101	24.3343	109.805	35.4119	92.6473	52.8322	48.4512	79.2146	150.361	90.9721	222.048	127.696	82.5844	131.646	1.97361
		34.7366	261.957	24.5824	109.369	35.7832	94.5534	52.9764	50.6038	79.4453	153.738	91.2316	227.073	128.003	83.2234	131.998	2.32718
		35.0964	261.764	24.8306	108.785	36.1544	96.2028	53.1205	52.5973	79.6759	156.803	91.491	231.635	128.31	83.7955	132.35	2.73635
		35.4561	261.504	25.0788	108.053	36.5257	97.5808	53.2647	54.406	79.9066	159.535	91.7505	235.703	128.617	84.2994	132.702	3.20838
		35.8158	261.16	25.3269	107.178	36.8969	98.6751	53.4088	56.0057	80.1372	161.915	92.01	239.246	128.924	84.7337	133.054	3.75123
		36.1756	260.717	25.5751	106.163	37.2681	99.4757	53.553	57.3746	80.3678	163.925	92.2694	242.239	129.231	85.0973	133.405	4.37355
		36.5353	260.158	25.8232	105.011	37.6394	99.9752	53.6971	58.4938	80.5985	165.552	92.5289	244.661	129.538	85.3893	133.757	5.08471
		36.8951	259.469	26.0714	103.728	38.0106	100.169	53.8413	59.3476	80.8291	166.782	92.7884	246.493	129.845	85.609	134.109	5.89484
		37.2548	258.638	26.3196	102.319	38.3819	100.056	53.9854	59.9236	81.0597	167.607	93.0479	247.721	130.152	85.7557	134.461	6.81475
		37.6146	257.652	26.5677	100.789	38.7531	99.636	54.1296	60.2137	81.2904	168.021	93.3073	248.338	130.459	85.8292	134.813	7.85599
		37.9743	256.502	26.8159	99.1442	39.1244	98.9138	54.2737	60.2137	81.521	168.021	93.5668	248.338	130.766	85.8292	135.165	9.03076
		38.334	255.182	27.064	97.3912	39.4956	97.8957	54.4179	59.9236	81.7517	167.607	93.8263	247.721	131.073	85.7557	135.517	10.3519
		38.6938	253.684	27.3122	95.5367	39.8669	96.5909	54.562	59.3476	81.9823	166.782	94.0857	246.493	131.38	85.609	135.869	11.8329
		39.0535	252.006	27.5603	93.5876	40.2381	95.0113	54.7062	58.4938	82.2129	165.552	94.3452	244.661	131.687	85.3893	136.22	13.4875
		39.4133	250.148	27.8085	91.5513	40.6093	93.171	54.8503	57.3746	82.4436	163.925	94.6047	242.239	131.994	85.0973	136.572	15.3301
		39.773	248.11	28.0567	89.4352	40.9806	91.0862	54.9945	56.0057	82.6742	161.915	94.8641	239.246	132.301	84.7337	136.924	17.3753
		40.1328	245.896	28.3048	87.2469	41.3518	88.7749	55.1386	54.406	82.9049	159.535	95.1236	235.703	132.608	84.2994	137.276	19.6378
		40.4925	243.512	28.553	84.9943	41.7231	86.257	55.2828	52.5973	83.1355	156.803	95.3831	231.635	132.915	83.7955	137.628	22.1322
		40.8522	240.967	28.8011	82.6851	42.0943	83.5535	55.4269	50.6038	83.3661	153.738	95.6425	227.073	133.222	83.2234	137.98	24.8731
		41.212	238.269	29.0493	80.3271	42.4656	80.6865	55.571	48.4512	83.5968	150.361	95.902	222.048	133.529	82.5844	138.332	27.8746
		41.5717	235.432	29.2975	77.9283	42.8368	77.679	55.7152	46.1667	83.8274	146.696	96.1615	216.594	133.836	81.8801	138.684	31.1501
		41.9315	232.467	29.5456	75.4964	43.208	74.5543	55.8593	43.778	84.0581	142.767	96.421	210.75	134.143	81.1124	139.035	34.7122
		42.2912	229.389	29.7938	73.039	43.5793	71.3358	56.0035	41.3128	84.2887	138.602	96.6804	204.554	134.45	80.2831	139.387	38.5726
		42.651	226.215	30.0419	70.5637	43.9505	68.047	56.1476	38.7987	84.5193	134.226	96.9399	198.047	134.756	79.3942	139.739	42.7413
		43.0107	222.96	30.2901	68.0778	44.3218	64.7108	56.2918	36.2619	84.75	129.668	97.1994	191.271	135.063	78.4479	140.091	47.2269
		43.3704	219.641	30.5382	65.5885	44.693	61.3494	56.4359	33.7277	84.9806	124.956	97.4588	184.268	135.37	77.4466	140.443	52.0359
		43.7302	216.277	30.7864	63.1026	45.0643	57.9843	56.5801	31.2195	85.2113	120.118	97.7183	177.081	135.677	76.3926	140.795	57.1729
		44.0899	212.884	31.0346	60.6269	45.4355	54.6357	56.7242	28.7586	85.4419	115.183	97.9778	169.751	135.984	75.2885	141.147	62.6398
		44.4497	209.481	31.2827	58.1676	45.8067	51.3227	56.8684	26.364	85.6725	110.179	98.2372	162.32	136.291	74.1368	141.498	68.4357
		44.8094	206.083	31.5309	55.7307	46.178	48.0627	57.0125	24.0523	85.9032	105.132	98.4967	154.83	136.598	72.9402	141.85	74.5569
		45.1692	202.71	31.779	53.3219	46.5492	44.8718	57.1567	21.8376	86.1338	100.069	98.7562	147.318	136.905	71.7015	142.202	80.9964
		45.5289	199.376	32.0272	50.9465	46.9205	41.7642	57.3008	19.7313	86.3644	95.0152	99.0156	139.822	137.212	70.4234	142.554	87.7437
		45.8887	196.1	32.2754	48.6095	47.2917	38.7527	57.445	17.7423	86.5951	89.9943	99.2751	132.378	137.519	69.109	142.906	94.785
		46.2484	192.9	32.5235	46.3155	47.663	35.848	57.5891	15.8769	86.8257	85.0286	99.5346	125.02	137.826	67.761	143.258	102.102
		46.6081	189.794	32.7717	44.0685	48.0342	33.0594	57.7333	14.1392	87.0564	80.1389	99.794	117.777	138.133	66.3825	143.61	109.674
		46.9679	186.807	33.0198	41.8725	48.4055	30.3943	57.8774	12.531	87.287	75.3442	100.054	110.678	138.44	64.9763	143.962	117.475
		47.3276	183.966	33.268	39.7308	48.7767	27.8582	58.0216	11.0522	87.5176	70.6618	100.313	103.749	138.747	63.5455	144.313	125.476
		47.6874	181.31	33.5162	37.6464	49.1479	25.4555	58.1657	9.70094	87.7483	66.1071	100.572	97.0117	139.054	62.0929	144.665	133.643
		48.0471	178.886	33.7643	35.6219	49.5192	23.1887	58.3099	8.47387	87.9789	61.6935	100.832	90.4869	139.361	60.6217	145.017	141.94
		48.4069	176.758	34.0125	33.6596	49.8904	21.059	58.454	7.36635	88.2096	57.4327	101.091	84.1913	139.668	59.1346	145.369	150.327
		48.7666	175.007	34.2606	31.7613	50.2617	19.0663	58.5982	6.37272	88.4402	53.3344	101.351	78.1392	139.975	57.6346	145.721	158.761
		49.1263	173.729	34.5088	29.9285	50.6329	17.2091	58.7423	5.48656	88.6708	49.4064	101.61	72.342	140.282	56.1246	146.073	167.194
		49.4861	173.035	34.7569	28.1625	51.0042	15.4853	58.8865	4.70087	88.9015	45.655	101.87	66.8086	140.589	54.6074	146.425	175.579
		49.8458	173.042	35.0051	26.4639	51.3754	13.8914	59.0306	4.00828	89.1321	42.0844	102.129	61.5452	140.896	53.0857	146.777	183.863
		50.2056	173.859	35.2533	24.8333	51.7466	12.4233	59.1748	3.40127	89.3628	38.6974	102.389	56.5556	141.203	51.5622	147.128	191.995
		50.5653	175.57	35.5014	23.2709	52.1179	11.0763	59.3189	2.87227	89.5934	35.4953	102.648	51.8415	141.51	50.0396	147.48	199.921
		50.9251	178.21	35.7496	21.7766	52.4891	9.84509	59.4631	2.41387	89.824	32.4779	102.908	47.4023	141.817	48.5203	147.832	207.587
		51.2848	181.745	35.9977	20.35	52.8604	8.7239	59.6072	2.01885	90.0547	29.6438	103.167	43.2356	142.124	47.0069	148.184	214.939
		51.6445	186.051	36.2459	18.9905	53.2316	7.70668	59.7514	1.68033	90.2853	26.9903	103.427	39.3372	142.431	45.5018	148.536	221.922
		52.0043	190.906	36.4941	17.6972	53.6029	6.7872	59.8955	1.39184	90.516	24.5138	103.686	35.7014	142.738	44.0071	148.888	228.486
		52.364	195.991	36.7422	16.4692	53.9741	5.9591	60.0397	1.14733	90.7466	22.2096	103.946	32.3212	143.045	42.5251	149.24	234.581
		52.7238	200.916	36.9904	15.3052	54.3454	5.21598	60.1838	0.941211	90.9772	20.0724	104.205	29.1884	143.352	41.0578	149.591	240.158
		53.0835	205.25	37.2385	14.2037	54.7166	4.55154	60.328	0.768403	91.2079	18.0962	104.464	26.2937	143.659	39.6072	149.943	245.174
		53.4433	208.571	37.4867	13.1632	55.0878	3.95955	60.4721	0.6243	91.4385	16.2743	104.724	23.6273	143.966	38.1752	150.295	249.589
		53.803	210.522	37.7348	12.1821	55.4591	3.434	60.6163	0.504778	91.6691	14.5998	104.983	21.1786	144.273	36.7634	150.647	253.366
		54.1627	210.854	37.983	11.2585	55.8303	2.96908	60.7604	0.406172	91.8998	13.0653	105.243	18.9365	144.58	35.3735	150.999	256.474
		54.5225	209.466	38.2312	10.3904	56.2016	2.55922	60.9046	0.325253	92.1304	11.6632	105.502	16.8897	144.887	34.0071	151.351	258.888
		54.8822	206.413	38.4793	9.57604	56.5728	2.19918	61.0487	0.2592	92.3611	10.386	105.762	15.0267	145.194	32.6654	151.703	260.587
		55.242	201.904	38.7275	8.81325	56.9441	1.884	61.1929	0.205566	92.5917	9.2258	106.021	13.336	145.501	31.3498	152.055	261.558
		55.6017	196.265	38.9756	8.09999	57.3153	1.60904	61.337	0.162245	92.8223	8.17502	106.281	11.8062	145.808	30.0614	152.406	261.791
		55.9615	189.897	39.2238	7.43413	57.6865	1.36999	61.4812	0.127436	93.053	7.22607	106.54	10.4259	146.115	28.8014	152.758	261.284
		56.3212	183.223	39.472	6.81356	58.0578	1.16288	61.6253	0.0996131	93.2836	6.37153	106.8	9.18407	146.422	27.5705	153.11	260.043
		56.6809	176.635	39.7201	6.23614	58.429	0.984057	61.7695	0.0774895	93.5143	5.6042	107.059	8.07008	146.729	26.3696	153.462	258.077
		57.0407	170.461	39.9683	5.69974	58.8003	0.830177	61.9136	0.059989	93.7449	4.91713	107.319	7.07361	147.036	25.1994	153.814	255.404
		57.4004	164.936	40.2164	5.20226	59.1715	0.698212	62.0578	0.0462171	93.9755	4.30366	107.578	6.18477	147.343	24.0606	154.166	252.045
		57.7602	160.197	40.4646	4.74163	59.5428	0.585424	62.2019	0.0354353	94.2062	3.75745	107.838	5.3942	147.65	22.9535	154.518	248.028
		58.1199	156.289	40.7128	4.31579	59.914	0.48935	62.3461	0.0270378	94.4368	3.27247	108.097	4.69299	147.957	21.8786	154.87	243.386
		58.4797	153.184	40.9609	3.92275	60.2853	0.407789	62.4902	0.020531	94.6675	2.84306	108.357	4.0728	148.264	20.8363	155.221	238.157
		58.8394	150.804	41.2091	3.56057	60.6565	0.338779	62.6344	0.015515	94.8981	2.46392	108.616	3.52579	148.571	19.8266	155.573	232.383
		59.1991	149.038	41.4572	3.22735	61.0277	0.280585	62.7785	0.011668	95.1287	2.13007	108.875	3.04466	148.878	18.8496	155.925	226.11
		59.5589	147.768	41.7054	2.92126	61.399	0.231675	62.9227	0.00873254	95.3594	1.83692	109.135	2.62266	149.185	17.9055	156.277	219.384
		59.9186	146.882	41.9535	2.64054	61.7702	0.190704	63.0668	0.00650412	95.59	1.58021	109.394	2.25354	149.492	16.9941	156.629	212.258
		60.2784	146.279	42.2017	2.38348	62.1415	0.156497	63.211	0.00482102	95.8207	1.35602	109.654	1.93156	149.799	16.1153	156.981	204.784
		60.6381	145.878	42.4499	2.14847	62.5127	0.128032	63.3551	0.00355625	96.0513	1.16077	109.913	1.65148	150.106	15.2688	157.333	197.016
		60.9979	145.617	42.698	1.93395	62.884	0.104423	63.4993	0.00261064	96.2819	0.991188	110.173	1.4085	150.413	14.4545	157.685	189.007
		61.3576	145.449	42.9462	1.73843	63.2552	0.0849068	63.6434	0.00190724	96.5126	0.844294	110.432	1.19828	150.72	13.6718	158.036	180.812
		61.7173	145.342	43.1943	1.56052	63.6264	0.0688262	63.7876	0.00138665	96.7432	0.717396	110.692	1.01691	151.027	12.9205	158.388	172.485
		62.0771	145.276	43.4425	1.39887	63.9977	0.0556201	63.9317	0.00100329	96.9738	0.608069	110.951	0.860848	151.334	12.2	158.74	164.076
		62.4368	145.236	43.6907	1.25223	64.3689	0.04481	64.0759	0.000722427	97.2045	0.514132	111.211	0.726926	151.641	11.5098	159.092	155.638
		62.7966	145.215	43.9388	1.11941	64.7402	0.0359903	64.22	0.00051768	97.4351	0.433636	111.47	0.612314	151.948	10.8493	159.444	147.216
		63.1563	145.209	44.187	0.999291	65.1114	0.0288179	64.3642	0.000369174	97.6658	0.364841	111.73	0.514491	152.255	10.218	159.796	138.857
		63.5161	145.216	44.4351	0.890825	65.4827	0.023004	64.5083	0.000262002	97.8964	0.306204	111.989	0.431223	152.562	9.61522	160.148	130.604
		63.8758	145.236	44.6833	0.793032	65.8539	0.0183068	64.6525	0.000185046	98.127	0.256357	112.249	0.360533	152.869	9.04023	160.499	122.494
		64.2355	145.269	44.9315	0.704995	66.2252	0.0145241	64.7966	0.000130064	98.3577	0.214096	112.508	0.300683	153.176	8.49235	160.851	114.563
		64.5953	145.319	45.1796	0.625864	66.5964	0.0114876	64.9408	9.09779e-05	98.5883	0.178361	112.768	0.250146	153.483	7.97085	161.203	106.844
		64.955	145.388	45.4278	0.554845	66.9676	0.00905809	65.0849	6.33312e-05	98.819	0.148225	113.027	0.207586	153.79	7.47496	161.555	99.3636
		65.3148	145.48	45.6759	0.491203	67.3389	0.0071205	65.2291	4.38735e-05	99.0496	0.122877	113.286	0.171839	154.097	7.00393	161.907	92.1462
		65.6745	145.601	45.9241	0.434258	67.7101	0.00558021	65.3732	3.02475e-05	99.2802	0.101612	113.546	0.141895	154.404	6.55696	162.259	85.2118
		66.0343	145.757	46.1722	0.383383	68.0814	0.0043597	65.5174	2.07529e-05	99.5109	0.0838205	113.805	0.116877	154.711	6.13326	162.611	78.5769
		66.394	145.956	46.4204	0.337999	68.4526	0.0033957	65.6615	1.417e-05	99.7415	0.0689736	114.065	0.0960316	155.018	5.73202	162.963	72.2542
		66.7537	146.207	46.6686	0.297575	68.8239	0.00263674	65.8057	9.62865e-06	99.9722	0.0566167	114.324	0.078708	155.325	5.35245	163.314	66.2527
		67.1135	146.52	46.9167	0.261622	69.1951	0.00204114	65.9498	6.51121e-06	100.203	0.046359	114.584	0.0643492	155.632	4.99374	163.666	60.5783
		67.4732	146.91	47.1649	0.229695	69.5663	0.00157523	66.094	4.38189e-06	100.433	0.0378662	114.843	0.0524792	155.939	4.65507	164.018	55.2336
		67.833	147.389	47.413	0.201384	69.9376	0.00121194	66.2381	2.93469e-06	100.664	0.030853	115.103	0.0426925	156.246	4.33567	164.37	50.2183
		68.1927	147.975	47.6612	0.176318	70.3088	0.000929575	66.3823	1.95599e-06	100.895	0.0250768	115.362	0.0346447	156.553	4.03471	164.722	45.5296
		68.5525	148.687	47.9094	0.154158	70.6801	0.000710811	66.5264	1.2974e-06	101.125	0.0203317	115.622	0.0280441	156.86	3.75144	165.074	41.1622
		68.9122	149.545	48.1575	0.134597	71.0513	0.000541864	66.6706	8.56411e-07	101.356	0.0164439	115.881	0.0226447	157.167	3.48507	165.426	37.1086
		69.2719	150.572	48.4057	0.117355	71.4226	0.000411806	66.8147	5.62592e-07	101.587	0.0132668	116.141	0.0182394	157.474	3.23484	165.778	33.3599
		69.6317	151.794	48.6538	0.102179	71.7938	0.000312004	66.9589	3.67796e-07	101.817	0.0106771	116.4	0.0146546	157.781	3	166.129	29.9052
		69.9914	153.236	48.902	0.0888433	72.165	0.000235665	67.103	2.39289e-07	102.048	0.00857171	116.66	0.0117452	158.088	2.77984	166.481	26.7327
		70.3512	154.927	49.1501	0.0771407	72.5363	0.000177458	67.2472	1.54932e-07	102.279	0.00686454	116.919	0.00938998	158.395	2.57362	166.833	23.8292
		70.7109	156.897	49.3983	0.0668867	72.9075	0.000133218	67.3913	9.98304e-08	102.509	0.00548383	117.178	0.00748841	158.702	2.38067	167.185	21.1812
		71.0707	159.173	49.6465	0.0579155	73.2788	9.97003e-05	67.5355	6.40157e-08	102.74	0.00437003	117.438	0.0059571	159.009	2.20029	167.537	18.7743
		71.4304	161.787	49.8946	0.050078	73.65	7.43869e-05	67.6796	4.08519e-08	102.97	0.00347386	117.697	0.00472715	159.316	2.03184	167.889	16.594
		71.7901	164.767	50.1428	0.0432411	74.0213	5.53302e-05	67.8238	2.59442e-08	103.201	0.00275467	117.957	0.00374184	159.623	1.87468	168.241	14.6254
		72.1499	168.138	50.3909	0.0372859	74.3925	4.10293e-05	67.9679	1.63973e-08	103.432	0.00217899	118.216	0.00295454	159.93	1.7282	168.593	12.8541
		72.5096	171.924	50.6391	0.0321064	74.7638	3.03314e-05	68.1121	1.03135e-08	103.662	0.00171937	118.476	0.0023271	160.237	1.59179	168.944	11.2653
		72.8694	176.146	50.8873	0.027608	75.135	2.23541e-05	68.2562	6.45565e-09	103.893	0.00135335	118.735	0.00182835	160.544	1.4649	169.296	9.84513
		73.2291	180.817	51.1354	0.023707	75.5062	1.64243e-05	68.4004	4.02141e-09	104.124	0.00106263	118.995	0.00143293	160.851	1.34697	169.648	8.57967
		73.5889	185.946	51.3836	0.020329	75.8775	1.20305e-05	68.5445	2.49298e-09	104.354	0.000832298	119.254	0.00112024	161.158	1.23748	170	7.45578
		73.9486	191.535
		74.3084	197.575
		74.6681	204.052
		75.0278	210.938
		75.3876	218.198
		75.7473	225.785
		76.1071	233.643
		76.4668	241.706
		76.8266	249.901
		77.1863	258.145
		77.546	266.351
		77.9058	274.43
		78.2655	282.291
		78.6253	289.843
		78.985	297.002
		79.3448	303.689
		79.7045	309.835
		80.0642	315.383
		80.424	320.29
		80.7837	324.53
		81.1435	328.092
		81.5032	330.987
		81.863	333.239
		82.2227	334.894
		82.5824	336.012
		82.9422	336.669
		83.3019	336.954
		83.6617	336.965
		84.0214	336.808
		84.3812	336.589
		84.7409	336.419
		85.1006	336.4
		85.4604	336.629
		85.8201	337.193
		86.1799	338.164
		86.5396	339.597
		86.8994	341.531
		87.2591	343.984
		87.6188	346.954
		87.9786	350.419
		88.3383	354.336
		88.6981	358.645
		89.0578	363.268
		89.4176	368.114
		89.7773	373.078
		90.137	378.048
		90.4968	382.906
		90.8565	387.531
		91.2163	391.806
		91.576	395.616
		91.9358	398.855
		92.2955	401.429
		92.6552	403.257
		93.015	404.271
		93.3747	404.423
		93.7345	403.682
		94.0942	402.037
		94.454	399.493
		94.8137	396.077
		95.1734	391.831
		95.5332	386.815
		95.8929	381.102
		96.2527	374.777
		96.6124	367.937
		96.9722	360.684
		97.3319	353.128
		97.6916	345.378
		98.0514	337.545
		98.4111	329.737
		98.7709	322.057
		99.1306	314.602
		99.4904	307.458
		99.8501	300.704
		100.21	294.405
		100.57	288.617
		100.929	283.381
		101.289	278.727
		101.649	274.672
		102.009	271.221
		102.368	268.368
		102.728	266.096
		103.088	264.379
		103.448	263.182
		103.807	262.462
		104.167	262.172
		104.527	262.26
		104.887	262.67
		105.246	263.343
		105.606	264.222
		105.966	265.248
		106.325	266.364
		106.685	267.515
		107.045	268.651
		107.405	269.723
		107.764	270.689
		108.124	271.51
		108.484	272.154
		108.844	272.592
		109.203	272.803
		109.563	272.772
		109.923	272.486
		110.283	271.943
		110.642	271.14
		111.002	270.084
		111.362	268.784
		111.722	267.253
		112.081	265.509
		112.441	263.572
		112.801	261.464
		113.161	259.21
		113.52	256.837
		113.88	254.372
		114.24	251.842
		114.6	249.276
		114.959	246.702
		115.319	244.144
		115.679	241.629
		116.039	239.18
		116.398	236.819
		116.758	234.565
		117.118	232.437
		117.478	230.448
		117.837	228.611
		118.197	226.937
		118.557	225.432
		118.916	224.102
		119.276	222.949
		119.636	221.974
		119.996	221.174
		120.355	220.546
		120.715	220.085
		121.075	219.783
		121.435	219.631
		121.794	219.621
		122.154	219.74
		122.514	219.979
		122.874	220.324
		123.233	220.763
		123.593	221.283
		123.953	221.873
		124.313	222.518
		124.672	223.207
		125.032	223.928
		125.392	224.668
		125.752	225.417
		126.111	226.164
		126.471	226.899
		126.831	227.614
		127.191	228.299
		127.55	228.949
		127.91	229.556
		128.27	230.114
		128.63	230.621
		128.989	231.071
		129.349	231.463
		129.709	231.795
		130.069	232.067
		130.428	232.28
		130.788	232.436
		131.148	232.538
		131.507	232.59
		131.867	232.598
		132.227	232.569
		132.587	232.511
		132.946	232.432
		133.306	232.343
		133.666	232.256
		134.026	232.183
		134.385	232.138
		134.745	232.137
		135.105	232.195
		135.465	232.33
		135.824	232.559
		136.184	232.902
		136.544	233.377
		136.904	234.004
		137.263	234.804
		137.623	235.797
		137.983	237.003
		138.343	238.441
		138.702	240.132
		139.062	242.092
		139.422	244.339
		139.782	246.889
		140.141	249.755
		140.501	252.947
		140.861	256.476
		141.221	260.347
		141.58	264.563
		141.94	269.123
		142.3	274.022
		142.66	279.253
		143.019	284.802
		143.379	290.653
		143.739	296.784
		144.099	303.171
		144.458	309.781
		144.818	316.583
		145.178	323.535
		145.537	330.597
		145.897	337.722
		146.257	344.861
		146.617	351.961
		146.976	358.97
		147.336	365.83
		147.696	372.485
		148.056	378.877
		148.415	384.95
		148.775	390.648
		149.135	395.916
		149.495	400.704
		149.854	404.961
		150.214	408.645
		150.574	411.714
		150.934	414.134
		151.293	415.876
		151.653	416.915
		152.013	417.234
		152.373	416.824
		152.732	415.68
		153.092	413.804
		153.452	411.207
		153.812	407.905
		154.171	403.92
		154.531	399.281
		154.891	394.022
		155.251	388.182
		155.61	381.805
		155.97	374.938
		156.33	367.632
		156.69	359.941
		157.049	351.919
		157.409	343.623
		157.769	335.11
		158.128	326.435
		158.488	317.656
		158.848	308.825
		159.208	299.994
		159.567	291.213
		159.927	282.529
		160.287	273.984
		160.647	265.617
		161.006	257.464
		161.366	249.557
		161.726	241.921
		162.086	234.581
		162.445	227.555
		162.805	220.858
		163.165	214.5
		163.525	208.489
		163.884	202.829
		164.244	197.519
		164.604	192.557
		164.964	187.939
		165.323	183.656
		165.683	179.698
		166.043	176.055
		166.403	172.713
		166.762	169.659
		167.122	166.878
		167.482	164.354
		167.842	162.072
		168.201	160.015
		168.561	158.168
		168.921	156.516
		169.281	155.041
		169.64	153.731
		170	152.57
