# Supplementary material for: Homology sensing via non-linear amplification of sequence-dependent pausing by RecQ helicase
Source: eLife. 2019 Aug 29;8:e45909. doi: 10.7554/eLife.45909 (PMC6773442; doi:10.7554/eLife.45909)
Supplement: Figure 3—source data 1. [file elife-45909-fig3-data1.xlsx]

## Sheet: Fig3a
RecQdH1.x	RecQdH1.d	Onebp_melt_step1.x	Onebp_melt_step1.d	Delayed_release_5bp1.x	Delayed_release_5bp1.d	Simul_melt_step_2bp1.x	Simul_melt_step_2bp1.d
0	-0.989666	0	11.6828	0	6.71439	0	-9.51061
0.0166667	1.51034	0.0166667	2.27376	0.0166667	7.00732	0.0166667	-5.6191
0.0333334	2.76035	0.0333333	-3.3331	0.0333333	-4.77035	0.0333333	8.47474
0.0500001	12.7604	0.05	-5.65212	0.05	13.0661	0.05	-4.77991
0.0666668	7.76036	0.0666667	-1.44835	0.0666667	2.60538	0.0666667	1.00369
0.0833335	9.01037	0.0833333	-2.90792	0.0833333	12.7215	0.0833333	-3.15759
0.1	9.01038	0.1	-0.61606	0.1	2.29506	0.1	12.8493
0.116667	5.26038	0.116667	-5.384	0.116667	10.8062	0.116667	-0.252583
0.133334	0.260391	0.133333	4.50195	0.133333	8.48924	0.133333	4.42786
0.15	7.7604	0.15	10.9855	0.15	8.50238	0.15	8.04993
0.166667	-0.989594	0.166667	3.59223	0.166667	8.84494	0.166667	21.2295
0.183334	2.76041	0.183333	9.84327	0.183333	18.4479	0.183333	26.7587
0.2	-0.98958	0.2	7.83474	0.2	10.6105	0.2	12.1267
0.216667	1.51043	0.216667	5.08424	0.216667	2.84175	0.216667	8.1264
0.233334	4.01043	0.233333	12.8686	0.233333	6.49306	0.233333	7.47731
0.250001	7.76044	0.25	18.1596	0.25	10.2289	0.25	13.4358
0.266667	-4.73955	0.266667	17.0442	0.266667	12.7556	0.266667	18.1661
0.283334	0.260456	0.283333	18.7378	0.283333	18.1891	0.283333	19.5728
0.300001	0.260463	0.3	20.1947	0.3	12.3854	0.3	29.9996
0.316667	9.01047	0.316667	16.6377	0.316667	8.49756	0.316667	25.3393
0.333334	1.51048	0.333333	11.2674	0.333333	8.16368	0.333333	20.4192
0.350001	2.76048	0.35	19.7821	0.35	23.4327	0.35	18.1497
0.366667	1.51049	0.366667	28.5708	0.366667	17.39	0.366667	19.9693
0.383334	-8.4895	0.383333	35.8128	0.383333	28.1609	0.383333	23.0239
0.400001	-0.989494	0.4	20.5418	0.4	2.41453	0.4	14.1409
0.416667	-7.23949	0.416667	21.8905	0.416667	15.8521	0.416667	25.0291
0.433334	4.01052	0.433333	27.4653	0.433333	15.9568	0.433333	17.7386
0.450001	-2.23947	0.45	35.4232	0.45	9.34979	0.45	25.2997
0.466668	11.5105	0.466667	16.2657	0.466667	9.61636	0.466667	21.3768
0.483334	16.5105	0.483333	20.5427	0.483333	18.8774	0.483333	18.2959
0.500001	4.01055	0.5	30.8132	0.5	20.1	0.5	29.0418
0.516668	6.51056	0.516667	28.9741	0.516667	15.3979	0.516667	19.4931
0.533334	5.26056	0.533333	24.173	0.533333	24.1267	0.533333	28.3878
0.550001	4.01057	0.55	31.6532	0.55	24.6367	0.55	26.0367
0.566668	7.76058	0.566667	22.1883	0.566667	23.2994	0.566667	33.8047
0.583334	10.2606	0.583333	17.4942	0.583333	20.5582	0.583333	35.9634
0.600001	10.2606	0.6	30.7356	0.6	20.5889	0.6	34.6356
0.616668	15.2606	0.616667	14.6149	0.616667	23.3556	0.616667	27.6692
0.633335	15.2606	0.633333	29.3351	0.633333	25.9492	0.633333	33.6367
0.650001	22.7606	0.65	26.8408	0.65	16.3775	0.65	33.2903
0.666668	24.0106	0.666667	31.4174	0.666667	22.8174	0.666667	31.7325
0.683335	24.0106	0.683333	29.1907	0.683333	20.0592	0.683333	19.9013
0.700001	17.7606	0.7	23.2334	0.7	20.799	0.7	32.1864
0.716668	26.5106	0.716667	28.7126	0.716667	32.3541	0.716667	30.286
0.733335	21.5106	0.733333	18.5355	0.733333	16.5869	0.733333	38.8561
0.750001	22.7607	0.75	29.582	0.75	26.1671	0.75	41.4297
0.766668	25.2607	0.766667	29.2039	0.766667	28.7363	0.766667	48.007
0.783335	27.7607	0.783333	26.8173	0.783333	10.7277	0.783333	47.5189
0.800002	11.5107	0.8	33.5476	0.8	30.9674	0.8	42.2881
0.816668	42.7607	0.816667	38.8612	0.816667	22.8237	0.816667	36.7987
0.833335	26.5107	0.833333	32.8002	0.833333	21.6825	0.833333	31.4408
0.850002	42.7607	0.85	35.02	0.85	22.7616	0.85	41.0009
0.866668	30.2607	0.866667	26.7414	0.866667	16.3443	0.866667	45.2055
0.883335	36.5107	0.883333	40.1308	0.883333	30.2061	0.883333	39.5797
0.900002	24.0107	0.9	43.9477	0.9	20.805	0.9	26.4831
0.916668	40.2607	0.916667	52.586	0.916667	13.0239	0.916667	41.5699
0.933335	31.5107	0.933333	46.7656	0.933333	23.4733	0.933333	28.2124
0.950002	49.0107	0.95	43.5191	0.95	19.4804	0.95	32.5639
0.966669	40.2607	0.966667	49.5026	0.966667	16.2213	0.966667	38.388
0.983335	39.0108	0.983333	45.0662	0.983333	30.5524	0.983333	44.3171
1	44.0108	1	39.6423	1	27.0312	1	43.292
1.01667	35.2608	1.01667	39.1673	1.01667	19.2765	1.01667	39.7428
1.03334	50.2608	1.03333	29.17	1.03333	28.4655	1.03333	45.7457
1.05	49.0108	1.05	37.3197	1.05	20.9186	1.05	44.9898
1.06667	46.5108	1.06667	38.9241	1.06667	18.2934	1.06667	39.6891
1.08334	42.7608	1.08333	53.6088	1.08333	30.5027	1.08333	37.8989
1.1	40.2608	1.1	50.2531	1.1	34.7837	1.1	41.1882
1.11667	44.0108	1.11667	40.4659	1.11667	30.0275	1.11667	44.1025
1.13334	40.2608	1.13333	50.4824	1.13333	36.2115	1.13333	43.4933
1.15	35.2608	1.15	40.1107	1.15	28.0023	1.15	40.7994
1.16667	40.2608	1.16667	44.3148	1.16667	33.1749	1.16667	45.4772
1.18334	41.5108	1.18333	51.3965	1.18333	24.0378	1.18333	47.2278
1.2	49.0108	1.2	42.399	1.2	32.3252	1.2	50.3172
1.21667	50.2609	1.21667	64.9588	1.21667	29.0342	1.21667	38.9909
1.23334	37.7609	1.23333	56.0562	1.23333	42.1626	1.23333	51.1112
1.25	50.2609	1.25	53.3407	1.25	31.4704	1.25	46.5727
1.26667	52.7609	1.26667	52.838	1.26667	26.3408	1.26667	48.5057
1.28334	57.7609	1.28333	46.7557	1.28333	26.6076	1.28333	53.7835
1.3	57.7609	1.3	52.4931	1.3	51.3373	1.3	49.976
1.31667	50.2609	1.31667	56.2567	1.31667	50.0275	1.31667	53.5329
1.33334	50.2609	1.33333	54.7542	1.33333	44.3303	1.33333	58.0422
1.35	56.5109	1.35	61.288	1.35	34.2674	1.35	53.9086
1.36667	45.2609	1.36667	55.8652	1.36667	42.0328	1.36667	54.4491
1.38334	49.0109	1.38333	64.8109	1.38333	40.3972	1.38333	63.9054
1.4	39.0109	1.4	44.5372	1.4	54.6308	1.4	56.6292
1.41667	44.0109	1.41667	43.2195	1.41667	47.4439	1.41667	58.2627
1.43334	51.5109	1.43333	73.2761	1.43333	50.1586	1.43333	59.6168
1.45	50.261	1.45	50.2531	1.45	41.2585	1.45	54.6079
1.46667	39.011	1.46667	60.5881	1.46667	47.1875	1.46667	63.3589
1.48334	49.011	1.48333	54.8959	1.48333	48.4125	1.48333	65.2444
1.5	44.011	1.5	60.536	1.5	51.5852	1.5	61.8705
1.51667	52.761	1.51667	71.9204	1.51667	54.7385	1.51667	59.9353
1.53334	44.011	1.53333	57.8498	1.53333	44.4632	1.53333	63.2166
1.55	47.761	1.55	69.2518	1.55	38.9815	1.55	64.8162
1.56667	44.011	1.56667	57.6562	1.56667	48.2581	1.56667	73.7968
1.58334	45.261	1.58333	64.4876	1.58333	43.7011	1.58333	60.9504
1.6	44.011	1.6	64.4094	1.6	39.9787	1.6	63.1301
1.61667	52.761	1.61667	66.9389	1.61667	50.3723	1.61667	73.4093
1.63334	35.261	1.63333	65.4504	1.63333	56.9233	1.63333	70.2484
1.65	52.761	1.65	75.6445	1.65	44.7939	1.65	63.6281
1.66667	51.5111	1.66667	74.914	1.66667	47.5038	1.66667	81.6613
1.68334	42.7611	1.68333	68.8241	1.68333	55.2645	1.68333	73.789
1.7	42.7611	1.7	77.4007	1.7	52.675	1.7	73.1523
1.71667	42.7611	1.71667	71.0647	1.71667	53.1504	1.71667	73.2836
1.73334	60.2611	1.73333	70.6482	1.73333	62.0176	1.73333	69.2798
1.75	55.2611	1.75	75.2986	1.75	46.7163	1.75	74.3418
1.76667	50.2611	1.76667	70.2003	1.76667	50.5073	1.76667	75.936
1.78334	50.2611	1.78333	75.5685	1.78333	52.5135	1.78333	83.6512
1.8	52.7611	1.8	76.5512	1.8	51.9331	1.8	78.4575
1.81667	49.0111	1.81667	63.7951	1.81667	54.4111	1.81667	75.8542
1.83334	60.2611	1.83333	74.4902	1.83333	55.9248	1.83333	72.3602
1.85	51.5111	1.85	76.8459	1.85	54.9832	1.85	84.7497
1.86667	62.7611	1.86667	76.5742	1.86667	64.6426	1.86667	83.2405
1.88334	70.2611	1.88333	76.6257	1.88333	53.546	1.88333	82.5879
1.9	76.5112	1.9	85.2826	1.9	62.0751	1.9	75.338
1.91667	74.0112	1.91667	69.7081	1.91667	48.362	1.91667	78.5108
1.93334	64.0112	1.93333	70.9986	1.93333	53.7329	1.93333	71.7936
1.95	75.2612	1.95	71.7484	1.95	62.0916	1.95	72.6738
1.96667	69.0112	1.96667	76.1023	1.96667	55.6773	1.96667	69.1162
1.98334	62.7612	1.98333	84.236	1.98333	59.5236	1.98333	73.8022
2	65.2612	2	78.657	2	62.5016	2	78.2913
2.01667	71.5112	2.01667	89.4506	2.01667	64.5936	2.01667	86.4239
2.03334	71.5112	2.03333	83.9787	2.03333	66.9244	2.03333	77.7979
2.05	75.2612	2.05	77.0602	2.05	74.3271	2.05	79.7802
2.06667	75.2612	2.06667	74.2062	2.06667	75.5032	2.06667	84.0878
2.08334	71.5112	2.08333	88.9383	2.08333	63.186	2.08333	79.9724
2.1	72.7612	2.1	82.663	2.1	62.7282	2.1	77.4901
2.11667	79.0112	2.11667	78.2599	2.11667	63.4254	2.11667	85.8061
2.13334	81.5113	2.13333	75.416	2.13333	65.7035	2.13333	92.4561
2.15	89.0113	2.15	92.0993	2.15	74.0252	2.15	77.3568
2.16667	91.5113	2.16667	76.5534	2.16667	76.7661	2.16667	85.5997
2.18334	81.5113	2.18333	85.8864	2.18333	62.9955	2.18333	78.6889
2.2	85.2613	2.2	75.5855	2.2	66.0941	2.2	77.4598
2.21667	82.7613	2.21667	91.6861	2.21667	74.6979	2.21667	74.444
2.23334	81.5113	2.23333	96.9543	2.23333	61.8221	2.23333	90.0928
2.25	90.2613	2.25	88.8303	2.25	66.03	2.25	80.3241
2.26667	85.2613	2.26667	93.3218	2.26667	66.1773	2.26667	88.8793
2.28334	85.2613	2.28333	87.3912	2.28333	71.6207	2.28333	85.7143
2.3	81.5113	2.3	93.7815	2.3	64.7707	2.3	86.2464
2.31667	77.7613	2.31667	83.676	2.31667	72.3064	2.31667	88.4778
2.33334	87.7613	2.33333	92.1812	2.33333	72.9893	2.33333	79.3131
2.35	91.5113	2.35	93.1953	2.35	75.9574	2.35	86.889
2.36667	90.2614	2.36667	100.822	2.36667	76.002	2.36667	92.8487
2.38334	91.5114	2.38333	100.392	2.38333	80.4357	2.38333	88.6234
2.4	94.0114	2.4	84.9482	2.4	90.8287	2.4	82.8323
2.41667	91.5114	2.41667	101.728	2.41667	74.8815	2.41667	93.8741
2.43334	82.7614	2.43333	106.028	2.43333	90.0683	2.43333	95.1057
2.45	87.7614	2.45	89.304	2.45	83.8683	2.45	77.5258
2.46667	94.0114	2.46667	84.2263	2.46667	92.1042	2.46667	84.0858
2.48334	101.511	2.48333	97.0669	2.48333	87.6242	2.48333	83.7987
2.5	91.5114	2.5	95.3139	2.5	76.8539	2.5	81.0426
2.51667	92.7614	2.51667	98.76	2.51667	100.538	2.51667	91.354
2.53334	79.0114	2.53333	91.7859	2.53333	90.589	2.53333	78.411
2.55001	90.2614	2.55	101.672	2.55	91.2377	2.55	84.9994
2.56667	91.5114	2.56667	103.701	2.56667	95.0669	2.56667	85.7686
2.58334	84.0114	2.58333	98.7786	2.58333	90.3647	2.58333	91.9807
2.60001	91.5115	2.6	107.414	2.6	92.492	2.6	94.6626
2.61667	91.5115	2.61667	106.892	2.61667	86.4153	2.61667	87.5652
2.63334	86.5115	2.63333	95.7384	2.63333	85.5946	2.63333	84.0861
2.65001	101.511	2.65	106.463	2.65	79.8003	2.65	95.3928
2.66667	92.7615	2.66667	103.703	2.66667	84.0665	2.66667	88.6261
2.68334	92.7615	2.68333	99.3083	2.68333	89.7721	2.68333	92.8183
2.70001	104.011	2.7	110.944	2.7	97.9478	2.7	89.0233
2.71667	92.7615	2.71667	102.165	2.71667	92.188	2.71667	94.5171
2.73334	85.2615	2.73333	103.221	2.73333	86.4591	2.73333	85.2215
2.75001	91.5115	2.75	110.093	2.75	89.5891	2.75	94.486
2.76667	90.2615	2.76667	110.03	2.76667	80.5412	2.76667	79.5719
2.78334	90.2615	2.78333	109.812	2.78333	94.5511	2.78333	85.0599
2.80001	80.2615	2.8	105.295	2.8	84.6575	2.8	83.2758
2.81667	99.0115	2.81667	108.56	2.81667	95.334	2.81667	79.5032
2.83334	92.7616	2.83333	116.664	2.83333	103.11	2.83333	82.9438
2.85001	97.7616	2.85	103.648	2.85	81.8318	2.85	91.7577
2.86667	95.2616	2.86667	112.82	2.86667	86.6476	2.86667	102.19
2.88334	95.2616	2.88333	117.269	2.88333	96.7462	2.88333	88.3564
2.90001	95.2616	2.9	114.724	2.9	89.6878	2.9	89.0322
2.91667	95.2616	2.91667	115.164	2.91667	83.4572	2.91667	106.791
2.93334	91.5116	2.93333	116.516	2.93333	87.1129	2.93333	95.5227
2.95001	91.5116	2.95	116.611	2.95	93.2569	2.95	89.9334
2.96667	91.5116	2.96667	128.51	2.96667	98.1042	2.96667	91.4974
2.98334	94.0116	2.98333	113.735	2.98333	83.496	2.98333	92.4184
3.00001	99.0116	3	122.327	3	88.2639	3	93.0903
3.01667	90.2616	3.01667	132.925	3.01667	98.9727	3.01667	94.4331
3.03334	90.2616	3.03333	107.035	3.03333	81.6177	3.03333	82.8081
3.05001	95.2616	3.05	132.127	3.05	97.345	3.05	104.686
3.06667	100.262	3.06667	115.638	3.06667	97.1797	3.06667	95.4647
3.08334	91.5117	3.08333	121.262	3.08333	107.314	3.08333	94.1737
3.10001	92.7617	3.1	128.407	3.1	88.034	3.1	95.8903
3.11667	91.5117	3.11667	128.198	3.11667	86.7874	3.11667	99.3963
3.13334	95.2617	3.13333	130.62	3.13333	101.003	3.13333	94.4848
3.15001	109.012	3.15	125.328	3.15	105.607	3.15	93.4141
3.16667	96.5117	3.16667	126.599	3.16667	97.4634	3.16667	104.691
3.18334	112.762	3.18333	133.271	3.18333	95.4033	3.18333	96.9279
3.20001	95.2617	3.2	132.639	3.2	99.9239	3.2	86.6927
3.21667	111.512	3.21667	134.467	3.21667	92.7236	3.21667	95.067
3.23334	114.012	3.23333	132.468	3.23333	107.327	3.23333	92.0936
3.25001	102.762	3.25	138.236	3.25	116.825	3.25	104.01
3.26667	120.262	3.26667	134.445	3.26667	114.097	3.26667	100.075
3.28334	124.012	3.28333	138	3.28333	105.624	3.28333	100.462
3.30001	116.512	3.3	125.84	3.3	101.032	3.3	102.14
3.31667	111.512	3.31667	134.533	3.31667	93.7116	3.31667	103.674
3.33334	126.512	3.33333	135.913	3.33333	111.237	3.33333	93.7448
3.35001	125.262	3.35	144.315	3.35	103.051	3.35	97.0519
3.36667	125.262	3.36667	134.647	3.36667	106.5	3.36667	95.5621
3.38334	119.012	3.38333	128.285	3.38333	118.03	3.38333	91.827
3.40001	124.012	3.4	141.27	3.4	119.642	3.4	109.226
3.41667	126.512	3.41667	139.087	3.41667	113.845	3.41667	99.2654
3.43334	127.762	3.43333	132.386	3.43333	112.383	3.43333	101.399
3.45001	129.012	3.45	125.044	3.45	107.276	3.45	108.307
3.46667	129.012	3.46667	145.693	3.46667	123.922	3.46667	98.3011
3.48334	135.262	3.48333	129.214	3.48333	119.888	3.48333	106.408
3.50001	122.762	3.5	141.574	3.5	122.421	3.5	99.8214
3.51667	124.012	3.51667	129.864	3.51667	119.554	3.51667	102.235
3.53334	117.762	3.53333	149.222	3.53333	126.544	3.53333	112.998
3.55001	125.262	3.55	147.312	3.55	122.752	3.55	105.843
3.56667	126.512	3.56667	146.655	3.56667	136.805	3.56667	113.585
3.58334	121.512	3.58333	143.895	3.58333	129.176	3.58333	112.346
3.60001	129.012	3.6	134.736	3.6	119.104	3.6	111.5
3.61667	122.762	3.61667	153.626	3.61667	137.266	3.61667	114.466
3.63334	131.512	3.63333	149.383	3.63333	119.067	3.63333	119.34
3.65001	130.262	3.65	146.253	3.65	129.334	3.65	118.362
3.66667	129.012	3.66667	161.415	3.66667	145.009	3.66667	118.967
3.68334	135.262	3.68333	156.036	3.68333	130.068	3.68333	117.825
3.70001	140.262	3.7	151.498	3.7	118.989	3.7	117.732
3.71667	142.762	3.71667	144.967	3.71667	127.537	3.71667	122.78
3.73334	146.512	3.73333	158.294	3.73333	143.623	3.73333	116.086
3.75001	156.512	3.75	157.716	3.75	132.21	3.75	132.811
3.76667	129.012	3.76667	144.69	3.76667	125.848	3.76667	136.621
3.78334	146.512	3.78333	163.05	3.78333	129.446	3.78333	118.063
3.80001	141.512	3.8	148.137	3.8	133.542	3.8	130.878
3.81667	137.762	3.81667	161.216	3.81667	146.679	3.81667	123.486
3.83334	146.512	3.83333	152.234	3.83333	138.253	3.83333	127.445
3.85001	144.012	3.85	152.231	3.85	134.46	3.85	120.282
3.86667	152.762	3.86667	163.702	3.86667	134.692	3.86667	136.366
3.88334	147.762	3.88333	146.755	3.88333	144.12	3.88333	124.844
3.90001	161.512	3.9	169.923	3.9	136.42	3.9	129.334
3.91667	170.262	3.91667	165.829	3.91667	140.07	3.91667	126.264
3.93334	167.762	3.93333	173.92	3.93333	142.461	3.93333	118.76
3.95001	157.762	3.95	165.1	3.95	146.291	3.95	126.16
3.96667	164.012	3.96667	163.549	3.96667	148.634	3.96667	122.613
3.98334	161.512	3.98333	177.697	3.98333	152.882	3.98333	134.018
4.00001	159.012	4	169.783	4	146.822	4	138.269
4.01667	161.512	4.01667	162.745	4.01667	154.137	4.01667	128.481
4.03334	170.262	4.03333	169.043	4.03333	140.673	4.03333	130.94
4.05001	159.012	4.05	171.496	4.05	158.733	4.05	127.619
4.06667	156.512	4.06667	179.329	4.06667	148.161	4.06667	133.389
		4.08333	163.127	4.08333	152.058	4.08333	137.629
		4.1	172.279	4.1	147.996	4.1	144.108
		4.11667	176.749	4.11667	154.265	4.11667	146.388
		4.13333	175.842	4.13333	151.707	4.13333	163.768
		4.15	177.367	4.15	152.127	4.15	154.418
		4.16667	177.721	4.16667	159.068	4.16667	148.538
		4.18333	168.016	4.18333	156.15	4.18333	164.057
		4.2	166.507	4.2	167.943	4.2	161.202
		4.21667	192.415	4.21667	156.61	4.21667	151.212
		4.23333	180.732	4.23333	162.627	4.23333	146.792
				4.25	159.762	4.25	162.513
				4.26667	163.992	4.26667	148.845
				4.28333	163.463	4.28333	163.42
				4.3	159.585	4.3	161.233
				4.31667	164.306	4.31667	163.483
				4.33333	173.929	4.33333	172.494
				4.35	168.04	4.35	159.935
				4.36667	155.714	4.36667	157.687
				4.38333	172.553	4.38333	167.485
				4.4	162.61	4.4	171.189
				4.41667	164.243	4.41667	152.2
				4.43333	173.846	4.43333	161.268
				4.45	163.676	4.45	161.035
				4.46667	174.375	4.46667	184.363
				4.48333	166.51	4.48333	165.327
				4.5	171.996	4.5	176.376
				4.51667	180.08	4.51667	179.981
				4.53333	167.95	4.53333	182.874
				4.55	165.826	4.55	171.703
				4.56667	164.788	4.56667	179.187
				4.58333	180.897	4.58333	159.332
				4.6	167.894	4.6	173.945
				4.61667	172.111	4.61667	172.901
				4.63333	170.27	4.63333	167.194
				4.65	171.324	4.65	171.49
				4.66667	171.563	4.66667	174.234
				4.68333	181.674	4.68333	168.999
				4.7	179.201	4.7	166.037

## Sheet: Fig3b and c
Simultaneous_melt_2bp.x	Simultaneous_melt_2bp.d	Onebp_melt_step.x	Onebp_melt_step.d	Delayed_release_5bp.x	Delayed_release_5bp.d	RecQdH_exp.x	RecQdH_exp.d	Stepsize.d	Chi_Delayed_release_avg.d	Chi_Delayed_release_sem.d	Chi_Simultaneous_melt_avg.d	Chi_Simultaneous_melt_sem.d
0	0.174693	0	0.166455	0	0.144731	0	0.266811	1	0.123683	0.0121729	0.144617	0.0099376
5	0.215308	5	0.204059	5	0.191654	5	0.195388	2	0.121804	0.00597865	0.28782	0.00449448
10	0.191815	10	0.201524	10	0.202315	10	0.20923	3	0.126513	0.00802199	0.770382	0.0955663
15	0.247406	15	0.208285	15	0.208145	15	0.226734	4	0.127949	0.0158432
20	0.224389	20	0.192019	20	0.207261	20	0.258603	5	0.10016	0.00602099
25	0.189071	25	0.20016	25	0.219495	25	0.236603	6	0.124819	0.00353604
30	0.171874	30	0.169459	30	0.206732	30	0.213972	7	0.134752	0.00290897
35	0.182862	35	0.178485	35	0.168602	35	0.195328	8	0.139016	0.0078905
40	0.204272	40	0.186586	40	0.200986	40	0.213841	9	0.184051	0.0142252
45	0.192979	45	0.190426	45	0.177986	45	0.21419	10	0.135549	0.00807334
50	0.181444	50	0.195329	50	0.181081	50	0.213032
55	0.165098	55	0.16575	55	0.174404	55	0.190831
60	0.166983	60	0.174285	60	0.17144	60	0.189743
65	0.179808	65	0.191661	65	0.175624	65	0.207652
70	0.188066	70	0.180943	70	0.185338	70	0.202901
75	0.239952	75	0.18918	75	0.210861	75	0.226965
80	0.332966	80	0.241005	80	0.224123	80	0.270937
85	0.317792	85	0.240599	85	0.256478	85	0.291474
90	0.261798	90	0.223265	90	0.237144	90	0.26253
95	0.272645	95	0.211753	95	0.236236	95	0.257804
100	0.210054	100	0.210774	100	0.219201	100	0.236054
105	0.156861	105	0.170673	105	0.186165	105	0.198307
110	0.145219	110	0.154852	110	0.165432	110	0.18173
115	0.157219	115	0.160245	115	0.147503	115	0.178243
120	0.186629	120	0.197262	120	0.198276	120	0.200613
125	0.227489	125	0.224007	125	0.217817	125	0.14418
130	0.224603	130	0.192917	130	0.21309	130	0.199185
135	0.168749	135	0.162998	135	0.187688	135	0.163585
140	0.130992	140	0.161567	140	0.161249	140	0.199116
145	0.134683	145	0.154611	145	0.159537	145	0.285529
150	0.154694	150	0.158248	150	0.134208	150	0.292177
155	0.179224	155	0.171383	155	0.160612	155	0.199339
160	0.191191	160	0.177038	160	0.169336	160	0.142236
165	0.217262	165	0.224096	165	0.231818

## Sheet: Fig3-figsupp1
RecQdH.x	RecQdH.d	Onebp_melt_step.x	Onebp_melt_step.d	Delayed_release_2bp.x	Delayed_release_2bp.d	Delayed_release_3bp.x	Delayed_release_3bp.d	Delayed_release_4bp.x	Delayed_release_4bp.d	Delayed_release_5bp.x	Delayed_release_5bp.d	Delayed_release_7bp.x	Delayed_release_7bp.d	Deleayed_release_6bp.x	Deleayed_release_6bp.d	Simul_melt_step_2bp.x	Simul_melt_step_2bp.d	Simul_melt_step_3bp.x	Simul_melt_step_3bp.d	Simul_melt_step_4bp.x	Simul_melt_step_4bp.d
0	7.83454	0	-0.653665	0	-0.653665	0	-0.653665	0	-0.653665	0	-0.653665	0	-0.653665	0	-0.653665	0	14.8861	0	6.52651	0	-1.07478
0.016667	-2.16545	0.016667	-0.132424	0.016667	-0.132424	0.016667	-0.132424	0.016667	-0.132424	0.016667	-0.132424	0.016667	-0.132424	0.016667	-0.132424	0.016667	-0.0888312	0.016667	3.24453	0.016667	11.068
0.033334	-0.915441	0.033334	4.5337	0.033334	4.5337	0.033334	4.5337	0.033334	4.5337	0.033334	4.5337	0.033334	4.5337	0.033334	4.5337	0.033334	10.0603	0.033334	11.2239	0.033334	18.9055
0.050001	4.08457	0.050001	-7.41218	0.050001	-7.41218	0.050001	-7.41218	0.050001	-7.41218	0.050001	-7.41218	0.050001	-7.41218	0.050001	-7.41218	0.050001	4.62967	0.050001	10.4195	0.050001	15.712
0.066668	1.58457	0.066668	12.4888	0.066668	12.4888	0.066668	12.4888	0.066668	12.4888	0.066668	12.4888	0.066668	12.4888	0.066668	12.4888	0.066668	5.9566	0.066668	3.282	0.066668	3.83309
0.083335	2.83458	0.083335	7.17422	0.083335	7.17422	0.083335	7.17422	0.083335	7.17422	0.083335	7.17422	0.083335	7.17422	0.083335	7.17422	0.083335	14.0737	0.083335	12.4979	0.083335	9.72895
0.100002	5.33459	0.100002	6.66608	0.100002	6.66608	0.100002	6.66608	0.100002	6.66608	0.100002	6.66608	0.100002	6.66608	0.100002	6.66608	0.100002	7.94119	0.100002	2.53498	0.100002	9.35793
0.116669	-8.41541	0.116669	13.145	0.116669	13.145	0.116669	13.145	0.116669	13.145	0.116669	13.145	0.116669	13.145	0.116669	13.145	0.116669	9.47611	0.116669	3.04381	0.116669	6.46586
0.133336	0.334601	0.133336	9.90502	0.133336	9.90502	0.133336	9.90502	0.133336	9.90502	0.133336	9.90502	0.133336	9.90502	0.133336	9.90502	0.133336	13.3147	0.133336	9.71967	0.133336	12.505
0.150003	1.58461	0.150003	14.0502	0.150003	14.0502	0.150003	14.0502	0.150003	14.0502	0.150003	14.0502	0.150003	14.0502	0.150003	14.0502	0.150003	13.0745	0.150003	8.93684	0.150003	12.8722
0.16667	7.83462	0.16667	6.05343	0.16667	6.05343	0.16667	6.05343	0.16667	6.05343	0.16667	6.05343	0.16667	6.05343	0.16667	6.05343	0.16667	4.47108	0.16667	4.49056	0.16667	24.2767
0.183337	2.83462	0.183337	3.08891	0.183337	3.08891	0.183337	3.08891	0.183337	3.08891	0.183337	3.08891	0.183337	3.08891	0.183337	3.08891	0.183337	12.5868	0.183337	16.0135	0.183337	20.4644
0.200004	4.08463	0.200004	8.58868	0.200004	8.58868	0.200004	8.58868	0.200004	8.58868	0.200004	8.58868	0.200004	8.58868	0.200004	8.58868	0.200004	17.5914	0.200004	9.67064	0.200004	26.6326
0.216671	4.08464	0.216671	14.1063	0.216671	14.1063	0.216671	14.1063	0.216671	14.1063	0.216671	14.1063	0.216671	14.1063	0.216671	14.1063	0.216671	13.7475	0.216671	6.02899	0.216671	29.2307
0.233338	0.334644	0.233338	15.2303	0.233338	15.2303	0.233338	15.2303	0.233338	15.2303	0.233338	15.2303	0.233338	15.2303	0.233338	15.2303	0.233338	13.7636	0.233338	10.4308	0.233338	21.2611
0.250005	-5.91535	0.250005	7.4635	0.250005	7.4635	0.250005	7.4635	0.250005	7.4635	0.250005	7.4635	0.250005	7.4635	0.250005	7.4635	0.250005	17.6489	0.250005	19.6848	0.250005	24.7565
0.266672	-4.66534	0.266672	13.153	0.266672	13.153	0.266672	13.153	0.266672	13.153	0.266672	13.153	0.266672	13.153	0.266672	13.153	0.266672	23.355	0.266672	8.14174	0.266672	16.5293
0.283339	1.58467	0.283339	7.1634	0.283339	7.1634	0.283339	7.1634	0.283339	7.1634	0.283339	7.1634	0.283339	7.1634	0.283339	7.1634	0.283339	18.2249	0.283339	19.7602	0.283339	19.2892
0.300006	2.83467	0.300006	15.625	0.300006	15.625	0.300006	15.625	0.300006	15.625	0.300006	15.625	0.300006	15.625	0.300006	15.625	0.300006	18.0204	0.300006	15.1035	0.300006	11.1397
0.316673	1.58468	0.316673	11.5035	0.316673	11.5035	0.316673	11.5035	0.316673	11.5035	0.316673	11.5035	0.316673	11.5035	0.316673	11.5035	0.316673	29.4972	0.316673	15.8073	0.316673	33.2299
0.33334	0.334687	0.33334	21.0717	0.33334	21.0717	0.33334	21.0717	0.33334	21.0717	0.33334	21.0717	0.33334	21.0717	0.33334	21.0717	0.33334	23.605	0.33334	17.7209	0.33334	21.9721
0.350007	7.83469	0.350007	4.60915	0.350007	4.60915	0.350007	4.60915	0.350007	4.60915	0.350007	4.60915	0.350007	4.60915	0.350007	4.60915	0.350007	22.9243	0.350007	16.2463	0.350007	26.9054
0.366674	4.0847	0.366674	7.74322	0.366674	7.74322	0.366674	7.74322	0.366674	7.74322	0.366674	7.74322	0.366674	7.74322	0.366674	7.74322	0.366674	33.8013	0.366674	24.327	0.366674	23.328
0.383341	1.58471	0.383341	15.6453	0.383341	15.6453	0.383341	15.6453	0.383341	15.6453	0.383341	15.6453	0.383341	15.6453	0.383341	15.6453	0.383341	31.6713	0.383341	10.1664	0.383341	19.67
0.400008	4.08472	0.400008	5.36614	0.400008	5.36614	0.400008	5.36614	0.400008	5.36614	0.400008	5.36614	0.400008	5.36614	0.400008	5.36614	0.400008	25.1312	0.400008	22.4701	0.400008	15.7539
0.416675	7.83472	0.416675	11.5439	0.416675	11.5439	0.416675	11.5439	0.416675	11.5439	0.416675	11.5439	0.416675	11.5439	0.416675	11.5439	0.416675	24.9848	0.416675	26.6675	0.416675	13.3261
0.433342	15.3347	0.433342	11.602	0.433342	11.602	0.433342	11.602	0.433342	11.602	0.433342	11.602	0.433342	11.602	0.433342	11.602	0.433342	39.3386	0.433342	22.0522	0.433342	27.38
0.450009	-0.915262	0.450009	20.1105	0.450009	20.1105	0.450009	20.1105	0.450009	20.1105	0.450009	20.1105	0.450009	20.1105	0.450009	20.1105	0.450009	36.7736	0.450009	29.8982	0.450009	24.3026
0.466676	11.5847	0.466676	16.2658	0.466676	16.2658	0.466676	16.2658	0.466676	16.2658	0.466676	16.2658	0.466676	16.2658	0.466676	16.2658	0.466676	35.2111	0.466676	18.8499	0.466676	34.9214
0.483343	6.58475	0.483343	22.4815	0.483343	22.4815	0.483343	22.4815	0.483343	22.4815	0.483343	22.4815	0.483343	22.4815	0.483343	22.4815	0.483343	38.1159	0.483343	24.2546	0.483343	18.0714
0.50001	12.8348	0.50001	18.8371	0.50001	18.8371	0.50001	18.8371	0.50001	18.8371	0.50001	18.8371	0.50001	18.8371	0.50001	18.8371	0.50001	38.0148	0.50001	31.4605	0.50001	29.1364
0.516677	9.08477	0.516677	16.4743	0.516677	16.4743	0.516677	16.4743	0.516677	16.4743	0.516677	16.4743	0.516677	16.4743	0.516677	16.4743	0.516677	31.2103	0.516677	36.2872	0.516677	27.0914
0.533344	4.08477	0.533344	14.6885	0.533344	14.6885	0.533344	14.6885	0.533344	14.6885	0.533344	14.6885	0.533344	14.6885	0.533344	14.6885	0.533344	37.1059	0.533344	36.3945	0.533344	35.3086
0.550011	-3.41522	0.550011	23.0594	0.550011	23.0594	0.550011	23.0594	0.550011	23.0594	0.550011	23.0594	0.550011	23.0594	0.550011	23.0594	0.550011	38.9508	0.550011	25.5766	0.550011	34.8612
0.566678	-0.915212	0.566678	18.4369	0.566678	18.4369	0.566678	18.4369	0.566678	18.4369	0.566678	18.4369	0.566678	18.4369	0.566678	18.4369	0.566678	36.6767	0.566678	30.2181	0.566678	34.1578
0.583345	5.33479	0.583345	21.1698	0.583345	21.1698	0.583345	21.1698	0.583345	21.1698	0.583345	21.1698	0.583345	21.1698	0.583345	21.1698	0.583345	42.8727	0.583345	33.3664	0.583345	31.5394
0.600012	2.8348	0.600012	21.2638	0.600012	21.2638	0.600012	21.2638	0.600012	21.2638	0.600012	21.2638	0.600012	21.2638	0.600012	21.2638	0.600012	44.0927	0.600012	28.0296	0.600012	34.6895
0.616679	6.58481	0.616679	21.8005	0.616679	21.8005	0.616679	21.8005	0.616679	21.8005	0.616679	21.8005	0.616679	21.8005	0.616679	21.8005	0.616679	41.0213	0.616679	24.8846	0.616679	32.0343
0.633346	-2.16518	0.633346	20.1777	0.633346	20.1777	0.633346	20.1777	0.633346	20.1777	0.633346	20.1777	0.633346	20.1777	0.633346	20.1777	0.633346	38.8443	0.633346	31.7738	0.633346	41.4226
0.650013	11.5848	0.650013	29.6237	0.650013	29.6237	0.650013	29.6237	0.650013	29.6237	0.650013	29.6237	0.650013	29.6237	0.650013	29.6237	0.650013	43.4894	0.650013	42.2802	0.650013	45.9707
0.66668	9.08483	0.66668	16.1287	0.66668	16.1287	0.66668	16.1287	0.66668	16.1287	0.66668	16.1287	0.66668	16.1287	0.66668	16.1287	0.66668	42.0427	0.66668	32.7089	0.66668	41.6753
0.683347	15.3348	0.683347	14.5463	0.683347	14.5463	0.683347	14.5463	0.683347	14.5463	0.683347	14.5463	0.683347	14.5463	0.683347	14.5463	0.683347	40.5324	0.683347	41.9583	0.683347	42.084
0.700014	-0.915155	0.700014	31.443	0.700014	31.443	0.700014	31.443	0.700014	31.443	0.700014	31.443	0.700014	31.443	0.700014	31.443	0.700014	33.6314	0.700014	33.8635	0.700014	36.0244
0.716681	-5.91515	0.716681	29.8793	0.716681	29.8793	0.716681	29.8793	0.716681	29.8793	0.716681	29.8793	0.716681	29.8793	0.716681	29.8793	0.716681	45.2139	0.716681	28.8647	0.716681	39.1385
0.733348	12.8349	0.733348	14.9993	0.733348	14.9993	0.733348	14.9993	0.733348	14.9993	0.733348	14.9993	0.733348	14.9993	0.733348	14.9993	0.733348	46.1272	0.733348	40.2417	0.733348	32.9772
0.750015	20.3349	0.750015	31.2764	0.750015	31.2764	0.750015	31.2764	0.750015	31.2764	0.750015	31.2764	0.750015	31.2764	0.750015	31.2764	0.750015	42.0639	0.750015	46.5922	0.750015	37.2185
0.766682	5.33487	0.766682	25.3512	0.766682	25.3512	0.766682	25.3512	0.766682	25.3512	0.766682	25.3512	0.766682	25.3512	0.766682	25.3512	0.766682	34.1001	0.766682	45.3619	0.766682	32.2738
0.783349	7.83488	0.783349	29.9685	0.783349	29.9685	0.783349	29.9685	0.783349	29.9685	0.783349	29.9685	0.783349	29.9685	0.783349	29.9685	0.783349	44.5774	0.783349	35.566	0.783349	50.1575
0.800016	7.83489	0.800016	32.3578	0.800016	32.3578	0.800016	32.3578	0.800016	32.3578	0.800016	32.3578	0.800016	32.3578	0.800016	32.3578	0.800016	42.1447	0.800016	36.1625	0.800016	49.8196
0.816683	9.0849	0.816683	42.4356	0.816683	42.4356	0.816683	42.4356	0.816683	42.4356	0.816683	42.4356	0.816683	42.4356	0.816683	42.4356	0.816683	49.8016	0.816683	47.7869	0.816683	45.5142
0.83335	17.8349	0.83335	31.9172	0.83335	31.9172	0.83335	31.9172	0.83335	31.9172	0.83335	31.9172	0.83335	31.9172	0.83335	31.9172	0.83335	53.8963	0.83335	26.3171	0.83335	50.9512
0.850017	12.8349	0.850017	33.6004	0.850017	33.6004	0.850017	33.6004	0.850017	33.6004	0.850017	33.6004	0.850017	33.6004	0.850017	33.6004	0.850017	58.3559	0.850017	36.0985	0.850017	42.8838
0.866684	9.08492	0.866684	24.8431	0.866684	24.8431	0.866684	24.8431	0.866684	24.8431	0.866684	24.8431	0.866684	24.8431	0.866684	24.8431	0.866684	54.0241	0.866684	38.0207	0.866684	45.9637
0.883351	16.5849	0.883351	32.9665	0.883351	32.9665	0.883351	32.9665	0.883351	32.9665	0.883351	32.9665	0.883351	32.9665	0.883351	32.9665	0.883351	52.4111	0.883351	33.2783	0.883351	48.8456
0.900018	16.5849	0.900018	28.4503	0.900018	28.4503	0.900018	28.4503	0.900018	28.4503	0.900018	28.4503	0.900018	28.4503	0.900018	28.4503	0.900018	68.3924	0.900018	36.7299	0.900018	54.3808
0.916685	25.3349	0.916685	43.6245	0.916685	43.6245	0.916685	43.6245	0.916685	43.6245	0.916685	43.6245	0.916685	43.6245	0.916685	43.6245	0.916685	59.2473	0.916685	42.8158	0.916685	49.0554
0.933352	21.5849	0.933352	41.9916	0.933352	41.9916	0.933352	41.9916	0.933352	41.9916	0.933352	41.9916	0.933352	41.9916	0.933352	41.9916	0.933352	50.318	0.933352	41.2648	0.933352	52.5651
0.950019	34.085	0.950019	33.6481	0.950019	33.6481	0.950019	33.6481	0.950019	33.6481	0.950019	33.6481	0.950019	33.6481	0.950019	33.6481	0.950019	55.072	0.950019	36.0783	0.950019	53.672
0.966686	27.835	0.966686	42.4067	0.966686	42.4067	0.966686	42.4067	0.966686	42.4067	0.966686	42.4067	0.966686	42.4067	0.966686	42.4067	0.966686	65.8338	0.966686	38.7185	0.966686	59.2282
0.983353	21.585	0.983353	42.6469	0.983353	42.6469	0.983353	42.6469	0.983353	42.6469	0.983353	42.6469	0.983353	42.6469	0.983353	42.6469	0.983353	58.3911	0.983353	38.2803	0.983353	63.3842
1.00002	36.585	1.00002	39.3159	1.00002	39.3159	1.00002	39.3159	1.00002	39.3159	1.00002	39.3159	1.00002	39.3159	1.00002	39.3159	1.00002	57.4981	1.00002	45.3139	1.00002	64.2802
1.01669	30.335	1.01669	50.4863	1.01669	50.4863	1.01669	50.4863	1.01669	50.4863	1.01669	50.4863	1.01669	50.4863	1.01669	50.4863	1.01669	61.129	1.01669	46.2931	1.01669	67.9453
1.03335	30.335	1.03335	40.367	1.03335	40.367	1.03335	40.367	1.03335	40.367	1.03335	40.367	1.03335	40.367	1.03335	40.367	1.03335	62.1047	1.03335	48.197	1.03335	60.2437
1.05002	26.585	1.05002	46.3521	1.05002	46.3521	1.05002	46.3521	1.05002	46.3521	1.05002	46.3521	1.05002	46.3521	1.05002	46.3521	1.05002	62.9407	1.05002	53.198	1.05002	64.5459
1.06669	25.335	1.06669	41.1438	1.06669	41.1438	1.06669	41.1438	1.06669	41.1438	1.06669	41.1438	1.06669	41.1438	1.06669	41.1438	1.06669	55.5088	1.06669	54.0358	1.06669	55.7245
1.08336	30.335	1.08336	46.6249	1.08336	46.6249	1.08336	46.6249	1.08336	46.6249	1.08336	46.6249	1.08336	46.6249	1.08336	46.6249	1.08336	66.8835	1.08336	54.1186	1.08336	64.3978
1.10002	29.085	1.10002	41.2211	1.10002	41.2211	1.10002	41.2211	1.10002	41.2211	1.10002	41.2211	1.10002	41.2211	1.10002	41.2211	1.10002	59.9423	1.10002	46.4225	1.10002	61.0884
1.11669	24.085	1.11669	45.009	1.11669	45.009	1.11669	45.009	1.11669	45.009	1.11669	45.009	1.11669	45.009	1.11669	45.009	1.11669	67.2728	1.11669	61.2017	1.11669	71.0046
1.13336	24.085	1.13336	45.786	1.13336	45.786	1.13336	45.786	1.13336	45.786	1.13336	45.786	1.13336	45.786	1.13336	45.786	1.13336	65.0031	1.13336	55.2767	1.13336	63.2455
1.15002	17.835	1.15002	46.7683	1.15002	46.7683	1.15002	46.7683	1.15002	46.7683	1.15002	46.7683	1.15002	46.7683	1.15002	46.7683	1.15002	61.4387	1.15002	52.7293	1.15002	67.8492
1.16669	19.085	1.16669	44.1071	1.16669	44.1071	1.16669	44.1071	1.16669	44.1071	1.16669	44.1071	1.16669	44.1071	1.16669	44.1071	1.16669	63.8813	1.16669	64.9046	1.16669	59.8564
1.18336	11.5851	1.18336	43.8417	1.18336	43.8417	1.18336	43.8417	1.18336	43.8417	1.18336	43.8417	1.18336	43.8417	1.18336	43.8417	1.18336	67.8604	1.18336	69.1329	1.18336	63.0889
1.20002	12.8351	1.20002	55.9149	1.20002	55.9149	1.20002	55.9149	1.20002	55.9149	1.20002	55.9149	1.20002	55.9149	1.20002	55.9149	1.20002	74.3504	1.20002	55.7138	1.20002	66.9141
1.21669	20.3351	1.21669	41.9062	1.21669	41.9062	1.21669	41.9062	1.21669	41.9062	1.21669	41.9062	1.21669	41.9062	1.21669	41.9062	1.21669	69.2636	1.21669	62.1575	1.21669	67.5219
1.23336	16.5851	1.23336	51.2861	1.23336	51.2861	1.23336	51.2861	1.23336	51.2861	1.23336	51.2861	1.23336	51.2861	1.23336	51.2861	1.23336	72.9216	1.23336	63.0985	1.23336	65.6834
1.25003	11.5851	1.25003	53.9504	1.25003	53.9504	1.25003	53.9504	1.25003	53.9504	1.25003	53.9504	1.25003	53.9504	1.25003	53.9504	1.25003	72.6379	1.25003	61.2802	1.25003	62.4658
1.26669	17.8351	1.26669	61.9623	1.26669	61.9623	1.26669	61.9623	1.26669	61.9623	1.26669	61.9623	1.26669	61.9623	1.26669	61.9623	1.26669	69.4756	1.26669	69.9597	1.26669	66.5735
1.28336	24.0851	1.28336	46.2002	1.28336	46.2002	1.28336	46.2002	1.28336	46.2002	1.28336	46.2002	1.28336	46.2002	1.28336	46.2002	1.28336	68.7781	1.28336	68.7811	1.28336	64.6004
1.30003	25.3351	1.30003	56.9959	1.30003	56.9959	1.30003	56.9959	1.30003	56.9959	1.30003	56.9959	1.30003	56.9959	1.30003	56.9959	1.30003	72.5784	1.30003	68.9181	1.30003	73.7367
1.31669	24.0851	1.31669	43.5769	1.31669	43.5769	1.31669	43.5769	1.31669	43.5769	1.31669	43.5769	1.31669	43.5769	1.31669	43.5769	1.31669	62.3863	1.31669	68.1749	1.31669	78.3133
1.33336	24.0851	1.33336	63.6758	1.33336	63.6758	1.33336	63.6758	1.33336	63.6758	1.33336	63.6758	1.33336	63.6758	1.33336	63.6758	1.33336	71.2521	1.33336	72.6148	1.33336	77.4011
1.35003	22.8351	1.35003	52.3222	1.35003	52.3222	1.35003	52.3222	1.35003	52.3222	1.35003	52.3222	1.35003	52.3222	1.35003	52.3222	1.35003	71.3472	1.35003	76.084	1.35003	75.6087
1.36669	21.5851	1.36669	58.7021	1.36669	58.7021	1.36669	58.7021	1.36669	58.7021	1.36669	58.7021	1.36669	58.7021	1.36669	58.7021	1.36669	73.401	1.36669	71.5698	1.36669	76.2963
1.38336	24.0851	1.38336	57.3072	1.38336	57.3072	1.38336	57.3072	1.38336	57.3072	1.38336	57.3072	1.38336	57.3072	1.38336	57.3072	1.38336	66.2308	1.38336	76.9172	1.38336	81.0273
1.40003	16.5851	1.40003	61.1078	1.40003	61.1078	1.40003	61.1078	1.40003	61.1078	1.40003	61.1078	1.40003	61.1078	1.40003	61.1078	1.40003	68.4324	1.40003	82.2651	1.40003	81.1934
1.4167	21.5852	1.4167	59.5431	1.4167	59.5431	1.4167	59.5431	1.4167	59.5431	1.4167	59.5431	1.4167	59.5431	1.4167	59.5431	1.4167	66.5483	1.4167	67.9207	1.4167	75.9276
1.43336	11.5852	1.43336	56.5375	1.43336	56.5375	1.43336	56.5375	1.43336	56.5375	1.43336	56.5375	1.43336	56.5375	1.43336	56.5375	1.43336	65.104	1.43336	78.1743	1.43336	85.3089
1.45003	24.0852	1.45003	58.4676	1.45003	58.4676	1.45003	58.4676	1.45003	58.4676	1.45003	58.4676	1.45003	58.4676	1.45003	58.4676	1.45003	77.3511	1.45003	85.5616	1.45003	86.9434
1.4667	32.8352	1.4667	63.4677	1.4667	63.4677	1.4667	63.4677	1.4667	63.4677	1.4667	63.4677	1.4667	63.4677	1.4667	63.4677	1.4667	76.7234	1.4667	81.4864	1.4667	78.3842
1.48336	40.3352	1.48336	58.4707	1.48336	58.4707	1.48336	58.4707	1.48336	58.4707	1.48336	58.4707	1.48336	58.4707	1.48336	58.4707	1.48336	64.822	1.48336	77.8062	1.48336	82.372
1.50003	40.3352	1.50003	56.9775	1.50003	56.9775	1.50003	56.9775	1.50003	56.9775	1.50003	56.9775	1.50003	56.9775	1.50003	56.9775	1.50003	72.3805	1.50003	79.8804	1.50003	82.2816
1.5167	49.0852	1.5167	71.5814	1.5167	71.5814	1.5167	71.5814	1.5167	71.5814	1.5167	71.5814	1.5167	71.5814	1.5167	71.5814	1.5167	74.8428	1.5167	85.7407	1.5167	91.5609
1.53336	41.5852	1.53336	72.7867	1.53336	72.7867	1.53336	72.7867	1.53336	72.7867	1.53336	72.7867	1.53336	72.7867	1.53336	72.7867	1.53336	69.7405	1.53336	82.5674	1.53336	92.8749
1.55003	32.8352	1.55003	61.68	1.55003	61.68	1.55003	61.68	1.55003	61.68	1.55003	61.68	1.55003	61.68	1.55003	61.68	1.55003	73.8644	1.55003	83.8754	1.55003	78.2949
1.5667	45.3352	1.5667	72.5412	1.5667	72.5412	1.5667	72.5412	1.5667	72.5412	1.5667	72.5412	1.5667	72.5412	1.5667	72.5412	1.5667	74.559	1.5667	76.5455	1.5667	75.8842
1.58337	36.5852	1.58337	68.8145	1.58337	68.8145	1.58337	68.8145	1.58337	68.8145	1.58337	68.8145	1.58337	68.8145	1.58337	68.8145	1.58337	74.2058	1.58337	90.1739	1.58337	86.5562
1.60003	36.5852	1.60003	72.5323	1.60003	72.5323	1.60003	72.5323	1.60003	72.5323	1.60003	72.5323	1.60003	72.5323	1.60003	72.5323	1.60003	68.8241	1.60003	84.2802	1.60003	85.6247
1.6167	39.0852	1.6167	67.3362	1.6167	67.3362	1.6167	67.3362	1.6167	67.3362	1.6167	67.3362	1.6167	67.3362	1.6167	67.3362	1.6167	86.7307	1.6167	80.8214	1.6167	90.8819
1.63337	35.3352	1.63337	71.5996	1.63337	71.5996	1.63337	71.5996	1.63337	71.5996	1.63337	71.5996	1.63337	71.5996	1.63337	71.5996	1.63337	82.5148	1.63337	80.8632	1.63337	81.4607
1.65003	37.8353	1.65003	63.5861	1.65003	63.5861	1.65003	63.5861	1.65003	63.5861	1.65003	63.5861	1.65003	63.5861	1.65003	63.5861	1.65003	80.4278	1.65003	78.1862	1.65003	83.1655
1.6667	42.8353	1.6667	83.2117	1.6667	83.2117	1.6667	83.2117	1.6667	83.2117	1.6667	83.2117	1.6667	83.2117	1.6667	83.2117	1.6667	80.4287	1.6667	81.5255	1.6667	90.0388
1.68337	42.8353	1.68337	62.3298	1.68337	62.3298	1.68337	62.3298	1.68337	62.3298	1.68337	62.3298	1.68337	62.3298	1.68337	62.3298	1.68337	79.793	1.68337	84.2139	1.68337	81.4685
1.70003	51.5853	1.70003	69.995	1.70003	69.995	1.70003	69.995	1.70003	69.995	1.70003	69.995	1.70003	69.995	1.70003	69.995	1.70003	87.1841	1.70003	75.754	1.70003	82.7937
1.7167	37.8353	1.7167	72.7141	1.7167	72.7141	1.7167	72.7141	1.7167	72.7141	1.7167	72.7141	1.7167	72.7141	1.7167	72.7141	1.7167	88.1782	1.7167	84.6161	1.7167	79.9439
1.73337	55.3353	1.73337	70.8062	1.73337	70.8062	1.73337	70.8062	1.73337	70.8062	1.73337	70.8062	1.73337	70.8062	1.73337	70.8062	1.73337	78.0404	1.73337	95.3997	1.73337	78.4815
1.75004	57.8353	1.75004	84.7092	1.75004	84.7092	1.75004	84.7092	1.75004	84.7092	1.75004	84.7092	1.75004	84.7092	1.75004	84.7092	1.75004	82.2901	1.75004	94.943	1.75004	80.0607
1.7667	54.0853	1.7667	72.5168	1.7667	72.5168	1.7667	72.5168	1.7667	72.5168	1.7667	72.5168	1.7667	72.5168	1.7667	72.5168	1.7667	88.5759	1.7667	76.5012	1.7667	88.1476
1.78337	50.3353	1.78337	77.2437	1.78337	77.2437	1.78337	77.2437	1.78337	77.2437	1.78337	77.2437	1.78337	77.2437	1.78337	77.2437	1.78337	87.7417	1.78337	85.2208	1.78337	92.3726
1.80004	39.0853	1.80004	79.0393	1.80004	79.0393	1.80004	79.0393	1.80004	79.0393	1.80004	79.0393	1.80004	79.0393	1.80004	79.0393	1.80004	87.4133	1.80004	73.1929	1.80004	96.2742
1.8167	39.0853	1.8167	79.7526	1.8167	79.7526	1.8167	79.7526	1.8167	79.7526	1.8167	79.7526	1.8167	79.7526	1.8167	79.7526	1.8167	84.6672	1.8167	84.4634	1.8167	78.523
1.83337	49.0853	1.83337	78.2126	1.83337	78.2126	1.83337	78.2126	1.83337	78.2126	1.83337	78.2126	1.83337	78.2126	1.83337	78.2126	1.83337	82.2197	1.83337	90.5358	1.83337	94.2374
1.85004	49.0853	1.85004	71.3798	1.85004	71.3798	1.85004	71.3798	1.85004	71.3798	1.85004	71.3798	1.85004	71.3798	1.85004	71.3798	1.85004	83.2106	1.85004	83.3374	1.85004	87.1226
1.8667	52.8353	1.8667	86.731	1.8667	86.731	1.8667	86.731	1.8667	86.731	1.8667	86.731	1.8667	86.731	1.8667	86.731	1.8667	88.4853	1.8667	83.0333	1.8667	95.3899
1.88337	45.3354	1.88337	78.6396	1.88337	78.6396	1.88337	78.6396	1.88337	78.6396	1.88337	78.6396	1.88337	78.6396	1.88337	78.6396	1.88337	80.0999	1.88337	90.498	1.88337	94.4333
1.90004	55.3354	1.90004	70.5281	1.90004	70.5281	1.90004	70.5281	1.90004	70.5281	1.90004	70.5281	1.90004	70.5281	1.90004	70.5281	1.90004	84.1249	1.90004	83.4731	1.90004	100.825
1.91671	45.3354	1.91671	78.6469	1.91671	78.6469	1.91671	78.6469	1.91671	78.6469	1.91671	78.6469	1.91671	78.6469	1.91671	78.6469	1.91671	77.1129	1.91671	93.2406	1.91671	93.4376
1.93337	51.5854	1.93337	85.7337	1.93337	85.7337	1.93337	85.7337	1.93337	85.7337	1.93337	85.7337	1.93337	85.7337	1.93337	85.7337	1.93337	87.3494	1.93337	93.0139	1.93337	87.052
1.95004	56.5854	1.95004	83.3832	1.95004	83.3832	1.95004	83.3832	1.95004	83.3832	1.95004	83.3832	1.95004	83.3832	1.95004	83.3832	1.95004	85.4868	1.95004	90.0476	1.95004	94.3654
1.96671	47.8354	1.96671	92.8697	1.96671	92.8697	1.96671	92.8697	1.96671	92.8697	1.96671	92.8697	1.96671	92.8697	1.96671	92.8697	1.96671	76.784	1.96671	90.0788	1.96671	95.3932
1.98337	51.5854	1.98337	88.2403	1.98337	88.2403	1.98337	88.2403	1.98337	88.2403	1.98337	88.2403	1.98337	88.2403	1.98337	88.2403	1.98337	82.8765	1.98337	94.8805	1.98337	98.3415
2.00004	47.8354	2.00004	87.0326	2.00004	87.0326	2.00004	87.0326	2.00004	87.0326	2.00004	87.0326	2.00004	87.0326	2.00004	87.0326	2.00004	84.3983	2.00004	92.6925	2.00004	100.986
2.01671	59.0854	2.01671	89.2328	2.01671	89.2328	2.01671	89.2328	2.01671	89.2328	2.01671	89.2328	2.01671	89.2328	2.01671	89.2328	2.01671	84.9656	2.01671	89.0911	2.01671	99.6237
2.03337	59.0854	2.03337	82.7237	2.03337	82.7237	2.03337	82.7237	2.03337	82.7237	2.03337	82.7237	2.03337	82.7237	2.03337	82.7237	2.03337	74.1887	2.03337	82.3978	2.03337	89.852
2.05004	67.8354	2.05004	85.7761	2.05004	85.7761	2.05004	85.7761	2.05004	85.7761	2.05004	85.7761	2.05004	85.7761	2.05004	85.7761	2.05004	74.8962	2.05004	90.1074	2.05004	99.4529
2.06671	65.3354	2.06671	88.993	2.06671	88.993	2.06671	88.993	2.06671	88.993	2.06671	88.993	2.06671	88.993	2.06671	88.993	2.06671	94.7509	2.06671	89.5055	2.06671	99.1398
2.08338	62.8354	2.08338	88.8092	2.08338	88.8092	2.08338	88.8092	2.08338	88.8092	2.08338	88.8092	2.08338	88.8092	2.08338	88.8092	2.08338	85.0523	2.08338	99.168	2.08338	100.382
2.10004	65.3354	2.10004	85.8371	2.10004	85.8371	2.10004	85.8371	2.10004	85.8371	2.10004	85.8371	2.10004	85.8371	2.10004	85.8371	2.10004	93.3269	2.10004	90.1683	2.10004	91.6405
2.11671	69.0855	2.11671	83.7612	2.11671	83.7612	2.11671	83.7612	2.11671	83.7612	2.11671	83.7612	2.11671	83.7612	2.11671	83.7612	2.11671	87.817	2.11671	81.0532	2.11671	91.7405
2.13338	65.3355	2.13338	82.3983	2.13338	82.3983	2.13338	82.3983	2.13338	82.3983	2.13338	82.3983	2.13338	82.3983	2.13338	82.3983	2.13338	84.2296	2.13338	92.1259	2.13338	93.396
2.15004	72.8355	2.15004	87.3456	2.15004	87.3456	2.15004	87.3456	2.15004	87.3456	2.15004	87.3456	2.15004	87.3456	2.15004	87.3456	2.15004	80.3729	2.15004	99.9839	2.15004	98.1522
2.16671	66.5855	2.16671	88.943	2.16671	88.943	2.16671	88.943	2.16671	88.943	2.16671	88.943	2.16671	88.943	2.16671	88.943	2.16671	86.33	2.16671	85.305	2.16671	97.7119
2.18338	56.5855	2.18338	94.5163	2.18338	94.5163	2.18338	94.5163	2.18338	94.5163	2.18338	94.5163	2.18338	94.5163	2.18338	94.5163	2.18338	86.1908	2.18338	93.4269	2.18338	92.4708
2.20004	62.8355	2.20004	84.64	2.20004	84.64	2.20004	84.64	2.20004	84.64	2.20004	84.64	2.20004	84.64	2.20004	84.64	2.20004	95.9775	2.20004	92.5886	2.20004	93.5994
2.21671	66.5855	2.21671	96.2795	2.21671	96.2795	2.21671	96.2795	2.21671	96.2795	2.21671	96.2795	2.21671	96.2795	2.21671	96.2795	2.21671	82.1022	2.21671	94.9667	2.21671	91.7055
2.23338	65.3355	2.23338	80.7696	2.23338	80.7696	2.23338	80.7696	2.23338	80.7696	2.23338	80.7696	2.23338	80.7696	2.23338	80.7696	2.23338	93.1011	2.23338	96.5242	2.23338	96.7089
2.25005	71.5855	2.25005	92.9865	2.25005	92.9865	2.25005	92.9865	2.25005	92.9865	2.25005	92.9865	2.25005	92.9865	2.25005	92.9865	2.25005	86.6581	2.25005	109.87	2.25005	92.6138
2.26671	72.8355	2.26671	87.7176	2.26671	87.7176	2.26671	87.7176	2.26671	87.7176	2.26671	87.7176	2.26671	87.7176	2.26671	87.7176	2.26671	89.8973	2.26671	98.3829	2.26671	97.0181
2.28338	70.3355	2.28338	92.3937	2.28338	92.3937	2.28338	92.3937	2.28338	92.3937	2.28338	92.3937	2.28338	92.3937	2.28338	92.3937	2.28338	94.1721	2.28338	99.9319	2.28338	97.4623
2.30005	72.8355	2.30005	96.1419	2.30005	96.1419	2.30005	96.1419	2.30005	96.1419	2.30005	96.1419	2.30005	96.1419	2.30005	96.1419	2.30005	100.451	2.30005	95.5305	2.30005	91.0157
2.31671	71.5855	2.31671	94.0103	2.31671	94.0103	2.31671	94.0103	2.31671	94.0103	2.31671	94.0103	2.31671	94.0103	2.31671	94.0103	2.31671	89.9515	2.31671	94.0646	2.31671	112.59
2.33338	56.5855	2.33338	97.5216	2.33338	97.5216	2.33338	97.5216	2.33338	97.5216	2.33338	97.5216	2.33338	97.5216	2.33338	97.5216	2.33338	104.779	2.33338	97.0869	2.33338	98.8233
2.35005	66.5856	2.35005	98.7072	2.35005	98.7072	2.35005	98.7072	2.35005	98.7072	2.35005	98.7072	2.35005	98.7072	2.35005	98.7072	2.35005	89.4642	2.35005	87.7927	2.35005	102.75
2.36671	76.5856	2.36671	92.8192	2.36671	92.8192	2.36671	92.8192	2.36671	92.8192	2.36671	92.8192	2.36671	92.8192	2.36671	92.8192	2.36671	105.558	2.36671	97.0007	2.36671	105.87
2.38338	71.5856	2.38338	90.8847	2.38338	90.8847	2.38338	90.8847	2.38338	90.8847	2.38338	90.8847	2.38338	90.8847	2.38338	90.8847	2.38338	97.5553	2.38338	95.6053	2.38338	111.815
2.40005	84.0856	2.40005	109.998	2.40005	109.998	2.40005	109.998	2.40005	109.998	2.40005	109.998	2.40005	109.998	2.40005	109.998	2.40005	103.119	2.40005	93.7979	2.40005	102.32
2.41672	81.5856	2.41672	103.107	2.41672	103.107	2.41672	103.107	2.41672	103.107	2.41672	103.107	2.41672	103.107	2.41672	103.107	2.41672	96.0637	2.41672	94.0957	2.41672	109.996
2.43338	84.0856	2.43338	101.82	2.43338	101.82	2.43338	101.82	2.43338	101.82	2.43338	101.82	2.43338	101.82	2.43338	101.82	2.43338	104.481	2.43338	94.6688	2.43338	115.016
2.45005	70.3356	2.45005	95.8905	2.45005	95.8905	2.45005	95.8905	2.45005	95.8905	2.45005	95.8905	2.45005	95.8905	2.45005	95.8905	2.45005	91.6897	2.45005	98.4645	2.45005	115.093
2.46672	82.8356	2.46672	94.5571	2.46672	94.5571	2.46672	94.5571	2.46672	94.5571	2.46672	94.5571	2.46672	94.5571	2.46672	94.5571	2.46672	98.2327	2.46672	103.084	2.46672	109.451
2.48338	76.5856	2.48338	101.888	2.48338	101.888	2.48338	101.888	2.48338	101.888	2.48338	101.888	2.48338	101.888	2.48338	101.888	2.48338	97.1743	2.48338	85.8645	2.48338	120.774
2.50005	75.3356	2.50005	102.638	2.50005	102.638	2.50005	102.638	2.50005	102.638	2.50005	102.638	2.50005	102.638	2.50005	102.638	2.50005	98.3822	2.50005	96.7661	2.50005	123.447
2.51672	90.3356	2.51672	102.302	2.51672	102.302	2.51672	102.302	2.51672	102.302	2.51672	102.302	2.51672	102.302	2.51672	102.302	2.51672	98.5334	2.51672	107.573	2.51672	124.361
2.53338	79.0856	2.53338	99.6849	2.53338	99.6849	2.53338	99.6849	2.53338	99.6849	2.53338	99.6849	2.53338	99.6849	2.53338	99.6849	2.53338	102.458	2.53338	98.4852	2.53338	125.605
2.55005	85.3356	2.55005	102.698	2.55005	102.698	2.55005	102.698	2.55005	102.698	2.55005	102.698	2.55005	102.698	2.55005	102.698	2.55005	99.7213	2.55005	103.422	2.55005	122.673
2.56672	86.5856	2.56672	107.8	2.56672	107.8	2.56672	107.8	2.56672	107.8	2.56672	107.8	2.56672	107.8	2.56672	107.8	2.56672	99.5217	2.56672	109.758	2.56672	130.531
2.58339	94.0857	2.58339	115.749	2.58339	115.749	2.58339	115.749	2.58339	115.749	2.58339	115.749	2.58339	115.749	2.58339	115.749	2.58339	107.121	2.58339	91.7449	2.58339	124.771
2.60005	84.0857	2.60005	112.931	2.60005	112.931	2.60005	112.931	2.60005	112.931	2.60005	112.931	2.60005	112.931	2.60005	112.931	2.60005	113.95	2.60005	102.053	2.60005	118.362
2.61672	91.5857	2.61672	118.195	2.61672	118.195	2.61672	118.195	2.61672	118.195	2.61672	118.195	2.61672	118.195	2.61672	118.195	2.61672	100.006	2.61672	110.353	2.61672	123.054
2.63339	97.8357	2.63339	111.115	2.63339	111.115	2.63339	111.115	2.63339	111.115	2.63339	111.115	2.63339	111.115	2.63339	111.115	2.63339	108.515	2.63339	113.822	2.63339	125.631
2.65005	85.3357	2.65005	110.576	2.65005	110.576	2.65005	110.576	2.65005	110.576	2.65005	110.576	2.65005	110.576	2.65005	110.576	2.65005	106.004	2.65005	103.303	2.65005	129.544
2.66672	94.0857	2.66672	112.824	2.66672	112.824	2.66672	112.824	2.66672	112.824	2.66672	112.824	2.66672	112.824	2.66672	112.824	2.66672	121.637	2.66672	107.189	2.66672	128.852
2.68339	100.336	2.68339	110.593	2.68339	110.593	2.68339	110.593	2.68339	110.593	2.68339	110.593	2.68339	110.593	2.68339	110.593	2.68339	115.077	2.68339	109.577	2.68339	132.987
2.70005	87.8357	2.70005	119.848	2.70005	119.848	2.70005	119.848	2.70005	119.848	2.70005	119.848	2.70005	119.848	2.70005	119.848	2.70005	109.994	2.70005	115.633	2.70005	134.036
2.71672	92.8357	2.71672	122.918	2.71672	122.918	2.71672	122.918	2.71672	122.918	2.71672	122.918	2.71672	122.918	2.71672	122.918	2.71672	119.593	2.71672	119.249	2.71672	129.01
2.73339	99.0857	2.73339	122.353	2.73339	122.353	2.73339	122.353	2.73339	122.353	2.73339	122.353	2.73339	122.353	2.73339	122.353	2.73339	128.667	2.73339	124.607	2.73339	125.344
2.75006	92.8357	2.75006	115.993	2.75006	115.993	2.75006	115.993	2.75006	115.993	2.75006	115.993	2.75006	115.993	2.75006	115.993	2.75006	126.331	2.75006	113.245	2.75006	128.661
2.76672	104.086	2.76672	118.064	2.76672	118.064	2.76672	118.064	2.76672	118.064	2.76672	118.064	2.76672	118.064	2.76672	118.064	2.76672	124.321	2.76672	120.986	2.76672	129.67
2.78339	94.0857	2.78339	118.86	2.78339	118.86	2.78339	118.86	2.78339	118.86	2.78339	118.86	2.78339	118.86	2.78339	118.86	2.78339	128.773	2.78339	127.066	2.78339	121.026
2.80006	105.336	2.80006	119.315	2.80006	119.315	2.80006	119.315	2.80006	119.315	2.80006	119.315	2.80006	119.315	2.80006	119.315	2.80006	119.761	2.80006	125.233	2.80006	140.361
2.81672	99.0858	2.81672	131.078	2.81672	131.078	2.81672	131.078	2.81672	131.078	2.81672	131.078	2.81672	131.078	2.81672	131.078	2.81672	126.363	2.81672	118.593	2.81672	138.22
2.83339	84.0858	2.83339	126.375	2.83339	126.375	2.83339	126.375	2.83339	126.375	2.83339	126.375	2.83339	126.375	2.83339	126.375	2.83339	121.508	2.83339	124.755	2.83339	136.028
2.85006	104.086	2.85006	126.559	2.85006	126.559	2.85006	126.559	2.85006	126.559	2.85006	126.559	2.85006	126.559	2.85006	126.559	2.85006	125.558	2.85006	125.423	2.85006	141.466
2.86672	100.336	2.86672	123.602	2.86672	123.602	2.86672	123.602	2.86672	123.602	2.86672	123.602	2.86672	123.602	2.86672	123.602	2.86672	130.293	2.86672	122.775	2.86672	146.856
2.88339	95.3358	2.88339	123.605	2.88339	123.605	2.88339	123.605	2.88339	123.605	2.88339	123.605	2.88339	123.605	2.88339	123.605	2.88339	124.837	2.88339	127.017	2.88339	146.114
2.90006	110.336	2.90006	125.592	2.90006	125.592	2.90006	125.592	2.90006	125.592	2.90006	125.592	2.90006	125.592	2.90006	125.592	2.90006	127.204	2.90006	125.239	2.90006	154.533
2.91673	102.836	2.91673	120.439	2.91673	120.439	2.91673	120.439	2.91673	120.439	2.91673	120.439	2.91673	120.439	2.91673	120.439	2.91673	125.846	2.91673	130.407	2.91673	152.557
2.93339	100.336	2.93339	135.084	2.93339	135.084	2.93339	135.084	2.93339	135.084	2.93339	135.084	2.93339	135.084	2.93339	135.084	2.93339	126.274	2.93339	134.442	2.93339	150.698
2.95006	95.3358	2.95006	121.571	2.95006	121.571	2.95006	121.571	2.95006	121.571	2.95006	121.571	2.95006	121.571	2.95006	121.571	2.95006	116.245	2.95006	137.273	2.95006	157.769
2.96673	92.8358	2.96673	127.166	2.96673	127.166	2.96673	127.166	2.96673	127.166	2.96673	127.166	2.96673	127.166	2.96673	127.166	2.96673	130.337	2.96673	145.195	2.96673	158.897
2.98339	90.3358	2.98339	127.731	2.98339	127.731	2.98339	127.731	2.98339	127.731	2.98339	127.731	2.98339	127.731	2.98339	127.731	2.98339	125.263	2.98339	145.522	2.98339	156.199
3.00006	95.3358	3.00006	124.661	3.00006	124.661	3.00006	124.661	3.00006	124.661	3.00006	124.661	3.00006	124.661	3.00006	124.661	3.00006	125.319	3.00006	148.756	3.00006	154.97
3.01673	101.586	3.01673	119.23	3.01673	119.23	3.01673	119.23	3.01673	119.23	3.01673	119.23	3.01673	119.23	3.01673	119.23	3.01673	128.209	3.01673	148.734	3.01673	160.576
3.03339	100.336	3.03339	132.916	3.03339	132.916	3.03339	132.916	3.03339	132.916	3.03339	132.916	3.03339	132.916	3.03339	132.916	3.03339	130.397	3.03339	160.089	3.03339	157.506
3.05006	117.836	3.05006	129.18	3.05006	129.18	3.05006	129.18	3.05006	129.18	3.05006	129.18	3.05006	129.18	3.05006	129.18	3.05006	125.16	3.05006	155.494	3.05006	166.33
3.06673	114.086	3.06673	135.667	3.06673	135.667	3.06673	135.667	3.06673	135.667	3.06673	135.667	3.06673	135.667	3.06673	135.667	3.06673	134.283	3.06673	160.589	3.06673	152.432
3.0834	102.836	3.0834	128.679	3.0834	128.679	3.0834	128.679	3.0834	128.679	3.0834	128.679	3.0834	128.679	3.0834	128.679	3.0834	127.21	3.0834	162.493	3.0834	159.709
3.10006	102.836	3.10006	136.497	3.10006	136.497	3.10006	136.497	3.10006	136.497	3.10006	136.497	3.10006	136.497	3.10006	136.497	3.10006	131.689	3.10006	162.049	3.10006	160.526
3.11673	116.586	3.11673	128.863	3.11673	128.863	3.11673	128.863	3.11673	128.863	3.11673	128.863	3.11673	128.863	3.11673	128.863	3.11673	133.752	3.11673	160.809	3.11673	158.824
3.1334	109.086	3.1334	130.805	3.1334	130.805	3.1334	130.805	3.1334	130.805	3.1334	130.805	3.1334	130.805	3.1334	130.805	3.1334	136.726	3.1334	153.341	3.1334	7.34871
3.15006	110.336	3.15006	128.508	3.15006	128.508	3.15006	128.508	3.15006	128.508	3.15006	128.508	3.15006	128.508	3.15006	128.508	3.15006	131.008	3.15006	155.341	3.15006	4.90823
3.16673	109.086	3.16673	128.07	3.16673	128.07	3.16673	128.07	3.16673	128.07	3.16673	128.07	3.16673	128.07	3.16673	128.07	3.16673	132.162	3.16673	157.35	3.16673	-5.07207
3.1834	109.086	3.1834	130.562	3.1834	130.562	3.1834	130.562	3.1834	130.562	3.1834	130.562	3.1834	130.562	3.1834	130.562	3.1834	131.771	3.1834	163.584	3.1834	6.65414
3.20006	115.336	3.20006	145.771	3.20006	145.771	3.20006	145.771	3.20006	145.771	3.20006	145.771	3.20006	145.771	3.20006	145.771	3.20006	144.357	3.20006	150.201	3.20006	4.3683
3.21673	109.086	3.21673	130.894	3.21673	130.894	3.21673	130.894	3.21673	130.894	3.21673	130.894	3.21673	130.894	3.21673	130.894	3.21673	142.319	3.21673	153.093	3.21673	6.22875
3.2334	107.836	3.2334	135.946	3.2334	135.946	3.2334	135.946	3.2334	135.946	3.2334	135.946	3.2334	135.946	3.2334	135.946	3.2334	149.539	3.2334	159.551	3.2334	3.45225
3.25007	110.336	3.25007	140.753	3.25007	140.753	3.25007	140.753	3.25007	140.753	3.25007	140.753	3.25007	140.753	3.25007	140.753	3.25007	138.129	3.25007	158.938	3.25007	-0.73505
3.26673	110.336	3.26673	135.784	3.26673	135.784	3.26673	135.784	3.26673	135.784	3.26673	135.784	3.26673	135.784	3.26673	135.784	3.26673	132.564	3.26673	156.638	3.26673	8.57887
3.2834	120.336	3.2834	138.318	3.2834	138.318	3.2834	138.318	3.2834	138.318	3.2834	138.318	3.2834	138.318	3.2834	138.318	3.2834	145.761	3.2834	160.76	3.2834	5.81827
3.30007	122.836	3.30007	148.525	3.30007	148.525	3.30007	148.525	3.30007	148.525	3.30007	148.525	3.30007	148.525	3.30007	148.525	3.30007	144.072	3.30007	161.269	3.30007	6.62169
3.31673	112.836	3.31673	138.738	3.31673	138.738	3.31673	138.738	3.31673	138.738	3.31673	138.738	3.31673	138.738	3.31673	138.738	3.31673	147.833	3.31673	168.705	3.31673	13.4354
3.3334	117.836	3.3334	138.3	3.3334	138.3	3.3334	138.3	3.3334	138.3	3.3334	138.3	3.3334	138.3	3.3334	138.3	3.3334	144.289	3.3334	167.805	3.3334	15.0343
3.35007	124.086	3.35007	150.183	3.35007	150.183	3.35007	150.183	3.35007	150.183	3.35007	150.183	3.35007	150.183	3.35007	150.183	3.35007	149.673	3.35007	165.19	3.35007	14.7703
3.36673	122.836	3.36673	153.359	3.36673	153.359	3.36673	153.359	3.36673	153.359	3.36673	153.359	3.36673	153.359	3.36673	153.359	3.36673	154.891	3.36673	159.272	3.36673	10.6728
3.3834	125.336	3.3834	145.462	3.3834	145.462	3.3834	145.462	3.3834	145.462	3.3834	145.462	3.3834	145.462	3.3834	145.462	3.3834	153.421	3.3834	165.432	3.3834	13.906
3.40007	115.336	3.40007	144.224	3.40007	144.224	3.40007	144.224	3.40007	144.224	3.40007	144.224	3.40007	144.224	3.40007	144.224	3.40007	161.674	3.40007	164.285	3.40007	10.3772
3.41674	126.586	3.41674	148.085	3.41674	148.085	3.41674	148.085	3.41674	148.085	3.41674	148.085	3.41674	148.085	3.41674	148.085	3.41674	150.14	3.41674	158.375	3.41674	17.3065
3.4334	129.086	3.4334	155.028	3.4334	155.028	3.4334	155.028	3.4334	155.028	3.4334	155.028	3.4334	155.028	3.4334	155.028	3.4334	147.214	3.4334	164.173	3.4334	7.65284
3.45007	124.086	3.45007	156.957	3.45007	156.957	3.45007	156.957	3.45007	156.957	3.45007	156.957	3.45007	156.957	3.45007	156.957	3.45007	147.956	3.45007	161.785	3.45007	13.4408
3.46674	126.586	3.46674	148.203	3.46674	148.203	3.46674	148.203	3.46674	148.203	3.46674	148.203	3.46674	148.203	3.46674	148.203	3.46674	150.695	3.46674	158.592	3.46674	16.0045
3.4834	122.836	3.4834	149.553	3.4834	149.553	3.4834	149.553	3.4834	149.553	3.4834	149.553	3.4834	149.553	3.4834	149.553	3.4834	153.339	3.4834	171.948	3.4834	10.6662
3.50007	120.336	3.50007	151.421	3.50007	151.421	3.50007	151.421	3.50007	151.421	3.50007	151.421	3.50007	151.421	3.50007	151.421	3.50007	153.721	3.50007	160.123	3.50007	19.3228
3.51674	126.586	3.51674	163.428	3.51674	163.428	3.51674	163.428	3.51674	163.428	3.51674	163.428	3.51674	163.428	3.51674	163.428	3.51674	160.806	3.51674	161.363	3.51674	13.6048
3.5334	130.336	3.5334	153.786	3.5334	153.786	3.5334	153.786	3.5334	153.786	3.5334	153.786	3.5334	153.786	3.5334	153.786	3.5334	157.488	3.5334	161.731	3.5334	7.01535
3.55007	135.336	3.55007	151.832	3.55007	151.832	3.55007	151.832	3.55007	151.832	3.55007	151.832	3.55007	151.832	3.55007	151.832	3.55007	142.323	3.55007	164.372	3.55007	13.685
3.56674	122.836	3.56674	150.582	3.56674	150.582	3.56674	150.582	3.56674	150.582	3.56674	150.582	3.56674	150.582	3.56674	150.582	3.56674	154	3.56674	159.828	3.56674	16.6205
3.58341	149.086	3.58341	154.813	3.58341	154.813	3.58341	154.813	3.58341	154.813	3.58341	154.813	3.58341	154.813	3.58341	154.813	3.58341	155.582	3.58341	167.903	3.58341	18.1708
3.60007	150.336	3.60007	152.896	3.60007	152.896	3.60007	152.896	3.60007	152.896	3.60007	152.896	3.60007	152.896	3.60007	152.896	3.60007	157.378	3.60007	168.086	3.60007	21.5712
3.61674	140.336	3.61674	153.718	3.61674	153.718	3.61674	153.718	3.61674	153.718	3.61674	153.718	3.61674	153.718	3.61674	153.718	3.61674	147.489	3.61674	165.3	3.61674	22.1345
3.63341	152.836	3.63341	152.739	3.63341	152.739	3.63341	152.739	3.63341	152.739	3.63341	152.739	3.63341	152.739	3.63341	152.739	3.63341	174.9	3.63341	164.071	3.63341	14.9886
3.65007	149.086	3.65007	160.162	3.65007	160.162	3.65007	160.162	3.65007	160.162	3.65007	160.162	3.65007	160.162	3.65007	160.162	3.65007	169.811	3.65007	168.928	3.65007	23.8149
3.66674	136.586	3.66674	150.506	3.66674	150.506	3.66674	150.506	3.66674	150.506	3.66674	150.506	3.66674	150.506	3.66674	150.506	3.66674	174.713	3.66674	160.683	3.66674	13.1757
3.68341	134.086	3.68341	161.624	3.68341	161.624	3.68341	161.624	3.68341	161.624	3.68341	161.624	3.68341	161.624	3.68341	161.624	3.68341	169.661	3.68341	172.352	3.68341	14.9808
3.70007	142.836	3.70007	173.29	3.70007	173.29	3.70007	173.29	3.70007	173.29	3.70007	173.29	3.70007	173.29	3.70007	173.29	3.70007	177.302	3.70007	172.526	3.70007	18.5688
3.71674	135.336	3.71674	162.931	3.71674	162.931	3.71674	162.931	3.71674	162.931	3.71674	162.931	3.71674	162.931	3.71674	162.931	3.71674	180.962	3.71674	165.693	3.71674	11.9707
3.73341	137.836	3.73341	166.304	3.73341	166.304	3.73341	166.304	3.73341	166.304	3.73341	166.304	3.73341	166.304	3.73341	166.304	3.73341	180.207	3.73341	166.364	3.73341	17.1336
3.75008	145.336	3.75008	162.326	3.75008	162.326	3.75008	162.326	3.75008	162.326	3.75008	162.326	3.75008	162.326	3.75008	162.326	3.75008	172.5	3.75008	171.893	3.75008	12.4215
3.76674	151.586	3.76674	169.441	3.76674	169.441	3.76674	169.441	3.76674	169.441	3.76674	169.441	3.76674	169.441	3.76674	169.441	3.76674	173.676	3.76674	185.035	3.76674	19.9586
3.78341	155.336	3.78341	158.845	3.78341	158.845	3.78341	158.845	3.78341	158.845	3.78341	158.845	3.78341	158.845	3.78341	158.845	3.78341	175.454	3.78341	11.3669	3.78341	22.32
3.80008	160.336	3.80008	164.098	3.80008	164.098	3.80008	164.098	3.80008	164.098	3.80008	164.098	3.80008	164.098	3.80008	164.098	3.80008	176.52	3.80008	-0.402335	3.80008	17.88
3.81674	166.586	3.81674	172.239	3.81674	172.239	3.81674	172.239	3.81674	172.239	3.81674	172.239	3.81674	172.239	3.81674	172.239	3.81674	169.607	3.81674	8.74584	3.81674	30.4685
3.83341	160.336	3.83341	167.348	3.83341	167.348	3.83341	167.348	3.83341	167.348	3.83341	167.348	3.83341	167.348	3.83341	167.348	3.83341	3.16187	3.83341	10.6279	3.83341	14.2209
3.85008	164.086	3.85008	173.287	3.85008	173.287	3.85008	173.287	3.85008	173.287	3.85008	173.287	3.85008	173.287	3.85008	173.287	3.85008	9.56311	3.85008	2.52012	3.85008	17.6868
3.86674	169.086	3.86674	174.198	3.86674	174.198	3.86674	174.198	3.86674	174.198	3.86674	174.198	3.86674	174.198	3.86674	174.198	3.86674	5.6361	3.86674	7.16041	3.86674	18.7371
3.88341	162.836	3.88341	161.12	3.88341	161.12	3.88341	161.12	3.88341	161.12	3.88341	161.12	3.88341	161.12	3.88341	161.12	3.88341	3.63865	3.88341	20.2477	3.88341	17.1358
3.90008	160.336	3.90008	169.621	3.90008	169.621	3.90008	169.621	3.90008	169.621	3.90008	169.621	3.90008	169.621	3.90008	169.621	3.90008	0.786114	3.90008	16.6976	3.90008	9.65967
3.91675	155.336	3.91675	164.259	3.91675	164.259	3.91675	164.259	3.91675	164.259	3.91675	164.259	3.91675	164.259	3.91675	164.259	3.91675	10.6162	3.91675	11.3155	3.91675	20.8609
3.93341	162.836	3.93341	171.65	3.93341	171.65	3.93341	171.65	3.93341	171.65	3.93341	171.65	3.93341	171.65	3.93341	171.65	3.93341	8.99502	3.93341	12.8477	3.93341	16.2907
3.95008	154.086	3.95008	172.044	3.95008	172.044	3.95008	172.044	3.95008	172.044	3.95008	172.044	3.95008	172.044	3.95008	172.044	3.95008	5.54039	3.95008	25.6918	3.95008	18.8686
3.96675	152.836	3.96675	4.13971	3.96675	4.13971	3.96675	4.13971	3.96675	4.13971	3.96675	4.13971	3.96675	4.13971	3.96675	4.13971	3.96675	5.80705	3.96675	18.7356	3.96675	24.1881
3.98341	155.336	3.98341	-1.2957	3.98341	-1.2957	3.98341	-1.2957	3.98341	-1.2957	3.98341	-1.2957	3.98341	-1.2957	3.98341	-1.2957	3.98341	6.96651	3.98341	31.7729	3.98341	22.998
4.00008	144.086	4.00008	1.89774	4.00008	1.89774	4.00008	1.89774	4.00008	1.89774	4.00008	1.89774	4.00008	1.89774	4.00008	1.89774	4.00008	16.4704	4.00008	19.815	4.00008	29.6295
4.01675	140.336	4.01675	-5.61837	4.01675	-5.61837	4.01675	-5.61837	4.01675	-5.61837	4.01675	-5.61837	4.01675	-5.61837	4.01675	-5.61837	4.01675	21.8968	4.01675	27.8707	4.01675	31.1532
4.03341	150.336	4.03341	9.93899	4.03341	9.93899	4.03341	9.93899	4.03341	9.93899	4.03341	9.93899	4.03341	9.93899	4.03341	9.93899	4.03341	6.63768	4.03341	11.3053	4.03341	37.1434
4.05008	159.086	4.05008	-0.222728	4.05008	-0.222728	4.05008	-0.222728	4.05008	-0.222728	4.05008	-0.222728	4.05008	-0.222728	4.05008	-0.222728	4.05008	15.8881	4.05008	14.6842	4.05008	27.4033
4.06675	142.836	4.06675	-2.36992	4.06675	-2.36992	4.06675	-2.36992	4.06675	-2.36992	4.06675	-2.36992	4.06675	-2.36992	4.06675	-2.36992	4.06675	13.2929	4.06675	22.0147	4.06675	25.2042
4.08342	160.336	4.08342	6.4438	4.08342	6.4438	4.08342	6.4438	4.08342	6.4438	4.08342	6.4438	4.08342	6.4438	4.08342	6.4438	4.08342	17.1135	4.08342	27.4952	4.08342	29.3619
4.10008	160.336	4.10008	11.371	4.10008	11.371	4.10008	11.371	4.10008	11.371	4.10008	11.371	4.10008	11.371	4.10008	11.371	4.10008	9.27714	4.10008	16.9138	4.10008	25.9222
4.11675	152.836	4.11675	-0.291582	4.11675	-0.291582	4.11675	-0.291582	4.11675	-0.291582	4.11675	-0.291582	4.11675	-0.291582	4.11675	-0.291582	4.11675	20.8441	4.11675	24.5399	4.11675	35.0743
4.13342	166.586	4.13342	9.46892	4.13342	9.46892	4.13342	9.46892	4.13342	9.46892	4.13342	9.46892	4.13342	9.46892	4.13342	9.46892	4.13342	18.9087	4.13342	26.4528	4.13342	35.4305
4.15008	152.836	4.15008	10.4738	4.15008	10.4738	4.15008	10.4738	4.15008	10.4738	4.15008	10.4738	4.15008	10.4738	4.15008	10.4738	4.15008	31.4711	4.15008	25.0622	4.15008	34.0691
4.16675	165.336	4.16675	12.3231	4.16675	12.3231	4.16675	12.3231	4.16675	12.3231	4.16675	12.3231	4.16675	12.3231	4.16675	12.3231	4.16675	13.1052	4.16675	29.2749	4.16675	45.3102
4.18342	162.836	4.18342	8.79317	4.18342	8.79317	4.18342	8.79317	4.18342	8.79317	4.18342	8.79317	4.18342	8.79317	4.18342	8.79317	4.18342	14.8048	4.18342	26.9918	4.18342	41.7468
4.20008	164.086	4.20008	7.64369	4.20008	7.64369	4.20008	7.64369	4.20008	7.64369	4.20008	7.64369	4.20008	7.64369	4.20008	7.64369	4.20008	21.8825	4.20008	27.5737	4.20008	40.2645
4.21675	166.586	4.21675	11.9266	4.21675	11.9266	4.21675	11.9266	4.21675	11.9266	4.21675	11.9266	4.21675	11.9266	4.21675	11.9266	4.21675	27.7681	4.21675	24.1794	4.21675	46.4627
4.23342	166.586	4.23342	13.238	4.23342	13.238	4.23342	13.238	4.23342	13.238	4.23342	13.238	4.23342	13.238	4.23342	13.238	4.23342	10.2796	4.23342	18.7686	4.23342	36.5212
4.25009	159.086	4.25009	9.73133	4.25009	9.73133	4.25009	9.73133	4.25009	9.73133	4.25009	9.73133	4.25009	9.73133	4.25009	9.73133	4.25009	19.5032	4.25009	26.6286	4.25009	56.8462
4.26675	160.336	4.26675	6.38425	4.26675	6.38425	4.26675	6.38425	4.26675	6.38425	4.26675	6.38425	4.26675	6.38425	4.26675	6.38425	4.26675	15.593	4.26675	33.0706	4.26675	52.8395
4.28342	144.086	4.28342	17.9491	4.28342	17.9491	4.28342	17.9491	4.28342	17.9491	4.28342	17.9491	4.28342	17.9491	4.28342	17.9491	4.28342	30.5532	4.28342	25.0832	4.28342	51.7967
4.30009	159.086	4.30009	10.3659	4.30009	10.3659	4.30009	10.3659	4.30009	10.3659	4.30009	10.3659	4.30009	10.3659	4.30009	10.3659	4.30009	27.7957	4.30009	19.3853	4.30009	53.4338
4.31675	161.586	4.31675	15.8242	4.31675	15.8242	4.31675	15.8242	4.31675	15.8242	4.31675	15.8242	4.31675	15.8242	4.31675	15.8242	4.31675	19.0388	4.31675	29.997	4.31675	54.6339
4.33342	160.336	4.33342	6.83639	4.33342	6.83639	4.33342	6.83639	4.33342	6.83639	4.33342	6.83639	4.33342	6.83639	4.33342	6.83639	4.33342	23.1819	4.33342	25.0327	4.33342	53.5417
4.35009	156.586	4.35009	8.85656	4.35009	8.85656	4.35009	8.85656	4.35009	8.85656	4.35009	8.85656	4.35009	8.85656	4.35009	8.85656	4.35009	25.0402	4.35009	29.1545	4.35009	60.9609
4.36675	155.336	4.36675	18.9075	4.36675	18.9075	4.36675	18.9075	4.36675	18.9075	4.36675	18.9075	4.36675	18.9075	4.36675	18.9075	4.36675	24.8898	4.36675	24.4836	4.36675	53.9358
4.38342	144.086	4.38342	16.5108	4.38342	16.5108	4.38342	16.5108	4.38342	16.5108	4.38342	16.5108	4.38342	16.5108	4.38342	16.5108	4.38342	20.9992	4.38342	23.4066	4.38342	56.0936
4.40009	166.586	4.40009	23.7101	4.40009	23.7101	4.40009	23.7101	4.40009	23.7101	4.40009	23.7101	4.40009	23.7101	4.40009	23.7101	4.40009	17.4299	4.40009	32.6108	4.40009	52.9451
4.41676	149.086	4.41676	22.7501	4.41676	22.7501	4.41676	22.7501	4.41676	22.7501	4.41676	22.7501	4.41676	22.7501	4.41676	22.7501	4.41676	25.0081	4.41676	30.8294	4.41676	59.5541
4.43342	152.836	4.43342	13.9119	4.43342	13.9119	4.43342	13.9119	4.43342	13.9119	4.43342	13.9119	4.43342	13.9119	4.43342	13.9119	4.43342	18.616	4.43342	41.4126	4.43342	58.8483
4.45009	150.336	4.45009	18.4102	4.45009	18.4102	4.45009	18.4102	4.45009	18.4102	4.45009	18.4102	4.45009	18.4102	4.45009	18.4102	4.45009	22.3001	4.45009	37.8398	4.45009	61.6142
4.46676	151.586	4.46676	14.3619	4.46676	14.3619	4.46676	14.3619	4.46676	14.3619	4.46676	14.3619	4.46676	14.3619	4.46676	14.3619	4.46676	25.3475	4.46676	45.0441	4.46676	59.9468
4.48342	159.086	4.48342	26.6291	4.48342	26.6291	4.48342	26.6291	4.48342	26.6291	4.48342	26.6291	4.48342	26.6291	4.48342	26.6291	4.48342	25.1589	4.48342	43.6058	4.48342	63.2587
4.50009	162.836	4.50009	27.9932	4.50009	27.9932	4.50009	27.9932	4.50009	27.9932	4.50009	27.9932	4.50009	27.9932	4.50009	27.9932	4.50009	27.5141	4.50009	37.5576	4.50009	68.07
4.51676	155.336	4.51676	16.896	4.51676	16.896	4.51676	16.896	4.51676	16.896	4.51676	16.896	4.51676	16.896	4.51676	16.896	4.51676	36.716	4.51676	35.8954	4.51676	76.4806
4.53342	174.086	4.53342	27.8023	4.53342	27.8023	4.53342	27.8023	4.53342	27.8023	4.53342	27.8023	4.53342	27.8023	4.53342	27.8023	4.53342	24.6782	4.53342	41.1521	4.53342	65.1779
4.55009	159.087	4.55009	26.5012	4.55009	26.5012	4.55009	26.5012	4.55009	26.5012	4.55009	26.5012	4.55009	26.5012	4.55009	26.5012	4.55009	33.3236	4.55009	30.9194	4.55009	63.2775
4.56676	157.837	4.56676	33.5653	4.56676	33.5653	4.56676	33.5653	4.56676	33.5653	4.56676	33.5653	4.56676	33.5653	4.56676	33.5653	4.56676	28.5459	4.56676	38.7151	4.56676	62.5411
4.58343	169.087	4.58343	23.5266	4.58343	23.5266	4.58343	23.5266	4.58343	23.5266	4.58343	23.5266	4.58343	23.5266	4.58343	23.5266	4.58343	28.209	4.58343	31.9454	4.58343	71.4585
4.60009	167.837	4.60009	28.7045	4.60009	28.7045	4.60009	28.7045	4.60009	28.7045	4.60009	28.7045	4.60009	28.7045	4.60009	28.7045	4.60009	30.8784	4.60009	42.3131	4.60009	67.3479
4.61676	150.337	4.61676	33.7998	4.61676	33.7998	4.61676	33.7998	4.61676	33.7998	4.61676	33.7998	4.61676	33.7998	4.61676	33.7998	4.61676	37.2449	4.61676	43.0764	4.61676	77.2789
4.63343	160.337	4.63343	28.78	4.63343	28.78	4.63343	28.78	4.63343	28.78	4.63343	28.78	4.63343	28.78	4.63343	28.78	4.63343	42.5703	4.63343	45.5067	4.63343	74.9629
4.65009	159.087	4.65009	41.178	4.65009	41.178	4.65009	41.178	4.65009	41.178	4.65009	41.178	4.65009	41.178	4.65009	41.178	4.65009	36.6897	4.65009	43.3692	4.65009	74.8952
4.66676	155.337	4.66676	26.2501	4.66676	26.2501	4.66676	26.2501	4.66676	26.2501	4.66676	26.2501	4.66676	26.2501	4.66676	26.2501	4.66676	39.8094	4.66676	47.4971	4.66676	77.178
4.68343	169.087	4.68343	27.5524	4.68343	27.5524	4.68343	27.5524	4.68343	27.5524	4.68343	27.5524	4.68343	27.5524	4.68343	27.5524	4.68343	44.4437	4.68343	32.7036	4.68343	77.7705
4.70009	161.587	4.70009	25.7581	4.70009	25.7581	4.70009	25.7581	4.70009	25.7581	4.70009	25.7581	4.70009	25.7581	4.70009	25.7581	4.70009	39.9508	4.70009	40.3577	4.70009	71.3856
4.71676	159.087	4.71676	38.5974	4.71676	38.5974	4.71676	38.5974	4.71676	38.5974	4.71676	38.5974	4.71676	38.5974	4.71676	38.5974	4.71676	43.0107	4.71676	35.3084	4.71676	82.0863
4.73343	162.837	4.73343	35.5063	4.73343	35.5063	4.73343	35.5063	4.73343	35.5063	4.73343	35.5063	4.73343	35.5063	4.73343	35.5063	4.73343	32.7318	4.73343	42.8595	4.73343	84.9359
4.75009	160.337	4.75009	35.9512	4.75009	35.9512	4.75009	35.9512	4.75009	35.9512	4.75009	35.9512	4.75009	35.9512	4.75009	35.9512	4.75009	35.2164	4.75009	41.3683	4.75009	83.5695
4.76676	1.61936	4.76676	34.7199	4.76676	34.7199	4.76676	34.7199	4.76676	34.7199	4.76676	34.7199	4.76676	34.7199	4.76676	34.7199	4.76676	38.647	4.76676	49.3205	4.76676	79.9085
4.78343	-0.880633	4.78343	36.946	4.78343	36.946	4.78343	36.946	4.78343	36.946	4.78343	36.946	4.78343	36.946	4.78343	36.946	4.78343	33.242	4.78343	46.3884	4.78343	82.5299
4.8001	1.61937	4.8001	44.2802	4.8001	44.2802	4.8001	44.2802	4.8001	44.2802	4.8001	44.2802	4.8001	44.2802	4.8001	44.2802	4.8001	43.0883	4.8001	39.9977	4.8001	81.4127
4.81676	0.369382	4.81676	39.381	4.81676	39.381	4.81676	39.381	4.81676	39.381	4.81676	39.381	4.81676	39.381	4.81676	39.381	4.81676	41.6935	4.81676	29.4966	4.81676	75.0632
4.83343	1.61939	4.83343	43.4944	4.83343	43.4944	4.83343	43.4944	4.83343	43.4944	4.83343	43.4944	4.83343	43.4944	4.83343	43.4944	4.83343	34.7336	4.83343	38.6387	4.83343	82.1596
4.8501	11.6194	4.8501	41.5672	4.8501	41.5672	4.8501	41.5672	4.8501	41.5672	4.8501	41.5672	4.8501	41.5672	4.8501	41.5672	4.8501	41.4181	4.8501	40.4495	4.8501	80.8322
4.86676	-3.3806	4.86676	44.118	4.86676	44.118	4.86676	44.118	4.86676	44.118	4.86676	44.118	4.86676	44.118	4.86676	44.118	4.86676	48.2017	4.86676	42.372	4.86676	86.1202
4.88343	-5.88059	4.88343	41.9008	4.88343	41.9008	4.88343	41.9008	4.88343	41.9008	4.88343	41.9008	4.88343	41.9008	4.88343	41.9008	4.88343	45.5421	4.88343	39.8999	4.88343	85.3075
4.9001	-0.880583	4.9001	46.3012	4.9001	46.3012	4.9001	46.3012	4.9001	46.3012	4.9001	46.3012	4.9001	46.3012	4.9001	46.3012	4.9001	54.2866	4.9001	38.9795	4.9001	90.0901
4.91677	9.11942	4.91677	41.374	4.91677	41.374	4.91677	41.374	4.91677	41.374	4.91677	41.374	4.91677	41.374	4.91677	41.374	4.91677	44.5386	4.91677	37.7419	4.91677	85.758
4.93343	4.11943	4.93343	48.8676	4.93343	48.8676	4.93343	48.8676	4.93343	48.8676	4.93343	48.8676	4.93343	48.8676	4.93343	48.8676	4.93343	51.4499	4.93343	38.1505	4.93343	72.7339
4.9501	9.11944	4.9501	44.2829	4.9501	44.2829	4.9501	44.2829	4.9501	44.2829	4.9501	44.2829	4.9501	44.2829	4.9501	44.2829	4.9501	64.0545	4.9501	37.486	4.9501	86.2865
4.96677	-2.13055	4.96677	48.3042	4.96677	48.3042	4.96677	48.3042	4.96677	48.3042	4.96677	48.3042	4.96677	48.3042	4.96677	48.3042	4.96677	41.5959	4.96677	36.0838	4.96677	83.9644
4.98343	-3.38055	4.98343	46.5505	4.98343	46.5505	4.98343	46.5505	4.98343	46.5505	4.98343	46.5505	4.98343	46.5505	4.98343	46.5505	4.98343	53.3412	4.98343	39.4471	4.98343	80.5953
5.0001	6.61946	5.0001	52.5867	5.0001	52.5867	5.0001	52.5867	5.0001	52.5867	5.0001	52.5867	5.0001	52.5867	5.0001	52.5867	5.0001	57.9234	5.0001	44.012	5.0001	84.9352
5.01677	7.86947	5.01677	51.6487	5.01677	51.6487	5.01677	51.6487	5.01677	51.6487	5.01677	51.6487	5.01677	51.6487	5.01677	51.6487	5.01677	57.4929	5.01677	43.0658	5.01677	87.6346
5.03343	6.61947	5.03343	43.3164	5.03343	43.3164	5.03343	43.3164	5.03343	43.3164	5.03343	43.3164	5.03343	43.3164	5.03343	43.3164	5.03343	65.0145	5.03343	44.78	5.03343	90.8951
5.0501	7.86948	5.0501	41.3398	5.0501	41.3398	5.0501	41.3398	5.0501	41.3398	5.0501	41.3398	5.0501	41.3398	5.0501	41.3398	5.0501	57.7312	5.0501	49.7952	5.0501	86.598
5.06677	7.86949	5.06677	52.19	5.06677	52.19	5.06677	52.19	5.06677	52.19	5.06677	52.19	5.06677	52.19	5.06677	52.19	5.06677	59.177	5.06677	39.1946	5.06677	90.5176
5.08344	14.1195	5.08344	56.6859	5.08344	56.6859	5.08344	56.6859	5.08344	56.6859	5.08344	56.6859	5.08344	56.6859	5.08344	56.6859	5.08344	68.661	5.08344	50.1014	5.08344	83.9983
5.1001	19.1195	5.1001	50.9337	5.1001	50.9337	5.1001	50.9337	5.1001	50.9337	5.1001	50.9337	5.1001	50.9337	5.1001	50.9337	5.1001	66.3764	5.1001	50.9633	5.1001	84.2625
5.11677	32.8695	5.11677	52.5101	5.11677	52.5101	5.11677	52.5101	5.11677	52.5101	5.11677	52.5101	5.11677	52.5101	5.11677	52.5101	5.11677	70.016	5.11677	53.2489	5.11677	85.4446
5.13344	26.6195	5.13344	51.3261	5.13344	51.3261	5.13344	51.3261	5.13344	51.3261	5.13344	51.3261	5.13344	51.3261	5.13344	51.3261	5.13344	66.2878	5.13344	65.2068	5.13344	89.6924
5.1501	25.3695	5.1501	44.7115	5.1501	44.7115	5.1501	44.7115	5.1501	44.7115	5.1501	44.7115	5.1501	44.7115	5.1501	44.7115	5.1501	75.0097	5.1501	58.4867	5.1501	85.3275
5.16677	22.8695	5.16677	47.2497	5.16677	47.2497	5.16677	47.2497	5.16677	47.2497	5.16677	47.2497	5.16677	47.2497	5.16677	47.2497	5.16677	68.1209	5.16677	57.6738	5.16677	82.3069
5.18344	11.6195	5.18344	50.3195	5.18344	50.3195	5.18344	50.3195	5.18344	50.3195	5.18344	50.3195	5.18344	50.3195	5.18344	50.3195	5.18344	70.1255	5.18344	58.518	5.18344	94.3796
5.2001	16.6195	5.2001	42.123	5.2001	42.123	5.2001	42.123	5.2001	42.123	5.2001	42.123	5.2001	42.123	5.2001	42.123	5.2001	61.7539	5.2001	53.0956	5.2001	83.6964
5.21677	19.1196	5.21677	44.6614	5.21677	44.6614	5.21677	44.6614	5.21677	44.6614	5.21677	44.6614	5.21677	44.6614	5.21677	44.6614	5.21677	71.5629	5.21677	56.5827	5.21677	82.8302
5.23344	27.8696	5.23344	55.6896	5.23344	55.6896	5.23344	55.6896	5.23344	55.6896	5.23344	55.6896	5.23344	55.6896	5.23344	55.6896	5.23344	69.4362	5.23344	72.0035	5.23344	78.5285
5.25011	20.3696	5.25011	61.36	5.25011	61.36	5.25011	61.36	5.25011	61.36	5.25011	61.36	5.25011	61.36	5.25011	61.36	5.25011	79.4068	5.25011	65.4989	5.25011	85.9967
5.26677	34.1196	5.26677	45.4647	5.26677	45.4647	5.26677	45.4647	5.26677	45.4647	5.26677	45.4647	5.26677	45.4647	5.26677	45.4647	5.26677	78.1866	5.26677	62.4696	5.26677	75.2271
5.28344	20.3696	5.28344	58.1221	5.28344	58.1221	5.28344	58.1221	5.28344	58.1221	5.28344	58.1221	5.28344	58.1221	5.28344	58.1221	5.28344	72.8131	5.28344	68.7262	5.28344	81.5645
5.30011	22.8696	5.30011	55.4436	5.30011	55.4436	5.30011	55.4436	5.30011	55.4436	5.30011	55.4436	5.30011	55.4436	5.30011	55.4436	5.30011	81.3991	5.30011	68.2123	5.30011	87.5612
5.31677	27.8696	5.31677	56.7233	5.31677	56.7233	5.31677	56.7233	5.31677	56.7233	5.31677	56.7233	5.31677	56.7233	5.31677	56.7233	5.31677	76.0672	5.31677	71.5894	5.31677	73.9574
5.33344	25.3696	5.33344	48.9572	5.33344	48.9572	5.33344	48.9572	5.33344	48.9572	5.33344	48.9572	5.33344	48.9572	5.33344	48.9572	5.33344	78.8071	5.33344	77.8208	5.33344	83.7216
5.35011	35.3696	5.35011	56.6562	5.35011	56.6562	5.35011	56.6562	5.35011	56.6562	5.35011	56.6562	5.35011	56.6562	5.35011	56.6562	5.35011	83.1251	5.35011	65.8701	5.35011	86.5957
5.36677	36.6196	5.36677	64.7498	5.36677	64.7498	5.36677	64.7498	5.36677	64.7498	5.36677	64.7498	5.36677	64.7498	5.36677	64.7498	5.36677	79.8476	5.36677	74.3034	5.36677	82.3424
5.38344	31.6196	5.38344	64.0368	5.38344	64.0368	5.38344	64.0368	5.38344	64.0368	5.38344	64.0368	5.38344	64.0368	5.38344	64.0368	5.38344	81.2124	5.38344	64.7937	5.38344	73.9616
5.40011	31.6196	5.40011	62.9744	5.40011	62.9744	5.40011	62.9744	5.40011	62.9744	5.40011	62.9744	5.40011	62.9744	5.40011	62.9744	5.40011	77.5049	5.40011	85.1696	5.40011	91.9423
5.41678	37.8696	5.41678	63.2942	5.41678	63.2942	5.41678	63.2942	5.41678	63.2942	5.41678	63.2942	5.41678	63.2942	5.41678	63.2942	5.41678	83.014	5.41678	74.5151	5.41678	84.7699
5.43344	40.3696	5.43344	57.4684	5.43344	57.4684	5.43344	57.4684	5.43344	57.4684	5.43344	57.4684	5.43344	57.4684	5.43344	57.4684	5.43344	90.1865	5.43344	82.4197	5.43344	86.6481
5.45011	39.1197	5.45011	63.1836	5.45011	63.1836	5.45011	63.1836	5.45011	63.1836	5.45011	63.1836	5.45011	63.1836	5.45011	63.1836	5.45011	87.8952	5.45011	81.0212	5.45011	92.6781
5.46678	36.6197	5.46678	63.3561	5.46678	63.3561	5.46678	63.3561	5.46678	63.3561	5.46678	63.3561	5.46678	63.3561	5.46678	63.3561	5.46678	91.5391	5.46678	80.5724	5.46678	82.5456
5.48344	41.6197	5.48344	69.522	5.48344	69.522	5.48344	69.522	5.48344	69.522	5.48344	69.522	5.48344	69.522	5.48344	69.522	5.48344	84.0966	5.48344	90.5542	5.48344	78.0416
5.50011	47.8697	5.50011	64.2989	5.50011	64.2989	5.50011	64.2989	5.50011	64.2989	5.50011	64.2989	5.50011	64.2989	5.50011	64.2989	5.50011	84.3159	5.50011	85.7657	5.50011	82.2094
5.51678	37.8697	5.51678	72.2383	5.51678	72.2383	5.51678	72.2383	5.51678	72.2383	5.51678	72.2383	5.51678	72.2383	5.51678	72.2383	5.51678	88.1211	5.51678	78.1838	5.51678	80.0629
5.53344	56.6197	5.53344	67.2264	5.53344	67.2264	5.53344	67.2264	5.53344	67.2264	5.53344	67.2264	5.53344	67.2264	5.53344	67.2264	5.53344	93.1757	5.53344	85.0132	5.53344	89.8942
5.55011	44.1197	5.55011	67.9986	5.55011	67.9986	5.55011	67.9986	5.55011	67.9986	5.55011	67.9986	5.55011	67.9986	5.55011	67.9986	5.55011	84.9619	5.55011	86.5802	5.55011	77.684
5.56678	34.1197	5.56678	73.7407	5.56678	73.7407	5.56678	73.7407	5.56678	73.7407	5.56678	73.7407	5.56678	73.7407	5.56678	73.7407	5.56678	87.1267	5.56678	86.3287	5.56678	81.7109
5.58345	36.6197	5.58345	75.0779	5.58345	75.0779	5.58345	75.0779	5.58345	75.0779	5.58345	75.0779	5.58345	75.0779	5.58345	75.0779	5.58345	82.5955	5.58345	77.0198	5.58345	82.537
5.60011	46.6197	5.60011	68.391	5.60011	68.391	5.60011	68.391	5.60011	68.391	5.60011	68.391	5.60011	68.391	5.60011	68.391	5.60011	79.8866	5.60011	77.2574	5.60011	88.0068
5.61678	27.8697	5.61678	63.0247	5.61678	63.0247	5.61678	63.0247	5.61678	63.0247	5.61678	63.0247	5.61678	63.0247	5.61678	63.0247	5.61678	91.453	5.61678	82.8688	5.61678	85.2766
5.63345	46.6197	5.63345	68.1993	5.63345	68.1993	5.63345	68.1993	5.63345	68.1993	5.63345	68.1993	5.63345	68.1993	5.63345	68.1993	5.63345	83.0584	5.63345	86.7421	5.63345	79.062
5.65011	37.8697	5.65011	72.5019	5.65011	72.5019	5.65011	72.5019	5.65011	72.5019	5.65011	72.5019	5.65011	72.5019	5.65011	72.5019	5.65011	86.2557	5.65011	86.7766	5.65011	81.7612
5.66678	44.1197	5.66678	72.3816	5.66678	72.3816	5.66678	72.3816	5.66678	72.3816	5.66678	72.3816	5.66678	72.3816	5.66678	72.3816	5.66678	75.5089	5.66678	86.6582	5.66678	84.7317
5.68345	42.8698	5.68345	79.1657	5.68345	79.1657	5.68345	79.1657	5.68345	79.1657	5.68345	79.1657	5.68345	79.1657	5.68345	79.1657	5.68345	92.0402	5.68345	90.0874	5.68345	80.0373
5.70011	40.3698	5.70011	55.8569	5.70011	55.8569	5.70011	55.8569	5.70011	55.8569	5.70011	55.8569	5.70011	55.8569	5.70011	55.8569	5.70011	85.5486	5.70011	80.4633	5.70011	84.9894
5.71678	36.6198	5.71678	75.1308	5.71678	75.1308	5.71678	75.1308	5.71678	75.1308	5.71678	75.1308	5.71678	75.1308	5.71678	75.1308	5.71678	92.0872	5.71678	82.6572	5.71678	82.9081
5.73345	47.8698	5.73345	77.1629	5.73345	77.1629	5.73345	77.1629	5.73345	77.1629	5.73345	77.1629	5.73345	77.1629	5.73345	77.1629	5.73345	84.3165	5.73345	90.151	5.73345	87.1811
5.75012	55.3698	5.75012	71.9137	5.75012	71.9137	5.75012	71.9137	5.75012	71.9137	5.75012	71.9137	5.75012	71.9137	5.75012	71.9137	5.75012	78.3436	5.75012	81.0976	5.75012	87.7832
5.76678	62.8698	5.76678	70.9471	5.76678	70.9471	5.76678	70.9471	5.76678	70.9471	5.76678	70.9471	5.76678	70.9471	5.76678	70.9471	5.76678	95.2595	5.76678	87.7403	5.76678	92.6394
5.78345	65.3698	5.78345	71.0576	5.78345	71.0576	5.78345	71.0576	5.78345	71.0576	5.78345	71.0576	5.78345	71.0576	5.78345	71.0576	5.78345	96.0036	5.78345	88.894	5.78345	81.3739
5.80012	54.1198	5.80012	76.6468	5.80012	76.6468	5.80012	76.6468	5.80012	76.6468	5.80012	76.6468	5.80012	76.6468	5.80012	76.6468	5.80012	87.1694	5.80012	89.3621	5.80012	85.7725
5.81678	60.3698	5.81678	74.0406	5.81678	74.0406	5.81678	74.0406	5.81678	74.0406	5.81678	74.0406	5.81678	74.0406	5.81678	74.0406	5.81678	82.6058	5.81678	80.7859	5.81678	82.8397
5.83345	61.6198	5.83345	74.9796	5.83345	74.9796	5.83345	74.9796	5.83345	74.9796	5.83345	74.9796	5.83345	74.9796	5.83345	74.9796	5.83345	83.2741	5.83345	75.1661	5.83345	77.9699
5.85012	55.3698	5.85012	82.1313	5.85012	82.1313	5.85012	82.1313	5.85012	82.1313	5.85012	82.1313	5.85012	82.1313	5.85012	82.1313	5.85012	88.3847	5.85012	89.2978	5.85012	79.5322
5.86678	56.6198	5.86678	85.1327	5.86678	85.1327	5.86678	85.1327	5.86678	85.1327	5.86678	85.1327	5.86678	85.1327	5.86678	85.1327	5.86678	95.2803	5.86678	88.5199	5.86678	78.6324
5.88345	47.8698	5.88345	77.6453	5.88345	77.6453	5.88345	77.6453	5.88345	77.6453	5.88345	77.6453	5.88345	77.6453	5.88345	77.6453	5.88345	85.2355	5.88345	76.8629	5.88345	83.0848
5.90012	61.6198	5.90012	94.1456	5.90012	94.1456	5.90012	94.1456	5.90012	94.1456	5.90012	94.1456	5.90012	94.1456	5.90012	94.1456	5.90012	82.8755	5.90012	79.7817	5.90012	79.2175
5.91679	59.1199	5.91679	86.3798	5.91679	86.3798	5.91679	86.3798	5.91679	86.3798	5.91679	86.3798	5.91679	86.3798	5.91679	86.3798	5.91679	92.9272	5.91679	83.4995	5.91679	83.5402
5.93345	59.1199	5.93345	77.493	5.93345	77.493	5.93345	77.493	5.93345	77.493	5.93345	77.493	5.93345	77.493	5.93345	77.493	5.93345	87.8093	5.93345	79.1362	5.93345	81.8236
5.95012	56.6199	5.95012	81.549	5.95012	81.549	5.95012	81.549	5.95012	81.549	5.95012	81.549	5.95012	81.549	5.95012	81.549	5.95012	89.147	5.95012	72.7096	5.95012	90.6947
5.96679	62.8699	5.96679	82.4532	5.96679	82.4532	5.96679	82.4532	5.96679	82.4532	5.96679	82.4532	5.96679	82.4532	5.96679	82.4532	5.96679	94.9851	5.96679	82.1519	5.96679	81.5606
5.98345	66.6199	5.98345	77.3575	5.98345	77.3575	5.98345	77.3575	5.98345	77.3575	5.98345	77.3575	5.98345	77.3575	5.98345	77.3575	5.98345	97.1278	5.98345	74.0559	5.98345	94.141
6.00012	67.8699	6.00012	80.8258	6.00012	80.8258	6.00012	80.8258	6.00012	80.8258	6.00012	80.8258	6.00012	80.8258	6.00012	80.8258	6.00012	88.5063	6.00012	82.0949	6.00012	85.3138
6.01679	69.1199	6.01679	88.0033	6.01679	88.0033	6.01679	88.0033	6.01679	88.0033	6.01679	88.0033	6.01679	88.0033	6.01679	88.0033	6.01679	96.4415	6.01679	83.9114	6.01679	82.2462
6.03345	65.3699	6.03345	89.6045	6.03345	89.6045	6.03345	89.6045	6.03345	89.6045	6.03345	89.6045	6.03345	89.6045	6.03345	89.6045	6.03345	89.8882	6.03345	79.2383	6.03345	79.8992
6.05012	76.6199	6.05012	86.3925	6.05012	86.3925	6.05012	86.3925	6.05012	86.3925	6.05012	86.3925	6.05012	86.3925	6.05012	86.3925	6.05012	94.4267	6.05012	83.1253	6.05012	96.5334
6.06679	72.8699	6.06679	78.2555	6.06679	78.2555	6.06679	78.2555	6.06679	78.2555	6.06679	78.2555	6.06679	78.2555	6.06679	78.2555	6.06679	105.935	6.06679	94.7731	6.06679	90.093
6.08346	69.1199	6.08346	78.9243	6.08346	78.9243	6.08346	78.9243	6.08346	78.9243	6.08346	78.9243	6.08346	78.9243	6.08346	78.9243	6.08346	98.6024	6.08346	79.1175	6.08346	90.7665
6.10012	71.6199	6.10012	84.5336	6.10012	84.5336	6.10012	84.5336	6.10012	84.5336	6.10012	84.5336	6.10012	84.5336	6.10012	84.5336	6.10012	95.7261	6.10012	84.1945	6.10012	95.6418
6.11679	79.1199	6.11679	82.9985	6.11679	82.9985	6.11679	82.9985	6.11679	82.9985	6.11679	82.9985	6.11679	82.9985	6.11679	82.9985	6.11679	98.2827	6.11679	84.2042	6.11679	99.037
6.13346	76.6199	6.13346	76.5579	6.13346	76.5579	6.13346	76.5579	6.13346	76.5579	6.13346	76.5579	6.13346	76.5579	6.13346	76.5579	6.13346	94.7328	6.13346	91.3923	6.13346	98.0267
6.15012	75.37	6.15012	85.2219	6.15012	85.2219	6.15012	85.2219	6.15012	85.2219	6.15012	85.2219	6.15012	85.2219	6.15012	85.2219	6.15012	97.046	6.15012	93.0313	6.15012	110.323
6.16679	76.62	6.16679	82.5737	6.16679	82.5737	6.16679	82.5737	6.16679	82.5737	6.16679	82.5737	6.16679	82.5737	6.16679	82.5737	6.16679	96.8183	6.16679	88.037	6.16679	95.7533
6.18346	81.62	6.18346	78.0665	6.18346	78.0665	6.18346	78.0665	6.18346	78.0665	6.18346	78.0665	6.18346	78.0665	6.18346	78.0665	6.18346	110.316	6.18346	84.3475	6.18346	96.9728
6.20012	79.12	6.20012	94.251	6.20012	94.251	6.20012	94.251	6.20012	94.251	6.20012	94.251	6.20012	94.251	6.20012	94.251	6.20012	101.068	6.20012	74.007	6.20012	104.095
6.21679	84.12	6.21679	94.9658	6.21679	94.9658	6.21679	94.9658	6.21679	94.9658	6.21679	94.9658	6.21679	94.9658	6.21679	94.9658	6.21679	93.201	6.21679	90.6304	6.21679	94.0212
6.23346	86.62	6.23346	89.8014	6.23346	89.8014	6.23346	89.8014	6.23346	89.8014	6.23346	89.8014	6.23346	89.8014	6.23346	89.8014	6.23346	100.644	6.23346	86.788	6.23346	95.6343
6.25013	81.62	6.25013	91.8532	6.25013	91.8532	6.25013	91.8532	6.25013	91.8532	6.25013	91.8532	6.25013	91.8532	6.25013	91.8532	6.25013	112.458	6.25013	85.9235	6.25013	93.7916
6.26679	74.12	6.26679	77.9617	6.26679	77.9617	6.26679	77.9617	6.26679	77.9617	6.26679	77.9617	6.26679	77.9617	6.26679	77.9617	6.26679	107.561	6.26679	91.2998	6.26679	105.612
6.28346	76.62	6.28346	91.0557	6.28346	91.0557	6.28346	91.0557	6.28346	91.0557	6.28346	91.0557	6.28346	91.0557	6.28346	91.0557	6.28346	103.047	6.28346	90.4141	6.28346	102.633
6.30013	74.12	6.30013	95.2714	6.30013	95.2714	6.30013	95.2714	6.30013	95.2714	6.30013	95.2714	6.30013	95.2714	6.30013	95.2714	6.30013	110.714	6.30013	85.6298	6.30013	96.9736
6.31679	82.87	6.31679	87.2907	6.31679	87.2907	6.31679	87.2907	6.31679	87.2907	6.31679	87.2907	6.31679	87.2907	6.31679	87.2907	6.31679	117.151	6.31679	98.8285	6.31679	101.772
6.33346	80.37	6.33346	96.6226	6.33346	96.6226	6.33346	96.6226	6.33346	96.6226	6.33346	96.6226	6.33346	96.6226	6.33346	96.6226	6.33346	102.971	6.33346	87.378	6.33346	100.704
6.35013	97.87	6.35013	102.661	6.35013	102.661	6.35013	102.661	6.35013	102.661	6.35013	102.661	6.35013	102.661	6.35013	102.661	6.35013	106.47	6.35013	87.8854	6.35013	101.73
6.36679	85.37	6.36679	99.1299	6.36679	99.1299	6.36679	99.1299	6.36679	99.1299	6.36679	99.1299	6.36679	99.1299	6.36679	99.1299	6.36679	106.17	6.36679	85.5028	6.36679	109.359
6.38346	85.3701	6.38346	100.154	6.38346	100.154	6.38346	100.154	6.38346	100.154	6.38346	100.154	6.38346	100.154	6.38346	100.154	6.38346	115.08	6.38346	100.641	6.38346	108.138
6.40013	91.6201	6.40013	87.9072	6.40013	87.9072	6.40013	87.9072	6.40013	87.9072	6.40013	87.9072	6.40013	87.9072	6.40013	87.9072	6.40013	115.346	6.40013	96.4849	6.40013	119.119
6.4168	91.6201	6.4168	94.5245	6.4168	94.5245	6.4168	94.5245	6.4168	94.5245	6.4168	94.5245	6.4168	94.5245	6.4168	94.5245	6.4168	119.351	6.4168	88.2269	6.4168	115.104
6.43346	84.1201	6.43346	93.9514	6.43346	93.9514	6.43346	93.9514	6.43346	93.9514	6.43346	93.9514	6.43346	93.9514	6.43346	93.9514	6.43346	112.129	6.43346	83.8243	6.43346	122.641
6.45013	75.3701	6.45013	86.3498	6.45013	86.3498	6.45013	86.3498	6.45013	86.3498	6.45013	86.3498	6.45013	86.3498	6.45013	86.3498	6.45013	120.396	6.45013	93.4681	6.45013	116.938
6.4668	66.6201	6.4668	94.9114	6.4668	94.9114	6.4668	94.9114	6.4668	94.9114	6.4668	94.9114	6.4668	94.9114	6.4668	94.9114	6.4668	122.688	6.4668	98.262	6.4668	117.94
6.48346	71.6201	6.48346	97.816	6.48346	97.816	6.48346	97.816	6.48346	97.816	6.48346	97.816	6.48346	97.816	6.48346	97.816	6.48346	129.584	6.48346	93.0237	6.48346	123.158
6.50013	82.8701	6.50013	92.1851	6.50013	92.1851	6.50013	92.1851	6.50013	92.1851	6.50013	92.1851	6.50013	92.1851	6.50013	92.1851	6.50013	121.913	6.50013	89.983	6.50013	121.265
6.5168	82.8701	6.5168	102.626	6.5168	102.626	6.5168	102.626	6.5168	102.626	6.5168	102.626	6.5168	102.626	6.5168	102.626	6.5168	124.009	6.5168	100.235	6.5168	132.143
6.53346	77.8701	6.53346	96.1293	6.53346	96.1293	6.53346	96.1293	6.53346	96.1293	6.53346	96.1293	6.53346	96.1293	6.53346	96.1293	6.53346	118.285	6.53346	101.909	6.53346	129.357
6.55013	86.6201	6.55013	90.6266	6.55013	90.6266	6.55013	90.6266	6.55013	90.6266	6.55013	90.6266	6.55013	90.6266	6.55013	90.6266	6.55013	121.793	6.55013	100.861	6.55013	125.56
6.5668	76.6201	6.5668	93.3996	6.5668	93.3996	6.5668	93.3996	6.5668	93.3996	6.5668	93.3996	6.5668	93.3996	6.5668	93.3996	6.5668	128.074	6.5668	82.6206	6.5668	131.208
6.58347	89.1201	6.58347	96.1884	6.58347	96.1884	6.58347	96.1884	6.58347	96.1884	6.58347	96.1884	6.58347	96.1884	6.58347	96.1884	6.58347	125.27	6.58347	104.649	6.58347	135.955
6.60013	86.6201	6.60013	95.2076	6.60013	95.2076	6.60013	95.2076	6.60013	95.2076	6.60013	95.2076	6.60013	95.2076	6.60013	95.2076	6.60013	128.331	6.60013	100.792	6.60013	131.64
6.6168	89.1202	6.6168	100.228	6.6168	100.228	6.6168	100.228	6.6168	100.228	6.6168	100.228	6.6168	100.228	6.6168	100.228	6.6168	124.057	6.6168	99.8032	6.6168	148.205
6.63347	79.1202	6.63347	107.401	6.63347	107.401	6.63347	107.401	6.63347	107.401	6.63347	107.401	6.63347	107.401	6.63347	107.401	6.63347	123.336	6.63347	99.0407	6.63347	141.763
6.65013	82.8702	6.65013	103.494	6.65013	103.494	6.65013	103.494	6.65013	103.494	6.65013	103.494	6.65013	103.494	6.65013	103.494	6.65013	129.843	6.65013	90.3133	6.65013	140.729
6.6668	95.3702	6.6668	97.4005	6.6668	97.4005	6.6668	97.4005	6.6668	97.4005	6.6668	97.4005	6.6668	97.4005	6.6668	97.4005	6.6668	127.696	6.6668	105.228	6.6668	153.265
6.68347	91.6202	6.68347	103.883	6.68347	103.883	6.68347	103.883	6.68347	103.883	6.68347	103.883	6.68347	103.883	6.68347	103.883	6.68347	128.763	6.68347	103.602	6.68347	143.884
6.70013	102.87	6.70013	97.3286	6.70013	97.3286	6.70013	97.3286	6.70013	97.3286	6.70013	97.3286	6.70013	97.3286	6.70013	97.3286	6.70013	122.197	6.70013	106.361	6.70013	154.103
6.7168	102.87	6.7168	97.7929	6.7168	97.7929	6.7168	97.7929	6.7168	97.7929	6.7168	97.7929	6.7168	97.7929	6.7168	97.7929	6.7168	133.493	6.7168	104.493	6.7168	163.771
6.73347	95.3702	6.73347	106.532	6.73347	106.532	6.73347	106.532	6.73347	106.532	6.73347	106.532	6.73347	106.532	6.73347	106.532	6.73347	126.074	6.73347	107.222	6.73347	163.776
6.75014	101.62	6.75014	105.113	6.75014	105.113	6.75014	105.113	6.75014	105.113	6.75014	105.113	6.75014	105.113	6.75014	105.113	6.75014	134.435	6.75014	109.578	6.75014	159.489
6.7668	101.62	6.7668	103.28	6.7668	103.28	6.7668	103.28	6.7668	103.28	6.7668	103.28	6.7668	103.28	6.7668	103.28	6.7668	140.397	6.7668	109.126	6.7668	164.953
6.78347	106.62	6.78347	102.628	6.78347	102.628	6.78347	102.628	6.78347	102.628	6.78347	102.628	6.78347	102.628	6.78347	102.628	6.78347	133.267	6.78347	106.341	6.78347	163.443
6.80014	107.87	6.80014	100.66	6.80014	100.66	6.80014	100.66	6.80014	100.66	6.80014	100.66	6.80014	100.66	6.80014	100.66	6.80014	136.835	6.80014	103.092	6.80014	165.969
6.8168	97.8702	6.8168	105.26	6.8168	105.26	6.8168	105.26	6.8168	105.26	6.8168	105.26	6.8168	105.26	6.8168	105.26	6.8168	147.79	6.8168	101.5	6.8168	166.383
6.83347	91.6202	6.83347	109.992	6.83347	109.992	6.83347	109.992	6.83347	109.992	6.83347	109.992	6.83347	109.992	6.83347	109.992	6.83347	145.938	6.83347	110.605	6.83347	172.078
6.85014	101.62	6.85014	111.065	6.85014	111.065	6.85014	111.065	6.85014	111.065	6.85014	111.065	6.85014	111.065	6.85014	111.065	6.85014	135.392	6.85014	110.123	6.85014	168.167
6.8668	106.62	6.8668	98.7312	6.8668	98.7312	6.8668	98.7312	6.8668	98.7312	6.8668	98.7312	6.8668	98.7312	6.8668	98.7312	6.8668	146.567	6.8668	107.873	6.8668	172.573
6.88347	106.62	6.88347	114.25	6.88347	114.25	6.88347	114.25	6.88347	114.25	6.88347	114.25	6.88347	114.25	6.88347	114.25	6.88347	151.012	6.88347	116.647	6.88347	1.2452
6.90014	104.12	6.90014	110.907	6.90014	110.907	6.90014	110.907	6.90014	110.907	6.90014	110.907	6.90014	110.907	6.90014	110.907	6.90014	152.243	6.90014	116.998	6.90014	2.11482
6.91681	99.1203	6.91681	110.019	6.91681	110.019	6.91681	110.019	6.91681	110.019	6.91681	110.019	6.91681	110.019	6.91681	110.019	6.91681	147.456	6.91681	119.136	6.91681	-0.872258
6.93347	101.62	6.93347	104.268	6.93347	104.268	6.93347	104.268	6.93347	104.268	6.93347	104.268	6.93347	104.268	6.93347	104.268	6.93347	152.415	6.93347	117.349	6.93347	4.68757
6.95014	111.62	6.95014	114.774	6.95014	114.774	6.95014	114.774	6.95014	114.774	6.95014	114.774	6.95014	114.774	6.95014	114.774	6.95014	142.629	6.95014	109.424	6.95014	4.62294
6.96681	101.62	6.96681	115.85	6.96681	115.85	6.96681	115.85	6.96681	115.85	6.96681	115.85	6.96681	115.85	6.96681	115.85	6.96681	148.554	6.96681	120.28	6.96681	5.65871
6.98347	105.37	6.98347	112.917	6.98347	112.917	6.98347	112.917	6.98347	112.917	6.98347	112.917	6.98347	112.917	6.98347	112.917	6.98347	153.047	6.98347	111.044	6.98347	6.54403
7.00014	109.12	7.00014	116.226	7.00014	116.226	7.00014	116.226	7.00014	116.226	7.00014	116.226	7.00014	116.226	7.00014	116.226	7.00014	147.385	7.00014	123.03	7.00014	15.0431
7.01681	115.37	7.01681	113.626	7.01681	113.626	7.01681	113.626	7.01681	113.626	7.01681	113.626	7.01681	113.626	7.01681	113.626	7.01681	151.865	7.01681	125.549	7.01681	6.93811
7.03347	111.62	7.03347	117.388	7.03347	117.388	7.03347	117.388	7.03347	117.388	7.03347	117.388	7.03347	117.388	7.03347	117.388	7.03347	154.691	7.03347	123.436	7.03347	14.0607
7.05014	119.12	7.05014	122.211	7.05014	122.211	7.05014	122.211	7.05014	122.211	7.05014	122.211	7.05014	122.211	7.05014	122.211	7.05014	158.272	7.05014	117.544	7.05014	15.1248
7.06681	117.87	7.06681	122.322	7.06681	122.322	7.06681	122.322	7.06681	122.322	7.06681	122.322	7.06681	122.322	7.06681	122.322	7.06681	159.46	7.06681	120.853	7.06681	9.48784
7.08348	120.37	7.08348	127.795	7.08348	127.795	7.08348	127.795	7.08348	127.795	7.08348	127.795	7.08348	127.795	7.08348	127.795	7.08348	158.887	7.08348	123.482	7.08348	11.0772
7.10014	115.37	7.10014	126.65	7.10014	126.65	7.10014	126.65	7.10014	126.65	7.10014	126.65	7.10014	126.65	7.10014	126.65	7.10014	160.443	7.10014	118.556	7.10014	13.3838
7.11681	106.62	7.11681	123.521	7.11681	123.521	7.11681	123.521	7.11681	123.521	7.11681	123.521	7.11681	123.521	7.11681	123.521	7.11681	171.962	7.11681	131.714	7.11681	11.178
7.13348	109.12	7.13348	125.476	7.13348	125.476	7.13348	125.476	7.13348	125.476	7.13348	125.476	7.13348	125.476	7.13348	125.476	7.13348	159.15	7.13348	126.145	7.13348	12.9781
7.15014	124.12	7.15014	122.112	7.15014	122.112	7.15014	122.112	7.15014	122.112	7.15014	122.112	7.15014	122.112	7.15014	122.112	7.15014	163.553	7.15014	131.271	7.15014	19.1409
7.16681	111.62	7.16681	127.678	7.16681	127.678	7.16681	127.678	7.16681	127.678	7.16681	127.678	7.16681	127.678	7.16681	127.678	7.16681	168.689	7.16681	131.29	7.16681	16.4479
7.18348	120.37	7.18348	113.52	7.18348	113.52	7.18348	113.52	7.18348	113.52	7.18348	113.52	7.18348	113.52	7.18348	113.52	7.18348	165.348	7.18348	134.037	7.18348	8.77232
7.20014	116.62	7.20014	120.076	7.20014	120.076	7.20014	120.076	7.20014	120.076	7.20014	120.076	7.20014	120.076	7.20014	120.076	7.20014	169.414	7.20014	136.227	7.20014	7.39771
7.21681	119.12	7.21681	130.573	7.21681	130.573	7.21681	130.573	7.21681	130.573	7.21681	130.573	7.21681	130.573	7.21681	130.573	7.21681	168.707	7.21681	135.642	7.21681	15.2664
7.23348	121.62	7.23348	124.528	7.23348	124.528	7.23348	124.528	7.23348	124.528	7.23348	124.528	7.23348	124.528	7.23348	124.528	7.23348	5.00804	7.23348	139.899	7.23348	15.2799
7.25015	127.87	7.25015	130.854	7.25015	130.854	7.25015	130.854	7.25015	130.854	7.25015	130.854	7.25015	130.854	7.25015	130.854	7.25015	3.3974	7.25015	125.625	7.25015	11.8826
7.26681	131.62	7.26681	120.793	7.26681	120.793	7.26681	120.793	7.26681	120.793	7.26681	120.793	7.26681	120.793	7.26681	120.793	7.26681	8.2519	7.26681	114.674	7.26681	10.9752
7.28348	122.87	7.28348	118.822	7.28348	118.822	7.28348	118.822	7.28348	118.822	7.28348	118.822	7.28348	118.822	7.28348	118.822	7.28348	8.0124	7.28348	139.205	7.28348	14.4512
7.30015	141.62	7.30015	131.986	7.30015	131.986	7.30015	131.986	7.30015	131.986	7.30015	131.986	7.30015	131.986	7.30015	131.986	7.30015	7.65636	7.30015	132.548	7.30015	12.2635
7.31681	125.37	7.31681	136.98	7.31681	136.98	7.31681	136.98	7.31681	136.98	7.31681	136.98	7.31681	136.98	7.31681	136.98	7.31681	6.66561	7.31681	143.7	7.31681	9.75389
7.33348	134.12	7.33348	128.729	7.33348	128.729	7.33348	128.729	7.33348	128.729	7.33348	128.729	7.33348	128.729	7.33348	128.729	7.33348	2.12033	7.33348	131.892	7.33348	15.3307
7.35015	127.87	7.35015	135.268	7.35015	135.268	7.35015	135.268	7.35015	135.268	7.35015	135.268	7.35015	135.268	7.35015	135.268	7.35015	7.22422	7.35015	138.774	7.35015	22.3026
7.36681	134.12	7.36681	140.083	7.36681	140.083	7.36681	140.083	7.36681	140.083	7.36681	140.083	7.36681	140.083	7.36681	140.083	7.36681	-0.746428	7.36681	147.374	7.36681	14.7951
7.38348	132.87	7.38348	132.515	7.38348	132.515	7.38348	132.515	7.38348	132.515	7.38348	132.515	7.38348	132.515	7.38348	132.515	7.38348	5.60164	7.38348	139.162	7.38348	15.9494
7.40015	127.87	7.40015	130.302	7.40015	130.302	7.40015	130.302	7.40015	130.302	7.40015	130.302	7.40015	130.302	7.40015	130.302	7.40015	7.99548	7.40015	141.265	7.40015	13.1251
7.41682	129.12	7.41682	134.042	7.41682	134.042	7.41682	134.042	7.41682	134.042	7.41682	134.042	7.41682	134.042	7.41682	134.042	7.41682	13.345	7.41682	146.495	7.41682	8.2023
7.43348	145.37	7.43348	132.54	7.43348	132.54	7.43348	132.54	7.43348	132.54	7.43348	132.54	7.43348	132.54	7.43348	132.54	7.43348	11.4542	7.43348	140.225	7.43348	6.76784
7.45015	135.371	7.45015	139.451	7.45015	139.451	7.45015	139.451	7.45015	139.451	7.45015	139.451	7.45015	139.451	7.45015	139.451	7.45015	8.22271	7.45015	146.543	7.45015	17.9679
7.46682	141.621	7.46682	144.146	7.46682	144.146	7.46682	144.146	7.46682	144.146	7.46682	144.146	7.46682	144.146	7.46682	144.146	7.46682	9.16964	7.46682	142.025	7.46682	10.4897
7.48348	130.371	7.48348	149.098	7.48348	149.098	7.48348	149.098	7.48348	149.098	7.48348	149.098	7.48348	149.098	7.48348	149.098	7.48348	10.2837	7.48348	149.537	7.48348	6.02389
7.50015	141.621	7.50015	127.908	7.50015	127.908	7.50015	127.908	7.50015	127.908	7.50015	127.908	7.50015	127.908	7.50015	127.908	7.50015	15.0216	7.50015	138.158	7.50015	20.7724
7.51682	134.121	7.51682	147.025	7.51682	147.025	7.51682	147.025	7.51682	147.025	7.51682	147.025	7.51682	147.025	7.51682	147.025	7.51682	14.2943	7.51682	147.204	7.51682	14.5094
7.53348	149.121	7.53348	140.043	7.53348	140.043	7.53348	140.043	7.53348	140.043	7.53348	140.043	7.53348	140.043	7.53348	140.043	7.53348	16.987	7.53348	147.684	7.53348	16.0038
7.55015	142.871	7.55015	143.925	7.55015	143.925	7.55015	143.925	7.55015	143.925	7.55015	143.925	7.55015	143.925	7.55015	143.925	7.55015	7.83977	7.55015	162.675	7.55015	19.9267
7.56682	145.371	7.56682	146.005	7.56682	146.005	7.56682	146.005	7.56682	146.005	7.56682	146.005	7.56682	146.005	7.56682	146.005	7.56682	12.7149	7.56682	149.61	7.56682	20.3428
7.58349	144.121	7.58349	148.091	7.58349	148.091	7.58349	148.091	7.58349	148.091	7.58349	148.091	7.58349	148.091	7.58349	148.091	7.58349	12.9852	7.58349	150.724	7.58349	16.8312
7.60015	154.121	7.60015	147.879	7.60015	147.879	7.60015	147.879	7.60015	147.879	7.60015	147.879	7.60015	147.879	7.60015	147.879	7.60015	16.0434	7.60015	149.531	7.60015	19.086
7.61682	156.621	7.61682	154.014	7.61682	154.014	7.61682	154.014	7.61682	154.014	7.61682	154.014	7.61682	154.014	7.61682	154.014	7.61682	10.5474	7.61682	170.665	7.61682	22.0565
7.63349	150.371	7.63349	149.156	7.63349	149.156	7.63349	149.156	7.63349	149.156	7.63349	149.156	7.63349	149.156	7.63349	149.156	7.63349	14.2437	7.63349	154.787	7.63349	13.3292
7.65015	139.121	7.65015	153.599	7.65015	153.599	7.65015	153.599	7.65015	153.599	7.65015	153.599	7.65015	153.599	7.65015	153.599	7.65015	21.5653	7.65015	163.976	7.65015	11.885
7.66682	146.621	7.66682	147.828	7.66682	147.828	7.66682	147.828	7.66682	147.828	7.66682	147.828	7.66682	147.828	7.66682	147.828	7.66682	18.4337	7.66682	163.664	7.66682	21.9377
7.68349	152.871	7.68349	155.618	7.68349	155.618	7.68349	155.618	7.68349	155.618	7.68349	155.618	7.68349	155.618	7.68349	155.618	7.68349	24.201	7.68349	167.861	7.68349	20.4774
7.70015	156.621	7.70015	149.962	7.70015	149.962	7.70015	149.962	7.70015	149.962	7.70015	149.962	7.70015	149.962	7.70015	149.962	7.70015	24.0824	7.70015	170.621	7.70015	20.6816
7.71682	166.621	7.71682	157.947	7.71682	157.947	7.71682	157.947	7.71682	157.947	7.71682	157.947	7.71682	157.947	7.71682	157.947	7.71682	21.8362	7.71682	156.275	7.71682	25.9495
7.73349	141.621	7.73349	153.56	7.73349	153.56	7.73349	153.56	7.73349	153.56	7.73349	153.56	7.73349	153.56	7.73349	153.56	7.73349	16.1251	7.73349	159.037	7.73349	16.5302
7.75016	157.871	7.75016	153.63	7.75016	153.63	7.75016	153.63	7.75016	153.63	7.75016	153.63	7.75016	153.63	7.75016	153.63	7.75016	14.7336	7.75016	162.769	7.75016	32.7382
7.76682	151.621	7.76682	151.907	7.76682	151.907	7.76682	151.907	7.76682	151.907	7.76682	151.907	7.76682	151.907	7.76682	151.907	7.76682	23.1149	7.76682	164.339	7.76682	21.2522
7.78349	149.121	7.78349	152.511	7.78349	152.511	7.78349	152.511	7.78349	152.511	7.78349	152.511	7.78349	152.511	7.78349	152.511	7.78349	10.0707	7.78349	172.174	7.78349	26.8828
7.80016	160.371	7.80016	151.489	7.80016	151.489	7.80016	151.489	7.80016	151.489	7.80016	151.489	7.80016	151.489	7.80016	151.489	7.80016	23.0709	7.80016	171.367	7.80016	28.1023
7.81682	151.621	7.81682	168.051	7.81682	168.051	7.81682	168.051	7.81682	168.051	7.81682	168.051	7.81682	168.051	7.81682	168.051	7.81682	19.0145	7.81682	170.09	7.81682	20.8475
7.83349	155.371	7.83349	152.085	7.83349	152.085	7.83349	152.085	7.83349	152.085	7.83349	152.085	7.83349	152.085	7.83349	152.085	7.83349	29.311	7.83349	170.515	7.83349	22.5876
7.85016	160.371	7.85016	156.826	7.85016	156.826	7.85016	156.826	7.85016	156.826	7.85016	156.826	7.85016	156.826	7.85016	156.826	7.85016	24.6444	7.85016	185.472	7.85016	20.6623
7.86682	162.871	7.86682	158.896	7.86682	158.896	7.86682	158.896	7.86682	158.896	7.86682	158.896	7.86682	158.896	7.86682	158.896	7.86682	27.3742	7.86682	173.506	7.86682	24.6511
7.88349	157.871	7.88349	148.129	7.88349	148.129	7.88349	148.129	7.88349	148.129	7.88349	148.129	7.88349	148.129	7.88349	148.129	7.88349	17.2082	7.88349	173.733	7.88349	21.5366
7.90016	160.371	7.90016	161.305	7.90016	161.305	7.90016	161.305	7.90016	161.305	7.90016	161.305	7.90016	161.305	7.90016	161.305	7.90016	34.8467	7.90016	171.77	7.90016	25.7167
7.91683	161.621	7.91683	161.904	7.91683	161.904	7.91683	161.904	7.91683	161.904	7.91683	161.904	7.91683	161.904	7.91683	161.904	7.91683	30.3896	7.91683	170.745	7.91683	27.8661
7.93349	174.121	7.93349	159	7.93349	159	7.93349	159	7.93349	159	7.93349	159	7.93349	159	7.93349	159	7.93349	27.5663	7.93349	3.23034	7.93349	25.067
7.95016	155.371	7.95016	153.832	7.95016	153.832	7.95016	153.832	7.95016	153.832	7.95016	153.832	7.95016	153.832	7.95016	153.832	7.95016	33.6021	7.95016	3.62422	7.95016	23.4819
7.96683	145.371	7.96683	163.418	7.96683	163.418	7.96683	163.418	7.96683	163.418	7.96683	163.418	7.96683	163.418	7.96683	163.418	7.96683	40.607	7.96683	-2.56872	7.96683	33.4985
7.98349	161.621	7.98349	165.855	7.98349	165.855	7.98349	165.855	7.98349	165.855	7.98349	165.855	7.98349	165.855	7.98349	165.855	7.98349	41.335	7.98349	14.5689	7.98349	31.6105
8.00016	162.871	8.00016	161.89	8.00016	161.89	8.00016	161.89	8.00016	161.89	8.00016	161.89	8.00016	161.89	8.00016	161.89	8.00016	43.5096	8.00016	-3.54624	8.00016	35.0641
8.01683	161.621	8.01683	155.724	8.01683	155.724	8.01683	155.724	8.01683	155.724	8.01683	155.724	8.01683	155.724	8.01683	155.724	8.01683	38.7372	8.01683	1.63724	8.01683	31.963
8.03349	150.371	8.03349	157.85	8.03349	157.85	8.03349	157.85	8.03349	157.85	8.03349	157.85	8.03349	157.85	8.03349	157.85	8.03349	33.6909	8.03349	3.00673	8.03349	37.0166
8.05016	161.621	8.05016	164.103	8.05016	164.103	8.05016	164.103	8.05016	164.103	8.05016	164.103	8.05016	164.103	8.05016	164.103	8.05016	41.3174	8.05016	5.52035	8.05016	34.3105
8.06683	160.371	8.06683	163.29	8.06683	163.29	8.06683	163.29	8.06683	163.29	8.06683	163.29	8.06683	163.29	8.06683	163.29	8.06683	42.4539	8.06683	3.39333	8.06683	32.7678
8.0835	147.871	8.0835	166.888	8.0835	166.888	8.0835	166.888	8.0835	166.888	8.0835	166.888	8.0835	166.888	8.0835	166.888	8.0835	40.263	8.0835	9.76313	8.0835	39.1215
8.10016	150.371	8.10016	165.583	8.10016	165.583	8.10016	165.583	8.10016	165.583	8.10016	165.583	8.10016	165.583	8.10016	165.583	8.10016	32.8055	8.10016	13.2594	8.10016	34.8102
8.11683	159.121	8.11683	165.588	8.11683	165.588	8.11683	165.588	8.11683	165.588	8.11683	165.588	8.11683	165.588	8.11683	165.588	8.11683	45.7342	8.11683	1.88118	8.11683	41.5998
8.1335	152.871	8.1335	167.76	8.1335	167.76	8.1335	167.76	8.1335	167.76	8.1335	167.76	8.1335	167.76	8.1335	167.76	8.1335	33.9638	8.1335	7.08223	8.1335	53.9764
8.15016	125.371	8.15016	172.867	8.15016	172.867	8.15016	172.867	8.15016	172.867	8.15016	172.867	8.15016	172.867	8.15016	172.867	8.15016	45.8556	8.15016	5.60485	8.15016	40.4796
8.16683	86.6208	8.16683	173.654	8.16683	173.654	8.16683	173.654	8.16683	173.654	8.16683	173.654	8.16683	173.654	8.16683	173.654	8.16683	40.6016	8.16683	10.8769	8.16683	40.0572
8.1835	77.8708	8.1835	163.435	8.1835	163.435	8.1835	163.435	8.1835	163.435	8.1835	163.435	8.1835	163.435	8.1835	163.435	8.1835	49.3099	8.1835	12.0437	8.1835	41.2194
8.20016	69.1208	8.20016	168.9	8.20016	168.9	8.20016	168.9	8.20016	168.9	8.20016	168.9	8.20016	168.9	8.20016	168.9	8.20016	48.703	8.20016	3.91102	8.20016	37.3956
8.21683	0.370842	8.21683	173.966	8.21683	173.966	8.21683	173.966	8.21683	173.966	8.21683	173.966	8.21683	173.966	8.21683	173.966	8.21683	34.986	8.21683	7.35504	8.21683	37.8914
8.2335	2.87085	8.2335	177.182	8.2335	177.182	8.2335	177.182	8.2335	177.182	8.2335	177.182	8.2335	177.182	8.2335	177.182	8.2335	56.7534	8.2335	11.4347	8.2335	47.1006
8.25017	5.37086	8.25017	-6.1144	8.25017	-6.1144	8.25017	-6.1144	8.25017	-6.1144	8.25017	-6.1144	8.25017	-6.1144	8.25017	-6.1144	8.25017	44.9938	8.25017	15.5621	8.25017	41.1261
8.26683	-0.879136	8.26683	0.16941	8.26683	0.16941	8.26683	0.16941	8.26683	0.16941	8.26683	0.16941	8.26683	0.16941	8.26683	0.16941	8.26683	44.3719	8.26683	16.9723	8.26683	51.9135
8.2835	-0.857253	8.2835	0.0806439	8.2835	0.0806439	8.2835	0.0806439	8.2835	0.0806439	8.2835	0.0806439	8.2835	0.0806439	8.2835	0.0806439	8.2835	47.979	8.2835	9.77163	8.2835	39.6259
8.30017	-0.857246	8.30017	0.0259441	8.30017	0.0259441	8.30017	0.0259441	8.30017	0.0259441	8.30017	0.0259441	8.30017	0.0259441	8.30017	0.0259441	8.30017	51.1161	8.30017	17.9924	8.30017	42.7538
8.31683	6.64276	8.31683	10.8496	8.31683	10.8496	8.31683	10.8496	8.31683	10.8496	8.31683	10.8496	8.31683	10.8496	8.31683	10.8496	8.31683	48.037	8.31683	16.6138	8.31683	44.194
8.3335	-3.35723	8.3335	-1.49666	8.3335	-1.49666	8.3335	-1.49666	8.3335	-1.49666	8.3335	-1.49666	8.3335	-1.49666	8.3335	-1.49666	8.3335	54.8632	8.3335	6.9864	8.3335	47.133
8.35017	1.64278	8.35017	9.06312	8.35017	9.06312	8.35017	9.06312	8.35017	9.06312	8.35017	9.06312	8.35017	9.06312	8.35017	9.06312	8.35017	44.6596	8.35017	19.2191	8.35017	46.8572
8.36683	-2.59774	8.36683	-4.22443	8.36683	-4.22443	8.36683	-4.22443	8.36683	-4.22443	8.36683	-4.22443	8.36683	-4.22443	8.36683	-4.22443	8.36683	48.1948	8.36683	15.9354	8.36683	56.6979
8.3835	-3.84774	8.3835	6.2706	8.3835	6.2706	8.3835	6.2706	8.3835	6.2706	8.3835	6.2706	8.3835	6.2706	8.3835	6.2706	8.3835	58.2546	8.3835	16.3327	8.3835	47.322
8.40017	-1.34773	8.40017	2.43009	8.40017	2.43009	8.40017	2.43009	8.40017	2.43009	8.40017	2.43009	8.40017	2.43009	8.40017	2.43009	8.40017	57.3295	8.40017	8.07306	8.40017	50.5438
8.41684	9.90228	8.41684	1.44818	8.41684	1.44818	8.41684	1.44818	8.41684	1.44818	8.41684	1.44818	8.41684	1.44818	8.41684	1.44818	8.41684	63.5064	8.41684	12.4381	8.41684	63.7261
8.4335	-7.59771	8.4335	2.79348	8.4335	2.79348	8.4335	2.79348	8.4335	2.79348	8.4335	2.79348	8.4335	2.79348	8.4335	2.79348	8.4335	57.0077	8.4335	17.3256	8.4335	57.444
8.45017	2.40229	8.45017	-4.00081	8.45017	-4.00081	8.45017	-4.00081	8.45017	-4.00081	8.45017	-4.00081	8.45017	-4.00081	8.45017	-4.00081	8.45017	64.4278	8.45017	25.3468	8.45017	56.4328
8.46684	1.1523	8.46684	1.87553	8.46684	1.87553	8.46684	1.87553	8.46684	1.87553	8.46684	1.87553	8.46684	1.87553	8.46684	1.87553	8.46684	62.0393	8.46684	10.9077	8.46684	51.7577
8.4835	-0.097693	8.4835	5.30145	8.4835	5.30145	8.4835	5.30145	8.4835	5.30145	8.4835	5.30145	8.4835	5.30145	8.4835	5.30145	8.4835	58.3373	8.4835	14.6235	8.4835	52.0362
8.50017	-0.0976858	8.50017	-4.03734	8.50017	-4.03734	8.50017	-4.03734	8.50017	-4.03734	8.50017	-4.03734	8.50017	-4.03734	8.50017	-4.03734	8.50017	68.6325	8.50017	5.99406	8.50017	60.1342
8.51684	-1.34768	8.51684	10.6978	8.51684	10.6978	8.51684	10.6978	8.51684	10.6978	8.51684	10.6978	8.51684	10.6978	8.51684	10.6978	8.51684	68.6376	8.51684	13.7313	8.51684	60.0986
8.5335	2.40233	8.5335	6.45077	8.5335	6.45077	8.5335	6.45077	8.5335	6.45077	8.5335	6.45077	8.5335	6.45077	8.5335	6.45077	8.5335	71.3409	8.5335	17.3123	8.5335	55.6869
8.55017	12.4023	8.55017	18.4657	8.55017	18.4657	8.55017	18.4657	8.55017	18.4657	8.55017	18.4657	8.55017	18.4657	8.55017	18.4657	8.55017	74.1759	8.55017	25.244	8.55017	59.722
8.56684	14.9023	8.56684	20.2099	8.56684	20.2099	8.56684	20.2099	8.56684	20.2099	8.56684	20.2099	8.56684	20.2099	8.56684	20.2099	8.56684	67.9633	8.56684	28.0058	8.56684	63.6076
8.58351	9.90235	8.58351	17.0984	8.58351	17.0984	8.58351	17.0984	8.58351	17.0984	8.58351	17.0984	8.58351	17.0984	8.58351	17.0984	8.58351	78.0998	8.58351	21.5758	8.58351	68.8047
8.60017	7.40236	8.60017	18.0643	8.60017	18.0643	8.60017	18.0643	8.60017	18.0643	8.60017	18.0643	8.60017	18.0643	8.60017	18.0643	8.60017	77.6453	8.60017	25.1081	8.60017	62.1184
8.61684	14.9024	8.61684	5.68331	8.61684	5.68331	8.61684	5.68331	8.61684	5.68331	8.61684	5.68331	8.61684	5.68331	8.61684	5.68331	8.61684	80.5285	8.61684	27.2107	8.61684	70.4479
8.63351	8.65237	8.63351	21.254	8.63351	21.254	8.63351	21.254	8.63351	21.254	8.63351	21.254	8.63351	21.254	8.63351	21.254	8.63351	82.8542	8.63351	24.8912	8.63351	68.6097
8.65017	11.1524	8.65017	30.1233	8.65017	30.1233	8.65017	30.1233	8.65017	30.1233	8.65017	30.1233	8.65017	30.1233	8.65017	30.1233	8.65017	81.4164	8.65017	19.4938	8.65017	68.7697
8.66684	12.4024	8.66684	7.21136	8.66684	7.21136	8.66684	7.21136	8.66684	7.21136	8.66684	7.21136	8.66684	7.21136	8.66684	7.21136	8.66684	85.072	8.66684	18.1773	8.66684	66.3811
8.68351	13.6524	8.68351	19.231	8.68351	19.231	8.68351	19.231	8.68351	19.231	8.68351	19.231	8.68351	19.231	8.68351	19.231	8.68351	78.4748	8.68351	19.4024	8.68351	68.7194
8.70017	16.1524	8.70017	16.2268	8.70017	16.2268	8.70017	16.2268	8.70017	16.2268	8.70017	16.2268	8.70017	16.2268	8.70017	16.2268	8.70017	77.3624	8.70017	29.2672	8.70017	75.076
8.71684	11.1524	8.71684	21.4974	8.71684	21.4974	8.71684	21.4974	8.71684	21.4974	8.71684	21.4974	8.71684	21.4974	8.71684	21.4974	8.71684	73.6783	8.71684	25.3322	8.71684	73.3545
8.73351	11.1524	8.73351	11.4985	8.73351	11.4985	8.73351	11.4985	8.73351	11.4985	8.73351	11.4985	8.73351	11.4985	8.73351	11.4985	8.73351	81.147	8.73351	15.8948	8.73351	86.2167
8.75018	22.4024	8.75018	13.6579	8.75018	13.6579	8.75018	13.6579	8.75018	13.6579	8.75018	13.6579	8.75018	13.6579	8.75018	13.6579	8.75018	84.923	8.75018	14.9922	8.75018	73.4602
8.76684	18.6524	8.76684	9.99475	8.76684	9.99475	8.76684	9.99475	8.76684	9.99475	8.76684	9.99475	8.76684	9.99475	8.76684	9.99475	8.76684	82.6724	8.76684	33.3525	8.76684	80.3492
8.78351	21.1524	8.78351	15.055	8.78351	15.055	8.78351	15.055	8.78351	15.055	8.78351	15.055	8.78351	15.055	8.78351	15.055	8.78351	84.2525	8.78351	29.6716	8.78351	77.477
8.80018	22.4024	8.80018	5.86732	8.80018	5.86732	8.80018	5.86732	8.80018	5.86732	8.80018	5.86732	8.80018	5.86732	8.80018	5.86732	8.80018	79.7407	8.80018	15.3102	8.80018	81.4906
8.81684	18.6525	8.81684	3.94651	8.81684	3.94651	8.81684	3.94651	8.81684	3.94651	8.81684	3.94651	8.81684	3.94651	8.81684	3.94651	8.81684	77.662	8.81684	28.4436	8.81684	86.6909
8.83351	14.9025	8.83351	12.9236	8.83351	12.9236	8.83351	12.9236	8.83351	12.9236	8.83351	12.9236	8.83351	12.9236	8.83351	12.9236	8.83351	78.6112	8.83351	28.3623	8.83351	62.1
8.85018	26.1525	8.85018	16.3529	8.85018	16.3529	8.85018	16.3529	8.85018	16.3529	8.85018	16.3529	8.85018	16.3529	8.85018	16.3529	8.85018	85.0314	8.85018	25.8693	8.85018	79.1403
8.86684	33.6525	8.86684	16.0952	8.86684	16.0952	8.86684	16.0952	8.86684	16.0952	8.86684	16.0952	8.86684	16.0952	8.86684	16.0952	8.86684	93.3754	8.86684	20.3863	8.86684	78.7407
8.88351	29.9025	8.88351	6.94436	8.88351	6.94436	8.88351	6.94436	8.88351	6.94436	8.88351	6.94436	8.88351	6.94436	8.88351	6.94436	8.88351	84.3572	8.88351	28.9047	8.88351	82.7229
8.90018	29.9025	8.90018	15.725	8.90018	15.725	8.90018	15.725	8.90018	15.725	8.90018	15.725	8.90018	15.725	8.90018	15.725	8.90018	99.2907	8.90018	29.4925	8.90018	91.2104
8.91685	27.4025	8.91685	26.687	8.91685	26.687	8.91685	26.687	8.91685	26.687	8.91685	26.687	8.91685	26.687	8.91685	26.687	8.91685	92.6535	8.91685	23.0485	8.91685	88.6259
8.93351	29.9025	8.93351	22.2807	8.93351	22.2807	8.93351	22.2807	8.93351	22.2807	8.93351	22.2807	8.93351	22.2807	8.93351	22.2807	8.93351	76.9955	8.93351	29.6388	8.93351	73.3204
8.95018	23.6525	8.95018	22.3334	8.95018	22.3334	8.95018	22.3334	8.95018	22.3334	8.95018	22.3334	8.95018	22.3334	8.95018	22.3334	8.95018	96.2096	8.95018	36.3796	8.95018	78.0721
8.96685	31.1525	8.96685	23.2794	8.96685	23.2794	8.96685	23.2794	8.96685	23.2794	8.96685	23.2794	8.96685	23.2794	8.96685	23.2794	8.96685	92.7047	8.96685	37.8242	8.96685	89.4765
8.98351	28.6525	8.98351	18.6426	8.98351	18.6426	8.98351	18.6426	8.98351	18.6426	8.98351	18.6426	8.98351	18.6426	8.98351	18.6426	8.98351	89.096	8.98351	27.2386	8.98351	77.9138
9.00018	29.9025	9.00018	25.6728	9.00018	25.6728	9.00018	25.6728	9.00018	25.6728	9.00018	25.6728	9.00018	25.6728	9.00018	25.6728	9.00018	87.8464	9.00018	44.0445	9.00018	76.9946
9.01685	17.4025	9.01685	24.6338	9.01685	24.6338	9.01685	24.6338	9.01685	24.6338	9.01685	24.6338	9.01685	24.6338	9.01685	24.6338	9.01685	102.972	9.01685	42.0281	9.01685	86.244
9.03351	8.65254	9.03351	26.7683	9.03351	26.7683	9.03351	26.7683	9.03351	26.7683	9.03351	26.7683	9.03351	26.7683	9.03351	26.7683	9.03351	91.8162	9.03351	46.4648	9.03351	87.8055
9.05018	19.9025	9.05018	25.6889	9.05018	25.6889	9.05018	25.6889	9.05018	25.6889	9.05018	25.6889	9.05018	25.6889	9.05018	25.6889	9.05018	91.4642	9.05018	39.0304	9.05018	95.3544
9.06685	18.6526	9.06685	26.9108	9.06685	26.9108	9.06685	26.9108	9.06685	26.9108	9.06685	26.9108	9.06685	26.9108	9.06685	26.9108	9.06685	97.2674	9.06685	38.4239	9.06685	91.7776
9.08352	21.1526	9.08352	30.4595	9.08352	30.4595	9.08352	30.4595	9.08352	30.4595	9.08352	30.4595	9.08352	30.4595	9.08352	30.4595	9.08352	97.9682	9.08352	35.5584	9.08352	86.0373
9.10018	24.9026	9.10018	17.7971	9.10018	17.7971	9.10018	17.7971	9.10018	17.7971	9.10018	17.7971	9.10018	17.7971	9.10018	17.7971	9.10018	96.7134	9.10018	41.7978	9.10018	91.9595
9.11685	22.4026	9.11685	17.4941	9.11685	17.4941	9.11685	17.4941	9.11685	17.4941	9.11685	17.4941	9.11685	17.4941	9.11685	17.4941	9.11685	107.759	9.11685	37.4901	9.11685	85.3997
9.13352	28.6526	9.13352	25.7357	9.13352	25.7357	9.13352	25.7357	9.13352	25.7357	9.13352	25.7357	9.13352	25.7357	9.13352	25.7357	9.13352	107.718	9.13352	37.4307	9.13352	78.9839
9.15018	31.1526	9.15018	24.7758	9.15018	24.7758	9.15018	24.7758	9.15018	24.7758	9.15018	24.7758	9.15018	24.7758	9.15018	24.7758	9.15018	99.5137	9.15018	41.7882	9.15018	82.8155
9.16685	31.1526	9.16685	32.3994	9.16685	32.3994	9.16685	32.3994	9.16685	32.3994	9.16685	32.3994	9.16685	32.3994	9.16685	32.3994	9.16685	108.502	9.16685	41.006	9.16685	90.2512
9.18352	32.4026	9.18352	29.264	9.18352	29.264	9.18352	29.264	9.18352	29.264	9.18352	29.264	9.18352	29.264	9.18352	29.264	9.18352	90.0504	9.18352	45.4873	9.18352	80.8631
9.20018	26.1526	9.20018	35.0772	9.20018	35.0772	9.20018	35.0772	9.20018	35.0772	9.20018	35.0772	9.20018	35.0772	9.20018	35.0772	9.20018	101.285	9.20018	44.0316	9.20018	89.8116
9.21685	28.6526	9.21685	29.2852	9.21685	29.2852	9.21685	29.2852	9.21685	29.2852	9.21685	29.2852	9.21685	29.2852	9.21685	29.2852	9.21685	90.1495	9.21685	38.3594	9.21685	76.2823
9.23352	29.9026	9.23352	30.0936	9.23352	30.0936	9.23352	30.0936	9.23352	30.0936	9.23352	30.0936	9.23352	30.0936	9.23352	30.0936	9.23352	88.7101	9.23352	45.0228	9.23352	99.2413
9.25019	44.9026	9.25019	34.7235	9.25019	34.7235	9.25019	34.7235	9.25019	34.7235	9.25019	34.7235	9.25019	34.7235	9.25019	34.7235	9.25019	95.2141	9.25019	48.7114	9.25019	86.5562
9.26685	39.9026	9.26685	40.8371	9.26685	40.8371	9.26685	40.8371	9.26685	40.8371	9.26685	40.8371	9.26685	40.8371	9.26685	40.8371	9.26685	94.5777	9.26685	48.5351	9.26685	87.6066
9.28352	38.6526	9.28352	30.3508	9.28352	30.3508	9.28352	30.3508	9.28352	30.3508	9.28352	30.3508	9.28352	30.3508	9.28352	30.3508	9.28352	102.036	9.28352	51.825	9.28352	96.3512
9.30019	46.1527	9.30019	47.2856	9.30019	47.2856	9.30019	47.2856	9.30019	47.2856	9.30019	47.2856	9.30019	47.2856	9.30019	47.2856	9.30019	94.0736	9.30019	60.548	9.30019	100.11
9.31685	31.1527	9.31685	36.6003	9.31685	36.6003	9.31685	36.6003	9.31685	36.6003	9.31685	36.6003	9.31685	36.6003	9.31685	36.6003	9.31685	100.291	9.31685	52.3186	9.31685	82.1983
9.33352	34.9027	9.33352	37.336	9.33352	37.336	9.33352	37.336	9.33352	37.336	9.33352	37.336	9.33352	37.336	9.33352	37.336	9.33352	110.404	9.33352	42.7005	9.33352	71.698
9.35019	37.4027	9.35019	40.5113	9.35019	40.5113	9.35019	40.5113	9.35019	40.5113	9.35019	40.5113	9.35019	40.5113	9.35019	40.5113	9.35019	102.174	9.35019	56.8528	9.35019	81.8621
9.36685	37.4027	9.36685	36.4029	9.36685	36.4029	9.36685	36.4029	9.36685	36.4029	9.36685	36.4029	9.36685	36.4029	9.36685	36.4029	9.36685	91.3477	9.36685	51.5915	9.36685	85.4457
9.38352	51.1527	9.38352	36.4808	9.38352	36.4808	9.38352	36.4808	9.38352	36.4808	9.38352	36.4808	9.38352	36.4808	9.38352	36.4808	9.38352	111	9.38352	56.6625	9.38352	86.0793
9.40019	43.6527	9.40019	41.8899	9.40019	41.8899	9.40019	41.8899	9.40019	41.8899	9.40019	41.8899	9.40019	41.8899	9.40019	41.8899	9.40019	112.607	9.40019	52.5993	9.40019	81.6405
9.41685	39.9027	9.41685	41.2951	9.41685	41.2951	9.41685	41.2951	9.41685	41.2951	9.41685	41.2951	9.41685	41.2951	9.41685	41.2951	9.41685	102.116	9.41685	48.7399	9.41685	83.1222
9.43352	48.6527	9.43352	27.8852	9.43352	27.8852	9.43352	27.8852	9.43352	27.8852	9.43352	27.8852	9.43352	27.8852	9.43352	27.8852	9.43352	113.3	9.43352	58.7043	9.43352	80.2579
9.45019	34.9027	9.45019	44.7288	9.45019	44.7288	9.45019	44.7288	9.45019	44.7288	9.45019	44.7288	9.45019	44.7288	9.45019	44.7288	9.45019	107.819	9.45019	58.4585	9.45019	78.3531
9.46686	49.9027	9.46686	42.32	9.46686	42.32	9.46686	42.32	9.46686	42.32	9.46686	42.32	9.46686	42.32	9.46686	42.32	9.46686	121.463	9.46686	60.6254	9.46686	83.9622
9.48352	49.9027	9.48352	40.9324	9.48352	40.9324	9.48352	40.9324	9.48352	40.9324	9.48352	40.9324	9.48352	40.9324	9.48352	40.9324	9.48352	115.087	9.48352	46.2471	9.48352	96.9133
9.50019	42.4027	9.50019	45.6261	9.50019	45.6261	9.50019	45.6261	9.50019	45.6261	9.50019	45.6261	9.50019	45.6261	9.50019	45.6261	9.50019	113.759	9.50019	56.7729	9.50019	85.7865
9.51686	39.9028	9.51686	41.7619	9.51686	41.7619	9.51686	41.7619	9.51686	41.7619	9.51686	41.7619	9.51686	41.7619	9.51686	41.7619	9.51686	128.491	9.51686	59.1215	9.51686	87.5678
9.53352	36.1528	9.53352	56.9183	9.53352	56.9183	9.53352	56.9183	9.53352	56.9183	9.53352	56.9183	9.53352	56.9183	9.53352	56.9183	9.53352	115.129	9.53352	59.2249	9.53352	83.3799
9.55019	48.6528	9.55019	48.5164	9.55019	48.5164	9.55019	48.5164	9.55019	48.5164	9.55019	48.5164	9.55019	48.5164	9.55019	48.5164	9.55019	123.129	9.55019	52.7978	9.55019	83.922
9.56686	48.6528	9.56686	31.351	9.56686	31.351	9.56686	31.351	9.56686	31.351	9.56686	31.351	9.56686	31.351	9.56686	31.351	9.56686	115.709	9.56686	58.3242	9.56686	85.053
9.58352	46.1528	9.58352	38.4541	9.58352	38.4541	9.58352	38.4541	9.58352	38.4541	9.58352	38.4541	9.58352	38.4541	9.58352	38.4541	9.58352	112.662	9.58352	67.8907	9.58352	90.8522
9.60019	38.6528	9.60019	49.1056	9.60019	49.1056	9.60019	49.1056	9.60019	49.1056	9.60019	49.1056	9.60019	49.1056	9.60019	49.1056	9.60019	121.776	9.60019	60.9617	9.60019	83.4837
9.61686	49.9028	9.61686	47.9431	9.61686	47.9431	9.61686	47.9431	9.61686	47.9431	9.61686	47.9431	9.61686	47.9431	9.61686	47.9431	9.61686	121.887	9.61686	68.6785	9.61686	88.4462
9.63353	49.9028	9.63353	56.1538	9.63353	56.1538	9.63353	56.1538	9.63353	56.1538	9.63353	56.1538	9.63353	56.1538	9.63353	56.1538	9.63353	113.148	9.63353	69.1577	9.63353	91.6277
9.65019	51.1528	9.65019	45.2128	9.65019	45.2128	9.65019	45.2128	9.65019	45.2128	9.65019	45.2128	9.65019	45.2128	9.65019	45.2128	9.65019	122.407	9.65019	66.8492	9.65019	92.9495
9.66686	46.1528	9.66686	42.8956	9.66686	42.8956	9.66686	42.8956	9.66686	42.8956	9.66686	42.8956	9.66686	42.8956	9.66686	42.8956	9.66686	125.787	9.66686	65.4662	9.66686	93.6753
9.68353	37.4028	9.68353	50.9891	9.68353	50.9891	9.68353	50.9891	9.68353	50.9891	9.68353	50.9891	9.68353	50.9891	9.68353	50.9891	9.68353	127.743	9.68353	75.5236	9.68353	98.471
9.70019	52.4028	9.70019	51.4091	9.70019	51.4091	9.70019	51.4091	9.70019	51.4091	9.70019	51.4091	9.70019	51.4091	9.70019	51.4091	9.70019	117.646	9.70019	69.563	9.70019	95.164
9.71686	56.1528	9.71686	50.9169	9.71686	50.9169	9.71686	50.9169	9.71686	50.9169	9.71686	50.9169	9.71686	50.9169	9.71686	50.9169	9.71686	113.691	9.71686	77.8691	9.71686	93.5762
9.73353	59.9028	9.73353	57.9015	9.73353	57.9015	9.73353	57.9015	9.73353	57.9015	9.73353	57.9015	9.73353	57.9015	9.73353	57.9015	9.73353	120.632	9.73353	74.3511	9.73353	99.3312
9.7502	44.9029	9.7502	52.2176	9.7502	52.2176	9.7502	52.2176	9.7502	52.2176	9.7502	52.2176	9.7502	52.2176	9.7502	52.2176	9.7502	120.298	9.7502	74.9599	9.7502	99.6003
9.76686	53.6529	9.76686	56.0053	9.76686	56.0053	9.76686	56.0053	9.76686	56.0053	9.76686	56.0053	9.76686	56.0053	9.76686	56.0053	9.76686	130.279	9.76686	67.2454	9.76686	93.441
9.78353	61.1529	9.78353	58.7626	9.78353	58.7626	9.78353	58.7626	9.78353	58.7626	9.78353	58.7626	9.78353	58.7626	9.78353	58.7626	9.78353	119.13	9.78353	68.17	9.78353	97.8555
9.8002	59.9029	9.8002	59.0692	9.8002	59.0692	9.8002	59.0692	9.8002	59.0692	9.8002	59.0692	9.8002	59.0692	9.8002	59.0692	9.8002	116.966	9.8002	80.0731	9.8002	93.4174
9.81686	61.1529	9.81686	63.5907	9.81686	63.5907	9.81686	63.5907	9.81686	63.5907	9.81686	63.5907	9.81686	63.5907	9.81686	63.5907	9.81686	135.382	9.81686	83.8307	9.81686	99.2602
9.83353	68.6529	9.83353	57.8543	9.83353	57.8543	9.83353	57.8543	9.83353	57.8543	9.83353	57.8543	9.83353	57.8543	9.83353	57.8543	9.83353	115.339	9.83353	78.3725	9.83353	102.899
9.8502	72.4029	9.8502	56.2343	9.8502	56.2343	9.8502	56.2343	9.8502	56.2343	9.8502	56.2343	9.8502	56.2343	9.8502	56.2343	9.8502	129.776	9.8502	80.1664	9.8502	101.174
9.86686	64.9029	9.86686	66.0998	9.86686	66.0998	9.86686	66.0998	9.86686	66.0998	9.86686	66.0998	9.86686	66.0998	9.86686	66.0998	9.86686	120.307	9.86686	81.8509	9.86686	100.69
9.88353	64.9029	9.88353	57.779	9.88353	57.779	9.88353	57.779	9.88353	57.779	9.88353	57.779	9.88353	57.779	9.88353	57.779	9.88353	121.249	9.88353	80.2244	9.88353	87.4189
9.9002	63.6529	9.9002	51.8409	9.9002	51.8409	9.9002	51.8409	9.9002	51.8409	9.9002	51.8409	9.9002	51.8409	9.9002	51.8409	9.9002	118.287	9.9002	94.2865	9.9002	107.452
9.91687	58.6529	9.91687	58.7054	9.91687	58.7054	9.91687	58.7054	9.91687	58.7054	9.91687	58.7054	9.91687	58.7054	9.91687	58.7054	9.91687	130.938	9.91687	81.2968	9.91687	95.0009
9.93353	62.4029	9.93353	65.9721	9.93353	65.9721	9.93353	65.9721	9.93353	65.9721	9.93353	65.9721	9.93353	65.9721	9.93353	65.9721	9.93353	123.443	9.93353	80.5282	9.93353	95.4799
9.9502	64.9029	9.9502	68.8655	9.9502	68.8655	9.9502	68.8655	9.9502	68.8655	9.9502	68.8655	9.9502	68.8655	9.9502	68.8655	9.9502	129.218	9.9502	91.0791	9.9502	98.9653
9.96687	78.6529	9.96687	54.436	9.96687	54.436	9.96687	54.436	9.96687	54.436	9.96687	54.436	9.96687	54.436	9.96687	54.436	9.96687	128.712	9.96687	83.1543	9.96687	95.3565
9.98353	62.403	9.98353	66.1071	9.98353	66.1071	9.98353	66.1071	9.98353	66.1071	9.98353	66.1071	9.98353	66.1071	9.98353	66.1071	9.98353	129.904	9.98353	83.4001	9.98353	101.547
10.0002	72.403	10.0002	57.0511	10.0002	57.0511	10.0002	57.0511	10.0002	57.0511	10.0002	57.0511	10.0002	57.0511	10.0002	57.0511	10.0002	121.426	10.0002	77.5631	10.0002	101.45
10.0169	71.153	10.0169	60.1923	10.0169	60.1923	10.0169	60.1923	10.0169	60.1923	10.0169	60.1923	10.0169	60.1923	10.0169	60.1923	10.0169	132.811	10.0169	84.0982	10.0169	97.3968
10.0335	74.903	10.0335	71.8018	10.0335	71.8018	10.0335	71.8018	10.0335	71.8018	10.0335	71.8018	10.0335	71.8018	10.0335	71.8018	10.0335	143.149	10.0335	78.2516	10.0335	92.5424
10.0502	78.653	10.0502	69.5545	10.0502	69.5545	10.0502	69.5545	10.0502	69.5545	10.0502	69.5545	10.0502	69.5545	10.0502	69.5545	10.0502	142.135	10.0502	86.1181	10.0502	98.4579
10.0669	78.653	10.0669	69.1572	10.0669	69.1572	10.0669	69.1572	10.0669	69.1572	10.0669	69.1572	10.0669	69.1572	10.0669	69.1572	10.0669	144.124	10.0669	89.7581	10.0669	102.37
10.0835	89.903	10.0835	64.4925	10.0835	64.4925	10.0835	64.4925	10.0835	64.4925	10.0835	64.4925	10.0835	64.4925	10.0835	64.4925	10.0835	138.51	10.0835	86.5125	10.0835	94.385
10.1002	83.653	10.1002	70.5168	10.1002	70.5168	10.1002	70.5168	10.1002	70.5168	10.1002	70.5168	10.1002	70.5168	10.1002	70.5168	10.1002	140.748	10.1002	83.6518	10.1002	106.994
10.1169	81.153	10.1169	75.9088	10.1169	75.9088	10.1169	75.9088	10.1169	75.9088	10.1169	75.9088	10.1169	75.9088	10.1169	75.9088	10.1169	146.915	10.1169	82.8496	10.1169	103.247
10.1335	83.653	10.1335	76.2212	10.1335	76.2212	10.1335	76.2212	10.1335	76.2212	10.1335	76.2212	10.1335	76.2212	10.1335	76.2212	10.1335	148.501	10.1335	85.5003	10.1335	92.6704
10.1502	99.903	10.1502	71.4831	10.1502	71.4831	10.1502	71.4831	10.1502	71.4831	10.1502	71.4831	10.1502	71.4831	10.1502	71.4831	10.1502	141.774	10.1502	84.8922	10.1502	96.9771
10.1669	89.903	10.1669	67.6062	10.1669	67.6062	10.1669	67.6062	10.1669	67.6062	10.1669	67.6062	10.1669	67.6062	10.1669	67.6062	10.1669	142.833	10.1669	85.7815	10.1669	93.7965
10.1835	99.903	10.1835	80.4343	10.1835	80.4343	10.1835	80.4343	10.1835	80.4343	10.1835	80.4343	10.1835	80.4343	10.1835	80.4343	10.1835	147.165	10.1835	83.1895	10.1835	100.906
10.2002	102.403	10.2002	81.8463	10.2002	81.8463	10.2002	81.8463	10.2002	81.8463	10.2002	81.8463	10.2002	81.8463	10.2002	81.8463	10.2002	152.429	10.2002	83.1451	10.2002	109.209
10.2169	91.1531	10.2169	83.622	10.2169	83.622	10.2169	83.622	10.2169	83.622	10.2169	83.622	10.2169	83.622	10.2169	83.622	10.2169	148.329	10.2169	87.6204	10.2169	107.354
10.2335	83.6531	10.2335	84.981	10.2335	84.981	10.2335	84.981	10.2335	84.981	10.2335	84.981	10.2335	84.981	10.2335	84.981	10.2335	145.675	10.2335	82.9162	10.2335	112.331
10.2502	92.4031	10.2502	75.3378	10.2502	75.3378	10.2502	75.3378	10.2502	75.3378	10.2502	75.3378	10.2502	75.3378	10.2502	75.3378	10.2502	155.798	10.2502	69.7076	10.2502	107.508
10.2669	89.9031	10.2669	72.6535	10.2669	72.6535	10.2669	72.6535	10.2669	72.6535	10.2669	72.6535	10.2669	72.6535	10.2669	72.6535	10.2669	154.255	10.2669	88.713	10.2669	108.491
10.2835	87.4031	10.2835	83.3135	10.2835	83.3135	10.2835	83.3135	10.2835	83.3135	10.2835	83.3135	10.2835	83.3135	10.2835	83.3135	10.2835	152.104	10.2835	78.4858	10.2835	109.052
10.3002	96.1531	10.3002	82.7151	10.3002	82.7151	10.3002	82.7151	10.3002	82.7151	10.3002	82.7151	10.3002	82.7151	10.3002	82.7151	10.3002	154.928	10.3002	92.7422	10.3002	111.349
10.3169	83.6531	10.3169	71.4449	10.3169	71.4449	10.3169	71.4449	10.3169	71.4449	10.3169	71.4449	10.3169	71.4449	10.3169	71.4449	10.3169	149.049	10.3169	83.6432	10.3169	120.848
10.3335	91.1531	10.3335	77.4678	10.3335	77.4678	10.3335	77.4678	10.3335	77.4678	10.3335	77.4678	10.3335	77.4678	10.3335	77.4678	10.3335	155.287	10.3335	86.0125	10.3335	112.923
10.3502	88.6531	10.3502	85.439	10.3502	85.439	10.3502	85.439	10.3502	85.439	10.3502	85.439	10.3502	85.439	10.3502	85.439	10.3502	159.12	10.3502	92.9438	10.3502	113.688
10.3669	87.4031	10.3669	82.746	10.3669	82.746	10.3669	82.746	10.3669	82.746	10.3669	82.746	10.3669	82.746	10.3669	82.746	10.3669	162.35	10.3669	91.3688	10.3669	115.719
10.3835	94.9031	10.3835	79.5149	10.3835	79.5149	10.3835	79.5149	10.3835	79.5149	10.3835	79.5149	10.3835	79.5149	10.3835	79.5149	10.3835	158.149	10.3835	95.3009	10.3835	115.268
10.4002	94.9031	10.4002	83.5092	10.4002	83.5092	10.4002	83.5092	10.4002	83.5092	10.4002	83.5092	10.4002	83.5092	10.4002	83.5092	10.4002	169.595	10.4002	87.2206	10.4002	119.068
10.4169	89.9031	10.4169	82.796	10.4169	82.796	10.4169	82.796	10.4169	82.796	10.4169	82.796	10.4169	82.796	10.4169	82.796	10.4169	155.725	10.4169	88.3828	10.4169	119.798
10.4335	92.4031	10.4335	78.4567	10.4335	78.4567	10.4335	78.4567	10.4335	78.4567	10.4335	78.4567	10.4335	78.4567	10.4335	78.4567	10.4335	162.449	10.4335	89.5534	10.4335	124.181
10.4502	88.6532	10.4502	82.0652	10.4502	82.0652	10.4502	82.0652	10.4502	82.0652	10.4502	82.0652	10.4502	82.0652	10.4502	82.0652	10.4502	159.458	10.4502	94.9102	10.4502	120.376
10.4669	87.4032	10.4669	84.8027	10.4669	84.8027	10.4669	84.8027	10.4669	84.8027	10.4669	84.8027	10.4669	84.8027	10.4669	84.8027	10.4669	165.712	10.4669	88.2885	10.4669	123.028
10.4835	96.1532	10.4835	76.8998	10.4835	76.8998	10.4835	76.8998	10.4835	76.8998	10.4835	76.8998	10.4835	76.8998	10.4835	76.8998	10.4835	162.472	10.4835	95.2636	10.4835	125.426
10.5002	98.6532	10.5002	86.9009	10.5002	86.9009	10.5002	86.9009	10.5002	86.9009	10.5002	86.9009	10.5002	86.9009	10.5002	86.9009	10.5002	163.688	10.5002	96.9801	10.5002	119.522
10.5169	93.6532	10.5169	81.9253	10.5169	81.9253	10.5169	81.9253	10.5169	81.9253	10.5169	81.9253	10.5169	81.9253	10.5169	81.9253	10.5169	164.184	10.5169	102.527	10.5169	110.876
10.5335	93.6532	10.5335	84.6525	10.5335	84.6525	10.5335	84.6525	10.5335	84.6525	10.5335	84.6525	10.5335	84.6525	10.5335	84.6525	10.5335	170.948	10.5335	93.964	10.5335	127.552
10.5502	91.1532	10.5502	89.7961	10.5502	89.7961	10.5502	89.7961	10.5502	89.7961	10.5502	89.7961	10.5502	89.7961	10.5502	89.7961	10.5502	173.384	10.5502	104.645	10.5502	126.696
10.5669	97.4032	10.5669	81.5344	10.5669	81.5344	10.5669	81.5344	10.5669	81.5344	10.5669	81.5344	10.5669	81.5344	10.5669	81.5344	10.5669	179.157	10.5669	99.1381	10.5669	121.234
10.5835	101.153	10.5835	81.2736	10.5835	81.2736	10.5835	81.2736	10.5835	81.2736	10.5835	81.2736	10.5835	81.2736	10.5835	81.2736	10.5835	163.387	10.5835	97.8755	10.5835	126.023
10.6002	97.4032	10.6002	92.1631	10.6002	92.1631	10.6002	92.1631	10.6002	92.1631	10.6002	92.1631	10.6002	92.1631	10.6002	92.1631	10.6002	167.438	10.6002	96.8675	10.6002	119.559
10.6169	103.653	10.6169	84.079	10.6169	84.079	10.6169	84.079	10.6169	84.079	10.6169	84.079	10.6169	84.079	10.6169	84.079	10.6169	169.976	10.6169	107.297	10.6169	124.001
10.6335	102.403	10.6335	82.8291	10.6335	82.8291	10.6335	82.8291	10.6335	82.8291	10.6335	82.8291	10.6335	82.8291	10.6335	82.8291	10.6335	175.887	10.6335	99.6891	10.6335	124.008
10.6502	97.4032	10.6502	83.8754	10.6502	83.8754	10.6502	83.8754	10.6502	83.8754	10.6502	83.8754	10.6502	83.8754	10.6502	83.8754	10.6502	171.484	10.6502	99.9721	10.6502	133.111
10.6669	96.1532	10.6669	91.3358	10.6669	91.3358	10.6669	91.3358	10.6669	91.3358	10.6669	91.3358	10.6669	91.3358	10.6669	91.3358	10.6669	4.39654	10.6669	107.824	10.6669	137.193
10.6835	93.6533	10.6835	96.0558	10.6835	96.0558	10.6835	96.0558	10.6835	96.0558	10.6835	96.0558	10.6835	96.0558	10.6835	96.0558	10.6835	4.26359	10.6835	107.111	10.6835	137.907
10.7002	92.4033	10.7002	80.2174	10.7002	80.2174	10.7002	80.2174	10.7002	80.2174	10.7002	80.2174	10.7002	80.2174	10.7002	80.2174	10.7002	-0.338591	10.7002	107.706	10.7002	136.342
10.7169	102.403	10.7169	84.9606	10.7169	84.9606	10.7169	84.9606	10.7169	84.9606	10.7169	84.9606	10.7169	84.9606	10.7169	84.9606	10.7169	10.184	10.7169	101.767	10.7169	139.999
10.7335	109.903	10.7335	90.2763	10.7335	90.2763	10.7335	90.2763	10.7335	90.2763	10.7335	90.2763	10.7335	90.2763	10.7335	90.2763	10.7335	8.63147	10.7335	98.3951	10.7335	140.269
10.7502	103.653	10.7502	84.8096	10.7502	84.8096	10.7502	84.8096	10.7502	84.8096	10.7502	84.8096	10.7502	84.8096	10.7502	84.8096	10.7502	6.49856	10.7502	111.153	10.7502	151.691
10.7669	106.153	10.7669	83.7672	10.7669	83.7672	10.7669	83.7672	10.7669	83.7672	10.7669	83.7672	10.7669	83.7672	10.7669	83.7672	10.7669	4.18053	10.7669	120.696	10.7669	151.253
10.7835	107.403	10.7835	82.6388	10.7835	82.6388	10.7835	82.6388	10.7835	82.6388	10.7835	82.6388	10.7835	82.6388	10.7835	82.6388	10.7835	11.9457	10.7835	108.788	10.7835	152.423
10.8002	114.903	10.8002	85.8924	10.8002	85.8924	10.8002	85.8924	10.8002	85.8924	10.8002	85.8924	10.8002	85.8924	10.8002	85.8924	10.8002	-1.43363	10.8002	115.272	10.8002	144.206
10.8169	111.153	10.8169	99.3076	10.8169	99.3076	10.8169	99.3076	10.8169	99.3076	10.8169	99.3076	10.8169	99.3076	10.8169	99.3076	10.8169	11.1938	10.8169	113.347	10.8169	156.849
10.8336	108.653	10.8336	100.121	10.8336	100.121	10.8336	100.121	10.8336	100.121	10.8336	100.121	10.8336	100.121	10.8336	100.121	10.8336	9.98468	10.8336	122.974	10.8336	147.231
10.8502	103.653	10.8502	85.3858	10.8502	85.3858	10.8502	85.3858	10.8502	85.3858	10.8502	85.3858	10.8502	85.3858	10.8502	85.3858	10.8502	13.5804	10.8502	116.174	10.8502	160.553
10.8669	111.153	10.8669	87.0298	10.8669	87.0298	10.8669	87.0298	10.8669	87.0298	10.8669	87.0298	10.8669	87.0298	10.8669	87.0298	10.8669	10.4877	10.8669	125.671	10.8669	150.401
10.8836	111.153	10.8836	92.2019	10.8836	92.2019	10.8836	92.2019	10.8836	92.2019	10.8836	92.2019	10.8836	92.2019	10.8836	92.2019	10.8836	-6.63103	10.8836	114.992	10.8836	157.474
10.9002	107.403	10.9002	99.0328	10.9002	99.0328	10.9002	99.0328	10.9002	99.0328	10.9002	99.0328	10.9002	99.0328	10.9002	99.0328	10.9002	11.9497	10.9002	122.771	10.9002	160.296
10.9169	117.403	10.9169	96.6007	10.9169	96.6007	10.9169	96.6007	10.9169	96.6007	10.9169	96.6007	10.9169	96.6007	10.9169	96.6007	10.9169	8.40059	10.9169	124.276	10.9169	154.337
10.9336	107.403	10.9336	89.6872	10.9336	89.6872	10.9336	89.6872	10.9336	89.6872	10.9336	89.6872	10.9336	89.6872	10.9336	89.6872	10.9336	21.174	10.9336	116.653	10.9336	157.779
10.9502	104.903	10.9502	97.351	10.9502	97.351	10.9502	97.351	10.9502	97.351	10.9502	97.351	10.9502	97.351	10.9502	97.351	10.9502	20.7711	10.9502	121.163	10.9502	163.08
10.9669	109.903	10.9669	93.0652	10.9669	93.0652	10.9669	93.0652	10.9669	93.0652	10.9669	93.0652	10.9669	93.0652	10.9669	93.0652	10.9669	18.8773	10.9669	123.557	10.9669	166.206
10.9836	111.153	10.9836	98.4528	10.9836	98.4528	10.9836	98.4528	10.9836	98.4528	10.9836	98.4528	10.9836	98.4528	10.9836	98.4528	10.9836	21.0407	10.9836	121.228	10.9836	159.21
11.0002	109.903	11.0002	99.8717	11.0002	99.8717	11.0002	99.8717	11.0002	99.8717	11.0002	99.8717	11.0002	99.8717	11.0002	99.8717	11.0002	6.62348	11.0002	127.808	11.0002	162.89
11.0169	121.153	11.0169	100.117	11.0169	100.117	11.0169	100.117	11.0169	100.117	11.0169	100.117	11.0169	100.117	11.0169	100.117	11.0169	20.3816	11.0169	126.147	11.0169	164.272
11.0336	107.403	11.0336	103.169	11.0336	103.169	11.0336	103.169	11.0336	103.169	11.0336	103.169	11.0336	103.169	11.0336	103.169	11.0336	16.707	11.0336	134.556	11.0336	175.668
11.0502	121.153	11.0502	98.4106	11.0502	98.4106	11.0502	98.4106	11.0502	98.4106	11.0502	98.4106	11.0502	98.4106	11.0502	98.4106	11.0502	18.0174	11.0502	131.465	11.0502	171.123
11.0669	109.903	11.0669	95.8668	11.0669	95.8668	11.0669	95.8668	11.0669	95.8668	11.0669	95.8668	11.0669	95.8668	11.0669	95.8668	11.0669	14.3244	11.0669	136.411	11.0669	179.628
11.0836	103.653	11.0836	98.9891	11.0836	98.9891	11.0836	98.9891	11.0836	98.9891	11.0836	98.9891	11.0836	98.9891	11.0836	98.9891	11.0836	18.0188	11.0836	130.613	11.0836	171.872
11.1002	111.153	11.1002	106.845	11.1002	106.845	11.1002	106.845	11.1002	106.845	11.1002	106.845	11.1002	106.845	11.1002	106.845	11.1002	18.9064	11.1002	143.392	11.1002	174.634
11.1169	113.653	11.1169	110.421	11.1169	110.421	11.1169	110.421	11.1169	110.421	11.1169	110.421	11.1169	110.421	11.1169	110.421	11.1169	17.9477	11.1169	137.627	11.1169	181.468
11.1336	108.653	11.1336	104.477	11.1336	104.477	11.1336	104.477	11.1336	104.477	11.1336	104.477	11.1336	104.477	11.1336	104.477	11.1336	13.1468	11.1336	141.318	11.1336	177.794
11.1502	108.653	11.1502	105.925	11.1502	105.925	11.1502	105.925	11.1502	105.925	11.1502	105.925	11.1502	105.925	11.1502	105.925	11.1502	18.3991	11.1502	133.284	11.1502	176.951
11.1669	124.903	11.1669	104.728	11.1669	104.728	11.1669	104.728	11.1669	104.728	11.1669	104.728	11.1669	104.728	11.1669	104.728	11.1669	25.7379	11.1669	136.18	11.1669	166.293
11.1836	121.153	11.1836	116.602	11.1836	116.602	11.1836	116.602	11.1836	116.602	11.1836	116.602	11.1836	116.602	11.1836	116.602	11.1836	29.4547	11.1836	143.737	11.1836	0.888066
11.2002	128.653	11.2002	111.056	11.2002	111.056	11.2002	111.056	11.2002	111.056	11.2002	111.056	11.2002	111.056	11.2002	111.056	11.2002	28.8292	11.2002	136.21	11.2002	3.28146
11.2169	139.903	11.2169	112.038	11.2169	112.038	11.2169	112.038	11.2169	112.038	11.2169	112.038	11.2169	112.038	11.2169	112.038	11.2169	24.3279	11.2169	146.274	11.2169	13.5192
11.2336	119.903	11.2336	113.48	11.2336	113.48	11.2336	113.48	11.2336	113.48	11.2336	113.48	11.2336	113.48	11.2336	113.48	11.2336	26.1574	11.2336	137.153	11.2336	13.2157
11.2502	123.653	11.2502	107.57	11.2502	107.57	11.2502	107.57	11.2502	107.57	11.2502	107.57	11.2502	107.57	11.2502	107.57	11.2502	25.9978	11.2502	142.619	11.2502	12.5931
11.2669	119.904	11.2669	110.633	11.2669	110.633	11.2669	110.633	11.2669	110.633	11.2669	110.633	11.2669	110.633	11.2669	110.633	11.2669	20.9471	11.2669	150.191	11.2669	11.7427
11.2836	122.404	11.2836	108.877	11.2836	108.877	11.2836	108.877	11.2836	108.877	11.2836	108.877	11.2836	108.877	11.2836	108.877	11.2836	26.8327	11.2836	150.629	11.2836	5.06908
11.3002	133.654	11.3002	118.545	11.3002	118.545	11.3002	118.545	11.3002	118.545	11.3002	118.545	11.3002	118.545	11.3002	118.545	11.3002	39.9488	11.3002	152.838	11.3002	8.012
11.3169	136.154	11.3169	114.35	11.3169	114.35	11.3169	114.35	11.3169	114.35	11.3169	114.35	11.3169	114.35	11.3169	114.35	11.3169	28.784	11.3169	150.145	11.3169	5.81
11.3336	139.904	11.3336	112.965	11.3336	112.965	11.3336	112.965	11.3336	112.965	11.3336	112.965	11.3336	112.965	11.3336	112.965	11.3336	27.5931	11.3336	138.148	11.3336	13.0715
11.3502	127.404	11.3502	118.036	11.3502	118.036	11.3502	118.036	11.3502	118.036	11.3502	118.036	11.3502	118.036	11.3502	118.036	11.3502	22.4802	11.3502	151.029	11.3502	14.8438
11.3669	129.904	11.3669	111.826	11.3669	111.826	11.3669	111.826	11.3669	111.826	11.3669	111.826	11.3669	111.826	11.3669	111.826	11.3669	35.5067	11.3669	142.911	11.3669	16.9482
11.3836	138.654	11.3836	120.898	11.3836	120.898	11.3836	120.898	11.3836	120.898	11.3836	120.898	11.3836	120.898	11.3836	120.898	11.3836	41.1049	11.3836	153.825	11.3836	30.5737
11.4002	133.654	11.4002	115.242	11.4002	115.242	11.4002	115.242	11.4002	115.242	11.4002	115.242	11.4002	115.242	11.4002	115.242	11.4002	33.387	11.4002	152.169	11.4002	23.3974
11.4169	152.404	11.4169	119.049	11.4169	119.049	11.4169	119.049	11.4169	119.049	11.4169	119.049	11.4169	119.049	11.4169	119.049	11.4169	35.208	11.4169	150.108	11.4169	27.0665
11.4336	137.404	11.4336	119.189	11.4336	119.189	11.4336	119.189	11.4336	119.189	11.4336	119.189	11.4336	119.189	11.4336	119.189	11.4336	34.7609	11.4336	149.033	11.4336	24.2574
11.4502	134.904	11.4502	123.022	11.4502	123.022	11.4502	123.022	11.4502	123.022	11.4502	123.022	11.4502	123.022	11.4502	123.022	11.4502	47.684	11.4502	160.41	11.4502	21.1543
11.4669	139.904	11.4669	126.961	11.4669	126.961	11.4669	126.961	11.4669	126.961	11.4669	126.961	11.4669	126.961	11.4669	126.961	11.4669	37.6355	11.4669	160.932	11.4669	23.7364
11.4836	141.154	11.4836	121.318	11.4836	121.318	11.4836	121.318	11.4836	121.318	11.4836	121.318	11.4836	121.318	11.4836	121.318	11.4836	43.6644	11.4836	160.513	11.4836	18.758
11.5002	138.654	11.5002	122.435	11.5002	122.435	11.5002	122.435	11.5002	122.435	11.5002	122.435	11.5002	122.435	11.5002	122.435	11.5002	44.7629	11.5002	162.562	11.5002	25.3312
11.5169	141.154	11.5169	121.241	11.5169	121.241	11.5169	121.241	11.5169	121.241	11.5169	121.241	11.5169	121.241	11.5169	121.241	11.5169	43.6683	11.5169	165.302	11.5169	27.0151
11.5336	141.154	11.5336	123.701	11.5336	123.701	11.5336	123.701	11.5336	123.701	11.5336	123.701	11.5336	123.701	11.5336	123.701	11.5336	46.3843	11.5336	158.788	11.5336	26.6046
11.5502	146.154	11.5502	129.443	11.5502	129.443	11.5502	129.443	11.5502	129.443	11.5502	129.443	11.5502	129.443	11.5502	129.443	11.5502	38.2523	11.5502	165.913	11.5502	36.3652
11.5669	146.154	11.5669	127.225	11.5669	127.225	11.5669	127.225	11.5669	127.225	11.5669	127.225	11.5669	127.225	11.5669	127.225	11.5669	47.7584	11.5669	173.789	11.5669	31.1761
11.5836	152.404	11.5836	132.227	11.5836	132.227	11.5836	132.227	11.5836	132.227	11.5836	132.227	11.5836	132.227	11.5836	132.227	11.5836	49.3454	11.5836	162.296	11.5836	32.5689
11.6002	152.404	11.6002	133.164	11.6002	133.164	11.6002	133.164	11.6002	133.164	11.6002	133.164	11.6002	133.164	11.6002	133.164	11.6002	52.3022	11.6002	152.378	11.6002	36.8632
11.6169	157.404	11.6169	131.439	11.6169	131.439	11.6169	131.439	11.6169	131.439	11.6169	131.439	11.6169	131.439	11.6169	131.439	11.6169	40.6718	11.6169	158.731	11.6169	28.9374
11.6336	154.904	11.6336	128.359	11.6336	128.359	11.6336	128.359	11.6336	128.359	11.6336	128.359	11.6336	128.359	11.6336	128.359	11.6336	51.559	11.6336	157.774	11.6336	42.704
11.6502	153.654	11.6502	125.753	11.6502	125.753	11.6502	125.753	11.6502	125.753	11.6502	125.753	11.6502	125.753	11.6502	125.753	11.6502	43.1671	11.6502	166.793	11.6502	52.5484
11.6669	157.404	11.6669	129.883	11.6669	129.883	11.6669	129.883	11.6669	129.883	11.6669	129.883	11.6669	129.883	11.6669	129.883	11.6669	47.5316	11.6669	152.156	11.6669	51.1635
11.6836	158.654	11.6836	126.444	11.6836	126.444	11.6836	126.444	11.6836	126.444	11.6836	126.444	11.6836	126.444	11.6836	126.444	11.6836	62.9738	11.6836	160.397	11.6836	40.382
11.7002	162.404	11.7002	131.044	11.7002	131.044	11.7002	131.044	11.7002	131.044	11.7002	131.044	11.7002	131.044	11.7002	131.044	11.7002	58.8374	11.7002	168.614	11.7002	43.7817
11.7169	157.404	11.7169	127.292	11.7169	127.292	11.7169	127.292	11.7169	127.292	11.7169	127.292	11.7169	127.292	11.7169	127.292	11.7169	49.8749	11.7169	168.136	11.7169	44.1611
11.7336	149.904	11.7336	128.627	11.7336	128.627	11.7336	128.627	11.7336	128.627	11.7336	128.627	11.7336	128.627	11.7336	128.627	11.7336	49.5148	11.7336	167.792	11.7336	51.0568
11.7502	157.404	11.7502	133.87	11.7502	133.87	11.7502	133.87	11.7502	133.87	11.7502	133.87	11.7502	133.87	11.7502	133.87	11.7502	60.5678	11.7502	176.074	11.7502	47.4827
11.7669	152.404	11.7669	133.341	11.7669	133.341	11.7669	133.341	11.7669	133.341	11.7669	133.341	11.7669	133.341	11.7669	133.341	11.7669	51.1783	11.7669	4.97395	11.7669	46.3357
11.7836	156.154	11.7836	137.451	11.7836	137.451	11.7836	137.451	11.7836	137.451	11.7836	137.451	11.7836	137.451	11.7836	137.451	11.7836	64.461	11.7836	6.12309	11.7836	44.225
11.8002	147.404	11.8002	124.98	11.8002	124.98	11.8002	124.98	11.8002	124.98	11.8002	124.98	11.8002	124.98	11.8002	124.98	11.8002	59.6467	11.8002	8.4788	11.8002	43.1776
11.8169	153.654	11.8169	129.971	11.8169	129.971	11.8169	129.971	11.8169	129.971	11.8169	129.971	11.8169	129.971	11.8169	129.971	11.8169	61.7512	11.8169	10.5107	11.8169	34.5316
11.8336	166.154	11.8336	127.232	11.8336	127.232	11.8336	127.232	11.8336	127.232	11.8336	127.232	11.8336	127.232	11.8336	127.232	11.8336	63.4365	11.8336	3.8089	11.8336	47.3657
11.8502	158.654	11.8502	125.761	11.8502	125.761	11.8502	125.761	11.8502	125.761	11.8502	125.761	11.8502	125.761	11.8502	125.761	11.8502	72.3509	11.8502	4.65093	11.8502	42.0133
11.8669	148.654	11.8669	140.394	11.8669	140.394	11.8669	140.394	11.8669	140.394	11.8669	140.394	11.8669	140.394	11.8669	140.394	11.8669	68.3362	11.8669	-1.62693	11.8669	50.0452
11.8836	138.654	11.8836	143.482	11.8836	143.482	11.8836	143.482	11.8836	143.482	11.8836	143.482	11.8836	143.482	11.8836	143.482	11.8836	64.4355	11.8836	12.1566	11.8836	52.6643
11.9002	10.1556	11.9002	135.878	11.9002	135.878	11.9002	135.878	11.9002	135.878	11.9002	135.878	11.9002	135.878	11.9002	135.878	11.9002	65.0073	11.9002	18.6425	11.9002	51.9931
11.9169	-2.34436	11.9169	141.797	11.9169	141.797	11.9169	141.797	11.9169	141.797	11.9169	141.797	11.9169	141.797	11.9169	141.797	11.9169	60.0297	11.9169	2.88429	11.9169	65.6296
11.9336	-7.34435	11.9336	137.956	11.9336	137.956	11.9336	137.956	11.9336	137.956	11.9336	137.956	11.9336	137.956	11.9336	137.956	11.9336	69.5791	11.9336	8.63592	11.9336	67.6049
11.9502	2.65566	11.9502	140.305	11.9502	140.305	11.9502	140.305	11.9502	140.305	11.9502	140.305	11.9502	140.305	11.9502	140.305	11.9502	64.4327	11.9502	1.49473	11.9502	65.6618
11.9669	0.155665	11.9669	150.057	11.9669	150.057	11.9669	150.057	11.9669	150.057	11.9669	150.057	11.9669	150.057	11.9669	150.057	11.9669	77.0195	11.9669	12.4786	11.9669	64.0115
11.9836	5.15567	11.9836	140.809	11.9836	140.809	11.9836	140.809	11.9836	140.809	11.9836	140.809	11.9836	140.809	11.9836	140.809	11.9836	75.6537	11.9836	22.9821	11.9836	62.5296
12.0002	-2.34432	12.0002	139.495	12.0002	139.495	12.0002	139.495	12.0002	139.495	12.0002	139.495	12.0002	139.495	12.0002	139.495	12.0002	75.1101	12.0002	17.9577	12.0002	61.042
12.0169	-3.59431	12.0169	142.823	12.0169	142.823	12.0169	142.823	12.0169	142.823	12.0169	142.823	12.0169	142.823	12.0169	142.823	12.0169	69.6443	12.0169	18.749	12.0169	57.9026
12.0336	0.155694	12.0336	147.763	12.0336	147.763	12.0336	147.763	12.0336	147.763	12.0336	147.763	12.0336	147.763	12.0336	147.763	12.0336	73.8558	12.0336	15.5314	12.0336	63.4221
12.0502	-2.3443	12.0502	142.438	12.0502	142.438	12.0502	142.438	12.0502	142.438	12.0502	142.438	12.0502	142.438	12.0502	142.438	12.0502	74.3909	12.0502	9.58416	12.0502	72.9335
12.0669	-6.09429	12.0669	150.961	12.0669	150.961	12.0669	150.961	12.0669	150.961	12.0669	150.961	12.0669	150.961	12.0669	150.961	12.0669	73.6505	12.0669	11.7858	12.0669	75.5336
12.0836	-9.84428	12.0836	148.932	12.0836	148.932	12.0836	148.932	12.0836	148.932	12.0836	148.932	12.0836	148.932	12.0836	148.932	12.0836	74.5076	12.0836	14.9797	12.0836	80.4124
12.1002	-2.34428	12.1002	156.993	12.1002	156.993	12.1002	156.993	12.1002	156.993	12.1002	156.993	12.1002	156.993	12.1002	156.993	12.1002	74.9707	12.1002	8.8044	12.1002	70.7123
12.1169	2.65573	12.1169	160.049	12.1169	160.049	12.1169	160.049	12.1169	160.049	12.1169	160.049	12.1169	160.049	12.1169	160.049	12.1169	80.1758	12.1169	15.0683	12.1169	84.4826
12.1336	2.65574	12.1336	153.541	12.1336	153.541	12.1336	153.541	12.1336	153.541	12.1336	153.541	12.1336	153.541	12.1336	153.541	12.1336	82.6317	12.1336	21.9555	12.1336	66.5893
12.1502	6.40574	12.1502	153.219	12.1502	153.219	12.1502	153.219	12.1502	153.219	12.1502	153.219	12.1502	153.219	12.1502	153.219	12.1502	69.0708	12.1502	20.2211	12.1502	76.2795
12.1669	2.65575	12.1669	150.973	12.1669	150.973	12.1669	150.973	12.1669	150.973	12.1669	150.973	12.1669	150.973	12.1669	150.973	12.1669	80.637	12.1669	13.6938	12.1669	86.5437
12.1836	12.6558	12.1836	146.142	12.1836	146.142	12.1836	146.142	12.1836	146.142	12.1836	146.142	12.1836	146.142	12.1836	146.142	12.1836	79.3034	12.1836	19.7951	12.1836	91.0902
12.2002	10.1558	12.2002	152.38	12.2002	152.38	12.2002	152.38	12.2002	152.38	12.2002	152.38	12.2002	152.38	12.2002	152.38	12.2002	81.9896	12.2002	16.6551	12.2002	83.6642
12.2169	1.40577	12.2169	161.964	12.2169	161.964	12.2169	161.964	12.2169	161.964	12.2169	161.964	12.2169	161.964	12.2169	161.964	12.2169	80.855	12.2169	15.9183	12.2169	81.2409
12.2336	11.4058	12.2336	156.288	12.2336	156.288	12.2336	156.288	12.2336	156.288	12.2336	156.288	12.2336	156.288	12.2336	156.288	12.2336	79.369	12.2336	7.94622	12.2336	78.787
12.2502	21.4058	12.2502	159.648	12.2502	159.648	12.2502	159.648	12.2502	159.648	12.2502	159.648	12.2502	159.648	12.2502	159.648	12.2502	76.8813	12.2502	17.4516	12.2502	80.1646
12.2669	18.9058	12.2669	159.43	12.2669	159.43	12.2669	159.43	12.2669	159.43	12.2669	159.43	12.2669	159.43	12.2669	159.43	12.2669	77.4386	12.2669	13.3314	12.2669	81.9911
12.2836	11.4058	12.2836	161.035	12.2836	161.035	12.2836	161.035	12.2836	161.035	12.2836	161.035	12.2836	161.035	12.2836	161.035	12.2836	73.0065	12.2836	21.1519	12.2836	84.8693
12.3002	17.6558	12.3002	165.605	12.3002	165.605	12.3002	165.605	12.3002	165.605	12.3002	165.605	12.3002	165.605	12.3002	165.605	12.3002	80.429	12.3002	11.3486	12.3002	84.7263
12.3169	13.9058	12.3169	167.841	12.3169	167.841	12.3169	167.841	12.3169	167.841	12.3169	167.841	12.3169	167.841	12.3169	167.841	12.3169	75.8271	12.3169	29.2683	12.3169	77.6182
12.3336	21.4058	12.3336	150.213	12.3336	150.213	12.3336	150.213	12.3336	150.213	12.3336	150.213	12.3336	150.213	12.3336	150.213	12.3336	84.0638	12.3336	25.9728	12.3336	82.401
12.3502	31.4058	12.3502	161.284	12.3502	161.284	12.3502	161.284	12.3502	161.284	12.3502	161.284	12.3502	161.284	12.3502	161.284	12.3502	91.5492	12.3502	17.3454	12.3502	82.5105
12.3669	18.9058	12.3669	163.282	12.3669	163.282	12.3669	163.282	12.3669	163.282	12.3669	163.282	12.3669	163.282	12.3669	163.282	12.3669	83.0131	12.3669	31.9013	12.3669	79.2514
12.3836	26.4058	12.3836	164.901	12.3836	164.901	12.3836	164.901	12.3836	164.901	12.3836	164.901	12.3836	164.901	12.3836	164.901	12.3836	79.6513	12.3836	20.4365	12.3836	89.7851
12.4002	13.9059	12.4002	161.039	12.4002	161.039	12.4002	161.039	12.4002	161.039	12.4002	161.039	12.4002	161.039	12.4002	161.039	12.4002	76.1939	12.4002	19.3111	12.4002	76.2422
12.4169	16.4059	12.4169	162.801	12.4169	162.801	12.4169	162.801	12.4169	162.801	12.4169	162.801	12.4169	162.801	12.4169	162.801	12.4169	81.7381	12.4169	24.4712	12.4169	72.161
12.4336	15.1559	12.4336	154.326	12.4336	154.326	12.4336	154.326	12.4336	154.326	12.4336	154.326	12.4336	154.326	12.4336	154.326	12.4336	86.4618	12.4336	22.0007	12.4336	88.2537
12.4502	16.4059	12.4502	170.543	12.4502	170.543	12.4502	170.543	12.4502	170.543	12.4502	170.543	12.4502	170.543	12.4502	170.543	12.4502	84.7749	12.4502	26.8111	12.4502	83.6078
12.4669	20.1559	12.4669	172.493	12.4669	172.493	12.4669	172.493	12.4669	172.493	12.4669	172.493	12.4669	172.493	12.4669	172.493	12.4669	90.6069	12.4669	18.2169	12.4669	81.489
12.4836	40.1559	12.4836	-3.72578	12.4836	-3.72578	12.4836	-3.72578	12.4836	-3.72578	12.4836	-3.72578	12.4836	-3.72578	12.4836	-3.72578	12.4836	88.3327	12.4836	25.6761	12.4836	87.9296
12.5003	22.6559	12.5003	-5.68521	12.5003	-5.68521	12.5003	-5.68521	12.5003	-5.68521	12.5003	-5.68521	12.5003	-5.68521	12.5003	-5.68521	12.5003	87.8704	12.5003	19.0583	12.5003	79.2557
12.5169	25.1559	12.5169	1.49075	12.5169	1.49075	12.5169	1.49075	12.5169	1.49075	12.5169	1.49075	12.5169	1.49075	12.5169	1.49075	12.5169	92.1333	12.5169	25.9651	12.5169	76.148
12.5336	17.6559	12.5336	7.13727	12.5336	7.13727	12.5336	7.13727	12.5336	7.13727	12.5336	7.13727	12.5336	7.13727	12.5336	7.13727	12.5336	74.1681	12.5336	22.7476	12.5336	85.1138
12.5503	20.1559	12.5503	1.27314	12.5503	1.27314	12.5503	1.27314	12.5503	1.27314	12.5503	1.27314	12.5503	1.27314	12.5503	1.27314	12.5503	87.6417	12.5503	25.6909	12.5503	89.6355
12.5669	21.4059	12.5669	-5.46659	12.5669	-5.46659	12.5669	-5.46659	12.5669	-5.46659	12.5669	-5.46659	12.5669	-5.46659	12.5669	-5.46659	12.5669	96.6915	12.5669	17.6157	12.5669	85.4853
12.5836	11.4059	12.5836	4.29485	12.5836	4.29485	12.5836	4.29485	12.5836	4.29485	12.5836	4.29485	12.5836	4.29485	12.5836	4.29485	12.5836	88.4152	12.5836	19.5432	12.5836	87.3056
12.6003	12.6559	12.6003	8.49468	12.6003	8.49468	12.6003	8.49468	12.6003	8.49468	12.6003	8.49468	12.6003	8.49468	12.6003	8.49468	12.6003	85.5798	12.6003	18.7716	12.6003	82.0109
12.6169	13.9059	12.6169	13.4878	12.6169	13.4878	12.6169	13.4878	12.6169	13.4878	12.6169	13.4878	12.6169	13.4878	12.6169	13.4878	12.6169	81.807	12.6169	19.7025	12.6169	93.783
12.6336	17.656	12.6336	13.2217	12.6336	13.2217	12.6336	13.2217	12.6336	13.2217	12.6336	13.2217	12.6336	13.2217	12.6336	13.2217	12.6336	87.9452	12.6336	12.2376	12.6336	83.9716
12.6503	13.906	12.6503	9.90801	12.6503	9.90801	12.6503	9.90801	12.6503	9.90801	12.6503	9.90801	12.6503	9.90801	12.6503	9.90801	12.6503	93.004	12.6503	20.397	12.6503	88.5187
12.6669	25.156	12.6669	8.50896	12.6669	8.50896	12.6669	8.50896	12.6669	8.50896	12.6669	8.50896	12.6669	8.50896	12.6669	8.50896	12.6669	96.1088	12.6669	9.10918	12.6669	77.6977
12.6836	25.156	12.6836	19.4004	12.6836	19.4004	12.6836	19.4004	12.6836	19.4004	12.6836	19.4004	12.6836	19.4004	12.6836	19.4004	12.6836	92.178	12.6836	20.2133	12.6836	90.6659
12.7003	13.906	12.7003	4.72958	12.7003	4.72958	12.7003	4.72958	12.7003	4.72958	12.7003	4.72958	12.7003	4.72958	12.7003	4.72958	12.7003	91.0472	12.7003	23.2837	12.7003	87.3528
12.7169	22.656	12.7169	2.52933	12.7169	2.52933	12.7169	2.52933	12.7169	2.52933	12.7169	2.52933	12.7169	2.52933	12.7169	2.52933	12.7169	90.1473	12.7169	24.1233	12.7169	80.8491
12.7336	18.906	12.7336	0.0164409	12.7336	0.0164409	12.7336	0.0164409	12.7336	0.0164409	12.7336	0.0164409	12.7336	0.0164409	12.7336	0.0164409	12.7336	102.426	12.7336	31.1554	12.7336	90.885
12.7503	30.156	12.7503	13.7348	12.7503	13.7348	12.7503	13.7348	12.7503	13.7348	12.7503	13.7348	12.7503	13.7348	12.7503	13.7348	12.7503	88.0005	12.7503	17.6415	12.7503	79.4654
12.7669	28.906	12.7669	16.5533	12.7669	16.5533	12.7669	16.5533	12.7669	16.5533	12.7669	16.5533	12.7669	16.5533	12.7669	16.5533	12.7669	99.9317	12.7669	20.1603	12.7669	90.9225
12.7836	43.906	12.7836	12.1436	12.7836	12.1436	12.7836	12.1436	12.7836	12.1436	12.7836	12.1436	12.7836	12.1436	12.7836	12.1436	12.7836	92.9375	12.7836	11.1603	12.7836	90.5702
12.8003	37.656	12.8003	13.095	12.8003	13.095	12.8003	13.095	12.8003	13.095	12.8003	13.095	12.8003	13.095	12.8003	13.095	12.8003	88.008	12.8003	22.9205	12.8003	104.427
12.8169	27.656	12.8169	21.3266	12.8169	21.3266	12.8169	21.3266	12.8169	21.3266	12.8169	21.3266	12.8169	21.3266	12.8169	21.3266	12.8169	101.59	12.8169	19.7307	12.8169	84.7505
12.8336	32.656	12.8336	12.6036	12.8336	12.6036	12.8336	12.6036	12.8336	12.6036	12.8336	12.6036	12.8336	12.6036	12.8336	12.6036	12.8336	94.3184	12.8336	19.6735	12.8336	92.6597
12.8503	46.406	12.8503	25.4996	12.8503	25.4996	12.8503	25.4996	12.8503	25.4996	12.8503	25.4996	12.8503	25.4996	12.8503	25.4996	12.8503	90.8459	12.8503	36.429	12.8503	102.914
12.8669	45.1561	12.8669	24.0525	12.8669	24.0525	12.8669	24.0525	12.8669	24.0525	12.8669	24.0525	12.8669	24.0525	12.8669	24.0525	12.8669	101.785	12.8669	30.205	12.8669	99.6708
12.8836	35.1561	12.8836	7.72417	12.8836	7.72417	12.8836	7.72417	12.8836	7.72417	12.8836	7.72417	12.8836	7.72417	12.8836	7.72417	12.8836	105.099	12.8836	28.0092	12.8836	90.7231
12.9003	38.9061	12.9003	10.6113	12.9003	10.6113	12.9003	10.6113	12.9003	10.6113	12.9003	10.6113	12.9003	10.6113	12.9003	10.6113	12.9003	102.687	12.9003	19.1952	12.9003	91.809
12.9169	43.9061	12.9169	22.9423	12.9169	22.9423	12.9169	22.9423	12.9169	22.9423	12.9169	22.9423	12.9169	22.9423	12.9169	22.9423	12.9169	100.539	12.9169	23.49	12.9169	93.1248
12.9336	60.1561	12.9336	15.9816	12.9336	15.9816	12.9336	15.9816	12.9336	15.9816	12.9336	15.9816	12.9336	15.9816	12.9336	15.9816	12.9336	108.922	12.9336	21.0413	12.9336	89.6968
12.9503	41.4061	12.9503	11.1172	12.9503	11.1172	12.9503	11.1172	12.9503	11.1172	12.9503	11.1172	12.9503	11.1172	12.9503	11.1172	12.9503	98.4197	12.9503	26.4409	12.9503	89.4198
12.9669	46.4061	12.9669	11.2992	12.9669	11.2992	12.9669	11.2992	12.9669	11.2992	12.9669	11.2992	12.9669	11.2992	12.9669	11.2992	12.9669	101.971	12.9669	33.2596	12.9669	97.3545
12.9836	51.4061	12.9836	12.7796	12.9836	12.7796	12.9836	12.7796	12.9836	12.7796	12.9836	12.7796	12.9836	12.7796	12.9836	12.7796	12.9836	110.666	12.9836	23.5797	12.9836	92.9493
13.0003	52.6561	13.0003	15.4078	13.0003	15.4078	13.0003	15.4078	13.0003	15.4078	13.0003	15.4078	13.0003	15.4078	13.0003	15.4078	13.0003	94.5678	13.0003	30.7629	13.0003	98.3038
13.0169	60.1561	13.0169	22.5376	13.0169	22.5376	13.0169	22.5376	13.0169	22.5376	13.0169	22.5376	13.0169	22.5376	13.0169	22.5376	13.0169	105.341	13.0169	30.3135	13.0169	89.4177
13.0336	52.6561	13.0336	21.1485	13.0336	21.1485	13.0336	21.1485	13.0336	21.1485	13.0336	21.1485	13.0336	21.1485	13.0336	21.1485	13.0336	94.6165	13.0336	32.2901	13.0336	96.4078
13.0503	51.4061	13.0503	31.5823	13.0503	31.5823	13.0503	31.5823	13.0503	31.5823	13.0503	31.5823	13.0503	31.5823	13.0503	31.5823	13.0503	96.0625	13.0503	41.8444	13.0503	97.2318
13.0669	62.6561	13.0669	16.8893	13.0669	16.8893	13.0669	16.8893	13.0669	16.8893	13.0669	16.8893	13.0669	16.8893	13.0669	16.8893	13.0669	102.392	13.0669	32.0005	13.0669	97.1429
13.0836	62.6561	13.0836	23.4785	13.0836	23.4785	13.0836	23.4785	13.0836	23.4785	13.0836	23.4785	13.0836	23.4785	13.0836	23.4785	13.0836	113.741	13.0836	48.9055	13.0836	103.686
13.1003	61.4062	13.1003	18.9119	13.1003	18.9119	13.1003	18.9119	13.1003	18.9119	13.1003	18.9119	13.1003	18.9119	13.1003	18.9119	13.1003	109.579	13.1003	42.5587	13.1003	96.5746
13.1169	63.9062	13.1169	18.3618	13.1169	18.3618	13.1169	18.3618	13.1169	18.3618	13.1169	18.3618	13.1169	18.3618	13.1169	18.3618	13.1169	108.757	13.1169	50.994	13.1169	107.972
13.1336	65.1562	13.1336	18.806	13.1336	18.806	13.1336	18.806	13.1336	18.806	13.1336	18.806	13.1336	18.806	13.1336	18.806	13.1336	113.337	13.1336	51.2016	13.1336	102.37
13.1503	72.6562	13.1503	24.4969	13.1503	24.4969	13.1503	24.4969	13.1503	24.4969	13.1503	24.4969	13.1503	24.4969	13.1503	24.4969	13.1503	112.063	13.1503	62.641	13.1503	106.576
13.1669	63.9062	13.1669	21.4823	13.1669	21.4823	13.1669	21.4823	13.1669	21.4823	13.1669	21.4823	13.1669	21.4823	13.1669	21.4823	13.1669	111.944	13.1669	67.6528	13.1669	97.2633
13.1836	73.9062	13.1836	33.8204	13.1836	33.8204	13.1836	33.8204	13.1836	33.8204	13.1836	33.8204	13.1836	33.8204	13.1836	33.8204	13.1836	122.098	13.1836	52.5348	13.1836	111.829
13.2003	76.4062	13.2003	27.0909	13.2003	27.0909	13.2003	27.0909	13.2003	27.0909	13.2003	27.0909	13.2003	27.0909	13.2003	27.0909	13.2003	117.674	13.2003	54.8455	13.2003	114.612
13.2169	67.6562	13.2169	18.117	13.2169	18.117	13.2169	18.117	13.2169	18.117	13.2169	18.117	13.2169	18.117	13.2169	18.117	13.2169	117.865	13.2169	72.3279	13.2169	114.118
13.2336	83.9062	13.2336	11.6085	13.2336	11.6085	13.2336	11.6085	13.2336	11.6085	13.2336	11.6085	13.2336	11.6085	13.2336	11.6085	13.2336	122.646	13.2336	55.0398	13.2336	108.785
13.2503	81.4062	13.2503	18.048	13.2503	18.048	13.2503	18.048	13.2503	18.048	13.2503	18.048	13.2503	18.048	13.2503	18.048	13.2503	122.667	13.2503	64.4528	13.2503	112.275
13.2669	81.4062	13.2669	24.0162	13.2669	24.0162	13.2669	24.0162	13.2669	24.0162	13.2669	24.0162	13.2669	24.0162	13.2669	24.0162	13.2669	118.393	13.2669	61.407	13.2669	101.587
13.2836	78.9062	13.2836	34.7194	13.2836	34.7194	13.2836	34.7194	13.2836	34.7194	13.2836	34.7194	13.2836	34.7194	13.2836	34.7194	13.2836	118.771	13.2836	61.6369	13.2836	115.583
13.3003	78.9062	13.3003	37.8912	13.3003	37.8912	13.3003	37.8912	13.3003	37.8912	13.3003	37.8912	13.3003	37.8912	13.3003	37.8912	13.3003	120.14	13.3003	55.6906	13.3003	117.035
13.3169	81.4062	13.3169	33.3304	13.3169	33.3304	13.3169	33.3304	13.3169	33.3304	13.3169	33.3304	13.3169	33.3304	13.3169	33.3304	13.3169	118.165	13.3169	64.5533	13.3169	114.591
13.3336	93.9062	13.3336	21.3807	13.3336	21.3807	13.3336	21.3807	13.3336	21.3807	13.3336	21.3807	13.3336	21.3807	13.3336	21.3807	13.3336	122.234	13.3336	65.841	13.3336	119.596
13.3503	83.9063	13.3503	28.0791	13.3503	28.0791	13.3503	28.0791	13.3503	28.0791	13.3503	28.0791	13.3503	28.0791	13.3503	28.0791	13.3503	123.217	13.3503	61.9529	13.3503	112.377
13.3669	92.6563	13.3669	33.5443	13.3669	33.5443	13.3669	33.5443	13.3669	33.5443	13.3669	33.5443	13.3669	33.5443	13.3669	33.5443	13.3669	118.982	13.3669	80.1642	13.3669	112.946
13.3836	72.6563	13.3836	26.104	13.3836	26.104	13.3836	26.104	13.3836	26.104	13.3836	26.104	13.3836	26.104	13.3836	26.104	13.3836	125.024	13.3836	71.5049	13.3836	120.035
13.4003	83.9063	13.4003	40.7292	13.4003	40.7292	13.4003	40.7292	13.4003	40.7292	13.4003	40.7292	13.4003	40.7292	13.4003	40.7292	13.4003	126.138	13.4003	70.0267	13.4003	117.998
13.4169	85.1563	13.4169	30.9272	13.4169	30.9272	13.4169	30.9272	13.4169	30.9272	13.4169	30.9272	13.4169	30.9272	13.4169	30.9272	13.4169	125.19	13.4169	62.2379	13.4169	119.258
13.4336	87.6563	13.4336	47.1469	13.4336	47.1469	13.4336	47.1469	13.4336	47.1469	13.4336	47.1469	13.4336	47.1469	13.4336	47.1469	13.4336	118.955	13.4336	79.7785	13.4336	109.82
13.4503	80.1563	13.4503	45.1409	13.4503	45.1409	13.4503	45.1409	13.4503	45.1409	13.4503	45.1409	13.4503	45.1409	13.4503	45.1409	13.4503	131.697	13.4503	76.2186	13.4503	119.628
13.4669	88.9063	13.4669	29.8469	13.4669	29.8469	13.4669	29.8469	13.4669	29.8469	13.4669	29.8469	13.4669	29.8469	13.4669	29.8469	13.4669	125.925	13.4669	74.7891	13.4669	129.19
13.4836	96.4063	13.4836	37.4863	13.4836	37.4863	13.4836	37.4863	13.4836	37.4863	13.4836	37.4863	13.4836	37.4863	13.4836	37.4863	13.4836	127.845	13.4836	81.9086	13.4836	106.867
13.5003	100.156	13.5003	33.3484	13.5003	33.3484	13.5003	33.3484	13.5003	33.3484	13.5003	33.3484	13.5003	33.3484	13.5003	33.3484	13.5003	124.956	13.5003	78.5752	13.5003	117.871
13.5169	87.6563	13.5169	37.9718	13.5169	37.9718	13.5169	37.9718	13.5169	37.9718	13.5169	37.9718	13.5169	37.9718	13.5169	37.9718	13.5169	123.977	13.5169	83.0464	13.5169	117.225
13.5336	95.1563	13.5336	30.6173	13.5336	30.6173	13.5336	30.6173	13.5336	30.6173	13.5336	30.6173	13.5336	30.6173	13.5336	30.6173	13.5336	126.472	13.5336	81.5661	13.5336	111.178
13.5503	93.9063	13.5503	37.3744	13.5503	37.3744	13.5503	37.3744	13.5503	37.3744	13.5503	37.3744	13.5503	37.3744	13.5503	37.3744	13.5503	126.94	13.5503	88.7643	13.5503	108.01
13.5669	108.906	13.5669	50.9181	13.5669	50.9181	13.5669	50.9181	13.5669	50.9181	13.5669	50.9181	13.5669	50.9181	13.5669	50.9181	13.5669	126.169	13.5669	88.2883	13.5669	119.086
13.5836	87.6564	13.5836	39.5948	13.5836	39.5948	13.5836	39.5948	13.5836	39.5948	13.5836	39.5948	13.5836	39.5948	13.5836	39.5948	13.5836	127.711	13.5836	86.7751	13.5836	124.483
13.6003	98.9064	13.6003	48.016	13.6003	48.016	13.6003	48.016	13.6003	48.016	13.6003	48.016	13.6003	48.016	13.6003	48.016	13.6003	124.61	13.6003	86.907	13.6003	117.643
13.6169	98.9064	13.6169	41.0849	13.6169	41.0849	13.6169	41.0849	13.6169	41.0849	13.6169	41.0849	13.6169	41.0849	13.6169	41.0849	13.6169	132.044	13.6169	95.028	13.6169	126.6
13.6336	102.656	13.6336	41.8157	13.6336	41.8157	13.6336	41.8157	13.6336	41.8157	13.6336	41.8157	13.6336	41.8157	13.6336	41.8157	13.6336	134.082	13.6336	88.1267	13.6336	124.818
13.6503	111.406	13.6503	51.6468	13.6503	51.6468	13.6503	51.6468	13.6503	51.6468	13.6503	51.6468	13.6503	51.6468	13.6503	51.6468	13.6503	124.101	13.6503	99.3425	13.6503	126.8
13.6669	101.406	13.6669	51.4091	13.6669	51.4091	13.6669	51.4091	13.6669	51.4091	13.6669	51.4091	13.6669	51.4091	13.6669	51.4091	13.6669	126.792	13.6669	99.3708	13.6669	124.628
13.6836	107.656	13.6836	47.328	13.6836	47.328	13.6836	47.328	13.6836	47.328	13.6836	47.328	13.6836	47.328	13.6836	47.328	13.6836	138.132	13.6836	99.5749	13.6836	122.009
13.7003	108.906	13.7003	42.4248	13.7003	42.4248	13.7003	42.4248	13.7003	42.4248	13.7003	42.4248	13.7003	42.4248	13.7003	42.4248	13.7003	133.471	13.7003	98.7344	13.7003	125.159
13.7169	100.156	13.7169	41.3593	13.7169	41.3593	13.7169	41.3593	13.7169	41.3593	13.7169	41.3593	13.7169	41.3593	13.7169	41.3593	13.7169	129.324	13.7169	105.981	13.7169	122.72
13.7336	113.906	13.7336	48.5185	13.7336	48.5185	13.7336	48.5185	13.7336	48.5185	13.7336	48.5185	13.7336	48.5185	13.7336	48.5185	13.7336	135.393	13.7336	115.158	13.7336	119.26
13.7503	110.156	13.7503	49.8619	13.7503	49.8619	13.7503	49.8619	13.7503	49.8619	13.7503	49.8619	13.7503	49.8619	13.7503	49.8619	13.7503	129.647	13.7503	103.951	13.7503	117.935
13.7669	115.156	13.7669	46.1912	13.7669	46.1912	13.7669	46.1912	13.7669	46.1912	13.7669	46.1912	13.7669	46.1912	13.7669	46.1912	13.7669	144.031	13.7669	112.086	13.7669	114.956
13.7836	113.906	13.7836	52.7671	13.7836	52.7671	13.7836	52.7671	13.7836	52.7671	13.7836	52.7671	13.7836	52.7671	13.7836	52.7671	13.7836	144.585	13.7836	105.121	13.7836	128.519
13.8003	120.156	13.8003	51.3085	13.8003	51.3085	13.8003	51.3085	13.8003	51.3085	13.8003	51.3085	13.8003	51.3085	13.8003	51.3085	13.8003	139.148	13.8003	112.365	13.8003	131.523
13.8169	121.406	13.8169	49.0652	13.8169	49.0652	13.8169	49.0652	13.8169	49.0652	13.8169	49.0652	13.8169	49.0652	13.8169	49.0652	13.8169	146.195	13.8169	113.61	13.8169	135.973
13.8336	120.156	13.8336	52.9223	13.8336	52.9223	13.8336	52.9223	13.8336	52.9223	13.8336	52.9223	13.8336	52.9223	13.8336	52.9223	13.8336	145.158	13.8336	116.039	13.8336	134.01
13.8503	120.156	13.8503	63.8481	13.8503	63.8481	13.8503	63.8481	13.8503	63.8481	13.8503	63.8481	13.8503	63.8481	13.8503	63.8481	13.8503	139.521	13.8503	115.112	13.8503	136.722
13.8669	122.656	13.8669	54.0729	13.8669	54.0729	13.8669	54.0729	13.8669	54.0729	13.8669	54.0729	13.8669	54.0729	13.8669	54.0729	13.8669	148.712	13.8669	118.87	13.8669	144.352
13.8836	125.156	13.8836	56.3895	13.8836	56.3895	13.8836	56.3895	13.8836	56.3895	13.8836	56.3895	13.8836	56.3895	13.8836	56.3895	13.8836	159.202	13.8836	112.252	13.8836	128.538
13.9003	120.156	13.9003	55.8203	13.9003	55.8203	13.9003	55.8203	13.9003	55.8203	13.9003	55.8203	13.9003	55.8203	13.9003	55.8203	13.9003	146.337	13.9003	118.143	13.9003	135.911
13.9169	120.157	13.9169	62.8177	13.9169	62.8177	13.9169	62.8177	13.9169	62.8177	13.9169	62.8177	13.9169	62.8177	13.9169	62.8177	13.9169	143.606	13.9169	118.833	13.9169	146.323
13.9336	116.407	13.9336	64.5136	13.9336	64.5136	13.9336	64.5136	13.9336	64.5136	13.9336	64.5136	13.9336	64.5136	13.9336	64.5136	13.9336	157.01	13.9336	129.74	13.9336	148.67
13.9503	132.657	13.9503	58.896	13.9503	58.896	13.9503	58.896	13.9503	58.896	13.9503	58.896	13.9503	58.896	13.9503	58.896	13.9503	159.282	13.9503	135.629	13.9503	147.914
13.9669	141.407	13.9669	66.2571	13.9669	66.2571	13.9669	66.2571	13.9669	66.2571	13.9669	66.2571	13.9669	66.2571	13.9669	66.2571	13.9669	147.159	13.9669	119.21	13.9669	143.915
13.9836	146.407	13.9836	60.8753	13.9836	60.8753	13.9836	60.8753	13.9836	60.8753	13.9836	60.8753	13.9836	60.8753	13.9836	60.8753	13.9836	161.595	13.9836	119.54	13.9836	150.003
14.0003	142.657	14.0003	63.3975	14.0003	63.3975	14.0003	63.3975	14.0003	63.3975	14.0003	63.3975	14.0003	63.3975	14.0003	63.3975	14.0003	163.261	14.0003	130.969	14.0003	138.555
14.0169	150.157	14.0169	74.9885	14.0169	74.9885	14.0169	74.9885	14.0169	74.9885	14.0169	74.9885	14.0169	74.9885	14.0169	74.9885	14.0169	147.75	14.0169	121.645	14.0169	150.812
14.0336	127.657	14.0336	60.8994	14.0336	60.8994	14.0336	60.8994	14.0336	60.8994	14.0336	60.8994	14.0336	60.8994	14.0336	60.8994	14.0336	157.132	14.0336	133.187	14.0336	147.48
14.0503	138.907	14.0503	62.6872	14.0503	62.6872	14.0503	62.6872	14.0503	62.6872	14.0503	62.6872	14.0503	62.6872	14.0503	62.6872	14.0503	153.388	14.0503	122.946	14.0503	144.425
14.0669	142.657	14.0669	74.6431	14.0669	74.6431	14.0669	74.6431	14.0669	74.6431	14.0669	74.6431	14.0669	74.6431	14.0669	74.6431	14.0669	160.881	14.0669	135.488	14.0669	165.494
14.0836	146.407	14.0836	77.0184	14.0836	77.0184	14.0836	77.0184	14.0836	77.0184	14.0836	77.0184	14.0836	77.0184	14.0836	77.0184	14.0836	154.412	14.0836	133.778	14.0836	152.96
14.1003	137.657	14.1003	72.719	14.1003	72.719	14.1003	72.719	14.1003	72.719	14.1003	72.719	14.1003	72.719	14.1003	72.719	14.1003	163.409	14.1003	134.776	14.1003	159.314
14.1169	150.157	14.1169	73.1953	14.1169	73.1953	14.1169	73.1953	14.1169	73.1953	14.1169	73.1953	14.1169	73.1953	14.1169	73.1953	14.1169	159.381	14.1169	139.184	14.1169	161.68
14.1336	135.157	14.1336	67.2938	14.1336	67.2938	14.1336	67.2938	14.1336	67.2938	14.1336	67.2938	14.1336	67.2938	14.1336	67.2938	14.1336	156.759	14.1336	132.846	14.1336	164.583
14.1503	143.907	14.1503	70.2018	14.1503	70.2018	14.1503	70.2018	14.1503	70.2018	14.1503	70.2018	14.1503	70.2018	14.1503	70.2018	14.1503	162.34	14.1503	133.578	14.1503	155.926
14.167	145.157	14.167	81.1192	14.167	81.1192	14.167	81.1192	14.167	81.1192	14.167	81.1192	14.167	81.1192	14.167	81.1192	14.167	165.316	14.167	130.527	14.167	163.552
14.1836	151.407	14.1836	80.6264	14.1836	80.6264	14.1836	80.6264	14.1836	80.6264	14.1836	80.6264	14.1836	80.6264	14.1836	80.6264	14.1836	167.093	14.1836	132.238	14.1836	172.3
14.2003	158.907	14.2003	81.1827	14.2003	81.1827	14.2003	81.1827	14.2003	81.1827	14.2003	81.1827	14.2003	81.1827	14.2003	81.1827	14.2003	163.785	14.2003	149.017	14.2003	161.058
14.217	155.157	14.217	82.9595	14.217	82.9595	14.217	82.9595	14.217	82.9595	14.217	82.9595	14.217	82.9595	14.217	82.9595	14.217	171.776	14.217	133.287	14.217	168.174
14.2336	165.157	14.2336	84.6326	14.2336	84.6326	14.2336	84.6326	14.2336	84.6326	14.2336	84.6326	14.2336	84.6326	14.2336	84.6326	14.2336	172.206	14.2336	136.308	14.2336	172.785
14.2503	162.657	14.2503	85.2462	14.2503	85.2462	14.2503	85.2462	14.2503	85.2462	14.2503	85.2462	14.2503	85.2462	14.2503	85.2462	14.2503	-3.32308	14.2503	136.791	14.2503	166.53
14.267	161.407	14.267	79.3715	14.267	79.3715	14.267	79.3715	14.267	79.3715	14.267	79.3715	14.267	79.3715	14.267	79.3715	14.267	1.86034	14.267	136.131	14.267	176.677
14.2836	161.407	14.2836	86.4326	14.2836	86.4326	14.2836	86.4326	14.2836	86.4326	14.2836	86.4326	14.2836	86.4326	14.2836	86.4326	14.2836	4.76422	14.2836	130.717	14.2836	180.715
14.3003	142.657	14.3003	86.3308	14.3003	86.3308	14.3003	86.3308	14.3003	86.3308	14.3003	86.3308	14.3003	86.3308	14.3003	86.3308	14.3003	5.57155	14.3003	143.022	14.3003	174.139
14.317	142.657	14.317	85.9558	14.317	85.9558	14.317	85.9558	14.317	85.9558	14.317	85.9558	14.317	85.9558	14.317	85.9558	14.317	5.67737	14.317	146.538	14.317	-1.1127
14.3336	162.657	14.3336	73.1311	14.3336	73.1311	14.3336	73.1311	14.3336	73.1311	14.3336	73.1311	14.3336	73.1311	14.3336	73.1311	14.3336	-0.703391	14.3336	146.295	14.3336	3.11783
14.3503	152.657	14.3503	88.3865	14.3503	88.3865	14.3503	88.3865	14.3503	88.3865	14.3503	88.3865	14.3503	88.3865	14.3503	88.3865	14.3503	7.05056	14.3503	146.066	14.3503	13.2792
14.367	157.657	14.367	79.693	14.367	79.693	14.367	79.693	14.367	79.693	14.367	79.693	14.367	79.693	14.367	79.693	14.367	-1.08381	14.367	148.736	14.367	12.4702
14.3836	147.657	14.3836	80.654	14.3836	80.654	14.3836	80.654	14.3836	80.654	14.3836	80.654	14.3836	80.654	14.3836	80.654	14.3836	12.3565	14.3836	158.306	14.3836	12.2284
14.4003	141.407	14.4003	77.6721	14.4003	77.6721	14.4003	77.6721	14.4003	77.6721	14.4003	77.6721	14.4003	77.6721	14.4003	77.6721	14.4003	4.33106	14.4003	147.873	14.4003	10.4513
14.417	155.157	14.417	79.236	14.417	79.236	14.417	79.236	14.417	79.236	14.417	79.236	14.417	79.236	14.417	79.236	14.417	9.68381	14.417	146.12	14.417	5.24147
14.4336	155.157	14.4336	86.6334	14.4336	86.6334	14.4336	86.6334	14.4336	86.6334	14.4336	86.6334	14.4336	86.6334	14.4336	86.6334	14.4336	8.04329	14.4336	168.245	14.4336	18.0625
14.4503	162.657	14.4503	86.691	14.4503	86.691	14.4503	86.691	14.4503	86.691	14.4503	86.691	14.4503	86.691	14.4503	86.691	14.4503	11.3492	14.4503	161.931	14.4503	8.94404
14.467	160.157	14.467	84.105	14.467	84.105	14.467	84.105	14.467	84.105	14.467	84.105	14.467	84.105	14.467	84.105	14.467	10.3262	14.467	162.099	14.467	13.013
14.4836	162.657	14.4836	88.1082	14.4836	88.1082	14.4836	88.1082	14.4836	88.1082	14.4836	88.1082	14.4836	88.1082	14.4836	88.1082	14.4836	16.4044	14.4836	165.973	14.4836	10.935
14.5003	145.157	14.5003	79.7936	14.5003	79.7936	14.5003	79.7936	14.5003	79.7936	14.5003	79.7936	14.5003	79.7936	14.5003	79.7936	14.5003	10.2402	14.5003	154.689	14.5003	21.2497
14.517	153.907	14.517	82.7886	14.517	82.7886	14.517	82.7886	14.517	82.7886	14.517	82.7886	14.517	82.7886	14.517	82.7886	14.517	13.5672	14.517	162.997	14.517	19.2844
14.5336	161.407	14.5336	87.6657	14.5336	87.6657	14.5336	87.6657	14.5336	87.6657	14.5336	87.6657	14.5336	87.6657	14.5336	87.6657	14.5336	14.6457	14.5336	150.707	14.5336	21.8378
14.5503	166.407	14.5503	86.3711	14.5503	86.3711	14.5503	86.3711	14.5503	86.3711	14.5503	86.3711	14.5503	86.3711	14.5503	86.3711	14.5503	17.5885	14.5503	167.318	14.5503	27.8397
14.567	158.907	14.567	86.1012	14.567	86.1012	14.567	86.1012	14.567	86.1012	14.567	86.1012	14.567	86.1012	14.567	86.1012	14.567	15.3656	14.567	153.903	14.567	34.1686
14.5836	160.157	14.5836	87.3392	14.5836	87.3392	14.5836	87.3392	14.5836	87.3392	14.5836	87.3392	14.5836	87.3392	14.5836	87.3392	14.5836	7.37188	14.5836	157.74	14.5836	43.5703
14.6003	155.157	14.6003	87.7264	14.6003	87.7264	14.6003	87.7264	14.6003	87.7264	14.6003	87.7264	14.6003	87.7264	14.6003	87.7264	14.6003	17.8695	14.6003	178.37	14.6003	34.3009
14.617	-2.3432	14.617	82.6807	14.617	82.6807	14.617	82.6807	14.617	82.6807	14.617	82.6807	14.617	82.6807	14.617	82.6807	14.617	25.159	14.617	168.123	14.617	32.4508
14.6336	-0.839766	14.6336	92.7225	14.6336	92.7225	14.6336	92.7225	14.6336	92.7225	14.6336	92.7225	14.6336	92.7225	14.6336	92.7225	14.6336	17.802	14.6336	163.745	14.6336	35.0734
14.6503	4.16024	14.6503	93.6488	14.6503	93.6488	14.6503	93.6488	14.6503	93.6488	14.6503	93.6488	14.6503	93.6488	14.6503	93.6488	14.6503	16.2246	14.6503	168.505	14.6503	37.3106
14.667	1.66025	14.667	88.8486	14.667	88.8486	14.667	88.8486	14.667	88.8486	14.667	88.8486	14.667	88.8486	14.667	88.8486	14.667	7.93522	14.667	170.387	14.667	33.8996
14.6836	1.66026	14.6836	85.0609	14.6836	85.0609	14.6836	85.0609	14.6836	85.0609	14.6836	85.0609	14.6836	85.0609	14.6836	85.0609	14.6836	28.4632	14.6836	165.844	14.6836	36.4155
14.7003	9.16026	14.7003	93.9652	14.7003	93.9652	14.7003	93.9652	14.7003	93.9652	14.7003	93.9652	14.7003	93.9652	14.7003	93.9652	14.7003	16.0048	14.7003	179.598	14.7003	33.292
14.717	-3.33973	14.717	100.995	14.717	100.995	14.717	100.995	14.717	100.995	14.717	100.995	14.717	100.995	14.717	100.995	14.717	13.1068	14.717	166.828	14.717	41.7061
14.7336	2.91028	14.7336	91.5863	14.7336	91.5863	14.7336	91.5863	14.7336	91.5863	14.7336	91.5863	14.7336	91.5863	14.7336	91.5863	14.7336	20.1931	14.7336	179.655	14.7336	41.2128
14.7503	-2.08972	14.7503	103.788	14.7503	103.788	14.7503	103.788	14.7503	103.788	14.7503	103.788	14.7503	103.788	14.7503	103.788	14.7503	25.2459	14.7503	175.701	14.7503	39.6137
14.767	6.66029	14.767	91.3338	14.767	91.3338	14.767	91.3338	14.767	91.3338	14.767	91.3338	14.767	91.3338	14.767	91.3338	14.767	21.6883	14.767	173.685	14.767	48.7257
14.7836	-0.839702	14.7836	94.254	14.7836	94.254	14.7836	94.254	14.7836	94.254	14.7836	94.254	14.7836	94.254	14.7836	94.254	14.7836	13.808	14.7836	7.79892	14.7836	45.2498
14.8003	0.410306	14.8003	95.8994	14.8003	95.8994	14.8003	95.8994	14.8003	95.8994	14.8003	95.8994	14.8003	95.8994	14.8003	95.8994	14.8003	12.009	14.8003	7.02189	14.8003	41.0346
14.817	-3.33969	14.817	99.8672	14.817	99.8672	14.817	99.8672	14.817	99.8672	14.817	99.8672	14.817	99.8672	14.817	99.8672	14.817	17.8349	14.817	4.65932	14.817	35.8969
14.8336	0.41032	14.8336	100.999	14.8336	100.999	14.8336	100.999	14.8336	100.999	14.8336	100.999	14.8336	100.999	14.8336	100.999	14.8336	22.1938	14.8336	5.66236	14.8336	33.215
14.8503	-5.83967	14.8503	97.7296	14.8503	97.7296	14.8503	97.7296	14.8503	97.7296	14.8503	97.7296	14.8503	97.7296	14.8503	97.7296	14.8503	21.4633	14.8503	0.142162	14.8503	43.7999
14.867	4.16033	14.867	101.702	14.867	101.702	14.867	101.702	14.867	101.702	14.867	101.702	14.867	101.702	14.867	101.702	14.867	22.0067	14.867	4.58866	14.867	28.7712
14.8836	11.6603	14.8836	103.708	14.8836	103.708	14.8836	103.708	14.8836	103.708	14.8836	103.708	14.8836	103.708	14.8836	103.708	14.8836	26.6784	14.8836	2.72299	14.8836	37.6209
14.9003	12.9103	14.9003	102.662	14.9003	102.662	14.9003	102.662	14.9003	102.662	14.9003	102.662	14.9003	102.662	14.9003	102.662	14.9003	27.4799	14.9003	5.34706	14.9003	43.3241
14.917	11.6604	14.917	98.892	14.917	98.892	14.917	98.892	14.917	98.892	14.917	98.892	14.917	98.892	14.917	98.892	14.917	26.3542	14.917	5.93505	14.917	37.6938
14.9336	14.1604	14.9336	100.677	14.9336	100.677	14.9336	100.677	14.9336	100.677	14.9336	100.677	14.9336	100.677	14.9336	100.677	14.9336	33.433	14.9336	10.251	14.9336	44.154
14.9503	14.1604	14.9503	104.02	14.9503	104.02	14.9503	104.02	14.9503	104.02	14.9503	104.02	14.9503	104.02	14.9503	104.02	14.9503	29.734	14.9503	1.44004	14.9503	41.6294
14.967	16.6604	14.967	93.7923	14.967	93.7923	14.967	93.7923	14.967	93.7923	14.967	93.7923	14.967	93.7923	14.967	93.7923	14.967	27.7563	14.967	6.09914	14.967	38.867
14.9836	7.91038	14.9836	102.586	14.9836	102.586	14.9836	102.586	14.9836	102.586	14.9836	102.586	14.9836	102.586	14.9836	102.586	14.9836	39.0391	14.9836	4.87966	14.9836	44.9269
15.0003	22.9104	15.0003	109.038	15.0003	109.038	15.0003	109.038	15.0003	109.038	15.0003	109.038	15.0003	109.038	15.0003	109.038	15.0003	33.215	15.0003	21.6461	15.0003	47.7781
15.017	6.6604	15.017	104.973	15.017	104.973	15.017	104.973	15.017	104.973	15.017	104.973	15.017	104.973	15.017	104.973	15.017	39.6426	15.017	6.31661	15.017	53.6312
15.0336	15.4104	15.0336	105.772	15.0336	105.772	15.0336	105.772	15.0336	105.772	15.0336	105.772	15.0336	105.772	15.0336	105.772	15.0336	31.9298	15.0336	14.2638	15.0336	48.4311
15.0503	26.6604	15.0503	102.867	15.0503	102.867	15.0503	102.867	15.0503	102.867	15.0503	102.867	15.0503	102.867	15.0503	102.867	15.0503	24.3684	15.0503	13.843	15.0503	41.5299
15.067	19.1604	15.067	103.592	15.067	103.592	15.067	103.592	15.067	103.592	15.067	103.592	15.067	103.592	15.067	103.592	15.067	33.2872	15.067	20.0469	15.067	50.2286
15.0836	17.9104	15.0836	96.1307	15.0836	96.1307	15.0836	96.1307	15.0836	96.1307	15.0836	96.1307	15.0836	96.1307	15.0836	96.1307	15.0836	26.9763	15.0836	24.0447	15.0836	53.7923
15.1003	21.6604	15.1003	101.614	15.1003	101.614	15.1003	101.614	15.1003	101.614	15.1003	101.614	15.1003	101.614	15.1003	101.614	15.1003	30.5812	15.1003	23.3928	15.1003	60.7208
15.117	17.9104	15.117	113.684	15.117	113.684	15.117	113.684	15.117	113.684	15.117	113.684	15.117	113.684	15.117	113.684	15.117	30.071	15.117	25.074	15.117	65.7149
15.1336	14.1604	15.1336	99.2545	15.1336	99.2545	15.1336	99.2545	15.1336	99.2545	15.1336	99.2545	15.1336	99.2545	15.1336	99.2545	15.1336	37.1571	15.1336	13.7903	15.1336	54.7078
15.1503	26.6605	15.1503	110.095	15.1503	110.095	15.1503	110.095	15.1503	110.095	15.1503	110.095	15.1503	110.095	15.1503	110.095	15.1503	42.3543	15.1503	15.9809	15.1503	65
15.167	27.9105	15.167	111.999	15.167	111.999	15.167	111.999	15.167	111.999	15.167	111.999	15.167	111.999	15.167	111.999	15.167	42.2674	15.167	16.4193	15.167	56.4665
15.1836	31.6605	15.1836	109.533	15.1836	109.533	15.1836	109.533	15.1836	109.533	15.1836	109.533	15.1836	109.533	15.1836	109.533	15.1836	41.6855	15.1836	16.2892	15.1836	58.1551
15.2003	31.6605	15.2003	109.241	15.2003	109.241	15.2003	109.241	15.2003	109.241	15.2003	109.241	15.2003	109.241	15.2003	109.241	15.2003	38.296	15.2003	18.4306	15.2003	60.6123
15.217	39.1605	15.217	114.176	15.217	114.176	15.217	114.176	15.217	114.176	15.217	114.176	15.217	114.176	15.217	114.176	15.217	38.5429	15.217	13.5085	15.217	60.9115
15.2336	40.4105	15.2336	122.452	15.2336	122.452	15.2336	122.452	15.2336	122.452	15.2336	122.452	15.2336	122.452	15.2336	122.452	15.2336	30.8261	15.2336	23.0268	15.2336	57.8634
15.2503	34.1605	15.2503	126.069	15.2503	126.069	15.2503	126.069	15.2503	126.069	15.2503	126.069	15.2503	126.069	15.2503	126.069	15.2503	41.8535	15.2503	30.9131	15.2503	54.1703
15.267	40.4105	15.267	114.668	15.267	114.668	15.267	114.668	15.267	114.668	15.267	114.668	15.267	114.668	15.267	114.668	15.267	37.922	15.267	12.9554	15.267	56.805
15.2836	31.6605	15.2836	125.413	15.2836	125.413	15.2836	125.413	15.2836	125.413	15.2836	125.413	15.2836	125.413	15.2836	125.413	15.2836	42.4545	15.2836	24.8537	15.2836	63.1605
15.3003	40.4105	15.3003	124.038	15.3003	124.038	15.3003	124.038	15.3003	124.038	15.3003	124.038	15.3003	124.038	15.3003	124.038	15.3003	34.3869	15.3003	29.2207	15.3003	64.96
15.317	35.4105	15.317	123.037	15.317	123.037	15.317	123.037	15.317	123.037	15.317	123.037	15.317	123.037	15.317	123.037	15.317	45.3131	15.317	20.8415	15.317	60.7288
15.3336	37.9105	15.3336	121.808	15.3336	121.808	15.3336	121.808	15.3336	121.808	15.3336	121.808	15.3336	121.808	15.3336	121.808	15.3336	32.1555	15.3336	28.5281	15.3336	73.6296
15.3503	49.1605	15.3503	117.512	15.3503	117.512	15.3503	117.512	15.3503	117.512	15.3503	117.512	15.3503	117.512	15.3503	117.512	15.3503	35.4019	15.3503	21.8179	15.3503	60.872
15.367	41.6605	15.367	120.76	15.367	120.76	15.367	120.76	15.367	120.76	15.367	120.76	15.367	120.76	15.367	120.76	15.367	40.2354	15.367	19.8353	15.367	66.1298
15.3836	45.4106	15.3836	128.347	15.3836	128.347	15.3836	128.347	15.3836	128.347	15.3836	128.347	15.3836	128.347	15.3836	128.347	15.3836	45.5277	15.3836	21.1967	15.3836	70.4648
15.4003	42.9106	15.4003	120.576	15.4003	120.576	15.4003	120.576	15.4003	120.576	15.4003	120.576	15.4003	120.576	15.4003	120.576	15.4003	40.2378	15.4003	25.2285	15.4003	71.452
15.417	42.9106	15.417	123.465	15.417	123.465	15.417	123.465	15.417	123.465	15.417	123.465	15.417	123.465	15.417	123.465	15.417	50.8955	15.417	29.7231	15.417	71.3594
15.4336	47.9106	15.4336	122.502	15.4336	122.502	15.4336	122.502	15.4336	122.502	15.4336	122.502	15.4336	122.502	15.4336	122.502	15.4336	56.337	15.4336	17.6527	15.4336	71.7362
15.4503	55.4106	15.4503	118.382	15.4503	118.382	15.4503	118.382	15.4503	118.382	15.4503	118.382	15.4503	118.382	15.4503	118.382	15.4503	54.2356	15.4503	20.2505	15.4503	77.4266
15.467	49.1606	15.467	132.312	15.467	132.312	15.467	132.312	15.467	132.312	15.467	132.312	15.467	132.312	15.467	132.312	15.467	50.0823	15.467	22.5486	15.467	57.5551
15.4836	70.4106	15.4836	123.539	15.4836	123.539	15.4836	123.539	15.4836	123.539	15.4836	123.539	15.4836	123.539	15.4836	123.539	15.4836	57.87	15.4836	26.7056	15.4836	66.1815
15.5003	64.1606	15.5003	131.242	15.5003	131.242	15.5003	131.242	15.5003	131.242	15.5003	131.242	15.5003	131.242	15.5003	131.242	15.5003	48.6858	15.5003	25.5483	15.5003	74.2469
15.517	46.6606	15.517	121.364	15.517	121.364	15.517	121.364	15.517	121.364	15.517	121.364	15.517	121.364	15.517	121.364	15.517	67.8461	15.517	25.5958	15.517	75.0437
15.5336	62.9106	15.5336	125.89	15.5336	125.89	15.5336	125.89	15.5336	125.89	15.5336	125.89	15.5336	125.89	15.5336	125.89	15.5336	58.4701	15.5336	33.0434	15.5336	70.1351
15.5503	56.6606	15.5503	127.527	15.5503	127.527	15.5503	127.527	15.5503	127.527	15.5503	127.527	15.5503	127.527	15.5503	127.527	15.5503	52.5047	15.5503	34.7913	15.5503	75.1939
15.567	70.4106	15.567	129.4	15.567	129.4	15.567	129.4	15.567	129.4	15.567	129.4	15.567	129.4	15.567	129.4	15.567	58.7727	15.567	44.3936	15.567	83.2638
15.5836	67.9106	15.5836	125.905	15.5836	125.905	15.5836	125.905	15.5836	125.905	15.5836	125.905	15.5836	125.905	15.5836	125.905	15.5836	59.0781	15.5836	33.813	15.5836	79.7082
15.6003	71.6607	15.6003	121.028	15.6003	121.028	15.6003	121.028	15.6003	121.028	15.6003	121.028	15.6003	121.028	15.6003	121.028	15.6003	68.3356	15.6003	37.3922	15.6003	79.5314
15.617	61.6607	15.617	137.562	15.617	137.562	15.617	137.562	15.617	137.562	15.617	137.562	15.617	137.562	15.617	137.562	15.617	67.7513	15.617	44.0817	15.617	82.0058
15.6336	71.6607	15.6336	130.148	15.6336	130.148	15.6336	130.148	15.6336	130.148	15.6336	130.148	15.6336	130.148	15.6336	130.148	15.6336	64.6778	15.6336	33.6949	15.6336	81.8981
15.6503	69.1607	15.6503	122.635	15.6503	122.635	15.6503	122.635	15.6503	122.635	15.6503	122.635	15.6503	122.635	15.6503	122.635	15.6503	65.6028	15.6503	40.542	15.6503	77.7645
15.667	81.6607	15.667	126.042	15.667	126.042	15.667	126.042	15.667	126.042	15.667	126.042	15.667	126.042	15.667	126.042	15.667	55.8657	15.667	37.2504	15.667	74.9468
15.6836	72.9107	15.6836	130.591	15.6836	130.591	15.6836	130.591	15.6836	130.591	15.6836	130.591	15.6836	130.591	15.6836	130.591	15.6836	73.3007	15.6836	34.5055	15.6836	83.1847
15.7003	76.6607	15.7003	135.477	15.7003	135.477	15.7003	135.477	15.7003	135.477	15.7003	135.477	15.7003	135.477	15.7003	135.477	15.7003	63.9961	15.7003	40.6288	15.7003	76.4979
15.717	74.1607	15.717	137.556	15.717	137.556	15.717	137.556	15.717	137.556	15.717	137.556	15.717	137.556	15.717	137.556	15.717	73.3021	15.717	40.3842	15.717	81.5018
15.7336	87.9107	15.7336	136.618	15.7336	136.618	15.7336	136.618	15.7336	136.618	15.7336	136.618	15.7336	136.618	15.7336	136.618	15.7336	73.4081	15.7336	40.6335	15.7336	78.8643
15.7503	64.1607	15.7503	130.38	15.7503	130.38	15.7503	130.38	15.7503	130.38	15.7503	130.38	15.7503	130.38	15.7503	130.38	15.7503	72.3385	15.7503	48.127	15.7503	75.4686
15.767	89.1607	15.767	141.648	15.767	141.648	15.767	141.648	15.767	141.648	15.767	141.648	15.767	141.648	15.767	141.648	15.767	75.7768	15.767	48.7902	15.767	80.2313
15.7836	86.6607	15.7836	148.984	15.7836	148.984	15.7836	148.984	15.7836	148.984	15.7836	148.984	15.7836	148.984	15.7836	148.984	15.7836	69.4527	15.7836	54.6196	15.7836	77.2236
15.8003	74.1607	15.8003	135.961	15.8003	135.961	15.8003	135.961	15.8003	135.961	15.8003	135.961	15.8003	135.961	15.8003	135.961	15.8003	63.4256	15.8003	41.5776	15.8003	84.0462
15.817	77.9107	15.817	137.161	15.817	137.161	15.817	137.161	15.817	137.161	15.817	137.161	15.817	137.161	15.817	137.161	15.817	74.3895	15.817	49.1932	15.817	79.625
15.8337	67.9108	15.8337	145.859	15.8337	145.859	15.8337	145.859	15.8337	145.859	15.8337	145.859	15.8337	145.859	15.8337	145.859	15.8337	66.3297	15.8337	39.8314	15.8337	79.3021
15.8503	87.9108	15.8503	143.39	15.8503	143.39	15.8503	143.39	15.8503	143.39	15.8503	143.39	15.8503	143.39	15.8503	143.39	15.8503	75.2584	15.8503	43.9371	15.8503	86.0491
15.867	81.6608	15.867	147.315	15.867	147.315	15.867	147.315	15.867	147.315	15.867	147.315	15.867	147.315	15.867	147.315	15.867	70.8658	15.867	50.1707	15.867	84.1642
15.8837	87.9108	15.8837	140.066	15.8837	140.066	15.8837	140.066	15.8837	140.066	15.8837	140.066	15.8837	140.066	15.8837	140.066	15.8837	78.1092	15.8837	51.2194	15.8837	88.4578
15.9003	80.4108	15.9003	148.772	15.9003	148.772	15.9003	148.772	15.9003	148.772	15.9003	148.772	15.9003	148.772	15.9003	148.772	15.9003	85.718	15.9003	46.3977	15.9003	88.9755
15.917	70.4108	15.917	153.183	15.917	153.183	15.917	153.183	15.917	153.183	15.917	153.183	15.917	153.183	15.917	153.183	15.917	83.7159	15.917	51.4477	15.917	87.6741
15.9337	81.6608	15.9337	138.078	15.9337	138.078	15.9337	138.078	15.9337	138.078	15.9337	138.078	15.9337	138.078	15.9337	138.078	15.9337	79.2387	15.9337	49.9541	15.9337	81.4244
15.9503	81.6608	15.9503	137.602	15.9503	137.602	15.9503	137.602	15.9503	137.602	15.9503	137.602	15.9503	137.602	15.9503	137.602	15.9503	76.4187	15.9503	56.3816	15.9503	88.3938
15.967	80.4108	15.967	141.119	15.967	141.119	15.967	141.119	15.967	141.119	15.967	141.119	15.967	141.119	15.967	141.119	15.967	87.0879	15.967	59.5452	15.967	88.066
15.9837	81.6608	15.9837	138.701	15.9837	138.701	15.9837	138.701	15.9837	138.701	15.9837	138.701	15.9837	138.701	15.9837	138.701	15.9837	77.9559	15.9837	57.9028	15.9837	76.9328
16.0003	89.1608	16.0003	149.281	16.0003	149.281	16.0003	149.281	16.0003	149.281	16.0003	149.281	16.0003	149.281	16.0003	149.281	16.0003	85.0979	16.0003	51.9308	16.0003	87.3438
16.017	85.4108	16.017	154.267	16.017	154.267	16.017	154.267	16.017	154.267	16.017	154.267	16.017	154.267	16.017	154.267	16.017	78.1166	16.017	56.2538	16.017	88.5802
16.0337	86.6608	16.0337	145.265	16.0337	145.265	16.0337	145.265	16.0337	145.265	16.0337	145.265	16.0337	145.265	16.0337	145.265	16.0337	77.4911	16.0337	61.2476	16.0337	75.9914
16.0503	72.9108	16.0503	154.155	16.0503	154.155	16.0503	154.155	16.0503	154.155	16.0503	154.155	16.0503	154.155	16.0503	154.155	16.0503	86.1894	16.0503	54.7881	16.0503	83.2932
16.067	82.9109	16.067	143.065	16.067	143.065	16.067	143.065	16.067	143.065	16.067	143.065	16.067	143.065	16.067	143.065	16.067	87.9878	16.067	53.527	16.067	85.0014
16.0837	85.4109	16.0837	149.488	16.0837	149.488	16.0837	149.488	16.0837	149.488	16.0837	149.488	16.0837	149.488	16.0837	149.488	16.0837	85.1252	16.0837	53.903	16.0837	87.642
16.1003	89.1609	16.1003	142.985	16.1003	142.985	16.1003	142.985	16.1003	142.985	16.1003	142.985	16.1003	142.985	16.1003	142.985	16.1003	76.163	16.1003	54.5412	16.1003	83.427
16.117	94.1609	16.117	146.515	16.117	146.515	16.117	146.515	16.117	146.515	16.117	146.515	16.117	146.515	16.117	146.515	16.117	78.1792	16.117	57.1722	16.117	84.8939
16.1337	92.9109	16.1337	151.875	16.1337	151.875	16.1337	151.875	16.1337	151.875	16.1337	151.875	16.1337	151.875	16.1337	151.875	16.1337	79.8361	16.1337	71.1429	16.1337	88.1762
16.1503	94.1609	16.1503	160.253	16.1503	160.253	16.1503	160.253	16.1503	160.253	16.1503	160.253	16.1503	160.253	16.1503	160.253	16.1503	81.1793	16.1503	57.4761	16.1503	81.7881
16.167	96.6609	16.167	168.609	16.167	168.609	16.167	168.609	16.167	168.609	16.167	168.609	16.167	168.609	16.167	168.609	16.167	80.828	16.167	57.8046	16.167	90.7094
16.1837	94.1609	16.1837	157.854	16.1837	157.854	16.1837	157.854	16.1837	157.854	16.1837	157.854	16.1837	157.854	16.1837	157.854	16.1837	85.9374	16.1837	58.6595	16.1837	90.308
16.2003	92.9109	16.2003	162.535	16.2003	162.535	16.2003	162.535	16.2003	162.535	16.2003	162.535	16.2003	162.535	16.2003	162.535	16.2003	84.0558	16.2003	63.6547	16.2003	85.5645
16.217	90.4109	16.217	156.008	16.217	156.008	16.217	156.008	16.217	156.008	16.217	156.008	16.217	156.008	16.217	156.008	16.217	78.1004	16.217	61.8973	16.217	85.1528
16.2337	86.6609	16.2337	152.112	16.2337	152.112	16.2337	152.112	16.2337	152.112	16.2337	152.112	16.2337	152.112	16.2337	152.112	16.2337	87.7245	16.2337	64.3668	16.2337	92.2889
16.2503	101.661	16.2503	153.986	16.2503	153.986	16.2503	153.986	16.2503	153.986	16.2503	153.986	16.2503	153.986	16.2503	153.986	16.2503	88.6722	16.2503	75.321	16.2503	81.9147
16.267	105.411	16.267	157.63	16.267	157.63	16.267	157.63	16.267	157.63	16.267	157.63	16.267	157.63	16.267	157.63	16.267	83.2534	16.267	69.7614	16.267	83.8716
16.2837	96.6609	16.2837	158.946	16.2837	158.946	16.2837	158.946	16.2837	158.946	16.2837	158.946	16.2837	158.946	16.2837	158.946	16.2837	83.8634	16.2837	58.0288	16.2837	92.1554
16.3003	107.911	16.3003	163.969	16.3003	163.969	16.3003	163.969	16.3003	163.969	16.3003	163.969	16.3003	163.969	16.3003	163.969	16.3003	92.9068	16.3003	72.5	16.3003	86.6825
16.317	102.911	16.317	159.179	16.317	159.179	16.317	159.179	16.317	159.179	16.317	159.179	16.317	159.179	16.317	159.179	16.317	87.8093	16.317	75.0956	16.317	91.5418
16.3337	105.411	16.3337	160.405	16.3337	160.405	16.3337	160.405	16.3337	160.405	16.3337	160.405	16.3337	160.405	16.3337	160.405	16.3337	86.8476	16.3337	77.3578	16.3337	86.1462
16.3503	97.911	16.3503	163.612	16.3503	163.612	16.3503	163.612	16.3503	163.612	16.3503	163.612	16.3503	163.612	16.3503	163.612	16.3503	90.0561	16.3503	75.3463	16.3503	79.8385
16.367	105.411	16.367	162.168	16.367	162.168	16.367	162.168	16.367	162.168	16.367	162.168	16.367	162.168	16.367	162.168	16.367	84.0961	16.367	70.0455	16.367	82.314
16.3837	106.661	16.3837	171.275	16.3837	171.275	16.3837	171.275	16.3837	171.275	16.3837	171.275	16.3837	171.275	16.3837	171.275	16.3837	89.7337	16.3837	75.6236	16.3837	82.6031
16.4003	105.411	16.4003	174.071	16.4003	174.071	16.4003	174.071	16.4003	174.071	16.4003	174.071	16.4003	174.071	16.4003	174.071	16.4003	90.3725	16.4003	77.566	16.4003	89.6497
16.417	110.411	16.417	170.077	16.417	170.077	16.417	170.077	16.417	170.077	16.417	170.077	16.417	170.077	16.417	170.077	16.417	92.5957	16.417	81.5552	16.417	91.7017
16.4337	120.411	16.4337	164.47	16.4337	164.47	16.4337	164.47	16.4337	164.47	16.4337	164.47	16.4337	164.47	16.4337	164.47	16.4337	87.4761	16.4337	88.3205	16.4337	76.4408
16.4503	110.411	16.4503	162.197	16.4503	162.197	16.4503	162.197	16.4503	162.197	16.4503	162.197	16.4503	162.197	16.4503	162.197	16.4503	89.9386	16.4503	83.8856	16.4503	83.9552
16.467	107.911	16.467	172.234	16.467	172.234	16.467	172.234	16.467	172.234	16.467	172.234	16.467	172.234	16.467	172.234	16.467	86.6558	16.467	78.6902	16.467	82.0707
16.4837	117.911	16.4837	166.473	16.4837	166.473	16.4837	166.473	16.4837	166.473	16.4837	166.473	16.4837	166.473	16.4837	166.473	16.4837	90.6085	16.4837	84.2924	16.4837	90.7666
16.5003	127.911	16.5003	173.052	16.5003	173.052	16.5003	173.052	16.5003	173.052	16.5003	173.052	16.5003	173.052	16.5003	173.052	16.5003	91.3266	16.5003	81.9997	16.5003	90.9356
16.517	120.411	16.517	167.407	16.517	167.407	16.517	167.407	16.517	167.407	16.517	167.407	16.517	167.407	16.517	167.407	16.517	91.8679	16.517	74.9561	16.517	81.2278
16.5337	127.911	16.5337	1.18615	16.5337	1.18615	16.5337	1.18615	16.5337	1.18615	16.5337	1.18615	16.5337	1.18615	16.5337	1.18615	16.5337	95.8313	16.5337	86.5406	16.5337	90.8958
16.5503	115.411	16.5503	6.17414	16.5503	6.17414	16.5503	6.17414	16.5503	6.17414	16.5503	6.17414	16.5503	6.17414	16.5503	6.17414	16.5503	97.6556	16.5503	83.6191	16.5503	77.9785
16.567	125.411	16.567	2.7396	16.567	2.7396	16.567	2.7396	16.567	2.7396	16.567	2.7396	16.567	2.7396	16.567	2.7396	16.567	94.6973	16.567	89.0466	16.567	80.0592
16.5837	124.161	16.5837	0.657054	16.5837	0.657054	16.5837	0.657054	16.5837	0.657054	16.5837	0.657054	16.5837	0.657054	16.5837	0.657054	16.5837	94.1308	16.5837	81.0332	16.5837	88.6719
16.6003	117.911	16.6003	13.1075	16.6003	13.1075	16.6003	13.1075	16.6003	13.1075	16.6003	13.1075	16.6003	13.1075	16.6003	13.1075	16.6003	103.632	16.6003	80.1516	16.6003	80.0055
16.617	119.161	16.617	2.20978	16.617	2.20978	16.617	2.20978	16.617	2.20978	16.617	2.20978	16.617	2.20978	16.617	2.20978	16.617	96.8881	16.617	83.2892	16.617	82.6299
16.6337	134.161	16.6337	8.5306	16.6337	8.5306	16.6337	8.5306	16.6337	8.5306	16.6337	8.5306	16.6337	8.5306	16.6337	8.5306	16.6337	94.8916	16.6337	90.2392	16.6337	80.0039
16.6503	124.161	16.6503	9.96888	16.6503	9.96888	16.6503	9.96888	16.6503	9.96888	16.6503	9.96888	16.6503	9.96888	16.6503	9.96888	16.6503	100.252	16.6503	84.142	16.6503	86.4145
16.667	120.411	16.667	4.44326	16.667	4.44326	16.667	4.44326	16.667	4.44326	16.667	4.44326	16.667	4.44326	16.667	4.44326	16.667	96.5687	16.667	82.8156	16.667	84.2883
16.6837	127.911	16.6837	8.77602	16.6837	8.77602	16.6837	8.77602	16.6837	8.77602	16.6837	8.77602	16.6837	8.77602	16.6837	8.77602	16.6837	104.942	16.6837	86.2388	16.6837	83.0498
16.7003	146.661	16.7003	9.15218	16.7003	9.15218	16.7003	9.15218	16.7003	9.15218	16.7003	9.15218	16.7003	9.15218	16.7003	9.15218	16.7003	97.2024	16.7003	96.2837	16.7003	87.5342
16.717	145.411	16.717	9.80791	16.717	9.80791	16.717	9.80791	16.717	9.80791	16.717	9.80791	16.717	9.80791	16.717	9.80791	16.717	98.7014	16.717	85.2513	16.717	79.2588
16.7337	131.661	16.7337	11.4377	16.7337	11.4377	16.7337	11.4377	16.7337	11.4377	16.7337	11.4377	16.7337	11.4377	16.7337	11.4377	16.7337	103.83	16.7337	86.6453	16.7337	83.3323
16.7503	141.661	16.7503	8.29823	16.7503	8.29823	16.7503	8.29823	16.7503	8.29823	16.7503	8.29823	16.7503	8.29823	16.7503	8.29823	16.7503	106.479	16.7503	85.7362	16.7503	95.4072
16.767	144.161	16.767	8.79477	16.767	8.79477	16.767	8.79477	16.767	8.79477	16.767	8.79477	16.767	8.79477	16.767	8.79477	16.767	104.648	16.767	90.466	16.767	85.4115
16.7837	140.411	16.7837	5.53188	16.7837	5.53188	16.7837	5.53188	16.7837	5.53188	16.7837	5.53188	16.7837	5.53188	16.7837	5.53188	16.7837	107.763	16.7837	81.1783	16.7837	84.8127
16.8003	144.161	16.8003	17.1718	16.8003	17.1718	16.8003	17.1718	16.8003	17.1718	16.8003	17.1718	16.8003	17.1718	16.8003	17.1718	16.8003	110.498	16.8003	92.2467	16.8003	89.5936
16.817	156.661	16.817	6.53402	16.817	6.53402	16.817	6.53402	16.817	6.53402	16.817	6.53402	16.817	6.53402	16.817	6.53402	16.817	117.379	16.817	98.6828	16.817	76.1284
16.8337	151.661	16.8337	18.7485	16.8337	18.7485	16.8337	18.7485	16.8337	18.7485	16.8337	18.7485	16.8337	18.7485	16.8337	18.7485	16.8337	112.832	16.8337	89.0372	16.8337	86.6068
16.8503	149.161	16.8503	16.0186	16.8503	16.0186	16.8503	16.0186	16.8503	16.0186	16.8503	16.0186	16.8503	16.0186	16.8503	16.0186	16.8503	124.716	16.8503	97.0617	16.8503	94.0254
16.867	147.911	16.867	7.60565	16.867	7.60565	16.867	7.60565	16.867	7.60565	16.867	7.60565	16.867	7.60565	16.867	7.60565	16.867	112.404	16.867	95.3577	16.867	93.0129
16.8837	155.411	16.8837	9.3513	16.8837	9.3513	16.8837	9.3513	16.8837	9.3513	16.8837	9.3513	16.8837	9.3513	16.8837	9.3513	16.8837	124.238	16.8837	99.7958	16.8837	85.0882
16.9003	149.161	16.9003	13.3455	16.9003	13.3455	16.9003	13.3455	16.9003	13.3455	16.9003	13.3455	16.9003	13.3455	16.9003	13.3455	16.9003	122.821	16.9003	92.0139	16.9003	76.2187
16.917	156.661	16.917	11.8996	16.917	11.8996	16.917	11.8996	16.917	11.8996	16.917	11.8996	16.917	11.8996	16.917	11.8996	16.917	124.106	16.917	103.631	16.917	89.7349
16.9337	149.161	16.9337	14.658	16.9337	14.658	16.9337	14.658	16.9337	14.658	16.9337	14.658	16.9337	14.658	16.9337	14.658	16.9337	120.935	16.9337	83.8597	16.9337	81.356
16.9503	149.161	16.9503	19.3347	16.9503	19.3347	16.9503	19.3347	16.9503	19.3347	16.9503	19.3347	16.9503	19.3347	16.9503	19.3347	16.9503	119.247	16.9503	93.4556	16.9503	90.1248
16.967	169.161	16.967	27.1703	16.967	27.1703	16.967	27.1703	16.967	27.1703	16.967	27.1703	16.967	27.1703	16.967	27.1703	16.967	122.079	16.967	89.8413	16.967	84.4106
16.9837	157.911	16.9837	14.8489	16.9837	14.8489	16.9837	14.8489	16.9837	14.8489	16.9837	14.8489	16.9837	14.8489	16.9837	14.8489	16.9837	129.629	16.9837	94.6413	16.9837	94.7255
17.0003	149.161	17.0003	32.0794	17.0003	32.0794	17.0003	32.0794	17.0003	32.0794	17.0003	32.0794	17.0003	32.0794	17.0003	32.0794	17.0003	123.736	17.0003	96.174	17.0003	88.7165
17.017	164.161	17.017	7.43538	17.017	7.43538	17.017	7.43538	17.017	7.43538	17.017	7.43538	17.017	7.43538	17.017	7.43538	17.017	127.585	17.017	95.7577	17.017	89.1104
17.0337	160.411	17.0337	17.0476	17.0337	17.0476	17.0337	17.0476	17.0337	17.0476	17.0337	17.0476	17.0337	17.0476	17.0337	17.0476	17.0337	127.465	17.0337	105.268	17.0337	86.8376
17.0503	165.411	17.0503	21.3407	17.0503	21.3407	17.0503	21.3407	17.0503	21.3407	17.0503	21.3407	17.0503	21.3407	17.0503	21.3407	17.0503	131.14	17.0503	85.3566	17.0503	79.9083
17.067	159.161	17.067	31.6502	17.067	31.6502	17.067	31.6502	17.067	31.6502	17.067	31.6502	17.067	31.6502	17.067	31.6502	17.067	123.131	17.067	98.0693	17.067	87.2029
17.0837	150.411	17.0837	27.2247	17.0837	27.2247	17.0837	27.2247	17.0837	27.2247	17.0837	27.2247	17.0837	27.2247	17.0837	27.2247	17.0837	120.134	17.0837	96.7515	17.0837	88.4546
17.1003	147.911	17.1003	24.8624	17.1003	24.8624	17.1003	24.8624	17.1003	24.8624	17.1003	24.8624	17.1003	24.8624	17.1003	24.8624	17.1003	133.978	17.1003	101.237	17.1003	96.2191
17.117	149.161	17.117	25.841	17.117	25.841	17.117	25.841	17.117	25.841	17.117	25.841	17.117	25.841	17.117	25.841	17.117	137.925	17.117	95.0962	17.117	91.1006
17.1337	144.161	17.1337	21.9151	17.1337	21.9151	17.1337	21.9151	17.1337	21.9151	17.1337	21.9151	17.1337	21.9151	17.1337	21.9151	17.1337	124.491	17.1337	92.693	17.1337	94.5066
17.1503	140.411	17.1503	17.329	17.1503	17.329	17.1503	17.329	17.1503	17.329	17.1503	17.329	17.1503	17.329	17.1503	17.329	17.1503	120.115	17.1503	99.676	17.1503	90.0028
17.167	145.411	17.167	29.255	17.167	29.255	17.167	29.255	17.167	29.255	17.167	29.255	17.167	29.255	17.167	29.255	17.167	125.291	17.167	92.7881	17.167	91.4476
17.1837	139.161	17.1837	30.5853	17.1837	30.5853	17.1837	30.5853	17.1837	30.5853	17.1837	30.5853	17.1837	30.5853	17.1837	30.5853	17.1837	132.406	17.1837	92.7667	17.1837	90.4436
17.2003	147.911	17.2003	31.9227	17.2003	31.9227	17.2003	31.9227	17.2003	31.9227	17.2003	31.9227	17.2003	31.9227	17.2003	31.9227	17.2003	129.804	17.2003	92.8087	17.2003	96.7924
17.217	145.411	17.217	28.0206	17.217	28.0206	17.217	28.0206	17.217	28.0206	17.217	28.0206	17.217	28.0206	17.217	28.0206	17.217	121.552	17.217	98.7005	17.217	100.984
17.2337	145.411	17.2337	34.3431	17.2337	34.3431	17.2337	34.3431	17.2337	34.3431	17.2337	34.3431	17.2337	34.3431	17.2337	34.3431	17.2337	143.122	17.2337	99.836	17.2337	89.0901
17.2503	155.411	17.2503	38.7027	17.2503	38.7027	17.2503	38.7027	17.2503	38.7027	17.2503	38.7027	17.2503	38.7027	17.2503	38.7027	17.2503	139.501	17.2503	96.2189	17.2503	96.4852
17.267	131.661	17.267	27.1901	17.267	27.1901	17.267	27.1901	17.267	27.1901	17.267	27.1901	17.267	27.1901	17.267	27.1901	17.267	130.585	17.267	87.8056	17.267	94.6748
17.2837	126.661	17.2837	31.4924	17.2837	31.4924	17.2837	31.4924	17.2837	31.4924	17.2837	31.4924	17.2837	31.4924	17.2837	31.4924	17.2837	131.841	17.2837	99.9532	17.2837	92.5624
17.3003	122.911	17.3003	33.7524	17.3003	33.7524	17.3003	33.7524	17.3003	33.7524	17.3003	33.7524	17.3003	33.7524	17.3003	33.7524	17.3003	133.173	17.3003	103.283	17.3003	100.731
17.317	-3.83049	17.317	29.1944	17.317	29.1944	17.317	29.1944	17.317	29.1944	17.317	29.1944	17.317	29.1944	17.317	29.1944	17.317	139.254	17.317	101.395	17.317	90.0336
17.3337	6.16951	17.3337	39.7987	17.3337	39.7987	17.3337	39.7987	17.3337	39.7987	17.3337	39.7987	17.3337	39.7987	17.3337	39.7987	17.3337	133.097	17.3337	117.572	17.3337	93.0941
17.3503	-2.58048	17.3503	42.4584	17.3503	42.4584	17.3503	42.4584	17.3503	42.4584	17.3503	42.4584	17.3503	42.4584	17.3503	42.4584	17.3503	137.138	17.3503	107.634	17.3503	85.094
17.367	-2.58047	17.367	38.5603	17.367	38.5603	17.367	38.5603	17.367	38.5603	17.367	38.5603	17.367	38.5603	17.367	38.5603	17.367	136.328	17.367	96.9712	17.367	102.087
17.3837	2.41954	17.3837	40.5922	17.3837	40.5922	17.3837	40.5922	17.3837	40.5922	17.3837	40.5922	17.3837	40.5922	17.3837	40.5922	17.3837	142.846	17.3837	101.276	17.3837	90.2524
17.4003	2.41954	17.4003	40.5135	17.4003	40.5135	17.4003	40.5135	17.4003	40.5135	17.4003	40.5135	17.4003	40.5135	17.4003	40.5135	17.4003	153.527	17.4003	116.135	17.4003	100.493
17.417	-6.33045	17.417	40.9936	17.417	40.9936	17.417	40.9936	17.417	40.9936	17.417	40.9936	17.417	40.9936	17.417	40.9936	17.417	149.431	17.417	109.819	17.417	90.7761
17.4337	-3.83044	17.4337	32.5499	17.4337	32.5499	17.4337	32.5499	17.4337	32.5499	17.4337	32.5499	17.4337	32.5499	17.4337	32.5499	17.4337	147.163	17.4337	109.474	17.4337	96.1124
17.4503	-2.58044	17.4503	43.2355	17.4503	43.2355	17.4503	43.2355	17.4503	43.2355	17.4503	43.2355	17.4503	43.2355	17.4503	43.2355	17.4503	150.279	17.4503	124.832	17.4503	92.8092
17.467	-5.08043	17.467	34.8851	17.467	34.8851	17.467	34.8851	17.467	34.8851	17.467	34.8851	17.467	34.8851	17.467	34.8851	17.467	154.942	17.467	109.447	17.467	103.555
17.4837	-0.0804211	17.4837	47.1957	17.4837	47.1957	17.4837	47.1957	17.4837	47.1957	17.4837	47.1957	17.4837	47.1957	17.4837	47.1957	17.4837	148.903	17.4837	120.137	17.4837	103.224
17.5004	-6.33041	17.5004	50.852	17.5004	50.852	17.5004	50.852	17.5004	50.852	17.5004	50.852	17.5004	50.852	17.5004	50.852	17.5004	160.508	17.5004	112.915	17.5004	96.8826
17.517	-0.0804068	17.517	42.7584	17.517	42.7584	17.517	42.7584	17.517	42.7584	17.517	42.7584	17.517	42.7584	17.517	42.7584	17.517	152.726	17.517	116.531	17.517	99.3902
17.5337	3.6696	17.5337	48.0453	17.5337	48.0453	17.5337	48.0453	17.5337	48.0453	17.5337	48.0453	17.5337	48.0453	17.5337	48.0453	17.5337	170.932	17.5337	121.454	17.5337	108.187
17.5504	-5.08039	17.5504	43.8777	17.5504	43.8777	17.5504	43.8777	17.5504	43.8777	17.5504	43.8777	17.5504	43.8777	17.5504	43.8777	17.5504	157.77	17.5504	119.788	17.5504	100.06
17.567	1.16961	17.567	44.9444	17.567	44.9444	17.567	44.9444	17.567	44.9444	17.567	44.9444	17.567	44.9444	17.567	44.9444	17.567	160.908	17.567	132.345	17.567	106.859
17.5837	-1.33038	17.5837	48.0472	17.5837	48.0472	17.5837	48.0472	17.5837	48.0472	17.5837	48.0472	17.5837	48.0472	17.5837	48.0472	17.5837	157.035	17.5837	126.465	17.5837	106.181
17.6004	-1.33037	17.6004	49.7072	17.6004	49.7072	17.6004	49.7072	17.6004	49.7072	17.6004	49.7072	17.6004	49.7072	17.6004	49.7072	17.6004	161.945	17.6004	135.708	17.6004	100.436
17.617	3.66964	17.617	50.5434	17.617	50.5434	17.617	50.5434	17.617	50.5434	17.617	50.5434	17.617	50.5434	17.617	50.5434	17.617	168.67	17.617	114.75	17.617	108.057
17.6337	6.16964	17.6337	51.1145	17.6337	51.1145	17.6337	51.1145	17.6337	51.1145	17.6337	51.1145	17.6337	51.1145	17.6337	51.1145	17.6337	170.41	17.6337	130.459	17.6337	112.814
17.6504	7.41965	17.6504	45.0492	17.6504	45.0492	17.6504	45.0492	17.6504	45.0492	17.6504	45.0492	17.6504	45.0492	17.6504	45.0492	17.6504	163.61	17.6504	115.807	17.6504	115.122
17.667	4.91966	17.667	49.8368	17.667	49.8368	17.667	49.8368	17.667	49.8368	17.667	49.8368	17.667	49.8368	17.667	49.8368	17.667	173.233	17.667	123.638	17.667	113.714
17.6837	9.91966	17.6837	55.6462	17.6837	55.6462	17.6837	55.6462	17.6837	55.6462	17.6837	55.6462	17.6837	55.6462	17.6837	55.6462	17.6837	1.79126	17.6837	129.866	17.6837	117.513
17.7004	13.6697	17.7004	54.6808	17.7004	54.6808	17.7004	54.6808	17.7004	54.6808	17.7004	54.6808	17.7004	54.6808	17.7004	54.6808	17.7004	9.58473	17.7004	126.32	17.7004	114.695
17.717	7.41968	17.717	66.0375	17.717	66.0375	17.717	66.0375	17.717	66.0375	17.717	66.0375	17.717	66.0375	17.717	66.0375	17.717	0.151777	17.717	127.151	17.717	118.825
17.7337	13.6697	17.7337	53.9222	17.7337	53.9222	17.7337	53.9222	17.7337	53.9222	17.7337	53.9222	17.7337	53.9222	17.7337	53.9222	17.7337	2.65996	17.7337	125.583	17.7337	122.015
17.7504	7.41969	17.7504	61.1133	17.7504	61.1133	17.7504	61.1133	17.7504	61.1133	17.7504	61.1133	17.7504	61.1133	17.7504	61.1133	17.7504	7.06705	17.7504	124.906	17.7504	124.083
17.767	11.1697	17.767	53.9579	17.767	53.9579	17.767	53.9579	17.767	53.9579	17.767	53.9579	17.767	53.9579	17.767	53.9579	17.767	4.61687	17.767	131.855	17.767	119.998
17.7837	21.1697	17.7837	56.6349	17.7837	56.6349	17.7837	56.6349	17.7837	56.6349	17.7837	56.6349	17.7837	56.6349	17.7837	56.6349	17.7837	12.1675	17.7837	125.871	17.7837	130.68
17.8004	13.6697	17.8004	56.7075	17.8004	56.7075	17.8004	56.7075	17.8004	56.7075	17.8004	56.7075	17.8004	56.7075	17.8004	56.7075	17.8004	7.00377	17.8004	121.003	17.8004	127.043
17.817	12.4197	17.817	63.9716	17.817	63.9716	17.817	63.9716	17.817	63.9716	17.817	63.9716	17.817	63.9716	17.817	63.9716	17.817	8.3501	17.817	123.853	17.817	130.152
17.8337	19.9197	17.8337	62.1343	17.8337	62.1343	17.8337	62.1343	17.8337	62.1343	17.8337	62.1343	17.8337	62.1343	17.8337	62.1343	17.8337	12.0301	17.8337	122.672	17.8337	119.699
17.8504	21.1697	17.8504	62.5958	17.8504	62.5958	17.8504	62.5958	17.8504	62.5958	17.8504	62.5958	17.8504	62.5958	17.8504	62.5958	17.8504	12.3393	17.8504	121.941	17.8504	125.633
17.867	22.4197	17.867	72.3399	17.867	72.3399	17.867	72.3399	17.867	72.3399	17.867	72.3399	17.867	72.3399	17.867	72.3399	17.867	4.71845	17.867	131.37	17.867	125.544
17.8837	13.6698	17.8837	66.6365	17.8837	66.6365	17.8837	66.6365	17.8837	66.6365	17.8837	66.6365	17.8837	66.6365	17.8837	66.6365	17.8837	6.06448	17.8837	135.558	17.8837	137.403
17.9004	19.9198	17.9004	51.4227	17.9004	51.4227	17.9004	51.4227	17.9004	51.4227	17.9004	51.4227	17.9004	51.4227	17.9004	51.4227	17.9004	24.0696	17.9004	138.743	17.9004	126.291
17.917	33.6698	17.917	52.7603	17.917	52.7603	17.917	52.7603	17.917	52.7603	17.917	52.7603	17.917	52.7603	17.917	52.7603	17.917	8.49892	17.917	131.375	17.917	128.938
17.9337	33.6698	17.9337	65.3796	17.9337	65.3796	17.9337	65.3796	17.9337	65.3796	17.9337	65.3796	17.9337	65.3796	17.9337	65.3796	17.9337	17.8624	17.9337	141.828	17.9337	134.537
17.9504	34.9198	17.9504	63.9403	17.9504	63.9403	17.9504	63.9403	17.9504	63.9403	17.9504	63.9403	17.9504	63.9403	17.9504	63.9403	17.9504	14.6332	17.9504	143.182	17.9504	138.441
17.967	28.6698	17.967	60.1884	17.967	60.1884	17.967	60.1884	17.967	60.1884	17.967	60.1884	17.967	60.1884	17.967	60.1884	17.967	15.0511	17.967	128.006	17.967	139.186
17.9837	27.4198	17.9837	72.6616	17.9837	72.6616	17.9837	72.6616	17.9837	72.6616	17.9837	72.6616	17.9837	72.6616	17.9837	72.6616	17.9837	19.0651	17.9837	150.854	17.9837	135.745
18.0004	32.4198	18.0004	65.9286	18.0004	65.9286	18.0004	65.9286	18.0004	65.9286	18.0004	65.9286	18.0004	65.9286	18.0004	65.9286	18.0004	18.1721	18.0004	143.257	18.0004	139.564
18.017	38.6698	18.017	65.727	18.017	65.727	18.017	65.727	18.017	65.727	18.017	65.727	18.017	65.727	18.017	65.727	18.017	8.04125	18.017	143.952	18.017	133.495
18.0337	29.9198	18.0337	73.9447	18.0337	73.9447	18.0337	73.9447	18.0337	73.9447	18.0337	73.9447	18.0337	73.9447	18.0337	73.9447	18.0337	24.7558	18.0337	144.933	18.0337	140.172
18.0504	17.4198	18.0504	72.6861	18.0504	72.6861	18.0504	72.6861	18.0504	72.6861	18.0504	72.6861	18.0504	72.6861	18.0504	72.6861	18.0504	30.3913	18.0504	134.872	18.0504	140.232
18.067	32.4198	18.067	69.8774	18.067	69.8774	18.067	69.8774	18.067	69.8774	18.067	69.8774	18.067	69.8774	18.067	69.8774	18.067	12.0393	18.067	152.889	18.067	144.967
18.0837	38.6698	18.0837	68.8439	18.0837	68.8439	18.0837	68.8439	18.0837	68.8439	18.0837	68.8439	18.0837	68.8439	18.0837	68.8439	18.0837	12.9894	18.0837	148.687	18.0837	146.796
18.1004	36.1698	18.1004	73.1265	18.1004	73.1265	18.1004	73.1265	18.1004	73.1265	18.1004	73.1265	18.1004	73.1265	18.1004	73.1265	18.1004	30.2322	18.1004	148.725	18.1004	144.864
18.117	42.4198	18.117	66.9517	18.117	66.9517	18.117	66.9517	18.117	66.9517	18.117	66.9517	18.117	66.9517	18.117	66.9517	18.117	27.9124	18.117	145.719	18.117	143.274
18.1337	52.4199	18.1337	71.0461	18.1337	71.0461	18.1337	71.0461	18.1337	71.0461	18.1337	71.0461	18.1337	71.0461	18.1337	71.0461	18.1337	20.3254	18.1337	151.736	18.1337	150.669
18.1504	42.4199	18.1504	71.5718	18.1504	71.5718	18.1504	71.5718	18.1504	71.5718	18.1504	71.5718	18.1504	71.5718	18.1504	71.5718	18.1504	17.0173	18.1504	144.728	18.1504	147.62
18.167	36.1699	18.167	76.7712	18.167	76.7712	18.167	76.7712	18.167	76.7712	18.167	76.7712	18.167	76.7712	18.167	76.7712	18.167	33.7733	18.167	154.859	18.167	147.591
18.1837	44.9199	18.1837	75.4459	18.1837	75.4459	18.1837	75.4459	18.1837	75.4459	18.1837	75.4459	18.1837	75.4459	18.1837	75.4459	18.1837	26.4071	18.1837	152.47	18.1837	148.063
18.2004	38.6699	18.2004	74.1609	18.2004	74.1609	18.2004	74.1609	18.2004	74.1609	18.2004	74.1609	18.2004	74.1609	18.2004	74.1609	18.2004	14.0633	18.2004	160.316	18.2004	163.446
18.217	49.9199	18.217	75.2793	18.217	75.2793	18.217	75.2793	18.217	75.2793	18.217	75.2793	18.217	75.2793	18.217	75.2793	18.217	23.3942	18.217	146.4	18.217	141.282
18.2337	41.1699	18.2337	68.3748	18.2337	68.3748	18.2337	68.3748	18.2337	68.3748	18.2337	68.3748	18.2337	68.3748	18.2337	68.3748	18.2337	21.4352	18.2337	161.336	18.2337	154.153
18.2504	44.9199	18.2504	75.2668	18.2504	75.2668	18.2504	75.2668	18.2504	75.2668	18.2504	75.2668	18.2504	75.2668	18.2504	75.2668	18.2504	25.5954	18.2504	151.269	18.2504	158.191
18.267	43.6699	18.267	83.4769	18.267	83.4769	18.267	83.4769	18.267	83.4769	18.267	83.4769	18.267	83.4769	18.267	83.4769	18.267	26.6861	18.267	163.392	18.267	147.084
18.2837	41.1699	18.2837	79.1361	18.2837	79.1361	18.2837	79.1361	18.2837	79.1361	18.2837	79.1361	18.2837	79.1361	18.2837	79.1361	18.2837	26.4179	18.2837	158.688	18.2837	162.914
18.3004	38.6699	18.3004	76.4216	18.3004	76.4216	18.3004	76.4216	18.3004	76.4216	18.3004	76.4216	18.3004	76.4216	18.3004	76.4216	18.3004	21.431	18.3004	150.681	18.3004	165.703
18.317	44.9199	18.317	91.6795	18.317	91.6795	18.317	91.6795	18.317	91.6795	18.317	91.6795	18.317	91.6795	18.317	91.6795	18.317	36.0464	18.317	151.307	18.317	162
18.3337	39.9199	18.3337	82.8824	18.3337	82.8824	18.3337	82.8824	18.3337	82.8824	18.3337	82.8824	18.3337	82.8824	18.3337	82.8824	18.3337	23.9588	18.3337	158.393	18.3337	157.524
18.3504	44.92	18.3504	80.6099	18.3504	80.6099	18.3504	80.6099	18.3504	80.6099	18.3504	80.6099	18.3504	80.6099	18.3504	80.6099	18.3504	33.6292	18.3504	154.794	18.3504	155.467
18.367	51.17	18.367	84.3616	18.367	84.3616	18.367	84.3616	18.367	84.3616	18.367	84.3616	18.367	84.3616	18.367	84.3616	18.367	29.2739	18.367	152.339	18.367	160.932
18.3837	53.67	18.3837	86.6442	18.3837	86.6442	18.3837	86.6442	18.3837	86.6442	18.3837	86.6442	18.3837	86.6442	18.3837	86.6442	18.3837	31.8379	18.3837	155.589	18.3837	151.625
18.4004	53.67	18.4004	78.354	18.4004	78.354	18.4004	78.354	18.4004	78.354	18.4004	78.354	18.4004	78.354	18.4004	78.354	18.4004	32.1597	18.4004	158.613	18.4004	160.169
18.417	51.17	18.417	74.1921	18.417	74.1921	18.417	74.1921	18.417	74.1921	18.417	74.1921	18.417	74.1921	18.417	74.1921	18.417	39.6315	18.417	161.362	18.417	155.724
18.4337	52.42	18.4337	80.4372	18.4337	80.4372	18.4337	80.4372	18.4337	80.4372	18.4337	80.4372	18.4337	80.4372	18.4337	80.4372	18.4337	31.6833	18.4337	167.148	18.4337	154.843
18.4504	52.42	18.4504	87.7697	18.4504	87.7697	18.4504	87.7697	18.4504	87.7697	18.4504	87.7697	18.4504	87.7697	18.4504	87.7697	18.4504	39.5365	18.4504	155.353	18.4504	159.159
18.467	63.67	18.467	85.4328	18.467	85.4328	18.467	85.4328	18.467	85.4328	18.467	85.4328	18.467	85.4328	18.467	85.4328	18.467	39.8848	18.467	159.793	18.467	163.222
18.4837	58.67	18.4837	77.9184	18.4837	77.9184	18.4837	77.9184	18.4837	77.9184	18.4837	77.9184	18.4837	77.9184	18.4837	77.9184	18.4837	29.5585	18.4837	160.724	18.4837	160.577
18.5004	64.92	18.5004	89.1827	18.5004	89.1827	18.5004	89.1827	18.5004	89.1827	18.5004	89.1827	18.5004	89.1827	18.5004	89.1827	18.5004	33.9651	18.5004	160.496	18.5004	173.748
18.517	64.92	18.517	85.6011	18.517	85.6011	18.517	85.6011	18.517	85.6011	18.517	85.6011	18.517	85.6011	18.517	85.6011	18.517	29.6722	18.517	166.961	18.517	175.472
18.5337	63.67	18.5337	92.8226	18.5337	92.8226	18.5337	92.8226	18.5337	92.8226	18.5337	92.8226	18.5337	92.8226	18.5337	92.8226	18.5337	36.9834	18.5337	166.881	18.5337	3.05493
18.5504	62.42	18.5504	88.8866	18.5504	88.8866	18.5504	88.8866	18.5504	88.8866	18.5504	88.8866	18.5504	88.8866	18.5504	88.8866	18.5504	35.2682	18.5504	170.218	18.5504	-4.76736
18.567	68.67	18.567	86.9247	18.567	86.9247	18.567	86.9247	18.567	86.9247	18.567	86.9247	18.567	86.9247	18.567	86.9247	18.567	47.6477	18.567	165.791	18.567	5.11145
18.5837	61.1701	18.5837	89.7807	18.5837	89.7807	18.5837	89.7807	18.5837	89.7807	18.5837	89.7807	18.5837	89.7807	18.5837	89.7807	18.5837	34.8027	18.5837	159.019	18.5837	12.904
18.6004	67.4201	18.6004	89.3701	18.6004	89.3701	18.6004	89.3701	18.6004	89.3701	18.6004	89.3701	18.6004	89.3701	18.6004	89.3701	18.6004	35.9982	18.6004	157.049	18.6004	4.1678
18.617	76.1701	18.617	81.3679	18.617	81.3679	18.617	81.3679	18.617	81.3679	18.617	81.3679	18.617	81.3679	18.617	81.3679	18.617	34.9833	18.617	172.785	18.617	5.07083
18.6337	79.9201	18.6337	105.092	18.6337	105.092	18.6337	105.092	18.6337	105.092	18.6337	105.092	18.6337	105.092	18.6337	105.092	18.6337	41.2357	18.6337	174.514	18.6337	-3.91513
18.6504	73.6701	18.6504	96.6466	18.6504	96.6466	18.6504	96.6466	18.6504	96.6466	18.6504	96.6466	18.6504	96.6466	18.6504	96.6466	18.6504	38.1671	18.6504	176.759	18.6504	5.65927
18.667	72.4201	18.667	93.4441	18.667	93.4441	18.667	93.4441	18.667	93.4441	18.667	93.4441	18.667	93.4441	18.667	93.4441	18.667	43.1173	18.667	1.00765	18.667	9.16645
18.6837	72.4201	18.6837	92.7152	18.6837	92.7152	18.6837	92.7152	18.6837	92.7152	18.6837	92.7152	18.6837	92.7152	18.6837	92.7152	18.6837	44.5476	18.6837	5.43032	18.6837	20.287
18.7004	79.9201	18.7004	96.3368	18.7004	96.3368	18.7004	96.3368	18.7004	96.3368	18.7004	96.3368	18.7004	96.3368	18.7004	96.3368	18.7004	54.9535	18.7004	1.42111	18.7004	20.4709
18.717	77.4201	18.717	98.6679	18.717	98.6679	18.717	98.6679	18.717	98.6679	18.717	98.6679	18.717	98.6679	18.717	98.6679	18.717	53.3951	18.717	5.26004	18.717	16.2969
18.7337	82.4201	18.7337	90.9194	18.7337	90.9194	18.7337	90.9194	18.7337	90.9194	18.7337	90.9194	18.7337	90.9194	18.7337	90.9194	18.7337	52.3278	18.7337	0.969003	18.7337	16.9468
18.7504	79.9201	18.7504	101.299	18.7504	101.299	18.7504	101.299	18.7504	101.299	18.7504	101.299	18.7504	101.299	18.7504	101.299	18.7504	42.4525	18.7504	11.5413	18.7504	13.94
18.767	72.4201	18.767	93.7134	18.767	93.7134	18.767	93.7134	18.767	93.7134	18.767	93.7134	18.767	93.7134	18.767	93.7134	18.767	54.7897	18.767	3.93015	18.767	16.6272
18.7837	82.4201	18.7837	96.2667	18.7837	96.2667	18.7837	96.2667	18.7837	96.2667	18.7837	96.2667	18.7837	96.2667	18.7837	96.2667	18.7837	53.5322	18.7837	4.6046	18.7837	11.3119
18.8004	84.9201	18.8004	98.3993	18.8004	98.3993	18.8004	98.3993	18.8004	98.3993	18.8004	98.3993	18.8004	98.3993	18.8004	98.3993	18.8004	54.4029	18.8004	9.00943	18.8004	11.461
18.817	72.4202	18.817	97.5252	18.817	97.5252	18.817	97.5252	18.817	97.5252	18.817	97.5252	18.817	97.5252	18.817	97.5252	18.817	52.4836	18.817	12.1967	18.817	25.5348
18.8337	57.4202	18.8337	94.031	18.8337	94.031	18.8337	94.031	18.8337	94.031	18.8337	94.031	18.8337	94.031	18.8337	94.031	18.8337	52.1108	18.8337	20.0451	18.8337	15.0859
18.8504	58.6702	18.8504	91.8375	18.8504	91.8375	18.8504	91.8375	18.8504	91.8375	18.8504	91.8375	18.8504	91.8375	18.8504	91.8375	18.8504	58.8451	18.8504	20.103	18.8504	22.3971
18.867	61.1702	18.867	100.034	18.867	100.034	18.867	100.034	18.867	100.034	18.867	100.034	18.867	100.034	18.867	100.034	18.867	49.6637	18.867	31.7443	18.867	18.3253
18.8837	61.1702	18.8837	102.247	18.8837	102.247	18.8837	102.247	18.8837	102.247	18.8837	102.247	18.8837	102.247	18.8837	102.247	18.8837	57.1907	18.8837	28.7416	18.8837	26.2573
18.9004	64.9202	18.9004	100.035	18.9004	100.035	18.9004	100.035	18.9004	100.035	18.9004	100.035	18.9004	100.035	18.9004	100.035	18.9004	66.1468	18.9004	21.5567	18.9004	19.6777
18.917	68.6702	18.917	105.346	18.917	105.346	18.917	105.346	18.917	105.346	18.917	105.346	18.917	105.346	18.917	105.346	18.917	56.0758	18.917	22.1876	18.917	25.3718
18.9337	73.6702	18.9337	105.647	18.9337	105.647	18.9337	105.647	18.9337	105.647	18.9337	105.647	18.9337	105.647	18.9337	105.647	18.9337	64.6781	18.9337	27.8703	18.9337	20.4319
18.9504	76.1702	18.9504	98.3415	18.9504	98.3415	18.9504	98.3415	18.9504	98.3415	18.9504	98.3415	18.9504	98.3415	18.9504	98.3415	18.9504	68.1344	18.9504	7.69307	18.9504	27.1076
18.967	69.9202	18.967	103.394	18.967	103.394	18.967	103.394	18.967	103.394	18.967	103.394	18.967	103.394	18.967	103.394	18.967	61.7513	18.967	20.7451	18.967	25.7538
18.9837	74.9202	18.9837	107.136	18.9837	107.136	18.9837	107.136	18.9837	107.136	18.9837	107.136	18.9837	107.136	18.9837	107.136	18.9837	69.6496	18.9837	18.2828	18.9837	24.6192
19.0004	77.4202	19.0004	113.85	19.0004	113.85	19.0004	113.85	19.0004	113.85	19.0004	113.85	19.0004	113.85	19.0004	113.85	19.0004	71.7223	19.0004	21.4992	19.0004	26.7816
19.017	74.9202	19.017	106.807	19.017	106.807	19.017	106.807	19.017	106.807	19.017	106.807	19.017	106.807	19.017	106.807	19.017	64.446	19.017	16.4764	19.017	17.9233
19.0337	68.6702	19.0337	104.238	19.0337	104.238	19.0337	104.238	19.0337	104.238	19.0337	104.238	19.0337	104.238	19.0337	104.238	19.0337	73.5085	19.0337	29.9638	19.0337	17.1197
19.0504	64.9202	19.0504	108.749	19.0504	108.749	19.0504	108.749	19.0504	108.749	19.0504	108.749	19.0504	108.749	19.0504	108.749	19.0504	67.6173	19.0504	30.6063	19.0504	20.2905
19.067	72.4203	19.067	110.364	19.067	110.364	19.067	110.364	19.067	110.364	19.067	110.364	19.067	110.364	19.067	110.364	19.067	61.8957	19.067	33.8021	19.067	38.5777
19.0837	78.6703	19.0837	110.378	19.0837	110.378	19.0837	110.378	19.0837	110.378	19.0837	110.378	19.0837	110.378	19.0837	110.378	19.0837	70.9615	19.0837	27.5943	19.0837	37.1807
19.1004	82.4203	19.1004	105.532	19.1004	105.532	19.1004	105.532	19.1004	105.532	19.1004	105.532	19.1004	105.532	19.1004	105.532	19.1004	69.0862	19.1004	20.1814	19.1004	23.974
19.117	84.9203	19.117	120.917	19.117	120.917	19.117	120.917	19.117	120.917	19.117	120.917	19.117	120.917	19.117	120.917	19.117	68.2423	19.117	31.1736	19.117	18.1972
19.1337	88.6703	19.1337	117.381	19.1337	117.381	19.1337	117.381	19.1337	117.381	19.1337	117.381	19.1337	117.381	19.1337	117.381	19.1337	67.253	19.1337	37.6996	19.1337	35.6022
19.1504	91.1703	19.1504	113.322	19.1504	113.322	19.1504	113.322	19.1504	113.322	19.1504	113.322	19.1504	113.322	19.1504	113.322	19.1504	70.8126	19.1504	35.2417	19.1504	27.4596
19.167	87.4203	19.167	113.986	19.167	113.986	19.167	113.986	19.167	113.986	19.167	113.986	19.167	113.986	19.167	113.986	19.167	76.8384	19.167	32.5427	19.167	28.2829
19.1837	89.9203	19.1837	122.902	19.1837	122.902	19.1837	122.902	19.1837	122.902	19.1837	122.902	19.1837	122.902	19.1837	122.902	19.1837	69.195	19.1837	34.5153	19.1837	29.8498
19.2004	88.6703	19.2004	124.187	19.2004	124.187	19.2004	124.187	19.2004	124.187	19.2004	124.187	19.2004	124.187	19.2004	124.187	19.2004	75.9673	19.2004	44.6007	19.2004	35.3198
19.2171	84.9203	19.2171	118.38	19.2171	118.38	19.2171	118.38	19.2171	118.38	19.2171	118.38	19.2171	118.38	19.2171	118.38	19.2171	79.3163	19.2171	44.4724	19.2171	42.2351
19.2337	94.9203	19.2337	126.713	19.2337	126.713	19.2337	126.713	19.2337	126.713	19.2337	126.713	19.2337	126.713	19.2337	126.713	19.2337	77.5411	19.2337	37.495	19.2337	46.0983
19.2504	89.9203	19.2504	126.731	19.2504	126.731	19.2504	126.731	19.2504	126.731	19.2504	126.731	19.2504	126.731	19.2504	126.731	19.2504	84.4001	19.2504	41.7336	19.2504	31.8561
19.2671	84.9203	19.2671	125.795	19.2671	125.795	19.2671	125.795	19.2671	125.795	19.2671	125.795	19.2671	125.795	19.2671	125.795	19.2671	80.7837	19.2671	35.4309	19.2671	39.7511
19.2837	92.4203	19.2837	118.56	19.2837	118.56	19.2837	118.56	19.2837	118.56	19.2837	118.56	19.2837	118.56	19.2837	118.56	19.2837	73.858	19.2837	40.6125	19.2837	44.5159
19.3004	84.9204	19.3004	130.233	19.3004	130.233	19.3004	130.233	19.3004	130.233	19.3004	130.233	19.3004	130.233	19.3004	130.233	19.3004	83.202	19.3004	42.0219	19.3004	36.8158
19.3171	98.6704	19.3171	122.72	19.3171	122.72	19.3171	122.72	19.3171	122.72	19.3171	122.72	19.3171	122.72	19.3171	122.72	19.3171	75.0863	19.3171	38.4184	19.3171	39.9979
19.3337	93.6704	19.3337	127.137	19.3337	127.137	19.3337	127.137	19.3337	127.137	19.3337	127.137	19.3337	127.137	19.3337	127.137	19.3337	77.4476	19.3337	51.5041	19.3337	50.1516
19.3504	93.6704	19.3504	137.991	19.3504	137.991	19.3504	137.991	19.3504	137.991	19.3504	137.991	19.3504	137.991	19.3504	137.991	19.3504	76.1005	19.3504	42.7225	19.3504	44.5075
19.3671	98.6704	19.3671	117.784	19.3671	117.784	19.3671	117.784	19.3671	117.784	19.3671	117.784	19.3671	117.784	19.3671	117.784	19.3671	87.2891	19.3671	37.2623	19.3671	52.7359
19.3837	92.4204	19.3837	134.48	19.3837	134.48	19.3837	134.48	19.3837	134.48	19.3837	134.48	19.3837	134.48	19.3837	134.48	19.3837	75.3088	19.3837	29.2832	19.3837	48.7625
19.4004	109.92	19.4004	131.733	19.4004	131.733	19.4004	131.733	19.4004	131.733	19.4004	131.733	19.4004	131.733	19.4004	131.733	19.4004	88.1916	19.4004	42.3473	19.4004	43.8198
19.4171	109.92	19.4171	124.574	19.4171	124.574	19.4171	124.574	19.4171	124.574	19.4171	124.574	19.4171	124.574	19.4171	124.574	19.4171	80.078	19.4171	51.6967	19.4171	54.9846
19.4337	99.9204	19.4337	131.299	19.4337	131.299	19.4337	131.299	19.4337	131.299	19.4337	131.299	19.4337	131.299	19.4337	131.299	19.4337	88.0219	19.4337	46.4204	19.4337	59.5833
19.4504	103.67	19.4504	133.14	19.4504	133.14	19.4504	133.14	19.4504	133.14	19.4504	133.14	19.4504	133.14	19.4504	133.14	19.4504	87.6604	19.4504	40.6316	19.4504	49.1889
19.4671	94.9204	19.4671	128.53	19.4671	128.53	19.4671	128.53	19.4671	128.53	19.4671	128.53	19.4671	128.53	19.4671	128.53	19.4671	83.8625	19.4671	52.9374	19.4671	54.6684
19.4837	88.6704	19.4837	131.636	19.4837	131.636	19.4837	131.636	19.4837	131.636	19.4837	131.636	19.4837	131.636	19.4837	131.636	19.4837	97.5548	19.4837	58.9903	19.4837	67.4857
19.5004	92.4204	19.5004	132.957	19.5004	132.957	19.5004	132.957	19.5004	132.957	19.5004	132.957	19.5004	132.957	19.5004	132.957	19.5004	85.2014	19.5004	52.9488	19.5004	55.0447
19.5171	97.4205	19.5171	136.303	19.5171	136.303	19.5171	136.303	19.5171	136.303	19.5171	136.303	19.5171	136.303	19.5171	136.303	19.5171	89.8608	19.5171	54.8113	19.5171	59.9741
19.5337	98.6705	19.5337	135.129	19.5337	135.129	19.5337	135.129	19.5337	135.129	19.5337	135.129	19.5337	135.129	19.5337	135.129	19.5337	83.4908	19.5337	53.4788	19.5337	48.5668
19.5504	89.9205	19.5504	139.527	19.5504	139.527	19.5504	139.527	19.5504	139.527	19.5504	139.527	19.5504	139.527	19.5504	139.527	19.5504	88.2753	19.5504	50.7082	19.5504	54.1688
19.5671	101.17	19.5671	134.086	19.5671	134.086	19.5671	134.086	19.5671	134.086	19.5671	134.086	19.5671	134.086	19.5671	134.086	19.5671	91.0088	19.5671	53.785	19.5671	53.7537
19.5837	93.6705	19.5837	131.033	19.5837	131.033	19.5837	131.033	19.5837	131.033	19.5837	131.033	19.5837	131.033	19.5837	131.033	19.5837	93.2613	19.5837	49.6073	19.5837	50.1769
19.6004	97.4205	19.6004	132.3	19.6004	132.3	19.6004	132.3	19.6004	132.3	19.6004	132.3	19.6004	132.3	19.6004	132.3	19.6004	78.4943	19.6004	53.0704	19.6004	43.6587
19.6171	108.67	19.6171	133.851	19.6171	133.851	19.6171	133.851	19.6171	133.851	19.6171	133.851	19.6171	133.851	19.6171	133.851	19.6171	95.0404	19.6171	47.8934	19.6171	56.0647
19.6337	99.9205	19.6337	144.309	19.6337	144.309	19.6337	144.309	19.6337	144.309	19.6337	144.309	19.6337	144.309	19.6337	144.309	19.6337	82.6365	19.6337	49.8649	19.6337	55.9633
19.6504	98.6705	19.6504	141.586	19.6504	141.586	19.6504	141.586	19.6504	141.586	19.6504	141.586	19.6504	141.586	19.6504	141.586	19.6504	77.7391	19.6504	54.0501	19.6504	48.0246
19.6671	98.6705	19.6671	141.001	19.6671	141.001	19.6671	141.001	19.6671	141.001	19.6671	141.001	19.6671	141.001	19.6671	141.001	19.6671	85.6497	19.6671	59.7535	19.6671	62.4335
19.6837	112.421	19.6837	135.565	19.6837	135.565	19.6837	135.565	19.6837	135.565	19.6837	135.565	19.6837	135.565	19.6837	135.565	19.6837	85.2841	19.6837	43.3191	19.6837	56.9244
19.7004	104.921	19.7004	146.941	19.7004	146.941	19.7004	146.941	19.7004	146.941	19.7004	146.941	19.7004	146.941	19.7004	146.941	19.7004	92.4084	19.7004	58.4797	19.7004	61.8449
19.7171	114.921	19.7171	152.546	19.7171	152.546	19.7171	152.546	19.7171	152.546	19.7171	152.546	19.7171	152.546	19.7171	152.546	19.7171	93.8562	19.7171	58.3788	19.7171	66.5547
19.7337	116.171	19.7337	152.344	19.7337	152.344	19.7337	152.344	19.7337	152.344	19.7337	152.344	19.7337	152.344	19.7337	152.344	19.7337	88.3006	19.7337	51.1921	19.7337	64.0323
19.7504	104.921	19.7504	155.091	19.7504	155.091	19.7504	155.091	19.7504	155.091	19.7504	155.091	19.7504	155.091	19.7504	155.091	19.7504	85.5387	19.7504	60.1895	19.7504	63.4275
19.7671	117.421	19.7671	146.747	19.7671	146.747	19.7671	146.747	19.7671	146.747	19.7671	146.747	19.7671	146.747	19.7671	146.747	19.7671	89.8088	19.7671	47.794	19.7671	57.1652
19.7837	103.671	19.7837	143.35	19.7837	143.35	19.7837	143.35	19.7837	143.35	19.7837	143.35	19.7837	143.35	19.7837	143.35	19.7837	95.2986	19.7837	58.0831	19.7837	60.2133
19.8004	114.921	19.8004	143.736	19.8004	143.736	19.8004	143.736	19.8004	143.736	19.8004	143.736	19.8004	143.736	19.8004	143.736	19.8004	94.3955	19.8004	49.8893	19.8004	71.5891
19.8171	107.421	19.8171	141.118	19.8171	141.118	19.8171	141.118	19.8171	141.118	19.8171	141.118	19.8171	141.118	19.8171	141.118	19.8171	94.9866	19.8171	63.6878	19.8171	66.6978
19.8337	101.171	19.8337	158.61	19.8337	158.61	19.8337	158.61	19.8337	158.61	19.8337	158.61	19.8337	158.61	19.8337	158.61	19.8337	86.4881	19.8337	55.0374	19.8337	75.0253
19.8504	109.921	19.8504	154.104	19.8504	154.104	19.8504	154.104	19.8504	154.104	19.8504	154.104	19.8504	154.104	19.8504	154.104	19.8504	94.8844	19.8504	56.4294	19.8504	77.3504
19.8671	102.421	19.8671	137.793	19.8671	137.793	19.8671	137.793	19.8671	137.793	19.8671	137.793	19.8671	137.793	19.8671	137.793	19.8671	83.0163	19.8671	64.8354	19.8671	76.8436
19.8837	119.921	19.8837	156.707	19.8837	156.707	19.8837	156.707	19.8837	156.707	19.8837	156.707	19.8837	156.707	19.8837	156.707	19.8837	93.1505	19.8837	73.0688	19.8837	67.8548
19.9004	126.171	19.9004	157.588	19.9004	157.588	19.9004	157.588	19.9004	157.588	19.9004	157.588	19.9004	157.588	19.9004	157.588	19.9004	96.0905	19.9004	72.893	19.9004	74.8037
19.9171	134.921	19.9171	156.974	19.9171	156.974	19.9171	156.974	19.9171	156.974	19.9171	156.974	19.9171	156.974	19.9171	156.974	19.9171	91.8304	19.9171	68.1434	19.9171	76.2808
19.9337	121.171	19.9337	153.316	19.9337	153.316	19.9337	153.316	19.9337	153.316	19.9337	153.316	19.9337	153.316	19.9337	153.316	19.9337	98.958	19.9337	72.4637	19.9337	72.4525
19.9504	121.171	19.9504	155.779	19.9504	155.779	19.9504	155.779	19.9504	155.779	19.9504	155.779	19.9504	155.779	19.9504	155.779	19.9504	99.7789	19.9504	73.3923	19.9504	78.7276
19.9671	132.421	19.9671	150.689	19.9671	150.689	19.9671	150.689	19.9671	150.689	19.9671	150.689	19.9671	150.689	19.9671	150.689	19.9671	96.2328	19.9671	70.1397	19.9671	74.9988
19.9837	121.171	19.9837	154.313	19.9837	154.313	19.9837	154.313	19.9837	154.313	19.9837	154.313	19.9837	154.313	19.9837	154.313	19.9837	95.7296	19.9837	72.2544	19.9837	68.1226
20.0004	129.921	20.0004	166.519	20.0004	166.519	20.0004	166.519	20.0004	166.519	20.0004	166.519	20.0004	166.519	20.0004	166.519	20.0004	97.694	20.0004	75.9944	20.0004	71.6903
20.0171	123.671	20.0171	158.589	20.0171	158.589	20.0171	158.589	20.0171	158.589	20.0171	158.589	20.0171	158.589	20.0171	158.589	20.0171	99.0224	20.0171	85.6141	20.0171	70.9476
20.0337	128.671	20.0337	164.752	20.0337	164.752	20.0337	164.752	20.0337	164.752	20.0337	164.752	20.0337	164.752	20.0337	164.752	20.0337	95.6232	20.0337	75.785	20.0337	76.4638
20.0504	142.421	20.0504	166.218	20.0504	166.218	20.0504	166.218	20.0504	166.218	20.0504	166.218	20.0504	166.218	20.0504	166.218	20.0504	95.686	20.0504	71.0936	20.0504	87.6981
20.0671	138.671	20.0671	154.976	20.0671	154.976	20.0671	154.976	20.0671	154.976	20.0671	154.976	20.0671	154.976	20.0671	154.976	20.0671	100.237	20.0671	86.8129	20.0671	81.7785
20.0837	137.421	20.0837	160.547	20.0837	160.547	20.0837	160.547	20.0837	160.547	20.0837	160.547	20.0837	160.547	20.0837	160.547	20.0837	95.4397	20.0837	77.6887	20.0837	85.1304
20.1004	136.171	20.1004	163.684	20.1004	163.684	20.1004	163.684	20.1004	163.684	20.1004	163.684	20.1004	163.684	20.1004	163.684	20.1004	95.0267	20.1004	78.3957	20.1004	79.4811
20.1171	136.171	20.1171	164.002	20.1171	164.002	20.1171	164.002	20.1171	164.002	20.1171	164.002	20.1171	164.002	20.1171	164.002	20.1171	95.5631	20.1171	82.8676	20.1171	79.3522
20.1337	143.671	20.1337	169.492	20.1337	169.492	20.1337	169.492	20.1337	169.492	20.1337	169.492	20.1337	169.492	20.1337	169.492	20.1337	103.851	20.1337	88.5482	20.1337	91.9989
20.1504	136.171	20.1504	173.15	20.1504	173.15	20.1504	173.15	20.1504	173.15	20.1504	173.15	20.1504	173.15	20.1504	173.15	20.1504	98.0626	20.1504	79.2164	20.1504	75.364
20.1671	153.671	20.1671	163.128	20.1671	163.128	20.1671	163.128	20.1671	163.128	20.1671	163.128	20.1671	163.128	20.1671	163.128	20.1671	95.1732	20.1671	88.115	20.1671	86.9219
20.1837	148.671	20.1837	164.393	20.1837	164.393	20.1837	164.393	20.1837	164.393	20.1837	164.393	20.1837	164.393	20.1837	164.393	20.1837	100.874	20.1837	88.9993	20.1837	85.584
20.2004	142.421	20.2004	161.506	20.2004	161.506	20.2004	161.506	20.2004	161.506	20.2004	161.506	20.2004	161.506	20.2004	161.506	20.2004	103.513	20.2004	84.2323	20.2004	78.4915
20.2171	154.921	20.2171	161.513	20.2171	161.513	20.2171	161.513	20.2171	161.513	20.2171	161.513	20.2171	161.513	20.2171	161.513	20.2171	99.8866	20.2171	79.947	20.2171	85.1896
20.2337	144.921	20.2337	167.201	20.2337	167.201	20.2337	167.201	20.2337	167.201	20.2337	167.201	20.2337	167.201	20.2337	167.201	20.2337	98.93	20.2337	81.8967	20.2337	88.4735
20.2504	146.171	20.2504	165.304	20.2504	165.304	20.2504	165.304	20.2504	165.304	20.2504	165.304	20.2504	165.304	20.2504	165.304	20.2504	101.698	20.2504	83.5389	20.2504	88.3603
20.2671	147.421	20.2671	171.223	20.2671	171.223	20.2671	171.223	20.2671	171.223	20.2671	171.223	20.2671	171.223	20.2671	171.223	20.2671	106.194	20.2671	90.6361	20.2671	90.7461
20.2837	162.421	20.2837	177.255	20.2837	177.255	20.2837	177.255	20.2837	177.255	20.2837	177.255	20.2837	177.255	20.2837	177.255	20.2837	103.8	20.2837	82.9197	20.2837	83.9328
20.3004	159.921	20.3004	-1.10049	20.3004	-1.10049	20.3004	-1.10049	20.3004	-1.10049	20.3004	-1.10049	20.3004	-1.10049	20.3004	-1.10049	20.3004	109.601	20.3004	85.1655	20.3004	85.3957
20.3171	159.921	20.3171	9.10684	20.3171	9.10684	20.3171	9.10684	20.3171	9.10684	20.3171	9.10684	20.3171	9.10684	20.3171	9.10684	20.3171	104.78	20.3171	90.7042	20.3171	76.5112
20.3337	162.421	20.3337	0.447014	20.3337	0.447014	20.3337	0.447014	20.3337	0.447014	20.3337	0.447014	20.3337	0.447014	20.3337	0.447014	20.3337	122.899	20.3337	80.7883	20.3337	96.4401
20.3504	144.921	20.3504	-0.393189	20.3504	-0.393189	20.3504	-0.393189	20.3504	-0.393189	20.3504	-0.393189	20.3504	-0.393189	20.3504	-0.393189	20.3504	115.478	20.3504	88.1281	20.3504	78.2532
20.3671	144.921	20.3671	17.1212	20.3671	17.1212	20.3671	17.1212	20.3671	17.1212	20.3671	17.1212	20.3671	17.1212	20.3671	17.1212	20.3671	119.497	20.3671	95.5985	20.3671	83.4915
20.3837	149.921	20.3837	3.90697	20.3837	3.90697	20.3837	3.90697	20.3837	3.90697	20.3837	3.90697	20.3837	3.90697	20.3837	3.90697	20.3837	123.153	20.3837	87.2514	20.3837	94.427
20.4004	149.921	20.4004	7.97268	20.4004	7.97268	20.4004	7.97268	20.4004	7.97268	20.4004	7.97268	20.4004	7.97268	20.4004	7.97268	20.4004	120.812	20.4004	100.092	20.4004	86.439
20.4171	151.171	20.4171	5.46412	20.4171	5.46412	20.4171	5.46412	20.4171	5.46412	20.4171	5.46412	20.4171	5.46412	20.4171	5.46412	20.4171	111.634	20.4171	96.764	20.4171	92.2191
20.4337	167.421	20.4337	5.87861	20.4337	5.87861	20.4337	5.87861	20.4337	5.87861	20.4337	5.87861	20.4337	5.87861	20.4337	5.87861	20.4337	124.023	20.4337	98.2475	20.4337	82.0387
20.4504	168.671	20.4504	6.69984	20.4504	6.69984	20.4504	6.69984	20.4504	6.69984	20.4504	6.69984	20.4504	6.69984	20.4504	6.69984	20.4504	107.864	20.4504	103.023	20.4504	79.1555
20.4671	163.671	20.4671	-0.57149	20.4671	-0.57149	20.4671	-0.57149	20.4671	-0.57149	20.4671	-0.57149	20.4671	-0.57149	20.4671	-0.57149	20.4671	130.844	20.4671	99.5144	20.4671	92.9599
20.4837	159.921	20.4837	8.81123	20.4837	8.81123	20.4837	8.81123	20.4837	8.81123	20.4837	8.81123	20.4837	8.81123	20.4837	8.81123	20.4837	117.868	20.4837	99.0522	20.4837	87.6006
20.5004	163.671	20.5004	6.52213	20.5004	6.52213	20.5004	6.52213	20.5004	6.52213	20.5004	6.52213	20.5004	6.52213	20.5004	6.52213	20.5004	119.157	20.5004	102.444	20.5004	84.1167
20.5171	151.171	20.5171	12.4822	20.5171	12.4822	20.5171	12.4822	20.5171	12.4822	20.5171	12.4822	20.5171	12.4822	20.5171	12.4822	20.5171	133.168	20.5171	95.1876	20.5171	81.5759
20.5337	156.171	20.5337	13.0347	20.5337	13.0347	20.5337	13.0347	20.5337	13.0347	20.5337	13.0347	20.5337	13.0347	20.5337	13.0347	20.5337	140.399	20.5337	97.8991	20.5337	95.1877
20.5504	152.421	20.5504	2.99238	20.5504	2.99238	20.5504	2.99238	20.5504	2.99238	20.5504	2.99238	20.5504	2.99238	20.5504	2.99238	20.5504	126.629	20.5504	101.048	20.5504	85.9871
20.5671	168.671	20.5671	6.23606	20.5671	6.23606	20.5671	6.23606	20.5671	6.23606	20.5671	6.23606	20.5671	6.23606	20.5671	6.23606	20.5671	138.103	20.5671	89.6059	20.5671	84.2361
20.5837	144.921	20.5837	9.48413	20.5837	9.48413	20.5837	9.48413	20.5837	9.48413	20.5837	9.48413	20.5837	9.48413	20.5837	9.48413	20.5837	132.638	20.5837	93.2071	20.5837	86.3489
20.6004	151.171	20.6004	13.1881	20.6004	13.1881	20.6004	13.1881	20.6004	13.1881	20.6004	13.1881	20.6004	13.1881	20.6004	13.1881	20.6004	127.066	20.6004	107.053	20.6004	84.0434
20.6171	152.421	20.6171	14.5651	20.6171	14.5651	20.6171	14.5651	20.6171	14.5651	20.6171	14.5651	20.6171	14.5651	20.6171	14.5651	20.6171	123.814	20.6171	101.25	20.6171	80.8254
20.6337	144.921	20.6337	9.19268	20.6337	9.19268	20.6337	9.19268	20.6337	9.19268	20.6337	9.19268	20.6337	9.19268	20.6337	9.19268	20.6337	131.743	20.6337	93.085	20.6337	88.1199
20.6504	6.95645	20.6504	6.96307	20.6504	6.96307	20.6504	6.96307	20.6504	6.96307	20.6504	6.96307	20.6504	6.96307	20.6504	6.96307	20.6504	133.536	20.6504	99.0193	20.6504	86.4801
20.6671	4.45646	20.6671	23.5008	20.6671	23.5008	20.6671	23.5008	20.6671	23.5008	20.6671	23.5008	20.6671	23.5008	20.6671	23.5008	20.6671	138.853	20.6671	107.999	20.6671	93.9927
20.6837	-3.04354	20.6837	13.995	20.6837	13.995	20.6837	13.995	20.6837	13.995	20.6837	13.995	20.6837	13.995	20.6837	13.995	20.6837	126.611	20.6837	97.7624	20.6837	86.4136
20.7004	-1.79353	20.7004	14.1356	20.7004	14.1356	20.7004	14.1356	20.7004	14.1356	20.7004	14.1356	20.7004	14.1356	20.7004	14.1356	20.7004	134.609	20.7004	98.7115	20.7004	81.3706
20.7171	-6.79352	20.7171	15.8416	20.7171	15.8416	20.7171	15.8416	20.7171	15.8416	20.7171	15.8416	20.7171	15.8416	20.7171	15.8416	20.7171	132.457	20.7171	105.769	20.7171	81.6873
20.7337	3.20649	20.7337	12.8674	20.7337	12.8674	20.7337	12.8674	20.7337	12.8674	20.7337	12.8674	20.7337	12.8674	20.7337	12.8674	20.7337	144.334	20.7337	101.298	20.7337	92.0012
20.7504	-1.79351	20.7504	17.7315	20.7504	17.7315	20.7504	17.7315	20.7504	17.7315	20.7504	17.7315	20.7504	17.7315	20.7504	17.7315	20.7504	141.962	20.7504	103.274	20.7504	85.5862
20.7671	1.9565	20.7671	13.3633	20.7671	13.3633	20.7671	13.3633	20.7671	13.3633	20.7671	13.3633	20.7671	13.3633	20.7671	13.3633	20.7671	126.966	20.7671	98.0683	20.7671	85.2775
20.7837	0.706507	20.7837	17.479	20.7837	17.479	20.7837	17.479	20.7837	17.479	20.7837	17.479	20.7837	17.479	20.7837	17.479	20.7837	140.736	20.7837	106.829	20.7837	92.0972
20.8004	-3.04349	20.8004	12.1249	20.8004	12.1249	20.8004	12.1249	20.8004	12.1249	20.8004	12.1249	20.8004	12.1249	20.8004	12.1249	20.8004	146.504	20.8004	102.909	20.8004	74.6582
20.8171	4.45652	20.8171	11.6631	20.8171	11.6631	20.8171	11.6631	20.8171	11.6631	20.8171	11.6631	20.8171	11.6631	20.8171	11.6631	20.8171	152.426	20.8171	102.805	20.8171	81.1541
20.8338	-3.04347	20.8338	23.8338	20.8338	23.8338	20.8338	23.8338	20.8338	23.8338	20.8338	23.8338	20.8338	23.8338	20.8338	23.8338	20.8338	139.961	20.8338	106.162	20.8338	87.6985
20.8504	0.706536	20.8504	24.0582	20.8504	24.0582	20.8504	24.0582	20.8504	24.0582	20.8504	24.0582	20.8504	24.0582	20.8504	24.0582	20.8504	143.934	20.8504	102.431	20.8504	83.0015
20.8671	3.20654	20.8671	22.7007	20.8671	22.7007	20.8671	22.7007	20.8671	22.7007	20.8671	22.7007	20.8671	22.7007	20.8671	22.7007	20.8671	150.018	20.8671	113.042	20.8671	83.1259
20.8838	8.20655	20.8838	24.6522	20.8838	24.6522	20.8838	24.6522	20.8838	24.6522	20.8838	24.6522	20.8838	24.6522	20.8838	24.6522	20.8838	136.515	20.8838	110.616	20.8838	88.6664
20.9004	-0.543443	20.9004	23.8575	20.9004	23.8575	20.9004	23.8575	20.9004	23.8575	20.9004	23.8575	20.9004	23.8575	20.9004	23.8575	20.9004	145.312	20.9004	111.388	20.9004	79.3178
20.9171	4.45656	20.9171	26.3864	20.9171	26.3864	20.9171	26.3864	20.9171	26.3864	20.9171	26.3864	20.9171	26.3864	20.9171	26.3864	20.9171	144.759	20.9171	101.298	20.9171	90.187
20.9338	4.45657	20.9338	22.5481	20.9338	22.5481	20.9338	22.5481	20.9338	22.5481	20.9338	22.5481	20.9338	22.5481	20.9338	22.5481	20.9338	149.309	20.9338	101.851	20.9338	87.4445
20.9504	5.70658	20.9504	24.2642	20.9504	24.2642	20.9504	24.2642	20.9504	24.2642	20.9504	24.2642	20.9504	24.2642	20.9504	24.2642	20.9504	155.116	20.9504	115.954	20.9504	95.163
20.9671	0.706586	20.9671	22.8142	20.9671	22.8142	20.9671	22.8142	20.9671	22.8142	20.9671	22.8142	20.9671	22.8142	20.9671	22.8142	20.9671	149.009	20.9671	116.507	20.9671	98.5758
20.9838	4.45659	20.9838	33.0547	20.9838	33.0547	20.9838	33.0547	20.9838	33.0547	20.9838	33.0547	20.9838	33.0547	20.9838	33.0547	20.9838	145.652	20.9838	111.531	20.9838	87.9378
21.0004	11.9566	21.0004	34.0415	21.0004	34.0415	21.0004	34.0415	21.0004	34.0415	21.0004	34.0415	21.0004	34.0415	21.0004	34.0415	21.0004	145.871	21.0004	113.153	21.0004	99.5255
21.0171	6.95661	21.0171	32.5533	21.0171	32.5533	21.0171	32.5533	21.0171	32.5533	21.0171	32.5533	21.0171	32.5533	21.0171	32.5533	21.0171	148.29	21.0171	110.279	21.0171	101.29
21.0338	10.7066	21.0338	26.0317	21.0338	26.0317	21.0338	26.0317	21.0338	26.0317	21.0338	26.0317	21.0338	26.0317	21.0338	26.0317	21.0338	150.872	21.0338	129.992	21.0338	90.0184
21.0504	19.4566	21.0504	24.128	21.0504	24.128	21.0504	24.128	21.0504	24.128	21.0504	24.128	21.0504	24.128	21.0504	24.128	21.0504	149.76	21.0504	117.171	21.0504	95.9383
21.0671	13.2066	21.0671	40.1822	21.0671	40.1822	21.0671	40.1822	21.0671	40.1822	21.0671	40.1822	21.0671	40.1822	21.0671	40.1822	21.0671	160.465	21.0671	121.995	21.0671	96.1742
21.0838	11.9566	21.0838	34.3276	21.0838	34.3276	21.0838	34.3276	21.0838	34.3276	21.0838	34.3276	21.0838	34.3276	21.0838	34.3276	21.0838	157.003	21.0838	122.981	21.0838	98.6454
21.1004	25.7066	21.1004	39.0278	21.1004	39.0278	21.1004	39.0278	21.1004	39.0278	21.1004	39.0278	21.1004	39.0278	21.1004	39.0278	21.1004	162.485	21.1004	120.882	21.1004	111.646
21.1171	11.9567	21.1171	35.1599	21.1171	35.1599	21.1171	35.1599	21.1171	35.1599	21.1171	35.1599	21.1171	35.1599	21.1171	35.1599	21.1171	154.254	21.1171	122.051	21.1171	104.571
21.1338	20.7067	21.1338	31.476	21.1338	31.476	21.1338	31.476	21.1338	31.476	21.1338	31.476	21.1338	31.476	21.1338	31.476	21.1338	161.666	21.1338	122.74	21.1338	90.4115
21.1504	26.9567	21.1504	35.5255	21.1504	35.5255	21.1504	35.5255	21.1504	35.5255	21.1504	35.5255	21.1504	35.5255	21.1504	35.5255	21.1504	157.73	21.1504	125.808	21.1504	92.8055
21.1671	13.2067	21.1671	41.8188	21.1671	41.8188	21.1671	41.8188	21.1671	41.8188	21.1671	41.8188	21.1671	41.8188	21.1671	41.8188	21.1671	159.202	21.1671	125.777	21.1671	100.958
21.1838	14.4567	21.1838	44.1199	21.1838	44.1199	21.1838	44.1199	21.1838	44.1199	21.1838	44.1199	21.1838	44.1199	21.1838	44.1199	21.1838	178.869	21.1838	129.842	21.1838	100.243
21.2004	19.4567	21.2004	39.1148	21.2004	39.1148	21.2004	39.1148	21.2004	39.1148	21.2004	39.1148	21.2004	39.1148	21.2004	39.1148	21.2004	166.875	21.2004	126.915	21.2004	106.776
21.2171	23.2067	21.2171	37.2877	21.2171	37.2877	21.2171	37.2877	21.2171	37.2877	21.2171	37.2877	21.2171	37.2877	21.2171	37.2877	21.2171	168.458	21.2171	126.92	21.2171	92.1678
21.2338	11.9567	21.2338	45.6714	21.2338	45.6714	21.2338	45.6714	21.2338	45.6714	21.2338	45.6714	21.2338	45.6714	21.2338	45.6714	21.2338	167.038	21.2338	125.624	21.2338	107.095
21.2504	15.7067	21.2504	46.107	21.2504	46.107	21.2504	46.107	21.2504	46.107	21.2504	46.107	21.2504	46.107	21.2504	46.107	21.2504	175.34	21.2504	127.123	21.2504	104.626
21.2671	25.7067	21.2671	52.109	21.2671	52.109	21.2671	52.109	21.2671	52.109	21.2671	52.109	21.2671	52.109	21.2671	52.109	21.2671	166.768	21.2671	129.013	21.2671	115.801
21.2838	21.9567	21.2838	38.7731	21.2838	38.7731	21.2838	38.7731	21.2838	38.7731	21.2838	38.7731	21.2838	38.7731	21.2838	38.7731	21.2838	6.33249	21.2838	121.357	21.2838	103.548
21.3004	28.2067	21.3004	44.9433	21.3004	44.9433	21.3004	44.9433	21.3004	44.9433	21.3004	44.9433	21.3004	44.9433	21.3004	44.9433	21.3004	0.830275	21.3004	126.705	21.3004	110.84
21.3171	28.2067	21.3171	43.0379	21.3171	43.0379	21.3171	43.0379	21.3171	43.0379	21.3171	43.0379	21.3171	43.0379	21.3171	43.0379	21.3171	-0.211783	21.3171	132.219	21.3171	110.554
21.3338	28.2067	21.3338	49.4137	21.3338	49.4137	21.3338	49.4137	21.3338	49.4137	21.3338	49.4137	21.3338	49.4137	21.3338	49.4137	21.3338	0.673191	21.3338	133.956	21.3338	118.912
21.3504	29.4568	21.3504	45.3189	21.3504	45.3189	21.3504	45.3189	21.3504	45.3189	21.3504	45.3189	21.3504	45.3189	21.3504	45.3189	21.3504	8.78307	21.3504	123.127	21.3504	122.639
21.3671	26.9568	21.3671	48.8283	21.3671	48.8283	21.3671	48.8283	21.3671	48.8283	21.3671	48.8283	21.3671	48.8283	21.3671	48.8283	21.3671	2.70331	21.3671	131.881	21.3671	121.832
21.3838	21.9568	21.3838	53.709	21.3838	53.709	21.3838	53.709	21.3838	53.709	21.3838	53.709	21.3838	53.709	21.3838	53.709	21.3838	9.49151	21.3838	134.487	21.3838	123.923
21.4004	25.7068	21.4004	49.5401	21.4004	49.5401	21.4004	49.5401	21.4004	49.5401	21.4004	49.5401	21.4004	49.5401	21.4004	49.5401	21.4004	9.81308	21.4004	134.438	21.4004	125.429
21.4171	31.9568	21.4171	51.6243	21.4171	51.6243	21.4171	51.6243	21.4171	51.6243	21.4171	51.6243	21.4171	51.6243	21.4171	51.6243	21.4171	10.8069	21.4171	128.846	21.4171	123.088
21.4338	35.7068	21.4338	51.3049	21.4338	51.3049	21.4338	51.3049	21.4338	51.3049	21.4338	51.3049	21.4338	51.3049	21.4338	51.3049	21.4338	14.6151	21.4338	136.55	21.4338	131.029
21.4504	21.9568	21.4504	44.52	21.4504	44.52	21.4504	44.52	21.4504	44.52	21.4504	44.52	21.4504	44.52	21.4504	44.52	21.4504	8.86462	21.4504	137.718	21.4504	126.499
21.4671	28.2068	21.4671	49.9017	21.4671	49.9017	21.4671	49.9017	21.4671	49.9017	21.4671	49.9017	21.4671	49.9017	21.4671	49.9017	21.4671	16.9244	21.4671	143.891	21.4671	122.927
21.4838	25.7068	21.4838	50.51	21.4838	50.51	21.4838	50.51	21.4838	50.51	21.4838	50.51	21.4838	50.51	21.4838	50.51	21.4838	7.14163	21.4838	139.456	21.4838	136.681
21.5004	33.2068	21.5004	55.0472	21.5004	55.0472	21.5004	55.0472	21.5004	55.0472	21.5004	55.0472	21.5004	55.0472	21.5004	55.0472	21.5004	10.4224	21.5004	140.814	21.5004	125.331
21.5171	29.4568	21.5171	47.8765	21.5171	47.8765	21.5171	47.8765	21.5171	47.8765	21.5171	47.8765	21.5171	47.8765	21.5171	47.8765	21.5171	15.4615	21.5171	141.662	21.5171	140.73
21.5338	35.7068	21.5338	59.2825	21.5338	59.2825	21.5338	59.2825	21.5338	59.2825	21.5338	59.2825	21.5338	59.2825	21.5338	59.2825	21.5338	27.2429	21.5338	135.052	21.5338	126.13
21.5504	33.2068	21.5504	46.3653	21.5504	46.3653	21.5504	46.3653	21.5504	46.3653	21.5504	46.3653	21.5504	46.3653	21.5504	46.3653	21.5504	21.9157	21.5504	145.2	21.5504	138.92
21.5671	28.2068	21.5671	63.1411	21.5671	63.1411	21.5671	63.1411	21.5671	63.1411	21.5671	63.1411	21.5671	63.1411	21.5671	63.1411	21.5671	20.9702	21.5671	143.052	21.5671	132.126
21.5838	24.4569	21.5838	58.8056	21.5838	58.8056	21.5838	58.8056	21.5838	58.8056	21.5838	58.8056	21.5838	58.8056	21.5838	58.8056	21.5838	19.4684	21.5838	148.809	21.5838	153.057
21.6004	21.9569	21.6004	61.488	21.6004	61.488	21.6004	61.488	21.6004	61.488	21.6004	61.488	21.6004	61.488	21.6004	61.488	21.6004	22.9228	21.6004	154.376	21.6004	146.876
21.6171	34.4569	21.6171	66.1525	21.6171	66.1525	21.6171	66.1525	21.6171	66.1525	21.6171	66.1525	21.6171	66.1525	21.6171	66.1525	21.6171	20.1299	21.6171	159.033	21.6171	153.598
21.6338	25.7069	21.6338	57.1257	21.6338	57.1257	21.6338	57.1257	21.6338	57.1257	21.6338	57.1257	21.6338	57.1257	21.6338	57.1257	21.6338	16.4965	21.6338	157.144	21.6338	151.134
21.6504	26.9569	21.6504	57.8649	21.6504	57.8649	21.6504	57.8649	21.6504	57.8649	21.6504	57.8649	21.6504	57.8649	21.6504	57.8649	21.6504	11.6157	21.6504	156.406	21.6504	154.341
21.6671	26.9569	21.6671	63.1112	21.6671	63.1112	21.6671	63.1112	21.6671	63.1112	21.6671	63.1112	21.6671	63.1112	21.6671	63.1112	21.6671	20.1293	21.6671	151.324	21.6671	152.958
21.6838	28.2069	21.6838	62.9017	21.6838	62.9017	21.6838	62.9017	21.6838	62.9017	21.6838	62.9017	21.6838	62.9017	21.6838	62.9017	21.6838	23.8553	21.6838	163.95	21.6838	149.579
21.7004	20.7069	21.7004	55.7031	21.7004	55.7031	21.7004	55.7031	21.7004	55.7031	21.7004	55.7031	21.7004	55.7031	21.7004	55.7031	21.7004	33.8796	21.7004	160.201	21.7004	159.966
21.7171	31.9569	21.7171	65.8372	21.7171	65.8372	21.7171	65.8372	21.7171	65.8372	21.7171	65.8372	21.7171	65.8372	21.7171	65.8372	21.7171	25.3232	21.7171	174.084	21.7171	160.048
21.7338	35.7069	21.7338	69.3106	21.7338	69.3106	21.7338	69.3106	21.7338	69.3106	21.7338	69.3106	21.7338	69.3106	21.7338	69.3106	21.7338	20.6227	21.7338	170.57	21.7338	156.273
21.7504	36.9569	21.7504	72.7519	21.7504	72.7519	21.7504	72.7519	21.7504	72.7519	21.7504	72.7519	21.7504	72.7519	21.7504	72.7519	21.7504	28.1109	21.7504	175.521	21.7504	159.254
21.7671	23.2069	21.7671	70.8658	21.7671	70.8658	21.7671	70.8658	21.7671	70.8658	21.7671	70.8658	21.7671	70.8658	21.7671	70.8658	21.7671	39.1593	21.7671	178.019	21.7671	151.735
21.7838	25.7069	21.7838	65.8734	21.7838	65.8734	21.7838	65.8734	21.7838	65.8734	21.7838	65.8734	21.7838	65.8734	21.7838	65.8734	21.7838	28.7551	21.7838	161.728	21.7838	171.984
21.8004	16.9569	21.8004	63.5573	21.8004	63.5573	21.8004	63.5573	21.8004	63.5573	21.8004	63.5573	21.8004	63.5573	21.8004	63.5573	21.8004	26.9544	21.8004	175.594	21.8004	168.992
21.8171	26.957	21.8171	74.9158	21.8171	74.9158	21.8171	74.9158	21.8171	74.9158	21.8171	74.9158	21.8171	74.9158	21.8171	74.9158	21.8171	31.778	21.8171	169.625	21.8171	174.525
21.8338	29.457	21.8338	65.4531	21.8338	65.4531	21.8338	65.4531	21.8338	65.4531	21.8338	65.4531	21.8338	65.4531	21.8338	65.4531	21.8338	32.5101	21.8338	0.68426	21.8338	163.822
21.8504	30.707	21.8504	75.3975	21.8504	75.3975	21.8504	75.3975	21.8504	75.3975	21.8504	75.3975	21.8504	75.3975	21.8504	75.3975	21.8504	31.5937	21.8504	-5.15645	21.8504	170.398
21.8671	28.207	21.8671	69.7412	21.8671	69.7412	21.8671	69.7412	21.8671	69.7412	21.8671	69.7412	21.8671	69.7412	21.8671	69.7412	21.8671	32.8775	21.8671	1.38086	21.8671	171.089
21.8838	23.207	21.8838	73.6379	21.8838	73.6379	21.8838	73.6379	21.8838	73.6379	21.8838	73.6379	21.8838	73.6379	21.8838	73.6379	21.8838	36.7899	21.8838	5.36781	21.8838	173.1
21.9004	33.207	21.9004	71.9643	21.9004	71.9643	21.9004	71.9643	21.9004	71.9643	21.9004	71.9643	21.9004	71.9643	21.9004	71.9643	21.9004	34.7903	21.9004	18.6854	21.9004	163.574
21.9171	20.707	21.9171	78.9429	21.9171	78.9429	21.9171	78.9429	21.9171	78.9429	21.9171	78.9429	21.9171	78.9429	21.9171	78.9429	21.9171	45.1142	21.9171	10.2675	21.9171	166.175
21.9338	38.207	21.9338	79.5516	21.9338	79.5516	21.9338	79.5516	21.9338	79.5516	21.9338	79.5516	21.9338	79.5516	21.9338	79.5516	21.9338	43.3073	21.9338	9.4936	21.9338	177.088
21.9504	39.457	21.9504	80.655	21.9504	80.655	21.9504	80.655	21.9504	80.655	21.9504	80.655	21.9504	80.655	21.9504	80.655	21.9504	40.1471	21.9504	11.8596	21.9504	1.07582
21.9671	31.957	21.9671	73.2541	21.9671	73.2541	21.9671	73.2541	21.9671	73.2541	21.9671	73.2541	21.9671	73.2541	21.9671	73.2541	21.9671	42.7831	21.9671	9.24929	21.9671	9.18024
21.9838	41.957	21.9838	79.7617	21.9838	79.7617	21.9838	79.7617	21.9838	79.7617	21.9838	79.7617	21.9838	79.7617	21.9838	79.7617	21.9838	60.8247	21.9838	23.2757	21.9838	14.7422
22.0004	34.457	22.0004	78.1823	22.0004	78.1823	22.0004	78.1823	22.0004	78.1823	22.0004	78.1823	22.0004	78.1823	22.0004	78.1823	22.0004	47.0094	22.0004	17.5309	22.0004	6.03473
22.0171	39.457	22.0171	83.2532	22.0171	83.2532	22.0171	83.2532	22.0171	83.2532	22.0171	83.2532	22.0171	83.2532	22.0171	83.2532	22.0171	52.2467	22.0171	12.6404	22.0171	4.62171
22.0338	50.707	22.0338	76.6886	22.0338	76.6886	22.0338	76.6886	22.0338	76.6886	22.0338	76.6886	22.0338	76.6886	22.0338	76.6886	22.0338	54.1282	22.0338	11.9317	22.0338	15.1453
22.0504	29.4571	22.0504	79.8129	22.0504	79.8129	22.0504	79.8129	22.0504	79.8129	22.0504	79.8129	22.0504	79.8129	22.0504	79.8129	22.0504	47.1444	22.0504	13.6923	22.0504	13.2295
22.0671	45.7071	22.0671	81.0367	22.0671	81.0367	22.0671	81.0367	22.0671	81.0367	22.0671	81.0367	22.0671	81.0367	22.0671	81.0367	22.0671	50.1262	22.0671	17.947	22.0671	21.4052
22.0838	35.7071	22.0838	81.875	22.0838	81.875	22.0838	81.875	22.0838	81.875	22.0838	81.875	22.0838	81.875	22.0838	81.875	22.0838	61.877	22.0838	23.4122	22.0838	19.3744
22.1004	34.4571	22.1004	87.1061	22.1004	87.1061	22.1004	87.1061	22.1004	87.1061	22.1004	87.1061	22.1004	87.1061	22.1004	87.1061	22.1004	55.7202	22.1004	16.1576	22.1004	18.9619
22.1171	29.4571	22.1171	83.5762	22.1171	83.5762	22.1171	83.5762	22.1171	83.5762	22.1171	83.5762	22.1171	83.5762	22.1171	83.5762	22.1171	59.1831	22.1171	20.2692	22.1171	15.8629
22.1338	50.7071	22.1338	81.6199	22.1338	81.6199	22.1338	81.6199	22.1338	81.6199	22.1338	81.6199	22.1338	81.6199	22.1338	81.6199	22.1338	63.5078	22.1338	20.2122	22.1338	23.1224
22.1504	53.2071	22.1504	84.9857	22.1504	84.9857	22.1504	84.9857	22.1504	84.9857	22.1504	84.9857	22.1504	84.9857	22.1504	84.9857	22.1504	53.8014	22.1504	15.3587	22.1504	24.2502
22.1671	54.4571	22.1671	89.3356	22.1671	89.3356	22.1671	89.3356	22.1671	89.3356	22.1671	89.3356	22.1671	89.3356	22.1671	89.3356	22.1671	57.8784	22.1671	24.4543	22.1671	23.6533
22.1838	43.2071	22.1838	73.6313	22.1838	73.6313	22.1838	73.6313	22.1838	73.6313	22.1838	73.6313	22.1838	73.6313	22.1838	73.6313	22.1838	62.2908	22.1838	18.8098	22.1838	18.1173
22.2004	53.2071	22.2004	80.6735	22.2004	80.6735	22.2004	80.6735	22.2004	80.6735	22.2004	80.6735	22.2004	80.6735	22.2004	80.6735	22.2004	61.7703	22.2004	19.7241	22.2004	20.3729
22.2171	51.9571	22.2171	90.1084	22.2171	90.1084	22.2171	90.1084	22.2171	90.1084	22.2171	90.1084	22.2171	90.1084	22.2171	90.1084	22.2171	67.6555	22.2171	34.2796	22.2171	18.3027
22.2338	59.4571	22.2338	83.9524	22.2338	83.9524	22.2338	83.9524	22.2338	83.9524	22.2338	83.9524	22.2338	83.9524	22.2338	83.9524	22.2338	70.8572	22.2338	22.8641	22.2338	8.85216
22.2504	43.2071	22.2504	82.7412	22.2504	82.7412	22.2504	82.7412	22.2504	82.7412	22.2504	82.7412	22.2504	82.7412	22.2504	82.7412	22.2504	71.2171	22.2504	28.4692	22.2504	23.8506
22.2671	46.9571	22.2671	84.6436	22.2671	84.6436	22.2671	84.6436	22.2671	84.6436	22.2671	84.6436	22.2671	84.6436	22.2671	84.6436	22.2671	66.8134	22.2671	31.1038	22.2671	22.5167
22.2838	46.9572	22.2838	92.682	22.2838	92.682	22.2838	92.682	22.2838	92.682	22.2838	92.682	22.2838	92.682	22.2838	92.682	22.2838	68.0398	22.2838	35.3217	22.2838	26.2427
22.3004	49.4572	22.3004	87.9209	22.3004	87.9209	22.3004	87.9209	22.3004	87.9209	22.3004	87.9209	22.3004	87.9209	22.3004	87.9209	22.3004	77.567	22.3004	45.4061	22.3004	15.1196
22.3171	50.7072	22.3171	87.3151	22.3171	87.3151	22.3171	87.3151	22.3171	87.3151	22.3171	87.3151	22.3171	87.3151	22.3171	87.3151	22.3171	78.1047	22.3171	48.4529	22.3171	20.9225
22.3338	50.7072	22.3338	88.0151	22.3338	88.0151	22.3338	88.0151	22.3338	88.0151	22.3338	88.0151	22.3338	88.0151	22.3338	88.0151	22.3338	69.036	22.3338	32.9311	22.3338	15.0829
22.3504	49.4572	22.3504	92.8052	22.3504	92.8052	22.3504	92.8052	22.3504	92.8052	22.3504	92.8052	22.3504	92.8052	22.3504	92.8052	22.3504	80.2775	22.3504	34.978	22.3504	19.3944
22.3671	49.4572	22.3671	82.2088	22.3671	82.2088	22.3671	82.2088	22.3671	82.2088	22.3671	82.2088	22.3671	82.2088	22.3671	82.2088	22.3671	84.854	22.3671	43.2412	22.3671	23.5181
22.3838	61.9572	22.3838	95.3866	22.3838	95.3866	22.3838	95.3866	22.3838	95.3866	22.3838	95.3866	22.3838	95.3866	22.3838	95.3866	22.3838	80.9313	22.3838	33.3279	22.3838	23.8344
22.4004	61.9572	22.4004	92.3336	22.4004	92.3336	22.4004	92.3336	22.4004	92.3336	22.4004	92.3336	22.4004	92.3336	22.4004	92.3336	22.4004	79.8322	22.4004	37.8522	22.4004	19.1593
22.4171	55.7072	22.4171	92.4025	22.4171	92.4025	22.4171	92.4025	22.4171	92.4025	22.4171	92.4025	22.4171	92.4025	22.4171	92.4025	22.4171	78.751	22.4171	41.3129	22.4171	26.0251
22.4338	66.9572	22.4338	96.0812	22.4338	96.0812	22.4338	96.0812	22.4338	96.0812	22.4338	96.0812	22.4338	96.0812	22.4338	96.0812	22.4338	75.5925	22.4338	37.5638	22.4338	29.2596
22.4504	58.2072	22.4504	94.0253	22.4504	94.0253	22.4504	94.0253	22.4504	94.0253	22.4504	94.0253	22.4504	94.0253	22.4504	94.0253	22.4504	70.4383	22.4504	43.0146	22.4504	32.4022
22.4671	56.9572	22.4671	83.3812	22.4671	83.3812	22.4671	83.3812	22.4671	83.3812	22.4671	83.3812	22.4671	83.3812	22.4671	83.3812	22.4671	80.5673	22.4671	45.6055	22.4671	34.0036
22.4838	70.7072	22.4838	90.7795	22.4838	90.7795	22.4838	90.7795	22.4838	90.7795	22.4838	90.7795	22.4838	90.7795	22.4838	90.7795	22.4838	78.1908	22.4838	40.0613	22.4838	34.6025
22.5005	64.4572	22.5005	99.5896	22.5005	99.5896	22.5005	99.5896	22.5005	99.5896	22.5005	99.5896	22.5005	99.5896	22.5005	99.5896	22.5005	81.3443	22.5005	37.9305	22.5005	28.1756
22.5171	68.2073	22.5171	92.6586	22.5171	92.6586	22.5171	92.6586	22.5171	92.6586	22.5171	92.6586	22.5171	92.6586	22.5171	92.6586	22.5171	83.6946	22.5171	29.155	22.5171	27.7908
22.5338	66.9573	22.5338	100.559	22.5338	100.559	22.5338	100.559	22.5338	100.559	22.5338	100.559	22.5338	100.559	22.5338	100.559	22.5338	89.8204	22.5338	42.521	22.5338	29.3136
22.5505	68.2073	22.5505	89.2113	22.5505	89.2113	22.5505	89.2113	22.5505	89.2113	22.5505	89.2113	22.5505	89.2113	22.5505	89.2113	22.5505	80.4494	22.5505	49.5	22.5505	32.2472
22.5671	74.4573	22.5671	92.85	22.5671	92.85	22.5671	92.85	22.5671	92.85	22.5671	92.85	22.5671	92.85	22.5671	92.85	22.5671	77.43	22.5671	44.9869	22.5671	28.1598
22.5838	75.7073	22.5838	91.0051	22.5838	91.0051	22.5838	91.0051	22.5838	91.0051	22.5838	91.0051	22.5838	91.0051	22.5838	91.0051	22.5838	90.2505	22.5838	45.6627	22.5838	34.2512
22.6005	60.7073	22.6005	92.3107	22.6005	92.3107	22.6005	92.3107	22.6005	92.3107	22.6005	92.3107	22.6005	92.3107	22.6005	92.3107	22.6005	88.823	22.6005	49.585	22.6005	32.808
22.6171	80.7073	22.6171	96.4794	22.6171	96.4794	22.6171	96.4794	22.6171	96.4794	22.6171	96.4794	22.6171	96.4794	22.6171	96.4794	22.6171	85.345	22.6171	50.7116	22.6171	36.6884
22.6338	66.9573	22.6338	103.84	22.6338	103.84	22.6338	103.84	22.6338	103.84	22.6338	103.84	22.6338	103.84	22.6338	103.84	22.6338	83.249	22.6338	45.5611	22.6338	37.8199
22.6505	76.9573	22.6505	102.298	22.6505	102.298	22.6505	102.298	22.6505	102.298	22.6505	102.298	22.6505	102.298	22.6505	102.298	22.6505	86.3987	22.6505	54.2581	22.6505	48.1815
22.6671	76.9573	22.6671	90.5099	22.6671	90.5099	22.6671	90.5099	22.6671	90.5099	22.6671	90.5099	22.6671	90.5099	22.6671	90.5099	22.6671	92.2465	22.6671	54.1468	22.6671	46.1734
22.6838	95.7073	22.6838	102.949	22.6838	102.949	22.6838	102.949	22.6838	102.949	22.6838	102.949	22.6838	102.949	22.6838	102.949	22.6838	83.5107	22.6838	55.8837	22.6838	38.4896
22.7005	68.2073	22.7005	93.4449	22.7005	93.4449	22.7005	93.4449	22.7005	93.4449	22.7005	93.4449	22.7005	93.4449	22.7005	93.4449	22.7005	86.4551	22.7005	62.1539	22.7005	47.9944
22.7171	74.4573	22.7171	94.1129	22.7171	94.1129	22.7171	94.1129	22.7171	94.1129	22.7171	94.1129	22.7171	94.1129	22.7171	94.1129	22.7171	87.0341	22.7171	48.4323	22.7171	54.5907
22.7338	85.7073	22.7338	107.084	22.7338	107.084	22.7338	107.084	22.7338	107.084	22.7338	107.084	22.7338	107.084	22.7338	107.084	22.7338	96.7142	22.7338	57.0965	22.7338	46.0838
22.7505	79.4574	22.7505	107.062	22.7505	107.062	22.7505	107.062	22.7505	107.062	22.7505	107.062	22.7505	107.062	22.7505	107.062	22.7505	93.852	22.7505	59.7353	22.7505	44.7304
22.7671	91.9574	22.7671	107.158	22.7671	107.158	22.7671	107.158	22.7671	107.158	22.7671	107.158	22.7671	107.158	22.7671	107.158	22.7671	87.6336	22.7671	67.4389	22.7671	56.8177
22.7838	85.7074	22.7838	106.362	22.7838	106.362	22.7838	106.362	22.7838	106.362	22.7838	106.362	22.7838	106.362	22.7838	106.362	22.7838	92.198	22.7838	60.8379	22.7838	62.2259
22.8005	86.9574	22.8005	108.154	22.8005	108.154	22.8005	108.154	22.8005	108.154	22.8005	108.154	22.8005	108.154	22.8005	108.154	22.8005	93.0651	22.8005	68.0904	22.8005	61.0797
22.8171	91.9574	22.8171	102.62	22.8171	102.62	22.8171	102.62	22.8171	102.62	22.8171	102.62	22.8171	102.62	22.8171	102.62	22.8171	103.408	22.8171	65.3902	22.8171	57.4001
22.8338	88.2074	22.8338	112.177	22.8338	112.177	22.8338	112.177	22.8338	112.177	22.8338	112.177	22.8338	112.177	22.8338	112.177	22.8338	97.2174	22.8338	62.5101	22.8338	59.8928
22.8505	95.7074	22.8505	109.106	22.8505	109.106	22.8505	109.106	22.8505	109.106	22.8505	109.106	22.8505	109.106	22.8505	109.106	22.8505	95.6308	22.8505	74.5288	22.8505	65.4471
22.8671	95.7074	22.8671	106.936	22.8671	106.936	22.8671	106.936	22.8671	106.936	22.8671	106.936	22.8671	106.936	22.8671	106.936	22.8671	90.4501	22.8671	83.3616	22.8671	60.7548
22.8838	75.7074	22.8838	102.379	22.8838	102.379	22.8838	102.379	22.8838	102.379	22.8838	102.379	22.8838	102.379	22.8838	102.379	22.8838	83.7033	22.8838	83.2531	22.8838	60.4396
22.9005	96.9574	22.9005	116.464	22.9005	116.464	22.9005	116.464	22.9005	116.464	22.9005	116.464	22.9005	116.464	22.9005	116.464	22.9005	98.9825	22.9005	78.1083	22.9005	52.6656
22.9171	84.4574	22.9171	102.693	22.9171	102.693	22.9171	102.693	22.9171	102.693	22.9171	102.693	22.9171	102.693	22.9171	102.693	22.9171	99.8056	22.9171	84.6872	22.9171	56.047
22.9338	85.7074	22.9338	98.9907	22.9338	98.9907	22.9338	98.9907	22.9338	98.9907	22.9338	98.9907	22.9338	98.9907	22.9338	98.9907	22.9338	89.2756	22.9338	77.3821	22.9338	66.1736
22.9505	91.9574	22.9505	103.935	22.9505	103.935	22.9505	103.935	22.9505	103.935	22.9505	103.935	22.9505	103.935	22.9505	103.935	22.9505	90.9	22.9505	80.2057	22.9505	53.5188
22.9671	81.9574	22.9671	110.188	22.9671	110.188	22.9671	110.188	22.9671	110.188	22.9671	110.188	22.9671	110.188	22.9671	110.188	22.9671	104.328	22.9671	71.203	22.9671	57.3594
22.9838	84.4575	22.9838	108.954	22.9838	108.954	22.9838	108.954	22.9838	108.954	22.9838	108.954	22.9838	108.954	22.9838	108.954	22.9838	100.152	22.9838	85.7127	22.9838	55.633
23.0005	93.2075	23.0005	104.413	23.0005	104.413	23.0005	104.413	23.0005	104.413	23.0005	104.413	23.0005	104.413	23.0005	104.413	23.0005	88.6087	23.0005	85.8108	23.0005	64.1773
23.0171	99.4575	23.0171	93.4158	23.0171	93.4158	23.0171	93.4158	23.0171	93.4158	23.0171	93.4158	23.0171	93.4158	23.0171	93.4158	23.0171	98.8507	23.0171	87.4781	23.0171	62.6187
23.0338	91.9575	23.0338	113.747	23.0338	113.747	23.0338	113.747	23.0338	113.747	23.0338	113.747	23.0338	113.747	23.0338	113.747	23.0338	99.1788	23.0338	75.6171	23.0338	73.9279
23.0505	90.7075	23.0505	108.502	23.0505	108.502	23.0505	108.502	23.0505	108.502	23.0505	108.502	23.0505	108.502	23.0505	108.502	23.0505	101.353	23.0505	83.5181	23.0505	72.4371
23.0671	98.2075	23.0671	113.96	23.0671	113.96	23.0671	113.96	23.0671	113.96	23.0671	113.96	23.0671	113.96	23.0671	113.96	23.0671	106.006	23.0671	79.896	23.0671	65.4883
23.0838	88.2075	23.0838	110.08	23.0838	110.08	23.0838	110.08	23.0838	110.08	23.0838	110.08	23.0838	110.08	23.0838	110.08	23.0838	96.3421	23.0838	93.1239	23.0838	71.8326
23.1005	90.7075	23.1005	113.452	23.1005	113.452	23.1005	113.452	23.1005	113.452	23.1005	113.452	23.1005	113.452	23.1005	113.452	23.1005	93.1522	23.1005	84.7413	23.1005	79.7843
23.1171	96.9575	23.1171	123.02	23.1171	123.02	23.1171	123.02	23.1171	123.02	23.1171	123.02	23.1171	123.02	23.1171	123.02	23.1171	98.7076	23.1171	82.3559	23.1171	76.5594
23.1338	101.958	23.1338	121.187	23.1338	121.187	23.1338	121.187	23.1338	121.187	23.1338	121.187	23.1338	121.187	23.1338	121.187	23.1338	94.9778	23.1338	88.0301	23.1338	84.8939
23.1505	95.7075	23.1505	119.544	23.1505	119.544	23.1505	119.544	23.1505	119.544	23.1505	119.544	23.1505	119.544	23.1505	119.544	23.1505	99.6999	23.1505	77.6692	23.1505	78.1467
23.1671	100.708	23.1671	125.704	23.1671	125.704	23.1671	125.704	23.1671	125.704	23.1671	125.704	23.1671	125.704	23.1671	125.704	23.1671	101.495	23.1671	89.5056	23.1671	82.6606
23.1838	101.958	23.1838	121.756	23.1838	121.756	23.1838	121.756	23.1838	121.756	23.1838	121.756	23.1838	121.756	23.1838	121.756	23.1838	103.768	23.1838	90.5253	23.1838	69.3702
23.2005	96.9575	23.2005	122.312	23.2005	122.312	23.2005	122.312	23.2005	122.312	23.2005	122.312	23.2005	122.312	23.2005	122.312	23.2005	107.757	23.2005	92.164	23.2005	76.0054
23.2171	104.458	23.2171	122.884	23.2171	122.884	23.2171	122.884	23.2171	122.884	23.2171	122.884	23.2171	122.884	23.2171	122.884	23.2171	99.4124	23.2171	84.2343	23.2171	81.922
23.2338	104.458	23.2338	135.264	23.2338	135.264	23.2338	135.264	23.2338	135.264	23.2338	135.264	23.2338	135.264	23.2338	135.264	23.2338	108.954	23.2338	87.8538	23.2338	87.0901
23.2505	101.958	23.2505	129.85	23.2505	129.85	23.2505	129.85	23.2505	129.85	23.2505	129.85	23.2505	129.85	23.2505	129.85	23.2505	94.3421	23.2505	89.1108	23.2505	89.9458
23.2671	101.958	23.2671	125.714	23.2671	125.714	23.2671	125.714	23.2671	125.714	23.2671	125.714	23.2671	125.714	23.2671	125.714	23.2671	106.543	23.2671	86.0576	23.2671	75.581
23.2838	103.208	23.2838	133.764	23.2838	133.764	23.2838	133.764	23.2838	133.764	23.2838	133.764	23.2838	133.764	23.2838	133.764	23.2838	104.415	23.2838	95.2991	23.2838	83.5427
23.3005	95.7076	23.3005	123.9	23.3005	123.9	23.3005	123.9	23.3005	123.9	23.3005	123.9	23.3005	123.9	23.3005	123.9	23.3005	102.966	23.3005	90.5376	23.3005	91.1563
23.3171	88.2076	23.3171	131.277	23.3171	131.277	23.3171	131.277	23.3171	131.277	23.3171	131.277	23.3171	131.277	23.3171	131.277	23.3171	101.892	23.3171	92.3233	23.3171	91.2523
23.3338	113.208	23.3338	120.735	23.3338	120.735	23.3338	120.735	23.3338	120.735	23.3338	120.735	23.3338	120.735	23.3338	120.735	23.3338	114.221	23.3338	86.7494	23.3338	81.405
23.3505	113.208	23.3505	119.667	23.3505	119.667	23.3505	119.667	23.3505	119.667	23.3505	119.667	23.3505	119.667	23.3505	119.667	23.3505	112.035	23.3505	94.8482	23.3505	82.3162
23.3671	115.708	23.3671	130.241	23.3671	130.241	23.3671	130.241	23.3671	130.241	23.3671	130.241	23.3671	130.241	23.3671	130.241	23.3671	114.067	23.3671	94.9379	23.3671	87.2854
23.3838	116.958	23.3838	134.945	23.3838	134.945	23.3838	134.945	23.3838	134.945	23.3838	134.945	23.3838	134.945	23.3838	134.945	23.3838	116.817	23.3838	94.4742	23.3838	89.0602
23.4005	105.708	23.4005	125.54	23.4005	125.54	23.4005	125.54	23.4005	125.54	23.4005	125.54	23.4005	125.54	23.4005	125.54	23.4005	123.902	23.4005	89.1	23.4005	87.9422
23.4171	109.458	23.4171	122.057	23.4171	122.057	23.4171	122.057	23.4171	122.057	23.4171	122.057	23.4171	122.057	23.4171	122.057	23.4171	116.416	23.4171	84.651	23.4171	77.7383
23.4338	111.958	23.4338	128.39	23.4338	128.39	23.4338	128.39	23.4338	128.39	23.4338	128.39	23.4338	128.39	23.4338	128.39	23.4338	112.333	23.4338	100.937	23.4338	86.8201
23.4505	114.458	23.4505	132.275	23.4505	132.275	23.4505	132.275	23.4505	132.275	23.4505	132.275	23.4505	132.275	23.4505	132.275	23.4505	118.266	23.4505	93.2576	23.4505	79.3339
23.4671	114.458	23.4671	143.025	23.4671	143.025	23.4671	143.025	23.4671	143.025	23.4671	143.025	23.4671	143.025	23.4671	143.025	23.4671	120.056	23.4671	97.9693	23.4671	82.5029
23.4838	124.458	23.4838	131.881	23.4838	131.881	23.4838	131.881	23.4838	131.881	23.4838	131.881	23.4838	131.881	23.4838	131.881	23.4838	116.295	23.4838	103.169	23.4838	85.2415
23.5005	113.208	23.5005	137.541	23.5005	137.541	23.5005	137.541	23.5005	137.541	23.5005	137.541	23.5005	137.541	23.5005	137.541	23.5005	121.566	23.5005	107.525	23.5005	74.2093
23.5171	114.458	23.5171	138.313	23.5171	138.313	23.5171	138.313	23.5171	138.313	23.5171	138.313	23.5171	138.313	23.5171	138.313	23.5171	129.643	23.5171	108.895	23.5171	76.4857
23.5338	113.208	23.5338	143.795	23.5338	143.795	23.5338	143.795	23.5338	143.795	23.5338	143.795	23.5338	143.795	23.5338	143.795	23.5338	131.195	23.5338	106.667	23.5338	84.2112
23.5505	118.208	23.5505	145.365	23.5505	145.365	23.5505	145.365	23.5505	145.365	23.5505	145.365	23.5505	145.365	23.5505	145.365	23.5505	128.944	23.5505	108.634	23.5505	88.3959
23.5671	113.208	23.5671	137.397	23.5671	137.397	23.5671	137.397	23.5671	137.397	23.5671	137.397	23.5671	137.397	23.5671	137.397	23.5671	123.323	23.5671	107.776	23.5671	81.3021
23.5838	110.708	23.5838	138.112	23.5838	138.112	23.5838	138.112	23.5838	138.112	23.5838	138.112	23.5838	138.112	23.5838	138.112	23.5838	126.19	23.5838	102.822	23.5838	86.3979
23.6005	101.958	23.6005	151.547	23.6005	151.547	23.6005	151.547	23.6005	151.547	23.6005	151.547	23.6005	151.547	23.6005	151.547	23.6005	123.094	23.6005	110.505	23.6005	85.6387
23.6171	106.958	23.6171	147.169	23.6171	147.169	23.6171	147.169	23.6171	147.169	23.6171	147.169	23.6171	147.169	23.6171	147.169	23.6171	122.222	23.6171	110.683	23.6171	84.0311
23.6338	116.958	23.6338	139.194	23.6338	139.194	23.6338	139.194	23.6338	139.194	23.6338	139.194	23.6338	139.194	23.6338	139.194	23.6338	119.299	23.6338	114.662	23.6338	89.6443
23.6505	118.208	23.6505	150.949	23.6505	150.949	23.6505	150.949	23.6505	150.949	23.6505	150.949	23.6505	150.949	23.6505	150.949	23.6505	132.348	23.6505	111.035	23.6505	84.3218
23.6671	125.708	23.6671	146.643	23.6671	146.643	23.6671	146.643	23.6671	146.643	23.6671	146.643	23.6671	146.643	23.6671	146.643	23.6671	137.642	23.6671	97.1017	23.6671	99.2564
23.6838	120.708	23.6838	150.482	23.6838	150.482	23.6838	150.482	23.6838	150.482	23.6838	150.482	23.6838	150.482	23.6838	150.482	23.6838	132.341	23.6838	120.106	23.6838	87.2028
23.7005	123.208	23.7005	154.156	23.7005	154.156	23.7005	154.156	23.7005	154.156	23.7005	154.156	23.7005	154.156	23.7005	154.156	23.7005	131.609	23.7005	112.176	23.7005	88.9853
23.7171	120.708	23.7171	152.219	23.7171	152.219	23.7171	152.219	23.7171	152.219	23.7171	152.219	23.7171	152.219	23.7171	152.219	23.7171	128.48	23.7171	123.944	23.7171	80.9314
23.7338	115.708	23.7338	158.104	23.7338	158.104	23.7338	158.104	23.7338	158.104	23.7338	158.104	23.7338	158.104	23.7338	158.104	23.7338	132.241	23.7338	114.574	23.7338	75.4138
23.7505	120.708	23.7505	141.678	23.7505	141.678	23.7505	141.678	23.7505	141.678	23.7505	141.678	23.7505	141.678	23.7505	141.678	23.7505	135.205	23.7505	124.031	23.7505	83.1452
23.7671	116.958	23.7671	154.692	23.7671	154.692	23.7671	154.692	23.7671	154.692	23.7671	154.692	23.7671	154.692	23.7671	154.692	23.7671	126.696	23.7671	119.367	23.7671	90.0956
23.7838	126.958	23.7838	159.652	23.7838	159.652	23.7838	159.652	23.7838	159.652	23.7838	159.652	23.7838	159.652	23.7838	159.652	23.7838	140.812	23.7838	113.965	23.7838	87.5468
23.8005	138.208	23.8005	151.741	23.8005	151.741	23.8005	151.741	23.8005	151.741	23.8005	151.741	23.8005	151.741	23.8005	151.741	23.8005	130.497	23.8005	120.288	23.8005	85.8925
23.8171	130.708	23.8171	157.101	23.8171	157.101	23.8171	157.101	23.8171	157.101	23.8171	157.101	23.8171	157.101	23.8171	157.101	23.8171	127.773	23.8171	122.614	23.8171	84.1303
23.8338	140.708	23.8338	162.421	23.8338	162.421	23.8338	162.421	23.8338	162.421	23.8338	162.421	23.8338	162.421	23.8338	162.421	23.8338	144.393	23.8338	124.802	23.8338	83.4337
23.8505	130.708	23.8505	157.339	23.8505	157.339	23.8505	157.339	23.8505	157.339	23.8505	157.339	23.8505	157.339	23.8505	157.339	23.8505	131.451	23.8505	118.581	23.8505	79.4372
23.8671	140.708	23.8671	159.052	23.8671	159.052	23.8671	159.052	23.8671	159.052	23.8671	159.052	23.8671	159.052	23.8671	159.052	23.8671	136.739	23.8671	127.852	23.8671	78.7873
23.8838	139.458	23.8838	137.765	23.8838	137.765	23.8838	137.765	23.8838	137.765	23.8838	137.765	23.8838	137.765	23.8838	137.765	23.8838	148.84	23.8838	122.383	23.8838	75.8174
23.9005	134.458	23.9005	162.494	23.9005	162.494	23.9005	162.494	23.9005	162.494	23.9005	162.494	23.9005	162.494	23.9005	162.494	23.9005	142.884	23.9005	118.596	23.9005	94.2648
23.9171	151.958	23.9171	157.942	23.9171	157.942	23.9171	157.942	23.9171	157.942	23.9171	157.942	23.9171	157.942	23.9171	157.942	23.9171	136.267	23.9171	123.919	23.9171	91.1951
23.9338	149.458	23.9338	165.004	23.9338	165.004	23.9338	165.004	23.9338	165.004	23.9338	165.004	23.9338	165.004	23.9338	165.004	23.9338	145.49	23.9338	131.241	23.9338	88.8483
23.9505	146.958	23.9505	168.609	23.9505	168.609	23.9505	168.609	23.9505	168.609	23.9505	168.609	23.9505	168.609	23.9505	168.609	23.9505	146.884	23.9505	134.282	23.9505	95.2005
23.9671	144.458	23.9671	159.792	23.9671	159.792	23.9671	159.792	23.9671	159.792	23.9671	159.792	23.9671	159.792	23.9671	159.792	23.9671	145.745	23.9671	124.115	23.9671	87.2276
23.9838	158.208	23.9838	164.046	23.9838	164.046	23.9838	164.046	23.9838	164.046	23.9838	164.046	23.9838	164.046	23.9838	164.046	23.9838	141.265	23.9838	129.738	23.9838	83.4436
24.0005	158.208	24.0005	159.055	24.0005	159.055	24.0005	159.055	24.0005	159.055	24.0005	159.055	24.0005	159.055	24.0005	159.055	24.0005	141.791	24.0005	129.301	24.0005	85.0557
24.0171	165.708	24.0171	156.143	24.0171	156.143	24.0171	156.143	24.0171	156.143	24.0171	156.143	24.0171	156.143	24.0171	156.143	24.0171	154.636	24.0171	128.538	24.0171	82.4378
24.0338	161.958	24.0338	157.992	24.0338	157.992	24.0338	157.992	24.0338	157.992	24.0338	157.992	24.0338	157.992	24.0338	157.992	24.0338	141.086	24.0338	124.3	24.0338	94.1918
24.0505	160.708	24.0505	161.224	24.0505	161.224	24.0505	161.224	24.0505	161.224	24.0505	161.224	24.0505	161.224	24.0505	161.224	24.0505	152.643	24.0505	132.654	24.0505	86.4742
24.0671	154.458	24.0671	163.816	24.0671	163.816	24.0671	163.816	24.0671	163.816	24.0671	163.816	24.0671	163.816	24.0671	163.816	24.0671	152.41	24.0671	127.64	24.0671	91.6324
24.0838	150.708	24.0838	165.939	24.0838	165.939	24.0838	165.939	24.0838	165.939	24.0838	165.939	24.0838	165.939	24.0838	165.939	24.0838	152.032	24.0838	134.17	24.0838	85.8598
24.1005	146.958	24.1005	162.384	24.1005	162.384	24.1005	162.384	24.1005	162.384	24.1005	162.384	24.1005	162.384	24.1005	162.384	24.1005	152.004	24.1005	117.177	24.1005	98.1093
24.1171	144.458	24.1171	165.659	24.1171	165.659	24.1171	165.659	24.1171	165.659	24.1171	165.659	24.1171	165.659	24.1171	165.659	24.1171	157.062	24.1171	133.497	24.1171	92.4627
24.1338	160.708	24.1338	162.246	24.1338	162.246	24.1338	162.246	24.1338	162.246	24.1338	162.246	24.1338	162.246	24.1338	162.246	24.1338	151.218	24.1338	129.847	24.1338	95.2015
24.1505	146.958	24.1505	175.902	24.1505	175.902	24.1505	175.902	24.1505	175.902	24.1505	175.902	24.1505	175.902	24.1505	175.902	24.1505	158.119	24.1505	130.165	24.1505	85.7261
24.1672	151.958	24.1672	174.417	24.1672	174.417	24.1672	174.417	24.1672	174.417	24.1672	174.417	24.1672	174.417	24.1672	174.417	24.1672	148.38	24.1672	137.029	24.1672	91.7839
24.1838	150.708	24.1838	159.943	24.1838	159.943	24.1838	159.943	24.1838	159.943	24.1838	159.943	24.1838	159.943	24.1838	159.943	24.1838	153.073	24.1838	129.952	24.1838	89.5988
24.2005	153.208	24.2005	165.451	24.2005	165.451	24.2005	165.451	24.2005	165.451	24.2005	165.451	24.2005	165.451	24.2005	165.451	24.2005	158.787	24.2005	134.001	24.2005	91.166
24.2172	141.958	24.2172	178.987	24.2172	178.987	24.2172	178.987	24.2172	178.987	24.2172	178.987	24.2172	178.987	24.2172	178.987	24.2172	159.049	24.2172	134.596	24.2172	93.3252
24.2338	149.458	24.2338	177.064	24.2338	177.064	24.2338	177.064	24.2338	177.064	24.2338	177.064	24.2338	177.064	24.2338	177.064	24.2338	161.681	24.2338	114.507	24.2338	90.2339
24.2505	154.458	24.2505	-3.7318	24.2505	-3.7318	24.2505	-3.7318	24.2505	-3.7318	24.2505	-3.7318	24.2505	-3.7318	24.2505	-3.7318	24.2505	160.712	24.2505	126.171	24.2505	96.4357
24.2672	140.708	24.2672	1.19627	24.2672	1.19627	24.2672	1.19627	24.2672	1.19627	24.2672	1.19627	24.2672	1.19627	24.2672	1.19627	24.2672	156.923	24.2672	130.538	24.2672	79.1172
24.2838	151.958	24.2838	-4.46595	24.2838	-4.46595	24.2838	-4.46595	24.2838	-4.46595	24.2838	-4.46595	24.2838	-4.46595	24.2838	-4.46595	24.2838	146.901	24.2838	134.503	24.2838	91.2902
24.3005	140.708	24.3005	5.83193	24.3005	5.83193	24.3005	5.83193	24.3005	5.83193	24.3005	5.83193	24.3005	5.83193	24.3005	5.83193	24.3005	159.921	24.3005	138.022	24.3005	85.9411
24.3172	144.458	24.3172	11.715	24.3172	11.715	24.3172	11.715	24.3172	11.715	24.3172	11.715	24.3172	11.715	24.3172	11.715	24.3172	155.549	24.3172	127.01	24.3172	80.3862
24.3338	145.708	24.3338	-1.3408	24.3338	-1.3408	24.3338	-1.3408	24.3338	-1.3408	24.3338	-1.3408	24.3338	-1.3408	24.3338	-1.3408	24.3338	159.938	24.3338	124.916	24.3338	88.7275
24.3505	136.958	24.3505	7.6041	24.3505	7.6041	24.3505	7.6041	24.3505	7.6041	24.3505	7.6041	24.3505	7.6041	24.3505	7.6041	24.3505	165.188	24.3505	137.884	24.3505	89.357
24.3672	145.708	24.3672	-0.930479	24.3672	-0.930479	24.3672	-0.930479	24.3672	-0.930479	24.3672	-0.930479	24.3672	-0.930479	24.3672	-0.930479	24.3672	156.014	24.3672	139.988	24.3672	88.6259
24.3838	143.208	24.3838	-5.53148	24.3838	-5.53148	24.3838	-5.53148	24.3838	-5.53148	24.3838	-5.53148	24.3838	-5.53148	24.3838	-5.53148	24.3838	156.878	24.3838	132.803	24.3838	90.095
24.4005	160.708	24.4005	3.36445	24.4005	3.36445	24.4005	3.36445	24.4005	3.36445	24.4005	3.36445	24.4005	3.36445	24.4005	3.36445	24.4005	172.564	24.4005	136.473	24.4005	84.9669
24.4172	148.208	24.4172	5.25042	24.4172	5.25042	24.4172	5.25042	24.4172	5.25042	24.4172	5.25042	24.4172	5.25042	24.4172	5.25042	24.4172	172.242	24.4172	153.201	24.4172	85.6941
24.4338	158.208	24.4338	5.77599	24.4338	5.77599	24.4338	5.77599	24.4338	5.77599	24.4338	5.77599	24.4338	5.77599	24.4338	5.77599	24.4338	172.351	24.4338	142.679	24.4338	90.6196
24.4505	9.45808	24.4505	6.15898	24.4505	6.15898	24.4505	6.15898	24.4505	6.15898	24.4505	6.15898	24.4505	6.15898	24.4505	6.15898	24.4505	160.353	24.4505	144.796	24.4505	101.973
24.4672	-4.01835	24.4672	9.76196	24.4672	9.76196	24.4672	9.76196	24.4672	9.76196	24.4672	9.76196	24.4672	9.76196	24.4672	9.76196	24.4672	166.434	24.4672	141.603	24.4672	93.8237
24.4838	-4.01834	24.4838	8.81808	24.4838	8.81808	24.4838	8.81808	24.4838	8.81808	24.4838	8.81808	24.4838	8.81808	24.4838	8.81808	24.4838	174.8	24.4838	152.655	24.4838	106.371
24.5005	-4.01834	24.5005	14.2658	24.5005	14.2658	24.5005	14.2658	24.5005	14.2658	24.5005	14.2658	24.5005	14.2658	24.5005	14.2658	24.5005	171.01	24.5005	150.508	24.5005	97.4082
24.5172	-0.26833	24.5172	10.9573	24.5172	10.9573	24.5172	10.9573	24.5172	10.9573	24.5172	10.9573	24.5172	10.9573	24.5172	10.9573	24.5172	3.52802	24.5172	152.351	24.5172	93.4715
24.5338	-5.26832	24.5338	9.95389	24.5338	9.95389	24.5338	9.95389	24.5338	9.95389	24.5338	9.95389	24.5338	9.95389	24.5338	9.95389	24.5338	-2.1168	24.5338	146.65	24.5338	97.5833
24.5505	10.9817	24.5505	14.1258	24.5505	14.1258	24.5505	14.1258	24.5505	14.1258	24.5505	14.1258	24.5505	14.1258	24.5505	14.1258	24.5505	4.97647	24.5505	142.089	24.5505	96.9636
24.5672	5.98169	24.5672	12.471	24.5672	12.471	24.5672	12.471	24.5672	12.471	24.5672	12.471	24.5672	12.471	24.5672	12.471	24.5672	4.3383	24.5672	146.956	24.5672	97.104
24.5838	-1.5183	24.5838	17.2691	24.5838	17.2691	24.5838	17.2691	24.5838	17.2691	24.5838	17.2691	24.5838	17.2691	24.5838	17.2691	24.5838	2.00937	24.5838	146.387	24.5838	95.6243
24.6005	4.73171	24.6005	24.4376	24.6005	24.4376	24.6005	24.4376	24.6005	24.4376	24.6005	24.4376	24.6005	24.4376	24.6005	24.4376	24.6005	8.83961	24.6005	153.722	24.6005	96.5999
24.6172	0.981713	24.6172	19.5401	24.6172	19.5401	24.6172	19.5401	24.6172	19.5401	24.6172	19.5401	24.6172	19.5401	24.6172	19.5401	24.6172	12.848	24.6172	153.477	24.6172	101.324
24.6338	3.48172	24.6338	25.6054	24.6338	25.6054	24.6338	25.6054	24.6338	25.6054	24.6338	25.6054	24.6338	25.6054	24.6338	25.6054	24.6338	14.4447	24.6338	158.465	24.6338	96.1493
24.6505	4.73173	24.6505	16.0316	24.6505	16.0316	24.6505	16.0316	24.6505	16.0316	24.6505	16.0316	24.6505	16.0316	24.6505	16.0316	24.6505	11.6756	24.6505	149.202	24.6505	100.346
24.6672	4.73173	24.6672	17.4643	24.6672	17.4643	24.6672	17.4643	24.6672	17.4643	24.6672	17.4643	24.6672	17.4643	24.6672	17.4643	24.6672	3.63514	24.6672	161.865	24.6672	103.53
24.6838	-2.76826	24.6838	16.8829	24.6838	16.8829	24.6838	16.8829	24.6838	16.8829	24.6838	16.8829	24.6838	16.8829	24.6838	16.8829	24.6838	14.3849	24.6838	160.715	24.6838	88.3316
24.7005	-5.26825	24.7005	24.6204	24.7005	24.6204	24.7005	24.6204	24.7005	24.6204	24.7005	24.6204	24.7005	24.6204	24.7005	24.6204	24.7005	10.4513	24.7005	165.967	24.7005	98.9231
24.7172	2.23176	24.7172	11.5598	24.7172	11.5598	24.7172	11.5598	24.7172	11.5598	24.7172	11.5598	24.7172	11.5598	24.7172	11.5598	24.7172	11.857	24.7172	164.708	24.7172	89.8654
24.7338	-0.268237	24.7338	14.833	24.7338	14.833	24.7338	14.833	24.7338	14.833	24.7338	14.833	24.7338	14.833	24.7338	14.833	24.7338	19.6678	24.7338	167.491	24.7338	101.803
24.7505	8.48177	24.7505	21.4745	24.7505	21.4745	24.7505	21.4745	24.7505	21.4745	24.7505	21.4745	24.7505	21.4745	24.7505	21.4745	24.7505	16.1547	24.7505	163.898	24.7505	99.7946
24.7672	0.981778	24.7672	14.5261	24.7672	14.5261	24.7672	14.5261	24.7672	14.5261	24.7672	14.5261	24.7672	14.5261	24.7672	14.5261	24.7672	16.4177	24.7672	157.505	24.7672	108.06
24.7838	0.981785	24.7838	14.7731	24.7838	14.7731	24.7838	14.7731	24.7838	14.7731	24.7838	14.7731	24.7838	14.7731	24.7838	14.7731	24.7838	18.5625	24.7838	168.179	24.7838	116.916
24.8005	9.73179	24.8005	28.5788	24.8005	28.5788	24.8005	28.5788	24.8005	28.5788	24.8005	28.5788	24.8005	28.5788	24.8005	28.5788	24.8005	22.0208	24.8005	174.218	24.8005	102.037
24.8172	9.7318	24.8172	29.5453	24.8172	29.5453	24.8172	29.5453	24.8172	29.5453	24.8172	29.5453	24.8172	29.5453	24.8172	29.5453	24.8172	10.3179	24.8172	164.808	24.8172	113.541
24.8338	0.981806	24.8338	22.9473	24.8338	22.9473	24.8338	22.9473	24.8338	22.9473	24.8338	22.9473	24.8338	22.9473	24.8338	22.9473	24.8338	19.6346	24.8338	172.387	24.8338	118.143
24.8505	0.981814	24.8505	20.0413	24.8505	20.0413	24.8505	20.0413	24.8505	20.0413	24.8505	20.0413	24.8505	20.0413	24.8505	20.0413	24.8505	15.6494	24.8505	7.72522	24.8505	118.692
24.8672	14.7318	24.8672	26.779	24.8672	26.779	24.8672	26.779	24.8672	26.779	24.8672	26.779	24.8672	26.779	24.8672	26.779	24.8672	16.9298	24.8672	7.55745	24.8672	115.504
24.8838	9.73183	24.8838	28.5075	24.8838	28.5075	24.8838	28.5075	24.8838	28.5075	24.8838	28.5075	24.8838	28.5075	24.8838	28.5075	24.8838	25.937	24.8838	17.2369	24.8838	122.71
24.9005	10.9818	24.9005	28.7117	24.9005	28.7117	24.9005	28.7117	24.9005	28.7117	24.9005	28.7117	24.9005	28.7117	24.9005	28.7117	24.9005	31.935	24.9005	9.57794	24.9005	118.21
24.9172	13.4818	24.9172	20.6228	24.9172	20.6228	24.9172	20.6228	24.9172	20.6228	24.9172	20.6228	24.9172	20.6228	24.9172	20.6228	24.9172	26.8918	24.9172	5.63858	24.9172	117.414
24.9338	10.9818	24.9338	28.6368	24.9338	28.6368	24.9338	28.6368	24.9338	28.6368	24.9338	28.6368	24.9338	28.6368	24.9338	28.6368	24.9338	26.7376	24.9338	3.41524	24.9338	126.851
24.9505	13.4819	24.9505	38.7819	24.9505	38.7819	24.9505	38.7819	24.9505	38.7819	24.9505	38.7819	24.9505	38.7819	24.9505	38.7819	24.9505	24.9945	24.9505	9.13143	24.9505	137.268
24.9672	8.48186	24.9672	36.3412	24.9672	36.3412	24.9672	36.3412	24.9672	36.3412	24.9672	36.3412	24.9672	36.3412	24.9672	36.3412	24.9672	31.3303	24.9672	6.19615	24.9672	122.653
24.9838	15.9819	24.9838	43.2832	24.9838	43.2832	24.9838	43.2832	24.9838	43.2832	24.9838	43.2832	24.9838	43.2832	24.9838	43.2832	24.9838	32.5557	24.9838	12.3434	24.9838	135.765
25.0005	19.7319	25.0005	35.6894	25.0005	35.6894	25.0005	35.6894	25.0005	35.6894	25.0005	35.6894	25.0005	35.6894	25.0005	35.6894	25.0005	29.7522	25.0005	19.8051	25.0005	137.537
25.0172	10.9819	25.0172	34.3141	25.0172	34.3141	25.0172	34.3141	25.0172	34.3141	25.0172	34.3141	25.0172	34.3141	25.0172	34.3141	25.0172	26.8772	25.0172	16.1673	25.0172	141.235
25.0338	10.9819	25.0338	42.6343	25.0338	42.6343	25.0338	42.6343	25.0338	42.6343	25.0338	42.6343	25.0338	42.6343	25.0338	42.6343	25.0338	36.0646	25.0338	16.5266	25.0338	135.076
25.0505	17.2319	25.0505	44.4057	25.0505	44.4057	25.0505	44.4057	25.0505	44.4057	25.0505	44.4057	25.0505	44.4057	25.0505	44.4057	25.0505	24.7523	25.0505	17.0298	25.0505	130.613
25.0672	19.7319	25.0672	47.2225	25.0672	47.2225	25.0672	47.2225	25.0672	47.2225	25.0672	47.2225	25.0672	47.2225	25.0672	47.2225	25.0672	31.722	25.0672	13.2233	25.0672	138.434
25.0838	32.2319	25.0838	36.4968	25.0838	36.4968	25.0838	36.4968	25.0838	36.4968	25.0838	36.4968	25.0838	36.4968	25.0838	36.4968	25.0838	39.966	25.0838	18.1288	25.0838	142.314
25.1005	22.2319	25.1005	46.0327	25.1005	46.0327	25.1005	46.0327	25.1005	46.0327	25.1005	46.0327	25.1005	46.0327	25.1005	46.0327	25.1005	34.0811	25.1005	9.90086	25.1005	144.565
25.1172	24.7319	25.1172	44.5898	25.1172	44.5898	25.1172	44.5898	25.1172	44.5898	25.1172	44.5898	25.1172	44.5898	25.1172	44.5898	25.1172	41.773	25.1172	13.3029	25.1172	141.418
25.1338	30.9819	25.1338	41.1881	25.1338	41.1881	25.1338	41.1881	25.1338	41.1881	25.1338	41.1881	25.1338	41.1881	25.1338	41.1881	25.1338	47.0326	25.1338	20.7904	25.1338	150.843
25.1505	17.2319	25.1505	38.6385	25.1505	38.6385	25.1505	38.6385	25.1505	38.6385	25.1505	38.6385	25.1505	38.6385	25.1505	38.6385	25.1505	36.9552	25.1505	16.9347	25.1505	148.984
25.1672	30.9819	25.1672	41.9809	25.1672	41.9809	25.1672	41.9809	25.1672	41.9809	25.1672	41.9809	25.1672	41.9809	25.1672	41.9809	25.1672	45.2335	25.1672	25.0569	25.1672	146.637
25.1838	35.982	25.1838	34.8961	25.1838	34.8961	25.1838	34.8961	25.1838	34.8961	25.1838	34.8961	25.1838	34.8961	25.1838	34.8961	25.1838	43.798	25.1838	14.1438	25.1838	156.394
25.2005	23.482	25.2005	30.9587	25.2005	30.9587	25.2005	30.9587	25.2005	30.9587	25.2005	30.9587	25.2005	30.9587	25.2005	30.9587	25.2005	42.1144	25.2005	23.4439	25.2005	148.229
25.2172	23.482	25.2172	39.6002	25.2172	39.6002	25.2172	39.6002	25.2172	39.6002	25.2172	39.6002	25.2172	39.6002	25.2172	39.6002	25.2172	47.6874	25.2172	26.5693	25.2172	147.094
25.2338	18.482	25.2338	55.8288	25.2338	55.8288	25.2338	55.8288	25.2338	55.8288	25.2338	55.8288	25.2338	55.8288	25.2338	55.8288	25.2338	42.5902	25.2338	26.3598	25.2338	156.103
25.2505	24.732	25.2505	49.9403	25.2505	49.9403	25.2505	49.9403	25.2505	49.9403	25.2505	49.9403	25.2505	49.9403	25.2505	49.9403	25.2505	39.3217	25.2505	21.3942	25.2505	153.883
25.2672	27.232	25.2672	33.3048	25.2672	33.3048	25.2672	33.3048	25.2672	33.3048	25.2672	33.3048	25.2672	33.3048	25.2672	33.3048	25.2672	43.3578	25.2672	15.3032	25.2672	151.017
25.2838	32.232	25.2838	50.5057	25.2838	50.5057	25.2838	50.5057	25.2838	50.5057	25.2838	50.5057	25.2838	50.5057	25.2838	50.5057	25.2838	45.1566	25.2838	19.4111	25.2838	156.749
25.3005	38.482	25.3005	38.4236	25.3005	38.4236	25.3005	38.4236	25.3005	38.4236	25.3005	38.4236	25.3005	38.4236	25.3005	38.4236	25.3005	43.8699	25.3005	15.1572	25.3005	154.616
25.3172	35.982	25.3172	36.8203	25.3172	36.8203	25.3172	36.8203	25.3172	36.8203	25.3172	36.8203	25.3172	36.8203	25.3172	36.8203	25.3172	55.6688	25.3172	23.8772	25.3172	151.522
25.3338	45.982	25.3338	38.9432	25.3338	38.9432	25.3338	38.9432	25.3338	38.9432	25.3338	38.9432	25.3338	38.9432	25.3338	38.9432	25.3338	46.9124	25.3338	22.714	25.3338	162.981
25.3505	44.732	25.3505	45.1799	25.3505	45.1799	25.3505	45.1799	25.3505	45.1799	25.3505	45.1799	25.3505	45.1799	25.3505	45.1799	25.3505	47.2841	25.3505	17.5403	25.3505	162.473
25.3672	45.982	25.3672	44.8172	25.3672	44.8172	25.3672	44.8172	25.3672	44.8172	25.3672	44.8172	25.3672	44.8172	25.3672	44.8172	25.3672	50.8419	25.3672	16.4228	25.3672	171.771
25.3838	54.732	25.3838	43.9198	25.3838	43.9198	25.3838	43.9198	25.3838	43.9198	25.3838	43.9198	25.3838	43.9198	25.3838	43.9198	25.3838	57.9854	25.3838	22.3473	25.3838	164.275
25.4005	45.982	25.4005	46.7443	25.4005	46.7443	25.4005	46.7443	25.4005	46.7443	25.4005	46.7443	25.4005	46.7443	25.4005	46.7443	25.4005	55.1102	25.4005	17.7641	25.4005	154.574
25.4172	57.2321	25.4172	47.5736	25.4172	47.5736	25.4172	47.5736	25.4172	47.5736	25.4172	47.5736	25.4172	47.5736	25.4172	47.5736	25.4172	63.2229	25.4172	12.5381	25.4172	172.446
25.4338	45.9821	25.4338	44.8538	25.4338	44.8538	25.4338	44.8538	25.4338	44.8538	25.4338	44.8538	25.4338	44.8538	25.4338	44.8538	25.4338	52.6653	25.4338	24.4513	25.4338	167.324
25.4505	37.2321	25.4505	47.0006	25.4505	47.0006	25.4505	47.0006	25.4505	47.0006	25.4505	47.0006	25.4505	47.0006	25.4505	47.0006	25.4505	58.008	25.4505	10.0507	25.4505	173.306
25.4672	67.2321	25.4672	50.965	25.4672	50.965	25.4672	50.965	25.4672	50.965	25.4672	50.965	25.4672	50.965	25.4672	50.965	25.4672	57.0598	25.4672	25.6754	25.4672	164.692
25.4838	57.2321	25.4838	46.1966	25.4838	46.1966	25.4838	46.1966	25.4838	46.1966	25.4838	46.1966	25.4838	46.1966	25.4838	46.1966	25.4838	68.7594	25.4838	23.1075	25.4838	163.088
25.5005	58.4821	25.5005	52.6142	25.5005	52.6142	25.5005	52.6142	25.5005	52.6142	25.5005	52.6142	25.5005	52.6142	25.5005	52.6142	25.5005	60.4691	25.5005	22.8446	25.5005	166.508
25.5172	55.9821	25.5172	53.0049	25.5172	53.0049	25.5172	53.0049	25.5172	53.0049	25.5172	53.0049	25.5172	53.0049	25.5172	53.0049	25.5172	67.3153	25.5172	21.8637	25.5172	179.307
25.5338	62.2321	25.5338	53.4023	25.5338	53.4023	25.5338	53.4023	25.5338	53.4023	25.5338	53.4023	25.5338	53.4023	25.5338	53.4023	25.5338	62.0933	25.5338	30.1243	25.5338	170.111
25.5505	64.7321	25.5505	52.0163	25.5505	52.0163	25.5505	52.0163	25.5505	52.0163	25.5505	52.0163	25.5505	52.0163	25.5505	52.0163	25.5505	64.3125	25.5505	25.5128	25.5505	7.69309
25.5672	58.4821	25.5672	50.6179	25.5672	50.6179	25.5672	50.6179	25.5672	50.6179	25.5672	50.6179	25.5672	50.6179	25.5672	50.6179	25.5672	64.0119	25.5672	25.5042	25.5672	8.80959
25.5838	69.7321	25.5838	58.2069	25.5838	58.2069	25.5838	58.2069	25.5838	58.2069	25.5838	58.2069	25.5838	58.2069	25.5838	58.2069	25.5838	72.2857	25.5838	26.5139	25.5838	6.46806
25.6005	60.9821	25.6005	54.6743	25.6005	54.6743	25.6005	54.6743	25.6005	54.6743	25.6005	54.6743	25.6005	54.6743	25.6005	54.6743	25.6005	73.9929	25.6005	23.3813	25.6005	-3.34868
25.6172	63.4821	25.6172	50.7832	25.6172	50.7832	25.6172	50.7832	25.6172	50.7832	25.6172	50.7832	25.6172	50.7832	25.6172	50.7832	25.6172	78.1737	25.6172	26.2394	25.6172	7.44507
25.6338	78.4821	25.6338	58.0694	25.6338	58.0694	25.6338	58.0694	25.6338	58.0694	25.6338	58.0694	25.6338	58.0694	25.6338	58.0694	25.6338	72.4671	25.6338	23.1334	25.6338	3.22857
25.6505	63.4822	25.6505	61.627	25.6505	61.627	25.6505	61.627	25.6505	61.627	25.6505	61.627	25.6505	61.627	25.6505	61.627	25.6505	74.288	25.6505	23.3293	25.6505	13.5975
25.6672	64.7322	25.6672	48.1058	25.6672	48.1058	25.6672	48.1058	25.6672	48.1058	25.6672	48.1058	25.6672	48.1058	25.6672	48.1058	25.6672	87.1733	25.6672	33.0359	25.6672	7.57625
25.6838	62.2322	25.6838	63.2146	25.6838	63.2146	25.6838	63.2146	25.6838	63.2146	25.6838	63.2146	25.6838	63.2146	25.6838	63.2146	25.6838	83.443	25.6838	25.5955	25.6838	10.8293
25.7005	57.2322	25.7005	51.1065	25.7005	51.1065	25.7005	51.1065	25.7005	51.1065	25.7005	51.1065	25.7005	51.1065	25.7005	51.1065	25.7005	79.1981	25.7005	29.198	25.7005	7.01219
25.7172	57.2322	25.7172	60.3387	25.7172	60.3387	25.7172	60.3387	25.7172	60.3387	25.7172	60.3387	25.7172	60.3387	25.7172	60.3387	25.7172	78.3186	25.7172	33.2276	25.7172	11.6649
25.7338	64.7322	25.7338	57.6883	25.7338	57.6883	25.7338	57.6883	25.7338	57.6883	25.7338	57.6883	25.7338	57.6883	25.7338	57.6883	25.7338	74.4019	25.7338	33.044	25.7338	5.49311
25.7505	75.9822	25.7505	62.6601	25.7505	62.6601	25.7505	62.6601	25.7505	62.6601	25.7505	62.6601	25.7505	62.6601	25.7505	62.6601	25.7505	68.0341	25.7505	35.8236	25.7505	6.42651
25.7672	82.2322	25.7672	70.024	25.7672	70.024	25.7672	70.024	25.7672	70.024	25.7672	70.024	25.7672	70.024	25.7672	70.024	25.7672	71.9051	25.7672	33.4832	25.7672	22.1138
25.7838	84.7322	25.7838	60.702	25.7838	60.702	25.7838	60.702	25.7838	60.702	25.7838	60.702	25.7838	60.702	25.7838	60.702	25.7838	79.1215	25.7838	35.4005	25.7838	14.2314
25.8005	80.9822	25.8005	62.9714	25.8005	62.9714	25.8005	62.9714	25.8005	62.9714	25.8005	62.9714	25.8005	62.9714	25.8005	62.9714	25.8005	78.6438	25.8005	32.5476	25.8005	13.5922
25.8172	80.9822	25.8172	67.5312	25.8172	67.5312	25.8172	67.5312	25.8172	67.5312	25.8172	67.5312	25.8172	67.5312	25.8172	67.5312	25.8172	80.6204	25.8172	29.6692	25.8172	16.7801
25.8339	85.9822	25.8339	67.308	25.8339	67.308	25.8339	67.308	25.8339	67.308	25.8339	67.308	25.8339	67.308	25.8339	67.308	25.8339	88.7913	25.8339	40.0997	25.8339	19.9555
25.8505	84.7322	25.8505	60.4081	25.8505	60.4081	25.8505	60.4081	25.8505	60.4081	25.8505	60.4081	25.8505	60.4081	25.8505	60.4081	25.8505	80.2121	25.8505	37.8467	25.8505	17.3296
25.8672	79.7323	25.8672	72.4141	25.8672	72.4141	25.8672	72.4141	25.8672	72.4141	25.8672	72.4141	25.8672	72.4141	25.8672	72.4141	25.8672	82.1389	25.8672	27.823	25.8672	18.9412
25.8839	74.7323	25.8839	66.6152	25.8839	66.6152	25.8839	66.6152	25.8839	66.6152	25.8839	66.6152	25.8839	66.6152	25.8839	66.6152	25.8839	85.6709	25.8839	35.7187	25.8839	19.0445
25.9005	77.2323	25.9005	68.4235	25.9005	68.4235	25.9005	68.4235	25.9005	68.4235	25.9005	68.4235	25.9005	68.4235	25.9005	68.4235	25.9005	87.9903	25.9005	35.5448	25.9005	14.3114
25.9172	67.2323	25.9172	72.3476	25.9172	72.3476	25.9172	72.3476	25.9172	72.3476	25.9172	72.3476	25.9172	72.3476	25.9172	72.3476	25.9172	86.8031	25.9172	34.2426	25.9172	20.5592
25.9339	82.2323	25.9339	78.1301	25.9339	78.1301	25.9339	78.1301	25.9339	78.1301	25.9339	78.1301	25.9339	78.1301	25.9339	78.1301	25.9339	84.0225	25.9339	39.7915	25.9339	13.207
25.9505	80.9823	25.9505	73.9124	25.9505	73.9124	25.9505	73.9124	25.9505	73.9124	25.9505	73.9124	25.9505	73.9124	25.9505	73.9124	25.9505	77.4443	25.9505	42.5434	25.9505	32.9615
25.9672	77.2323	25.9672	75.6284	25.9672	75.6284	25.9672	75.6284	25.9672	75.6284	25.9672	75.6284	25.9672	75.6284	25.9672	75.6284	25.9672	84.5536	25.9672	49.2327	25.9672	11.9769
25.9839	82.2323	25.9839	85.2496	25.9839	85.2496	25.9839	85.2496	25.9839	85.2496	25.9839	85.2496	25.9839	85.2496	25.9839	85.2496	25.9839	87.7054	25.9839	47.266	25.9839	23.9651
26.0005	79.7323	26.0005	64.8948	26.0005	64.8948	26.0005	64.8948	26.0005	64.8948	26.0005	64.8948	26.0005	64.8948	26.0005	64.8948	26.0005	83.1538	26.0005	49.6647	26.0005	28.554
26.0172	88.4823	26.0172	77.8385	26.0172	77.8385	26.0172	77.8385	26.0172	77.8385	26.0172	77.8385	26.0172	77.8385	26.0172	77.8385	26.0172	83.2775	26.0172	53.0729	26.0172	29.5987
26.0339	90.9823	26.0339	79.7769	26.0339	79.7769	26.0339	79.7769	26.0339	79.7769	26.0339	79.7769	26.0339	79.7769	26.0339	79.7769	26.0339	87.8763	26.0339	48.561	26.0339	14.053
26.0505	82.2323	26.0505	70.9215	26.0505	70.9215	26.0505	70.9215	26.0505	70.9215	26.0505	70.9215	26.0505	70.9215	26.0505	70.9215	26.0505	97.4594	26.0505	54.4419	26.0505	21.4276
26.0672	75.9823	26.0672	70.1664	26.0672	70.1664	26.0672	70.1664	26.0672	70.1664	26.0672	70.1664	26.0672	70.1664	26.0672	70.1664	26.0672	96.464	26.0672	57.4798	26.0672	30.1555
26.0839	77.2323	26.0839	74.8105	26.0839	74.8105	26.0839	74.8105	26.0839	74.8105	26.0839	74.8105	26.0839	74.8105	26.0839	74.8105	26.0839	97.8622	26.0839	58.9373	26.0839	15.8619
26.1005	78.4824	26.1005	70.1441	26.1005	70.1441	26.1005	70.1441	26.1005	70.1441	26.1005	70.1441	26.1005	70.1441	26.1005	70.1441	26.1005	88.4561	26.1005	53.6864	26.1005	37.3798
26.1172	73.4824	26.1172	80.2192	26.1172	80.2192	26.1172	80.2192	26.1172	80.2192	26.1172	80.2192	26.1172	80.2192	26.1172	80.2192	26.1172	86.2822	26.1172	61.0508	26.1172	38.3951
26.1339	74.7324	26.1339	90.3015	26.1339	90.3015	26.1339	90.3015	26.1339	90.3015	26.1339	90.3015	26.1339	90.3015	26.1339	90.3015	26.1339	87.3409	26.1339	52.0203	26.1339	32.4982
26.1505	87.2324	26.1505	80.389	26.1505	80.389	26.1505	80.389	26.1505	80.389	26.1505	80.389	26.1505	80.389	26.1505	80.389	26.1505	94.6427	26.1505	54.0708	26.1505	42.555
26.1672	80.9824	26.1672	78.7606	26.1672	78.7606	26.1672	78.7606	26.1672	78.7606	26.1672	78.7606	26.1672	78.7606	26.1672	78.7606	26.1672	98.7752	26.1672	53.2654	26.1672	40.8889
26.1839	78.4824	26.1839	88.0073	26.1839	88.0073	26.1839	88.0073	26.1839	88.0073	26.1839	88.0073	26.1839	88.0073	26.1839	88.0073	26.1839	86.4745	26.1839	60.5769	26.1839	28.9055
26.2005	77.2324	26.2005	84.611	26.2005	84.611	26.2005	84.611	26.2005	84.611	26.2005	84.611	26.2005	84.611	26.2005	84.611	26.2005	89.5868	26.2005	51.7374	26.2005	38.4433
26.2172	78.4824	26.2172	79.6451	26.2172	79.6451	26.2172	79.6451	26.2172	79.6451	26.2172	79.6451	26.2172	79.6451	26.2172	79.6451	26.2172	87.0952	26.2172	57.8833	26.2172	38.3873
26.2339	90.9824	26.2339	88.4997	26.2339	88.4997	26.2339	88.4997	26.2339	88.4997	26.2339	88.4997	26.2339	88.4997	26.2339	88.4997	26.2339	97.0973	26.2339	58.5107	26.2339	41.0544
26.2505	83.4824	26.2505	80.2758	26.2505	80.2758	26.2505	80.2758	26.2505	80.2758	26.2505	80.2758	26.2505	80.2758	26.2505	80.2758	26.2505	104.302	26.2505	60.1932	26.2505	50.271
26.2672	78.4824	26.2672	80.5871	26.2672	80.5871	26.2672	80.5871	26.2672	80.5871	26.2672	80.5871	26.2672	80.5871	26.2672	80.5871	26.2672	86.0679	26.2672	62.2841	26.2672	34.36
26.2839	87.2324	26.2839	72.4592	26.2839	72.4592	26.2839	72.4592	26.2839	72.4592	26.2839	72.4592	26.2839	72.4592	26.2839	72.4592	26.2839	94.0886	26.2839	71.2224	26.2839	41.8064
26.3005	80.9824	26.3005	79.401	26.3005	79.401	26.3005	79.401	26.3005	79.401	26.3005	79.401	26.3005	79.401	26.3005	79.401	26.3005	101.765	26.3005	66.182	26.3005	38.0615
26.3172	92.2324	26.3172	80.7247	26.3172	80.7247	26.3172	80.7247	26.3172	80.7247	26.3172	80.7247	26.3172	80.7247	26.3172	80.7247	26.3172	86.9255	26.3172	66.7743	26.3172	29.7853
26.3339	75.9825	26.3339	79.127	26.3339	79.127	26.3339	79.127	26.3339	79.127	26.3339	79.127	26.3339	79.127	26.3339	79.127	26.3339	93.7897	26.3339	64.6122	26.3339	36.9109
26.3505	78.4825	26.3505	86.5202	26.3505	86.5202	26.3505	86.5202	26.3505	86.5202	26.3505	86.5202	26.3505	86.5202	26.3505	86.5202	26.3505	99.6563	26.3505	69.2682	26.3505	39.6737
26.3672	70.9825	26.3672	89.383	26.3672	89.383	26.3672	89.383	26.3672	89.383	26.3672	89.383	26.3672	89.383	26.3672	89.383	26.3672	99.5311	26.3672	70.719	26.3672	32.6009
26.3839	83.4825	26.3839	92.8906	26.3839	92.8906	26.3839	92.8906	26.3839	92.8906	26.3839	92.8906	26.3839	92.8906	26.3839	92.8906	26.3839	102.355	26.3839	63.6328	26.3839	34.0704
26.4005	77.2325	26.4005	90.7964	26.4005	90.7964	26.4005	90.7964	26.4005	90.7964	26.4005	90.7964	26.4005	90.7964	26.4005	90.7964	26.4005	100.962	26.4005	67.513	26.4005	31.6574
26.4172	85.9825	26.4172	81.7458	26.4172	81.7458	26.4172	81.7458	26.4172	81.7458	26.4172	81.7458	26.4172	81.7458	26.4172	81.7458	26.4172	96.8326	26.4172	84.0895	26.4172	37.1814
26.4339	84.7325	26.4339	90.2082	26.4339	90.2082	26.4339	90.2082	26.4339	90.2082	26.4339	90.2082	26.4339	90.2082	26.4339	90.2082	26.4339	89.1279	26.4339	74.7967	26.4339	41.133
26.4505	77.2325	26.4505	87.274	26.4505	87.274	26.4505	87.274	26.4505	87.274	26.4505	87.274	26.4505	87.274	26.4505	87.274	26.4505	90.3969	26.4505	75.0738	26.4505	44.3984
26.4672	80.9825	26.4672	89.4456	26.4672	89.4456	26.4672	89.4456	26.4672	89.4456	26.4672	89.4456	26.4672	89.4456	26.4672	89.4456	26.4672	98.0765	26.4672	81.031	26.4672	45.8086
26.4839	73.4825	26.4839	89.3133	26.4839	89.3133	26.4839	89.3133	26.4839	89.3133	26.4839	89.3133	26.4839	89.3133	26.4839	89.3133	26.4839	96.3759	26.4839	78.7796	26.4839	55.4613
26.5005	82.2325	26.5005	88.2195	26.5005	88.2195	26.5005	88.2195	26.5005	88.2195	26.5005	88.2195	26.5005	88.2195	26.5005	88.2195	26.5005	101.11	26.5005	85.1151	26.5005	50.083
26.5172	83.4825	26.5172	84.7106	26.5172	84.7106	26.5172	84.7106	26.5172	84.7106	26.5172	84.7106	26.5172	84.7106	26.5172	84.7106	26.5172	97.3179	26.5172	70.8156	26.5172	54.8631
26.5339	85.9825	26.5339	97.8458	26.5339	97.8458	26.5339	97.8458	26.5339	97.8458	26.5339	97.8458	26.5339	97.8458	26.5339	97.8458	26.5339	100.72	26.5339	78.1758	26.5339	43.8188
26.5505	89.7325	26.5505	95.5232	26.5505	95.5232	26.5505	95.5232	26.5505	95.5232	26.5505	95.5232	26.5505	95.5232	26.5505	95.5232	26.5505	98.6512	26.5505	80.6612	26.5505	47.0718
26.5672	88.4826	26.5672	95.3751	26.5672	95.3751	26.5672	95.3751	26.5672	95.3751	26.5672	95.3751	26.5672	95.3751	26.5672	95.3751	26.5672	105.852	26.5672	85.9099	26.5672	53.7162
26.5839	94.7326	26.5839	96.1092	26.5839	96.1092	26.5839	96.1092	26.5839	96.1092	26.5839	96.1092	26.5839	96.1092	26.5839	96.1092	26.5839	104.3	26.5839	82.2029	26.5839	53.3631
26.6005	88.4826	26.6005	93.6027	26.6005	93.6027	26.6005	93.6027	26.6005	93.6027	26.6005	93.6027	26.6005	93.6027	26.6005	93.6027	26.6005	97.8547	26.6005	91.1395	26.6005	46.016
26.6172	98.4826	26.6172	97.3075	26.6172	97.3075	26.6172	97.3075	26.6172	97.3075	26.6172	97.3075	26.6172	97.3075	26.6172	97.3075	26.6172	107.412	26.6172	88.5201	26.6172	45.4782
26.6339	92.2326	26.6339	94.6894	26.6339	94.6894	26.6339	94.6894	26.6339	94.6894	26.6339	94.6894	26.6339	94.6894	26.6339	94.6894	26.6339	102.234	26.6339	91.4357	26.6339	49.8627
26.6505	75.9826	26.6505	95.3689	26.6505	95.3689	26.6505	95.3689	26.6505	95.3689	26.6505	95.3689	26.6505	95.3689	26.6505	95.3689	26.6505	108.624	26.6505	78.3235	26.6505	57.6178
26.6672	82.2326	26.6672	104.18	26.6672	104.18	26.6672	104.18	26.6672	104.18	26.6672	104.18	26.6672	104.18	26.6672	104.18	26.6672	100.294	26.6672	77.1444	26.6672	53.6863
26.6839	89.7326	26.6839	106.374	26.6839	106.374	26.6839	106.374	26.6839	106.374	26.6839	106.374	26.6839	106.374	26.6839	106.374	26.6839	108.324	26.6839	85.6735	26.6839	52.3935
26.7005	88.4826	26.7005	99.6784	26.7005	99.6784	26.7005	99.6784	26.7005	99.6784	26.7005	99.6784	26.7005	99.6784	26.7005	99.6784	26.7005	113.06	26.7005	84.6	26.7005	59.4493
26.7172	93.4826	26.7172	103.023	26.7172	103.023	26.7172	103.023	26.7172	103.023	26.7172	103.023	26.7172	103.023	26.7172	103.023	26.7172	110.661	26.7172	80.9888	26.7172	60.1726
26.7339	95.9826	26.7339	103.42	26.7339	103.42	26.7339	103.42	26.7339	103.42	26.7339	103.42	26.7339	103.42	26.7339	103.42	26.7339	110.778	26.7339	82.3381	26.7339	52.9048
26.7505	92.2326	26.7505	101.468	26.7505	101.468	26.7505	101.468	26.7505	101.468	26.7505	101.468	26.7505	101.468	26.7505	101.468	26.7505	120.574	26.7505	89.9664	26.7505	50.3213
26.7672	93.4826	26.7672	100.999	26.7672	100.999	26.7672	100.999	26.7672	100.999	26.7672	100.999	26.7672	100.999	26.7672	100.999	26.7672	110.15	26.7672	86.7676	26.7672	53.534
26.7839	100.983	26.7839	105.737	26.7839	105.737	26.7839	105.737	26.7839	105.737	26.7839	105.737	26.7839	105.737	26.7839	105.737	26.7839	122.88	26.7839	95.5484	26.7839	68.1745
26.8005	94.7327	26.8005	104.167	26.8005	104.167	26.8005	104.167	26.8005	104.167	26.8005	104.167	26.8005	104.167	26.8005	104.167	26.8005	114.222	26.8005	90.5627	26.8005	63.9177
26.8172	92.2327	26.8172	105.641	26.8172	105.641	26.8172	105.641	26.8172	105.641	26.8172	105.641	26.8172	105.641	26.8172	105.641	26.8172	120.104	26.8172	81.6691	26.8172	59.1685
26.8339	97.2327	26.8339	106.064	26.8339	106.064	26.8339	106.064	26.8339	106.064	26.8339	106.064	26.8339	106.064	26.8339	106.064	26.8339	118.961	26.8339	89.5054	26.8339	72.9925
26.8505	104.733	26.8505	97.2913	26.8505	97.2913	26.8505	97.2913	26.8505	97.2913	26.8505	97.2913	26.8505	97.2913	26.8505	97.2913	26.8505	121.223	26.8505	86.9523	26.8505	75.8451
26.8672	109.733	26.8672	98.4185	26.8672	98.4185	26.8672	98.4185	26.8672	98.4185	26.8672	98.4185	26.8672	98.4185	26.8672	98.4185	26.8672	123.711	26.8672	85.5769	26.8672	66.8993
26.8839	98.4827	26.8839	100.503	26.8839	100.503	26.8839	100.503	26.8839	100.503	26.8839	100.503	26.8839	100.503	26.8839	100.503	26.8839	130.995	26.8839	81.0786	26.8839	69.4988
26.9005	100.983	26.9005	109.937	26.9005	109.937	26.9005	109.937	26.9005	109.937	26.9005	109.937	26.9005	109.937	26.9005	109.937	26.9005	130.095	26.9005	89.8851	26.9005	58.8411
26.9172	95.9827	26.9172	101.404	26.9172	101.404	26.9172	101.404	26.9172	101.404	26.9172	101.404	26.9172	101.404	26.9172	101.404	26.9172	126.586	26.9172	82.2766	26.9172	70.4403
26.9339	97.2327	26.9339	98.5491	26.9339	98.5491	26.9339	98.5491	26.9339	98.5491	26.9339	98.5491	26.9339	98.5491	26.9339	98.5491	26.9339	139.8	26.9339	84.4305	26.9339	74.9371
26.9505	100.983	26.9505	107.372	26.9505	107.372	26.9505	107.372	26.9505	107.372	26.9505	107.372	26.9505	107.372	26.9505	107.372	26.9505	131.459	26.9505	78.711	26.9505	79.5732
26.9672	98.4827	26.9672	101.242	26.9672	101.242	26.9672	101.242	26.9672	101.242	26.9672	101.242	26.9672	101.242	26.9672	101.242	26.9672	123.126	26.9672	82.506	26.9672	72.3255
26.9839	104.733	26.9839	107.301	26.9839	107.301	26.9839	107.301	26.9839	107.301	26.9839	107.301	26.9839	107.301	26.9839	107.301	26.9839	133.012	26.9839	89.0075	26.9839	78.8197
27.0005	105.983	27.0005	98.1748	27.0005	98.1748	27.0005	98.1748	27.0005	98.1748	27.0005	98.1748	27.0005	98.1748	27.0005	98.1748	27.0005	131.081	27.0005	84.6461	27.0005	74.2401
27.0172	102.233	27.0172	108.005	27.0172	108.005	27.0172	108.005	27.0172	108.005	27.0172	108.005	27.0172	108.005	27.0172	108.005	27.0172	127.445	27.0172	81.2842	27.0172	78.3554
27.0339	109.733	27.0339	103.672	27.0339	103.672	27.0339	103.672	27.0339	103.672	27.0339	103.672	27.0339	103.672	27.0339	103.672	27.0339	128.019	27.0339	77.9362	27.0339	76.9034
27.0505	92.2328	27.0505	109.969	27.0505	109.969	27.0505	109.969	27.0505	109.969	27.0505	109.969	27.0505	109.969	27.0505	109.969	27.0505	121.805	27.0505	78.8673	27.0505	83.3988
27.0672	97.2328	27.0672	109.397	27.0672	109.397	27.0672	109.397	27.0672	109.397	27.0672	109.397	27.0672	109.397	27.0672	109.397	27.0672	137.538	27.0672	89.4823	27.0672	79.9153
27.0839	100.983	27.0839	111.301	27.0839	111.301	27.0839	111.301	27.0839	111.301	27.0839	111.301	27.0839	111.301	27.0839	111.301	27.0839	135.888	27.0839	79.7736	27.0839	81.5523
27.1005	97.2328	27.1005	117.495	27.1005	117.495	27.1005	117.495	27.1005	117.495	27.1005	117.495	27.1005	117.495	27.1005	117.495	27.1005	139.2	27.1005	84.9949	27.1005	82.7962
27.1172	92.2328	27.1172	117.306	27.1172	117.306	27.1172	117.306	27.1172	117.306	27.1172	117.306	27.1172	117.306	27.1172	117.306	27.1172	138.453	27.1172	86.8915	27.1172	84.2763
27.1339	108.483	27.1339	117.777	27.1339	117.777	27.1339	117.777	27.1339	117.777	27.1339	117.777	27.1339	117.777	27.1339	117.777	27.1339	131.899	27.1339	82.3043	27.1339	80.9622
27.1505	103.483	27.1505	125.283	27.1505	125.283	27.1505	125.283	27.1505	125.283	27.1505	125.283	27.1505	125.283	27.1505	125.283	27.1505	133.575	27.1505	75.7191	27.1505	80.5961
27.1672	90.9828	27.1672	113.218	27.1672	113.218	27.1672	113.218	27.1672	113.218	27.1672	113.218	27.1672	113.218	27.1672	113.218	27.1672	150.841	27.1672	80.5687	27.1672	84.3405
27.1839	115.983	27.1839	117.918	27.1839	117.918	27.1839	117.918	27.1839	117.918	27.1839	117.918	27.1839	117.918	27.1839	117.918	27.1839	148.159	27.1839	81.6235	27.1839	85.7797
27.2005	100.983	27.2005	115.871	27.2005	115.871	27.2005	115.871	27.2005	115.871	27.2005	115.871	27.2005	115.871	27.2005	115.871	27.2005	141.084	27.2005	85.6638	27.2005	87.1827
27.2172	113.483	27.2172	119.473	27.2172	119.473	27.2172	119.473	27.2172	119.473	27.2172	119.473	27.2172	119.473	27.2172	119.473	27.2172	150.587	27.2172	76.5188	27.2172	77.7764
27.2339	103.483	27.2339	117.834	27.2339	117.834	27.2339	117.834	27.2339	117.834	27.2339	117.834	27.2339	117.834	27.2339	117.834	27.2339	142.987	27.2339	85.4138	27.2339	95.6133
27.2505	110.983	27.2505	116.244	27.2505	116.244	27.2505	116.244	27.2505	116.244	27.2505	116.244	27.2505	116.244	27.2505	116.244	27.2505	153.772	27.2505	87.9272	27.2505	86.416
27.2672	109.733	27.2672	128.911	27.2672	128.911	27.2672	128.911	27.2672	128.911	27.2672	128.911	27.2672	128.911	27.2672	128.911	27.2672	151.99	27.2672	82.2315	27.2672	81.427
27.2839	113.483	27.2839	132.61	27.2839	132.61	27.2839	132.61	27.2839	132.61	27.2839	132.61	27.2839	132.61	27.2839	132.61	27.2839	157.13	27.2839	80.6128	27.2839	79.3229
27.3005	114.733	27.3005	123.829	27.3005	123.829	27.3005	123.829	27.3005	123.829	27.3005	123.829	27.3005	123.829	27.3005	123.829	27.3005	149.61	27.3005	70.6463	27.3005	79.6711
27.3172	107.233	27.3172	120.786	27.3172	120.786	27.3172	120.786	27.3172	120.786	27.3172	120.786	27.3172	120.786	27.3172	120.786	27.3172	157.705	27.3172	90.5428	27.3172	95.0035
27.3339	112.233	27.3339	130.64	27.3339	130.64	27.3339	130.64	27.3339	130.64	27.3339	130.64	27.3339	130.64	27.3339	130.64	27.3339	164.126	27.3339	79.9188	27.3339	74.7166
27.3505	108.483	27.3505	126.23	27.3505	126.23	27.3505	126.23	27.3505	126.23	27.3505	126.23	27.3505	126.23	27.3505	126.23	27.3505	148.107	27.3505	82.6418	27.3505	86.1366
27.3672	122.233	27.3672	134.921	27.3672	134.921	27.3672	134.921	27.3672	134.921	27.3672	134.921	27.3672	134.921	27.3672	134.921	27.3672	159.369	27.3672	91.9234	27.3672	84.7809
27.3839	124.733	27.3839	130.433	27.3839	130.433	27.3839	130.433	27.3839	130.433	27.3839	130.433	27.3839	130.433	27.3839	130.433	27.3839	157.833	27.3839	88.6108	27.3839	79.6134
27.4005	112.233	27.4005	135.3	27.4005	135.3	27.4005	135.3	27.4005	135.3	27.4005	135.3	27.4005	135.3	27.4005	135.3	27.4005	168.729	27.4005	71.273	27.4005	79.8732
27.4172	124.733	27.4172	129.277	27.4172	129.277	27.4172	129.277	27.4172	129.277	27.4172	129.277	27.4172	129.277	27.4172	129.277	27.4172	162.75	27.4172	84.2316	27.4172	78.0162
27.4339	125.983	27.4339	128.295	27.4339	128.295	27.4339	128.295	27.4339	128.295	27.4339	128.295	27.4339	128.295	27.4339	128.295	27.4339	158.48	27.4339	88.6274	27.4339	80.772
27.4505	137.233	27.4505	129.911	27.4505	129.911	27.4505	129.911	27.4505	129.911	27.4505	129.911	27.4505	129.911	27.4505	129.911	27.4505	170.697	27.4505	72.1668	27.4505	85.7812
27.4672	129.733	27.4672	134.727	27.4672	134.727	27.4672	134.727	27.4672	134.727	27.4672	134.727	27.4672	134.727	27.4672	134.727	27.4672	153.61	27.4672	83.8672	27.4672	78.9831
27.4839	129.733	27.4839	133.717	27.4839	133.717	27.4839	133.717	27.4839	133.717	27.4839	133.717	27.4839	133.717	27.4839	133.717	27.4839	167.513	27.4839	86.5952	27.4839	85.5271
27.5006	138.483	27.5006	135.931	27.5006	135.931	27.5006	135.931	27.5006	135.931	27.5006	135.931	27.5006	135.931	27.5006	135.931	27.5006	160.573	27.5006	79.62	27.5006	78.7876
27.5172	132.233	27.5172	144.565	27.5172	144.565	27.5172	144.565	27.5172	144.565	27.5172	144.565	27.5172	144.565	27.5172	144.565	27.5172	163.493	27.5172	87.9782	27.5172	79.2375
27.5339	137.233	27.5339	143.078	27.5339	143.078	27.5339	143.078	27.5339	143.078	27.5339	143.078	27.5339	143.078	27.5339	143.078	27.5339	163.373	27.5339	79.3801	27.5339	82.236
27.5506	142.233	27.5506	136.214	27.5506	136.214	27.5506	136.214	27.5506	136.214	27.5506	136.214	27.5506	136.214	27.5506	136.214	27.5506	160.081	27.5506	77.9149	27.5506	86.8078
27.5672	134.733	27.5672	143.231	27.5672	143.231	27.5672	143.231	27.5672	143.231	27.5672	143.231	27.5672	143.231	27.5672	143.231	27.5672	178.672	27.5672	83.1414	27.5672	87.4403
27.5839	140.983	27.5839	138.184	27.5839	138.184	27.5839	138.184	27.5839	138.184	27.5839	138.184	27.5839	138.184	27.5839	138.184	27.5839	176.102	27.5839	84.1753	27.5839	79.0237
27.6006	143.483	27.6006	149.183	27.6006	149.183	27.6006	149.183	27.6006	149.183	27.6006	149.183	27.6006	149.183	27.6006	149.183	27.6006	-0.933973	27.6006	76.5459	27.6006	84.1464
27.6172	149.733	27.6172	138.315	27.6172	138.315	27.6172	138.315	27.6172	138.315	27.6172	138.315	27.6172	138.315	27.6172	138.315	27.6172	1.5337	27.6172	88.6891	27.6172	81.7406
27.6339	142.233	27.6339	135.928	27.6339	135.928	27.6339	135.928	27.6339	135.928	27.6339	135.928	27.6339	135.928	27.6339	135.928	27.6339	8.26118	27.6339	87.7101	27.6339	77.5339
27.6506	134.733	27.6506	143.814	27.6506	143.814	27.6506	143.814	27.6506	143.814	27.6506	143.814	27.6506	143.814	27.6506	143.814	27.6506	6.7169	27.6506	82.3574	27.6506	96.5116
27.6672	150.983	27.6672	146.402	27.6672	146.402	27.6672	146.402	27.6672	146.402	27.6672	146.402	27.6672	146.402	27.6672	146.402	27.6672	19.0278	27.6672	84.376	27.6672	81.9363
27.6839	140.983	27.6839	140.779	27.6839	140.779	27.6839	140.779	27.6839	140.779	27.6839	140.779	27.6839	140.779	27.6839	140.779	27.6839	12.7631	27.6839	82.1685	27.6839	81.8961
27.7006	147.233	27.7006	143.524	27.7006	143.524	27.7006	143.524	27.7006	143.524	27.7006	143.524	27.7006	143.524	27.7006	143.524	27.7006	9.12655	27.7006	85.0175	27.7006	76.3134
27.7172	145.983	27.7172	144.322	27.7172	144.322	27.7172	144.322	27.7172	144.322	27.7172	144.322	27.7172	144.322	27.7172	144.322	27.7172	10.681	27.7172	82.9223	27.7172	79.7749
27.7339	139.733	27.7339	149.082	27.7339	149.082	27.7339	149.082	27.7339	149.082	27.7339	149.082	27.7339	149.082	27.7339	149.082	27.7339	10.2739	27.7339	85.2012	27.7339	76.2113
27.7506	143.483	27.7506	147.107	27.7506	147.107	27.7506	147.107	27.7506	147.107	27.7506	147.107	27.7506	147.107	27.7506	147.107	27.7506	8.24175	27.7506	90.8413	27.7506	78.7704
27.7672	155.983	27.7672	150.16	27.7672	150.16	27.7672	150.16	27.7672	150.16	27.7672	150.16	27.7672	150.16	27.7672	150.16	27.7672	10.3229	27.7672	78.9669	27.7672	87.7347
27.7839	163.483	27.7839	157.446	27.7839	157.446	27.7839	157.446	27.7839	157.446	27.7839	157.446	27.7839	157.446	27.7839	157.446	27.7839	21.4189	27.7839	74.6323	27.7839	77.036
27.8006	137.233	27.8006	158.361	27.8006	158.361	27.8006	158.361	27.8006	158.361	27.8006	158.361	27.8006	158.361	27.8006	158.361	27.8006	12.5244	27.8006	88.2417	27.8006	85.4437
27.8172	147.233	27.8172	155.072	27.8172	155.072	27.8172	155.072	27.8172	155.072	27.8172	155.072	27.8172	155.072	27.8172	155.072	27.8172	8.39829	27.8172	84.8453	27.8172	85.6259
27.8339	143.483	27.8339	166.133	27.8339	166.133	27.8339	166.133	27.8339	166.133	27.8339	166.133	27.8339	166.133	27.8339	166.133	27.8339	23.3006	27.8339	89.0994	27.8339	77.0419
27.8506	147.233	27.8506	157.755	27.8506	157.755	27.8506	157.755	27.8506	157.755	27.8506	157.755	27.8506	157.755	27.8506	157.755	27.8506	20.6432	27.8506	74.8104	27.8506	77.4479
27.8672	135.983	27.8672	167.164	27.8672	167.164	27.8672	167.164	27.8672	167.164	27.8672	167.164	27.8672	167.164	27.8672	167.164	27.8672	24.0257	27.8672	88.603	27.8672	80.3381
27.8839	148.483	27.8839	168.263	27.8839	168.263	27.8839	168.263	27.8839	168.263	27.8839	168.263	27.8839	168.263	27.8839	168.263	27.8839	27.945	27.8839	78.688	27.8839	85.8962
27.9006	153.483	27.9006	155.083	27.9006	155.083	27.9006	155.083	27.9006	155.083	27.9006	155.083	27.9006	155.083	27.9006	155.083	27.9006	12.9671	27.9006	76.3408	27.9006	87.9808
27.9172	159.733	27.9172	160.914	27.9172	160.914	27.9172	160.914	27.9172	160.914	27.9172	160.914	27.9172	160.914	27.9172	160.914	27.9172	19.2135	27.9172	89.2684	27.9172	78.2239
27.9339	155.983	27.9339	164.512	27.9339	164.512	27.9339	164.512	27.9339	164.512	27.9339	164.512	27.9339	164.512	27.9339	164.512	27.9339	27.3762	27.9339	79.0196	27.9339	85.1975
27.9506	150.983	27.9506	153.808	27.9506	153.808	27.9506	153.808	27.9506	153.808	27.9506	153.808	27.9506	153.808	27.9506	153.808	27.9506	9.16137	27.9506	82.9558	27.9506	89.7686
27.9672	150.983	27.9672	162.488	27.9672	162.488	27.9672	162.488	27.9672	162.488	27.9672	162.488	27.9672	162.488	27.9672	162.488	27.9672	22.458	27.9672	81.4507	27.9672	82.471
27.9839	149.733	27.9839	158.75	27.9839	158.75	27.9839	158.75	27.9839	158.75	27.9839	158.75	27.9839	158.75	27.9839	158.75	27.9839	21.9675	27.9839	90.3106	27.9839	80.9098
28.0006	157.233	28.0006	170.2	28.0006	170.2	28.0006	170.2	28.0006	170.2	28.0006	170.2	28.0006	170.2	28.0006	170.2	28.0006	21.2847	28.0006	94.7258	28.0006	93.0385
28.0172	157.233	28.0172	160.989	28.0172	160.989	28.0172	160.989	28.0172	160.989	28.0172	160.989	28.0172	160.989	28.0172	160.989	28.0172	19.8513	28.0172	90.5582	28.0172	84.4855
28.0339	158.483	28.0339	160.238	28.0339	160.238	28.0339	160.238	28.0339	160.238	28.0339	160.238	28.0339	160.238	28.0339	160.238	28.0339	16.7331	28.0339	91.9147	28.0339	71.9808
28.0506	155.983	28.0506	162.574	28.0506	162.574	28.0506	162.574	28.0506	162.574	28.0506	162.574	28.0506	162.574	28.0506	162.574	28.0506	18.6368	28.0506	92.9155	28.0506	86.2897
28.0672	169.733	28.0672	158.701	28.0672	158.701	28.0672	158.701	28.0672	158.701	28.0672	158.701	28.0672	158.701	28.0672	158.701	28.0672	23.522	28.0672	95.6734	28.0672	82.5978
28.0839	165.983	28.0839	162.555	28.0839	162.555	28.0839	162.555	28.0839	162.555	28.0839	162.555	28.0839	162.555	28.0839	162.555	28.0839	17.7407	28.0839	99.3354	28.0839	83.2117
28.1006	152.233	28.1006	172.772	28.1006	172.772	28.1006	172.772	28.1006	172.772	28.1006	172.772	28.1006	172.772	28.1006	172.772	28.1006	28.3747	28.1006	100.263	28.1006	74.8499
28.1172	155.983	28.1172	175.889	28.1172	175.889	28.1172	175.889	28.1172	175.889	28.1172	175.889	28.1172	175.889	28.1172	175.889	28.1172	30.4805	28.1172	102.65	28.1172	81.0966
28.1339	149.733	28.1339	167.215	28.1339	167.215	28.1339	167.215	28.1339	167.215	28.1339	167.215	28.1339	167.215	28.1339	167.215	28.1339	27.6305	28.1339	100.793	28.1339	73.4387
28.1506	160.983	28.1506	167.521	28.1506	167.521	28.1506	167.521	28.1506	167.521	28.1506	167.521	28.1506	167.521	28.1506	167.521	28.1506	25.692	28.1506	99.608	28.1506	90.8933
28.1672	-0.608837	28.1672	169.391	28.1672	169.391	28.1672	169.391	28.1672	169.391	28.1672	169.391	28.1672	169.391	28.1672	169.391	28.1672	21.6718	28.1672	94.191	28.1672	86.9519
28.1839	-5.60883	28.1839	166.334	28.1839	166.334	28.1839	166.334	28.1839	166.334	28.1839	166.334	28.1839	166.334	28.1839	166.334	28.1839	21.7155	28.1839	95.8986	28.1839	78.6379
28.2006	0.641177	28.2006	167.72	28.2006	167.72	28.2006	167.72	28.2006	167.72	28.2006	167.72	28.2006	167.72	28.2006	167.72	28.2006	21.3588	28.2006	97.0692	28.2006	92.8973
28.2172	4.39118	28.2172	174.43	28.2172	174.43	28.2172	174.43	28.2172	174.43	28.2172	174.43	28.2172	174.43	28.2172	174.43	28.2172	18.3821	28.2172	84.3655	28.2172	89.9262
28.2339	9.39119	28.2339	172.499	28.2339	172.499	28.2339	172.499	28.2339	172.499	28.2339	172.499	28.2339	172.499	28.2339	172.499	28.2339	27.9065	28.2339	97.7558	28.2339	87.1257
28.2506	6.8912	28.2506	176.324	28.2506	176.324	28.2506	176.324	28.2506	176.324	28.2506	176.324	28.2506	176.324	28.2506	176.324	28.2506	33.7675	28.2506	105.846	28.2506	85.4324
28.2672	-0.608794	28.2672	164.604	28.2672	164.604	28.2672	164.604	28.2672	164.604	28.2672	164.604	28.2672	164.604	28.2672	164.604	28.2672	20.2175	28.2672	100.824	28.2672	77.5012
28.2839	8.14121	28.2839	10.1521	28.2839	10.1521	28.2839	10.1521	28.2839	10.1521	28.2839	10.1521	28.2839	10.1521	28.2839	10.1521	28.2839	24.9502	28.2839	103.696	28.2839	86.7899
28.3006	-3.10878	28.3006	-0.181816	28.3006	-0.181816	28.3006	-0.181816	28.3006	-0.181816	28.3006	-0.181816	28.3006	-0.181816	28.3006	-0.181816	28.3006	29.6086	28.3006	102.571	28.3006	77.5367
28.3172	1.89123	28.3172	10.0161	28.3172	10.0161	28.3172	10.0161	28.3172	10.0161	28.3172	10.0161	28.3172	10.0161	28.3172	10.0161	28.3172	31.6782	28.3172	109.021	28.3172	81.3844
28.3339	-0.608765	28.3339	7.56083	28.3339	7.56083	28.3339	7.56083	28.3339	7.56083	28.3339	7.56083	28.3339	7.56083	28.3339	7.56083	28.3339	30.3153	28.3339	94.5992	28.3339	88.6508
28.3506	-1.85876	28.3506	0.559892	28.3506	0.559892	28.3506	0.559892	28.3506	0.559892	28.3506	0.559892	28.3506	0.559892	28.3506	0.559892	28.3506	26.6833	28.3506	94.6363	28.3506	72.1061
28.3672	-0.608751	28.3672	4.73759	28.3672	4.73759	28.3672	4.73759	28.3672	4.73759	28.3672	4.73759	28.3672	4.73759	28.3672	4.73759	28.3672	23.7585	28.3672	108.988	28.3672	92.9142
28.3839	-3.10874	28.3839	4.67305	28.3839	4.67305	28.3839	4.67305	28.3839	4.67305	28.3839	4.67305	28.3839	4.67305	28.3839	4.67305	28.3839	37.1775	28.3839	105.331	28.3839	83.8568
28.4006	4.39126	28.4006	3.99341	28.4006	3.99341	28.4006	3.99341	28.4006	3.99341	28.4006	3.99341	28.4006	3.99341	28.4006	3.99341	28.4006	39.2033	28.4006	104.146	28.4006	85.4252
28.4172	11.8913	28.4172	-3.26099	28.4172	-3.26099	28.4172	-3.26099	28.4172	-3.26099	28.4172	-3.26099	28.4172	-3.26099	28.4172	-3.26099	28.4172	31.6266	28.4172	104.355	28.4172	87.9245
28.4339	4.39128	28.4339	1.68003	28.4339	1.68003	28.4339	1.68003	28.4339	1.68003	28.4339	1.68003	28.4339	1.68003	28.4339	1.68003	28.4339	30.46	28.4339	110.673	28.4339	83.6765
28.4506	-4.35872	28.4506	7.34963	28.4506	7.34963	28.4506	7.34963	28.4506	7.34963	28.4506	7.34963	28.4506	7.34963	28.4506	7.34963	28.4506	44.1452	28.4506	100.251	28.4506	91.2802
28.4672	-1.85871	28.4672	10.6841	28.4672	10.6841	28.4672	10.6841	28.4672	10.6841	28.4672	10.6841	28.4672	10.6841	28.4672	10.6841	28.4672	34.8378	28.4672	109.981	28.4672	83.7422
28.4839	3.1413	28.4839	5.36213	28.4839	5.36213	28.4839	5.36213	28.4839	5.36213	28.4839	5.36213	28.4839	5.36213	28.4839	5.36213	28.4839	47.2931	28.4839	113.441	28.4839	83.7717
28.5006	-6.85869	28.5006	11.033	28.5006	11.033	28.5006	11.033	28.5006	11.033	28.5006	11.033	28.5006	11.033	28.5006	11.033	28.5006	42.6471	28.5006	115.483	28.5006	92.2799
28.5172	4.39131	28.5172	2.91543	28.5172	2.91543	28.5172	2.91543	28.5172	2.91543	28.5172	2.91543	28.5172	2.91543	28.5172	2.91543	28.5172	41.5637	28.5172	109.951	28.5172	87.1199
28.5339	0.641321	28.5339	9.10793	28.5339	9.10793	28.5339	9.10793	28.5339	9.10793	28.5339	9.10793	28.5339	9.10793	28.5339	9.10793	28.5339	39.8827	28.5339	118.046	28.5339	80.2398
28.5506	0.641328	28.5506	5.68298	28.5506	5.68298	28.5506	5.68298	28.5506	5.68298	28.5506	5.68298	28.5506	5.68298	28.5506	5.68298	28.5506	46.5952	28.5506	114.789	28.5506	84.267
28.5672	0.641335	28.5672	14.6747	28.5672	14.6747	28.5672	14.6747	28.5672	14.6747	28.5672	14.6747	28.5672	14.6747	28.5672	14.6747	28.5672	56.0032	28.5672	120.278	28.5672	76.7345
28.5839	1.89134	28.5839	15.4066	28.5839	15.4066	28.5839	15.4066	28.5839	15.4066	28.5839	15.4066	28.5839	15.4066	28.5839	15.4066	28.5839	38.885	28.5839	116.987	28.5839	80.5168
28.6006	9.39135	28.6006	8.11428	28.6006	8.11428	28.6006	8.11428	28.6006	8.11428	28.6006	8.11428	28.6006	8.11428	28.6006	8.11428	28.6006	50.5361	28.6006	123.688	28.6006	86.7021
28.6172	6.89136	28.6172	10.1495	28.6172	10.1495	28.6172	10.1495	28.6172	10.1495	28.6172	10.1495	28.6172	10.1495	28.6172	10.1495	28.6172	56.5333	28.6172	115.395	28.6172	79.2743
28.6339	9.39136	28.6339	8.01839	28.6339	8.01839	28.6339	8.01839	28.6339	8.01839	28.6339	8.01839	28.6339	8.01839	28.6339	8.01839	28.6339	55.0664	28.6339	132.843	28.6339	83.503
28.6506	9.39137	28.6506	7.04617	28.6506	7.04617	28.6506	7.04617	28.6506	7.04617	28.6506	7.04617	28.6506	7.04617	28.6506	7.04617	28.6506	58.0021	28.6506	130.755	28.6506	84.8579
28.6672	3.14138	28.6672	12.5126	28.6672	12.5126	28.6672	12.5126	28.6672	12.5126	28.6672	12.5126	28.6672	12.5126	28.6672	12.5126	28.6672	58.8943	28.6672	124.895	28.6672	91.7131
28.6839	9.39139	28.6839	11.3452	28.6839	11.3452	28.6839	11.3452	28.6839	11.3452	28.6839	11.3452	28.6839	11.3452	28.6839	11.3452	28.6839	47.346	28.6839	112.234	28.6839	80.7947
28.7006	0.641392	28.7006	11.4401	28.7006	11.4401	28.7006	11.4401	28.7006	11.4401	28.7006	11.4401	28.7006	11.4401	28.7006	11.4401	28.7006	60.7349	28.7006	118.382	28.7006	82.339
28.7172	21.8914	28.7172	5.72758	28.7172	5.72758	28.7172	5.72758	28.7172	5.72758	28.7172	5.72758	28.7172	5.72758	28.7172	5.72758	28.7172	51.8569	28.7172	131.533	28.7172	84.4175
28.7339	14.3914	28.7339	5.41192	28.7339	5.41192	28.7339	5.41192	28.7339	5.41192	28.7339	5.41192	28.7339	5.41192	28.7339	5.41192	28.7339	56.3296	28.7339	132.277	28.7339	87.7316
28.7506	9.39141	28.7506	15.1594	28.7506	15.1594	28.7506	15.1594	28.7506	15.1594	28.7506	15.1594	28.7506	15.1594	28.7506	15.1594	28.7506	54.5177	28.7506	137.872	28.7506	84.3482
28.7672	18.1414	28.7672	13.9737	28.7672	13.9737	28.7672	13.9737	28.7672	13.9737	28.7672	13.9737	28.7672	13.9737	28.7672	13.9737	28.7672	58.0341	28.7672	129.796	28.7672	78.3417
28.7839	16.8914	28.7839	12.547	28.7839	12.547	28.7839	12.547	28.7839	12.547	28.7839	12.547	28.7839	12.547	28.7839	12.547	28.7839	64.6261	28.7839	126.505	28.7839	78.1549
28.8006	16.8914	28.8006	23.7049	28.8006	23.7049	28.8006	23.7049	28.8006	23.7049	28.8006	23.7049	28.8006	23.7049	28.8006	23.7049	28.8006	61.2078	28.8006	137.304	28.8006	89.5059
28.8172	11.8914	28.8172	23.7466	28.8172	23.7466	28.8172	23.7466	28.8172	23.7466	28.8172	23.7466	28.8172	23.7466	28.8172	23.7466	28.8172	60.0425	28.8172	127.879	28.8172	87.0347
28.8339	19.3914	28.8339	17.0322	28.8339	17.0322	28.8339	17.0322	28.8339	17.0322	28.8339	17.0322	28.8339	17.0322	28.8339	17.0322	28.8339	75.0062	28.8339	130.59	28.8339	81.0409
28.8506	29.3915	28.8506	20.2915	28.8506	20.2915	28.8506	20.2915	28.8506	20.2915	28.8506	20.2915	28.8506	20.2915	28.8506	20.2915	28.8506	69.2846	28.8506	123.418	28.8506	93.4745
28.8672	15.6415	28.8672	15.7433	28.8672	15.7433	28.8672	15.7433	28.8672	15.7433	28.8672	15.7433	28.8672	15.7433	28.8672	15.7433	28.8672	74.3301	28.8672	136.236	28.8672	86.1034
28.8839	16.8915	28.8839	18.3745	28.8839	18.3745	28.8839	18.3745	28.8839	18.3745	28.8839	18.3745	28.8839	18.3745	28.8839	18.3745	28.8839	67.5113	28.8839	129.811	28.8839	81.1518
28.9006	15.6415	28.9006	30.4296	28.9006	30.4296	28.9006	30.4296	28.9006	30.4296	28.9006	30.4296	28.9006	30.4296	28.9006	30.4296	28.9006	70.7611	28.9006	138.919	28.9006	87.7286
28.9172	19.3915	28.9172	23.0852	28.9172	23.0852	28.9172	23.0852	28.9172	23.0852	28.9172	23.0852	28.9172	23.0852	28.9172	23.0852	28.9172	72.652	28.9172	132.211	28.9172	83.8387
28.9339	11.8915	28.9339	29.1405	28.9339	29.1405	28.9339	29.1405	28.9339	29.1405	28.9339	29.1405	28.9339	29.1405	28.9339	29.1405	28.9339	72.0117	28.9339	127.309	28.9339	86.823
28.9506	23.1415	28.9506	29.6661	28.9506	29.6661	28.9506	29.6661	28.9506	29.6661	28.9506	29.6661	28.9506	29.6661	28.9506	29.6661	28.9506	72.4792	28.9506	133.244	28.9506	83.3782
28.9672	21.8915	28.9672	22.9947	28.9672	22.9947	28.9672	22.9947	28.9672	22.9947	28.9672	22.9947	28.9672	22.9947	28.9672	22.9947	28.9672	72.7381	28.9672	137.947	28.9672	85.9972
28.9839	21.8915	28.9839	17.9248	28.9839	17.9248	28.9839	17.9248	28.9839	17.9248	28.9839	17.9248	28.9839	17.9248	28.9839	17.9248	28.9839	67.9705	28.9839	136.074	28.9839	85.5748
29.0006	15.6415	29.0006	27.9704	29.0006	27.9704	29.0006	27.9704	29.0006	27.9704	29.0006	27.9704	29.0006	27.9704	29.0006	27.9704	29.0006	74.5582	29.0006	144.862	29.0006	87.737
29.0172	30.6415	29.0172	24.9617	29.0172	24.9617	29.0172	24.9617	29.0172	24.9617	29.0172	24.9617	29.0172	24.9617	29.0172	24.9617	29.0172	63.4958	29.0172	134.807	29.0172	85.6103
29.0339	21.8915	29.0339	28.4193	29.0339	28.4193	29.0339	28.4193	29.0339	28.4193	29.0339	28.4193	29.0339	28.4193	29.0339	28.4193	29.0339	69.4433	29.0339	138.024	29.0339	86.6805
29.0506	23.1415	29.0506	23.1445	29.0506	23.1445	29.0506	23.1445	29.0506	23.1445	29.0506	23.1445	29.0506	23.1445	29.0506	23.1445	29.0506	68.2262	29.0506	145.493	29.0506	85.9273
29.0672	34.3915	29.0672	23.911	29.0672	23.911	29.0672	23.911	29.0672	23.911	29.0672	23.911	29.0672	23.911	29.0672	23.911	29.0672	73.9315	29.0672	144.463	29.0672	81.1035
29.0839	25.6416	29.0839	48.5669	29.0839	48.5669	29.0839	48.5669	29.0839	48.5669	29.0839	48.5669	29.0839	48.5669	29.0839	48.5669	29.0839	69.6803	29.0839	144.952	29.0839	83.1043
29.1006	24.3916	29.1006	30.058	29.1006	30.058	29.1006	30.058	29.1006	30.058	29.1006	30.058	29.1006	30.058	29.1006	30.058	29.1006	73.6472	29.1006	148.881	29.1006	88.9739
29.1172	33.1416	29.1172	25.1786	29.1172	25.1786	29.1172	25.1786	29.1172	25.1786	29.1172	25.1786	29.1172	25.1786	29.1172	25.1786	29.1172	79.5441	29.1172	159.229	29.1172	79.6077
29.1339	30.6416	29.1339	22.8155	29.1339	22.8155	29.1339	22.8155	29.1339	22.8155	29.1339	22.8155	29.1339	22.8155	29.1339	22.8155	29.1339	64.5577	29.1339	157.289	29.1339	86.0442
29.1506	43.1416	29.1506	32.3179	29.1506	32.3179	29.1506	32.3179	29.1506	32.3179	29.1506	32.3179	29.1506	32.3179	29.1506	32.3179	29.1506	69.4941	29.1506	155.825	29.1506	91.3402
29.1673	34.3916	29.1673	36.9411	29.1673	36.9411	29.1673	36.9411	29.1673	36.9411	29.1673	36.9411	29.1673	36.9411	29.1673	36.9411	29.1673	57.8324	29.1673	157.811	29.1673	77.2347
29.1839	21.8916	29.1839	34.2614	29.1839	34.2614	29.1839	34.2614	29.1839	34.2614	29.1839	34.2614	29.1839	34.2614	29.1839	34.2614	29.1839	71.4425	29.1839	165.87	29.1839	83.2963
29.2006	26.8916	29.2006	28.6968	29.2006	28.6968	29.2006	28.6968	29.2006	28.6968	29.2006	28.6968	29.2006	28.6968	29.2006	28.6968	29.2006	72.1284	29.2006	159.368	29.2006	71.1026
29.2173	28.1416	29.2173	43.2415	29.2173	43.2415	29.2173	43.2415	29.2173	43.2415	29.2173	43.2415	29.2173	43.2415	29.2173	43.2415	29.2173	69.8931	29.2173	159.517	29.2173	80.944
29.2339	19.3916	29.2339	41.7329	29.2339	41.7329	29.2339	41.7329	29.2339	41.7329	29.2339	41.7329	29.2339	41.7329	29.2339	41.7329	29.2339	74.5847	29.2339	153.286	29.2339	80.7442
29.2506	36.8916	29.2506	39.1078	29.2506	39.1078	29.2506	39.1078	29.2506	39.1078	29.2506	39.1078	29.2506	39.1078	29.2506	39.1078	29.2506	71.1883	29.2506	163.721	29.2506	81.7881
29.2673	36.8916	29.2673	40.9361	29.2673	40.9361	29.2673	40.9361	29.2673	40.9361	29.2673	40.9361	29.2673	40.9361	29.2673	40.9361	29.2673	73.9981	29.2673	167.568	29.2673	83.0337
29.2839	41.8916	29.2839	38.3265	29.2839	38.3265	29.2839	38.3265	29.2839	38.3265	29.2839	38.3265	29.2839	38.3265	29.2839	38.3265	29.2839	71.1492	29.2839	174.33	29.2839	81.3529
29.3006	40.6417	29.3006	36.1929	29.3006	36.1929	29.3006	36.1929	29.3006	36.1929	29.3006	36.1929	29.3006	36.1929	29.3006	36.1929	29.3006	78.717	29.3006	171.45	29.3006	87.8897
29.3173	43.1417	29.3173	41.5021	29.3173	41.5021	29.3173	41.5021	29.3173	41.5021	29.3173	41.5021	29.3173	41.5021	29.3173	41.5021	29.3173	76.2207	29.3173	168.104	29.3173	78.4884
29.3339	36.8917	29.3339	33.5617	29.3339	33.5617	29.3339	33.5617	29.3339	33.5617	29.3339	33.5617	29.3339	33.5617	29.3339	33.5617	29.3339	84.4725	29.3339	167.324	29.3339	78.1664
29.3506	40.6417	29.3506	39.4484	29.3506	39.4484	29.3506	39.4484	29.3506	39.4484	29.3506	39.4484	29.3506	39.4484	29.3506	39.4484	29.3506	75.5623	29.3506	163.223	29.3506	88.7019
29.3673	41.8917	29.3673	33.0499	29.3673	33.0499	29.3673	33.0499	29.3673	33.0499	29.3673	33.0499	29.3673	33.0499	29.3673	33.0499	29.3673	74.8776	29.3673	167.74	29.3673	86.1179
29.3839	39.3917	29.3839	41.132	29.3839	41.132	29.3839	41.132	29.3839	41.132	29.3839	41.132	29.3839	41.132	29.3839	41.132	29.3839	81.2119	29.3839	166.893	29.3839	81.0723
29.4006	36.8917	29.4006	42.1292	29.4006	42.1292	29.4006	42.1292	29.4006	42.1292	29.4006	42.1292	29.4006	42.1292	29.4006	42.1292	29.4006	75.9553	29.4006	175.342	29.4006	91.0798
29.4173	41.8917	29.4173	44.4259	29.4173	44.4259	29.4173	44.4259	29.4173	44.4259	29.4173	44.4259	29.4173	44.4259	29.4173	44.4259	29.4173	77.3919	29.4173	7.68937	29.4173	80.5044
29.4339	45.6417	29.4339	45.544	29.4339	45.544	29.4339	45.544	29.4339	45.544	29.4339	45.544	29.4339	45.544	29.4339	45.544	29.4339	76.1928	29.4339	9.35151	29.4339	80.0032
29.4506	43.1417	29.4506	42.9404	29.4506	42.9404	29.4506	42.9404	29.4506	42.9404	29.4506	42.9404	29.4506	42.9404	29.4506	42.9404	29.4506	82.1345	29.4506	12.6743	29.4506	91.7275
29.4673	44.3917	29.4673	36.7893	29.4673	36.7893	29.4673	36.7893	29.4673	36.7893	29.4673	36.7893	29.4673	36.7893	29.4673	36.7893	29.4673	85.1769	29.4673	14.7806	29.4673	85.0368
29.4839	40.6417	29.4839	51.2663	29.4839	51.2663	29.4839	51.2663	29.4839	51.2663	29.4839	51.2663	29.4839	51.2663	29.4839	51.2663	29.4839	86.8695	29.4839	1.82365	29.4839	82.5872
29.5006	39.3917	29.5006	41.7527	29.5006	41.7527	29.5006	41.7527	29.5006	41.7527	29.5006	41.7527	29.5006	41.7527	29.5006	41.7527	29.5006	78.3892	29.5006	9.07566	29.5006	83.8896
29.5173	45.6417	29.5173	51.6002	29.5173	51.6002	29.5173	51.6002	29.5173	51.6002	29.5173	51.6002	29.5173	51.6002	29.5173	51.6002	29.5173	86.757	29.5173	9.54841	29.5173	88.9588
29.5339	51.8918	29.5339	46.7379	29.5339	46.7379	29.5339	46.7379	29.5339	46.7379	29.5339	46.7379	29.5339	46.7379	29.5339	46.7379	29.5339	81.3193	29.5339	14.5081	29.5339	101.051
29.5506	54.3918	29.5506	41.0321	29.5506	41.0321	29.5506	41.0321	29.5506	41.0321	29.5506	41.0321	29.5506	41.0321	29.5506	41.0321	29.5506	89.1948	29.5506	10.9262	29.5506	102.679
29.5673	54.3918	29.5673	49.4482	29.5673	49.4482	29.5673	49.4482	29.5673	49.4482	29.5673	49.4482	29.5673	49.4482	29.5673	49.4482	29.5673	88.3521	29.5673	5.08846	29.5673	104.28
29.5839	43.1418	29.5839	53.6354	29.5839	53.6354	29.5839	53.6354	29.5839	53.6354	29.5839	53.6354	29.5839	53.6354	29.5839	53.6354	29.5839	75.7535	29.5839	7.51886	29.5839	93.7397
29.6006	48.1418	29.6006	59.7117	29.6006	59.7117	29.6006	59.7117	29.6006	59.7117	29.6006	59.7117	29.6006	59.7117	29.6006	59.7117	29.6006	84.2088	29.6006	15.6374	29.6006	96.0772
29.6173	48.1418	29.6173	43.8531	29.6173	43.8531	29.6173	43.8531	29.6173	43.8531	29.6173	43.8531	29.6173	43.8531	29.6173	43.8531	29.6173	83.7516	29.6173	20.4801	29.6173	96.53
29.6339	48.1418	29.6339	55.8397	29.6339	55.8397	29.6339	55.8397	29.6339	55.8397	29.6339	55.8397	29.6339	55.8397	29.6339	55.8397	29.6339	91.9717	29.6339	13.3358	29.6339	112.963
29.6506	40.6418	29.6506	54.1405	29.6506	54.1405	29.6506	54.1405	29.6506	54.1405	29.6506	54.1405	29.6506	54.1405	29.6506	54.1405	29.6506	87.3938	29.6506	12.7893	29.6506	95.4191
29.6673	55.6418	29.6673	48.4221	29.6673	48.4221	29.6673	48.4221	29.6673	48.4221	29.6673	48.4221	29.6673	48.4221	29.6673	48.4221	29.6673	92.722	29.6673	17.3776	29.6673	105.569
29.6839	45.6418	29.6839	62.0271	29.6839	62.0271	29.6839	62.0271	29.6839	62.0271	29.6839	62.0271	29.6839	62.0271	29.6839	62.0271	29.6839	91.2336	29.6839	6.79922	29.6839	100.527
29.7006	59.3918	29.7006	50.5411	29.7006	50.5411	29.7006	50.5411	29.7006	50.5411	29.7006	50.5411	29.7006	50.5411	29.7006	50.5411	29.7006	92.1947	29.7006	6.91531	29.7006	102.066
29.7173	63.1418	29.7173	52.913	29.7173	52.913	29.7173	52.913	29.7173	52.913	29.7173	52.913	29.7173	52.913	29.7173	52.913	29.7173	86.8704	29.7173	13.6118	29.7173	94.7512
29.7339	54.3918	29.7339	63.9349	29.7339	63.9349	29.7339	63.9349	29.7339	63.9349	29.7339	63.9349	29.7339	63.9349	29.7339	63.9349	29.7339	89.2294	29.7339	20.6319	29.7339	105.66
29.7506	51.8918	29.7506	72.0775	29.7506	72.0775	29.7506	72.0775	29.7506	72.0775	29.7506	72.0775	29.7506	72.0775	29.7506	72.0775	29.7506	99.3774	29.7506	20.1325	29.7506	112.118
29.7673	59.3918	29.7673	63.0015	29.7673	63.0015	29.7673	63.0015	29.7673	63.0015	29.7673	63.0015	29.7673	63.0015	29.7673	63.0015	29.7673	91.0441	29.7673	12.2361	29.7673	101.72
29.7839	69.3919	29.7839	66.605	29.7839	66.605	29.7839	66.605	29.7839	66.605	29.7839	66.605	29.7839	66.605	29.7839	66.605	29.7839	86.3497	29.7839	16.79	29.7839	110.247
29.8006	65.6419	29.8006	77.0168	29.8006	77.0168	29.8006	77.0168	29.8006	77.0168	29.8006	77.0168	29.8006	77.0168	29.8006	77.0168	29.8006	91.7035	29.8006	26.9549	29.8006	117.441
29.8173	69.3919	29.8173	61.0909	29.8173	61.0909	29.8173	61.0909	29.8173	61.0909	29.8173	61.0909	29.8173	61.0909	29.8173	61.0909	29.8173	99.2617	29.8173	21.0706	29.8173	116.593
29.8339	64.3919	29.8339	65.2133	29.8339	65.2133	29.8339	65.2133	29.8339	65.2133	29.8339	65.2133	29.8339	65.2133	29.8339	65.2133	29.8339	96.8653	29.8339	26.9045	29.8339	119.128
29.8506	69.3919	29.8506	71.0782	29.8506	71.0782	29.8506	71.0782	29.8506	71.0782	29.8506	71.0782	29.8506	71.0782	29.8506	71.0782	29.8506	104.864	29.8506	25.4923	29.8506	117.055
29.8673	70.6419	29.8673	63.7442	29.8673	63.7442	29.8673	63.7442	29.8673	63.7442	29.8673	63.7442	29.8673	63.7442	29.8673	63.7442	29.8673	100.775	29.8673	27.3225	29.8673	126.352
29.8839	69.3919	29.8839	69.4793	29.8839	69.4793	29.8839	69.4793	29.8839	69.4793	29.8839	69.4793	29.8839	69.4793	29.8839	69.4793	29.8839	108.082	29.8839	26.3362	29.8839	125.728
29.9006	86.8919	29.9006	72.0937	29.9006	72.0937	29.9006	72.0937	29.9006	72.0937	29.9006	72.0937	29.9006	72.0937	29.9006	72.0937	29.9006	105.394	29.9006	28.7754	29.9006	127.753
29.9173	73.1419	29.9173	68.4623	29.9173	68.4623	29.9173	68.4623	29.9173	68.4623	29.9173	68.4623	29.9173	68.4623	29.9173	68.4623	29.9173	103.219	29.9173	28.6622	29.9173	120.404
29.9339	81.8919	29.9339	85.156	29.9339	85.156	29.9339	85.156	29.9339	85.156	29.9339	85.156	29.9339	85.156	29.9339	85.156	29.9339	104.972	29.9339	28.079	29.9339	133.333
29.9506	76.8919	29.9506	69.4257	29.9506	69.4257	29.9506	69.4257	29.9506	69.4257	29.9506	69.4257	29.9506	69.4257	29.9506	69.4257	29.9506	101.568	29.9506	26.176	29.9506	125.309
29.9673	76.8919	29.9673	64.653	29.9673	64.653	29.9673	64.653	29.9673	64.653	29.9673	64.653	29.9673	64.653	29.9673	64.653	29.9673	105.756	29.9673	29.3932	29.9673	135.962
29.9839	83.1419	29.9839	76.747	29.9839	76.747	29.9839	76.747	29.9839	76.747	29.9839	76.747	29.9839	76.747	29.9839	76.747	29.9839	99.0633	29.9839	23.9534	29.9839	136.461
30.0006	74.392	30.0006	68.6128	30.0006	68.6128	30.0006	68.6128	30.0006	68.6128	30.0006	68.6128	30.0006	68.6128	30.0006	68.6128	30.0006	114.523	30.0006	41.6523	30.0006	138.177
30.0173	78.142	30.0173	76.4881	30.0173	76.4881	30.0173	76.4881	30.0173	76.4881	30.0173	76.4881	30.0173	76.4881	30.0173	76.4881	30.0173	108.687	30.0173	47.0097	30.0173	143.034
30.0339	61.892	30.0339	68.9168	30.0339	68.9168	30.0339	68.9168	30.0339	68.9168	30.0339	68.9168	30.0339	68.9168	30.0339	68.9168	30.0339	102.05	30.0339	43.8411	30.0339	150.155
30.0506	61.892	30.0506	74.417	30.0506	74.417	30.0506	74.417	30.0506	74.417	30.0506	74.417	30.0506	74.417	30.0506	74.417	30.0506	104.956	30.0506	28.7102	30.0506	143.945
30.0673	69.392	30.0673	75.273	30.0673	75.273	30.0673	75.273	30.0673	75.273	30.0673	75.273	30.0673	75.273	30.0673	75.273	30.0673	112.896	30.0673	33.6365	30.0673	148.439
30.0839	70.642	30.0839	82.4386	30.0839	82.4386	30.0839	82.4386	30.0839	82.4386	30.0839	82.4386	30.0839	82.4386	30.0839	82.4386	30.0839	107.431	30.0839	43.0011	30.0839	153.798
30.1006	78.142	30.1006	76.8411	30.1006	76.8411	30.1006	76.8411	30.1006	76.8411	30.1006	76.8411	30.1006	76.8411	30.1006	76.8411	30.1006	112.568	30.1006	43.2407	30.1006	150.813
30.1173	79.392	30.1173	71.6443	30.1173	71.6443	30.1173	71.6443	30.1173	71.6443	30.1173	71.6443	30.1173	71.6443	30.1173	71.6443	30.1173	110.02	30.1173	57.2021	30.1173	152.86
30.1339	81.892	30.1339	81.011	30.1339	81.011	30.1339	81.011	30.1339	81.011	30.1339	81.011	30.1339	81.011	30.1339	81.011	30.1339	114.564	30.1339	48.4836	30.1339	152.936
30.1506	90.642	30.1506	86.0991	30.1506	86.0991	30.1506	86.0991	30.1506	86.0991	30.1506	86.0991	30.1506	86.0991	30.1506	86.0991	30.1506	118.425	30.1506	48.1811	30.1506	144.62
30.1673	86.892	30.1673	80.1373	30.1673	80.1373	30.1673	80.1373	30.1673	80.1373	30.1673	80.1373	30.1673	80.1373	30.1673	80.1373	30.1673	116.836	30.1673	56.973	30.1673	156.263
30.1839	73.142	30.1839	70.3986	30.1839	70.3986	30.1839	70.3986	30.1839	70.3986	30.1839	70.3986	30.1839	70.3986	30.1839	70.3986	30.1839	114.481	30.1839	41.1395	30.1839	161.999
30.2006	73.142	30.2006	82.8403	30.2006	82.8403	30.2006	82.8403	30.2006	82.8403	30.2006	82.8403	30.2006	82.8403	30.2006	82.8403	30.2006	118.269	30.2006	47.5738	30.2006	154.741
30.2173	83.142	30.2173	73.8043	30.2173	73.8043	30.2173	73.8043	30.2173	73.8043	30.2173	73.8043	30.2173	73.8043	30.2173	73.8043	30.2173	124.645	30.2173	57.0131	30.2173	157.796
30.2339	93.1421	30.2339	87.6476	30.2339	87.6476	30.2339	87.6476	30.2339	87.6476	30.2339	87.6476	30.2339	87.6476	30.2339	87.6476	30.2339	122.14	30.2339	51.908	30.2339	156.874
30.2506	78.1421	30.2506	80.4206	30.2506	80.4206	30.2506	80.4206	30.2506	80.4206	30.2506	80.4206	30.2506	80.4206	30.2506	80.4206	30.2506	130.499	30.2506	49.6001	30.2506	162.219
30.2673	86.8921	30.2673	91.4821	30.2673	91.4821	30.2673	91.4821	30.2673	91.4821	30.2673	91.4821	30.2673	91.4821	30.2673	91.4821	30.2673	118.177	30.2673	56.9089	30.2673	153.043
30.2839	81.8921	30.2839	86.3626	30.2839	86.3626	30.2839	86.3626	30.2839	86.3626	30.2839	86.3626	30.2839	86.3626	30.2839	86.3626	30.2839	131.099	30.2839	60.4481	30.2839	157.61
30.3006	78.1421	30.3006	85.4576	30.3006	85.4576	30.3006	85.4576	30.3006	85.4576	30.3006	85.4576	30.3006	85.4576	30.3006	85.4576	30.3006	123.864	30.3006	53.7452	30.3006	156.24
30.3173	79.3921	30.3173	87.1618	30.3173	87.1618	30.3173	87.1618	30.3173	87.1618	30.3173	87.1618	30.3173	87.1618	30.3173	87.1618	30.3173	126.471	30.3173	50.4001	30.3173	163.955
30.3339	89.3921	30.3339	88.0263	30.3339	88.0263	30.3339	88.0263	30.3339	88.0263	30.3339	88.0263	30.3339	88.0263	30.3339	88.0263	30.3339	127.165	30.3339	55.3296	30.3339	163.622
30.3506	99.3921	30.3506	95.1001	30.3506	95.1001	30.3506	95.1001	30.3506	95.1001	30.3506	95.1001	30.3506	95.1001	30.3506	95.1001	30.3506	125.576	30.3506	63.1017	30.3506	162.917
30.3673	88.1421	30.3673	80.1419	30.3673	80.1419	30.3673	80.1419	30.3673	80.1419	30.3673	80.1419	30.3673	80.1419	30.3673	80.1419	30.3673	128.657	30.3673	65.566	30.3673	158.931
30.3839	89.3921	30.3839	94.5629	30.3839	94.5629	30.3839	94.5629	30.3839	94.5629	30.3839	94.5629	30.3839	94.5629	30.3839	94.5629	30.3839	129.39	30.3839	55.995	30.3839	156.002
30.4006	83.1421	30.4006	85.0354	30.4006	85.0354	30.4006	85.0354	30.4006	85.0354	30.4006	85.0354	30.4006	85.0354	30.4006	85.0354	30.4006	117.727	30.4006	62.6479	30.4006	165.95
30.4173	90.6421	30.4173	86.8785	30.4173	86.8785	30.4173	86.8785	30.4173	86.8785	30.4173	86.8785	30.4173	86.8785	30.4173	86.8785	30.4173	122.662	30.4173	66.3639	30.4173	164.841
30.4339	94.3921	30.4339	82.678	30.4339	82.678	30.4339	82.678	30.4339	82.678	30.4339	82.678	30.4339	82.678	30.4339	82.678	30.4339	139.846	30.4339	65.3451	30.4339	162
30.4506	94.3921	30.4506	84.9976	30.4506	84.9976	30.4506	84.9976	30.4506	84.9976	30.4506	84.9976	30.4506	84.9976	30.4506	84.9976	30.4506	127.474	30.4506	57.8575	30.4506	171.248
30.4673	100.642	30.4673	92.5533	30.4673	92.5533	30.4673	92.5533	30.4673	92.5533	30.4673	92.5533	30.4673	92.5533	30.4673	92.5533	30.4673	139.941	30.4673	67.7806	30.4673	165.054
30.4839	94.3922	30.4839	93.0667	30.4839	93.0667	30.4839	93.0667	30.4839	93.0667	30.4839	93.0667	30.4839	93.0667	30.4839	93.0667	30.4839	130.177	30.4839	69.7504	30.4839	166.886
30.5006	93.1422	30.5006	92.3979	30.5006	92.3979	30.5006	92.3979	30.5006	92.3979	30.5006	92.3979	30.5006	92.3979	30.5006	92.3979	30.5006	144.252	30.5006	59.4535	30.5006	167.864
30.5173	85.6422	30.5173	83.636	30.5173	83.636	30.5173	83.636	30.5173	83.636	30.5173	83.636	30.5173	83.636	30.5173	83.636	30.5173	153.23	30.5173	72.0913	30.5173	164.353
30.5339	94.3922	30.5339	87.8697	30.5339	87.8697	30.5339	87.8697	30.5339	87.8697	30.5339	87.8697	30.5339	87.8697	30.5339	87.8697	30.5339	133.019	30.5339	69.7815	30.5339	2.7208
30.5506	83.1422	30.5506	96.3338	30.5506	96.3338	30.5506	96.3338	30.5506	96.3338	30.5506	96.3338	30.5506	96.3338	30.5506	96.3338	30.5506	144.51	30.5506	69.2026	30.5506	17.2112
30.5673	90.6422	30.5673	85.8078	30.5673	85.8078	30.5673	85.8078	30.5673	85.8078	30.5673	85.8078	30.5673	85.8078	30.5673	85.8078	30.5673	142.247	30.5673	73.2418	30.5673	17.8822
30.5839	98.1422	30.5839	94.9552	30.5839	94.9552	30.5839	94.9552	30.5839	94.9552	30.5839	94.9552	30.5839	94.9552	30.5839	94.9552	30.5839	141.828	30.5839	81.2917	30.5839	12.6138
30.6006	99.3922	30.6006	100.896	30.6006	100.896	30.6006	100.896	30.6006	100.896	30.6006	100.896	30.6006	100.896	30.6006	100.896	30.6006	144.086	30.6006	75.6047	30.6006	16.6118
30.6173	90.6422	30.6173	85.1793	30.6173	85.1793	30.6173	85.1793	30.6173	85.1793	30.6173	85.1793	30.6173	85.1793	30.6173	85.1793	30.6173	145.608	30.6173	76.3291	30.6173	9.17192
30.6339	101.892	30.6339	98.0119	30.6339	98.0119	30.6339	98.0119	30.6339	98.0119	30.6339	98.0119	30.6339	98.0119	30.6339	98.0119	30.6339	162.037	30.6339	74.6521	30.6339	11.2071
30.6506	100.642	30.6506	107.188	30.6506	107.188	30.6506	107.188	30.6506	107.188	30.6506	107.188	30.6506	107.188	30.6506	107.188	30.6506	162.178	30.6506	82.3471	30.6506	12.9798
30.6673	110.642	30.6673	95.1047	30.6673	95.1047	30.6673	95.1047	30.6673	95.1047	30.6673	95.1047	30.6673	95.1047	30.6673	95.1047	30.6673	155.527	30.6673	79.8987	30.6673	13.8269
30.6839	108.142	30.6839	98.8785	30.6839	98.8785	30.6839	98.8785	30.6839	98.8785	30.6839	98.8785	30.6839	98.8785	30.6839	98.8785	30.6839	162.589	30.6839	76.4579	30.6839	11.4315
30.7006	94.3923	30.7006	97.9031	30.7006	97.9031	30.7006	97.9031	30.7006	97.9031	30.7006	97.9031	30.7006	97.9031	30.7006	97.9031	30.7006	164.806	30.7006	80.1429	30.7006	16.4631
30.7173	91.8923	30.7173	102.28	30.7173	102.28	30.7173	102.28	30.7173	102.28	30.7173	102.28	30.7173	102.28	30.7173	102.28	30.7173	165.323	30.7173	71.8211	30.7173	23.1543
30.7339	78.1423	30.7339	107.085	30.7339	107.085	30.7339	107.085	30.7339	107.085	30.7339	107.085	30.7339	107.085	30.7339	107.085	30.7339	164.932	30.7339	79.9487	30.7339	26.3134
30.7506	94.3923	30.7506	99.5824	30.7506	99.5824	30.7506	99.5824	30.7506	99.5824	30.7506	99.5824	30.7506	99.5824	30.7506	99.5824	30.7506	169.702	30.7506	81.4862	30.7506	19.3703
30.7673	105.642	30.7673	103.146	30.7673	103.146	30.7673	103.146	30.7673	103.146	30.7673	103.146	30.7673	103.146	30.7673	103.146	30.7673	170.405	30.7673	78.6932	30.7673	6.12244
30.7839	111.892	30.7839	103.713	30.7839	103.713	30.7839	103.713	30.7839	103.713	30.7839	103.713	30.7839	103.713	30.7839	103.713	30.7839	166.825	30.7839	75.8627	30.7839	23.8622
30.8006	108.142	30.8006	95.1195	30.8006	95.1195	30.8006	95.1195	30.8006	95.1195	30.8006	95.1195	30.8006	95.1195	30.8006	95.1195	30.8006	173.584	30.8006	68.8335	30.8006	16.9665
30.8173	113.142	30.8173	107.462	30.8173	107.462	30.8173	107.462	30.8173	107.462	30.8173	107.462	30.8173	107.462	30.8173	107.462	30.8173	161.049	30.8173	81.4642	30.8173	18.6398
30.834	113.142	30.834	106.966	30.834	106.966	30.834	106.966	30.834	106.966	30.834	106.966	30.834	106.966	30.834	106.966	30.834	168.017	30.834	80.4251	30.834	12.2195
30.8506	108.142	30.8506	117.858	30.8506	117.858	30.8506	117.858	30.8506	117.858	30.8506	117.858	30.8506	117.858	30.8506	117.858	30.8506	165.672	30.8506	87.487	30.8506	18.2032
30.8673	116.892	30.8673	100.059	30.8673	100.059	30.8673	100.059	30.8673	100.059	30.8673	100.059	30.8673	100.059	30.8673	100.059	30.8673	163.02	30.8673	79.8902	30.8673	27.762
30.884	110.642	30.884	104.34	30.884	104.34	30.884	104.34	30.884	104.34	30.884	104.34	30.884	104.34	30.884	104.34	30.884	165.937	30.884	79.1037	30.884	18.1072
30.9006	113.142	30.9006	107.528	30.9006	107.528	30.9006	107.528	30.9006	107.528	30.9006	107.528	30.9006	107.528	30.9006	107.528	30.9006	171.023	30.9006	83.8792	30.9006	20.2511
30.9173	125.642	30.9173	105.022	30.9173	105.022	30.9173	105.022	30.9173	105.022	30.9173	105.022	30.9173	105.022	30.9173	105.022	30.9173	169.545	30.9173	85.8402	30.9173	24.3851
30.934	114.392	30.934	104.674	30.934	104.674	30.934	104.674	30.934	104.674	30.934	104.674	30.934	104.674	30.934	104.674	30.934	171.192	30.934	80.8302	30.934	22.499
30.9506	104.392	30.9506	113.53	30.9506	113.53	30.9506	113.53	30.9506	113.53	30.9506	113.53	30.9506	113.53	30.9506	113.53	30.9506	180.98	30.9506	91.2869	30.9506	18.7582
30.9673	123.142	30.9673	116.81	30.9673	116.81	30.9673	116.81	30.9673	116.81	30.9673	116.81	30.9673	116.81	30.9673	116.81	30.9673	173.006	30.9673	88.7261	30.9673	15.5137
30.984	129.392	30.984	114.535	30.984	114.535	30.984	114.535	30.984	114.535	30.984	114.535	30.984	114.535	30.984	114.535	30.984	-5.2096	30.984	90.6737	30.984	19.3241
31.0006	121.892	31.0006	121.381	31.0006	121.381	31.0006	121.381	31.0006	121.381	31.0006	121.381	31.0006	121.381	31.0006	121.381	31.0006	9.45551	31.0006	84.9605	31.0006	19.2368
31.0173	126.892	31.0173	129.352	31.0173	129.352	31.0173	129.352	31.0173	129.352	31.0173	129.352	31.0173	129.352	31.0173	129.352	31.0173	9.11063	31.0173	91.8996	31.0173	15.9899
31.034	106.892	31.034	119.078	31.034	119.078	31.034	119.078	31.034	119.078	31.034	119.078	31.034	119.078	31.034	119.078	31.034	14.1276	31.034	93.1786	31.034	17.8536
31.0506	124.392	31.0506	118.876	31.0506	118.876	31.0506	118.876	31.0506	118.876	31.0506	118.876	31.0506	118.876	31.0506	118.876	31.0506	0.436314	31.0506	85.9651	31.0506	16.7221
31.0673	138.142	31.0673	125.626	31.0673	125.626	31.0673	125.626	31.0673	125.626	31.0673	125.626	31.0673	125.626	31.0673	125.626	31.0673	8.98315	31.0673	83.4372	31.0673	23.5642
31.084	135.642	31.084	124.677	31.084	124.677	31.084	124.677	31.084	124.677	31.084	124.677	31.084	124.677	31.084	124.677	31.084	9.74048	31.084	90.7119	31.084	18.9343
31.1006	144.392	31.1006	122.727	31.1006	122.727	31.1006	122.727	31.1006	122.727	31.1006	122.727	31.1006	122.727	31.1006	122.727	31.1006	15.3832	31.1006	85.4853	31.1006	10.4272
31.1173	141.892	31.1173	119.571	31.1173	119.571	31.1173	119.571	31.1173	119.571	31.1173	119.571	31.1173	119.571	31.1173	119.571	31.1173	3.2688	31.1173	90.5604	31.1173	19.5397
31.134	145.642	31.134	123.978	31.134	123.978	31.134	123.978	31.134	123.978	31.134	123.978	31.134	123.978	31.134	123.978	31.134	5.45749	31.134	86.7282	31.134	20.749
31.1506	131.892	31.1506	131.273	31.1506	131.273	31.1506	131.273	31.1506	131.273	31.1506	131.273	31.1506	131.273	31.1506	131.273	31.1506	5.18712	31.1506	94.0464	31.1506	16.3
31.1673	136.892	31.1673	123.716	31.1673	123.716	31.1673	123.716	31.1673	123.716	31.1673	123.716	31.1673	123.716	31.1673	123.716	31.1673	16.4088	31.1673	99.406	31.1673	24.2981
31.184	143.142	31.184	123.139	31.184	123.139	31.184	123.139	31.184	123.139	31.184	123.139	31.184	123.139	31.184	123.139	31.184	11.8776	31.184	82.7541	31.184	17.6948
31.2006	150.642	31.2006	123.348	31.2006	123.348	31.2006	123.348	31.2006	123.348	31.2006	123.348	31.2006	123.348	31.2006	123.348	31.2006	6.09456	31.2006	89.9067	31.2006	23.3247
31.2173	141.892	31.2173	127.3	31.2173	127.3	31.2173	127.3	31.2173	127.3	31.2173	127.3	31.2173	127.3	31.2173	127.3	31.2173	14.6397	31.2173	93.6061	31.2173	15.8662
31.234	143.142	31.234	127.261	31.234	127.261	31.234	127.261	31.234	127.261	31.234	127.261	31.234	127.261	31.234	127.261	31.234	20.516	31.234	96.161	31.234	19.4613
31.2506	149.392	31.2506	125.875	31.2506	125.875	31.2506	125.875	31.2506	125.875	31.2506	125.875	31.2506	125.875	31.2506	125.875	31.2506	16.8833	31.2506	95.6042	31.2506	18.5493
31.2673	140.643	31.2673	126.517	31.2673	126.517	31.2673	126.517	31.2673	126.517	31.2673	126.517	31.2673	126.517	31.2673	126.517	31.2673	12.158	31.2673	93.2187	31.2673	23.772
31.284	153.143	31.284	122.153	31.284	122.153	31.284	122.153	31.284	122.153	31.284	122.153	31.284	122.153	31.284	122.153	31.284	21.0757	31.284	96.926	31.284	18.6817
31.3006	149.393	31.3006	126.931	31.3006	126.931	31.3006	126.931	31.3006	126.931	31.3006	126.931	31.3006	126.931	31.3006	126.931	31.3006	18.0878	31.3006	99.0033	31.3006	23.3977
31.3173	146.893	31.3173	125.469	31.3173	125.469	31.3173	125.469	31.3173	125.469	31.3173	125.469	31.3173	125.469	31.3173	125.469	31.3173	16.4284	31.3173	92.4374	31.3173	23.9491
31.334	153.143	31.334	125.554	31.334	125.554	31.334	125.554	31.334	125.554	31.334	125.554	31.334	125.554	31.334	125.554	31.334	20.7818	31.334	90.0605	31.334	22.4009
31.3506	164.393	31.3506	119.004	31.3506	119.004	31.3506	119.004	31.3506	119.004	31.3506	119.004	31.3506	119.004	31.3506	119.004	31.3506	2.79009	31.3506	95.8828	31.3506	21.5301
31.3673	154.393	31.3673	129.792	31.3673	129.792	31.3673	129.792	31.3673	129.792	31.3673	129.792	31.3673	129.792	31.3673	129.792	31.3673	20.4258	31.3673	86.9091	31.3673	30.8004
31.384	169.393	31.384	131.152	31.384	131.152	31.384	131.152	31.384	131.152	31.384	131.152	31.384	131.152	31.384	131.152	31.384	22.3999	31.384	83.8228	31.384	20.8195
31.4006	159.393	31.4006	134.873	31.4006	134.873	31.4006	134.873	31.4006	134.873	31.4006	134.873	31.4006	134.873	31.4006	134.873	31.4006	15.7572	31.4006	104.923	31.4006	34.1733
31.4173	165.643	31.4173	138.2	31.4173	138.2	31.4173	138.2	31.4173	138.2	31.4173	138.2	31.4173	138.2	31.4173	138.2	31.4173	29.97	31.4173	98.1557	31.4173	27.5015
31.434	150.643	31.434	133.43	31.434	133.43	31.434	133.43	31.434	133.43	31.434	133.43	31.434	133.43	31.434	133.43	31.434	22.6891	31.434	94.4154	31.434	31.3471
31.4506	166.893	31.4506	137.683	31.4506	137.683	31.4506	137.683	31.4506	137.683	31.4506	137.683	31.4506	137.683	31.4506	137.683	31.4506	17.0897	31.4506	98.1491	31.4506	37.3419
31.4673	165.643	31.4673	142.787	31.4673	142.787	31.4673	142.787	31.4673	142.787	31.4673	142.787	31.4673	142.787	31.4673	142.787	31.4673	15.718	31.4673	101.894	31.4673	27.4962
31.484	155.643	31.484	126.429	31.484	126.429	31.484	126.429	31.484	126.429	31.484	126.429	31.484	126.429	31.484	126.429	31.484	22.3829	31.484	94.4978	31.484	40.5
31.5006	145.643	31.5006	129.377	31.5006	129.377	31.5006	129.377	31.5006	129.377	31.5006	129.377	31.5006	129.377	31.5006	129.377	31.5006	27.4237	31.5006	96.6609	31.5006	39.9035
31.5173	160.643	31.5173	132.326	31.5173	132.326	31.5173	132.326	31.5173	132.326	31.5173	132.326	31.5173	132.326	31.5173	132.326	31.5173	29.5989	31.5173	100.372	31.5173	40.3535
31.534	155.643	31.534	139.425	31.534	139.425	31.534	139.425	31.534	139.425	31.534	139.425	31.534	139.425	31.534	139.425	31.534	33.6304	31.534	102.006	31.534	36.676
31.5506	153.143	31.5506	135.893	31.5506	135.893	31.5506	135.893	31.5506	135.893	31.5506	135.893	31.5506	135.893	31.5506	135.893	31.5506	26.4823	31.5506	107.364	31.5506	47.0257
31.5673	166.893	31.5673	141.25	31.5673	141.25	31.5673	141.25	31.5673	141.25	31.5673	141.25	31.5673	141.25	31.5673	141.25	31.5673	22.556	31.5673	112.765	31.5673	48.4702
31.584	153.143	31.584	141.437	31.584	141.437	31.584	141.437	31.584	141.437	31.584	141.437	31.584	141.437	31.584	141.437	31.584	33.3693	31.584	113.328	31.584	41.6627
31.6006	158.143	31.6006	144.471	31.6006	144.471	31.6006	144.471	31.6006	144.471	31.6006	144.471	31.6006	144.471	31.6006	144.471	31.6006	26.5547	31.6006	119.984	31.6006	40.6395
31.6173	156.893	31.6173	134.59	31.6173	134.59	31.6173	134.59	31.6173	134.59	31.6173	134.59	31.6173	134.59	31.6173	134.59	31.6173	31.2334	31.6173	122.174	31.6173	39.8126
31.634	165.643	31.634	143.868	31.634	143.868	31.634	143.868	31.634	143.868	31.634	143.868	31.634	143.868	31.634	143.868	31.634	21.3666	31.634	121.771	31.634	46.1871
31.6506	158.143	31.6506	145.892	31.6506	145.892	31.6506	145.892	31.6506	145.892	31.6506	145.892	31.6506	145.892	31.6506	145.892	31.6506	26.5516	31.6506	127.79	31.6506	44.0307
31.6673	163.143	31.6673	146.332	31.6673	146.332	31.6673	146.332	31.6673	146.332	31.6673	146.332	31.6673	146.332	31.6673	146.332	31.6673	27.6662	31.6673	133.094	31.6673	46.7126
31.684	154.393	31.684	146.662	31.684	146.662	31.684	146.662	31.684	146.662	31.684	146.662	31.684	146.662	31.684	146.662	31.684	43.0633	31.684	124.174	31.684	44.8034
31.7006	171.893	31.7006	152.561	31.7006	152.561	31.7006	152.561	31.7006	152.561	31.7006	152.561	31.7006	152.561	31.7006	152.561	31.7006	26.0688	31.7006	125.29	31.7006	45.7274
31.7173	153.143	31.7173	145.493	31.7173	145.493	31.7173	145.493	31.7173	145.493	31.7173	145.493	31.7173	145.493	31.7173	145.493	31.7173	38.2695	31.7173	127.054	31.7173	49.1876
31.734	150.643	31.734	141.832	31.734	141.832	31.734	141.832	31.734	141.832	31.734	141.832	31.734	141.832	31.734	141.832	31.734	38.1204	31.734	114.81	31.734	50.6551
31.7506	153.143	31.7506	157.327	31.7506	157.327	31.7506	157.327	31.7506	157.327	31.7506	157.327	31.7506	157.327	31.7506	157.327	31.7506	36.8054	31.7506	125.577	31.7506	58.2713
31.7673	150.643	31.7673	144.615	31.7673	144.615	31.7673	144.615	31.7673	144.615	31.7673	144.615	31.7673	144.615	31.7673	144.615	31.7673	35.1338	31.7673	123.882	31.7673	50.2047
31.784	149.393	31.784	158.986	31.784	158.986	31.784	158.986	31.784	158.986	31.784	158.986	31.784	158.986	31.784	158.986	31.784	50.0492	31.784	128.894	31.784	47.6115
31.8006	-6.83047	31.8006	146.718	31.8006	146.718	31.8006	146.718	31.8006	146.718	31.8006	146.718	31.8006	146.718	31.8006	146.718	31.8006	45.9837	31.8006	125.594	31.8006	50.776
31.8173	-1.83046	31.8173	149.146	31.8173	149.146	31.8173	149.146	31.8173	149.146	31.8173	149.146	31.8173	149.146	31.8173	149.146	31.8173	45.0775	31.8173	124.026	31.8173	53.9589
31.834	-0.580451	31.834	158.915	31.834	158.915	31.834	158.915	31.834	158.915	31.834	158.915	31.834	158.915	31.834	158.915	31.834	50.7942	31.834	126.868	31.834	61.1516
31.8506	8.16956	31.8506	158.544	31.8506	158.544	31.8506	158.544	31.8506	158.544	31.8506	158.544	31.8506	158.544	31.8506	158.544	31.8506	51.3884	31.8506	134.531	31.8506	51.25
31.8673	6.91956	31.8673	158.228	31.8673	158.228	31.8673	158.228	31.8673	158.228	31.8673	158.228	31.8673	158.228	31.8673	158.228	31.8673	45.5057	31.8673	129.283	31.8673	56.8973
31.884	13.1696	31.884	156.056	31.884	156.056	31.884	156.056	31.884	156.056	31.884	156.056	31.884	156.056	31.884	156.056	31.884	49.5781	31.884	128.725	31.884	57.1408
31.9006	-0.580423	31.9006	157.377	31.9006	157.377	31.9006	157.377	31.9006	157.377	31.9006	157.377	31.9006	157.377	31.9006	157.377	31.9006	44.3882	31.9006	132.218	31.9006	69.0913
31.9173	0.669584	31.9173	159.274	31.9173	159.274	31.9173	159.274	31.9173	159.274	31.9173	159.274	31.9173	159.274	31.9173	159.274	31.9173	55.6284	31.9173	133.474	31.9173	64.6926
31.934	10.6696	31.934	159.159	31.934	159.159	31.934	159.159	31.934	159.159	31.934	159.159	31.934	159.159	31.934	159.159	31.934	57.2828	31.934	129.963	31.934	65.5354
31.9506	3.1696	31.9506	163.54	31.9506	163.54	31.9506	163.54	31.9506	163.54	31.9506	163.54	31.9506	163.54	31.9506	163.54	31.9506	60.1053	31.9506	121.659	31.9506	77.4995
31.9673	-1.83039	31.9673	155.967	31.9673	155.967	31.9673	155.967	31.9673	155.967	31.9673	155.967	31.9673	155.967	31.9673	155.967	31.9673	62.2546	31.9673	132.127	31.9673	73.8114
31.984	-5.58039	31.984	159.218	31.984	159.218	31.984	159.218	31.984	159.218	31.984	159.218	31.984	159.218	31.984	159.218	31.984	60.4465	31.984	139.84	31.984	66.8793
32.0006	-4.33038	32.0006	150.673	32.0006	150.673	32.0006	150.673	32.0006	150.673	32.0006	150.673	32.0006	150.673	32.0006	150.673	32.0006	57.0411	32.0006	134.862	32.0006	77.9818
32.0173	0.669627	32.0173	160.287	32.0173	160.287	32.0173	160.287	32.0173	160.287	32.0173	160.287	32.0173	160.287	32.0173	160.287	32.0173	51.3692	32.0173	131.817	32.0173	74.3427
32.034	-4.33037	32.034	164.624	32.034	164.624	32.034	164.624	32.034	164.624	32.034	164.624	32.034	164.624	32.034	164.624	32.034	58.623	32.034	131.774	32.034	74.9966
32.0506	-0.580358	32.0506	162.636	32.0506	162.636	32.0506	162.636	32.0506	162.636	32.0506	162.636	32.0506	162.636	32.0506	162.636	32.0506	57.3974	32.0506	136.828	32.0506	86.5237
32.0673	-6.83035	32.0673	168.67	32.0673	168.67	32.0673	168.67	32.0673	168.67	32.0673	168.67	32.0673	168.67	32.0673	168.67	32.0673	56.0748	32.0673	134.929	32.0673	71.8268
32.084	6.91966	32.084	172.214	32.084	172.214	32.084	172.214	32.084	172.214	32.084	172.214	32.084	172.214	32.084	172.214	32.084	61.127	32.084	135.292	32.084	81.1821
32.1006	-6.83034	32.1006	171.489	32.1006	171.489	32.1006	171.489	32.1006	171.489	32.1006	171.489	32.1006	171.489	32.1006	171.489	32.1006	68.3518	32.1006	131.892	32.1006	87.0574
32.1173	0.66967	32.1173	164.648	32.1173	164.648	32.1173	164.648	32.1173	164.648	32.1173	164.648	32.1173	164.648	32.1173	164.648	32.1173	56.2795	32.1173	131.324	32.1173	78.9555
32.134	-0.580322	32.134	166.502	32.134	166.502	32.134	166.502	32.134	166.502	32.134	166.502	32.134	166.502	32.134	166.502	32.134	58.5982	32.134	151.623	32.134	82.7585
32.1506	1.91968	32.1506	164.514	32.1506	164.514	32.1506	164.514	32.1506	164.514	32.1506	164.514	32.1506	164.514	32.1506	164.514	32.1506	68.253	32.1506	138.478	32.1506	93.4832
32.1673	6.91969	32.1673	173.26	32.1673	173.26	32.1673	173.26	32.1673	173.26	32.1673	173.26	32.1673	173.26	32.1673	173.26	32.1673	68.0925	32.1673	155.177	32.1673	77.1893
32.184	-3.0803	32.184	7.88027	32.184	7.88027	32.184	7.88027	32.184	7.88027	32.184	7.88027	32.184	7.88027	32.184	7.88027	32.184	68.947	32.184	143.582	32.184	83.8869
32.2006	8.16971	32.2006	0.59332	32.2006	0.59332	32.2006	0.59332	32.2006	0.59332	32.2006	0.59332	32.2006	0.59332	32.2006	0.59332	32.2006	79.3018	32.2006	144.342	32.2006	78.9607
32.2173	16.9197	32.2173	0.6267	32.2173	0.6267	32.2173	0.6267	32.2173	0.6267	32.2173	0.6267	32.2173	0.6267	32.2173	0.6267	32.2173	75.1316	32.2173	149.764	32.2173	92.7099
32.234	8.16972	32.234	-2.25831	32.234	-2.25831	32.234	-2.25831	32.234	-2.25831	32.234	-2.25831	32.234	-2.25831	32.234	-2.25831	32.234	73.6577	32.234	150.331	32.234	86.8379
32.2506	11.9197	32.2506	7.68169	32.2506	7.68169	32.2506	7.68169	32.2506	7.68169	32.2506	7.68169	32.2506	7.68169	32.2506	7.68169	32.2506	74.9531	32.2506	144.796	32.2506	83.6354
32.2673	8.16973	32.2673	-0.785026	32.2673	-0.785026	32.2673	-0.785026	32.2673	-0.785026	32.2673	-0.785026	32.2673	-0.785026	32.2673	-0.785026	32.2673	81.8038	32.2673	154.2	32.2673	84.3005
32.284	14.4197	32.284	6.10584	32.284	6.10584	32.284	6.10584	32.284	6.10584	32.284	6.10584	32.284	6.10584	32.284	6.10584	32.284	90.7546	32.284	148.774	32.284	82.1582
32.3006	20.6697	32.3006	12.8974	32.3006	12.8974	32.3006	12.8974	32.3006	12.8974	32.3006	12.8974	32.3006	12.8974	32.3006	12.8974	32.3006	73.4902	32.3006	150.313	32.3006	94.2879
32.3173	23.1698	32.3173	-1.49081	32.3173	-1.49081	32.3173	-1.49081	32.3173	-1.49081	32.3173	-1.49081	32.3173	-1.49081	32.3173	-1.49081	32.3173	81.6695	32.3173	157.534	32.3173	84.9047
32.334	25.6698	32.334	-0.028277	32.334	-0.028277	32.334	-0.028277	32.334	-0.028277	32.334	-0.028277	32.334	-0.028277	32.334	-0.028277	32.334	83.8088	32.334	159.766	32.334	79.1382
32.3506	21.9198	32.3506	10.7407	32.3506	10.7407	32.3506	10.7407	32.3506	10.7407	32.3506	10.7407	32.3506	10.7407	32.3506	10.7407	32.3506	75.5506	32.3506	158.146	32.3506	87.6079
32.3673	25.6698	32.3673	6.62485	32.3673	6.62485	32.3673	6.62485	32.3673	6.62485	32.3673	6.62485	32.3673	6.62485	32.3673	6.62485	32.3673	73.0879	32.3673	159.792	32.3673	82.9926
32.384	26.9198	32.384	14.3795	32.384	14.3795	32.384	14.3795	32.384	14.3795	32.384	14.3795	32.384	14.3795	32.384	14.3795	32.384	79.269	32.384	168.469	32.384	84.0453
32.4006	21.9198	32.4006	13.5005	32.4006	13.5005	32.4006	13.5005	32.4006	13.5005	32.4006	13.5005	32.4006	13.5005	32.4006	13.5005	32.4006	85.2477	32.4006	156.679	32.4006	83.1111
32.4173	20.6698	32.4173	6.96693	32.4173	6.96693	32.4173	6.96693	32.4173	6.96693	32.4173	6.96693	32.4173	6.96693	32.4173	6.96693	32.4173	77.5559	32.4173	155.424	32.4173	85.7834
32.434	21.9198	32.434	10.9323	32.434	10.9323	32.434	10.9323	32.434	10.9323	32.434	10.9323	32.434	10.9323	32.434	10.9323	32.434	84.1021	32.434	154.866	32.434	76.1835
32.4506	28.1698	32.4506	18.668	32.4506	18.668	32.4506	18.668	32.4506	18.668	32.4506	18.668	32.4506	18.668	32.4506	18.668	32.4506	83.4068	32.4506	171.534	32.4506	81.1424
32.4673	31.9198	32.4673	8.236	32.4673	8.236	32.4673	8.236	32.4673	8.236	32.4673	8.236	32.4673	8.236	32.4673	8.236	32.4673	84.0427	32.4673	160.319	32.4673	84.93
32.484	28.1698	32.484	11.9561	32.484	11.9561	32.484	11.9561	32.484	11.9561	32.484	11.9561	32.484	11.9561	32.484	11.9561	32.484	91.0482	32.484	158.108	32.484	80.4807
32.5007	21.9198	32.5007	7.98336	32.5007	7.98336	32.5007	7.98336	32.5007	7.98336	32.5007	7.98336	32.5007	7.98336	32.5007	7.98336	32.5007	86.4535	32.5007	169.674	32.5007	88.0082
32.5173	20.6698	32.5173	5.6314	32.5173	5.6314	32.5173	5.6314	32.5173	5.6314	32.5173	5.6314	32.5173	5.6314	32.5173	5.6314	32.5173	94.6786	32.5173	164.277	32.5173	90.0898
32.534	33.1698	32.534	16.4432	32.534	16.4432	32.534	16.4432	32.534	16.4432	32.534	16.4432	32.534	16.4432	32.534	16.4432	32.534	99.7817	32.534	161.139	32.534	83.0536
32.5507	26.9199	32.5507	16.2701	32.5507	16.2701	32.5507	16.2701	32.5507	16.2701	32.5507	16.2701	32.5507	16.2701	32.5507	16.2701	32.5507	94.1152	32.5507	169.419	32.5507	90.1801
32.5673	33.1699	32.5673	10.939	32.5673	10.939	32.5673	10.939	32.5673	10.939	32.5673	10.939	32.5673	10.939	32.5673	10.939	32.5673	91.8501	32.5673	167.011	32.5673	81.4217
32.584	31.9199	32.584	18.5708	32.584	18.5708	32.584	18.5708	32.584	18.5708	32.584	18.5708	32.584	18.5708	32.584	18.5708	32.584	96.4188	32.584	160.776	32.584	84.2616
32.6007	28.1699	32.6007	16.5764	32.6007	16.5764	32.6007	16.5764	32.6007	16.5764	32.6007	16.5764	32.6007	16.5764	32.6007	16.5764	32.6007	87.792	32.6007	155.542	32.6007	83.5268
32.6173	35.6699	32.6173	15.7867	32.6173	15.7867	32.6173	15.7867	32.6173	15.7867	32.6173	15.7867	32.6173	15.7867	32.6173	15.7867	32.6173	102.307	32.6173	160.256	32.6173	83.0457
32.634	38.1699	32.634	15.3149	32.634	15.3149	32.634	15.3149	32.634	15.3149	32.634	15.3149	32.634	15.3149	32.634	15.3149	32.634	94.8485	32.634	166	32.634	76.1997
32.6507	41.9199	32.6507	19.5498	32.6507	19.5498	32.6507	19.5498	32.6507	19.5498	32.6507	19.5498	32.6507	19.5498	32.6507	19.5498	32.6507	92.9983	32.6507	167.391	32.6507	83.1172
32.6673	36.9199	32.6673	23.4084	32.6673	23.4084	32.6673	23.4084	32.6673	23.4084	32.6673	23.4084	32.6673	23.4084	32.6673	23.4084	32.6673	92.7026	32.6673	170.567	32.6673	86.3566
32.684	30.6699	32.684	26.9558	32.684	26.9558	32.684	26.9558	32.684	26.9558	32.684	26.9558	32.684	26.9558	32.684	26.9558	32.684	104.922	32.684	168.778	32.684	87.4009
32.7007	28.1699	32.7007	20.4873	32.7007	20.4873	32.7007	20.4873	32.7007	20.4873	32.7007	20.4873	32.7007	20.4873	32.7007	20.4873	32.7007	96.8451	32.7007	164.473	32.7007	85.1946
32.7173	31.9199	32.7173	20.2516	32.7173	20.2516	32.7173	20.2516	32.7173	20.2516	32.7173	20.2516	32.7173	20.2516	32.7173	20.2516	32.7173	97.4853	32.7173	168.659	32.7173	85.9604
32.734	34.4199	32.734	16.8896	32.734	16.8896	32.734	16.8896	32.734	16.8896	32.734	16.8896	32.734	16.8896	32.734	16.8896	32.734	101.582	32.734	163.576	32.734	95.0615
32.7507	35.6699	32.7507	31.4479	32.7507	31.4479	32.7507	31.4479	32.7507	31.4479	32.7507	31.4479	32.7507	31.4479	32.7507	31.4479	32.7507	96.9926	32.7507	165.607	32.7507	82.1993
32.7673	34.4199	32.7673	28.3002	32.7673	28.3002	32.7673	28.3002	32.7673	28.3002	32.7673	28.3002	32.7673	28.3002	32.7673	28.3002	32.7673	97.3962	32.7673	165.34	32.7673	80.921
32.784	30.67	32.784	30.9414	32.784	30.9414	32.784	30.9414	32.784	30.9414	32.784	30.9414	32.784	30.9414	32.784	30.9414	32.784	104.978	32.784	8.33082	32.784	99.502
32.8007	31.92	32.8007	19.3888	32.8007	19.3888	32.8007	19.3888	32.8007	19.3888	32.8007	19.3888	32.8007	19.3888	32.8007	19.3888	32.8007	102.18	32.8007	-2.23123	32.8007	78.0108
32.8173	45.67	32.8173	30.9875	32.8173	30.9875	32.8173	30.9875	32.8173	30.9875	32.8173	30.9875	32.8173	30.9875	32.8173	30.9875	32.8173	102.978	32.8173	2.81989	32.8173	85.74
32.834	41.92	32.834	21.5054	32.834	21.5054	32.834	21.5054	32.834	21.5054	32.834	21.5054	32.834	21.5054	32.834	21.5054	32.834	114.096	32.834	0.0714087	32.834	76.5046
32.8507	41.92	32.8507	27.4955	32.8507	27.4955	32.8507	27.4955	32.8507	27.4955	32.8507	27.4955	32.8507	27.4955	32.8507	27.4955	32.8507	108.789	32.8507	-0.582073	32.8507	78.9659
32.8673	51.92	32.8673	26.4254	32.8673	26.4254	32.8673	26.4254	32.8673	26.4254	32.8673	26.4254	32.8673	26.4254	32.8673	26.4254	32.8673	117.049	32.8673	17.0988	32.8673	83.6646
32.884	49.42	32.884	28.9995	32.884	28.9995	32.884	28.9995	32.884	28.9995	32.884	28.9995	32.884	28.9995	32.884	28.9995	32.884	105.364	32.884	1.27322	32.884	88.1248
32.9007	48.17	32.9007	36.5819	32.9007	36.5819	32.9007	36.5819	32.9007	36.5819	32.9007	36.5819	32.9007	36.5819	32.9007	36.5819	32.9007	118.739	32.9007	3.67463	32.9007	79.7844
32.9173	51.92	32.9173	27.4816	32.9173	27.4816	32.9173	27.4816	32.9173	27.4816	32.9173	27.4816	32.9173	27.4816	32.9173	27.4816	32.9173	116.783	32.9173	-3.84544	32.9173	82.5743
32.934	63.17	32.934	35.5356	32.934	35.5356	32.934	35.5356	32.934	35.5356	32.934	35.5356	32.934	35.5356	32.934	35.5356	32.934	120.124	32.934	7.32227	32.934	81.2364
32.9507	56.92	32.9507	31.6845	32.9507	31.6845	32.9507	31.6845	32.9507	31.6845	32.9507	31.6845	32.9507	31.6845	32.9507	31.6845	32.9507	109.76	32.9507	15.3211	32.9507	75.0692
32.9673	44.42	32.9673	39.7482	32.9673	39.7482	32.9673	39.7482	32.9673	39.7482	32.9673	39.7482	32.9673	39.7482	32.9673	39.7482	32.9673	115.334	32.9673	21.1886	32.9673	81.6766
32.984	50.67	32.984	38.8852	32.984	38.8852	32.984	38.8852	32.984	38.8852	32.984	38.8852	32.984	38.8852	32.984	38.8852	32.984	121.738	32.984	24.8567	32.984	86.8413
33.0007	46.9201	33.0007	34.7388	33.0007	34.7388	33.0007	34.7388	33.0007	34.7388	33.0007	34.7388	33.0007	34.7388	33.0007	34.7388	33.0007	121.427	33.0007	11.9845	33.0007	91.6253
33.0173	49.4201	33.0173	35.38	33.0173	35.38	33.0173	35.38	33.0173	35.38	33.0173	35.38	33.0173	35.38	33.0173	35.38	33.0173	112.071	33.0173	17.232	33.0173	92.02
33.034	48.1701	33.034	37.9678	33.034	37.9678	33.034	37.9678	33.034	37.9678	33.034	37.9678	33.034	37.9678	33.034	37.9678	33.034	122.233	33.034	25.3521	33.034	82.166
33.0507	51.9201	33.0507	42.3689	33.0507	42.3689	33.0507	42.3689	33.0507	42.3689	33.0507	42.3689	33.0507	42.3689	33.0507	42.3689	33.0507	117.232	33.0507	25.5418	33.0507	92.0393
33.0673	59.4201	33.0673	40.9499	33.0673	40.9499	33.0673	40.9499	33.0673	40.9499	33.0673	40.9499	33.0673	40.9499	33.0673	40.9499	33.0673	128.407	33.0673	22.7375	33.0673	88.234
33.084	53.1701	33.084	35.3977	33.084	35.3977	33.084	35.3977	33.084	35.3977	33.084	35.3977	33.084	35.3977	33.084	35.3977	33.084	119.841	33.084	21.3677	33.084	82.4943
33.1007	61.9201	33.1007	36.2369	33.1007	36.2369	33.1007	36.2369	33.1007	36.2369	33.1007	36.2369	33.1007	36.2369	33.1007	36.2369	33.1007	125.616	33.1007	19.1365	33.1007	84.7501
33.1173	58.1701	33.1173	31.8619	33.1173	31.8619	33.1173	31.8619	33.1173	31.8619	33.1173	31.8619	33.1173	31.8619	33.1173	31.8619	33.1173	128.601	33.1173	15.9554	33.1173	83.9603
33.134	63.1701	33.134	40.9852	33.134	40.9852	33.134	40.9852	33.134	40.9852	33.134	40.9852	33.134	40.9852	33.134	40.9852	33.134	122.114	33.134	20.0071	33.134	87.7122
33.1507	60.6701	33.1507	34.7292	33.1507	34.7292	33.1507	34.7292	33.1507	34.7292	33.1507	34.7292	33.1507	34.7292	33.1507	34.7292	33.1507	130.186	33.1507	16.7797	33.1507	98.5594
33.1673	54.4201	33.1673	40.3767	33.1673	40.3767	33.1673	40.3767	33.1673	40.3767	33.1673	40.3767	33.1673	40.3767	33.1673	40.3767	33.1673	125.408	33.1673	29.3519	33.1673	88.487
33.184	59.4201	33.184	46.773	33.184	46.773	33.184	46.773	33.184	46.773	33.184	46.773	33.184	46.773	33.184	46.773	33.184	129.747	33.184	19.3893	33.184	86.6109
33.2007	68.1701	33.2007	39.4264	33.2007	39.4264	33.2007	39.4264	33.2007	39.4264	33.2007	39.4264	33.2007	39.4264	33.2007	39.4264	33.2007	123.759	33.2007	16.835	33.2007	82.7359
33.2173	69.4201	33.2173	38.8294	33.2173	38.8294	33.2173	38.8294	33.2173	38.8294	33.2173	38.8294	33.2173	38.8294	33.2173	38.8294	33.2173	135.265	33.2173	30.1665	33.2173	82.6739
33.234	56.9202	33.234	46.879	33.234	46.879	33.234	46.879	33.234	46.879	33.234	46.879	33.234	46.879	33.234	46.879	33.234	127.191	33.234	22.3745	33.234	83.9934
33.2507	64.4202	33.2507	38.6699	33.2507	38.6699	33.2507	38.6699	33.2507	38.6699	33.2507	38.6699	33.2507	38.6699	33.2507	38.6699	33.2507	133.271	33.2507	19.3528	33.2507	85.6666
33.2673	70.6702	33.2673	52.0707	33.2673	52.0707	33.2673	52.0707	33.2673	52.0707	33.2673	52.0707	33.2673	52.0707	33.2673	52.0707	33.2673	138.693	33.2673	24.2968	33.2673	86.4097
33.284	73.1702	33.284	49.1784	33.284	49.1784	33.284	49.1784	33.284	49.1784	33.284	49.1784	33.284	49.1784	33.284	49.1784	33.284	122.328	33.284	10.1834	33.284	88.1367
33.3007	95.6702	33.3007	49.5413	33.3007	49.5413	33.3007	49.5413	33.3007	49.5413	33.3007	49.5413	33.3007	49.5413	33.3007	49.5413	33.3007	129.807	33.3007	20.2116	33.3007	91.9948
[truncated: 43,682 more rows]
