# Supplementary material for: Homology sensing via non-linear amplification of sequence-dependent pausing by RecQ helicase
Source: eLife. 2019 Aug 29;8:e45909. doi: 10.7554/eLife.45909 (PMC6773442; doi:10.7554/eLife.45909)
Supplement: Figure 4—source data 1. [file elife-45909-fig4-data1.xlsx]

## Sheet: Fig4 parameters
The forked duplex substrates used had a dsDNA segment of 33 bp. However, the effective lengths are shorter, due to spontaneous unwinding of the dsDNA ends. Based on melting temperature calculations, the last 8, 9 and 11 bp will unwind spontaneously at 25°C with around 50 % probability, for the gc 79, 49 and 36 substrates, respectively.
calculated ΔG (RT units)
bp position	gc 79%	gc 49%	gc 36%
1	3.78525	3.66696	2.1968
2	2.45027	2.43337	2.163
3	2.163	1.68984	3.78525
4	3.10931	2.45027	2.163
5	3.10931	3.78525	2.45027
6	3.78525	3.66696	2.1968
7	3.66696	3.78525	1.48706
8	3.10931	2.45027	2.45027
9	2.1968	1.68984	2.1968
10	2.43337	1.48706	2.43337
11	3.66696	1.68984	2.163
12	3.10931	0.980109	0.980109
13	3.78525	1.68984	1.48706
14	3.66696	2.163	0.980109
15	2.1968	3.78525	2.43337
16	2.163	2.163	2.163
17	3.10931	2.1968	0.980109
18	2.1968	2.163	2.43337
19	2.163	0.980109	2.45027
20	3.10931	1.68984	1.48706
21	3.10931	2.163	1.68984
22	3.78525	3.78525	0.980109
23	3.66696	3.10931
24	3.78525	2.45027
25	3.66696
simultaneous melting model (Equation 1)
Rate constants calculated (k(i)) (without prefactor)
		n = 1	n=1	n = 2	n = 2	n = 3	n = 3	n = 3	n = 4	n = 4	n = 4	n = 5	n = 5	n = 5	n = 6	n = 6	n = 6	n = 7	n = 7	n = 7	7
i	gc79	gc49	gc36	gc79	gc49	gc36	gc79	gc49	gc36	gc79	gc49	gc36	gc79	gc49	gc36	gc79	gc49	gc36	gc79	gc49	gc36
1	0.0227032	0.025554	0.111159	0.00195861	0.00224212	0.012781	0.0002252	0.00041378	0.00029017	1.00511e-05	3.56968e-05	3.33637e-05	4.48596e-07	8.10433e-07	2.87829e-06	1.01846e-08	2.07098e-08	3.19947e-07	2.60257e-10	4.7018e-10	7.23194e-08
2	0.0862701	0.0877403	0.11498	0.00513174	0.015921	0.00261041	4.52245e-05	5.00504e-05	0.00110262	1.15567e-06	1.1363e-06	0.000187	2.52542e-07	2.08783e-06	2.11409e-05	1.26867e-08	5.65835e-06	8.20627e-06	2.88029e-10	5.28852e-06	3.07957e-06
3	0.11498	0.184548	0.0227032	0.00101328	0.000580159	0.00958967	0.000126779	0.000361458	0.00216761	1.11236e-05	0.00288896	0.000420831	7.35519e-08	3.33637e-05	0.000321134	3.67874e-08	7.07955e-07	2.81764e-05	1.45231e-08	2.65674e-07	1.1954e-06
4	0.0446317	0.0862701	0.11498	0.00114052	0.00195861	0.0195001	0.00010007	0.0156542	0.00378586	7.41502e-06	5.53912e-05	0.00085574	2.92734e-06	0.000101775	7.38247e-05	3.01677e-09	6.96092e-07	0.00135049	3.36585e-07	8.7416e-05	0.37527
5	0.0446317	0.0227032	0.0862701	0.0097531	0.0417146	0.0097531	6.44898e-05	0.000481747	0.00744253	2.54596e-05	0.000885156	0.000642067	1.50223e-08	1.00511e-05	0.0692555	0.025554
6	0.0227032	0.025554	0.111159	0.00114052	0.0692555	0.0431485	0.000570438	0.00146956	0.00378586	5.87865e-07	1.00511e-05	0.0692555
7	0.025554	0.0227032	0.226036	0.000580159	0.0212193	0.0848245	0.000229038	0.00796299	0.00359872	0.025554
8	0.0446317	0.0862701	0.0862701	0.012781	0.00261041	0.0100884	1.31715e-05	8.7416e-05	0.37527
9	0.111159	0.184548	0.111159	0.0049612	0.012781	0.0329263	0.025554
10	0.0877403	0.226036	0.0877403	0.00513174	0.0692555	0.0195001
11	0.025554	0.184548	0.11498	0.00101328	0.00261041	0.0692555
12	0.0446317	0.37527	0.37527	0.000580159	0.00385038
13	0.0227032	0.184548	0.226036	0.025554
14	0.025554	0.11498	0.37527
15	0.111159	0.0227032	0.0877403
16	0.11498	0.11498	0.11498
17	0.0446317	0.111159	0.37527
18	0.111159	0.11498	0.0877403
19	0.11498	0.37527	0.0862701
20	0.0446317	0.184548	0.226036
21	0.0446317	0.11498	0.184548
22	0.0227032	0.0227032	0.37527
23	0.025554	0.0446317
24	0.0227032	0.0862701
25	0.025554
delayed release model (Equation 2)
Rate constants calculated (k(i)) (without prefactor)
	n = 2	n = 2	n = 2	n = 3	n = 3	n = 3	n = 4	n = 4	n = 4	n = 5	n = 5	n = 5	n = 6	n = 6	n = 6	n = 7	n = 7	n = 7
i	gc79	gc49	gc36	gc79	gc49	gc36	gc79	gc49	gc36	gc79	gc49	gc36	gc79	gc49	gc36	gc79	gc49	gc36
1	0.0179733	0.0197902	0.0565185	0.0155436	0.0178735	0.016197	0.0115286	0.014806	0.0141971	0.009162	0.00896164	0.0121909	0.00652771	0.00663484	0.010986	0.00519951	0.00513436	0.0104768
2	0.0321515	0.0587885	0.0189596	0.0112539	0.0105518	0.0341474	0.00781308	0.0072037	0.02732	0.00793787	0.00955899	0.0220239	0.00697009	0.0135936	0.0209332	0.00533286	0.0229182	0.0198272
3	0.0150484	0.0120222	0.0485728	0.0141775	0.0163782	0.0399812	0.0122053	0.0557846	0.0314908	0.00650559	0.0150953	0.0335031	0.00756004	0.0118269	0.0242452	0.00974626	0.0114656	0.0179886
4	0.01625	0.0179733	0.0624392	0.0137107	0.0799523	0.0439383	0.00991349	0.0149567	0.0367873	0.0140446	0.0290075	0.02579	0.00553298	0.0105458	0.0414956	0.00601111	0.0128133	0.37527
5	0.0490354	0.101598	0.0490354	0.0108489	0.0171932	0.0540947	0.0159988	0.0387947	0.0332473	0.00529761	0.0115286	0.123711	0.025554
6	0.01625	0.123711	0.0880132	0.0249383	0.0378924	0.0439383	0.00668308	0.0115286	0.123711
7	0.0120222	0.0708425	0.141067	0.0186887	0.0595928	0.0466544	0.025554
8	0.0565185	0.0189596	0.049765	0.00786003	0.0128133	0.37527
9	0.0318454	0.0565185	0.0711135	0.025554
10	0.0321515	0.123711	0.0624392
11	0.0150484	0.0189596	0.123711
12	0.0120222	0.0294143
13	0.025554

## Sheet: Fig.4B
RecQ -dH	49% gc		79% gc		36% gc
Time (s)	Fraction of DNA unwound (%) (mean, n = 3 biological replicates)	SEM	Fraction of DNA unwound (%) (mean, n = 3 biological replicates)	SEM	Fraction of DNA unwound (%) (mean, n = 3 biological replicates)	SEM
0	0	0	0	0	0	0
0.08	-2.4579	1.15658	1.54267	6.67662	4.85091	6.44792
0.12	-2.64576	1.19942	1.162	4.40113	3.37061	4.30907
0.2	-1.17874	1.56239	-0.43748	6.47492	13.4756	16.6909
0.35	17.7472	2.10982	5.03976	7.91837	38.6912	13.4837
0.59	37.0199	3.77423	13.5911	13.2348	50.7821	4.83193
1	48.5631	5.25996	26.6664	1.94111	60.1828	15.1704
2.5	54.346	4.96317	33.733	0.85905	81.0363	8.79208
5	57.128	4.83899	45.0497	8.9137	80.5801	2.93328
10	69.9989	0.87791	53.7956	3.11809	84.6347	0.49131
20	76.9381	0.15539	73.8555	14.4411	86.4764	3.50179
30	83.6375	0.09825	75.665	12.2681	92.4706	3.26033
40	87.8408	1.09882	80.6583	11.3985	95.6658	1.8604
60	92.8839	0.62489	86.2204	7.8591	96.3674	1.60242
100	95.2144	1.65075	93.0539	5.776	96.8062	1.58103
RecQWT	49% gc		79% gc		36% gc
Time (s)	Fraction of DNA unwound (%) (mean, n = 3 biological replicates)	SEM	Fraction of DNA unwound (%) (mean, n = 3 biological replicates)	SEM	Fraction of DNA unwound (%) (mean, n = 3 biological replicates)	SEM
0	0	0	0	0	0	0
0.08	-0.1	0.8	-0.2	0.2	-0.2	0.3
0.12	0.2	1.7	-0.1	1.6	0.1	0.1
0.2	-0.4	1	0	1.1	-0.2	0.4
0.35	2.4	16.7	5.3	6.2	9.5	3.6
0.59	19.6	14.8	10.1	3	22.3	6.1
1	36	16.8	22.9	4.6	42.7	5.2
2.5	36.5	19.6	36.7	3.9	57.3	8.6
5	42.4	12.3	44.7	2.4	60.5	7.6
10	46.4	7.9	46.1	0.9	65	5.4
20	49.6	3.6	52.7	1.3	67.4	1.1
40	52.3	2.1	60.9	1	70.6	6.3
80	62.5	0.1	66.2	3.6	82.7	6.6
160	76.1	3.5	73.6	10.8	91.9	9.9
320	84.9	6.8	78.1	5.9	95.1	2.4

## Sheet: Fig.4CD
n-step model
	RecQ WT		RecQ-dH
n	χv2	Estimated standard deviation (√(2/N); N = 45)	χv2	Estimated standard deviation (√(2/N); N = 45)
1	1.86	0.21	1.23	0.21
2	1.55	0.21	0.85	0.21
3	1.26	0.21	0.74	0.21
4	1.14	0.21	0.69	0.21
5	1.073	0.21	0.66	0.21
6	1.089	0.21	0.73	0.21
7	1.13	0.21	0.84	0.21
simultaneous melting model
	RecQ WT		RecQ-dH
n	χv2	Estimated standard deviation (√(2/N); N = 45)	χv2	Estimated standard deviation (√(2/N); N = 45)
1	2.33	0.21	1.14	0.21
2	3.9	0.21	2.01	0.21
3	5.62	0.21	3.46	0.21
4	6.06	0.21	3.77	0.21
5	8.6	0.21	4.1	0.21
6	8.5	0.21	5.4	0.21
7	8.4	0.21	5.5	0.21
delayed release model
	RecQ WT		RecQ-dH
n	χv2	Estimated standard deviation (√(2/N); N = 45)	χv2	Estimated standard deviation (√(2/N); N = 45)
1	2.33	0.21	1.14	0.21
2	2.09	0.21	1.02	0.21
3	1.99	0.21	0.97	0.21
4	1.9	0.21	0.94	0.21
5	1.87	0.21	1.03	0.21
6	1.95	0.21	1.11	0.21
7	2.04	0.21	1.15	0.21
