# Supplementary material for: Homology sensing via non-linear amplification of sequence-dependent pausing by RecQ helicase
Source: eLife. 2019 Aug 29;8:e45909. doi: 10.7554/eLife.45909 (PMC6773442; doi:10.7554/eLife.45909)
Supplement: Figure 5—source data 1. [file elife-45909-fig5-data1.xlsx]

## Sheet: Fig5a_example traces
Ext0_0uM_smth.x	Ext0_0uM_smth.d	Ext0_50uM_smth.x	Ext0_50uM_smth.d	Ext0_100uM_smth.x	Ext0_100uM_smth.d	Ext0_200uM_smth.x	Ext0_200uM_smth.d	Ext0_500uM_smth.x	Ext0_500uM_smth.d
0	15.285	0	-3.225	0	-7.6119	0	-3.13536	0	14.44
0.005	14.3269	0.005	-3.91349	0.005	-6.95604	0.005	-3.53269	0.005	14.8074
0.01	12.6289	0.01	-2.9328	0.01	-6.52501	0.01	-4.18581	0.01	14.2737
0.015	9.90099	0.015	-1.00173	0.015	-5.78613	0.015	-2.88555	0.015	14.1565
0.02	7.10454	0.02	0.914518	0.02	-5.70861	0.02	-2.86201	0.02	14.3633
0.025	2.42906	0.025	1.90272	0.025	-4.90757	0.025	-4.73863	0.025	13.8107
0.03	2.79572	0.03	1.86714	0.03	-6.15753	0.03	-4.00239	0.03	12.1317
0.035	4.87695	0.035	2.18839	0.035	-6.48858	0.035	-2.14314	0.035	10.7054
0.04	6.12358	0.04	2.38961	0.04	-7.02074	0.04	-3.43648	0.04	9.67569
0.045	7.02097	0.045	1.63659	0.045	-6.75852	0.045	-3.63919	0.045	10.6098
0.05	6.93569	0.05	0.519951	0.05	-6.68565	0.05	-2.89693	0.05	11.6746
0.055	5.534	0.055	-0.526107	0.055	-7.8313	0.055	-3.15916	0.055	12.3894
0.06	3.86501	0.06	0.00180575	0.06	-9.97159	0.06	-3.23741	0.06	13.4069
0.065	4.61619	0.065	0.152089	0.065	-10.1239	0.065	-1.15402	0.065	14.1356
0.07	7.33733	0.07	1.42132	0.07	-9.92292	0.07	0.149845	0.07	14.6289
0.075	11.6346	0.075	1.72064	0.075	-8.98053	0.075	-0.322813	0.075	14.1986
0.08	19.8858	0.08	3.067	0.08	-7.93627	0.08	-0.640426	0.08	13.6089
0.085	26.8002	0.085	3.61712	0.085	-6.65811	0.085	-0.52534	0.085	14.2724
0.09	30.9014	0.09	3.72765	0.09	-6.20399	0.09	-1.63224	0.09	17.2786
0.095	28.1762	0.095	2.94736	0.095	-5.62043	0.095	-5.49534	0.095	17.5649
0.1	25.5806	0.1	0.201748	0.1	-5.86597	0.1	-7.63825	0.1	18.7291
0.105	23.5577	0.105	-1.60928	0.105	-6.34437	0.105	-8.06488	0.105	18.3267
0.11	21.8225	0.11	-2.77566	0.11	-6.33337	0.11	-8.27563	0.11	16.5766
0.115	18.7962	0.115	-4.56878	0.115	-5.67041	0.115	-6.74139	0.115	15.3772
0.12	15.3551	0.12	-6.839	0.12	-2.98256	0.12	-4.27101	0.12	15.7307
0.125	14.5963	0.125	-7.09381	0.125	-1.43339	0.125	-3.73159	0.125	14.9075
0.13	14.174	0.13	-5.44735	0.13	-3.02551	0.13	-4.27155	0.13	14.9143
0.135	13.1075	0.135	-3.88161	0.135	-3.48838	0.135	-3.44486	0.135	15.6488
0.14	14.4284	0.14	-1.67078	0.14	-4.45577	0.14	-3.50199	0.14	17.8671
0.145	15.766	0.145	0.58889	0.145	-3.33456	0.145	-4.47494	0.145	19.4541
0.15	17.1831	0.15	2.59078	0.15	-2.73343	0.15	-5.02071	0.15	19.3301
0.155	12.989	0.155	3.05872	0.155	-1.85174	0.155	-6.09152	0.155	18.6067
0.16	8.2754	0.16	3.79297	0.16	-1.55	0.16	-4.50029	0.16	19.2393
0.165	4.60533	0.165	2.86532	0.165	-2.40247	0.165	-4.66373	0.165	18.4289
0.17	1.39532	0.17	1.98298	0.17	-4.50115	0.17	-3.86418	0.17	19.3814
0.175	0.724455	0.175	2.70112	0.175	-6.36829	0.175	-4.52723	0.175	20.1655
0.18	3.56438	0.18	3.76783	0.18	-7.6949	0.18	-5.53748	0.18	19.9374
0.185	6.55861	0.185	5.00676	0.185	-8.62144	0.185	-5.40314	0.185	19.5879
0.19	10.0235	0.19	4.12832	0.19	-7.27848	0.19	-4.34294	0.19	20.9863
0.195	15.5119	0.195	2.15591	0.195	-4.78928	0.195	-4.98492	0.195	19.7498
0.2	17.3488	0.2	0.712665	0.2	-4.24171	0.2	-5.83125	0.2	17.2086
0.205	13.3531	0.205	-0.90082	0.205	-2.82199	0.205	-6.17608	0.205	14.7967
0.21	11.7368	0.21	-1.22792	0.21	-2.91252	0.21	-6.72377	0.21	13.6304
0.215	13.7934	0.215	-1.16716	0.215	-2.72813	0.215	-4.79845	0.215	13.002
0.22	19.8528	0.22	-0.224608	0.22	-3.18945	0.22	-4.54583	0.22	12.296
0.225	22.147	0.225	1.239	0.225	-2.65169	0.225	-5.65914	0.225	11.4116
0.23	22.5988	0.23	2.74455	0.23	-2.1937	0.23	-5.72114	0.23	10.6258
0.235	23.8643	0.235	2.25239	0.235	-0.781139	0.235	-6.89109	0.235	10.5941
0.24	25.91	0.24	2.85378	0.24	-0.466793	0.24	-6.01184	0.24	11.8223
0.245	26.6172	0.245	2.35985	0.245	0.626874	0.245	-8.23018	0.245	13.369
0.25	25.3715	0.25	2.22355	0.25	1.55755	0.25	-9.97588	0.25	13.3275
0.255	18.9591	0.255	1.88188	0.255	1.28523	0.255	-9.21308	0.255	12.3151
0.26	13.0773	0.26	2.10407	0.26	1.66296	0.26	-9.1361	0.26	13.893
0.265	12.5323	0.265	1.86683	0.265	1.74481	0.265	-7.82325	0.265	13.8534
0.27	9.1219	0.27	2.59109	0.27	1.1245	0.27	-6.38613	0.27	12.85
0.275	6.08921	0.275	2.19472	0.275	1.58171	0.275	-6.52319	0.275	13.6141
0.28	5.84766	0.28	3.44428	0.28	2.18091	0.28	-7.4986	0.28	15.8592
0.285	5.96706	0.285	4.32428	0.285	2.18679	0.285	-5.49834	0.285	18.819
0.29	6.90762	0.29	4.84881	0.29	2.71024	0.29	-3.68505	0.29	21.4158
0.295	7.63501	0.295	4.46204	0.295	3.03534	0.295	-3.1032	0.295	21.2754
0.3	7.11587	0.3	3.47972	0.3	1.38033	0.3	-1.84613	0.3	20.2556
0.305	7.67273	0.305	1.11584	0.305	0.566898	0.305	-2.20712	0.305	18.8356
0.31	9.87837	0.31	-0.577401	0.31	-0.334698	0.31	-0.787419	0.31	18.0696
0.315	12.3373	0.315	-1.89463	0.315	0.274412	0.315	-2.04151	0.315	15.8228
0.32	16.3516	0.32	-1.97665	0.32	1.61452	0.32	-2.33405	0.32	15.1482
0.325	15.1875	0.325	-2.3269	0.325	2.14923	0.325	-2.24033	0.325	13.5343
0.33	11.5231	0.33	-3.01538	0.33	2.1118	0.33	-3.72792	0.33	13.7292
0.335	12.4318	0.335	-1.71284	0.335	1.97981	0.335	-3.62314	0.335	14.0895
0.34	9.95384	0.34	-0.392122	0.34	2.24943	0.34	-2.93069	0.34	13.2155
0.345	7.6481	0.345	0.462709	0.345	2.72755	0.345	-3.19277	0.345	12.7211
0.35	5.15594	0.35	1.42847	0.35	3.95387	0.35	-3.60717	0.35	11.2986
0.355	5.64272	0.355	4.08611	0.355	4.53911	0.355	-4.38004	0.355	12.9373
0.36	9.31632	0.36	4.99424	0.36	5.41581	0.36	-4.92591	0.36	14.5816
0.365	13.4066	0.365	3.81134	0.365	5.62552	0.365	-6.25251	0.365	13.6445
0.37	14.8604	0.37	2.46273	0.37	4.99971	0.37	-6.72995	0.37	14.1406
0.375	18.4164	0.375	-1.21368	0.375	5.63795	0.375	-7.70425	0.375	13.1283
0.38	22.5604	0.38	-4.23444	0.38	5.01596	0.38	-7.23277	0.38	11.9943
0.385	23.8073	0.385	-4.20047	0.385	4.7222	0.385	-6.00001	0.385	11.083
0.39	25.1583	0.39	-3.17604	0.39	5.83463	0.39	-4.14409	0.39	12.2103
0.395	23.7953	0.395	-3.38717	0.395	6.92766	0.395	-3.82222	0.395	13.7142
0.4	18.4923	0.4	-4.46853	0.4	8.89794	0.4	-4.4363	0.4	13.3686
0.405	17.9834	0.405	-3.93645	0.405	9.93535	0.405	-3.87519	0.405	13.0912
0.41	19.1835	0.41	-4.15351	0.41	10.7748	0.41	-5.94774	0.41	13.3768
0.415	20.4482	0.415	-5.07311	0.415	9.03209	0.415	-6.85319	0.415	11.9061
0.42	18.7516	0.42	-6.89735	0.42	7.97361	0.42	-7.4956	0.42	10.9121
0.425	19.8539	0.425	-6.20448	0.425	5.88514	0.425	-7.04216	0.425	9.88562
0.43	24.5968	0.43	-5.15696	0.43	4.3513	0.43	-6.15001	0.43	10.4059
0.435	27.1275	0.435	-3.67707	0.435	2.75673	0.435	-5.94111	0.435	11.1113
0.44	26.9047	0.44	-1.08462	0.44	2.99711	0.44	-4.49354	0.44	13.9609
0.445	29.8841	0.445	-2.40737	0.445	4.17948	0.445	-4.53257	0.445	15.6698
0.45	34.1773	0.45	-3.73351	0.45	6.16187	0.45	-6.24584	0.45	16.1901
0.455	34.542	0.455	-1.81677	0.455	7.58196	0.455	-6.73143	0.455	17.6381
0.46	33.2747	0.46	0.853418	0.46	8.58736	0.46	-6.54181	0.46	19.7571
0.465	30.3953	0.465	0.258833	0.465	8.4961	0.465	-5.77363	0.465	22.4736
0.47	27.3871	0.47	-0.078628	0.47	9.21824	0.47	-4.12968	0.47	22.7936
0.475	27.7099	0.475	0.209965	0.475	10.9754	0.475	-0.824027	0.475	22.6944
0.48	29.7058	0.48	0.463141	0.48	15.0696	0.48	0.879704	0.48	22.6804
0.485	32.8675	0.485	0.884774	0.485	16.4777	0.485	3.14766	0.485	20.5557
0.49	30.8446	0.49	1.28314	0.49	17.6099	0.49	2.8365	0.49	20.7298
0.495	26.7039	0.495	0.827975	0.495	18.0335	0.495	1.64103	0.495	19.0228
0.5	24.518	0.5	1.36687	0.5	18.0793	0.5	-1.33173	0.5	17.4737
0.505	17.912	0.505	0.643205	0.505	17.1877	0.505	-4.74764	0.505	16.1426
0.51	10.5813	0.51	1.64399	0.51	16.1934	0.51	-5.31377	0.51	17.2642
0.515	8.52491	0.515	-0.261271	0.515	15.9918	0.515	-4.46163	0.515	18.0112
0.52	10.3548	0.52	-2.97437	0.52	16.4418	0.52	-2.23041	0.52	18.9489
0.525	15.1884	0.525	-3.8692	0.525	15.8539	0.525	-0.0138111	0.525	19.7686
0.53	22.2664	0.53	-2.58055	0.53	16.3038	0.53	1.62729	0.53	20.2353
0.535	27.5476	0.535	-2.10225	0.535	16.3415	0.535	3.25183	0.535	20.9519
0.54	28.5638	0.54	-1.23857	0.54	15.5362	0.54	3.98541	0.54	20.5828
0.545	24.8903	0.545	0.380571	0.545	16.1933	0.545	2.73255	0.545	19.5802
0.55	21.6961	0.55	1.05295	0.55	18.5174	0.55	0.854431	0.55	18.2171
0.555	21.0565	0.555	1.20331	0.555	18.6846	0.555	1.01828	0.555	17.6304
0.56	17.9694	0.56	0.600212	0.56	18.2245	0.56	1.93821	0.56	17.5751
0.565	15.8552	0.565	-0.598071	0.565	19.861	0.565	1.72742	0.565	18.1313
0.57	14.2481	0.57	0.342595	0.57	20.6578	0.57	0.425604	0.57	17.0423
0.575	13.9989	0.575	1.33099	0.575	22.0643	0.575	-0.871283	0.575	15.7185
0.58	10.6288	0.58	2.0681	0.58	21.0709	0.58	-2.78988	0.58	15.6444
0.585	8.72811	0.585	3.22662	0.585	21.4519	0.585	-3.78765	0.585	14.3448
0.59	7.96485	0.59	3.84951	0.59	22.1912	0.59	-3.43517	0.59	14.8362
0.595	8.55206	0.595	3.81251	0.595	20.8454	0.595	-4.05996	0.595	14.7739
0.6	13.726	0.6	3.35521	0.6	20.2246	0.6	-5.08847	0.6	12.989
0.605	18.9305	0.605	2.38001	0.605	20.5786	0.605	-4.94369	0.605	11.9428
0.61	22.8597	0.61	3.34928	0.61	19.3832	0.61	-4.33237	0.61	12.6874
0.615	25.213	0.615	5.13733	0.615	18.2786	0.615	-3.19531	0.615	12.6911
0.62	28.6022	0.62	5.26198	0.62	18.0362	0.62	-4.80652	0.62	11.0482
0.625	28.0746	0.625	4.87087	0.625	16.7583	0.625	-5.06393	0.625	11.9137
0.63	25.0273	0.63	3.96042	0.63	14.599	0.63	-4.24459	0.63	12.5001
0.635	19.1161	0.635	3.32909	0.635	13.7373	0.635	-3.53702	0.635	15.0323
0.64	13.1781	0.64	1.29412	0.64	13.7519	0.64	-2.9744	0.64	16.4592
0.645	10.5012	0.645	1.96913	0.645	13.8355	0.645	-3.4137	0.645	18.0203
0.65	8.70317	0.65	1.0722	0.65	15.1897	0.65	-3.50136	0.65	19.1582
0.655	10.628	0.655	2.00111	0.655	16.9115	0.655	-2.42447	0.655	19.2706
0.66	13.0008	0.66	3.21895	0.66	19.6939	0.66	-0.531885	0.66	19.1831
0.665	17.1107	0.665	5.08855	0.665	21.1636	0.665	1.68581	0.665	18.4472
0.67	24.035	0.67	6.10122	0.67	20.1838	0.67	2.84258	0.67	15.4395
0.675	26.7477	0.675	4.57727	0.675	19.6756	0.675	4.49607	0.675	12.2769
0.68	26.5716	0.68	5.50746	0.68	18.0494	0.68	4.68402	0.68	12.5867
0.685	27.8615	0.685	5.4693	0.685	15.4682	0.685	5.52619	0.685	12.4415
0.69	27.4612	0.69	3.67936	0.69	14.5645	0.69	4.52252	0.69	13.0328
0.695	27.4289	0.695	3.00678	0.695	14.0052	0.695	3.65586	0.695	13.3355
0.7	29.9133	0.7	1.38402	0.7	15.4681	0.7	2.53383	0.7	12.9438
0.705	26.2123	0.705	1.32354	0.705	17.0804	0.705	2.04121	0.705	14.0619
0.71	23.7387	0.71	0.699441	0.71	19.4783	0.71	2.11363	0.71	13.8586
0.715	20.4891	0.715	1.13038	0.715	19.4652	0.715	1.58915	0.715	13.9913
0.72	18.3265	0.72	2.49255	0.72	18.9366	0.72	1.99227	0.72	13.3025
0.725	16.5777	0.725	3.58357	0.725	17.3586	0.725	3.5139	0.725	14.1709
0.73	15.8409	0.73	3.11735	0.73	16.8484	0.73	5.41475	0.73	14.9302
0.735	17.3712	0.735	4.89139	0.735	17.0577	0.735	6.33073	0.735	16.1399
0.74	20.8109	0.74	6.72778	0.74	18.0818	0.74	7.8629	0.74	16.1356
0.745	24.2	0.745	7.8568	0.745	19.3798	0.745	8.90731	0.745	14.3406
0.75	26.4827	0.75	9.28778	0.75	21.2307	0.75	8.47149	0.75	12.467
0.755	29.8597	0.755	9.36048	0.755	22.4077	0.755	8.13716	0.755	11.0551
0.76	31.6699	0.76	8.32588	0.76	23.5597	0.76	8.44069	0.76	11.3809
0.765	32.1359	0.765	9.45951	0.765	22.1759	0.765	9.01065	0.765	11.6105
0.77	32.6496	0.77	9.01992	0.77	21.7415	0.77	9.3199	0.77	11.3861
0.775	27.831	0.775	7.89122	0.775	21.0767	0.775	9.86417	0.775	11.8938
0.78	21.6953	0.78	7.18454	0.78	21.5043	0.78	10.9808	0.78	10.84
0.785	17.535	0.785	6.11577	0.785	21.6281	0.785	11.6469	0.785	11.924
0.79	17.8564	0.79	7.1092	0.79	20.6758	0.79	10.2534	0.79	12.3087
0.795	19.8603	0.795	8.42045	0.795	20.1581	0.795	8.48493	0.795	11.5516
0.8	24.6443	0.8	8.43862	0.8	20.0569	0.8	6.89534	0.8	11.3114
0.805	27.3074	0.805	9.28187	0.805	20.1212	0.805	5.93317	0.805	12.6486
0.81	28.867	0.81	9.34128	0.81	19.8308	0.81	8.0058	0.81	14.3516
0.815	29.9021	0.815	9.44788	0.815	20.5775	0.815	8.53595	0.815	14.2476
0.82	31.8134	0.82	9.48261	0.82	20.6229	0.82	11.0132	0.82	11.4825
0.825	32.2827	0.825	10.3639	0.825	22.3753	0.825	12.021	0.825	10.7145
0.83	29.7824	0.83	10.3525	0.83	22.7956	0.83	11.5811	0.83	10.0573
0.835	25.486	0.835	10.4815	0.835	20.3521	0.835	11.7608	0.835	11.2024
0.84	23.2809	0.84	10.5554	0.84	20.2167	0.84	10.5447	0.84	12.4731
0.845	22.5386	0.845	9.39028	0.845	19.9903	0.845	10.3828	0.845	15.0257
0.85	23.8628	0.85	9.67506	0.85	22.7339	0.85	10.3216	0.85	15.996
0.855	28.1534	0.855	10.4635	0.855	23.1201	0.855	12.5498	0.855	18.1605
0.86	33.3293	0.86	10.9792	0.86	22.0429	0.86	15.1195	0.86	19.7703
0.865	41.0984	0.865	13.0673	0.865	22.0971	0.865	17.0178	0.865	18.7809
0.87	47.5124	0.87	14.3219	0.87	21.5502	0.87	16.2689	0.87	17.5041
0.875	50.2026	0.875	16.9317	0.875	22.5103	0.875	15.8349	0.875	15.8454
0.88	48.6233	0.88	17.8822	0.88	23.0035	0.88	14.6103	0.88	14.7154
0.885	42.6376	0.885	17.3972	0.885	24.7813	0.885	13.9488	0.885	13.139
0.89	38.5123	0.89	15.259	0.89	25.1951	0.89	15.6117	0.89	12.5272
0.895	38.8024	0.895	12.4365	0.895	28.2872	0.895	16.2605	0.895	13.1368
0.9	39.0596	0.9	10.9586	0.9	28.9514	0.9	16.7661	0.9	15.1818
0.905	40.157	0.905	11.9573	0.905	28.2224	0.905	17.7498	0.905	16.6608
0.91	42.6615	0.91	13.5223	0.91	27.5133	0.91	17.6669	0.91	16.5897
0.915	42.9576	0.915	13.3888	0.915	25.7218	0.915	18.7601	0.915	17.0029
0.92	41.2655	0.92	14.6475	0.92	25.7158	0.92	17.7866	0.92	16.0984
0.925	41.964	0.925	15.5594	0.925	24.8423	0.925	16.3995	0.925	14.1487
0.93	39.7406	0.93	15.8964	0.93	23.2954	0.93	15.859	0.93	14.8918
0.935	38.9186	0.935	16.7832	0.935	24.535	0.935	16.2229	0.935	14.7032
0.94	36.7608	0.94	15.1402	0.94	25.0109	0.94	16.0359	0.94	15.2927
0.945	36.7272	0.945	13.3645	0.945	25.9019	0.945	15.7897	0.945	18.0561
0.95	38.7412	0.95	11.9258	0.95	27.394	0.95	15.0664	0.95	21.2217
0.955	39.9715	0.955	12.8601	0.955	29.5301	0.955	16.0958	0.955	21.4124
0.96	39.5597	0.96	15.1595	0.96	30.0848	0.96	17.2495	0.96	21.8773
0.965	40.5345	0.965	15.3902	0.965	31.9521	0.965	19.6309	0.965	21.0327
0.97	42.1174	0.97	16.2276	0.97	32.0665	0.97	20.7592	0.97	21.3753
0.975	40.8852	0.975	16.7496	0.975	33.0212	0.975	21.0485	0.975	20.0264
0.98	41.5955	0.98	18.8247	0.98	34.2391	0.98	19.8762	0.98	19.3691
0.985	42.6283	0.985	18.4026	0.985	33.9185	0.985	18.9974	0.985	19.5952
0.99	44.095	0.99	18.0299	0.99	31.4498	0.99	18.1577	0.99	19.3756
0.995	47.148	0.995	17.1884	0.995	28.6782	0.995	17.522	0.995	17.3122
1	47.2532	1	17.3851	1	24.3637	1	16.4426	1	17.347
1.005	46.8131	1.005	18.3512	1.005	23.6468	1.005	15.5294	1.005	16.8713
1.01	43.1974	1.01	19.9762	1.01	24.691	1.01	14.8582	1.01	15.1327
1.015	39.187	1.015	21.0642	1.015	25.2797	1.015	15.0815	1.015	14.4956
1.02	36.4095	1.02	21.1634	1.02	30.1378	1.02	15.0626	1.02	14.7751
1.025	31.9982	1.025	21.0898	1.025	34.3617	1.025	14.1381	1.025	13.9273
1.03	29.0558	1.03	21.3631	1.03	35.5332	1.03	12.2182	1.03	13.1539
1.035	29.7032	1.035	18.7227	1.035	36.0479	1.035	11.7687	1.035	12.5471
1.04	32.1259	1.04	17.8143	1.04	36.2853	1.04	12.0083	1.04	12.6949
1.045	34.9856	1.045	16.5769	1.045	34.1757	1.045	13.0436	1.045	12.6516
1.05	39.354	1.05	18.1367	1.05	35.1224	1.05	14.756	1.05	15.1717
1.055	43.3854	1.055	19.9179	1.055	35.0195	1.055	15.8543	1.055	16.0169
1.06	45.0445	1.06	21.4874	1.06	34.3448	1.06	15.6775	1.06	17.7173
1.065	45.8895	1.065	23.2451	1.065	34.6197	1.065	16.949	1.065	18.164
1.07	43.9743	1.07	24.7088	1.07	33.8732	1.07	17.2832	1.07	17.6368
1.075	41.2537	1.075	25.1322	1.075	34.9842	1.075	17.2461	1.075	16.0518
1.08	37.4788	1.08	24.6199	1.08	36.667	1.08	15.8582	1.08	14.2785
1.085	35.6979	1.085	23.3556	1.085	35.7246	1.085	16.3617	1.085	12.3028
1.09	35.4249	1.09	22.1884	1.09	37.2033	1.09	15.7993	1.09	11.7798
1.095	34.4443	1.095	21.907	1.095	37.9093	1.095	15.2932	1.095	12.7167
1.1	32.823	1.1	22.4008	1.1	38.2158	1.1	14.5162	1.1	13.3471
1.105	32.7266	1.105	22.5151	1.105	37.3976	1.105	12.9293	1.105	13.1392
1.11	32.897	1.11	20.9425	1.11	36.8388	1.11	13.456	1.11	12.2711
1.115	34.7696	1.115	21.102	1.115	34.6207	1.115	14.8188	1.115	11.9282
1.12	35.8784	1.12	20.4846	1.12	34.3876	1.12	17.8158	1.12	12.437
1.125	38.714	1.125	22.2119	1.125	34.1153	1.125	20.6807	1.125	11.4605
1.13	42.6956	1.13	23.6599	1.13	33.3028	1.13	21.8189	1.13	11.564
1.135	49.5562	1.135	25.6939	1.135	33.3719	1.135	21.9218	1.135	11.9315
1.14	53.3145	1.14	27.319	1.14	33.3865	1.14	22.0629	1.14	14.1013
1.145	55.2697	1.145	28.7084	1.145	33.4412	1.145	21.8089	1.145	15.7774
1.15	53.2257	1.15	30.1587	1.15	35.0232	1.15	20.5143	1.15	16.4635
1.155	48.3641	1.155	30.4318	1.155	37.0475	1.155	21.5113	1.155	16.0882
1.16	45.8548	1.16	28.8333	1.16	38.7958	1.16	22.1505	1.16	15.7587
1.165	45.7108	1.165	28.9432	1.165	40.206	1.165	21.2123	1.165	15.835
1.17	44.2754	1.17	27.7575	1.17	41.3432	1.17	20.1558	1.17	15.3991
1.175	43.0588	1.175	29.4418	1.175	40.2514	1.175	17.0156	1.175	15.4612
1.18	43.915	1.18	29.0052	1.18	39.496	1.18	15.6743	1.18	16.6839
1.185	45.8301	1.185	28.3198	1.185	37.8697	1.185	15.6812	1.185	18.4735
1.19	44.5324	1.19	26.4689	1.19	35.7853	1.19	16.3482	1.19	20.2907
1.195	40.9062	1.195	27.176	1.195	36.1945	1.195	17.4911	1.195	21.8542
1.2	39.0512	1.2	28.3379	1.2	35.3414	1.2	17.8576	1.2	21.5157
1.205	39.4511	1.205	31.1249	1.205	35.8913	1.205	18.8205	1.205	19.9546
1.21	38.5175	1.21	33.7531	1.21	38.7202	1.21	19.7922	1.21	18.9463
1.215	41.9313	1.215	34.8974	1.215	39.6819	1.215	18.7552	1.215	18.5101
1.22	46.5397	1.22	35.1728	1.22	39.7148	1.22	17.9182	1.22	14.6934
1.225	48.0569	1.225	35.0272	1.225	38.3153	1.225	17.8561	1.225	13.5754
1.23	49.5113	1.23	31.324	1.23	36.9727	1.23	16.8042	1.23	13.7625
1.235	50.3823	1.235	28.9203	1.235	37.4632	1.235	17.1395	1.235	12.9118
1.24	51.2562	1.24	26.8304	1.24	38.297	1.24	17.846	1.24	12.0536
1.245	50.9265	1.245	26.443	1.245	38.8436	1.245	15.9303	1.245	11.2887
1.25	51.7741	1.25	27.839	1.25	39.7213	1.25	14.2919	1.25	10.8084
1.255	48.6899	1.255	27.906	1.255	41.2744	1.255	15.1697	1.255	10.4945
1.26	45.4425	1.26	27.3198	1.26	40.9427	1.26	15.697	1.26	11.8347
1.265	40.9756	1.265	28.3331	1.265	42.5569	1.265	16.6772	1.265	13.6327
1.27	40.9193	1.27	25.5957	1.27	43.0407	1.27	17.484	1.27	16.0095
1.275	42.5234	1.275	24.8131	1.275	41.4789	1.275	18.1148	1.275	18.0374
1.28	44.7573	1.28	24.4836	1.28	42.3657	1.28	17.7502	1.28	20.8791
1.285	48.669	1.285	24.3479	1.285	42.0672	1.285	16.7694	1.285	23.2566
1.29	53.3959	1.29	24.2837	1.29	42.4535	1.29	15.7599	1.29	21.1865
1.295	54.5528	1.295	26.1543	1.295	40.6365	1.295	14.6679	1.295	19.7017
1.3	53.0797	1.3	26.8323	1.3	40.4289	1.3	11.4615	1.3	18.6849
1.305	48.7266	1.305	27.4451	1.305	41.1543	1.305	11.2906	1.305	17.5897
1.31	45.867	1.31	28.9999	1.31	42.642	1.31	10.7924	1.31	16.6943
1.315	42.896	1.315	30.5746	1.315	44.76	1.315	10.9478	1.315	16.315
1.32	44.445	1.32	29.3492	1.32	43.7363	1.32	11.7311	1.32	16.9739
1.325	46.4206	1.325	28.0979	1.325	41.224	1.325	12.472	1.325	17.6351
1.33	47.2167	1.33	26.0701	1.33	36.8375	1.33	13.5704	1.33	19.1701
1.335	47.8203	1.335	25.1607	1.335	34.4368	1.335	14.7005	1.335	19.1362
1.34	50.5201	1.34	21.9982	1.34	35.2991	1.34	16.2015	1.34	20.4581
1.345	50.0039	1.345	20.5991	1.345	34.5631	1.345	16.0687	1.345	20.6239
1.35	50.2329	1.35	21.3928	1.35	37.3836	1.35	15.7488	1.35	21.4023
1.355	51.3581	1.355	21.2883	1.355	39.7317	1.355	16.5118	1.355	22.4294
1.36	52.2492	1.36	21.7879	1.36	41.9644	1.36	15.4168	1.36	22.7358
1.365	55.0274	1.365	23.0201	1.365	42.0859	1.365	14.9297	1.365	22.1443
1.37	55.0475	1.37	23.3974	1.37	42.1749	1.37	14.0398	1.37	20.5345
1.375	53.7518	1.375	23.5234	1.375	40.863	1.375	14.4476	1.375	20.1635
1.38	53.2178	1.38	22.3576	1.38	39.0188	1.38	12.6572	1.38	20.1641
1.385	50.4131	1.385	23.0166	1.385	40.271	1.385	12.016	1.385	19.2912
1.39	48.0859	1.39	21.7728	1.39	41.5714	1.39	13.4123	1.39	18.712
1.395	48.0619	1.395	21.8274	1.395	43.3306	1.395	14.0211	1.395	18.3951
1.4	46.5726	1.4	22.0232	1.4	44.5496	1.4	16.1625	1.4	18.6696
1.405	49.1105	1.405	23.2288	1.405	45.2009	1.405	17.7039	1.405	17.5769
1.41	56.1647	1.41	23.8153	1.41	46.3894	1.41	16.8913	1.41	18.0289
1.415	62.2234	1.415	23.365	1.415	45.9887	1.415	16.3277	1.415	17.6749
1.42	65.8765	1.42	23.4861	1.42	44.9467	1.42	15.2825	1.42	16.374
1.425	66.3211	1.425	21.7168	1.425	43.3571	1.425	13.7967	1.425	17.2088
1.43	63.4073	1.43	21.4717	1.43	41.0453	1.43	13.0786	1.43	19.4584
1.435	59.6054	1.435	20.324	1.435	41.2337	1.435	13.7683	1.435	21.7278
1.44	53.7227	1.44	21.0466	1.44	43.5086	1.44	14.4659	1.44	22.6953
1.445	51.5808	1.445	21.893	1.445	44.3788	1.445	17.1705	1.445	24.1397
1.45	51.7747	1.45	23.7297	1.45	44.3623	1.45	17.3257	1.45	25.9958
1.455	56.5595	1.455	24.8972	1.455	44.2312	1.455	17.9109	1.455	26.0119
1.46	62.8176	1.46	25.9263	1.46	42.4076	1.46	18.1165	1.46	25.4639
1.465	66.2304	1.465	26.4151	1.465	42.2625	1.465	17.9714	1.465	24.9611
1.47	66.2613	1.47	25.4783	1.47	42.1018	1.47	18.4601	1.47	23.7751
1.475	66.0874	1.475	25.3576	1.475	42.7179	1.475	19.3658	1.475	22.1514
1.48	63.4826	1.48	25.2378	1.48	43.8715	1.48	18.7313	1.48	21.9605
1.485	63.6189	1.485	25.4936	1.485	46.8094	1.485	19.0031	1.485	23.1614
1.49	63.753	1.49	25.5327	1.49	48.6771	1.49	20.1828	1.49	22.9662
1.495	64.3644	1.495	24.5639	1.495	49.4994	1.495	21.1098	1.495	25.2637
1.5	66.7173	1.5	25.6424	1.5	48.7221	1.5	21.2129	1.5	26.2196
1.505	69.6304	1.505	25.1081	1.505	48.4946	1.505	20.4445	1.505	24.9876
1.51	72.0137	1.51	25.1287	1.51	50.7095	1.51	18.4772	1.51	23.2769
1.515	74.7888	1.515	24.4464	1.515	50.1425	1.515	18.8953	1.515	21.6742
1.52	73.3127	1.52	23.177	1.52	49.9456	1.52	16.7119	1.52	19.9873
1.525	73.0732	1.525	21.3231	1.525	50.1269	1.525	16.2165	1.525	17.685
1.53	76.2343	1.53	19.68	1.53	49.1083	1.53	16.4047	1.53	17.4808
1.535	78.2246	1.535	18.301	1.535	49.2799	1.535	16.5831	1.535	17.5811
1.54	78.7343	1.54	19.5729	1.54	48.7092	1.54	16.3489	1.54	19.7393
1.545	79.253	1.545	22.4507	1.545	48.5898	1.545	17.8812	1.545	21.4641
1.55	76.8479	1.55	25.2257	1.55	48.0314	1.55	19.9339	1.55	21.3804
1.555	74.75	1.555	28.325	1.555	46.6271	1.555	19.2703	1.555	21.4672
1.56	73.4064	1.56	30.8662	1.56	45.7851	1.56	17.9045	1.56	21.111
1.565	72.0914	1.565	31.9489	1.565	45.9198	1.565	18.6998	1.565	22.7355
1.57	70.4485	1.57	30.6861	1.57	47.0029	1.57	17.7133	1.57	24.4427
1.575	72.1451	1.575	29.7177	1.575	47.1872	1.575	16.7392	1.575	24.6561
1.58	72.504	1.58	28.2783	1.58	50.7915	1.58	14.9296	1.58	26.9269
1.585	74.1685	1.585	27.3965	1.585	53.3031	1.585	15.27	1.585	28.3492
1.59	74.1992	1.59	25.8653	1.59	53.714	1.59	16.3148	1.59	30.2199
1.595	72.2894	1.595	25.1344	1.595	55.1958	1.595	17.2773	1.595	31.1189
1.6	71.1109	1.6	24.6596	1.6	54.9977	1.6	19.6518	1.6	31.5649
1.605	69.2894	1.605	23.2917	1.605	54.6351	1.605	21.8142	1.605	31.8995
1.61	71.5716	1.61	23.7293	1.61	54.2422	1.61	20.4073	1.61	33.1421
1.615	76.272	1.615	25.117	1.615	53.3289	1.615	19.5522	1.615	32.5944
1.62	79.9163	1.62	26.5633	1.62	52.4994	1.62	19.7248	1.62	31.3665
1.625	82.3119	1.625	26.9319	1.625	49.6123	1.625	19.9454	1.625	30.3698
1.63	84.4382	1.63	29.0953	1.63	47.4142	1.63	20.3742	1.63	27.699
1.635	83.6042	1.635	29.4807	1.635	46.0255	1.635	20.7541	1.635	25.3219
1.64	81.9927	1.64	27.5812	1.64	44.6865	1.64	19.0785	1.64	23.4806
1.645	81.1792	1.645	26.8655	1.645	42.8642	1.645	18.0036	1.645	21.8515
1.65	80.2286	1.65	27.398	1.65	42.7868	1.65	17.3135	1.65	22.3457
1.655	80.7722	1.655	27.8765	1.655	43.7323	1.655	16.1693	1.655	23.3088
1.66	81.5304	1.66	28.8982	1.66	42.6376	1.66	16.7443	1.66	24.5518
1.665	83.2251	1.665	29.2585	1.665	43.0908	1.665	17.0119	1.665	26.1964
1.67	81.2775	1.67	29.8458	1.67	44.1475	1.67	18.8961	1.67	27.3259
1.675	76.3629	1.675	30.4302	1.675	47.2562	1.675	21.5477	1.675	28.1841
1.68	72.3903	1.68	29.4437	1.68	50.2437	1.68	23.3342	1.68	27.778
1.685	68.7133	1.685	27.7687	1.685	50.992	1.685	23.8099	1.685	26.4282
1.69	65.2852	1.69	28.1106	1.69	50.5739	1.69	22.0163	1.69	26.0617
1.695	65.9049	1.695	28.2865	1.695	48.8812	1.695	21.6125	1.695	26.5957
1.7	68.8296	1.7	32.724	1.7	48.0218	1.7	23.0249	1.7	26.3134
1.705	70.9241	1.705	36.2083	1.705	46.307	1.705	23.7217	1.705	26.7679
1.71	71.6166	1.71	39.4937	1.71	44.6237	1.71	22.9352	1.71	27.2853
1.715	70.6355	1.715	39.0533	1.715	44.9597	1.715	22.2383	1.715	25.5125
1.72	71.4332	1.72	39.0467	1.72	44.5674	1.72	21.8158	1.72	24.8828
1.725	73.8961	1.725	38.2286	1.725	45.6707	1.725	20.4856	1.725	25.3998
1.73	76.9769	1.73	35.2919	1.73	45.6725	1.73	20.7356	1.73	24.6667
1.735	80.261	1.735	33.8429	1.735	45.0234	1.735	22.1713	1.735	25.8813
1.74	80.323	1.74	32.4036	1.74	44.1984	1.74	21.6716	1.74	28.9066
1.745	78.8417	1.745	32.8528	1.745	44.4116	1.745	20.6679	1.745	30.9621
1.75	75.317	1.75	34.2303	1.75	43.1204	1.75	21.6132	1.75	31.4377
1.755	71.6165	1.755	36.1403	1.755	40.8201	1.755	22.5281	1.755	31.6077
1.76	69.0066	1.76	39.049	1.76	41.4414	1.76	22.0761	1.76	30.853
1.765	71.3142	1.765	38.6057	1.765	42.0573	1.765	21.5933	1.765	29.4276
1.77	75.9411	1.77	39.4401	1.77	42.9784	1.77	21.7431	1.77	26.9173
1.775	82.0626	1.775	40.0274	1.775	42.2678	1.775	22.4554	1.775	25.8679
1.78	88.8621	1.78	40.593	1.78	41.7021	1.78	23.3563	1.78	24.7757
1.785	90.5229	1.785	38.9664	1.785	43.0577	1.785	23.5413	1.785	22.9667
1.79	86.9102	1.79	39.7514	1.79	41.7835	1.79	22.3682	1.79	24.3076
1.795	80.1761	1.795	40.0942	1.795	42.7424	1.795	20.8976	1.795	25.4212
1.8	73.008	1.8	38.7191	1.8	44.5801	1.8	20.8908	1.8	25.5474
1.805	65.7631	1.805	38.5985	1.805	46.5499	1.805	22.1781	1.805	26.2903
1.81	62.8719	1.81	38.3846	1.81	48.8839	1.81	23.536	1.81	26.6279
1.815	60.8446	1.815	35.8741	1.815	49.9002	1.815	24.1182	1.815	26.1776
1.82	60.6763	1.82	35.4475	1.82	48.1168	1.82	24.3253	1.82	26.0859
1.825	62.6117	1.825	34.8997	1.825	43.7412	1.825	24.7603	1.825	24.7326
1.83	64.8223	1.83	36.5697	1.83	42.7557	1.83	26.3134	1.83	24.7411
1.835	69.4782	1.835	36.2525	1.835	41.7457	1.835	27.0659	1.835	26.017
1.84	73.4172	1.84	36.3308	1.84	42.5978	1.84	28.2572	1.84	27.037
1.845	72.9717	1.845	37.8087	1.845	43.7532	1.845	29.4783	1.845	29.8175
1.85	75.2531	1.85	37.9934	1.85	46.0219	1.85	29.2409	1.85	31.0887
1.855	74.8587	1.855	37.7941	1.855	48.6412	1.855	26.2752	1.855	31.3362
1.86	68.6785	1.86	39.0701	1.86	47.8858	1.86	23.6359	1.86	31.8542
1.865	61.489	1.865	39.3321	1.865	47.2042	1.865	21.6184	1.865	31.2017
1.87	54.7826	1.87	40.1271	1.87	45.6081	1.87	20.7849	1.87	29.964
1.875	51.5502	1.875	40.4568	1.875	46.834	1.875	19.9618	1.875	29.9096
1.88	51.3897	1.88	41.1879	1.88	49.0201	1.88	20.0717	1.88	29.2877
1.885	54.6015	1.885	39.975	1.885	51.1467	1.885	21.1633	1.885	29.5001
1.89	57.4447	1.89	40.5341	1.89	51.8711	1.89	20.7645	1.89	31.1588
1.895	63.1983	1.895	39.2808	1.895	52.7981	1.895	20.513	1.895	29.9712
1.9	67.177	1.9	40.1254	1.9	54.7377	1.9	20.4379	1.9	29.369
1.905	69.8548	1.905	39.3083	1.905	53.8337	1.905	18.0459	1.905	27.7276
1.91	74.921	1.91	37.8667	1.91	52.3344	1.91	18.5686	1.91	24.2906
1.915	72.7316	1.915	37.8459	1.915	49.3927	1.915	19.2529	1.915	23.2267
1.92	71.5171	1.92	37.6621	1.92	46.8577	1.92	20.1745	1.92	22.7736
1.925	73.625	1.925	38.4141	1.925	46.0207	1.925	19.6911	1.925	23.2878
1.93	75.5591	1.93	38.727	1.93	44.9935	1.93	19.1331	1.93	24.1264
1.935	76.4079	1.935	37.3678	1.935	43.6334	1.935	17.8538	1.935	24.7546
1.94	74.9686	1.94	36.0608	1.94	42.5391	1.94	17.4377	1.94	24.1906
1.945	77.509	1.945	36.4479	1.945	43.3109	1.945	18.8856	1.945	24.8124
1.95	80.3039	1.95	36.8632	1.95	43.9387	1.95	20.9819	1.95	23.2577
1.955	84.8638	1.955	37.4477	1.955	44.4414	1.955	22.6632	1.955	23.1027
1.96	81.9169	1.96	38.3723	1.96	45.1104	1.96	23.5012	1.96	22.7438
1.965	78.0492	1.965	35.9485	1.965	46.6513	1.965	24.3208	1.965	21.3006
1.97	74.4106	1.97	32.8121	1.97	48.3601	1.97	25.5837	1.97	20.5371
1.975	71.0192	1.975	29.7297	1.975	48.3647	1.975	26.2847	1.975	20.0581
1.98	75.5725	1.98	26.7581	1.98	49.231	1.98	27.3047	1.98	19.9446
1.985	80.2257	1.985	26.0833	1.985	49.9311	1.985	27.0046	1.985	21.4809
1.99	80.9147	1.99	27.2161	1.99	49.7946	1.99	27.6183	1.99	23.8464
1.995	85.4915	1.995	30.7831	1.995	51.6178	1.995	27.2272	1.995	27.8185
2	91.8253	2	35.3061	2	52.0722	2	28.5146	2	29.7131
2.005	95.1466	2.005	38.4185	2.005	51.4329	2.005	27.9187	2.005	30.6531
2.01	94.3472	2.01	38.1131	2.01	51.3265	2.01	26.4228	2.01	29.7461
2.015	93.9576	2.015	37.4515	2.015	48.3243	2.015	25.3263	2.015	28.5172
2.02	92.0474	2.02	35.3492	2.02	44.8546	2.02	24.9962	2.02	26.1887
2.025	91.11	2.025	34.6713	2.025	41.6657	2.025	23.999	2.025	25.4047
2.03	88.8641	2.03	35.3153	2.03	40.472	2.03	23.9492	2.03	25.7537
2.035	85.1272	2.035	36.0697	2.035	41.0538	2.035	24.3777	2.035	26.4084
2.04	83.3088	2.04	36.3954	2.04	41.2506	2.04	23.8065	2.04	27.8519
2.045	78.784	2.045	37.7361	2.045	42.1863	2.045	24.3988	2.045	28.8466
2.05	78.7785	2.05	35.8682	2.05	44.0916	2.05	26.3967	2.05	30.0163
2.055	81.7332	2.055	35.4136	2.055	46.8551	2.055	28.501	2.055	28.6265
2.06	83.2687	2.06	33.5531	2.06	49.0946	2.06	29.9623	2.06	28.2749
2.065	84.429	2.065	32.1801	2.065	50.5111	2.065	28.6705	2.065	28.6839
2.07	84.6267	2.07	32.1634	2.07	52.0877	2.07	29.4409	2.07	27.7229
2.075	83.2421	2.075	31.8673	2.075	53.0083	2.075	28.5485	2.075	27.1328
2.08	80.5969	2.08	32.1532	2.08	52.8668	2.08	27.6627	2.08	26.5307
2.085	81.579	2.085	32.3095	2.085	50.3556	2.085	27.0555	2.085	26.0606
2.09	81.7524	2.09	32.4022	2.09	46.6789	2.09	25.1111	2.09	26.1534
2.095	80.2374	2.095	33.5106	2.095	43.5352	2.095	24.5439	2.095	25.8036
2.1	79.1846	2.1	34.9142	2.1	41.6548	2.1	24.7408	2.1	25.8116
2.105	80.1011	2.105	36.4527	2.105	41.9337	2.105	27.1054	2.105	25.5292
2.11	85.0801	2.11	37.3849	2.11	42.343	2.11	28.1581	2.11	25.2401
2.115	86.9073	2.115	37.8373	2.115	45.3566	2.115	27.4275	2.115	26.3509
2.12	84.7971	2.12	34.9981	2.12	48.0432	2.12	28.0512	2.12	27.0383
2.125	85.1921	2.125	34.4454	2.125	49.6585	2.125	28.1703	2.125	26.109
2.13	88.429	2.13	34.1723	2.13	49.101	2.13	27.6363	2.13	25.4319
2.135	88.5774	2.135	35.9804	2.135	47.4747	2.135	25.6857	2.135	25.2216
2.14	88.6458	2.14	38.0721	2.14	47.8023	2.14	25.1031	2.14	24.457
2.145	90.0454	2.145	38.834	2.145	46.7625	2.145	24.7173	2.145	25.3014
2.15	89.9277	2.15	40.2509	2.15	45.2511	2.15	25.8868	2.15	25.3881
2.155	90.2971	2.155	40.5735	2.155	46.2677	2.155	27.2527	2.155	26.4464
2.16	90.3365	2.16	37.8981	2.16	47.293	2.16	26.7224	2.16	28.0283
2.165	85.406	2.165	35.0893	2.165	48.4859	2.165	28.1567	2.165	28.04
2.17	79.975	2.17	34.0317	2.17	49.6643	2.17	26.2875	2.17	27.8383
2.175	75.6883	2.175	34.3802	2.175	50.5632	2.175	24.3273	2.175	27.4227
2.18	77.3094	2.18	36.9035	2.18	48.449	2.18	23.6684	2.18	26.0812
2.185	79.3093	2.185	40.5612	2.185	48.0945	2.185	23.1611	2.185	26.0939
2.19	80.5988	2.19	40.2435	2.19	49.6003	2.19	22.6446	2.19	26.7499
2.195	83.3218	2.195	38.0507	2.195	51.7894	2.195	23.3269	2.195	27.2688
2.2	86.9048	2.2	36.321	2.2	51.1759	2.2	25.5446	2.2	28.1937
2.205	88.7986	2.205	35.8299	2.205	50.2163	2.205	26.8923	2.205	28.7982
2.21	89.3975	2.21	36.1681	2.21	49.0928	2.21	27.7908	2.21	26.5945
2.215	92.1862	2.215	35.5296	2.215	46.6253	2.215	28.8334	2.215	25.0924
2.22	93.8623	2.22	37.3227	2.22	44.5256	2.22	28.4256	2.22	23.6036
2.225	96.0551	2.225	41.4592	2.225	43.3502	2.225	27.8437	2.225	23.0489
2.23	101.846	2.23	42.1756	2.23	42.1528	2.23	25.9037	2.23	25.1535
2.235	101.71	2.235	41.0442	2.235	40.4367	2.235	26.0913	2.235	25.9804
2.24	99.9615	2.24	40.0417	2.24	41.2741	2.24	24.7905	2.24	26.0334
2.245	94.9157	2.245	39.0322	2.245	42.5917	2.245	23.7329	2.245	26.4088
2.25	92.2254	2.25	37.3973	2.25	42.6193	2.25	23.0914	2.25	25.8229
2.255	85.7887	2.255	37.4472	2.255	44.4903	2.255	25.7619	2.255	23.0102
2.26	83.4652	2.26	36.8796	2.26	46.7522	2.26	26.3284	2.26	20.6342
2.265	80.9123	2.265	36.5982	2.265	48.3564	2.265	27.5117	2.265	19.3271
2.27	83.176	2.27	37.7992	2.27	47.3139	2.27	29.79	2.27	19.702
2.275	88.6477	2.275	38.3299	2.275	48.0114	2.275	30.5735	2.275	21.5683
2.28	93.3921	2.28	40.0254	2.28	46.1907	2.28	30.8106	2.28	23.0604
2.285	100.094	2.285	39.7134	2.285	45.1639	2.285	30.1908	2.285	24.8742
2.29	102.653	2.29	39.9906	2.29	45.2403	2.29	28.071	2.29	25.7951
2.295	102.554	2.295	40.4029	2.295	46.5204	2.295	27.6497	2.295	26.4123
2.3	104.566	2.3	39.7879	2.3	49.9385	2.3	25.7121	2.3	26.7053
2.305	104.218	2.305	36.9684	2.305	52.5218	2.305	24.6112	2.305	27.186
2.31	104.181	2.31	35.4754	2.31	53.4649	2.31	24.4178	2.31	26.9546
2.315	101.744	2.315	37.6392	2.315	53.2617	2.315	25.2235	2.315	27.4641
2.32	100.887	2.32	38.8148	2.32	50.5363	2.32	25.9667	2.32	28.2757
2.325	99.8893	2.325	40.4025	2.325	47.5369	2.325	28.5912	2.325	28.8069
2.33	97.8905	2.33	41.9771	2.33	46.5546	2.33	29.0718	2.33	29.2135
2.335	95.0242	2.335	42.4984	2.335	46.4003	2.335	29.3999	2.335	29.4956
2.34	93.7269	2.34	42.0471	2.34	44.2526	2.34	29.5997	2.34	29.2169
2.345	93.6354	2.345	38.2954	2.345	45.7684	2.345	28.7616	2.345	28.5201
2.35	93.907	2.35	36.1028	2.35	46.1655	2.35	28.2073	2.35	28.5162
2.355	95.1707	2.355	35.2187	2.355	46.8548	2.355	26.9837	2.355	29.071
2.36	95.7037	2.36	36.0059	2.36	48.476	2.36	25.6133	2.36	29.9989
2.365	96.4324	2.365	35.9508	2.365	48.6203	2.365	25.8116	2.365	33.1558
2.37	95.8164	2.37	37.4434	2.37	49.0725	2.37	26.2866	2.37	33.5361
2.375	94.2567	2.375	37.5469	2.375	48.9497	2.375	26.7239	2.375	34.3468
2.38	93.5921	2.38	36.5881	2.38	47.4104	2.38	26.6952	2.38	35.768
2.385	94.4174	2.385	35.3236	2.385	46.7623	2.385	28.7074	2.385	34.7851
2.39	98.0921	2.39	33.2615	2.39	45.9908	2.39	29.682	2.39	32.7287
2.395	100.279	2.395	31.8086	2.395	42.6306	2.395	31.2239	2.395	31.8958
2.4	102.039	2.4	32.6519	2.4	41.6331	2.4	30.7522	2.4	32.3957
2.405	102.284	2.405	33.0831	2.405	43.7129	2.405	29.4938	2.405	32.4166
2.41	99.5313	2.41	33.8245	2.41	45.7726	2.41	28.1089	2.41	32.7176
2.415	94.6469	2.415	34.7674	2.415	48.288	2.415	27.3406	2.415	31.3019
2.42	90.7229	2.42	36.6738	2.42	48.4647	2.42	26.8603	2.42	29.7862
2.425	86.3221	2.425	39.2004	2.425	45.8255	2.425	27.8547	2.425	27.0768
2.43	83.4689	2.43	41.9522	2.43	45.4487	2.43	28.027	2.43	25.5785
2.435	86.3638	2.435	42.7619	2.435	42.9866	2.435	29.2784	2.435	25.3638
2.44	89.8265	2.44	42.8625	2.44	41.6178	2.44	30.4533	2.44	24.7444
2.445	94.3948	2.445	42.4797	2.445	40.192	2.445	31.362	2.445	23.4915
2.45	96.8177	2.45	42.5797	2.45	41.3244	2.45	29.8704	2.45	24.507
2.455	99.0302	2.455	41.6942	2.455	43.0398	2.455	29.765	2.455	25.0109
2.46	103.82	2.46	39.6917	2.46	44.9216	2.46	27.3521	2.46	25.4011
2.465	104.686	2.465	38.1112	2.465	43.8166	2.465	25.718	2.465	26.0656
2.47	107.337	2.47	39.8326	2.47	43.7994	2.47	27.4359	2.47	25.6271
2.475	108.027	2.475	41.7946	2.475	43.9606	2.475	29.671	2.475	25.0352
2.48	107.788	2.48	43.1342	2.48	45.5795	2.48	30.8928	2.48	26.2253
2.485	109.047	2.485	43.4837	2.485	47.0939	2.485	31.0026	2.485	27.9913
2.49	111.297	2.49	43.6143	2.49	46.5219	2.49	30.9847	2.49	29.1292
2.495	109.721	2.495	43.5382	2.495	48.6308	2.495	30.4362	2.495	28.6261
2.5	108.376	2.5	43.9623	2.5	50.3711	2.5	28.0474	2.5	29.2443
2.505	106.318	2.505	43.3266	2.505	49.6217	2.505	27.8004	2.505	30.7323
2.51	104.737	2.51	41.887	2.51	49.3493	2.51	27.4116	2.51	32.4801
2.515	102.748	2.515	39.0631	2.515	48.3052	2.515	28.4916	2.515	31.2148
2.52	99.0749	2.52	37.3858	2.52	46.5587	2.52	30.0668	2.52	29.6361
2.525	96.2461	2.525	37.8363	2.525	46.4448	2.525	31.9947	2.525	28.2683
2.53	96.4659	2.53	37.6263	2.53	45.3671	2.53	32.6299	2.53	28.2372
2.535	97.753	2.535	37.0092	2.535	44.082	2.535	30.7849	2.535	30.2329
2.54	101.866	2.54	36.6954	2.54	45.7562	2.54	30.3727	2.54	30.2227
2.545	104.869	2.545	36.6784	2.545	46.4024	2.545	30.4759	2.545	30.3217
2.55	103.112	2.55	37.09	2.55	48.7762	2.55	28.6306	2.55	30.8791
2.555	100.862	2.555	38.0092	2.555	50.2857	2.555	27.1823	2.555	32.4454
2.56	97.3355	2.56	38.269	2.56	50.2632	2.56	27.4633	2.56	32.95
2.565	92.2204	2.565	37.8044	2.565	50.4052	2.565	27.8897	2.565	31.7449
2.57	90.6546	2.57	39.7017	2.57	49.613	2.57	26.3491	2.57	30.6664
2.575	88.7935	2.575	39.8805	2.575	49.4629	2.575	27.5769	2.575	31.2622
2.58	91.9928	2.58	41.7893	2.58	49.4731	2.58	29.4946	2.58	32.1201
2.585	96.0605	2.585	41.2814	2.585	50.3585	2.585	30.0354	2.585	31.8416
2.59	102.217	2.59	39.727	2.59	49.5481	2.59	29.7523	2.59	30.7967
2.595	106.343	2.595	39.2424	2.595	48.9516	2.595	28.3569	2.595	29.2925
2.6	108.189	2.6	38.3491	2.6	48.243	2.6	26.0985	2.6	29.1857
2.605	104.86	2.605	39.1354	2.605	47.3585	2.605	25.6859	2.605	28.8177
2.61	105.517	2.61	40.0118	2.61	49.0503	2.61	26.0644	2.61	26.7824
2.615	108.614	2.615	40.4948	2.615	50.6636	2.615	27.2687	2.615	25.4577
2.62	112.614	2.62	41.6183	2.62	49.6015	2.62	27.9956	2.62	25.4691
2.625	113.906	2.625	43.9526	2.625	47.8249	2.625	28.9548	2.625	26.8649
2.63	111.244	2.63	42.6123	2.63	47.9058	2.63	30.0113	2.63	27.9045
2.635	105.748	2.635	40.3145	2.635	44.9829	2.635	31.328	2.635	29.8557
2.64	103.104	2.64	38.628	2.64	44.873	2.64	31.1068	2.64	31.1312
2.645	100.929	2.645	36.0135	2.645	45.2451	2.645	30.6929	2.645	31.4989
2.65	99.7144	2.65	35.6704	2.65	45.9436	2.65	30.2153	2.65	32.4468
2.655	101.992	2.655	36.7429	2.655	48.3391	2.655	30.3755	2.655	33.7397
2.66	108.012	2.66	36.7898	2.66	50.7265	2.66	29.8502	2.66	33.5783
2.665	114.837	2.665	37.0055	2.665	51.4834	2.665	28.6551	2.665	33.0473
2.67	120.424	2.67	37.3686	2.67	50.3815	2.67	27.9391	2.67	34.3058
2.675	118.979	2.675	37.1959	2.675	47.5809	2.675	28.0962	2.675	35.5344
2.68	117.501	2.68	35.5903	2.68	45.2809	2.68	29.2316	2.68	36.0285
2.685	113.088	2.685	31.7027	2.685	46.7076	2.685	30.6837	2.685	34.4332
2.69	112.302	2.69	30.5165	2.69	45.6741	2.69	30.5288	2.69	32.7677
2.695	114.519	2.695	31.3442	2.695	46.399	2.695	30.0172	2.695	31.2779
2.7	118.168	2.7	31.589	2.7	47.5776	2.7	29.9869	2.7	29.2324
2.705	118.357	2.705	33.1219	2.705	46.955	2.705	30.2138	2.705	28.8833
2.71	120.32	2.71	34.6113	2.71	47.3789	2.71	30.5005	2.71	31.0846
2.715	119.413	2.715	36.6677	2.715	46.8243	2.715	29.0593	2.715	31.6014
2.72	114.182	2.72	37.4951	2.72	46.6574	2.72	26.7749	2.72	30.965
2.725	112.468	2.725	38.7167	2.725	48.1882	2.725	26.7954	2.725	30.3068
2.73	109.864	2.73	37.196	2.73	51.2373	2.73	26.4299	2.73	29.7475
2.735	109.017	2.735	36.6988	2.735	53.0426	2.735	26.3785	2.735	28.1261
2.74	111.504	2.74	37.0284	2.74	53.8368	2.74	27.8898	2.74	27.5785
2.745	114.873	2.745	37.0181	2.745	54.1551	2.745	28.5347	2.745	27.3558
2.75	117.469	2.75	35.3881	2.75	53.4217	2.75	28.2437	2.75	28.7976
2.755	119.328	2.755	32.383	2.755	52.1084	2.755	30.4737	2.755	30.5878
2.76	120.844	2.76	31.1561	2.76	49.4505	2.76	30.7178	2.76	34.4104
2.765	124.624	2.765	32.0794	2.765	48.503	2.765	30.0134	2.765	35.8651
2.77	129.77	2.77	32.7323	2.77	47.5056	2.77	29.1915	2.77	34.325
2.775	132.579	2.775	33.4497	2.775	49.1738	2.775	27.4076	2.775	32.2989
2.78	132.996	2.78	32.7129	2.78	48.5756	2.78	26.676	2.78	32.721
2.785	129.774	2.785	33.2159	2.785	47.4496	2.785	25.9054	2.785	34.0948
2.79	122.941	2.79	32.3862	2.79	46.2983	2.79	24.9827	2.79	33.6982
2.795	118.335	2.795	31.3099	2.795	47.2812	2.795	26.495	2.795	32.7156
2.8	113.559	2.8	29.1994	2.8	49.1362	2.8	27.1372	2.8	31.7521
2.805	109.748	2.805	29.5181	2.805	48.6526	2.805	30.6877	2.805	29.3572
2.81	108.538	2.81	31.5225	2.81	49.4479	2.81	33.3219	2.81	28.6969
2.815	110.232	2.815	34.1479	2.815	50.7266	2.815	35.2766	2.815	27.5791
2.82	112.724	2.82	36.1286	2.82	52.5953	2.82	34.5328	2.82	26.8334
2.825	117.017	2.825	34.638	2.825	53.9486	2.825	33.7249	2.825	28.703
2.83	118.231	2.83	32.8464	2.83	56.7837	2.83	32.6479	2.83	32.9623
2.835	118.061	2.835	32.2868	2.835	58.341	2.835	30.8312	2.835	36.2117
2.84	122.004	2.84	33.7532	2.84	58.6795	2.84	31.1072	2.84	36.2999
2.845	127.039	2.845	34.8754	2.845	61.6861	2.845	31.0468	2.845	36.4248
2.85	128.126	2.85	36.2661	2.85	60.7386	2.85	32.611	2.85	34.5026
2.855	127.061	2.855	37.8309	2.855	57.3972	2.855	33.9587	2.855	32.8761
2.86	126.376	2.86	38.2514	2.86	55.2003	2.86	33.029	2.86	31.6159
2.865	128.985	2.865	38.0489	2.865	54.5761	2.865	32.5152	2.865	32.8114
2.87	131.55	2.87	37.3467	2.87	54.5295	2.87	31.9311	2.87	32.8832
2.875	133.838	2.875	36.802	2.875	54.186	2.875	33.8082	2.875	33.7422
2.88	134.285	2.88	36.092	2.88	56.5004	2.88	33.8745	2.88	33.9476
2.885	132.135	2.885	34.8788	2.885	59.8224	2.885	33.8732	2.885	33.0085
2.89	130.508	2.89	37.0183	2.89	60.8058	2.89	33.6547	2.89	32.1851
2.895	127.779	2.895	37.1724	2.895	60.3553	2.895	33.2018	2.895	32.9626
2.9	126.626	2.9	36.2324	2.9	59.1654	2.9	33.1391	2.9	34.2265
2.905	126.571	2.905	35.1672	2.905	56.8251	2.905	31.7476	2.905	35.4041
2.91	131.248	2.91	35.3108	2.91	55.5489	2.91	31.101	2.91	34.9158
2.915	139.374	2.915	34.0427	2.915	56.7291	2.915	32.4242	2.915	34.1799
2.92	147.155	2.92	35.1683	2.92	55.3799	2.92	35.0133	2.92	33.1573
2.925	153.789	2.925	36.1194	2.925	54.3926	2.925	37.0898	2.925	32.3664
2.93	154.468	2.93	36.1577	2.93	56.3228	2.93	36.9969	2.93	32.2012
2.935	153.442	2.935	36.9558	2.935	58.7134	2.935	36.3158	2.935	32.9154
2.94	148.28	2.94	36.4296	2.94	59.8547	2.94	34.6631	2.94	31.5949
2.945	141.523	2.945	36.2988	2.945	59.7263	2.945	33.6529	2.945	32.9676
2.95	136.516	2.95	35.6864	2.95	58.8307	2.95	32.9819	2.95	34.707
2.955	135.527	2.955	33.0386	2.955	59.42	2.955	32.9057	2.955	34.1874
2.96	139.523	2.96	32.4926	2.96	59.3195	2.96	34.6158	2.96	33.9884
2.965	138.158	2.965	33.7218	2.965	58.9918	2.965	33.7117	2.965	33.8531
2.97	137.258	2.97	37.3515	2.97	57.6786	2.97	34.6127	2.97	33.3607
2.975	137.005	2.975	38.9562	2.975	56.4231	2.975	33.443	2.975	33.1145
2.98	134.635	2.98	39.875	2.98	57.7578	2.98	32.2112	2.98	33.946
2.985	130.569	2.985	39.1421	2.985	61.4	2.985	32.76	2.985	32.899
2.99	129.927	2.99	39.309	2.99	61.9442	2.99	32.3764	2.99	32.9077
2.995	131.565	2.995	38.0465	2.995	61.8443	2.995	31.8874	2.995	34.2751
3	132.549	3	34.7679	3	60.8248	3	31.0417	3	35.3797
3.005	135.01	3.005	32.2732	3.005	60.7929	3.005	32.1422	3.005	36.9858
3.01	138.836	3.01	30.4018	3.01	61.7051	3.01	30.8344	3.01	36.4842
3.015	138.237	3.015	28.8815	3.015	62.2359	3.015	29.9909	3.015	36.4765
3.02	135.492	3.02	29.9377	3.02	60.8263	3.02	30.4145	3.02	36.7108
3.025	134.244	3.025	28.4829	3.025	60.3064	3.025	30.3812	3.025	34.1274
3.03	135.545	3.03	28.9548	3.03	60.6607	3.03	32.5168	3.03	31.8214
3.035	132.388	3.035	30.4323	3.035	60.6767	3.035	33.155	3.035	31.4219
3.04	129.846	3.04	33.881	3.04	61.9605	3.04	35.5377	3.04	31.4013
3.045	129.765	3.045	34.196	3.045	60.6754	3.045	36.2292	3.045	31.1458
3.05	132.834	3.05	35.6709	3.05	61.0649	3.05	35.4191	3.05	32.3018
3.055	133.386	3.055	37.5578	3.055	63.4968	3.055	35.6292	3.055	32.7548
3.06	135.179	3.06	38.8702	3.06	65.2914	3.06	34.7092	3.06	32.6388
3.065	137.154	3.065	39.9287	3.065	67.0945	3.065	33.7777	3.065	33.1022
3.07	138.126	3.07	39.3209	3.07	67.8053	3.07	32.6739	3.07	31.2957
3.075	137.094	3.075	37.5829	3.075	68.5117	3.075	32.6427	3.075	31.0848
3.08	138.787	3.08	35.2215	3.08	70.8122	3.08	33.6105	3.08	29.6091
3.085	136.285	3.085	34.2186	3.085	71.9528	3.085	33.0449	3.085	29.5273
3.09	135.817	3.09	35.2304	3.09	71.793	3.09	33.1815	3.09	29.6128
3.095	137.601	3.095	34.7195	3.095	69.8913	3.095	32.3115	3.095	30.2397
3.1	138.927	3.1	35.7486	3.1	68.7561	3.1	31.3684	3.1	31.0813
3.105	137.606	3.105	37.6906	3.105	66.4807	3.105	31.8461	3.105	31.4844
3.11	135.466	3.11	38.5901	3.11	67.6712	3.11	31.8124	3.11	30.8572
3.115	133.641	3.115	38.3193	3.115	68.2428	3.115	34.1456	3.115	27.8298
3.12	135.98	3.12	39.6631	3.12	69.9035	3.12	33.6897	3.12	28.0094
3.125	137.442	3.125	39.7823	3.125	71.0499	3.125	34.5212	3.125	28.5664
3.13	134.986	3.13	38.64	3.13	70.5022	3.13	35.2833	3.13	29.8541
3.135	132.795	3.135	38.4433	3.135	69.7212	3.135	34.5817	3.135	30.5489
3.14	130.372	3.14	37.9684	3.14	65.7918	3.14	32.5498	3.14	30.9985
3.145	127.3	3.145	36.3743	3.145	62.127	3.145	26.9827	3.145	32.9785
3.15	124.865	3.15	35.0715	3.15	59.7475	3.15	24.4112	3.15	33.2668
3.155	121.388	3.155	35.3179	3.155	59.1655	3.155	21.3158	3.155	32.4974
3.16	124.636	3.16	36.4664	3.16	60.9576	3.16	19.8425	3.16	30.5293
3.165	132.718	3.165	39.099	3.165	63.4835	3.165	20.0095	3.165	29.8983
3.17	143.75	3.17	38.7899	3.17	67.9222	3.17	22.6059	3.17	30.5615
3.175	153.109	3.175	39.6982	3.175	69.0279	3.175	27.1794	3.175	33.4225
3.18	161.35	3.18	37.0859	3.18	70.7672	3.18	30.0668	3.18	36.6036
3.185	163.466	3.185	35.0273	3.185	70.7882	3.185	32.7766	3.185	37.0971
3.19	164.327	3.19	34.204	3.19	70.3943	3.19	33.636	3.19	36.8721
3.195	163.043	3.195	33.1589	3.195	69.4465	3.195	34.6015	3.195	35.7574
3.2	157.867	3.2	32.8761	3.2	67.9862	3.2	32.8279	3.2	34.3535
3.205	151.888	3.205	33.7914	3.205	68.0092	3.205	31.8314	3.205	30.0604
3.21	148.751	3.21	36.1351	3.21	67.4518	3.21	30.9711	3.21	27.9732
3.215	147.984	3.215	36.5311	3.215	67.9964	3.215	28.834	3.215	28.0748
3.22	147.533	3.22	38.0602	3.22	68.8551	3.22	29.3071	3.22	28.9892
3.225	144.978	3.225	37.9144	3.225	70.2779	3.225	28.6467	3.225	30.6921
3.23	146.64	3.23	37.734	3.23	70.5931	3.23	28.4403	3.23	31.0669
3.235	148.126	3.235	38.526	3.235	72.4737	3.235	28.198	3.235	32.6423
3.24	150.111	3.24	37.1454	3.24	75.6292	3.24	28.2483	3.24	31.4166
3.245	148.543	3.245	37.9582	3.245	76.3062	3.245	27.9552	3.245	29.6954
3.25	149.415	3.25	38.2388	3.25	76.0419	3.25	28.5439	3.25	27.857
3.255	146.48	3.255	39.3624	3.255	75.1591	3.255	27.0335	3.255	27.1372
3.26	146.659	3.26	38.0681	3.26	72.6815	3.26	27.0021	3.26	27.6957
3.265	146.122	3.265	35.939	3.265	69.8371	3.265	30.0117	3.265	30.6867
3.27	148.265	3.27	33.4609	3.27	66.8294	3.27	31.1469	3.27	34.5877
3.275	150.624	3.275	32.4003	3.275	63.1805	3.275	33.6708	3.275	36.0356
3.28	155.444	3.28	30.6409	3.28	61.7946	3.28	32.7537	3.28	36.3304
3.285	161.485	3.285	32.1385	3.285	59.034	3.285	30.3238	3.285	34.7337
3.29	163.773	3.29	35.0633	3.29	59.2323	3.29	29.2658	3.29	32.7493
3.295	161.002	3.295	38.8751	3.295	58.037	3.295	26.8076	3.295	31.3954
3.3	162.244	3.3	42.0132	3.3	54.6426	3.3	25.5789	3.3	29.508
3.305	162.752	3.305	43.5635	3.305	52.2238	3.305	25.6553	3.305	31.5646
3.31	164.161	3.31	43.2905	3.31	52.2273	3.31	25.3003	3.31	34.8331
3.315	162.958	3.315	40.8839	3.315	50.2634	3.315	26.8527	3.315	37.4924
3.32	161.283	3.32	38.8234	3.32	47.6618	3.32	28.8999	3.32	37.1149
3.325	158.04	3.325	37.9723	3.325	46.5117	3.325	31.1219	3.325	34.8612
3.33	157.518	3.33	36.6214	3.33	45.0848	3.33	31.4531	3.33	31.7563
3.335	155.345	3.335	35.4592	3.335	43.4286	3.335	32.7889	3.335	28.6243
3.34	157.052	3.34	36.1948	3.34	44.1322	3.34	32.5674	3.34	27.8563
3.345	155.818	3.345	36.6452	3.345	46.3038	3.345	33.5006	3.345	27.8083
3.35	155.065	3.35	33.3364	3.35	50.5699	3.35	33.6856	3.35	28.2388
3.355	156.526	3.355	32.9015	3.355	53.4289	3.355	32.9447	3.355	28.8163
3.36	158.189	3.36	32.3117	3.36	58.0686	3.36	33.5601	3.36	31.7388
3.365	156.693	3.365	31.604	3.365	60.5601	3.365	33.2658	3.365	33.6071
3.37	159.019	3.37	30.3855	3.37	58.646	3.37	34.7199	3.37	34.5552
3.375	160.402	3.375	28.9644	3.375	52.2828	3.375	33.5954	3.375	33.8817
3.38	160.08	3.38	28.2898	3.38	49.5155	3.38	31.8112	3.38	34.0975
3.385	157.993	3.385	28.1801	3.385	47.828	3.385	30.9107	3.385	31.6991
3.39	152.796	3.39	29.0976	3.39	49.091	3.39	28.2602	3.39	29.0998
3.395	143.613	3.395	29.9747	3.395	52.961	3.395	27.0877	3.395	25.2536
3.4	136.491	3.4	30.4731	3.4	58.384	3.4	25.9695	3.4	22.1869
3.405	132.861	3.405	31.0589	3.405	62.8811	3.405	26.5929	3.405	20.5679
3.41	136.498	3.41	31.9551	3.41	64.8996	3.41	25.4946	3.41	23.1458
3.415	142.496	3.415	32.4752	3.415	64.5175	3.415	25.4577	3.415	28.6111
3.42	148.591	3.42	33.0168	3.42	62.3655	3.42	23.918	3.42	33.8938
3.425	153.22	3.425	35.1257	3.425	60.3287	3.425	22.2808	3.425	35.5665
3.43	155.723	3.43	36.6632	3.43	57.9247	3.43	20.8003	3.43	35.778
3.435	155.642	3.435	38.3217	3.435	58.4797	3.435	19.6974	3.435	33.8174
3.44	155.815	3.44	39.6972	3.44	60.8923	3.44	21.3722	3.44	30.75
3.445	157.774	3.445	39.4876	3.445	61.1187	3.445	20.4	3.445	27.9175
3.45	159.553	3.45	38.3259	3.45	61.718	3.45	21.4568	3.45	27.4396
3.455	163.388	3.455	37.1213	3.455	61.7776	3.455	21.0892	3.455	26.9452
3.46	166.01	3.46	36.1664	3.46	62.1486	3.46	20.0828	3.46	31.4383
3.465	165.107	3.465	35.7723	3.465	61.8654	3.465	19.5137	3.465	33.7665
3.47	162.343	3.47	35.2841	3.47	62.1394	3.47	20.4515	3.47	37.0405
3.475	157.921	3.475	36.1485	3.475	62.6387	3.475	21.4909	3.475	37.4546
3.48	153.849	3.48	35.9106	3.48	61.7524	3.48	23.4332	3.48	36.847
3.485	151.801	3.485	36.1398	3.485	61.262	3.485	25.2697	3.485	34.9684
3.49	149.421	3.49	35.107	3.49	60.9188	3.49	24.925	3.49	33.5686
3.495	148.089	3.495	35.3803	3.495	61.0767	3.495	25.2846	3.495	32.8264
3.5	143.858	3.5	34.5263	3.5	60.9285	3.5	24.392	3.5	32.481
3.505	142.097	3.505	33.462	3.505	60.6297	3.505	22.9263	3.505	33.9033
3.51	140.48	3.51	32.4823	3.51	61.9976	3.51	21.3835	3.51	34.7676
3.515	141.422	3.515	31.9588	3.515	63.3504	3.515	21.2651	3.515	36.8676
3.52	142.899	3.52	32.608	3.52	63.8426	3.52	21.5868	3.52	36.4759
3.525	149.154	3.525	32.9118	3.525	61.0251	3.525	21.4998	3.525	34.3446
3.53	154.12	3.53	33.9575	3.53	60.1288	3.53	22.1314	3.53	33.5112
3.535	158.557	3.535	36.9469	3.535	59.6028	3.535	22.0084	3.535	31.4453
3.54	162.146	3.54	37.9582	3.54	59.1767	3.54	22.8595	3.54	29.7774
3.545	164.203	3.545	38.3942	3.545	58.0043	3.545	22.524	3.545	29.4441
3.55	166.031	3.55	38.0459	3.55	58.1142	3.55	25.0503	3.55	30.8068
3.555	167.259	3.555	38.4515	3.555	59.867	3.555	25.3636	3.555	31.121
3.56	167.297	3.56	38.5504	3.56	62.9605	3.56	25.0044	3.56	32.5949
3.565	165.334	3.565	38.2459	3.565	63.3876	3.565	25.108	3.565	34.158
3.57	162.018	3.57	38.1061	3.57	64.6063	3.57	25.6716	3.57	34.1523
3.575	158.883	3.575	36.938	3.575	63.5741	3.575	25.4373	3.575	32.1815
3.58	156.6	3.58	36.2044	3.58	63.0583	3.58	25.1143	3.58	31.4445
3.585	154.157	3.585	33.768	3.585	62.9688	3.585	26.0714	3.585	31.7515
3.59	149.119	3.59	33.326	3.59	62.4573	3.59	25.3183	3.59	30.2476
3.595	148.174	3.595	32.5984	3.595	60.5827	3.595	23.758	3.595	27.3357
3.6	147.041	3.6	31.4442	3.6	60.8036	3.6	22.125	3.6	23.525
3.605	145.061	3.605	32.554	3.605	61.1182	3.605	20.1181	3.605	22.25
3.61	142.115	3.61	33.6131	3.61	60.2485	3.61	19.8078	3.61	22.1384
3.615	140.726	3.615	34.955	3.615	58.4323	3.615	18.6226	3.615	25.9169
3.62	138.385	3.62	35.5011	3.62	55.4799	3.62	20.8408	3.62	27.7345
3.625	137.011	3.625	35.6051	3.625	54.4589	3.625	22.854	3.625	28.1913
3.63	143.668	3.63	38.1011	3.63	56.3586	3.63	23.7253	3.63	28.3097
3.635	149.589	3.635	38.074	3.635	56.6056	3.635	23.9748	3.635	29.8599
3.64	154.325	3.64	37.3699	3.64	59.3746	3.64	22.6863	3.64	29.8052
3.645	157.557	3.645	36.5835	3.645	62.0921	3.645	20.6812	3.645	26.4854
3.65	155.357	3.65	37.7317	3.65	65.4739	3.65	20.5304	3.65	25.5989
3.655	153.148	3.655	34.9332	3.655	67.0358	3.655	19.944	3.655	23.9134
3.66	148.21	3.66	36.1785	3.66	65.924	3.66	21.1713	3.66	24.7903
3.665	145.03	3.665	37.3804	3.665	64.0658	3.665	22.2071	3.665	26.4131
3.67	146.194	3.67	36.6305	3.67	61.9967	3.67	23.8998	3.67	27.5382
3.675	151.683	3.675	37.0978	3.675	60.4973	3.675	25.989	3.675	28.9383
3.68	159.982	3.68	36.4499	3.68	58.9057	3.68	26.0343	3.68	28.3887
3.685	171.74	3.685	36.37	3.685	60.1066	3.685	23.9299	3.685	30.4118
3.69	173.934	3.69	34.7829	3.69	59.9857	3.69	23.6891	3.69	31.466
3.695	170.77	3.695	33.1562	3.695	61.4575	3.695	23.7644	3.695	32.1126
3.7	168.163	3.7	33.733	3.7	62.7956	3.7	23.01	3.7	33.0457
3.705	164.326	3.705	34.7586	3.705	61.4619	3.705	24.4295	3.705	32.8964
3.71	160.423	3.71	37.2888	3.71	61.7592	3.71	25.9209	3.71	32.4452
3.715	161.029	3.715	39.007	3.715	62.2315	3.715	26.4441	3.715	31.2664
3.72	162.531	3.72	40.28	3.72	63.3319	3.72	28.2004	3.72	31.2988
3.725	167.416	3.725	39.4179	3.725	64.187	3.725	29.3838	3.725	30.1588
3.73	168.797	3.73	40.2193	3.73	64.8748	3.73	30.1847	3.73	29.7389
3.735	167.709	3.735	40.0512	3.735	64.8671	3.735	28.574	3.735	29.9218
3.74	163.433	3.74	38.6119	3.74	64.1237	3.74	28.5007	3.74	30.2434
3.745	158.644	3.745	38.1497	3.745	62.7621	3.745	30.0401	3.745	32.0445
3.75	157.161	3.75	35.7732	3.75	60.0892	3.75	29.4856	3.75	33.1625
3.755	154.234	3.755	35.3473	3.755	58.5751	3.755	30.2476	3.755	34.2953
3.76	149.875	3.76	33.5182	3.76	59.4674	3.76	31.1117	3.76	35.9122
3.765	149.999	3.765	31.9405	3.765	60.4451	3.765	30.2265	3.765	34.8271
3.77	153.509	3.77	30.8937	3.77	62.1189	3.77	27.4088	3.77	34.0249
3.775	158.039	3.775	29.7416	3.775	63.2724	3.775	26.3307	3.775	32.5
3.78	161.872	3.78	30.1681	3.78	64.998	3.78	25.7353	3.78	31.2661
3.785	163.959	3.785	31.5576	3.785	65.3366	3.785	21.767	3.785	30.3349
3.79	165.407	3.79	33.474	3.79	64.3844	3.79	20.1463	3.79	30.3297
3.795	167.399	3.795	35.3435	3.795	61.1856	3.795	20.438	3.795	31.129
3.8	166.432	3.8	36.7894	3.8	59.4777	3.8	21.4347	3.8	31.2356
3.805	162.975	3.805	36.169	3.805	58.2332	3.805	21.4893	3.805	32.1072
3.81	158.626	3.81	35.0049	3.81	57.5825	3.81	23.6093	3.81	33.0298
3.815	157.2	3.815	35.6382	3.815	56.9022	3.815	25.6634	3.815	33.7581
3.82	164.971	3.82	35.2737	3.82	57.4879	3.82	24.8806	3.82	32.855
3.825	168.041	3.825	35.4251	3.825	57.4167	3.825	24.9943	3.825	32.5474
3.83	170.564	3.83	34.5927	3.83	60.2026	3.83	25.5256	3.83	32.9882
3.835	172.526	3.835	33.6982	3.835	59.9582	3.835	25.3513	3.835	32.2312
3.84	176.837	3.84	36.0266	3.84	59.1018	3.84	24.2154	3.84	31.4143
3.845	177.988	3.845	39.05	3.845	58.7778	3.845	24.1257	3.845	33.1904
3.85	177.77	3.85	40.882	3.85	59.271	3.85	25.158	3.85	33.447
3.855	174.987	3.855	42.4302	3.855	61.2085	3.855	24.737	3.855	33.4354
3.86	173.094	3.86	43.3896	3.86	63.8711	3.86	25.7691	3.86	33.5445
3.865	171.378	3.865	43.5582	3.865	64.3166	3.865	27.727	3.865	32.7641
3.87	167.251	3.87	42.8736	3.87	66.055	3.87	29.3507	3.87	33.6529
3.875	162.786	3.875	41.267	3.875	66.2093	3.875	29.7136	3.875	32.9682
3.88	159.096	3.88	39.1676	3.88	65.4089	3.88	32.7235	3.88	32.9982
3.885	159.542	3.885	37.6943	3.885	63.1069	3.885	36.2657	3.885	33.065
3.89	162.85	3.89	37.3921	3.89	61.2291	3.89	38.793	3.89	34.3677
3.895	165.673	3.895	38.2464	3.895	59.3183	3.895	38.7069	3.895	38.6356
3.9	168.158	3.9	37.5954	3.9	60.494	3.9	38.9681	3.9	42.0102
3.905	170.647	3.905	37.2595	3.905	62.1331	3.905	38.2652	3.905	44.0835
3.91	172.349	3.91	38.8588	3.91	63.9888	3.91	36.1546	3.91	43.0132
3.915	172.711	3.915	40.0387	3.915	64.5876	3.915	32.6311	3.915	41.4945
3.92	169.07	3.92	39.8916	3.92	65.011	3.92	30.1788	3.92	39.798
3.925	165.976	3.925	38.9046	3.925	64.5091	3.925	29.0811	3.925	38.4109
3.93	168.038	3.93	38.5292	3.93	63.3746	3.93	28.4145	3.93	39.3232
3.935	169.889	3.935	39.1216	3.935	62.1248	3.935	29.0451	3.935	38.2286
3.94	168.069	3.94	37.3146	3.94	60.6893	3.94	30.7034	3.94	39.3078
3.945	165.666	3.945	35.8839	3.945	59.9559	3.945	31.1674	3.945	41.0007
3.95	160.648	3.95	33.3973	3.95	60.3217	3.95	30.6873	3.95	43.909
3.955	158.724	3.955	32.1082	3.955	61.3844	3.955	29.3795	3.955	43.8471
3.96	158.154	3.96	31.3915	3.96	61.9356	3.96	29.6747	3.96	42.1821
3.965	157.336	3.965	31.1818	3.965	61.4163	3.965	29.1508	3.965	40.6041
3.97	159.551	3.97	28.8398	3.97	61.2646	3.97	28.6366	3.97	39.8786
3.975	165.04	3.975	28.323	3.975	62.0256	3.975	28.6483	3.975	40.073
3.98	169.334	3.98	30.9634	3.98	62.5534	3.98	29.0895	3.98	40.3409
3.985	177.783	3.985	33.5296	3.985	62.3657	3.985	29.3652	3.985	41.0936
3.99	183.182	3.99	35.7854	3.99	63.3584	3.99	29.9912	3.99	42.1493
3.995	184.563	3.995	34.8922	3.995	63.1815	3.995	29.6417	3.995	43.5198
4	184.301	4	34.3578	4	63.7924	4	28.9347	4	46.0872
4.005	184.111	4.005	34.9987	4.005	63.4654	4.005	28.8084	4.005	46.3748
4.01	182.654	4.01	35.3416	4.01	63.5054	4.01	29.0086	4.01	45.9675
4.015	183.443	4.015	36.3039	4.015	63.4516	4.015	29.6367	4.015	44.936
4.02	179.224	4.02	35.9588	4.02	62.7368	4.02	30.0986	4.02	43.1313
4.025	173.813	4.025	37.0221	4.025	64.1874	4.025	28.8749	4.025	39.4289
4.03	170.466	4.03	37.5774	4.03	65.699	4.03	29.6403	4.03	35.3894
4.035	166.223	4.035	39.3209	4.035	65.1051	4.035	31.5008	4.035	33.4922
4.04	165.284	4.04	41.088	4.04	64.4368	4.04	33.0739	4.04	34.5499
4.045	165.184	4.045	41.1712	4.045	63.8455	4.045	34.558	4.045	35.0805
4.05	165.269	4.05	41.2218	4.05	62.5999	4.05	36.3162	4.05	36.1845
4.055	168.081	4.055	40.8689	4.055	60.6738	4.055	36.144	4.055	35.9118
4.06	175.779	4.06	41.4573	4.06	60.6667	4.06	35.0293	4.06	34.3311
4.065	176.959	4.065	39.4517	4.065	59.6679	4.065	32.3683	4.065	33.5961
4.07	175.137	4.07	37.3455	4.07	60.5101	4.07	29.6399	4.07	32.8002
4.075	171.886	4.075	35.6998	4.075	60.9182	4.075	29.1178	4.075	30.3953
4.08	168.443	4.08	34.621	4.08	61.2802	4.08	27.2436	4.08	30.0841
4.085	165.995	4.085	34.0763	4.085	60.893	4.085	28.9974	4.085	31.2653
4.09	160.992	4.09	32.9952	4.09	60.0392	4.09	32.2754	4.09	33.6913
4.095	158.838	4.095	33.1912	4.095	59.0755	4.095	35.5236	4.095	36.6667
4.1	158.626	4.1	32.6623	4.1	58.6169	4.1	37.9505	4.1	38.3579
4.105	155.32	4.105	33.1424	4.105	59.1901	4.105	36.5767	4.105	40.3682
4.11	155.26	4.11	35.7253	4.11	58.724	4.11	35.0791	4.11	40.991
4.115	154.7	4.115	38.223	4.115	57.3797	4.115	33.974	4.115	39.4631
4.12	154.196	4.12	37.6316	4.12	59.1485	4.12	31.0805	4.12	38.3989
4.125	155.04	4.125	35.2034	4.125	61.8735	4.125	28.1367	4.125	38.9363
4.13	160.587	4.13	34.5542	4.13	63.8434	4.13	26.5788	4.13	39.8088
4.135	165.787	4.135	34.454	4.135	63.1604	4.135	27.0471	4.135	39.916
4.14	169.262	4.14	34.0965	4.14	63.2887	4.14	29.0752	4.14	40.742
4.145	171.974	4.145	35.7393	4.145	64.3133	4.145	32.8587	4.145	41.1161
4.15	175.118	4.15	37.1836	4.15	62.686	4.15	34.4104	4.15	42.4875
4.155	177.249	4.155	37.707	4.155	61.1301	4.155	34.9057	4.155	42.9727
4.16	175.233	4.16	37.9807	4.16	61.3223	4.16	34.4105	4.16	42.9124
4.165	177.712	4.165	38.1866	4.165	60.5758	4.165	34.1066	4.165	42.4487
4.17	178.908	4.17	37.743	4.17	60.4315	4.17	34.5091	4.17	41.253
4.175	176.83	4.175	34.6921	4.175	61.9247	4.175	31.6755	4.175	41.9354
4.18	178.925	4.18	33.9196	4.18	62.0469	4.18	30.853	4.18	41.363
4.185	178.742	4.185	37.7146	4.185	58.8206	4.185	31.9857	4.185	40.8309
4.19	178.067	4.19	38.9139	4.19	58.1443	4.19	30.6043	4.19	38.1556
4.195	178.001	4.195	37.1875	4.195	58.8173	4.195	30.0486	4.195	37.8432
4.2	177.333	4.2	34.1554	4.2	59.399	4.2	30.0044	4.2	40.0613
4.205	176.208	4.205	32.3882	4.205	60.2769	4.205	30.242	4.205	41.7862
4.21	173.87	4.21	30.409	4.21	61.186	4.21	30.8619	4.21	42.7542
4.215	175.034	4.215	32.5025	4.215	61.8939	4.215	32.806	4.215	42.2602
4.22	176.225	4.22	33.7406	4.22	60.8233	4.22	36.1249	4.22	43.7158
4.225	178.545	4.225	34.4005	4.225	60.2304	4.225	37.2227	4.225	43.2147
4.23	176.182	4.23	34.8266	4.23	60.7224	4.23	37.863	4.23	40.6558
4.235	176.711	4.235	35.6847	4.235	61.6424	4.235	37.0628	4.235	37.0729
4.24	174.636	4.24	37.4366	4.24	62.9405	4.24	36.2876	4.24	33.9824
4.245	170.138	4.245	36.6329	4.245	64.1769	4.245	34.359	4.245	33.6623
4.25	169.653	4.25	34.604	4.25	67.2747	4.25	33.3999	4.25	34.8109
4.255	168.814	4.255	36.5146	4.255	66.0988	4.255	33.0319	4.255	37.4265
4.26	167.327	4.26	38.8359	4.26	64.7755	4.26	32.9582	4.26	40.737
4.265	166.268	4.265	41.4318	4.265	63.0278	4.265	32.8879	4.265	42.2977
4.27	168.376	4.27	40.8596	4.27	62.8011	4.27	34.5118	4.27	44.0047
4.275	169.053	4.275	39.718	4.275	63.6287	4.275	34.9084	4.275	43.5988
4.28	169.086	4.28	37.846	4.28	64.5088	4.28	33.6159	4.28	42.1519
4.285	170.777	4.285	37.3961	4.285	63.9658	4.285	31.5621	4.285	39.4642
4.29	174.196	4.29	36.6055	4.29	61.6608	4.29	29.9072	4.29	38.4027
4.295	179.847	4.295	37.6346	4.295	60.8624	4.295	29.5784	4.295	40.6922
4.3	184.917	4.3	38.1144	4.3	59.1712	4.3	31.2961	4.3	42.5989
4.305	188.107	4.305	38.2653	4.305	58.2675	4.305	33.2426	4.305	43.419
4.31	190.467	4.31	38.1786	4.31	56.5096	4.31	33.8286	4.31	44.7875
4.315	188.308	4.315	37.4585	4.315	56.7386	4.315	35.26	4.315	45.7225
4.32	186.269	4.32	36.5691	4.32	62.2512	4.32	35.1755	4.32	44.7832
4.325	187.158	4.325	37.6278	4.325	65.2707	4.325	34.1571	4.325	43.69
4.33	182.661	4.33	38.6176	4.33	66.0261	4.33	33.1283	4.33	42.0455
4.335	175.981	4.335	39.8474	4.335	66.2746	4.335	32.0554	4.335	39.8326
4.34	170.727	4.34	38.9642	4.34	64.7471	4.34	32.5543	4.34	39.4973
4.345	164.879	4.345	38.2474	4.345	61.5118	4.345	33.3735	4.345	38.4713
4.35	162.112	4.35	36.8443	4.35	60.7187	4.35	35.2277	4.35	39.3833
4.355	159.394	4.355	34.9299	4.355	59.8	4.355	37.2398	4.355	40.6522
4.36	159.845	4.36	32.8577	4.36	57.3653	4.36	38.3429	4.36	38.6073
4.365	163.228	4.365	32.8341	4.365	57.6589	4.365	37.9424	4.365	38.3486
4.37	168.304	4.37	33.8335	4.37	59.1842	4.37	35.7274	4.37	37.2038
4.375	170.687	4.375	34.0559	4.375	59.5897	4.375	32.1237	4.375	35.2806
4.38	170.342	4.38	34.487	4.38	58.0453	4.38	28.5144	4.38	35.5561
4.385	166.947	4.385	32.7248	4.385	55.4474	4.385	27.0148	4.385	37.8601
4.39	163.193	4.39	31.3041	4.39	54.4835	4.39	26.4194	4.39	39.2406
4.395	162.97	4.395	31.5983	4.395	54.58	4.395	27.6151	4.395	40.9595
4.4	163.051	4.4	31.1776	4.4	55.7081	4.4	30.2023	4.4	40.0199
4.405	165.521	4.405	31.9162	4.405	58.4001	4.405	33.6249	4.405	40.0513
4.41	168.431	4.41	33.8891	4.41	59.1395	4.41	35.7629	4.41	39.5829
4.415	167.225	4.415	35.9559	4.415	58.9818	4.415	35.5359	4.415	38.3818
4.42	166.128	4.42	37.7935	4.42	60.7103	4.42	34.3828	4.42	38.5825
4.425	161.7	4.425	39.2408	4.425	63.3468	4.425	32.12	4.425	40.0171
4.43	154.781	4.43	40.8183	4.43	63.0336	4.43	32.9997	4.43	40.6682
4.435	150.291	4.435	40.8968	4.435	62.5887	4.435	34.2781	4.435	42.9161
4.44	147.884	4.44	40.9315	4.44	64.109	4.44	34.616	4.44	41.8319
4.445	149.375	4.445	39.8636	4.445	64.6193	4.445	34.8995	4.445	40.4342
4.45	154.127	4.45	39.0925	4.45	67.3574	4.45	35.7734	4.45	38.7774
4.455	161.913	4.455	37.7527	4.455	69.881	4.455	35.5286	4.455	38.0194
4.46	166.224	4.46	37.1208	4.46	69.5309	4.46	35.1811	4.46	39.0684
4.465	167.146	4.465	36.6047	4.465	68.5828	4.465	35.1853	4.465	37.9172
4.47	165.584	4.47	34.5059	4.47	66.7103	4.47	35.9331	4.47	37.2403
4.475	163.072	4.475	32.7819	4.475	64.9495	4.475	37.6747	4.475	36.2264
4.48	158.178	4.48	32.0399	4.48	61.423	4.48	38.8953	4.48	35.7781
4.485	153.107	4.485	31.107	4.485	57.2498	4.485	39.2468	4.485	36.3687
4.49	151.232	4.49	30.6442	4.49	56.2381	4.49	39.6694	4.49	36.5869
4.495	150.362	4.495	30.5033	4.495	58.7608	4.495	38.3251	4.495	36.5273
4.5	151.178	4.5	31.2747	4.5	61.0425	4.5	38.1281	4.5	35.7783
4.505	154.84	4.505	32.1526	4.505	63.4716	4.505	38.5296	4.505	37.4012
4.51	156.755	4.51	32.3802	4.51	65.0408	4.51	38.7653	4.51	38.0343
4.515	158.243	4.515	33.3178	4.515	63.4154	4.515	38.5354	4.515	38.3814
4.52	157.021	4.52	32.3548	4.52	61.3768	4.52	37.3787	4.52	37.3975
4.525	156.74	4.525	31.1689	4.525	59.9728	4.525	35.6333	4.525	36.8131
4.53	158.77	4.53	32.0391	4.53	57.4487	4.53	34.3443	4.53	38.44
4.535	164.273	4.535	31.7825	4.535	55.8145	4.535	34.1204	4.535	39.0901
4.54	169.346	4.54	33.0516	4.54	55.0041	4.54	32.9607	4.54	42.8347
4.545	175.158	4.545	33.3423	4.545	55.871	4.545	32.3115	4.545	42.4423
4.55	174.79	4.55	34.2815	4.55	58.6729	4.55	32.6973	4.55	40.9848
4.555	172.4	4.555	36.2926	4.555	59.1143	4.555	31.8109	4.555	39.7813
4.56	169.686	4.56	38.2133	4.56	60.097	4.56	32.4448	4.56	38.6986
4.565	164.106	4.565	39.089	4.565	61.5924	4.565	32.2758	4.565	38.2985
4.57	160.836	4.57	38.3681	4.57	60.1526	4.57	31.2007	4.57	36.7487
4.575	159.411	4.575	38.676	4.575	59.13	4.575	31.1405	4.575	35.9849
4.58	159.886	4.58	37.5509	4.58	57.9053	4.58	31.0899	4.58	36.515
4.585	164.566	4.585	37.4014	4.585	58.0017	4.585	30.099	4.585	38.1119
4.59	169.652	4.59	37.7127	4.59	58.4201	4.59	29.2118	4.59	37.8633
4.595	170.303	4.595	38.518	4.595	58.6539	4.595	27.7881	4.595	38.4968
4.6	170.241	4.6	38.9796	4.6	58.0823	4.6	28.4767	4.6	37.916
4.605	171.283	4.605	38.5712	4.605	58.8811	4.605	30.3528	4.605	36.1159
4.61	171.113	4.61	38.7508	4.61	58.961	4.61	32.7862	4.61	36.6538
4.615	176.14	4.615	37.504	4.615	58.8118	4.615	35.0271	4.615	36.8781
4.62	176.899	4.62	37.0003	4.62	59.949	4.62	38.9018	4.62	36.0835
4.625	174.916	4.625	36.5076	4.625	59.7867	4.625	39.4029	4.625	36.2225
4.63	176.097	4.63	35.8115	4.63	60.2036	4.63	40.3619	4.63	36.7617
4.635	177.666	4.635	36.4632	4.635	61.5822	4.635	39.6485	4.635	38.7644
4.64	178.789	4.64	37.4724	4.64	60.6571	4.64	37.9081	4.64	39.2128
4.645	180.489	4.645	37.4195	4.645	60.9764	4.645	36.5034	4.645	40.9632
4.65	179.87	4.65	37.2708	4.65	60.147	4.65	35.646	4.65	40.0603
4.655	176.507	4.655	36.2869	4.655	62.343	4.655	35.7898	4.655	38.7894
4.66	174.261	4.66	36.3528	4.66	63.9135	4.66	36.5186	4.66	36.6937
4.665	171.231	4.665	36.9672	4.665	64.5225	4.665	37.2722	4.665	36.2829
4.67	169.617	4.67	36.382	4.67	63.4674	4.67	38.8843	4.67	36.4757
4.675	168.853	4.675	35.2698	4.675	61.3688	4.675	39.4481	4.675	37.1691
4.68	167.953	4.68	35.2335	4.68	59.2097	4.68	39.1296	4.68	38.4107
4.685	171.25	4.685	33.8341	4.685	58.8054	4.685	36.293	4.685	40.7574
4.69	174.98	4.69	32.9701	4.69	57.3094	4.69	34.7449	4.69	41.996
4.695	176.395	4.695	32.3114	4.695	57.6634	4.695	31.8257	4.695	42.0557
4.7	177.483	4.7	31.8092	4.7	59.609	4.7	31.5622	4.7	41.2148
4.705	175.28	4.705	33.7168	4.705	62.1927	4.705	32.8404	4.705	40.601
4.71	172.383	4.71	35.1076	4.71	65.0491	4.71	34.993	4.71	38.952
4.715	169.737	4.715	34.3586	4.715	65.3424	4.715	34.9008	4.715	39.3954
4.72	166.782	4.72	33.2195	4.72	62.2738	4.72	34.3205	4.72	40.3703
4.725	163.501	4.725	31.8094	4.725	60.3312	4.725	33.903	4.725	40.6778
4.73	164.664	4.73	31.2957	4.73	57.0985	4.73	32.4171	4.73	41.7183
4.735	164.848	4.735	31.4914	4.735	56.4342	4.735	30.2016	4.735	41.3836
4.74	168.826	4.74	33.0563	4.74	56.4965	4.74	29.2381	4.74	41.9564
4.745	172.576	4.745	34.7619	4.745	56.3253	4.745	29.0067	4.745	41.2745
4.75	174.105	4.75	37.307	4.75	57.902	4.75	30.4578	4.75	41.1466
4.755	172.723	4.755	38.0256	4.755	62.1675	4.755	31.8132	4.755	41.0964
4.76	171.427	4.76	37.8142	4.76	62.8001	4.76	32.7565	4.76	43.0202
4.765	169.96	4.765	38.2851	4.765	63.6675	4.765	32.9867	4.765	43.6804
4.77	167.129	4.77	37.2621	4.77	61.5756	4.77	34.0301	4.77	44.2175
4.775	166.111	4.775	34.9068	4.775	59.7057	4.775	34.1072	4.775	44.6686
4.78	165.058	4.78	33.9778	4.78	60.9159	4.78	35.474	4.78	44.6589
4.785	164.456	4.785	31.5741	4.785	60.3033	4.785	35.4062	4.785	44.0814
4.79	162.54	4.79	30.5244	4.79	60.8349	4.79	36.4555	4.79	44.3962
4.795	160.668	4.795	28.8588	4.795	62.3662	4.795	37.2079	4.795	44.3701
4.8	160.337	4.8	29.5767	4.8	59.4436	4.8	36.2423	4.8	44.8096
4.805	162.818	4.805	31.2542	4.805	57.6273	4.805	34.9687	4.805	43.8892
4.81	166.464	4.81	32.7958	4.81	55.4184	4.81	34.0455	4.81	42.7811
4.815	169.324	4.815	35.2064	4.815	53.0846	4.815	32.7569	4.815	42.0948
4.82	165.697	4.82	35.6778	4.82	51.2583	4.82	32.6777	4.82	42.4992
4.825	159.519	4.825	34.0851	4.825	50.576	4.825	32.2226	4.825	40.7951
4.83	152.113	4.83	32.5126	4.83	52.2273	4.83	33.2252	4.83	41.179
4.835	143.383	4.835	32.8194	4.835	54.9	4.835	34.1709	4.835	40.7892
4.84	133.183	4.84	34.389	4.84	56.5854	4.84	36.4011	4.84	40.8036
4.845	129.421	4.845	33.4977	4.845	58.3709	4.845	38.4976	4.845	41.0259
4.85	127.927	4.85	35.5793	4.85	58.2088	4.85	38.8259	4.85	41.7643
4.855	129.756	4.855	35.7344	4.855	56.1361	4.855	38.2402	4.855	41.4569
4.86	135.447	4.86	35.355	4.86	54.8861	4.86	38.8706	4.86	41.6194
4.865	144.75	4.865	32.3981	4.865	56.0837	4.865	39.055	4.865	40.8705
4.87	152.205	4.87	31.0982	4.87	55.2244	4.87	38.1884	4.87	40.483
4.875	157.951	4.875	30.852	4.875	56.4844	4.875	39.2278	4.875	39.4436
4.88	164.016	4.88	31.817	4.88	58.5456	4.88	40.3541	4.88	37.9156
4.885	170.494	4.885	32.9112	4.885	58.7972	4.885	43.5948	4.885	36.3109
4.89	171.58	4.89	33.3248	4.89	59.1649	4.89	45.2381	4.89	36.4611
4.895	169.264	4.895	33.0166	4.895	55.6141	4.895	44.4307	4.895	36.6994
4.9	167.76	4.9	32.9378	4.9	54.8826	4.9	44.1759	4.9	38.3528
4.905	165.215	4.905	32.0269	4.905	53.1578	4.905	43.2482	4.905	40.3122
4.91	162.813	4.91	33.752	4.91	53.0733	4.91	41.5099	4.91	43.0223
4.915	162.723	4.915	33.3267	4.915	53.5185	4.915	40.6748	4.915	45.5146
4.92	165.035	4.92	34.8759	4.92	54.9457	4.92	40.473	4.92	48.4713
4.925	165.138	4.925	36.076	4.925	56.5361	4.925	41.1236	4.925	48.2049
4.93	165.746	4.93	37.7834	4.93	56.6434	4.93	41.0082	4.93	48.0068
4.935	166.87	4.935	38.6073	4.935	57.2519	4.935	41.1132	4.935	45.9709
4.94	171.17	4.94	38.2774	4.94	55.9145	4.94	41.8545	4.94	44.0514
4.945	170.925	4.945	35.9315	4.945	54.1508	4.945	42.3497	4.945	41.4736
4.95	167.581	4.95	36.3878	4.95	53.9552	4.95	42.918	4.95	39.9785
4.955	163.579	4.955	36.9595	4.955	52.9621	4.955	46.0321	4.955	40.3039
4.96	158.783	4.96	35.4589	4.96	51.9174	4.96	46.9712	4.96	43.273
4.965	155.939	4.965	36.6522	4.965	51.0629	4.965	47.4358	4.965	45.6264
4.97	155.446	4.97	37.0822	4.97	53.6764	4.97	47.9107	4.97	47.8609
4.975	153.473	4.975	36.8836	4.975	56.2988	4.975	48.6786	4.975	48.3677
4.98	155.421	4.98	36.1036	4.98	59.0531	4.98	46.9404	4.98	47.4315
4.985	159.942	4.985	32.891	4.985	60.9982	4.985	44.0466	4.985	47.3047
4.99	165.729	4.99	32.0987	4.99	63.3998	4.99	43.2757	4.99	45.5709
4.995	171.038	4.995	29.7963	4.995	61.4778	4.995	43.544	4.995	43.2737
5	175.177	5	29.2035	5	58.3948	5	40.9109	5	41.5385
5.005	173.252	5.005	30.3749	5.005	55.5028	5.005	39.5193	5.005	42.2442
5.01	171.646	5.01	32.3518	5.01	54.0746	5.01	39.9942	5.01	43.859
5.015	170.805	5.015	33.1682	5.015	52.442	5.015	39.6362	5.015	46.0242
5.02	170.09	5.02	33.7051	5.02	53.5473	5.02	41.7753	5.02	46.142
5.025	171.945	5.025	33.5836	5.025	55.8038	5.025	44.82	5.025	47.3695
5.03	172.858	5.03	30.8293	5.03	56.4001	5.03	46.8721	5.03	47.0895
5.035	175.791	5.035	32.0723	5.035	56.8491	5.035	47.3101	5.035	45.6436
5.04	179.237	5.04	30.9886	5.04	57.4141	5.04	47.0366	5.04	44.7319
5.045	178.56	5.045	31.336	5.045	56.9045	5.045	46.2655	5.045	45.1917
5.05	177.429	5.05	31.3158	5.05	55.3048	5.05	45.4122	5.05	43.6746
5.055	171.66	5.055	30.7711	5.055	56.3577	5.055	44.4493	5.055	44.7357
5.06	165.257	5.06	31.2195	5.06	59.1789	5.06	43.9087	5.06	44.2394
5.065	161.916	5.065	31.258	5.065	59.5404	5.065	44.0951	5.065	44.6052
5.07	164.017	5.07	31.6604	5.07	62.5346	5.07	41.8932	5.07	43.5057
5.075	166.273	5.075	32.5642	5.075	63.0208	5.075	40.7227	5.075	43.6619
5.08	168.75	5.08	34.807	5.08	62.2305	5.08	39.9643	5.08	42.1178
5.085	171.563	5.085	37.4488	5.085	60.7173	5.085	37.4604	5.085	41.4627
5.09	174.296	5.09	38.6338	5.09	57.8103	5.09	35.8958	5.09	41.707
5.095	178.163	5.095	38.3759	5.095	55.7619	5.095	34.5374	5.095	41.0328
5.1	181.261	5.1	36.5416	5.1	52.7873	5.1	34.5347	5.1	40.6533
5.105	178.634	5.105	37.5115	5.105	52.1581	5.105	36.944	5.105	40.8375
5.11	176.837	5.11	37.0971	5.11	52.3963	5.11	37.471	5.11	40.1068
5.115	172.302	5.115	36.3707	5.115	54.2702	5.115	38.3692	5.115	41.9335
5.12	170.291	5.12	36.5164	5.12	56.2223	5.12	39.8613	5.12	42.2591
5.125	165.062	5.125	38.186	5.125	58.6856	5.125	41.4028	5.125	43.4548
5.13	162.134	5.13	38.1612	5.13	59.526	5.13	42.1503	5.13	44.2265
5.135	157.964	5.135	37.3358	5.135	57.7147	5.135	43.2862	5.135	44.2728
5.14	156.743	5.14	34.4701	5.14	58.2691	5.14	41.5262	5.14	44.0525
5.145	155.48	5.145	32.1282	5.145	59.0562	5.145	41.2663	5.145	43.5988
5.15	153.529	5.15	29.734	5.15	59.3463	5.15	41.5092	5.15	41.1834
5.155	156.094	5.155	29.7008	5.155	62.4588	5.155	43.8062	5.155	40.2688
5.16	157.78	5.16	31.5442	5.16	64.5934	5.16	45.0514	5.16	41.1268
5.165	162.764	5.165	34.4823	5.165	67.3493	5.165	46.1752	5.165	38.7866
5.17	172.388	5.17	33.9507	5.17	68.1326	5.17	46.2126	5.17	38.9119
5.175	181.163	5.175	34.3858	5.175	66.8637	5.175	47.5225	5.175	41.0856
5.18	189.947	5.18	35.1609	5.18	62.3226	5.18	45.8255	5.18	40.9729
5.185	192.62	5.185	34.3286	5.185	57.5685	5.185	45.593	5.185	41.9049
5.19	195.446	5.19	33.7008	5.19	54.9267	5.19	45.4827	5.19	41.9322
5.195	192.894	5.195	33.326	5.195	54.3219	5.195	45.8272	5.195	42.3299
5.2	189.992	5.2	34.3648	5.2	54.2596	5.2	46.5175	5.2	43.081
5.205	186.814	5.205	37.3098	5.205	54.6091	5.205	49.108	5.205	44.6708
5.21	187.87	5.21	38.2251	5.21	55.9078	5.21	50.0966	5.21	46.1622
5.215	185.729	5.215	40.2392	5.215	58.4951	5.215	50.8971	5.215	46.1036
5.22	183.629	5.22	39.7232	5.22	58.7648	5.22	50.1446	5.22	46.5514
5.225	183.535	5.225	38.9348	5.225	59.5561	5.225	52.3788	5.225	46.6198
5.23	180.126	5.23	39.9564	5.23	59.623	5.23	52.7395	5.23	45.6886
5.235	177.436	5.235	40.9406	5.235	60.8119	5.235	52.8411	5.235	43.2987
5.24	175.036	5.24	39.7016	5.24	62.3457	5.24	52.3888	5.24	43.141
5.245	174.032	5.245	37.733	5.245	62.2839	5.245	51.0874	5.245	44.5151
5.25	173.389	5.25	37.4604	5.25	61.1181	5.25	51.243	5.25	43.4119
5.255	170.989	5.255	35.3315	5.255	59.962	5.255	51.612	5.255	46.1778
5.26	171.989	5.26	34.5472	5.26	60.0155	5.26	48.9724	5.26	46.6072
5.265	170.592	5.265	34.2677	5.265	58.3322	5.265	45.1344	5.265	45.9479
5.27	167.9	5.27	35.0949	5.27	57.1854	5.27	42.1535	5.27	43.863
5.275	165.939	5.275	36.4717	5.275	56.8715	5.275	41.5084	5.275	42.5434
5.28	168.948	5.28	35.6853	5.28	55.995	5.28	42.3713	5.28	41.9624
5.285	167.337	5.285	35.3928	5.285	57.138	5.285	45.5068	5.285	40.2445
5.29	166.621	5.29	34.3679	5.29	58.9891	5.29	47.5136	5.29	41.5509
5.295	168.613	5.295	34.0567	5.295	60.0048	5.295	48.5341	5.295	43.0378
5.3	169.712	5.3	35.9831	5.3	61.4278	5.3	47.4681	5.3	42.8518
5.305	169.365	5.305	37.4614	5.305	63.07	5.305	46.7636	5.305	42.9771
5.31	167.545	5.31	39.6815	5.31	62.909	5.31	45.105	5.31	44.0239
5.315	169.174	5.315	40.1524	5.315	62.8091	5.315	41.5051	5.315	43.7597
5.32	170.798	5.32	40.0837	5.32	62.3381	5.32	42.0237	5.32	40.9371
5.325	173.959	5.325	38.4809	5.325	61.0716	5.325	46.1997	5.325	42.4078
5.33	177.167	5.33	35.4008	5.33	60.709	5.33	50.2659	5.33	43.2304
5.335	178.824	5.335	32.3154	5.335	59.4435	5.335	52.1776	5.335	44.7656
5.34	178.839	5.34	30.7609	5.34	58.4653	5.34	53.3825	5.34	43.8811
5.345	178.229	5.345	31.0742	5.345	59.4259	5.345	51.4084	5.345	43.6063
5.35	178.593	5.35	32.4456	5.35	60.116	5.35	48.093	5.35	44.4205
5.355	174.727	5.355	34.095	5.355	59.0985	5.355	46.1549	5.355	44.7649
5.36	169.967	5.36	35.2446	5.36	58.1166	5.36	45.9313	5.36	46.1704
5.365	168.126	5.365	35.868	5.365	57.7849	5.365	46.2009	5.365	45.7186
5.37	167.446	5.37	36.0666	5.37	59.1512	5.37	47.0101	5.37	44.3892
5.375	166.066	5.375	36.0699	5.375	61.0137	5.375	49.1158	5.375	44.1064
5.38	162.703	5.38	37.7423	5.38	61.4516	5.38	52.2474	5.38	44.6461
5.385	163.111	5.385	36.9758	5.385	62.5984	5.385	55.3406	5.385	43.5009
5.39	164.031	5.39	34.8395	5.39	62.7629	5.39	56.0557	5.39	43.0966
5.395	169.027	5.395	34.688	5.395	62.1906	5.395	55.2676	5.395	45.06
5.4	175.679	5.4	34.1061	5.4	61.7148	5.4	53.4164	5.4	46.8848
5.405	181.854	5.405	34.1531	5.405	60.836	5.405	50.5302	5.405	49.264
5.41	185.723	5.41	35.2627	5.41	57.9617	5.41	50.1558	5.41	48.4933
5.415	188.999	5.415	36.6574	5.415	58.1331	5.415	49.7371	5.415	47.5069
5.42	192.45	5.42	37.9334	5.42	60.0334	5.42	50.2489	5.42	45.7356
5.425	192.886	5.425	38.0246	5.425	61.064	5.425	51.7873	5.425	45.3132
5.43	191.622	5.43	38.5518	5.43	61.4823	5.43	54.1379	5.43	45.2742
5.435	188.549	5.435	38.3047	5.435	60.0622	5.435	56.091	5.435	45.4599
5.44	184.714	5.44	38.2239	5.44	57.8665	5.44	55.1291	5.44	45.386
5.445	181.024	5.445	37.2421	5.445	54.8471	5.445	52.7612	5.445	46.1855
5.45	177.254	5.45	38.2482	5.45	54.0783	5.45	49.4856	5.45	45.077
5.455	177.031	5.455	37.3201	5.455	56.0911	5.455	47.393	5.455	42.1106
5.46	177.773	5.46	35.5116	5.46	56.9268	5.46	46.0271	5.46	39.9731
5.465	182.137	5.465	34.0356	5.465	58.8516	5.465	46.3086	5.465	37.6548
5.47	186.09	5.47	32.0221	5.47	61.9737	5.47	46.4881	5.47	36.3174
5.475	188.646	5.475	30.898	5.475	64.7104	5.475	47.1097	5.475	37.946
5.48	186.191	5.48	30.2188	5.48	64.6609	5.48	49.0943	5.48	39.7287
5.485	184.35	5.485	29.9043	5.485	64.4636	5.485	51.874	5.485	41.8589
5.49	182.585	5.49	30.8112	5.49	63.4368	5.49	51.3089	5.49	42.6824
5.495	181.092	5.495	31.3746	5.495	61.7772	5.495	51.1768	5.495	43.3334
5.5	180.269	5.5	31.9841	5.5	61.1079	5.5	52.6079	5.5	41.0885
5.505	180.733	5.505	32.9079	5.505	58.2685	5.505	54.183	5.505	40.1871
5.51	183.759	5.51	35.2568	5.51	56.7637	5.51	54.5823	5.51	39.2647
5.515	185.618	5.515	37.173	5.515	55.4633	5.515	55.0944	5.515	39.368
5.52	185.039	5.52	38.9713	5.52	54.8199	5.52	56.8528	5.52	37.6489
5.525	188.165	5.525	40.5653	5.525	55.8841	5.525	59.0498	5.525	37.0885
5.53	192.954	5.53	39.5912	5.53	56.4712	5.53	59.7362	5.53	35.7038
5.535	199.591	5.535	37.7465	5.535	56.6004	5.535	58.6997	5.535	34.4992
5.54	201.843	5.54	37.3617	5.54	56.6983	5.54	55.7856	5.54	32.6423
5.545	199.063	5.545	38.1141	5.545	57.8906	5.545	51.4356	5.545	32.1308
5.55	183.722	5.55	38.7702	5.55	57.6509	5.55	46.6534	5.55	33.0877
5.555	168.958	5.555	39.7224	5.555	57.4877	5.555	45.3858	5.555	36.0106
5.56	159.615	5.56	41.5495	5.56	57.9769	5.56	43.0987	5.56	37.353
5.565	157.105	5.565	41.4882	5.565	58.9475	5.565	41.2657	5.565	39.5715
5.57	158.493	5.57	38.8264	5.57	60.1102	5.57	41.9592	5.57	40.4831
5.575	165.05	5.575	38.1729	5.575	58.0653	5.575	43.4495	5.575	43.394
5.58	177.135	5.58	36.9761	5.58	56.0122	5.58	46.1022	5.58	45.1494
5.585	189.467	5.585	35.5533	5.585	55.9523	5.585	46.8218	5.585	45.5965
5.59	194.929	5.59	34.0565	5.59	55.5766	5.59	47.4335	5.59	45.0861
5.595	194.766	5.595	34.2415	5.595	58.3445	5.595	49.9853	5.595	43.2951
5.6	191.207	5.6	34.3176	5.6	63.2431	5.6	52.5459	5.6	41.2176
5.605	188.228	5.605	34.2641	5.605	65.0791	5.605	53.6292	5.605	40.7781
5.61	187.111	5.61	34.0154	5.61	65.7804	5.61	53.9564	5.61	40.4949
5.615	190.351	5.615	35.3237	5.615	65.0172	5.615	53.3585	5.615	39.8957
5.62	192.812	5.62	35.8887	5.62	63.9987	5.62	50.5603	5.62	40.5993
5.625	193.772	5.625	37.9407	5.625	61.0106	5.625	48.5025	5.625	42.8246
5.63	194.926	5.63	40.0578	5.63	60.5219	5.63	47.4611	5.63	41.2655
5.635	196.845	5.635	42.2566	5.635	60.2353	5.635	46.5033	5.635	40.1938
5.64	196.518	5.64	40.9581	5.64	60.3613	5.64	46.5209	5.64	37.7505
5.645	197.939	5.645	40.0735	5.645	59.3244	5.645	46.9204	5.645	37.693
5.65	196.348	5.65	39.7161	5.65	59.2926	5.65	48.8721	5.65	38.0893
5.655	194.799	5.655	37.7751	5.655	59.5372	5.655	49.4894	5.655	38.7579
5.66	194.082	5.66	37.0236	5.66	57.5502	5.66	49.574	5.66	40.7
5.665	194.764	5.665	35.4174	5.665	55.4329	5.665	49.9131	5.665	41.6151
5.67	196.413	5.67	33.3601	5.67	55.7137	5.67	49.9888	5.67	42.0682
5.675	202.066	5.675	32.0162	5.675	54.3679	5.675	51.2997	5.675	42.1486
5.68	203.998	5.68	30.8138	5.68	54.0709	5.68	51.6486	5.68	42.0266
5.685	204.94	5.685	32.0272	5.685	52.9328	5.685	53.3223	5.685	41.4133
5.69	203.829	5.69	32.0517	5.69	56.0052	5.69	54.9674	5.69	40.5775
5.695	205.012	5.695	32.9393	5.695	58.2198	5.695	53.9584	5.695	41.0012
5.7	207.007	5.7	34.6037	5.7	61.3884	5.7	53.5427	5.7	40.343
5.705	207.241	5.705	38.5918	5.705	64.4567	5.705	52.2443	5.705	40.7784
5.71	209.494	5.71	41.7167	5.71	67.4511	5.71	51.1064	5.71	40.1556
5.715	218.22	5.715	42.5407	5.715	65.9206	5.715	49.4934	5.715	41.944
5.72	222.261	5.72	42.8397	5.72	64.0728	5.72	48.9329	5.72	43.9428
5.725	224.335	5.725	40.6872	5.725	62.6115	5.725	48.9276	5.725	45.0291
5.73	225.502	5.73	41.2714	5.73	63.0618	5.73	49.3241	5.73	45.7913
5.735	222.509	5.735	39.9899	5.735	61.0569	5.735	48.1279	5.735	45.9612
5.74	216.385	5.74	37.4562	5.74	59.8282	5.74	46.4719	5.74	45.9731
5.745	212.45	5.745	35.2711	5.745	58.5638	5.745	45.7938	5.745	45.7962
5.75	208.782	5.75	33.8522	5.75	57.279	5.75	44.1652	5.75	46.5339
5.755	207.562	5.755	35.0444	5.755	54.6232	5.755	43.5642	5.755	47.9126
5.76	206.453	5.76	35.713	5.76	54.1855	5.76	44.9907	5.76	49.0336
5.765	204.876	5.765	35.9693	5.765	54.9616	5.765	45.8837	5.765	49.4151
5.77	204.359	5.77	37.7361	5.77	55.187	5.77	47.3614	5.77	48.9922
5.775	200.121	5.775	39.1783	5.775	55.8849	5.775	47.1983	5.775	47.401
5.78	194.655	5.78	38.7605	5.78	58.3374	5.78	46.4103	5.78	44.0001
5.785	194.639	5.785	38.5116	5.785	58.7961	5.785	45.7978	5.785	42.0641
5.79	194.794	5.79	36.0985	5.79	59.4713	5.79	45.5431	5.79	40.245
5.795	196.36	5.795	34.9225	5.795	58.15	5.795	45.8474	5.795	41.3246
5.8	200.977	5.8	37.2532	5.8	59.1425	5.8	49.3039	5.8	43.1569
5.805	204.864	5.805	40.0096	5.805	57.7113	5.805	51.1905	5.805	46.5503
5.81	206.786	5.81	42.4379	5.81	57.7812	5.81	51.734	5.81	49.9802
5.815	209.757	5.815	44.4412	5.815	55.8955	5.815	52.3405	5.815	49.4377
5.82	207.922	5.82	44.4444	5.82	55.7117	5.82	50.0269	5.82	49.7262
5.825	204.318	5.825	44.1179	5.825	55.4852	5.825	46.1144	5.825	49.0403
5.83	201.649	5.83	42.4136	5.83	55.3599	5.83	42.9503	5.83	49.1231
5.835	198.709	5.835	39.3611	5.835	54.9243	5.835	42.4184	5.835	49.5163
5.84	198.41	5.84	38.3778	5.84	55.8932	5.84	43.2897	5.84	50.6507
5.845	197.695	5.845	39.554	5.845	57.2128	5.845	44.8474	5.845	50.4553
5.85	196.473	5.85	40.6462	5.85	58.1996	5.85	45.9231	5.85	50.2334
5.855	198.706	5.855	43.621	5.855	59.1796	5.855	46.7169	5.855	49.2126
5.86	201.649	5.86	44.5266	5.86	60.1026	5.86	45.934	5.86	46.6163
5.865	206.131	5.865	44.5796	5.865	60.751	5.865	43.9267	5.865	45.6203
5.87	209.818	5.87	46.0309	5.87	61.0483	5.87	44.0918	5.87	44.3847
5.875	211.461	5.875	46.8115	5.875	60.5928	5.875	44.3137	5.875	45.4882
5.88	210.896	5.88	47.3916	5.88	60.1081	5.88	43.026	5.88	47.3441
5.885	211.872	5.885	47.1179	5.885	58.404	5.885	46.8723	5.885	48.5331
5.89	210.912	5.89	47.2805	5.89	59.5641	5.89	48.6928	5.89	50.3529
5.895	209.729	5.895	46.5682	5.895	59.9243	5.895	49.8641	5.895	51.2136
5.9	207.192	5.9	46.0119	5.9	60.1729	5.9	49.0732	5.9	48.2948
5.905	206.04	5.905	45.1865	5.905	59.0245	5.905	49.2299	5.905	46.0197
5.91	205.452	5.91	41.8134	5.91	57.6011	5.91	47.0833	5.91	44.1956
5.915	202.318	5.915	39.2941	5.915	58.4366	5.915	46.3792	5.915	42.4751
5.92	201.362	5.92	38.2057	5.92	59.067	5.92	46.5535	5.92	40.3113
5.925	204.967	5.925	38.3048	5.925	59.5045	5.925	47.4087	5.925	39.8702
5.93	209.913	5.93	39.2449	5.93	59.5116	5.93	48.4603	5.93	40.6614
5.935	216.296	5.935	40.8374	5.935	60.3218	5.935	51.6431	5.935	43.6049
5.94	221.168	5.94	43.0732	5.94	59.9916	5.94	53.2246	5.94	45.9655
5.945	223.667	5.945	43.7612	5.945	59.0815	5.945	54.4147	5.945	48.1073
5.95	222.493	5.95	43.3159	5.95	56.972	5.95	53.7054	5.95	48.4243
5.955	215.985	5.955	41.7462	5.955	53.2927	5.955	53.7296	5.955	48.8501
5.96	211.179	5.96	42.0947	5.96	53.5217	5.96	53.9896	5.96	48.0356
5.965	210.381	5.965	42.0966	5.965	54.4329	5.965	53.1256	5.965	47.1055
5.97	211.064	5.97	43.1914	5.97	56.781	5.97	52.4855	5.97	45.2167
5.975	213.529	5.975	46.0572	5.975	59.8664	5.975	52.748	5.975	46.5253
5.98	217.285	5.98	47.9724	5.98	60.35	5.98	51.2737	5.98	47.9069
5.985	218.119	5.985	47.7861	5.985	61.0304	5.985	50.1415	5.985	49.3298
5.99	216.781	5.99	49.6838	5.99	59.401	5.99	49.975	5.99	48.2369
5.995	213.328	5.995	50.1144	5.995	58.3071	5.995	50.4701	5.995	46.9414
6	204.69	6	49.1425	6	59.1228	6	49.1916	6	45.5666
6.005	196.783	6.005	48.9326	6.005	61.497	6.005	50.8286	6.005	44.8206
6.01	192.414	6.01	50.595	6.01	63.2588	6.01	49.669	6.01	43.9062
6.015	194.876	6.015	50.929	6.015	64.8853	6.015	49.9013	6.015	43.5246
6.02	200.986	6.02	48.7889	6.02	67.3129	6.02	50.9395	6.02	43.4799
6.025	201.882	6.025	46.383	6.025	66.5772	6.025	51.7015	6.025	45.8925
6.03	204.445	6.03	45.0647	6.03	66.0023	6.03	53.1983	6.03	48.8927
6.035	208.458	6.035	44.5735	6.035	63.0933	6.035	50.5477	6.035	49.899
6.04	209.96	6.04	46.1888	6.04	59.2391	6.04	48.4339	6.04	50.8639
6.045	210.023	6.045	48.0789	6.045	56.7137	6.045	48.8385	6.045	51.7443
6.05	209.267	6.05	50.1125	6.05	55.1523	6.05	48.0668	6.05	51.8103
6.055	210.365	6.055	49.8234	6.055	54.6937	6.055	45.697	6.055	51.1019
6.06	214.959	6.06	51.7275	6.06	54.3362	6.06	45.9937	6.06	49.4875
6.065	221.131	6.065	51.977	6.065	55.2217	6.065	47.2529	6.065	46.8378
6.07	222.679	6.07	50.8708	6.07	56.4215	6.07	48.232	6.07	45.0179
6.075	222.544	6.075	48.0564	6.075	60.1056	6.075	50.9804	6.075	44.4809
6.08	220.567	6.08	48.0565	6.08	62.5467	6.08	48.9013	6.08	44.1715
6.085	216.69	6.085	47.454	6.085	62.4262	6.085	47.9546	6.085	42.3141
6.09	213.356	6.09	46.8799	6.09	59.5349	6.09	47.6631	6.09	40.5695
6.095	207.782	6.095	46.8088	6.095	58.1256	6.095	48.861	6.095	39.8706
6.1	205.013	6.1	46.4418	6.1	57.0549	6.1	50.0679	6.1	39.1065
6.105	202.649	6.105	45.9783	6.105	54.8769	6.105	49.6607	6.105	39.5538
6.11	201.7	6.11	47.2624	6.11	53.7094	6.11	49.6441	6.11	39.564
6.115	201.495	6.115	50.5361	6.115	53.2869	6.115	51.5862	6.115	40.0371
6.12	200.998	6.12	52.5292	6.12	54.1828	6.12	51.0284	6.12	40.5141
6.125	203.25	6.125	53.7457	6.125	56.3168	6.125	50.2472	6.125	42.0666
6.13	203.609	6.13	54.924	6.13	58.9745	6.13	49.9877	6.13	43.9309
6.135	202.883	6.135	55.5527	6.135	61.8328	6.135	49.0896	6.135	43.5176
6.14	202.501	6.14	57.883	6.14	62.8758	6.14	49.9273	6.14	43.4188
6.145	202.595	6.145	57.9393	6.145	61.7686	6.145	50.5068	6.145	45.0996
6.15	205.085	6.15	56.7482	6.15	61.6169	6.15	49.1143	6.15	45.7107
6.155	206.837	6.155	55.886	6.155	61.0868	6.155	48.8897	6.155	44.6558
6.16	210.839	6.16	55.5294	6.16	59.8766	6.16	50.1283	6.16	43.8023
6.165	217.462	6.165	54.2846	6.165	59.0598	6.165	51.985	6.165	43.6274
6.17	224.599	6.17	52.6971	6.17	57.0911	6.17	52.0531	6.17	43.9026
6.175	229.002	6.175	52.7471	6.175	56.3951	6.175	51.5547	6.175	44.8567
6.18	232.814	6.18	52.7763	6.18	58.0812	6.18	49.5639	6.18	43.2583
6.185	233.541	6.185	54.1179	6.185	58.3684	6.185	49.5877	6.185	42.5451
6.19	231.136	6.19	56.1261	6.19	58.3349	6.19	48.194	6.19	40.3157
6.195	229.093	6.195	55.8876	6.195	58.5996	6.195	46.562	6.195	39.9715
6.2	224.167	6.2	55.4241	6.2	59.3106	6.2	45.0793	6.2	41.3115
6.205	220.028	6.205	55.2878	6.205	60.162	6.205	45.7602	6.205	42.0003
6.21	218.336	6.21	55.7654	6.21	61.1986	6.21	48.0166	6.21	44.0537
6.215	217.788	6.215	54.4379	6.215	60.4302	6.215	49.6913	6.215	47.2819
6.22	219.527	6.22	53.5992	6.22	59.7142	6.22	51.2955	6.22	50.1773
6.225	220.793	6.225	52.1358	6.225	60.2402	6.225	52.2831	6.225	50.1727
6.23	222.652	6.23	51.1831	6.23	62.0284	6.23	52.1403	6.23	49.3232
6.235	224.037	6.235	49.4093	6.235	64.5846	6.235	51.7526	6.235	49.2679
6.24	223.378	6.24	47.8667	6.24	62.9709	6.24	52.7267	6.24	50.9072
6.245	220.967	6.245	47.7947	6.245	61.9982	6.245	53.0523	6.245	52.5162
6.25	218.705	6.25	48.0951	6.25	62.2113	6.25	50.6147	6.25	52.0847
6.255	221.099	6.255	50.2035	6.255	60.9937	6.255	51.0531	6.255	52.5826
6.26	222.821	6.26	53.5735	6.26	61.0596	6.26	50.2207	6.26	51.8586
6.265	225.988	6.265	54.5376	6.265	61.2517	6.265	49.0223	6.265	52.428
6.27	230.252	6.27	56.8962	6.27	62.0372	6.27	46.9232	6.27	52.3019
6.275	233.736	6.275	58.8725	6.275	61.8621	6.275	47.8992	6.275	50.7122
6.28	234.489	6.28	58.6637	6.28	62.3235	6.28	47.9692	6.28	48.6031
6.285	230.276	6.285	57.6896	6.285	62.7004	6.285	47.1663	6.285	47.87
6.29	221.589	6.29	57.9089	6.29	60.8593	6.29	47.0859	6.29	49.5902
6.295	215.844	6.295	57.6551	6.295	60.0461	6.295	48.6093	6.295	49.2342
6.3	215.385	6.3	58.3374	6.3	57.8176	6.3	48.6855	6.3	47.9397
6.305	219.077	6.305	58.8497	6.305	57.8742	6.305	48.3226	6.305	48.0944
6.31	226.186	6.31	59.1892	6.31	57.903	6.31	49.3996	6.31	48.5188
6.315	232.894	6.315	56.77	6.315	58.5942	6.315	50.851	6.315	48.6543
6.32	238.694	6.32	54.5267	6.32	60.6892	6.32	51.1177	6.32	46.8418
6.325	240.696	6.325	52.9337	6.325	62.0322	6.325	52.4759	6.325	45.9538
6.33	236.417	6.33	50.8191	6.33	62.6043	6.33	52.0643	6.33	45.5254
6.335	230.849	6.335	48.4082	6.335	62.7242	6.335	51.2168	6.335	46.4133
6.34	226.498	6.34	50.1967	6.34	63.5302	6.34	48.4353	6.34	47.9804
6.345	224.298	6.345	52.354	6.345	65.8681	6.345	48.1594	6.345	49.834
6.35	229.986	6.35	55.5577	6.35	67.9245	6.35	46.415	6.35	51.0864
6.355	243.228	6.355	58.3904	6.355	70.2533	6.355	44.3899	6.355	50.6837
6.36	248.643	6.36	57.5912	6.36	70.8243	6.36	44.7464	6.36	50.2642
6.365	249.295	6.365	58.013	6.365	70.4254	6.365	45.7711	6.365	49.7979
6.37	247.934	6.37	56.6676	6.37	70.3016	6.37	45.8311	6.37	49.2092
6.375	244.131	6.375	55.0812	6.375	69.9526	6.375	46.4393	6.375	50.2147
6.38	239.373	6.38	54.1202	6.38	69.2448	6.38	46.1311	6.38	50.9518
6.385	234.145	6.385	53.4081	6.385	66.9974	6.385	46.2093	6.385	51.8654
6.39	234.425	6.39	55.6494	6.39	67.6229	6.39	44.3641	6.39	50.5809
6.395	234.432	6.395	58.1922	6.395	67.5037	6.395	43.2792	6.395	49.4679
6.4	238.288	6.4	58.9442	6.4	66.0564	6.4	42.6033	6.4	47.6066
6.405	245.978	6.405	58.0283	6.405	62.0026	6.405	42.1293	6.405	46.871
6.41	248.371	6.41	57.8929	6.41	58.7456	6.41	42.5564	6.41	46.0037
6.415	244.587	6.415	55.0315	6.415	59.0884	6.415	44.4484	6.415	45.8515
6.42	238.814	6.42	55.0454	6.42	61.1962	6.42	44.8969	6.42	47.7743
6.425	238.454	6.425	54.314	6.425	65.6281	6.425	44.5503	6.425	48.272
6.43	237.181	6.43	52.4016	6.43	71.7682	6.43	47.5111	6.43	48.7595
6.435	232.933	6.435	52.4601	6.435	74.6935	6.435	48.7125	6.435	47.7493
6.44	229.162	6.44	54.0441	6.44	76.4746	6.44	48.2553	6.44	46.1013
6.445	227.137	6.445	55.3097	6.445	75.0848	6.445	49.1588	6.445	44.6016
6.45	227.24	6.45	55.1135	6.45	71.8565	6.45	50.24	6.45	43.2663
6.455	227.597	6.455	54.3154	6.455	66.4293	6.455	50.6202	6.455	43.6205
6.46	227.882	6.46	54.4089	6.46	63.0352	6.46	49.3641	6.46	44.1005
6.465	223.637	6.465	55.9615	6.465	62.6985	6.465	48.1839	6.465	43.8165
6.47	220.451	6.47	57.0915	6.47	64.9241	6.47	47.8145	6.47	41.9571
6.475	219.045	6.475	59.8084	6.475	67.2177	6.475	48.0021	6.475	42.0572
6.48	214.435	6.48	61.9384	6.48	68.7186	6.48	48.8044	6.48	40.3812
6.485	212.186	6.485	61.943	6.485	68.4152	6.485	49.6665	6.485	38.2157
6.49	210.962	6.49	62.6429	6.49	67.6106	6.49	49.5688	6.49	38.005
6.495	213.334	6.495	61.1961	6.495	65.6157	6.495	47.5193	6.495	37.383
6.5	217.324	6.5	60.0301	6.5	65.882	6.5	47.5212	6.5	40.3904
6.505	224.005	6.505	57.551	6.505	67.5352	6.505	47.9537	6.505	43.0746
6.51	227.064	6.51	58.5644	6.51	70.7277	6.51	47.6035	6.51	45.9792
6.515	232.117	6.515	60.598	6.515	74.0476	6.515	47.3186	6.515	47.8384
6.52	236.612	6.52	62.9722	6.52	77.924	6.52	46.1905	6.52	49.0774
6.525	239.304	6.525	63.3945	6.525	79.5276	6.525	47.3104	6.525	49.1679
6.53	244.927	6.53	62.8986	6.53	78.4473	6.53	47.864	6.53	48.1909
6.535	248.47	6.535	62.2998	6.535	77.3082	6.535	47.3633	6.535	46.4514
6.54	249.757	6.54	60.5156	6.54	75.7919	6.54	46.0698	6.54	44.1361
6.545	247.676	6.545	59.0588	6.545	75.487	6.545	45.6584	6.545	43.596
6.55	241.86	6.55	58.7204	6.55	75.9023	6.55	47.72	6.55	43.4122
6.555	238.043	6.555	60.4787	6.555	76.119	6.555	49.7347	6.555	43.8702
6.56	233.603	6.56	62.4629	6.56	75.6097	6.56	51.3103	6.56	45.8502
6.565	235.405	6.565	62.3261	6.565	74.7959	6.565	51.674	6.565	46.7371
6.57	234.779	6.57	62.4689	6.57	73.9028	6.57	51.1456	6.57	48.2188
6.575	236.816	6.575	61.7614	6.575	75.2049	6.575	51.3006	6.575	48.143
6.58	232.266	6.58	61.54	6.58	76.5023	6.58	51.8861	6.58	48.4318
6.585	231.169	6.585	62.0544	6.585	77.6105	6.585	50.4732	6.585	48.0371
6.59	232.639	6.59	63.4749	6.59	79.3073	6.59	48.7398	6.59	48.8946
6.595	230.246	6.595	62.0277	6.595	80.5162	6.595	48.1193	6.595	48.56
6.6	232.57	6.6	61.0797	6.6	83.7185	6.6	48.2089	6.6	48.8257
6.605	236.501	6.605	61.6125	6.605	87.0182	6.605	50.0807	6.605	48.9399
6.61	240.755	6.61	62.6355	6.61	88.1501	6.61	51.3361	6.61	47.902
6.615	241.744	6.615	61.3488	6.615	87.2054	6.615	49.885	6.615	45.9192
6.62	241.17	6.62	60.7083	6.62	85.3574	6.62	49.8737	6.62	44.1691
6.625	241.985	6.625	62.0151	6.625	83.8397	6.625	49.6251	6.625	43.1772
6.63	241.489	6.63	62.4533	6.63	81.4502	6.63	49.5838	6.63	42.4931
6.635	246.226	6.635	63.792	6.635	77.9819	6.635	51.683	6.635	41.0442
6.64	248.023	6.64	65.4687	6.64	75.0428	6.64	51.785	6.64	40.6725
6.645	248.319	6.645	64.4871	6.645	75.4626	6.645	51.4316	6.645	42.6633
6.65	245.684	6.65	62.3772	6.65	76.1661	6.65	50.9137	6.65	43.7984
6.655	239.497	6.655	62.2019	6.655	78.84	6.655	50.6029	6.655	43.7307
6.66	237.711	6.66	62.7524	6.66	81.8294	6.66	50.3178	6.66	42.4967
6.665	235.061	6.665	61.18	6.665	82.4667	6.665	47.2201	6.665	40.362
6.67	232.841	6.67	61.1355	6.67	82.9577	6.67	44.5448	6.67	40.6027
6.675	231.052	6.675	63.6221	6.675	83.6171	6.675	43.3188	6.675	42.4329
6.68	230.331	6.68	66.3223	6.68	85.9309	6.68	43.6002	6.68	43.8965
6.685	230.203	6.685	66.2471	6.685	85.2286	6.685	43.8026	6.685	45.5107
6.69	229.557	6.69	64.0293	6.69	84.8371	6.69	44.7278	6.69	47.7273
6.695	228.863	6.695	61.209	6.695	85.0249	6.695	46.3439	6.695	50.5838
6.7	230.655	6.7	57.4613	6.7	84.7669	6.7	47.4734	6.7	53.2542
6.705	236.593	6.705	56.7586	6.705	83.1119	6.705	50.4915	6.705	52.6094
6.71	239.03	6.71	58.4983	6.71	81.3753	6.71	52.6271	6.71	50.9033
6.715	240.161	6.715	61.7062	6.715	79.3187	6.715	51.8938	6.715	51.2899
6.72	238.921	6.72	63.2493	6.72	76.9679	6.72	50.3036	6.72	50.4811
6.725	231.398	6.725	67.4532	6.725	76.5409	6.725	48.9543	6.725	48.8909
6.73	222.514	6.73	70.6569	6.73	78.0557	6.73	47.1623	6.73	46.5069
6.735	220.059	6.735	69.8012	6.735	81.7811	6.735	45.4013	6.735	44.3927
6.74	222.219	6.74	70.2005	6.74	85.687	6.74	45.6499	6.74	42.6231
6.745	222.823	6.745	70.6135	6.745	89.0103	6.745	46.682	6.745	43.0661
6.75	220.06	6.75	71.6482	6.75	93.1628	6.75	47.9594	6.75	43.2112
6.755	221.085	6.755	72.6988	6.755	93.1322	6.755	50.0521	6.755	44.9658
6.76	219.581	6.76	74.3012	6.76	93.0676	6.76	52.5747	6.76	46.8375
6.765	215.502	6.765	77.3457	6.765	91.7313	6.765	53.9952	6.765	47.4009
6.77	212.815	6.77	78.4528	6.77	89.5559	6.77	53.654	6.77	47.2164
6.775	212.946	6.775	78.7109	6.775	89.8684	6.775	52.0687	6.775	46.4562
6.78	214.434	6.78	76.0828	6.78	89.9287	6.78	52.2255	6.78	45.915
6.785	221.538	6.785	74.0649	6.785	88.6114	6.785	50.423	6.785	45.5408
6.79	229.948	6.79	70.1883	6.79	88.3959	6.79	51.4097	6.79	46.7843
6.795	234.843	6.795	69.5574	6.795	89.2744	6.795	51.0086	6.795	48.578
6.8	233.639	6.8	71.3378	6.8	89.844	6.8	48.3998	6.8	49.2929
6.805	235.196	6.805	71.6011	6.805	91.0519	6.805	47.578	6.805	48.3706
6.81	239.965	6.81	75.6977	6.81	92.6565	6.81	47.8612	6.81	48.7929
6.815	240.281	6.815	77.6274	6.815	93.457	6.815	48.1804	6.815	47.6692
6.82	238.463	6.82	79.9674	6.82	93.8164	6.82	48.4048	6.82	46.3069
6.825	239.769	6.825	80.6885	6.825	94.5222	6.825	48.4405	6.825	45.1391
6.83	239.384	6.83	77.2221	6.83	93.7386	6.83	49.9322	6.83	45.2575
6.835	239.476	6.835	74.4885	6.835	91.7802	6.835	51.1307	6.835	46.6103
6.84	237.095	6.84	72.3199	6.84	89.4719	6.84	51.0177	6.84	48.4004
6.845	237.877	6.845	72.9143	6.845	88.0797	6.845	49.9609	6.845	51.5512
6.85	240.495	6.85	74.8605	6.85	88.6553	6.85	50.3691	6.85	52.4405
6.855	241.608	6.855	76.2643	6.855	89.1862	6.855	48.2354	6.855	51.0277
6.86	243.757	6.86	77.763	6.86	90.6875	6.86	49.0261	6.86	49.2207
6.865	242.101	6.865	78.8916	6.865	93.3677	6.865	49.9494	6.865	48.899
6.87	239.16	6.87	78.3041	6.87	92.4138	6.87	48.0177	6.87	48.4003
6.875	237.153	6.875	76.8028	6.875	89.6527	6.875	45.5729	6.875	46.7303
6.88	232.567	6.88	76.7514	6.88	87.0585	6.88	45.1645	6.88	48.3075
6.885	226.048	6.885	74.4279	6.885	84.6742	6.885	46.2996	6.885	49.3352
6.89	220.469	6.89	74.1141	6.89	82.7782	6.89	48.0952	6.89	50.8018
6.895	220.73	6.895	79.1303	6.895	84.3436	6.895	49.341	6.895	51.1174
6.9	221.431	6.9	83.8623	6.9	84.3461	6.9	50.4599	6.9	50.4062
6.905	223.112	6.905	87.0909	6.905	86.332	6.905	52.0398	6.905	48.7982
6.91	221.553	6.91	89.1217	6.91	89.2089	6.91	50.6831	6.91	47.5447
6.915	225.117	6.915	89.4783	6.915	90.2858	6.915	49.4188	6.915	45.8476
6.92	227.876	6.92	89.3593	6.92	91.7619	6.92	47.6028	6.92	43.9703
6.925	227.507	6.925	88.447	6.925	92.2353	6.925	44.7871	6.925	43.593
6.93	229.687	6.93	89.5032	6.93	92.7299	6.93	43.5288	6.93	42.543
6.935	228.667	6.935	91.8887	6.935	95.7728	6.935	43.9357	6.935	41.5071
6.94	231.202	6.94	90.7274	6.94	97.1191	6.94	45.3453	6.94	41.7868
6.945	237.859	6.945	93.5901	6.945	96.7078	6.945	44.6364	6.945	42.8058
6.95	241.881	6.95	95.7451	6.95	97.1295	6.95	44.7377	6.95	45.2129
6.955	244.486	6.955	96.5329	6.955	96.6655	6.955	45.4583	6.955	47.7918
6.96	239.518	6.96	94.9938	6.96	94.0115	6.96	46.3902	6.96	49.2266
6.965	235.159	6.965	92.4324	6.965	92.402	6.965	46.5784	6.965	48.778
6.97	231.414	6.97	91.0507	6.97	89.646	6.97	46.3101	6.97	48.0193
6.975	225.553	6.975	88.5286	6.975	88.0912	6.975	46.7184	6.975	45.89
6.98	221.191	6.98	88.9453	6.98	85.8123	6.98	48.6076	6.98	45.7347
6.985	224.076	6.985	90.6587	6.985	84.1062	6.985	51.346	6.985	44.4321
6.99	224.931	6.99	92.6124	6.99	83.373	6.99	52.7759	6.99	45.1094
6.995	226.035	6.995	95.2964	6.995	83.9096	6.995	53.3586	6.995	47.1556
7	227.986	7	96.9871	7	85.4965	7	52.2152	7	48.2752
7.005	226.508	7.005	98.1213	7.005	86.924	7.005	49.8868	7.005	48.7381
7.01	223.497	7.01	96.2758	7.01	87.4684	7.01	50.6276	7.01	49.2244
7.015	224.061	7.015	95.1076	7.015	87.2692	7.015	49.5674	7.015	48.1183
7.02	226.583	7.02	92.6208	7.02	89.8396	7.02	48.4658	7.02	46.2164
7.025	233.88	7.025	92.655	7.025	92.0062	7.025	48.7598	7.025	43.7214
7.03	240.169	7.03	93.9926	7.03	92.108	7.03	50.1048	7.03	43.1148
7.035	245.217	7.035	95.4378	7.035	91.2369	7.035	52.2372	7.035	42.6099
7.04	246.39	7.04	98.5592	7.04	91.5874	7.04	54.0196	7.04	44.1695
7.045	245.268	7.045	99.3308	7.045	92.7007	7.045	54.5482	7.045	44.6151
7.05	244.756	7.05	100.255	7.05	91.8661	7.05	55.2447	7.05	46.9276
7.055	245.08	7.055	102.193	7.055	92.084	7.055	56.0532	7.055	48.9944
7.06	242.196	7.06	104.139	7.06	92.9398	7.06	56.4779	7.06	51.2783
7.065	241.154	7.065	105.814	7.065	92.8605	7.065	57.0906	7.065	52.5907
7.07	237.221	7.07	104.788	7.07	92.4792	7.07	56.6968	7.07	51.9575
7.075	238.296	7.075	103.628	7.075	90.1082	7.075	55.9524	7.075	51.0039
7.08	240.161	7.08	104.051	7.08	87.3999	7.08	56.478	7.08	49.7934
7.085	240.739	7.085	105.076	7.085	85.9526	7.085	56.1666	7.085	48.7172
7.09	239.86	7.09	105.954	7.09	85.2267	7.09	56.0216	7.09	48.0831
7.095	237.604	7.095	108.751	7.095	86.5403	7.095	55.4761	7.095	47.9239
7.1	236.957	7.1	110.372	7.1	88.2529	7.1	54.9502	7.1	49.7938
7.105	239.579	7.105	111.056	7.105	88.824	7.105	52.6009	7.105	50.8367
7.11	236.883	7.11	111.903	7.11	89.8034	7.11	50.4807	7.11	51.5329
7.115	234.149	7.115	111.184	7.115	91.2058	7.115	50.0911	7.115	51.0179
7.12	236.789	7.12	109.376	7.12	91.2827	7.12	49.0436	7.12	51.3768
7.125	241.233	7.125	108.107	7.125	91.2056	7.125	49.7945	7.125	52.0309
7.13	245.307	7.13	108.178	7.13	90.7785	7.13	51.6564	7.13	51.1978
7.135	251.448	7.135	109.906	7.135	91.0258	7.135	52.2194	7.135	49.8647
7.14	251.448	7.14	111.556	7.14	91.8581	7.14	52.1137	7.14	48.8002
7.145	248.885	7.145	111.54	7.145	90.9963	7.145	51.019	7.145	48.6567
7.15	244.324	7.15	111.202	7.15	89.59	7.15	48.4589	7.15	46.6855
7.155	238.809	7.155	109.831	7.155	87.8044	7.155	46.4073	7.155	46.0044
7.16	238.496	7.16	107.467	7.16	85.9269	7.16	44.8069	7.16	43.8444
7.165	239.142	7.165	106.403	7.165	86.0412	7.165	44.4241	7.165	43.1415
7.17	242.269	7.17	104.98	7.17	88.0913	7.17	47.1901	7.17	44.4633
7.175	247.889	7.175	104.643	7.175	91.4036	7.175	49.8265	7.175	45.5845
7.18	249.785	7.18	104.335	7.18	94.2266	7.18	52.3948	7.18	45.5893
7.185	251.051	7.185	101.849	7.185	94.4228	7.185	55.3214	7.185	45.0285
7.19	251.039	7.19	102.715	7.19	94.494	7.19	56.7131	7.19	44.5158
7.195	249.054	7.195	103.043	7.195	95.1696	7.195	56.0769	7.195	43.5706
7.2	245.587	7.2	102.154	7.2	94.1198	7.2	57.2247	7.2	41.8856
7.205	244.942	7.205	101.879	7.205	92.3962	7.205	58.0407	7.205	42.4432
7.21	248.347	7.21	103.985	7.21	92.4357	7.21	57.2975	7.21	43.7402
7.215	253.776	7.215	105.021	7.215	93.0641	7.215	54.4563	7.215	47.4106
7.22	260.073	7.22	107.296	7.22	92.9498	7.22	52.8456	7.22	48.2923
7.225	262.545	7.225	107.027	7.225	92.2185	7.225	53.7102	7.225	49.669
7.23	265.449	7.23	108.263	7.23	92.0494	7.23	56.7792	7.23	49.0226
7.235	271.353	7.235	108.851	7.235	91.5936	7.235	61.0205	7.235	48.4848
7.24	273.439	7.24	108.558	7.24	90.9404	7.24	64.9686	7.24	46.9405
7.245	275.039	7.245	108.231	7.245	91.7747	7.245	68.2718	7.245	46.0259
7.25	270.875	7.25	108.606	7.25	94.6037	7.25	67.5177	7.25	45.5546
7.255	267.754	7.255	107.671	7.255	94.4287	7.255	65.0512	7.255	46.2323
7.26	264.08	7.26	108.815	7.26	92.2618	7.26	61.4848	7.26	47.7602
7.265	261.631	7.265	111.272	7.265	90.1844	7.265	56.5243	7.265	47.9489
7.27	263.312	7.27	112.826	7.27	86.845	7.27	54.5213	7.27	47.8746
7.275	268.214	7.275	111.994	7.275	84.4686	7.275	55.6352	7.275	48.2588
7.28	271.576	7.28	111.173	7.28	82.3851	7.28	57.0499	7.28	47.1621
7.285	272.903	7.285	110.075	7.285	82.8026	7.285	58.7474	7.285	48.5225
7.29	275.612	7.29	108.11	7.29	82.0163	7.29	59.4221	7.29	48.6156
7.295	271.798	7.295	103.751	7.295	83.454	7.295	59.6767	7.295	50.6434
7.3	266.439	7.3	101.393	7.3	85.4526	7.3	59.2768	7.3	52.634
7.305	267.572	7.305	100.328	7.305	86.0693	7.305	59.0318	7.305	54.5346
7.31	266.707	7.31	101.037	7.31	86.0351	7.31	59.1644	7.31	53.8441
7.315	267.674	7.315	102.943	7.315	87.3178	7.315	58.7978	7.315	53.1157
7.32	268.753	7.32	104.546	7.32	89.1997	7.32	57.3792	7.32	50.416
7.325	270.191	7.325	104.674	7.325	91.3478	7.325	56.8396	7.325	48.2368
7.33	270.354	7.33	103.944	7.33	92.3316	7.33	57.0113	7.33	46.2693
7.335	265.983	7.335	103.785	7.335	92.0178	7.335	57.8653	7.335	44.7885
7.34	262.359	7.34	102.874	7.34	88.4829	7.34	59.1373	7.34	45.1032
7.345	260.521	7.345	101.681	7.345	86.9937	7.345	60.9819	7.345	47.8797
7.35	257.772	7.35	98.0231	7.35	86.3122	7.35	64.1644	7.35	51.1612
7.355	256.118	7.355	99.2841	7.355	85.6505	7.355	64.9611	7.355	53.7575
7.36	257.782	7.36	101.911	7.36	84.4912	7.36	63.9874	7.36	53.0198
7.365	259.552	7.365	108.174	7.365	85.1817	7.365	63.8308	7.365	52.8635
7.37	260.911	7.37	113.947	7.37	86.2122	7.37	63.3294	7.37	50.3446
7.375	266.566	7.375	118.521	7.375	87.1231	7.375	63.1667	7.375	47.5624
7.38	273.512	7.38	121.805	7.38	88.8253	7.38	66.1751	7.38	46.0546
7.385	275.329	7.385	123.531	7.385	90.9724	7.385	67.0877	7.385	47.5324
7.39	275.357	7.39	123.236	7.39	90.7498	7.39	68.7895	7.39	48.5166
7.395	275.738	7.395	122.513	7.395	91.4383	7.395	68.1099	7.395	48.861
7.4	275.624	7.4	121.128	7.4	92.1845	7.4	67.7413	7.4	48.7084
7.405	273.771	7.405	120.438	7.405	92.3199	7.405	66.5357	7.405	48.5132
7.41	276.598	7.41	120.783	7.41	91.229	7.41	63.7053	7.41	48.2773
7.415	278.481	7.415	123.535	7.415	89.0629	7.415	62.157	7.415	48.0994
7.42	278.182	7.42	122.022	7.42	88.719	7.42	63.1778	7.42	48.9151
7.425	276.362	7.425	120.668	7.425	88.8413	7.425	63.0601	7.425	50.8875
7.43	273.489	7.43	117.61	7.43	91.3302	7.43	62.9311	7.43	52.2676
7.435	273.051	7.435	117.462	7.435	92.2476	7.435	64.0398	7.435	55.3777
7.44	270.875	7.44	116.877	7.44	92.071	7.44	65.3978	7.44	57.2736
7.445	268.228	7.445	117.272	7.445	91.2939	7.445	62.345	7.445	57.0386
7.45	270.304	7.45	119.026	7.45	91.1051	7.45	60.7941	7.45	55.4874
7.455	270.782	7.455	118.653	7.455	91.0889	7.455	58.6777	7.455	53.9426
7.46	272.064	7.46	118.823	7.46	89.6667	7.46	59.4096	7.46	52.6722
7.465	275.91	7.465	119.283	7.465	87.9722	7.465	57.6399	7.465	50.7901
7.47	278.513	7.47	119.218	7.47	89.4476	7.47	57.116	7.47	49.6761
7.475	275.016	7.475	115.862	7.475	90.1043	7.475	57.9036	7.475	50.3649
7.48	270.365	7.48	115.3	7.48	92.0253	7.48	58.8087	7.48	52.9406
7.485	265.648	7.485	116.678	7.485	91.9522	7.485	60.1729	7.485	53.5235
7.49	260.941	7.49	118.069	7.49	91.2473	7.49	60.7152	7.49	53.1757
7.495	255.483	7.495	121.906	7.495	91.0863	7.495	60.2728	7.495	53.4209
7.5	251.032	7.5	123.769	7.5	91.303	7.5	59.0921	7.5	50.9968
7.505	255.24	7.505	126.6	7.505	89.0473	7.505	58.5562	7.505	48.4678
7.51	260.317	7.51	126.044	7.51	87.1155	7.51	60.5197	7.51	47.7675
7.515	262.575	7.515	124.387	7.515	87.0822	7.515	58.9228	7.515	46.3221
7.52	261.637	7.52	122.229	7.52	88.3028	7.52	58.1645	7.52	46.4328
7.525	256.33	7.525	117.484	7.525	90.5881	7.525	59.5939	7.525	47.6002
7.53	249.817	7.53	116.072	7.53	91.8875	7.53	61.4038	7.53	48.9874
7.535	245.608	7.535	117.168	7.535	92.3842	7.535	60.8823	7.535	48.9419
7.54	249.311	7.54	122.622	7.54	93.6186	7.54	60.8091	7.54	47.7027
7.545	256.376	7.545	124.997	7.545	92.7714	7.545	61.7702	7.545	47.0471
7.55	263.537	7.55	128.119	7.55	90.6391	7.55	60.0677	7.55	47.8773
7.555	267.387	7.555	130.361	7.555	88.2059	7.555	57.2632	7.555	46.1757
7.56	270.933	7.56	130.731	7.56	87.6284	7.56	56.462	7.56	45.8546
7.565	270.325	7.565	132.29	7.565	87.0941	7.565	56.2001	7.565	46.0507
7.57	263.672	7.57	130.343	7.57	88.92	7.57	56.3332	7.57	43.4447
7.575	262.35	7.575	128.743	7.575	89.2933	7.575	56.2782	7.575	42.1779
7.58	262.81	7.58	126.375	7.58	88.0817	7.58	59.3821	7.58	42.7079
7.585	265.277	7.585	124.212	7.585	89.1881	7.585	59.4547	7.585	41.9191
7.59	267.082	7.59	124.692	7.59	90.0567	7.59	60.9596	7.59	42.4287
7.595	269.617	7.595	124.558	7.595	89.3538	7.595	64.7117	7.595	42.9945
7.6	272.618	7.6	126.789	7.6	88.5767	7.6	65.1872	7.6	44.1375
7.605	274.2	7.605	128.339	7.605	87.6052	7.605	62.1729	7.605	43.7087
7.61	276.676	7.61	131.477	7.61	85.6379	7.61	58.4506	7.61	43.3321
7.615	278.159	7.615	132.913	7.615	85.9363	7.615	58.6564	7.615	42.8867
7.62	278.101	7.62	131.754	7.62	85.455	7.62	56.09	7.62	42.8664
7.625	275.153	7.625	129.464	7.625	85.9212	7.625	54.0751	7.625	40.684
7.63	272.641	7.63	128.875	7.63	86.765	7.63	53.6689	7.63	41.2495
7.635	270.665	7.635	129.15	7.635	87.635	7.635	54.1245	7.635	43.3459
7.64	264.013	7.64	130.212	7.64	89.4287	7.64	55.4814	7.64	43.9938
7.645	257.629	7.645	131.43	7.645	92.1094	7.645	56.6535	7.645	45.486
7.65	254.473	7.65	131.674	7.65	92.0431	7.65	57.9612	7.65	44.8814
7.655	257.464	7.655	130.187	7.655	93.7642	7.655	56.3439	7.655	44.2097
7.66	263.591	7.66	128.104	7.66	93.3743	7.66	55.107	7.66	44.364
7.665	268.756	7.665	125.208	7.665	93.8028	7.665	56.7651	7.665	44.1092
7.67	274.069	7.67	124.937	7.67	93.9055	7.67	58.945	7.67	44.5161
7.675	278.964	7.675	124.338	7.675	91.899	7.675	60.8022	7.675	44.291
7.68	278.827	7.68	126.596	7.68	88.4343	7.68	59.9667	7.68	44.2228
7.685	275.663	7.685	129.896	7.685	87.2603	7.685	61.6826	7.685	44.8352
7.69	270.221	7.69	130.294	7.69	86.6004	7.69	61.3629	7.69	45.4395
7.695	266.972	7.695	129.47	7.695	87.6677	7.695	61.4429	7.695	45.3772
7.7	266.226	7.7	128.722	7.7	87.8055	7.7	60.1948	7.7	46.5277
7.705	272.083	7.705	127.479	7.705	89.2105	7.705	60.3059	7.705	46.9364
7.71	280.18	7.71	127.608	7.71	90.5144	7.71	59.7768	7.71	47.5633
7.715	286.948	7.715	129.522	7.715	92.0993	7.715	57.8953	7.715	48.4793
7.72	287.075	7.72	131.531	7.72	92.6344	7.72	55.0116	7.72	49.2571
7.725	286.2	7.725	134.341	7.725	93.7094	7.725	53.5952	7.725	49.7639
7.73	280.304	7.73	135.465	7.73	91.7117	7.73	52.3923	7.73	50.2605
7.735	270.495	7.735	136.816	7.735	92.3752	7.735	53.9256	7.735	48.2497
7.74	264.63	7.74	136.16	7.74	93.3844	7.74	56.1198	7.74	45.7089
7.745	262.171	7.745	133.966	7.745	93.2137	7.745	59.5734	7.745	44.0599
7.75	259.813	7.75	133.961	7.75	92.5233	7.75	62.4958	7.75	44.2155
7.755	258.761	7.755	134.307	7.755	92.2554	7.755	66.0084	7.755	45.6237
7.76	260.115	7.76	133.841	7.76	91.7018	7.76	65.5932	7.76	45.975
7.765	260.903	7.765	134.551	7.765	90.9828	7.765	64.6996	7.765	46.788
7.77	261.523	7.77	135.292	7.77	90.0651	7.77	60.9852	7.77	47.8054
7.775	262.624	7.775	134.518	7.775	89.9287	7.775	60.7406	7.775	47.9797
7.78	264.44	7.78	132.578	7.78	89.5315	7.78	60.5858	7.78	47.7137
7.785	267.778	7.785	131.455	7.785	87.7999	7.785	59.1205	7.785	46.5958
7.79	266.523	7.79	131.354	7.79	89.3868	7.79	57.6284	7.79	47.4617
7.795	266.597	7.795	131.284	7.795	90.9763	7.795	56.9473	7.795	48.081
7.8	267.275	7.8	131.398	7.8	89.2622	7.8	56.1895	7.8	49.7571
7.805	264.931	7.805	133.021	7.805	86.9184	7.805	56.0973	7.805	50.6493
7.81	262.269	7.81	132.94	7.81	85.5321	7.81	55.978	7.81	50.1532
7.815	257.715	7.815	134.217	7.815	85.4222	7.815	57.2071	7.815	48.2928
7.82	256.04	7.82	136.688	7.82	85.1506	7.82	58.9228	7.82	46.5127
7.825	255.823	7.825	137.007	7.825	86.6506	7.825	60.9471	7.825	44.8859
7.83	260.237	7.83	137.749	7.83	87.5176	7.83	59.9726	7.83	43.4108
7.835	263.268	7.835	137.15	7.835	87.5861	7.835	60.77	7.835	45.0127
7.84	266.611	7.84	136.075	7.84	89.5226	7.84	58.3877	7.84	45.1722
7.845	270.454	7.845	134.445	7.845	91.7019	7.845	57.7077	7.845	45.7592
7.85	273.777	7.85	132.193	7.85	91.4324	7.85	56.9644	7.85	45.0749
7.855	276.557	7.855	130.126	7.855	87.984	7.855	55.7158	7.855	46.5062
7.86	274.31	7.86	129.367	7.86	86.1503	7.86	56.0615	7.86	49.5296
7.865	273.091	7.865	129.622	7.865	84.9986	7.865	56.3254	7.865	49.9713
7.87	277.35	7.87	132.924	7.87	84.7713	7.87	58.7653	7.87	49.1899
7.875	283.078	7.875	135.074	7.875	86.3854	7.875	59.0216	7.875	47.8554
7.88	286.076	7.88	134.538	7.88	87.3238	7.88	59.9299	7.88	46.9864
7.885	285.17	7.885	133.509	7.885	89.2154	7.885	61.979	7.885	45.6074
7.89	282.296	7.89	135.124	7.89	89.6205	7.89	61.8333	7.89	44.4245
7.895	276.309	7.895	135.57	7.895	92.8702	7.895	60.9937	7.895	43.4109
7.9	272.097	7.9	138.508	7.9	94.604	7.9	60.2068	7.9	43.2026
7.905	266.982	7.905	140.427	7.905	93.5793	7.905	58.7185	7.905	45.1086
7.91	263.653	7.91	140.922	7.91	91.6459	7.91	58.2466	7.91	47.3655
7.915	262.361	7.915	142.635	7.915	90.0332	7.915	58.5334	7.915	49.5036
7.92	264.826	7.92	142.886	7.92	88.2496	7.92	60.5039	7.92	48.8697
7.925	267.702	7.925	140.897	7.925	86.2716	7.925	62.1562	7.925	50.0714
7.93	267.324	7.93	139.261	7.93	86.7632	7.93	62.8629	7.93	51.8858
7.935	265.719	7.935	137.497	7.935	87.553	7.935	63.7912	7.935	51.3698
7.94	265.752	7.94	138.083	7.94	87.8657	7.94	65.7187	7.94	48.7411
7.945	270.546	7.945	139.883	7.945	90.8146	7.945	64.603	7.945	46.8189
7.95	277.652	7.95	142.379	7.95	93.0882	7.95	64.0001	7.95	44.2675
7.955	280.865	7.955	141.123	7.955	94.4821	7.955	64.9124	7.955	41.4289
7.96	283.583	7.96	141.326	7.96	92.5702	7.96	61.7705	7.96	41.6991
7.965	285.826	7.965	141.257	7.965	91.6382	7.965	59.3863	7.965	42.1535
7.97	288.657	7.97	141.848	7.97	91.6465	7.97	59.0883	7.97	43.9974
7.975	290.762	7.975	140.646	7.975	91.8934	7.975	58.168	7.975	46.4872
7.98	289.682	7.98	138.909	7.98	92.1618	7.98	60.2304	7.98	47.2455
7.985	287.279	7.985	140.013	7.985	95.4994	7.985	61.6613	7.985	48.2215
7.99	287.824	7.99	139.866	7.99	94.9442	7.99	64.0182	7.99	48.2309
7.995	288.931	7.995	138.727	7.995	91.8017	7.995	66.7338	7.995	48.741
8	289.226	8	141.122	8	91.1281	8	67.7036	8	48.669
8.005	284.113	8.005	142.031	8.005	91.7859	8.005	69.1913	8.005	50.5361
8.01	277.16	8.01	142.763	8.01	90.1333	8.01	69.0447	8.01	50.9179
8.015	271.402	8.015	142.406	8.015	90.8035	8.015	65.5139	8.015	52.2029
8.02	271.811	8.02	144.341	8.02	91.379	8.02	62.7451	8.02	51.2909
8.025	271.617	8.025	144.159	8.025	91.2643	8.025	63.9516	8.025	50.7767
8.03	274.557	8.03	144.691	8.03	91.2273	8.03	64.4256	8.03	50.1874
8.035	280.576	8.035	146.601	8.035	90.3856	8.035	66.1075	8.035	49.6487
8.04	286.403	8.04	146.686	8.04	87.0118	8.04	67.7345	8.04	49.8231
8.045	293.119	8.045	145.952	8.045	83.348	8.045	69.9051	8.045	50.0494
8.05	295	8.05	142.668	8.05	81.3567	8.05	73.3462	8.05	47.8883
8.055	294.068	8.055	142.914	8.055	84.6493	8.055	75.7345	8.055	47.4224
8.06	291.376	8.06	144.24	8.06	87.3751	8.06	74.517	8.06	46.0517
8.065	286.661	8.065	144.74	8.065	89.5313	8.065	71.8682	8.065	46.266
8.07	283.469	8.07	146.562	8.07	92.5957	8.07	70.0336	8.07	45.5268
8.075	277.203	8.075	148.339	8.075	94.966	8.075	69.1196	8.075	45.7325
8.08	273.411	8.08	151.07	8.08	95.4874	8.08	68.8528	8.08	46.3969
8.085	271.095	8.085	152.114	8.085	94.8919	8.085	67.2207	8.085	44.2355
8.09	272.497	8.09	152.31	8.09	94.3554	8.09	66.1413	8.09	42.1923
8.095	274.608	8.095	150.946	8.095	92.5414	8.095	65.7708	8.095	41.2083
8.1	277.809	8.1	151.069	8.1	90.6682	8.1	66.1758	8.1	39.3351
8.105	281.208	8.105	152.454	8.105	89.3456	8.105	67.6531	8.105	39.9422
8.11	283.936	8.11	155.248	8.11	87.3522	8.11	68.3115	8.11	41.5087
8.115	284.431	8.115	157.027	8.115	87.3601	8.115	69.0765	8.115	43.9439
8.12	282.657	8.12	153.914	8.12	87.5187	8.12	71.0724	8.12	46.2992
8.125	279.989	8.125	152.577	8.125	90.6231	8.125	74.6294	8.125	48.8927
8.13	277.427	8.13	151.285	8.13	93.8417	8.13	74.8653	8.13	49.1318
8.135	273.259	8.135	149.953	8.135	95.2352	8.135	73.1701	8.135	50.1791
8.14	272.14	8.14	148.732	8.14	94.8329	8.14	70.9772	8.14	49.3072
8.145	270.074	8.145	148.603	8.145	93.164	8.145	68.8131	8.145	46.5892
8.15	270.454	8.15	149.862	8.15	92.562	8.15	68.8351	8.15	46.0551
8.155	272.462	8.155	152.036	8.155	89.5265	8.155	68.5257	8.155	45.3041
8.16	279.346	8.16	155.177	8.16	88.454	8.16	68.958	8.16	44.1291
8.165	285.004	8.165	157.263	8.165	89.371	8.165	70.8263	8.165	43.7279
8.17	284.826	8.17	159.225	8.17	89.6871	8.17	73.4304	8.17	43.6666
8.175	281.365	8.175	160.526	8.175	90.183	8.175	76.115	8.175	45.2549
8.18	277.934	8.18	164.545	8.18	90.4227	8.18	77.2644	8.18	45.0637
8.185	271.354	8.185	166.151	8.185	89.9525	8.185	76.856	8.185	45.7071
8.19	265.794	8.19	165.119	8.19	86.7751	8.19	78.6865	8.19	44.9332
8.195	266.113	8.195	165.072	8.195	85.7837	8.195	81.2548	8.195	43.0794
8.2	270.235	8.2	163.222	8.2	87.5322	8.2	81.4576	8.2	42.112
8.205	272.882	8.205	162.149	8.205	88.2065	8.205	81.5818	8.205	41.7579
8.21	276.52	8.21	161.909	8.21	89.4252	8.21	80.4152	8.21	41.2912
8.215	278.502	8.215	159.723	8.215	89.8019	8.215	78.3795	8.215	41.109
8.22	281.114	8.22	158.137	8.22	91.7655	8.22	78.0151	8.22	41.5707
8.225	283.118	8.225	157.471	8.225	92.7219	8.225	78.2782	8.225	46.5016
8.23	286.635	8.23	157.281	8.23	93.3252	8.23	78.7568	8.23	49.9542
8.235	293.014	8.235	157.207	8.235	92.9153	8.235	80.9061	8.235	51.3163
8.24	292.38	8.24	158.537	8.24	90.5031	8.24	83.8117	8.24	52.0157
8.245	290.102	8.245	159.564	8.245	88.9661	8.245	85.7898	8.245	50.6862
8.25	285.844	8.25	162.719	8.25	88.7187	8.25	85.9812	8.25	48.0827
8.255	282.827	8.255	165.372	8.255	87.9533	8.255	83.7324	8.255	46.1639
8.26	278.283	8.26	168.531	8.26	86.9856	8.26	83.3673	8.26	43.8337
8.265	279.743	8.265	170.001	8.265	85.1871	8.265	83.9414	8.265	42.8251
8.27	283.934	8.27	169.087	8.27	85.1868	8.27	83.2737	8.27	44.1154
8.275	288.885	8.275	167.756	8.275	85.4049	8.275	84.002	8.275	44.7467
8.28	294.785	8.28	166.002	8.28	86.2669	8.28	85.8431	8.28	45.542
8.285	295.332	8.285	163.879	8.285	86.3769	8.285	87.0533	8.285	46.692
8.29	290.106	8.29	163.191	8.29	85.388	8.29	87.8017	8.29	44.8709
8.295	284.956	8.295	163.475	8.295	84.7995	8.295	89.1042	8.295	46.1602
8.3	279.238	8.3	164.997	8.3	83.8127	8.3	88.3807	8.3	46.673
8.305	278.304	8.305	166.38	8.305	85.0085	8.305	87.6895	8.305	45.6366
8.31	279.377	8.31	167.431	8.31	86.1903	8.31	86.6454	8.31	44.4838
8.315	282.954	8.315	168.21	8.315	88.2487	8.315	85.1852	8.315	43.0843
8.32	287.802	8.32	167.456	8.32	91.0651	8.32	83.7217	8.32	41.9865
8.325	294.699	8.325	167.688	8.325	93.8217	8.325	82.2855	8.325	41.602
8.33	298.059	8.33	166.91	8.33	96.2425	8.33	80.8275	8.33	40.7038
8.335	297.366	8.335	163.761	8.335	96.4944	8.335	81.0666	8.335	41.7026
8.34	294.176	8.34	162.512	8.34	96.9736	8.34	82.2883	8.34	42.978
8.345	287.88	8.345	163.397	8.345	97.904	8.345	84.6617	8.345	43.5042
8.35	281.406	8.35	162.544	8.35	98.0501	8.35	86.1712	8.35	42.5578
8.355	277.532	8.355	162.219	8.355	97.8401	8.355	86.6819	8.355	41.188
8.36	276.205	8.36	164.088	8.36	98.1799	8.36	84.3227	8.36	37.5677
8.365	281.783	8.365	164.376	8.365	99.245	8.365	82.0893	8.365	37.9956
8.37	287.009	8.37	167.992	8.37	96.5171	8.37	78.8164	8.37	39.5563
8.375	290.419	8.375	170.618	8.375	94.7685	8.375	77.5937	8.375	42.6209
8.38	291.963	8.38	170.227	8.38	93.5207	8.38	77.0689	8.38	43.4315
8.385	292.611	8.385	170.219	8.385	92.924	8.385	77.225	8.385	44.4243
8.39	293.808	8.39	170.181	8.39	95.7484	8.39	80.2745	8.39	44.5799
8.395	294.644	8.395	172.241	8.395	98.109	8.395	83.812	8.395	44.2279
8.4	291.722	8.4	171.076	8.4	98.5079	8.4	85.0538	8.4	43.941
8.405	286.448	8.405	167.756	8.405	99.7991	8.405	85.6785	8.405	44.3582
8.41	287.801	8.41	165.358	8.41	103.771	8.41	85.9182	8.41	44.6125
8.415	289.758	8.415	166.557	8.415	104.673	8.415	84.4857	8.415	44.5864
8.42	289.696	8.42	167.416	8.42	105.241	8.42	83.729	8.42	44.6394
8.425	291.596	8.425	166.736	8.425	102.535	8.425	84.1971	8.425	45.5539
8.43	294.105	8.43	166.691	8.43	100.648	8.43	81.3658	8.43	45.7358
8.435	296.809	8.435	164.809	8.435	100.984	8.435	79.4061	8.435	46.4672
8.44	297.292	8.44	165.275	8.44	102.111	8.44	78.991	8.44	46.8521
8.445	295.773	8.445	165.551	8.445	102.834	8.445	80.203	8.445	49.5104
8.45	291.688	8.45	165.796	8.45	104.203	8.45	81.3232	8.45	51.502
8.455	289.327	8.455	164.653	8.455	103.873	8.455	80.955	8.455	52.7729
8.46	289.516	8.46	167.55	8.46	106.57	8.46	82.3246	8.46	53.3787
8.465	293.843	8.465	172.843	8.465	109.045	8.465	81.8381	8.465	51.9681
8.47	293.469	8.47	177.673	8.47	109.06	8.47	81.0288	8.47	53.1178
8.475	293.52	8.475	179.351	8.475	107.133	8.475	80.6461	8.475	54.0938
8.48	292.09	8.48	177.961	8.48	108.102	8.48	78.7494	8.48	55.7695
8.485	287.527	8.485	178.323	8.485	105.955	8.485	76.8113	8.485	54.4662
8.49	282.462	8.49	178.442	8.49	104.337	8.49	76.2833	8.49	49.7999
8.495	280.572	8.495	176.013	8.495	101.955	8.495	79.0211	8.495	44.2269
8.5	283.087	8.5	173.311	8.5	99.0241	8.5	80.5883	8.5	40.0223
8.505	288.432	8.505	171.17	8.505	97.2777	8.505	79.5405	8.505	36.3023
8.51	295.021	8.51	170.808	8.51	99.29	8.51	78.1693	8.51	34.31
8.515	297.738	8.515	170.93	8.515	104.435	8.515	77.6551	8.515	35.1466
8.52	299.784	8.52	172.57	8.52	109.076	8.52	76.5879	8.52	38.8034
8.525	302.108	8.525	172.423	8.525	110.299	8.525	74.8729	8.525	42.2748
8.53	302.34	8.53	173.092	8.53	111.405	8.53	75.2179	8.53	46.5227
8.535	301.75	8.535	174.317	8.535	113.725	8.535	75.4672	8.535	47.3766
8.54	300.656	8.54	175.99	8.54	114.564	8.54	76.4063	8.54	48.4565
8.545	300.141	8.545	175.488	8.545	112.904	8.545	78.6965	8.545	48.1693
8.55	299.595	8.55	174.632	8.55	110.825	8.55	79.8228	8.55	46.9657
8.555	300.531	8.555	174.933	8.555	110.677	8.555	79.9168	8.555	47.2201
8.56	302.941	8.56	175.325	8.56	110.377	8.56	80.5361	8.56	46.457
8.565	303.811	8.565	176.365	8.565	110.535	8.565	82.2315	8.565	44.6895
8.57	306.765	8.57	177.697	8.57	109.2	8.57	84.6559	8.57	43.3783
8.575	311.37	8.575	178.868	8.575	107.814	8.575	85.0029	8.575	43.3295
8.58	314.735	8.58	178.893	8.58	105.902	8.58	82.3831	8.58	44.3928
8.585	314.589	8.585	176.964	8.585	107.677	8.585	79.1287	8.585	45.6687
8.59	310.13	8.59	174.332	8.59	108.477	8.59	75.7245	8.59	47.0201
8.595	302.834	8.595	173.3	8.595	107.405	8.595	71.5231	8.595	47.489
8.6	299.707	8.6	173.723	8.6	107.092	8.6	71.297	8.6	48.5039
8.605	296.024	8.605	174.38	8.605	107.318	8.605	72.9221	8.605	49.5222
8.61	294.379	8.61	175.294	8.61	107.35	8.61	75.024	8.61	48.9407
8.615	293.33	8.615	174.708	8.615	107.479	8.615	78.1328	8.615	48.4464
8.62	293.856	8.62	175.2	8.62	106.471	8.62	81.0082	8.62	46.9318
8.625	297.505	8.625	174.041	8.625	107.859	8.625	81.9374	8.625	48.1497
8.63	300.961	8.63	172.55	8.63	109.73	8.63	83.8785	8.63	48.4067
8.635	303.102	8.635	173.203	8.635	112.95	8.635	83.552	8.635	47.8036
8.64	305.815	8.64	176.6	8.64	113.749	8.64	84.6144	8.64	46.8276
8.645	307.601	8.645	182.423	8.645	115.769	8.645	85.8475	8.645	45.9872
8.65	310.448	8.65	184.088	8.65	114.095	8.65	84.7969	8.65	45.7321
8.655	312.764	8.655	182.95	8.655	111.822	8.655	83.4189	8.655	47.2303
8.66	308.982	8.66	177.679	8.66	110.127	8.66	81.7183	8.66	46.0051
8.665	298.166	8.665	174.261	8.665	106.728	8.665	78.9663	8.665	44.6204
8.67	294.959	8.67	173.076	8.67	104.634	8.67	77.2113	8.67	43.592
8.675	294.067	8.675	172.301	8.675	106.566	8.675	78.1303	8.675	44.4148
8.68	294.37	8.68	174.124	8.68	110.026	8.68	80.9686	8.68	43.8913
8.685	295.645	8.685	179.218	8.685	111.925	8.685	84.5031	8.685	43.517
8.69	298.536	8.69	182.155	8.69	114.407	8.69	87.3321	8.69	45.2057
8.695	304.69	8.695	184.128	8.695	114.712	8.695	89.9122	8.695	47.7821
8.7	310.094	8.7	185.385	8.7	115.347	8.7	89.6681	8.7	49.7597
8.705	312.641	8.705	183.728	8.705	115.083	8.705	88.1237	8.705	52.0843
8.71	312.762	8.71	182.224	8.71	112.109	8.71	86.3868	8.71	52.7872
8.715	310.029	8.715	185.031	8.715	109.878	8.715	83.7524	8.715	51.5161
8.72	309.537	8.72	185.088	8.72	107.335	8.72	81.845	8.72	50.1708
8.725	308.562	8.725	185.466	8.725	106.445	8.725	80.9565	8.725	50.2815
8.73	308.546	8.73	184.611	8.73	109.031	8.73	83.5769	8.73	48.3664
8.735	306.454	8.735	183	8.735	110.813	8.735	84.9374	8.735	46.2752
8.74	306.475	8.74	182.824	8.74	110.55	8.74	84.7348	8.74	47.0351
8.745	307.514	8.745	181.347	8.745	114.687	8.745	83.2143	8.745	46.9311
8.75	308.138	8.75	180.529	8.75	119.617	8.75	80.9318	8.75	46.3053
8.755	307.882	8.755	183.639	8.755	121.866	8.755	79.5241	8.755	46.4342
8.76	305.155	8.76	183.133	8.76	122.574	8.76	78.3328	8.76	47.7424
8.765	301.964	8.765	183.073	8.765	121.246	8.765	81.6642	8.765	48.6781
8.77	300.94	8.77	183.785	8.77	118.654	8.77	83.0505	8.77	48.7249
8.775	300.516	8.775	183.506	8.775	117.381	8.775	85.0007	8.775	48.7354
8.78	302.023	8.78	182.774	8.78	117.469	8.78	87.8211	8.78	48.1972
8.785	305.9	8.785	183.231	8.785	118.613	8.785	89.1234	8.785	46.7016
8.79	309.305	8.79	180.062	8.79	118.885	8.79	88.0858	8.79	46.5706
8.795	314.09	8.795	178.118	8.795	120.915	8.795	84.2501	8.795	47.4114
8.8	317.297	8.8	179.801	8.8	123.472	8.8	82.145	8.8	48.7053
8.805	317.862	8.805	182.165	8.805	125.73	8.805	79.4794	8.805	49.44
8.81	320.973	8.81	182.966	8.81	123.703	8.81	79.9774	8.81	52.0537
8.815	320.87	8.815	184.565	8.815	122.417	8.815	80.6568	8.815	51.7626
8.82	319.031	8.82	186.895	8.82	121.747	8.82	81.8592	8.82	49.8016
8.825	318.538	8.825	186.419	8.825	121.368	8.825	82.9909	8.825	50.7798
8.83	317.695	8.83	185.042	8.83	122.454	8.83	83.1622	8.83	50.2577
8.835	316.51	8.835	182.045	8.835	125.916	8.835	85.2754	8.835	51.518
8.84	312.167	8.84	181.781	8.84	126.24	8.84	84.8794	8.84	53.3812
8.845	306.34	8.845	183.278	8.845	123.536	8.845	85.0394	8.845	54.41
8.85	300.741	8.85	185.221	8.85	122.61	8.85	85.3204	8.85	55.8477
8.855	300.566	8.855	187.015	8.855	122.033	8.855	87.3289	8.855	55.6203
8.86	302.752	8.86	186.194	8.86	119.693	8.86	88.0807	8.86	53.0454
8.865	312.688	8.865	184.587	8.865	120.828	8.865	88.9318	8.865	48.777
8.87	320.85	8.87	183.83	8.87	122.435	8.87	89.6497	8.87	45.8389
8.875	325.403	8.875	183.064	8.875	125.741	8.875	89.109	8.875	42.2594
8.88	328.085	8.88	182.303	8.88	127.308	8.88	88.458	8.88	41.5956
8.885	324.244	8.885	183.046	8.885	127.121	8.885	87.1976	8.885	39.5348
8.89	316.585	8.89	184.617	8.89	127.114	8.89	87.0886	8.89	38.9888
8.895	308.604	8.895	183.356	8.895	124.13	8.895	88.0539	8.895	40.729
8.9	300.084	8.9	181.889	8.9	122.73	8.9	89.8107	8.9	42.2068
8.905	299.822	8.905	175.815	8.905	123.326	8.905	91.1583	8.905	43.0686
8.91	299.489	8.91	171.703	8.91	125.378	8.91	90.9782	8.91	44.7291
8.915	301.602	8.915	169.637	8.915	124.717	8.915	90.4219	8.915	44.9021
8.92	300.934	8.92	168.945	8.92	128.935	8.92	88.9713	8.92	45.3043
8.925	300.103	8.925	168.851	8.925	130.747	8.925	89.8019	8.925	46.1306
8.93	296.964	8.93	170.079	8.93	130.393	8.93	88.433	8.93	46.391
8.935	297.209	8.935	169.919	8.935	130.799	8.935	87.8426	8.935	46.0324
8.94	298.314	8.94	170.913	8.94	130.019	8.94	89.3502	8.94	46.659
8.945	299.837	8.945	169.789	8.945	129.447	8.945	90.5725	8.945	47.4887
8.95	301.272	8.95	170.804	8.95	127.909	8.95	92.3079	8.95	49.2552
8.955	306.226	8.955	169.941	8.955	126.743	8.955	90.6607	8.955	49.2995
8.96	313.77	8.96	170.231	8.96	124.643	8.96	89.5879	8.96	50.0875
8.965	322.393	8.965	170.829	8.965	123.867	8.965	87.8107	8.965	50.021
8.97	326.505	8.97	172.938	8.97	123.815	8.97	86.3838	8.97	50.1009
8.975	330.953	8.975	172.582	8.975	125.005	8.975	85.7864	8.975	49.5436
8.98	332.585	8.98	171.81	8.98	125.532	8.98	85.8386	8.98	49.3893
8.985	333.488	8.985	171.203	8.985	124.549	8.985	85.7913	8.985	48.165
8.99	330.722	8.99	172.216	8.99	127.212	8.99	86.2781	8.99	47.1961
8.995	328.545	8.995	173.077	8.995	127.399	8.995	86.2872	8.995	46.7089
9	324.092	9	174.285	9	126.742	9	85.0265	9	47.6723
9.005	318.239	9.005	174.094	9.005	125.841	9.005	84.5119	9.005	48.6097
9.01	314.482	9.01	175.361	9.01	123.67	9.01	87.1252	9.01	48.7645
9.015	310.08	9.015	175.983	9.015	121.743	9.015	87.5614	9.015	49.8029
9.02	304.874	9.02	175.417	9.02	121.5	9.02	89.8201	9.02	50.153
9.025	302.265	9.025	172.759	9.025	122.659	9.025	91.3057	9.025	50.3481
9.03	301.981	9.03	169.439	9.03	121.352	9.03	92.9205	9.03	50.4417
9.035	304.134	9.035	166.265	9.035	122.361	9.035	91.607	9.035	50.1489
9.04	307.776	9.04	164.196	9.04	121.034	9.04	89.5721	9.04	49.7473
9.045	309.47	9.045	162.915	9.045	122.065	9.045	85.8213	9.045	48.413
9.05	313.269	9.05	163.454	9.05	120.811	9.05	82.5124	9.05	48.4301
9.055	314.678	9.055	165.787	9.055	118.379	9.055	82.5673	9.055	48.284
9.06	313.774	9.06	168.846	9.06	118.974	9.06	84.2959	9.06	49.0682
9.065	315.892	9.065	171.961	9.065	119.331	9.065	85.7785	9.065	49.3856
9.07	321.085	9.07	174.075	9.07	120.952	9.07	87.4911	9.07	49.9451
9.075	324.53	9.075	173.764	9.075	123.256	9.075	90.4847	9.075	48.6783
9.08	326.72	9.08	172.559	9.08	124.395	9.08	95.1063	9.08	47.4515
9.085	325.169	9.085	170.848	9.085	125.236	9.085	96.4014	9.085	47.7517
9.09	323.67	9.09	168.182	9.09	127.398	9.09	96.9234	9.09	47.554
9.095	319.547	9.095	167.081	9.095	128.512	9.095	96.6254	9.095	46.5994
9.1	309.727	9.1	167.741	9.1	127.829	9.1	95.0028	9.1	46.5916
9.105	299.823	9.105	169.742	9.105	128.538	9.105	93.3879	9.105	46.5964
9.11	290.168	9.11	172.086	9.11	125.988	9.11	91.9146	9.11	46.8048
9.115	282.736	9.115	172.636	9.115	126.757	9.115	91.6151	9.115	45.6232
9.12	282.195	9.12	172.985	9.12	127.03	9.12	90.5543	9.12	44.7786
9.125	285.526	9.125	172.885	9.125	127.073	9.125	89.1251	9.125	44.2272
9.13	294.41	9.13	172.036	9.13	128.017	9.13	89.0511	9.13	44.7399
9.135	302.419	9.135	172.252	9.135	129.31	9.135	89.836	9.135	46.926
9.14	309.075	9.14	171.079	9.14	130.07	9.14	90.6674	9.14	48.0989
9.145	315.323	9.145	170.278	9.145	130.414	9.145	91.2677	9.145	46.9804
9.15	313.264	9.15	170.363	9.15	130.257	9.15	91.7174	9.15	44.3577
9.155	309.739	9.155	172.692	9.155	128.993	9.155	92.0149	9.155	43.3081
9.16	309.426	9.16	174.957	9.16	129.35	9.16	91.9869	9.16	42.2458
9.165	308.536	9.165	176.504	9.165	130.99	9.165	90.2516	9.165	42.9045
9.17	307.341	9.17	177.262	9.17	131.179	9.17	87.9065	9.17	44.1064
9.175	307.875	9.175	177.864	9.175	132.141	9.175	87.7475	9.175	46.6962
9.18	308.606	9.18	177.577	9.18	129.234	9.18	87.9885	9.18	46.0213
9.185	308.471	9.185	175.862	9.185	128.442	9.185	91.2928	9.185	45.1568
9.19	305.074	9.19	173.936	9.19	128.044	9.19	93.6844	9.19	43.7483
9.195	302.736	9.195	172.926	9.195	129.339	9.195	93.6156	9.195	41.8098
9.2	305.112	9.2	174.062	9.2	129.672	9.2	94.094	9.2	40.7816
9.205	306.374	9.205	176.01	9.205	129.434	9.205	93.6506	9.205	42.8794
9.21	306.765	9.21	178.687	9.21	128.009	9.21	94.6095	9.21	45.2795
9.215	310.296	9.215	181.638	9.215	127.22	9.215	95.5065	9.215	47.306
9.22	310.579	9.22	183.345	9.22	126.879	9.22	97.5129	9.22	48.2945
9.225	313.864	9.225	184.384	9.225	124.979	9.225	101.25	9.225	47.8329
9.23	316.418	9.23	183.476	9.23	124.102	9.23	102.526	9.23	46.1446
9.235	320.982	9.235	183.022	9.235	125.89	9.235	103.056	9.235	45.4321
9.24	325.733	9.24	180.622	9.24	126.364	9.24	102.657	9.24	44.2702
9.245	327.921	9.245	176.795	9.245	126.568	9.245	99.2242	9.245	44.5457
9.25	325.592	9.25	174.064	9.25	125.817	9.25	96.6261	9.25	44.1228
9.255	322.447	9.255	173.734	9.255	126.676	9.255	95.9319	9.255	45.8513
9.26	315.706	9.26	172.405	9.26	125.587	9.26	96.3274	9.26	49.7928
9.265	313.278	9.265	172.585	9.265	128.6	9.265	99.1269	9.265	52.276
9.27	315.346	9.27	173.043	9.27	130.533	9.27	102.438	9.27	53.9107
9.275	320.588	9.275	170.894	9.275	132.49	9.275	103.25	9.275	55.1047
9.28	324.764	9.28	169.424	9.28	133.289	9.28	104.612	9.28	55.2415
9.285	329.578	9.285	167.752	9.285	132.345	9.285	105.199	9.285	54.0232
9.29	332.581	9.29	168.614	9.29	130.512	9.29	107.157	9.29	51.9877
9.295	334.425	9.295	169.049	9.295	128.475	9.295	106.484	9.295	49.1729
9.3	330.292	9.3	171.339	9.3	127.107	9.3	104.443	9.3	46.5839
9.305	327.987	9.305	175.425	9.305	126.422	9.305	105.242	9.305	46.2113
9.31	325.071	9.31	176.02	9.31	125.828	9.31	109.161	9.31	46.3877
9.315	326.444	9.315	173.484	9.315	126.283	9.315	110.715	9.315	46.5516
9.32	324.525	9.32	169.954	9.32	128.149	9.32	111.838	9.32	47.4069
9.325	328.603	9.325	169.504	9.325	129.835	9.325	111.153	9.325	47.5566
9.33	333.088	9.33	166.935	9.33	129.143	9.33	108.524	9.33	48.0177
9.335	333.489	9.335	166.72	9.335	129.209	9.335	107.247	9.335	47.7649
9.34	331.704	9.34	168.296	9.34	128.794	9.34	106.674	9.34	47.0465
9.345	327.357	9.345	170.409	9.345	128.561	9.345	105.602	9.345	47.7607
9.35	321.952	9.35	173.449	9.35	128.632	9.35	106.317	9.35	48.073
9.355	320.719	9.355	174.135	9.355	128.077	9.355	106.159	9.355	47.3044
9.36	316.136	9.36	177.612	9.36	129.088	9.36	110.046	9.36	47.8265
9.365	310.933	9.365	177.891	9.365	129.737	9.365	110.328	9.365	47.5877
9.37	307.717	9.37	180.394	9.37	129.935	9.37	109.995	9.37	45.8134
9.375	308.561	9.375	181.522	9.375	128.51	9.375	107.548	9.375	44.9796
9.38	309.563	9.38	181.857	9.38	126.464	9.38	105.173	9.38	44.7884
9.385	313.705	9.385	180.765	9.385	125.249	9.385	103.512	9.385	45.1848
9.39	313.107	9.39	179.193	9.39	125.467	9.39	104.363	9.39	47.0844
9.395	313.46	9.395	180.141	9.395	125.509	9.395	106.487	9.395	49.3436
9.4	317.397	9.4	180.656	9.4	127.114	9.4	107.296	9.4	50.3288
9.405	320.054	9.405	182.027	9.405	127.48	9.405	110.413	9.405	50.4723
9.41	321.853	9.41	182.557	9.41	130.122	9.41	112.079	9.41	48.9916
9.415	321.008	9.415	183.625	9.415	130.992	9.415	112.486	9.415	48.0556
9.42	318.984	9.42	185.432	9.42	131.35	9.42	115.9	9.42	46.3046
9.425	322.331	9.425	184.221	9.425	130.289	9.425	114.679	9.425	44.1772
9.43	327.341	9.43	184.707	9.43	130.055	9.43	113.216	9.43	43.7044
9.435	330.336	9.435	183.057	9.435	129.263	9.435	111.284	9.435	43.8006
9.44	331.141	9.44	183.683	9.44	126.806	9.44	109.065	9.44	45.2643
9.445	331.921	9.445	184.86	9.445	125.507	9.445	108.248	9.445	47.289
9.45	333.376	9.45	185.517	9.45	124.113	9.45	108.075	9.45	49.3975
9.455	333.838	9.455	184.811	9.455	126.328	9.455	108.434	9.455	50.6242
9.46	332.03	9.46	182.312	9.46	128.493	9.46	110.959	9.46	51.8032
9.465	330.081	9.465	179.245	9.465	129.005	9.465	115.098	9.465	52.755
9.47	330.071	9.47	179.848	9.47	129.644	9.47	116.078	9.47	50.1466
9.475	329.098	9.475	180.308	9.475	130.396	9.475	119.466	9.475	48.8706
9.48	324.774	9.48	181.392	9.48	131.896	9.48	120.711	9.48	46.5894
9.485	320.695	9.485	182.718	9.485	131.003	9.485	120.538	9.485	44.2947
9.49	317.68	9.49	185.43	9.49	129.694	9.49	123.292	9.49	43.411
9.495	316.619	9.495	186.443	9.495	128.486	9.495	124.576	9.495	44.5757
9.5	317.669	9.5	187.176	9.5	127.962	9.5	123.69	9.5	45.7008
9.505	318.515	9.505	184.979	9.505	128.021	9.505	124.374	9.505	47.4335
9.51	320.103	9.51	184.379	9.51	128.055	9.51	122.802	9.51	47.3593
9.515	320.137	9.515	186.724	9.515	127.448	9.515	120.9	9.515	46.2826
9.52	328.341	9.52	186.948	9.52	125.246	9.52	120.1	9.52	46.1633
9.525	329.603	9.525	188.44	9.525	124.662	9.525	119.682	9.525	44.8279
9.53	325.632	9.53	189.568	9.53	124.612	9.53	119.477	9.53	43.8004
9.535	319.796	9.535	189.39	9.535	123.66	9.535	117.668	9.535	42.9875
9.54	317.857	9.54	190.219	9.54	121.501	9.54	116.254	9.54	41.5921
9.545	315.663	9.545	189.902	9.545	120.116	9.545	117.296	9.545	43.6454
9.55	314.618	9.55	190.733	9.55	120.163	9.55	118.292	9.55	46.6887
9.555	311.026	9.555	191.149	9.555	121.796	9.555	118.28	9.555	47.5479
9.56	310.263	9.56	193.171	9.56	122.639	9.56	118.182	9.56	46.5254
9.565	312.781	9.565	193.798	9.565	123.359	9.565	120.835	9.565	44.3365
9.57	313.997	9.57	195.653	9.57	125.398	9.57	120.963	9.57	42.7208
9.575	316.639	9.575	195.253	9.575	125.073	9.575	123.436	9.575	44.464
9.58	319.248	9.58	193.818	9.58	125.702	9.58	123.902	9.58	44.5789
9.585	316.104	9.585	194.17	9.585	124.247	9.585	122.592	9.585	42.4392
9.59	320.326	9.59	193.964	9.59	123.179	9.59	123.068	9.59	42.8772
9.595	320.53	9.595	191.62	9.595	122.767	9.595	124.56	9.595	43.9608
9.6	321.969	9.6	190.318	9.6	121.598	9.6	127.438	9.6	44.6231
9.605	321.742	9.605	191.039	9.605	120.305	9.605	126.882	9.605	44.9588
9.61	321.651	9.61	193.027	9.61	118.58	9.61	126.9	9.61	44.053
9.615	320.333	9.615	196.062	9.615	118.532	9.615	127.169	9.615	43.2087
9.62	321.863	9.62	197.238	9.62	119.824	9.62	127.449	9.62	45.4338
9.625	319.412	9.625	197.59	9.625	121.005	9.625	126.071	9.625	46.8125
9.63	322.165	9.63	196.835	9.63	122.671	9.63	122.079	9.63	44.8036
9.635	324.077	9.635	194.192	9.635	124.652	9.635	119.024	9.635	40.8386
9.64	323.219	9.64	195.223	9.64	127.755	9.64	117.876	9.64	38.8982
9.645	324.615	9.645	196.539	9.645	129.376	9.645	118.995	9.645	40.0292
9.65	327.326	9.65	195.62	9.65	130.38	9.65	121.737	9.65	41.7768
9.655	324.179	9.655	197.14	9.655	129.973	9.655	125.718	9.655	42.8004
9.66	324.237	9.66	199.315	9.66	129.153	9.66	128.678	9.66	45.6325
9.665	324.052	9.665	200.237	9.665	129.629	9.665	129.119	9.665	47.8262
9.67	327.881	9.67	197.187	9.67	130.834	9.67	129.047	9.67	50.6456
9.675	332.771	9.675	195.867	9.675	131.678	9.675	127.367	9.675	52.1024
9.68	336.512	9.68	196.515	9.68	130.733	9.68	125.555	9.68	51.5352
9.685	337.273	9.685	198.45	9.685	131.545	9.685	124.411	9.685	49.4606
9.69	335.364	9.69	198.488	9.69	132.113	9.69	125.273	9.69	48.8079
9.695	332.376	9.695	200.474	9.695	130.403	9.695	126.562	9.695	50.8873
9.7	333.558	9.7	199.795	9.7	129.061	9.7	128.674	9.7	52.5846
9.705	332.884	9.705	197.882	9.705	128.652	9.705	130.3	9.705	51.9878
9.71	331.005	9.71	197.843	9.71	128.076	9.71	134.525	9.71	50.9322
9.715	330.49	9.715	198.002	9.715	126.404	9.715	135.462	9.715	50.8957
9.72	333.808	9.72	195.981	9.72	124.527	9.72	134.965	9.72	49.5415
9.725	333.362	9.725	195.986	9.725	125.316	9.725	134.68	9.725	46.5124
9.73	333.066	9.73	197.148	9.73	124.844	9.73	133.573	9.73	44.8634
9.735	332.543	9.735	199.817	9.735	124.5	9.735	130.227	9.735	43.6403
9.74	333.704	9.74	198.695	9.74	126.074	9.74	126.8	9.74	42.4402
9.745	338.496	9.745	199.393	9.745	127.046	9.745	125.101	9.745	42.0793
9.75	342.188	9.75	199.286	9.75	127.925	9.75	123.821	9.75	45.0718
9.755	340.746	9.755	198.912	9.755	129.745	9.755	123.706	9.755	46.7028
9.76	334.894	9.76	197.192	9.76	129.58	9.76	125.313	9.76	46.4926
9.765	331.918	9.765	199.127	9.765	128.509	9.765	126.303	9.765	46.3306
9.77	330.832	9.77	199.16	9.77	126.179	9.77	126.875	9.77	47.4494
9.775	333.688	9.775	199.936	9.775	125.848	9.775	125.954	9.775	48.2232
9.78	336.981	9.78	200.739	9.78	126.91	9.78	128.56	9.78	47.8558
9.785	338.711	9.785	200.79	9.785	126.577	9.785	129.219	9.785	50.1558
9.79	342.424	9.79	197.264	9.79	126.968	9.79	128.96	9.79	50.475
9.795	344.308	9.795	196.081	9.795	129.132	9.795	128.211	9.795	48.3095
9.8	343.503	9.8	193.693	9.8	130.708	9.8	128.227	9.8	47.2068
9.805	340.413	9.805	191.743	9.805	130.881	9.805	129.901	9.805	48.5607
9.81	335.486	9.81	190.573	9.81	131.622	9.81	128.932	9.81	47.2259
9.815	335.691	9.815	193.801	9.815	130.69	9.815	130.699	9.815	45.3371
9.82	334.691	9.82	196.192	9.82	130.313	9.82	132.936	9.82	46.5885
9.825	334.122	9.825	198.693	9.825	131.259	9.825	133.369	9.825	47.0276
9.83	331.182	9.83	199.63	9.83	131.988	9.83	133.245	9.83	48.1084
9.835	330.104	9.835	200.575	9.835	132.426	9.835	131.146	9.835	48.5097
9.84	326.905	9.84	201.26	9.84	130.666	9.84	130.48	9.84	50.0542
9.845	325.142	9.845	202.019	9.845	129.151	9.845	128.594	9.845	48.3492
9.85	326.239	9.85	201.972	9.85	128.208	9.85	127.48	9.85	46.5903
9.855	326.003	9.855	200.1	9.855	126.74	9.855	125.437	9.855	46.0758
9.86	328.518	9.86	199.265	9.86	126.979	9.86	126.373	9.86	45.8578
9.865	330.628	9.865	201.547	9.865	127.711	9.865	126.649	9.865	45.7095
9.87	332.203	9.87	203.215	9.87	128.804	9.87	126.903	9.87	46.3485
9.875	333.77	9.875	205.016	9.875	127.271	9.875	131.633	9.875	47.3264
9.88	332.697	9.88	206.439	9.88	129.19	9.88	132.933	9.88	47.7108
9.885	333.078	9.885	207.589	9.885	129.084	9.885	135.212	9.885	48.3105
9.89	334.144	9.89	207.693	9.89	128.937	9.89	135.821	9.89	48.8981
9.895	335.857	9.895	206.269	9.895	129.361	9.895	135.383	9.895	48.1178
9.9	338.779	9.9	202.887	9.9	128.489	9.9	134.505	9.9	47.098
9.905	343.744	9.905	198.397	9.905	127.734	9.905	129.498	9.905	45.9381
9.91	347.064	9.91	195.49	9.91	127.313	9.91	127.733	9.91	46.4628
9.915	347.027	9.915	195.172	9.915	127.843	9.915	128.534	9.915	46.4797
9.92	347.157	9.92	196.025	9.92	127.133	9.92	128.514	9.92	48.564
9.925	345.972	9.925	197.472	9.925	125.162	9.925	128.707	9.925	49.0342
9.93	344.724	9.93	200.15	9.93	126.245	9.93	129.717	9.93	47.4798
9.935	342.325	9.935	201.925	9.935	128.243	9.935	129.565	9.935	47.785
9.94	341.645	9.94	203.277	9.94	128.719	9.94	129.451	9.94	49.5095
9.945	344.692	9.945	203.705	9.945	125.794	9.945	129.75	9.945	48.17
9.95	349.273	9.95	202.435	9.95	125.192	9.95	131.76	9.95	46.3485
9.955	353.24	9.955	202.092	9.955	123.068	9.955	133.969	9.955	45.8495
9.96	355.918	9.96	201.874	9.96	124.588	9.96	134.942	9.96	45.5727
9.965	353.877	9.965	202.488	9.965	127.663	9.965	134.671	9.965	46.5836
9.97	348.65	9.97	203.771	9.97	129.724	9.97	135.298	9.97	47.2145
9.975	342.904	9.975	205.748	9.975	130.506	9.975	132.77	9.975	47.9051
9.98	340.682	9.98	208.025	9.98	130.808	9.98	130.726	9.98	47.6657
9.985	338.901	9.985	209.963	9.985	130.455	9.985	130.906	9.985	48.0313
9.99	336.048	9.99	212.074	9.99	129.187	9.99	130.114	9.99	49.4836
[truncated: 35,513 more rows]

## Sheet: Fig5b_KMtest
StepD_rS50_B9_1p2G_Hist.x	StepD_rS50_B9_1p2G_Hist.d	StepD_rS100uM_11B_3G_Hist.x	StepD_rS100uM_11B_3G_Hist.d	StepD_rS200uM_19B_0p9G_Hist.x	StepD_rS200uM_19B_0p9G_Hist.d	StepD_rS500uM_41B_1p5G_Hist.x	StepD_rS500uM_41B_1p5G_Hist.d
-14.75	0	-14.75	0.00133289	-14.75	0.00221976	-14.75	0
-14.25	0.00142755	-14.25	0.000666445	-14.25	0	-14.25	0.00133245
-13.75	0.0028551	-13.75	0.000666445	-13.75	0.00221976	-13.75	0.00133245
-13.25	0.00142755	-13.25	0.000666445	-13.25	0.00443951	-13.25	0
-12.75	0	-12.75	0.00133289	-12.75	0	-12.75	0
-12.25	0.00142755	-12.25	0	-12.25	0.00887902	-12.25	0
-11.75	0	-11.75	0.000666445	-11.75	0.00221976	-11.75	0.00266489
-11.25	0.00142755	-11.25	0.000666445	-11.25	0.00221976	-11.25	0.00399734
-10.75	0	-10.75	0.00199933	-10.75	0	-10.75	0.00266489
-10.25	0.00142755	-10.25	0	-10.25	0.00221976	-10.25	0.00666223
-9.75	0.00142755	-9.75	0.000666445	-9.75	0.00221976	-9.75	0.00932712
-9.25	0.00571021	-9.25	0.00199933	-9.25	0.00221976	-9.25	0.00399734
-8.75	0	-8.75	0.00133289	-8.75	0.00443951	-8.75	0.00932712
-8.25	0.00142755	-8.25	0.00333222	-8.25	0.00887902	-8.25	0.00399734
-7.75	0.00142755	-7.75	0.00266578	-7.75	0.00665927	-7.75	0.00799467
-7.25	0.00856531	-7.25	0.00333222	-7.25	0.00221976	-7.25	0.0173218
-6.75	0.00428266	-6.75	0.00466511	-6.75	0.00443951	-6.75	0.0159893
-6.25	0.00142755	-6.25	0.00399867	-6.25	0.00665927	-6.25	0.0186542
-5.75	0	-5.75	0.00333222	-5.75	0.00221976	-5.75	0.0173218
-5.25	0	-5.25	0.00733089	-5.25	0.00443951	-5.25	0.0173218
-4.75	0.00142755	-4.75	0.005998	-4.75	0.0133185	-4.75	0.0226516
-4.25	0.0028551	-4.25	0.00533156	-4.25	0.017758	-4.25	0.023984
-3.75	0	-3.75	0.00999667	-3.75	0.0110988	-3.75	0.0279813
-3.25	0.0028551	-3.25	0.00533156	-3.25	0.0244173	-3.25	0.0159893
-2.75	0.0028551	-2.75	0.00533156	-2.75	0.0133185	-2.75	0.023984
-2.25	0	-2.25	0.00533156	-2.25	0	-2.25	0.0159893
-1.75	0	-1.75	0.00333222	-1.75	0.0133185	-1.75	0.00799467
-1.25	0.00571021	-1.25	0.00533156	-1.25	0.00443951	-1.25	0.00532978
-0.75	0.0028551	-0.75	0.00466511	-0.75	0.0110988	-0.75	0.011992
-0.25	0.00856531	-0.25	0.00733089	-0.25	0.00443951	-0.25	0
0.25	0.00713776	0.25	0.00866378	0.25	0.0199778	0.25	0.00266489
0.75	0.00142755	0.75	0.00466511	0.75	0.00443951	0.75	0.0146569
1.25	0.00428266	1.25	0.00399867	1.25	0.0110988	1.25	0.0146569
1.75	0	1.75	0.00133289	1.75	0.0110988	1.75	0.0266489
2.25	0.00571021	2.25	0.00666445	2.25	0.0133185	2.25	0.0572951
2.75	0.00428266	2.75	0.0146618	2.75	0.0510544	2.75	0.071952
3.25	0.0171306	3.25	0.023992	3.25	0.0488346	3.25	0.107928
3.75	0.00999286	3.75	0.0266578	3.75	0.0510544	3.75	0.11992
4.25	0.0299786	4.25	0.035988	4.25	0.082131	4.25	0.113258
4.75	0.0342612	4.75	0.041986	4.75	0.0843507	4.75	0.151899
5.25	0.0428266	5.25	0.0646451	5.25	0.0954495	5.25	0.149234
5.75	0.054247	5.75	0.077974	5.75	0.0799112	5.75	0.129247
6.25	0.0499643	6.25	0.1013	6.25	0.144284	6.25	0.110593
6.75	0.0628123	6.75	0.105298	6.75	0.126526	6.75	0.102598
7.25	0.0728051	7.25	0.115295	7.25	0.155383	7.25	0.0892738
7.75	0.109921	7.75	0.123959	7.75	0.099889	7.75	0.0639574
8.25	0.107066	8.25	0.123292	8.25	0.099889	8.25	0.0639574
8.75	0.107066	8.75	0.103299	8.75	0.0732519	8.75	0.0306462
9.25	0.121342	9.25	0.1013	9.25	0.0754717	9.25	0.0213191
9.75	0.0985011	9.75	0.103299	9.75	0.0577137	9.75	0.0173218
10.25	0.125625	10.25	0.0913029	10.25	0.0488346	10.25	0.0226516
10.75	0.114204	10.75	0.065978	10.75	0.0399556	10.75	0.00666223
11.25	0.105639	11.25	0.0646451	11.25	0.0332963	11.25	0.00266489
11.75	0.0913633	11.75	0.0733089	11.75	0.0332963	11.75	0.00133245
12.25	0.082798	12.25	0.0546485	12.25	0.0155383	12.25	0.00266489
12.75	0.0642398	12.75	0.0499833	12.75	0.00887902	12.75	0.00399734
13.25	0.0670949	13.25	0.0273242	13.25	0.0199778	13.25	0.00133245
13.75	0.054247	13.75	0.0326558	13.75	0.0110988	13.75	0
14.25	0.0256959	14.25	0.0193269	14.25	0.00887902	14.25	0
14.75	0.0199857	14.75	0.0126624	14.75	0.00443951	14.75	0.00133245
15.25	0.028551	15.25	0.00999667	15.25	0.00221976	15.25	0
15.75	0.0214133	15.75	0.0106631	15.75	0.00443951	15.75	0
16.25	0.0171306	16.25	0.00666445	16.25	0	16.25	0
16.75	0.00428266	16.75	0.00133289	16.75	0	16.75	0
17.25	0.00999286	17.25	0.00133289	17.25	0.00221976	17.25	0
17.75	0.00428266	17.75	0.00199933	17.75	0	17.75	0
18.25	0.0028551	18.25	0.00133289	18.25	0	18.25	0
18.75	0	18.75	0.00133289	18.75	0	18.75	0
19.25	0.0028551	19.25	0.000666445	19.25	0	19.25	0
19.75	0.00142755	19.75	0.000666445	19.75	0	19.75	0
20.25	0	20.25	0	20.25	0	20.25	0
20.75	0.00142755	20.75	0	20.75	0	20.75	0
21.25	0	21.25	0	21.25	0	21.25	0
21.75	0	21.75	0	21.75	0	21.75	0
22.25	0	22.25	0	22.25	0	22.25	0
22.75	0	22.75	0	22.75	0	22.75	0
23.25	0	23.25	0	23.25	0	23.25	0
23.75	0	23.75	0	23.75	0	23.75	0
24.25	0	24.25	0	24.25	0	24.25	0
24.75	0	24.75	0	24.75	0	24.75	0
25.25	0	25.25	0	25.25	0	25.25	0
25.75	0	25.75	0	25.75	0	25.75	0
26.25	0	26.25	0	26.25	0	26.25	0
26.75	0	26.75	0	26.75	0	26.75	0
27.25	0	27.25	0	27.25	0	27.25	0
27.75	0	27.75	0	27.75	0	27.75	0
28.25	0	28.25	0	28.25	0	28.25	0
28.75	0	28.75	0	28.75	0	28.75	0
29.25	0	29.25	0	29.25	0	29.25	0
29.75	0	29.75	0	29.75	0	29.75	0
30.25	0	30.25	0	30.25	0	30.25	0
30.75	0	30.75	0	30.75	0	30.75	0
31.25	0	31.25	0	31.25	0	31.25	0
31.75	0	31.75	0	31.75	0	31.75	0
32.25	0	32.25	0	32.25	0	32.25	0
32.75	0	32.75	0	32.75	0	32.75	0
33.25	0	33.25	0	33.25	0	33.25	0
33.75	0	33.75	0	33.75	0	33.75	0
34.25	0	34.25	0	34.25	0	34.25	0
34.75	0	34.75	0	34.75	0	34.75	0

## Sheet: Fig5c inset
Trace_5bp	Fit_5bp
251.25	249.849
255	252.12
255	254.39
253.75	255.833
258.75	255.833
258.75	256.629
253.75	257.756
255	258.884
251.25	260.011
260	261.138
262.5	262.266
262.5	263.393
261.25	264.521
263.75	265.034
268.75	265.034
268.75	265.034
266.25	265.034
268.75	265.034
265	265.034
262.5	265.034
260	265.034
260	265.034
265	265.034
270	265.034
266.25	265.034
266.25	265.034
266.25	265.034
265	265.034
266.25	265.034
268.75	265.034
268.75	265.034
266.25	265.034
268.75	265.034
267.5	265.034
266.25	265.034
261.25	265.034
260	265.034
263.75	265.034
267.5	265.034
263.75	265.034
262.5	265.034
265	265.034
261.25	265.034
266.25	265.034
261.25	265.034
266.25	265.878
266.25	266.843
267.5	267.808
267.5	268.773
273.75	269.737
276.25	270.625
272.5	270.625
268.75	270.625
267.5	270.625
273.75	270.625
278.75	270.625
273.75	270.625
262.5	270.625
268.75	270.625
267.5	270.625
266.25	270.625
271.25	270.625
275	270.625
271.25	270.625
273.75	270.625
270	270.625
271.25	270.625
276.25	270.625
271.25	270.625
267.5	270.625
273.75	270.625
273.75	270.625
270	270.625
263.75	270.625
267.5	270.625
268.75	270.625
271.25	270.625
273.75	270.625
268.75	270.625
271.25	270.625
265	270.625
268.75	270.625
275	270.625
271.25	270.625
277.5	270.625
275	270.625
267.5	270.625
272.5	270.625
267.5	270.625
270	270.625
268.75	270.625
268.75	270.625
268.75	270.625
268.75	270.625
270	270.625
270	270.625
265	270.625
272.5	270.625
270	270.625
271.25	270.629
271.25	271.455
271.25	272.282
273.75	273.108
273.75	273.934
280	274.757
275	274.757
275	274.757
273.75	274.757
266.25	274.757
267.5	274.757
273.75	274.757
276.25	274.757
270	274.757
277.5	274.757
275	274.757
276.25	274.757
273.75	274.757
273.75	274.757
272.5	274.757
273.75	274.757
272.5	274.757
270	274.757
273.75	274.757
271.25	274.757
275	274.757
272.5	274.757
276.25	274.757
271.25	274.757
276.25	274.757
270	274.757
272.5	274.757
277.5	274.757
272.5	274.757
273.75	274.757
273.75	274.757
276.25	274.757
275	274.757
276.25	274.757
273.75	274.757
277.5	274.757
277.5	274.757
275	274.757
282.5	274.757
276.25	274.757
276.25	274.757
277.5	274.757
271.25	274.757
272.5	274.757
271.25	274.757
275	274.757
276.25	274.757
277.5	274.757
278.75	274.757
280	274.757
275	274.757
272.5	274.757
272.5	274.757
272.5	274.757
277.5	274.757
270	274.757
278.75	274.757
271.25	274.757
268.75	274.757
276.25	274.757
277.5	274.757
276.25	274.757
276.25	274.757
275	274.757
277.5	274.757

## Sheet: Fig5c_StepsizevsATPrS
ATPrS	TTest_mean	TTest_SD	KM_mean	KM_SD
0	11.4	2.9	11.2	4.5
50	7.4	2.9	9.7	4.2
100	7.2	3	8.4	4.1
200	5.9	4.9	6.8	3.5
500	5.3	4.2	5.2	2.9

## Sheet: Fig5D_Rate and Pause vs ATPrs
ATPrS.d	Rate_ATPrS_ex.d	Rate_ATPrS_ex_sd.d	PauseTn.d	PauseT_sdn.d	GFit_Rate_ATPrS_ex.x	GFit_Rate_ATPrS_ex.d	GFit_PauseTn.x	GFit_PauseTn.d
0	43.3	0.7	0.140449	0.00504987	0	43.4783	0	0.14
50	28.2863	1.34	0.270423	0.0141473	2.51256	41.935	2.51256	0.144232
100	19.603	1.38	0.359905	0.0146096	5.02513	40.4975	5.02513	0.148465
200	11.1344	0.32	0.490292	0.0298445	7.53769	39.1553	7.53769	0.152698
500	4.43	0.34	1.2764	0.07353	10.0503	37.8991	10.0503	0.156932
					12.5628	36.7211	12.5628	0.161166
					15.0754	35.6141	15.0754	0.165402
					17.5879	34.5719	17.5879	0.169639
					20.1005	33.589	20.1005	0.173878
					22.6131	32.6604	22.6131	0.178119
					25.1256	31.7818	25.1256	0.182361
					27.6382	30.9493	27.6382	0.186606
					30.1508	30.1592	30.1508	0.190854
					32.6633	29.4085	32.6633	0.195104
					35.1759	28.6943	35.1759	0.199357
					37.6884	28.014	37.6884	0.203614
					40.201	27.3652	40.201	0.207874
					42.7136	26.7458	42.7136	0.212137
					45.2261	26.1539	45.2261	0.216405
					47.7387	25.5876	47.7387	0.220677
					50.2513	25.0453	50.2513	0.224953
					52.7638	24.5256	52.7638	0.229234
					55.2764	24.027	55.2764	0.23352
					57.7889	23.5483	57.7889	0.237811
					60.3015	23.0884	60.3015	0.242108
					62.8141	22.6461	62.8141	0.24641
					65.3266	22.2204	65.3266	0.250718
					67.8392	21.8105	67.8392	0.255033
					70.3518	21.4155	70.3518	0.259354
					72.8643	21.0345	72.8643	0.263682
					75.3769	20.6669	75.3769	0.268017
					77.8894	20.312	77.8894	0.272359
					80.402	19.969	80.402	0.276708
					82.9146	19.6375	82.9146	0.281066
					85.4271	19.3169	85.4271	0.285431
					87.9397	19.0065	87.9397	0.289806
					90.4523	18.7061	90.4523	0.294188
					92.9648	18.415	92.9648	0.29858
					95.4774	18.1328	95.4774	0.302981
					97.9899	17.8592	97.9899	0.307391
					100.503	17.5938	100.503	0.311812
					103.015	17.3362	103.015	0.316242
					105.528	17.086	105.528	0.320683
					108.04	16.843	108.04	0.325135
					110.553	16.6069	110.553	0.329597
					113.065	16.3773	113.065	0.334071
					115.578	16.154	115.578	0.338557
					118.09	15.9367	118.09	0.343054
					120.603	15.7252	120.603	0.347564
					123.116	15.5193	123.116	0.352086
					125.628	15.3188	125.628	0.356621
					128.141	15.1234	128.141	0.361169
					130.653	14.933	130.653	0.365731
					133.166	14.7473	133.166	0.370306
					135.678	14.5662	135.678	0.374896
					138.191	14.3896	138.191	0.3795
					140.704	14.2172	140.704	0.384119
					143.216	14.0489	143.216	0.388753
					145.729	13.8846	145.729	0.393403
					148.241	13.7241	148.241	0.398068
					150.754	13.5674	150.754	0.40275
					153.266	13.4142	153.266	0.407448
					155.779	13.2644	155.779	0.412163
					158.291	13.118	158.291	0.416895
					160.804	12.9748	160.804	0.421645
					163.317	12.8348	163.317	0.426412
					165.829	12.6977	165.829	0.431198
					168.342	12.5636	168.342	0.436003
					170.854	12.4324	170.854	0.440826
					173.367	12.3039	173.367	0.445669
					175.879	12.178	175.879	0.450532
					178.392	12.0547	178.392	0.455415
					180.905	11.9339	180.905	0.460318
					183.417	11.8156	183.417	0.465242
					185.93	11.6996	185.93	0.470188
					188.442	11.5859	188.442	0.475155
					190.955	11.4744	190.955	0.480144
					193.467	11.3651	193.467	0.485156
					195.98	11.2579	195.98	0.49019
					198.492	11.1527	198.492	0.495248
					201.005	11.0495	201.005	0.50033
					203.518	10.9482	203.518	0.505436
					206.03	10.8488	206.03	0.510566
					208.543	10.7512	208.543	0.515721
					211.055	10.6553	211.055	0.520901
					213.568	10.5612	213.568	0.526108
					216.08	10.4688	216.08	0.53134
					218.593	10.378	218.593	0.5366
					221.106	10.2888	221.106	0.541886
					223.618	10.2012	223.618	0.5472
					226.131	10.1151	226.131	0.552542
					228.643	10.0304	228.643	0.557912
					231.156	9.94722	231.156	0.563312
					233.668	9.86541	233.668	0.56874
					236.181	9.78496	236.181	0.574199
					238.693	9.70585	238.693	0.579688
					241.206	9.62804	241.206	0.585208
					243.719	9.5515	243.719	0.590759
					246.231	9.47619	246.231	0.596342
					248.744	9.4021	248.744	0.601957
					251.256	9.32919	251.256	0.607605
					253.769	9.25743	253.769	0.613286
					256.281	9.1868	256.281	0.619001
					258.794	9.11728	258.794	0.62475
					261.307	9.04883	261.307	0.630534
					263.819	8.98143	263.819	0.636354
					266.332	8.91506	266.332	0.642209
					268.844	8.84969	268.844	0.648101
					271.357	8.78531	271.357	0.654029
					273.869	8.72189	273.869	0.659996
					276.382	8.65941	276.382	0.666
					278.894	8.59786	278.894	0.672043
					281.407	8.5372	281.407	0.678125
					283.92	8.47743	283.92	0.684246
					286.432	8.41852	286.432	0.690408
					288.945	8.36045	288.945	0.696611
					291.457	8.30321	291.457	0.702856
					293.97	8.24678	293.97	0.709142
					296.482	8.19115	296.482	0.715471
					298.995	8.1363	298.995	0.721844
					301.508	8.0822	301.508	0.72826
					304.02	8.02886	304.02	0.734721
					306.533	7.97624	306.533	0.741227
					309.045	7.92434	309.045	0.747779
					311.558	7.87315	311.558	0.754378
					314.07	7.82265	314.07	0.761023
					316.583	7.77282	316.583	0.767716
					319.095	7.72365	319.095	0.774458
					321.608	7.67514	321.608	0.781248
					324.121	7.62726	324.121	0.788089
					326.633	7.58001	326.633	0.79498
					329.146	7.53338	329.146	0.801922
					331.658	7.48734	331.658	0.808916
					334.171	7.4419	334.171	0.815962
					336.683	7.39704	336.683	0.823062
					339.196	7.35275	339.196	0.830216
					341.709	7.30902	341.709	0.837424
					344.221	7.26585	344.221	0.844688
					346.734	7.22321	346.734	0.852008
					349.246	7.1811	349.246	0.859386
					351.759	7.13951	351.759	0.866821
					354.271	7.09843	354.271	0.874315
					356.784	7.05786	356.784	0.881868
					359.296	7.01778	359.296	0.889481
					361.809	6.97819	361.809	0.897155
					364.322	6.93907	364.322	0.904892
					366.834	6.90043	366.834	0.91269
					369.347	6.86224	369.347	0.920553
					371.859	6.82451	371.859	0.928479
					374.372	6.78723	374.372	0.936471
					376.884	6.75038	376.884	0.944529
					379.397	6.71397	379.397	0.952655
					381.91	6.67798	381.91	0.960848
					384.422	6.64241	384.422	0.969109
					386.935	6.60725	386.935	0.977441
					389.447	6.57249	389.447	0.985843
					391.96	6.53813	391.96	0.994317
					394.472	6.50416	394.472	1.00286
					396.985	6.47058	396.985	1.01148
					399.497	6.43738	399.497	1.02018
					402.01	6.40455	402.01	1.02895
					404.523	6.37208	404.523	1.0378
					407.035	6.33998	407.035	1.04672
					409.548	6.30824	409.548	1.05572
					412.06	6.27685	412.06	1.06481
					414.573	6.2458	414.573	1.07397
					417.085	6.21509	417.085	1.08322
					419.598	6.18472	419.598	1.09254
					422.111	6.15468	422.111	1.10196
					424.623	6.12497	424.623	1.11145
					427.136	6.09557	427.136	1.12104
					429.648	6.06649	429.648	1.13071
					432.161	6.03773	432.161	1.14047
					434.673	6.00927	434.673	1.15032
					437.186	5.98111	437.186	1.16026
					439.698	5.95325	439.698	1.1703
					442.211	5.92569	442.211	1.18043
					444.724	5.89841	444.724	1.19065
					447.236	5.87143	447.236	1.20097
					449.749	5.84472	449.749	1.21139
					452.261	5.81829	452.261	1.2219
					454.774	5.79214	454.774	1.23252
					457.286	5.76626	457.286	1.24324
					459.799	5.74064	459.799	1.25406
					462.312	5.71529	462.312	1.26498
					464.824	5.6902	464.824	1.27601
					467.337	5.66536	467.337	1.28715
					469.849	5.64078	469.849	1.2984
					472.362	5.61645	472.362	1.30976
					474.874	5.59236	474.874	1.32123
					477.387	5.56852	477.387	1.33281
					479.899	5.54491	479.899	1.34451
					482.412	5.52155	482.412	1.35633
					484.925	5.49842	484.925	1.36826
					487.437	5.47552	487.437	1.38031
					489.95	5.45285	489.95	1.39249
					492.462	5.4304	492.462	1.40479
					494.975	5.40818	494.975	1.41721
					497.487	5.38618	497.487	1.42976
					500	5.36439	500	1.44244

## Sheet: Fig5-figsupp1a
Ext_5uM.x	Ext_5uM.d	Ext_20uM.x	Ext_20uM.d	Ext_100uM.x	Ext_100uM.d	Ext_1000uM.x	Ext_1000uM.d
0	-3.2881	0	6.19335	0	-4.15444	0	-2.47893
0.02	0.0867942	0.02	12.652	0.02	-2.41844	0.01	4.66027
0.04	1.81514	0.04	13.9235	0.04	0.650572	0.02	4.68229
0.06	-0.214674	0.06	15.5792	0.06	-1.23008	0.03	5.33645
0.08	-0.569555	0.08	14.7585	0.08	-0.0544219	0.04	10.5656
0.1	2.05905	0.1	14.6857	0.1	0.261447	0.05	8.27921
0.12	3.37872	0.12	8.06885	0.12	5.55333	0.06	13.315
0.14	3.23914	0.14	7.95019	0.14	2.06969	0.07	12.6717
0.16	4.72139	0.16	8.18378	0.16	2.39132	0.08	11.1759
0.18	5.57942	0.18	11.6565	0.18	1.91619	0.09	15.543
0.2	5.79272	0.2	11.1965	0.2	-0.0145865	0.1	14.8156
0.22	4.34461	0.22	12.8318	0.22	4.84824	0.11	12.5819
0.24	3.02651	0.24	19.0306	0.24	3.85981	0.12	12.2018
0.26	3.193	0.26	21.705	0.26	-1.01427	0.13	20.1711
0.28	2.31747	0.28	17.5348	0.28	2.47614	0.14	25.1224
0.3	2.43835	0.3	16.2494	0.3	1.45963	0.15	19.8895
0.32	4.35824	0.32	16.6845	0.32	5.53436	0.16	25.7462
0.34	4.72197	0.34	16.4591	0.34	9.7264	0.17	25.775
0.36	3.20002	0.36	21.1135	0.36	10.6225	0.18	19.7847
0.38	6.30817	0.38	22.4857	0.38	10.0635	0.19	21.8617
0.4	11.6423	0.4	20.3406	0.4	6.99586	0.2	22.5134
0.42	11.2544	0.42	25.5463	0.42	7.5918	0.21	26.1732
0.44	9.81166	0.44	24.1814	0.44	13.9752	0.22	24.8142
0.46	8.89648	0.46	18.1532	0.46	17.2531	0.23	26.4906
0.48	8.2207	0.48	16.9776	0.48	13.9678	0.24	21.6068
0.5	9.021	0.5	18.7183	0.5	15.6679	0.25	16.6468
0.52	9.316	0.52	20.01	0.52	16.2097	0.26	18.3027
0.54	10.7885	0.54	17.3326	0.54	18.8468	0.27	16.7721
0.56	15.2872	0.56	22.5295	0.56	12.7268	0.28	19.3315
0.58	16.8525	0.58	26.8074	0.58	0.503491	0.29	16.3053
0.6	15.2605	0.6	25.2999	0.6	11.8268	0.3	13.8756
0.62	14.1104	0.62	25.9783	0.62	10.0979	0.31	22.1863
0.64	14.8319	0.64	29.6496	0.64	12.2621	0.32	24.3227
0.66	16.5691	0.66	28.1924	0.66	13.3365	0.33	16.5958
0.68	16.9486	0.68	27.8045	0.68	9.89379	0.34	17.9129
0.7	16.0915	0.7	27.8699	0.7	13.5581	0.35	15.7029
0.72	15.4003	0.72	28.9994	0.72	14.5411	0.36	13.3694
0.74	17.6013	0.74	30.6635	0.74	11.9326	0.37	14.6805
0.76	19.1451	0.76	30.6316	0.76	12.5544	0.38	11.6457
0.78	20.5907	0.78	29.608	0.78	17.7698	0.39	15.1154
0.8	21.8814	0.8	25.3393	0.8	18.6492	0.4	16.4094
0.82	23.8155	0.82	29.2805	0.82	15.8239	0.41	18.0647
0.84	23.6477	0.84	33.5005	0.84	16.5086	0.42	18.6613
0.86	20.3083	0.86	30.812	0.86	15.6854	0.43	17.5482
0.88	19.0249	0.88	31.1001	0.88	18.5287	0.44	21.1385
0.9	20.0328	0.9	32.559	0.9	18.8889	0.45	21.7774
0.92	17.2053	0.92	34.4483	0.92	16.643	0.46	20.7226
0.94	16.6115	0.94	28.8392	0.94	12.6775	0.47	30.6499
0.96	18.5317	0.96	32.1875	0.96	12.1867	0.48	27.0888
0.98	19.5743	0.98	35.7468	0.98	16.9419	0.49	23.1468
1	19.0591	1	37.2668	1	19.7822	0.5	26.2259
1.02	19.0046	1.02	32.838	1.02	17.8249	0.51	32.2394
1.04	19.0661	1.04	35.9064	1.04	22.4413	0.52	26.2206
1.06	20.5035	1.06	34.2578	1.06	24.9398	0.53	30.376
1.08	24.2211	1.08	31.6544	1.08	22.7248	0.54	30.3876
1.1	26.9309	1.1	31.2242	1.1	17.5271	0.55	30.0637
1.12	28.4839	1.12	31.8554	1.12	19.0471	0.56	32.4384
1.14	28.0931	1.14	31.3075	1.14	20.8097	0.57	35.3755
1.16	26.5753	1.16	33.1275	1.16	24.7918	0.58	38.2911
1.18	26.2879	1.18	31.6846	1.18	23.3681	0.59	33.1198
1.2	28.6065	1.2	34.2993	1.2	28.6745	0.6	34.1473
1.22	29.3925	1.22	35.9281	1.22	27.803	0.61	37.2813
1.24	28.4257	1.24	41.2184	1.24	28.939	0.62	40.2103
1.26	29.8362	1.26	39.952	1.26	28.0507	0.63	33.9656
1.28	30.4704	1.28	39.3748	1.28	30.9783	0.64	35.7901
1.3	30.6224	1.3	42.5211	1.3	31.8823	0.65	33.5792
1.32	32.8737	1.32	39.5216	1.32	34.4651	0.66	35.266
1.34	33.4954	1.34	45.5134	1.34	36.3794	0.67	32.9154
1.36	32.1879	1.36	43.8969	1.36	36.0239	0.68	37.4072
1.38	34.5192	1.38	44.505	1.38	36.5063	0.69	38.4651
1.4	35.1074	1.4	50.5361	1.4	30.622	0.7	34.6254
1.42	32.9724	1.42	48.6299	1.42	33.1957	0.71	39.9667
1.44	33.9427	1.44	45.9543	1.44	32.7032	0.72	35.786
1.46	38.2661	1.46	47.3455	1.46	36.7203	0.73	34.6389
1.48	42.2782	1.48	46.6873	1.48	36.3729	0.74	39.6598
1.5	45.8979	1.5	47.588	1.5	39.8068	0.75	43.877
1.52	48.497	1.52	46.8482	1.52	36.5617	0.76	41.654
1.54	48.4748	1.54	40.5585	1.54	41.0274	0.77	41.9779
1.56	44.988	1.56	39.1854	1.56	44.6523	0.78	39.7287
1.58	42.6265	1.58	41.3113	1.58	43.2632	0.79	39.5386
1.6	39.7962	1.6	43.5499	1.6	41.3869	0.8	39.7213
1.62	39.5251	1.62	47.672	1.62	46.7671	0.81	43.2031
1.64	44.2847	1.64	44.1957	1.64	51.5912	0.82	44.0976
1.66	46.199	1.66	43.1018	1.66	54.6517	0.83	43.1001
1.68	47.5896	1.68	43.0535	1.68	54.3679	0.84	43.664
1.7	47.669	1.7	47.6598	1.7	53.8359	0.85	43.2091
1.72	41.8125	1.72	49.0962	1.72	53.7988	0.86	45.302
1.74	37.4137	1.74	47.8145	1.74	58.245	0.87	49.3231
1.76	34.4646	1.76	45.1571	1.76	56.0742	0.88	44.4827
1.78	32.7565	1.78	47.1703	1.78	64.6973	0.89	46.5718
1.8	32.3178	1.8	50.4353	1.8	60.3855	0.9	55.2761
1.82	32.1801	1.82	51.0807	1.82	65.3317	0.91	52.3082
1.84	34.2914	1.84	57.4385	1.84	66.5917	0.92	46.5867
1.86	31.3875	1.86	50.4236	1.86	66.8487	0.93	45.7078
1.88	26.8881	1.88	53.665	1.88	70.2074	0.94	51.9964
1.9	28.2812	1.9	57.5139	1.9	68.8322	0.95	54.0507
1.92	31.6281	1.92	56.8411	1.92	72.7881	0.96	47.2972
1.94	35.5334	1.94	51.1968	1.94	66.7672	0.97	55.3037
1.96	40.7187	1.96	50.253	1.96	66.2128	0.98	57.9398
1.98	43.397	1.98	45.6562	1.98	62.7562	0.99	57.783
2	43.5005	2	49.9029	2	64.0777	1	58.633
2.02	42.6767	2.02	48.5823	2.02	64.826	1.01	57.9696
2.04	39.7305	2.04	45.1936	2.04	68.5954	1.02	61.9908
2.06	36.9234	2.06	46.5543	2.06	63.0497	1.03	53.4698
2.08	31.3132	2.08	46.8679	2.08	69.365	1.04	49.3249
2.1	25.7718	2.1	47.6024	2.1	67.4148	1.05	54.6437
2.12	23.3674	2.12	51.6892	2.12	71.8842	1.06	58.437
2.14	22.2743	2.14	52.9261	2.14	70.7032	1.07	55.2997
2.16	24.7612	2.16	50.8759	2.16	73.4708	1.08	54.5685
2.18	28.573	2.18	51.142	2.18	72.3947	1.09	50.5667
2.2	26.8982	2.2	48.9292	2.2	71.5899	1.1	45.6058
2.22	25.9627	2.22	39.9271	2.22	70.0516	1.11	53.5794
2.24	31.9079	2.24	36.8626	2.24	73.6868	1.12	57.5613
2.26	35.7064	2.26	44.1204	2.26	79.5272	1.13	57.9987
2.28	32.9246	2.28	40.8855	2.28	76.8292	1.14	56.1243
2.3	28.3091	2.3	38.2182	2.3	77.5993	1.15	55.0559
2.32	28.2073	2.32	40.497	2.32	76.2779	1.16	62.6545
2.34	32.6443	2.34	45.5981	2.34	74.0819	1.17	68.7456
2.36	35.1409	2.36	40.4141	2.36	73.6761	1.18	61.4582
2.38	34.2375	2.38	43.7035	2.38	78.4027	1.19	64.0553
2.4	35.1722	2.4	39.5074	2.4	79.1057	1.2	66.318
2.42	39.5472	2.42	34.2657	2.42	77.8023	1.21	67.8202
2.44	42.3196	2.44	37.5771	2.44	81.8869	1.22	71.3418
2.46	44.8763	2.46	36.4818	2.46	81.0954	1.23	69.4779
2.48	48.6624	2.48	38.1053	2.48	80.4323	1.24	70.1178
2.5	54.1385	2.5	44.8133	2.5	80.3743	1.25	73.4659
2.52	61.4417	2.52	46.8493	2.52	84.3792	1.26	65.7547
2.54	64.606	2.54	45.0308	2.54	80.8492	1.27	69.8265
2.56	63.028	2.56	50.1159	2.56	74.557	1.28	72.1311
2.58	60.8577	2.58	47.569	2.58	78.4817	1.29	74.1802
2.6	59.6216	2.6	49.6461	2.6	76.0379	1.3	70.6731
2.62	56.4138	2.62	51.1215	2.62	78.5346	1.31	67.3598
2.64	54.2615	2.64	51.5721	2.64	76.3158	1.32	71.6623
2.66	55.3337	2.66	46.8034	2.66	78.7217	1.33	71.2355
2.68	60.6211	2.68	36.9252	2.68	83.9001	1.34	72.2454
2.7	66.8628	2.7	38.5567	2.7	78.8253	1.35	69.2082
2.72	69.7117	2.72	35.8338	2.72	81.3938	1.36	70.8291
2.74	71.4672	2.74	37.7292	2.74	81.8906	1.37	72.4728
2.76	73.3141	2.76	40.6117	2.76	82.7068	1.38	69.4463
2.78	73.4537	2.78	42.346	2.78	85.2085	1.39	78.4584
2.8	75.1301	2.8	39.9936	2.8	84.0558	1.4	69.7208
2.82	75.7453	2.82	44.1037	2.82	88.746	1.41	76.1452
2.84	75.0765	2.84	42.6408	2.84	87.9488	1.42	73.5789
2.86	76.6246	2.86	49.6555	2.86	86.4786	1.43	73.1419
2.88	77.0615	2.88	45.5021	2.88	83.7833	1.44	76.4306
2.9	76.4492	2.9	47.2259	2.9	88.7628	1.45	78.2669
2.92	74.9217	2.92	48.1742	2.92	88.0307	1.46	83.761
2.94	72.3644	2.94	52.2323	2.94	86.9339	1.47	84.3622
2.96	73.0144	2.96	56.7642	2.96	89.583	1.48	85.0421
2.98	74.6851	2.98	53.6195	2.98	95.6034	1.49	83.5343
3	76.4168	3	57.0526	3	96.4252	1.5	80.9743
3.02	79.6291	3.02	58.8126	3.02	101.46	1.51	83.4865
3.04	81.4172	3.04	60.1467	3.04	95.4641	1.52	76.6635
3.06	78.7982	3.06	62.5121	3.06	98.569	1.53	84.6939
3.08	77.5834	3.08	65.8586	3.08	93.105	1.54	85.5475
3.1	80.5502	3.1	60.5404	3.1	98.5842	1.55	83.648
3.12	82.4708	3.12	62.1382	3.12	96.3492	1.56	89.0073
3.14	83.4084	3.14	61.786	3.14	99.9252	1.57	83.0959
3.16	82.8018	3.16	62.718	3.16	99.7686	1.58	79.4852
3.18	80.7546	3.18	67.2652	3.18	103.104	1.59	78.7739
3.2	81.1827	3.2	67.0532	3.2	103.328	1.6	80.6779
3.22	83.2655	3.22	64.4514	3.22	102.813	1.61	82.5708
3.24	84.4996	3.24	62.0205	3.24	107.787	1.62	78.4356
3.26	85.077	3.26	59.4711	3.26	105.348	1.63	83.5195
3.28	85.9939	3.28	59.2831	3.28	102.993	1.64	84.8179
3.3	88.6214	3.3	61.0138	3.3	99.9355	1.65	84.8624
3.32	88.9687	3.32	58.3504	3.32	106.899	1.66	80.5969
3.34	86.3907	3.34	51.1156	3.34	106.1	1.67	86.1143
3.36	86.5258	3.36	57.6836	3.36	108.989	1.68	83.4513
3.38	85.8043	3.38	59.539	3.38	110.816	1.69	87.575
3.4	86.025	3.4	52.5205	3.4	110.784	1.7	85.6006
3.42	87.7872	3.42	63.2054	3.42	109.401	1.71	86.9706
3.44	86.5534	3.44	53.1678	3.44	112.56	1.72	92.4888
3.46	88.0995	3.46	64.0036	3.46	112.744	1.73	87.8158
3.48	90.2111	3.48	63.1492	3.48	112.614	1.74	88.1708
3.5	90.7869	3.5	59.3187	3.5	113.224	1.75	92.7095
3.52	91.101	3.52	63.9416	3.52	119.708	1.76	93.8605
3.54	89.8978	3.54	61.5954	3.54	112.539	1.77	93.4349
3.56	88.1959	3.56	66.6683	3.56	107.715	1.78	91.6376
3.58	86.0306	3.58	69.9673	3.58	111.517	1.79	89.2929
3.6	85.5672	3.6	72.3498	3.6	112.464	1.8	92.3626
3.62	83.7096	3.62	69.6386	3.62	103.913	1.81	97.8163
3.64	82.0198	3.64	70.9568	3.64	106.676	1.82	100.693
3.66	80.1145	3.66	75.1611	3.66	109.387	1.83	98.9498
3.68	78.5601	3.68	69.2457	3.68	107.921	1.84	98.6389
3.7	77.7604	3.7	73.7422	3.7	109.412	1.85	104.22
3.72	79.732	3.72	76.2414	3.72	110.909	1.86	101.862
3.74	80.3595	3.74	74.4457	3.74	111.286	1.87	104.625
3.76	80.7383	3.76	74.0899	3.76	118.358	1.88	103.514
3.78	82.0398	3.78	73.9698	3.78	113.894	1.89	107.854
3.8	81.3888	3.8	69.4714	3.8	120.812	1.9	104.201
3.82	80.0254	3.82	66.8364	3.82	123.871	1.91	110.411
3.84	78.391	3.84	70.5343	3.84	118.836	1.92	104.823
3.86	78.4134	3.86	71.7854	3.86	121.37	1.93	110.992
3.88	80.5426	3.88	68.526	3.88	115.581	1.94	106.944
3.9	81.3614	3.9	72.7444	3.9	119.884	1.95	110.94
3.92	81.1953	3.92	74.2582	3.92	120.037	1.96	108.791
3.94	78.8551	3.94	69.8152	3.94	122.237	1.97	103.634
3.96	75.8998	3.96	65.802	3.96	127.734	1.98	110.611
3.98	74.7146	3.98	73.9803	3.98	131.658	1.99	104.23
4	73.8632	4	74.0296	4	126.901	2	111.794
4.02	74.6546	4.02	73.9577	4.02	134.119	2.01	121.937
4.04	76.6783	4.04	70.1289	4.04	132.825	2.02	124.727
4.06	78.6821	4.06	77.2033	4.06	134.277	2.03	127.778
4.08	80.342	4.08	80.0815	4.08	133.049	2.04	128.615
4.1	79.2772	4.1	81.1281	4.1	137.143	2.05	128.014
4.12	78.7922	4.12	80.3595	4.12	129.712	2.06	128.672
4.14	78.4051	4.14	78.9859	4.14	136.044	2.07	133.25
4.16	78.4751	4.16	80.2979	4.16	138.035	2.08	132.262
4.18	78.067	4.18	78.5905	4.18	141.063	2.09	134.223
4.2	77.5963	4.2	73.0013	4.2	142.896	2.1	134.261
4.22	78.9746	4.22	73.971	4.22	141.065	2.11	129.335
4.24	77.9882	4.24	77.6952	4.24	141.424	2.12	135.808
4.26	75.9059	4.26	78.5297	4.26	140.975	2.13	136.035
4.28	73.4064	4.28	75.4366	4.28	147.606	2.14	130.627
4.3	71.3106	4.3	77.6214	4.3	138.38	2.15	131.991
4.32	68.9996	4.32	79.361	4.32	143.956	2.16	126.691
4.34	68.7215	4.34	82.3667	4.34	147.906	2.17	134.097
4.36	71.0906	4.36	77.7011	4.36	147.025	2.18	134.289
4.38	73.0074	4.38	69.4979	4.38	146.296	2.19	136.945
4.4	75.4406	4.4	68.6195	4.4	150.043	2.2	134.791
4.42	77.3829	4.42	69.1125	4.42	146.221	2.21	139.753
4.44	78.5467	4.44	70.7684	4.44	153.502	2.22	134.7
4.46	78.6208	4.46	77.9257	4.46	146.604	2.23	141.803
4.48	77.8682	4.48	80.674	4.48	147.648	2.24	139.434
4.5	76.9151	4.5	78.5253	4.5	152.622	2.25	136.446
4.52	75.6418	4.52	78.7474	4.52	151.895	2.26	140.566
4.54	76.8057	4.54	78.4514	4.54	149.466	2.27	131.769
4.56	79.2599	4.56	75.5587	4.56	154.703	2.28	139.585
4.58	78.9914	4.58	79.0888	4.58	159.2	2.29	136.996
4.6	77.5349	4.6	80.9816	4.6	161.84	2.3	143.647
4.62	76.4251	4.62	77.5697	4.62	162.759	2.31	139.275
4.64	76.2268	4.64	82.105	4.64	159.529	2.32	136.906
4.66	74.1733	4.66	76.3914	4.66	160.119	2.33	142.618
4.68	75.1837	4.68	71.6005	4.68	165.49	2.34	146.735
4.7	76.5914	4.7	70.5034	4.7	154.536	2.35	146.661
4.72	74.6309	4.72	65.4344	4.72	156.944	2.36	145.629
4.74	73.6216	4.74	66.0985	4.74	163.833	2.37	143.111
4.76	73.1169	4.76	60.7983	4.76	159.643	2.38	146.438
4.78	71.8497	4.78	63.4897	4.78	158.967	2.39	147.076
4.8	70.2359	4.8	62.5507	4.8	158.644	2.4	151.389
4.82	73.0868	4.82	58.7286	4.82	166.59	2.41	153.982
4.84	76.4699	4.84	55.4892	4.84	167.354	2.42	156.345
4.86	77.0698	4.86	55.0555	4.86	169.635	2.43	151.209
4.88	76.1321	4.88	54.2017	4.88	168.1	2.44	158.433
4.9	73.6504	4.9	60.6317	4.9	170.038	2.45	159.963
4.92	70.7101	4.92	58.0844	4.92	175.005	2.46	163.28
4.94	70.9737	4.94	59.2067	4.94	177.86	2.47	163.52
4.96	74.3826	4.96	64.8468	4.96	166.985	2.48	166.013
4.98	74.2045	4.98	56.8018	4.98	175.243	2.49	172.051
5	71.7796	5	63.7893	5	178.296	2.5	164.986
5.02	75.968	5.02	69.2415	5.02	173.301	2.51	157.925
5.04	79.6901	5.04	66.0218	5.04	174.033	2.52	174.033
5.06	79.285	5.06	70.9133	5.06	174.118	2.53	167.39
5.08	79.9068	5.08	69.3389	5.08	174.24	2.54	168.635
5.1	79.5744	5.1	70.8856	5.1	181.911	2.55	169.433
5.12	77.6195	5.12	69.6855	5.12	186.537	2.56	164.554
5.14	77.6344	5.14	70.0552	5.14	179.862	2.57	169.878
5.16	77.8352	5.16	68.3022	5.16	174.494	2.58	171.808
5.18	76.0228	5.18	69.9149	5.18	183.781	2.59	177.306
5.2	75.4778	5.2	64.4725	5.2	183.424	2.6	174.863
5.22	76.7813	5.22	68.7583	5.22	185.582	2.61	178.965
5.24	78.2626	5.24	70.7385	5.24	187.469	2.62	174.953
5.26	78.6675	5.26	66.0797	5.26	185.837	2.63	175.158
5.28	81.088	5.28	73.4403	5.28	180.598	2.64	177.183
5.3	83.0531	5.3	74.4739	5.3	183.949	2.65	176.198
5.32	81.8625	5.32	74.0471	5.32	181.368	2.66	173.9
5.34	82.5228	5.34	71.2018	5.34	186.655	2.67	175.595
5.36	84.5385	5.36	80.1079	5.36	187.16	2.68	186.518
5.38	85.9342	5.38	81.8871	5.38	189.321	2.69	183.575
5.4	86.4655	5.4	76.2235	5.4	191.811	2.7	180.167
5.42	87.6246	5.42	76.8589	5.42	188.33	2.71	188.511
5.44	89.4033	5.44	82.9876	5.44	196.322	2.72	193.768
5.46	91.5175	5.46	82.9209	5.46	189.882	2.73	194.19
5.48	90.5133	5.48	80.8421	5.48	194.376	2.74	193.536
5.5	87.4592	5.5	83.713	5.5	195.023	2.75	192.235
5.52	88.7441	5.52	79.9801	5.52	201.662	2.76	193.81
5.54	91.184	5.54	85.1135	5.54	205.631	2.77	191.804
5.56	91.1149	5.56	87.1476	5.56	201.685	2.78	184.351
5.58	90.0824	5.58	85.8023	5.58	194.69	2.79	191.167
5.6	90.5406	5.6	84.2092	5.6	205.854	2.8	198.525
5.62	94.0832	5.62	83.6383	5.62	203.656	2.81	192.954
5.64	96.6866	5.64	82.3328	5.64	212.032	2.82	193.118
5.66	98.0103	5.66	77.2341	5.66	210.966	2.83	200.981
5.68	98.6085	5.68	79.5193	5.68	218.11	2.84	198.224
5.7	99.2691	5.7	84.6068	5.7	213.553	2.85	194.665
5.72	98.9605	5.72	82.938	5.72	212.345	2.86	193.52
5.74	99.7326	5.74	82.8174	5.74	208.74	2.87	193.812
5.76	99.8639	5.76	83.7053	5.76	208.714	2.88	196.153
5.78	97.4317	5.78	77.4393	5.78	210.094	2.89	196.973
5.8	96.8847	5.8	88.555	5.8	213.89	2.9	197.305
5.82	96.0748	5.82	88.2024	5.82	216.299	2.91	200.17
5.84	92.6431	5.84	87.331	5.84	214.092	2.92	207.177
5.86	90.837	5.86	87.9966	5.86	213.733	2.93	204.722
5.88	86.9668	5.88	85.7009	5.88	219.636	2.94	203.424
5.9	81.7703	5.9	89.5646	5.9	220.678	2.95	201.103
5.92	80.3185	5.92	94.0002	5.92	221.098	2.96	206.743
5.94	79.325	5.94	90.1033	5.94	216.033	2.97	211.321
5.96	78.587	5.96	85.9979	5.96	223.215	2.98	207.652
5.98	80.0656	5.98	89.5868	5.98	223.199	2.99	203.57
6	79.0063	6	90.9551	6	219.188	3	211.406
6.02	76.0714	6.02	96.8833	6.02	222.884	3.01	212.732
6.04	76.5153	6.04	98.9946	6.04	222.972	3.02	216.776
6.06	76.8033	6.06	97.8318	6.06	227.035	3.03	215.489
6.08	75.645	6.08	102.669	6.08	219.123	3.04	216.25
6.1	75.9221	6.1	103.462	6.1	225.316	3.05	221.983
6.12	76.622	6.12	105.884	6.12	225.71	3.06	211.106
6.14	77.9756	6.14	103.452	6.14	226.362	3.07	220.939
6.16	80.0774	6.16	107.993	6.16	227.27	3.08	220.738
6.18	80.7284	6.18	102.305	6.18	221.132	3.09	229.384
6.2	80.5364	6.2	102.793	6.2	233.904	3.1	226.065
6.22	80.9774	6.22	108.428	6.22	232.128	3.11	228.014
6.24	80.3675	6.24	105.78	6.24	227.356	3.12	228.72
6.26	80.298	6.26	108.656	6.26	229.914	3.13	230.199
6.28	81.9167	6.28	108.662	6.28	227.694	3.14	237.544
6.3	80.9069	6.3	112.261	6.3	226.766	3.15	229.156
6.32	77.1709	6.32	107.866	6.32	231.963	3.16	232.991
6.34	76.2064	6.34	104.777	6.34	238.11	3.17	238.662
6.36	77.6366	6.36	112.982	6.36	236.794	3.18	236.395
6.38	80.2528	6.38	117.146	6.38	233.907	3.19	233.672
6.4	85.336	6.4	108.074	6.4	237.931	3.2	238.487
6.42	90.7152	6.42	105.671	6.42	240.041	3.21	233.165
6.44	90.664	6.44	110.583	6.44	233.537	3.22	234.761
6.46	90.2199	6.46	106.509	6.46	232.806	3.23	240.263
6.48	89.8707	6.48	109.548	6.48	241.412	3.24	232.362
6.5	91.9871	6.5	110.501	6.5	241.088	3.25	246.925
6.52	94.8946	6.52	103.734	6.52	245.482	3.26	238.589
6.54	96.9178	6.54	106.605	6.54	249.94	3.27	242.984
6.56	98.9143	6.56	109.583	6.56	247.581	3.28	248.229
6.58	102.256	6.58	112.761	6.58	250.746	3.29	244.498
6.6	103.114	6.6	112.063	6.6	252.869	3.3	246.99
6.62	102.931	6.62	117.006	6.62	249.324	3.31	241.419
6.64	101.861	6.64	116.84	6.64	253.106	3.32	244.536
6.66	102.128	6.66	112.359	6.66	253.486	3.33	249.227
6.68	103.248	6.68	111.975	6.68	253.67	3.34	244.191
6.7	104.901	6.7	116.309	6.7	253.44	3.35	244.898
6.72	105.839	6.72	115.34	6.72	251.934	3.36	250.153
6.74	106.081	6.74	112.23	6.74	255.65	3.37	243.82
6.76	105.493	6.76	117.127	6.76	258.519	3.38	242.368
6.78	103.775	6.78	114.516	6.78	260.629	3.39	245.545
6.8	101.161	6.8	112.706	6.8	258.897	3.4	249.462
6.82	100.603	6.82	122.039	6.82	264.01	3.41	252.189
6.84	102.475	6.84	116.843	6.84	257.744	3.42	251.377
6.86	103.861	6.86	114.321	6.86	263.082	3.43	253.742
6.88	105.309	6.88	118.774	6.88	270.201	3.44	255.337
6.9	109.432	6.9	118.715	6.9	269.386	3.45	255.98
6.92	112.461	6.92	120.233	6.92	267.764	3.46	246.481
6.94	111.332	6.94	120.708	6.94	268.2	3.47	254.338
6.96	109.173	6.96	124.785	6.96	272.149	3.48	262.425
6.98	110.912	6.98	127.069	6.98	273.952	3.49	264.683
7	111.823	7	129.352	7	273.621	3.5	258.571
7.02	111.234	7.02	125.591	7.02	270.386	3.51	252.102
7.04	110.862	7.04	124.138	7.04	268.253	3.52	253.408
7.06	110.638	7.06	122.612	7.06	269.632	3.53	249.052
7.08	109.552	7.08	130.045	7.08	271.01	3.54	262.306
7.1	110.395	7.1	131.827	7.1	269.332	3.55	258.759
7.12	113.62	7.12	134.727	7.12	274.136	3.56	249.993
7.14	113.215	7.14	134.056	7.14	271.709	3.57	258.549
7.16	108.741	7.16	129.221	7.16	273.591	3.58	262.373
7.18	104.56	7.18	136.528	7.18	278.083	3.59	264.407
7.2	104.766	7.2	130.996	7.2	266.629	3.6	256.279
7.22	106.412	7.22	132.157	7.22	269.699	3.61	251.336
7.24	107.101	7.24	137.716	7.24	273.267	3.62	263.118
7.26	104.502	7.26	136.744	7.26	272.572	3.63	257.792
7.28	101.869	7.28	133.991	7.28	275.487	3.64	260.141
7.3	104.32	7.3	134.615	7.3	278.928	3.65	258.964
7.32	108.669	7.32	138.894	7.32	275.046	3.66	262.49
7.34	110.075	7.34	143.593	7.34	280.724	3.67	258.532
7.36	110.649	7.36	145.998	7.36	276.171	3.68	261.071
7.38	111.201	7.38	142.142	7.38	287.991	3.69	268.716
7.4	110.352	7.4	141.935	7.4	280.378	3.7	265.897
7.42	110.061	7.42	141.737	7.42	276.735	3.71	264.764
7.44	110.304	7.44	138.849	7.44	283.969	3.72	264.204
7.46	112.664	7.46	142.915	7.46	281.585	3.73	267.572
7.48	116.885	7.48	141.345	7.48	281.133	3.74	273.459
7.5	119.833	7.5	143.21	7.5	286.458	3.75	270.069
7.52	118.285	7.52	150.163	7.52	286.58	3.76	267.46
7.54	117.863	7.54	147.053	7.54	285.003	3.77	271.771
7.56	120.807	7.56	144.55	7.56	280.688	3.78	278.255
7.58	120.605	7.58	149.415	7.58	286.691	3.79	275.418
7.6	119.175	7.6	150.597	7.6	284.781	3.8	275.681
7.62	120.451	7.62	151.009	7.62	291.322	3.81	269.971
7.64	123.988	7.64	155.314	7.64	287.981	3.82	276.021
7.66	125.948	7.66	155.192	7.66	284.934	3.83	280.392
7.68	126.795	7.68	152.375	7.68	295.855	3.84	269.939
7.7	128.257	7.7	155.753	7.7	299.033	3.85	267.059
7.72	126.678	7.72	159.593	7.72	292.447	3.86	277.593
7.74	128.13	7.74	157.828	7.74	291.245	3.87	278.714
7.76	132.189	7.76	155.82	7.76	293.677	3.88	276.851
7.78	133.05	7.78	155.963	7.78	297.833	3.89	274.316
7.8	133.396	7.8	150.722	7.8	293.386	3.9	279.62
7.82	135.783	7.82	148.385	7.82	292.193	3.91	282.534
7.84	134.097	7.84	155.823	7.84	290.993	3.92	281.66
7.86	133.749	7.86	154.369	7.86	290.234	3.93	270.783
7.88	133.37	7.88	154.541	7.88	290.552	3.94	284.477
7.9	134.205	7.9	145.363	7.9	292.836	3.95	285.868
7.92	134.189	7.92	153.258	7.92	295.358	3.96	276.889
7.94	132.582	7.94	156.623	7.94	296.9	3.97	278.381
7.96	131.629	7.96	156.739	7.96	299.79	3.98	285.756
7.98	133.115	7.98	155.847	7.98	295.741	3.99	283.82
8	136.157	8	149.972	8	294.77	4	283.226
8.02	136.065	8.02	154.141	8.02	299.805	4.01	286.121
8.04	134.793	8.04	154.178	8.04	297.205	4.02	284.859
8.06	133.276	8.06	157.325	8.06	300.638	4.03	292.864
8.08	134.352	8.08	152.315	8.08	299.695	4.04	290.033
8.1	136.539	8.1	148.281	8.1	304.558	4.05	294.056
8.12	136.158	8.12	158.304	8.12	311.144	4.06	283.947
8.14	137.373	8.14	153.893	8.14	303.511	4.07	283.107
8.16	138.705	8.16	153.386	8.16	305.374	4.08	281.665
8.18	137.401	8.18	155.255	8.18	301.94	4.09	275.286
8.2	136.844	8.2	148.994	8.2	311.64	4.1	285.509
8.22	137.977	8.22	149.517	8.22	312.378	4.11	290.159
8.24	138.061	8.24	154.39	8.24	313.554	4.12	293.526
8.26	138.713	8.26	148.429	8.26	311.646	4.13	288.719
8.28	139.574	8.28	152.512	8.28	312.272	4.14	292.594
8.3	141.121	8.3	151.607	8.3	314.331	4.15	290.614
8.32	144.306	8.32	155.66	8.32	316.549	4.16	282.846
8.34	145.372	8.34	159.128	8.34	319.281	4.17	285.988
8.36	146.479	8.36	158.621	8.36	312.731	4.18	286.974
8.38	146.361	8.38	155.722	8.38	319.985	4.19	280.713
8.4	147.458	8.4	158.592	8.4	319.371	4.2	285.325
8.42	151.648	8.42	160.757	8.42	313.62	4.21	281.853
8.44	152.414	8.44	159.788	8.44	315.453	4.22	274.251
8.46	148.001	8.46	159.111	8.46	310.034	4.23	287.68
8.48	146.611	8.48	159.274	8.48	321.839	4.24	283.646
8.5	148.41	8.5	157.861	8.5	311.545	4.25	287.235
8.52	147.422	8.52	161.992	8.52	311.537	4.26	284.251
8.54	146.611	8.54	164.18	8.54	314.116	4.27	288.863
8.56	149.305	8.56	162.642	8.56	314.716	4.28	289.429
8.58	150.903	8.58	160.996	8.58	310.776	4.29	292.881
8.6	150.025	8.6	160.701	8.6	311.512	4.3	292.598
8.62	152.459	8.62	165.312	8.62	316.609	4.31	286.709
8.64	151.686	8.64	166.855	8.64	312.671	4.32	292.51
8.66	150.324	8.66	171.582	8.66	315.871	4.33	295.332
8.68	153.329	8.68	168.315	8.68	315.625	4.34	294.587
8.7	156.683	8.7	168.231	8.7	313.971	4.35	296.199
8.72	160.269	8.72	173.189	8.72	307.217	4.36	295.42
8.74	160.467	8.74	171.082	8.74	311.167	4.37	300.924
8.76	158.578	8.76	173.884	8.76	311.752	4.38	301.193
8.78	158.612	8.78	176.453	8.78	306.324	4.39	301.529
8.8	159.493	8.8	172.971	8.8	315.153	4.4	301.538
8.82	157.603	8.82	174.166	8.82	321.601	4.41	298.238
8.84	155.864	8.84	179.512	8.84	322.853	4.42	296.84
8.86	156.591	8.86	178.886	8.86	324.795	4.43	306.513
8.88	155.574	8.88	174.897	8.88	322.957	4.44	310.824
8.9	153.224	8.9	177.047	8.9	321.189	4.45	310.546
8.92	156.11	8.92	176.935	8.92	322.169	4.46	308.368
8.94	160.542	8.94	177.023	8.94	319.009	4.47	313.383
8.96	159.571	8.96	175.071	8.96	323.563	4.48	318.752
8.98	156.716	8.98	178.831	8.98	331.796	4.49	307.536
9	158.914	9	177.472	9	333.615	4.5	316.736
9.02	160.665	9.02	179.356	9.02	330.428	4.51	318.786
9.04	160.108	9.04	180.049	9.04	326.895	4.52	318.324
9.06	158.062	9.06	179.023	9.06	334.989	4.53	308.675
9.08	157.802	9.08	179.242	9.08	336.423	4.54	314.133
9.1	161.477	9.1	179.815	9.1	333.563	4.55	315.029
9.12	164.251	9.12	180.227	9.12	333.28	4.56	320.563
9.14	163.955	9.14	182.612	9.14	334.865	4.57	321.099
9.16	161.5	9.16	187.304	9.16	339.104	4.58	319.619
9.18	159.897	9.18	180.994	9.18	338.452	4.59	322.802
9.2	160.913	9.2	182.514	9.2	340.169	4.6	326.677
9.22	163.273	9.22	179.921	9.22	338.496	4.61	318.141
9.24	163.642	9.24	180.571	9.24	336.829	4.62	323.932
9.26	165.388	9.26	181.114	9.26	342.14	4.63	327.688
9.28	165.933	9.28	188.432	9.28	343.565	4.64	326.966
9.3	164.947	9.3	183.712	9.3	347.361	4.65	325.372
9.32	166.257	9.32	187.715	9.32	346.452	4.66	329.361
9.34	168.21	9.34	187.391	9.34	340.525	4.67	321.286
9.36	168.745	9.36	184.603	9.36	348.434	4.68	331.526
9.38	165.554	9.38	190.419	9.38	354.023	4.69	330.236
9.4	164.622	9.4	192.806	9.4	350.64	4.7	328.486
9.42	169.581	9.42	192.274	9.42	349.862	4.71	329.08
9.44	173.241	9.44	191.711	9.44	351.067	4.72	332.288
9.46	173.475	9.46	190.622	9.46	354.957	4.73	331.941
9.48	173.366	9.48	190.294	9.48	354.303	4.74	327.751
9.5	172.268	9.5	194.497	9.5	351.668	4.75	333.627
9.52	172.262	9.52	194.343	9.52	351.226	4.76	331.154
9.54	174.217	9.54	191.067	9.54	356.551	4.77	334.818
9.56	175.663	9.56	188.838	9.56	355.187	4.78	326.722
9.58	173.858	9.58	185.295	9.58	350.814	4.79	329.388
9.6	171.67	9.6	188.239	9.6	356.027	4.8	332.598
9.62	171.469	9.62	196.375	9.62	344.761	4.81	336.357
9.64	172.962	9.64	190.152	9.64	349.458	4.82	339.487
9.66	173.455	9.66	189.938	9.66	355.622	4.83	339.315
9.68	175.079	9.68	193.224	9.68	356.289	4.84	338.825
9.7	175.427	9.7	194.225	9.7	353.336	4.85	331.69
9.72	176.514	9.72	200.186	9.72	349.079	4.86	340.12
9.74	172.854	9.74	194.868	9.74	355.116	4.87	345.462
9.76	168.346	9.76	195.923	9.76	347.695	4.88	348.18
9.78	174.852	9.78	196.663	9.78	345.763	4.89	348.062
9.8	182.32	9.8	197.904	9.8	349.222	4.9	347.661
9.82	183.16	9.82	196.922	9.82	354.533	4.91	345.244
9.84	181.766	9.84	198.162	9.84	348.45	4.92	345.344
9.86	180.365	9.86	197.062	9.86	350.859	4.93	340.57
9.88	181.707	9.88	201.87	9.88	349.593	4.94	340.289
9.9	185.689	9.9	200.821	9.9	348.198	4.95	342.253
9.92	189.695	9.92	203.61	9.92	351.749	4.96	339.493
9.94	188.099	9.94	206.576	9.94	349.06	4.97	348.522
9.96	185.792	9.96	208.012	9.96	348.521	4.98	334.498
9.98	182.219	9.98	207.599	9.98	357.256	4.99	343.991
10	180.532	10	210.076	10	349.319	5	344.025
10.02	185.107	10.02	216.196	10.02	352.785	5.01	340.809
10.04	187.833	10.04	210.334	10.04	355.337	5.02	343.768
10.06	185.387	10.06	210.134	10.06	352.948	5.03	341.36
10.08	184.242	10.08	212.823	10.08	356.948	5.04	347.41
10.1	185.069	10.1	213.297	10.1	363.692	5.05	349.07
10.12	183.563	10.12	206.82	10.12	364.004	5.06	342.63
10.14	180.418	10.14	208.697	10.14	364.947	5.07	349.748
10.16	175.64	10.16	211.362	10.16	361.72	5.08	343.267
10.18	173.689	10.18	215.894	10.18	362.231	5.09	349.312
10.2	166.551	10.2	215.509	10.2	362.072	5.1	348.964
10.22	162.779	10.22	212.327	10.22	360.372	5.11	345.404
10.24	163.795	10.24	214.497	10.24	360.871	5.12	349.704
10.26	164.12	10.26	215.456	10.26	368.538	5.13	358.92
10.28	166.505	10.28	214.679	10.28	371.899	5.14	356.965
10.3	164.771	10.3	215.22	10.3	374.061	5.15	361.295
10.32	160.911	10.32	209.599	10.32	369.152	5.16	356.955
10.34	161.839	10.34	219.267	10.34	371.825	5.17	354.05
10.36	166.163	10.36	217.874	10.36	367.697	5.18	357.352
10.38	166.656	10.38	210.274	10.38	370.559	5.19	365.323
10.4	166.859	10.4	217.81	10.4	369.298	5.2	361.957
10.42	168.083	10.42	222.981	10.42	377.372	5.21	358.461
10.44	170.015	10.44	221.348	10.44	381.098	5.22	357.562
10.46	170.459	10.46	222.295	10.46	371.229	5.23	360.797
10.48	171.83	10.48	220.191	10.48	373.305	5.24	359.378
10.5	172.482	10.5	223.042	10.5	372.116	5.25	364.378
10.52	172.754	10.52	225.346	10.52	377.691	5.26	367.262
10.54	174.477	10.54	230.94	10.54	370.498	5.27	373.82
10.56	176.546	10.56	226.318	10.56	369.172	5.28	366.921
10.58	176.353	10.58	219.87	10.58	368.647	5.29	363.275
10.6	176.414	10.6	224.96	10.6	377.616	5.3	366.541
10.62	179.595	10.62	230.083	10.62	371.318	5.31	369.334
10.64	180.067	10.64	233.052	10.64	375.895	5.32	376.072
10.66	179.946	10.66	235.24	10.66	378.595	5.33	373.595
10.68	178.211	10.68	235.654	10.68	375.227	5.34	373.952
10.7	178.857	10.7	230.891	10.7	376.86	5.35	371.802
10.72	182.336	10.72	232.888	10.72	377.516	5.36	371.981
10.74	182.968	10.74	237.435	10.74	380.386	5.37	383.46
10.76	181.578	10.76	238.665	10.76	386.602	5.38	370.285
10.78	179.862	10.78	236.522	10.78	381.23	5.39	379.587
10.8	180.859	10.8	241.554	10.8	377.218	5.4	380.661
10.82	184.363	10.82	242.632	10.82	379.294	5.41	385.71
10.84	184.637	10.84	239.371	10.84	385.201	5.42	390.512
10.86	183.49	10.86	242.848	10.86	386.479	5.43	384.983
10.88	187.651	10.88	245.444	10.88	384.775	5.44	388.43
10.9	188.898	10.9	240.804	10.9	384.792	5.45	385.713
10.92	186.232	10.92	234.904	10.92	379.632	5.46	383.385
10.94	186.929	10.94	241.842	10.94	379.258	5.47	388.821
10.96	188.838	10.96	246.118	10.96	383.655	5.48	390.736
10.98	186.505	10.98	246.925	10.98	380.714	5.49	394.891
11	183.944	11	243.798	11	392.184	5.5	395.138
11.02	180.854	11.02	245.017	11.02	382.478	5.51	393.94
11.04	178.921	11.04	250.174	11.04	381.767	5.52	400.611
11.06	178.43	11.06	248.458	11.06	386.701	5.53	396.478
11.08	178.502	11.08	257.385	11.08	388.615	5.54	405.997
11.1	177.427	11.1	252.238	11.1	384.007	5.55	397.247
11.12	176.284	11.12	253.741	11.12	391.493	5.56	400.708
11.14	176.137	11.14	250.72	11.14	396.77	5.57	407.479
11.16	175.569	11.16	253.575	11.16	402.123	5.58	408.09
11.18	174.65	11.18	251.503	11.18	396.092	5.59	411.697
11.2	174.924	11.2	256.48	11.2	400.141	5.6	413.791
11.22	175.871	11.22	260.151	11.22	402.758	5.61	420.31
11.24	173.173	11.24	260.824	11.24	398.559	5.62	415.49
11.26	172.417	11.26	263.731	11.26	398.667	5.63	417.089
11.28	172.746	11.28	260.48	11.28	402.88	5.64	409.288
11.3	176.465	11.3	260.983	11.3	406.209	5.65	411.221
11.32	178.799	11.32	258.832	11.32	409.507	5.66	411.474
11.34	173.973	11.34	266.621	11.34	396.211	5.67	414.441
11.36	169.738	11.36	269.791	11.36	399.04	5.68	419.525
11.38	170.187	11.38	269.567	11.38	401.515	5.69	420.303
11.4	172.843	11.4	264.543	11.4	403.725	5.7	421.816
11.42	172.45	11.42	269.626	11.42	403.785	5.71	415.913
11.44	171.62	11.44	267.461	11.44	408.372	5.72	418.99
11.46	173.418	11.46	272.6	11.46	396.403	5.73	425.525
11.48	174.113	11.48	270.188	11.48	397.835	5.74	431.083
11.5	174.772	11.5	274.226	11.5	403.614	5.75	425.975
11.52	172.432	11.52	271.184	11.52	404.892	5.76	424.711
11.54	169.156	11.54	275.74	11.54	399.454	5.77	422.871
11.56	170.896	11.56	273.193	11.56	404.149	5.78	425.973
11.58	170.863	11.58	277.838	11.58	396.654	5.79	433.956
11.6	167.024	11.6	278.755	11.6	393.476	5.8	433.177
11.62	165.026	11.62	274.115	11.62	407.789	5.81	435.111
11.64	167.257	11.64	278.359	11.64	411.655	5.82	437.909
11.66	170.714	11.66	278.599	11.66	416.594	5.83	434.961
11.68	171.478	11.68	280.459	11.68	410.85	5.84	432.486
11.7	171.019	11.7	280.002	11.7	413.821	5.85	435.326
11.72	170.601	11.72	282.75	11.72	409.823	5.86	434.839
11.74	170.897	11.74	280.212	11.74	408.841	5.87	425.298
11.76	172.024	11.76	282.781	11.76	418.38	5.88	435.485
11.78	169.959	11.78	283.746	11.78	415.601	5.89	442.055
11.8	163.983	11.8	275.162	11.8	413.61	5.9	434.35
11.82	161.629	11.82	287.886	11.82	418.935	5.91	431.415
11.84	163.594	11.84	286.55	11.84	425.907	5.92	437.916
11.86	162.896	11.86	282.244	11.86	424.027	5.93	442.368
11.88	162.938	11.88	289.935	11.88	423.519	5.94	444.181
11.9	164.482	11.9	292.198	11.9	428.388	5.95	451.98
11.92	165.163	11.92	293.357	11.92	437.557	5.96	436.909
11.94	165.282	11.94	297.985	11.94	428.815	5.97	437.481
11.96	163.975	11.96	303.339	11.96	434.683	5.98	440.254
11.98	165.438	11.98	304.54	11.98	430.22	5.99	449.534
12	168.294	12	295.864	12	438.549	6	458.207
12.02	166.066	12.02	297.517	12.02	427.814	6.01	453.389
12.04	167.213	12.04	299.205	12.04	430.214	6.02	446.525
12.06	173.74	12.06	303.23	12.06	437.212	6.03	452.645
12.08	174.982	12.08	300.718	12.08	434.121	6.04	457.676
12.1	172.465	12.1	303.787	12.1	431.043	6.05	449.925
12.12	172.492	12.12	303.932	12.12	440.816	6.06	446.164
12.14	171.418	12.14	307.715	12.14	444.079	6.07	458.823
12.16	172.003	12.16	307.038	12.16	440.672	6.08	460.988
12.18	172.735	12.18	310.988	12.18	443.181	6.09	455.449
12.2	172.305	12.2	311.16	12.2	439.281	6.1	457.684
12.22	172.699	12.22	305.293	12.22	443.216	6.11	456.447
12.24	175.801	12.24	309.087	12.24	448.186	6.12	460.128
12.26	179.124	12.26	315.871	12.26	451.168	6.13	466.407
12.28	177.938	12.28	316.668	12.28	450.43	6.14	474.858
12.3	176.592	12.3	314.155	12.3	455.99	6.15	466.44
12.32	176.88	12.32	316.041	12.32	455.262	6.16	461.306
12.34	178.403	12.34	310.422	12.34	453.129	6.17	476.234
12.36	179.806	12.36	316.297	12.36	455.539	6.18	468.565
12.38	176.292	12.38	315.677	12.38	459.119	6.19	473.412
12.4	170.73	12.4	315.938	12.4	462.348	6.2	475.484
12.42	168.669	12.42	322.203	12.42	463.54	6.21	469.616
12.44	165.459	12.44	331.052	12.44	463.164	6.22	484.963
12.46	164.604	12.46	328.696	12.46	468.744	6.23	474.132
12.48	165.498	12.48	319.487	12.48	463.574	6.24	474.836
12.5	167.38	12.5	321.751	12.5	470.897	6.25	480.087
12.52	167.175	12.52	318.003	12.52	477.411	6.26	475.318
12.54	166.969	12.54	326.718	12.54	476.572	6.27	484.188
12.56	168.249	12.56	321.281	12.56	473.566	6.28	479.316
12.58	167.645	12.58	324.708	12.58	475.565	6.29	491.404
12.6	167.68	12.6	329.769	12.6	481.422	6.3	488.353
12.62	168.79	12.62	323.851	12.62	467.651	6.31	487.953
12.64	166.934	12.64	321.477	12.64	472.028	6.32	483.38
12.66	163.163	12.66	321.295	12.66	473.078	6.33	492.206
12.68	164.958	12.68	326.159	12.68	474.097	6.34	490.605
12.7	169.359	12.7	321.728	12.7	473.78	6.35	495.33
12.72	170.585	12.72	323.318	12.72	477.538	6.36	502.643
12.74	170.838	12.74	328.856	12.74	483.447	6.37	504.93
12.76	171.718	12.76	328.205	12.76	479.882	6.38	505.737
12.78	170.603	12.78	328.373	12.78	477.553	6.39	502.123
12.8	170.71	12.8	327.257	12.8	471.176	6.4	512.19
12.82	171.885	12.82	326.037	12.82	472.129	6.41	515.867
12.84	169.533	12.84	331.827	12.84	476.87	6.42	512.352
12.86	171.577	12.86	331.414	12.86	478.556	6.43	513.463
12.88	174.311	12.88	325.738	12.88	482.777	6.44	512.961
12.9	173.003	12.9	320.801	12.9	481.539	6.45	509.924
12.92	172.052	12.92	324.068	12.92	483.398	6.46	517.078
12.94	174.027	12.94	312.132	12.94	471.993	6.47	512.314
12.96	174.974	12.96	312.097	12.96	476.303	6.48	511.496
12.98	170.414	12.98	312.629	12.98	488.21	6.49	514.441
13	166.23	13	305.607	13	484.019	6.5	518.054
13.02	165.694	13.02	309.253	13.02	489.482	6.51	518.768
13.04	165.195	13.04	312.321	13.04	495.345	6.52	520.493
13.06	162.71	13.06	310.214	13.06	486.64	6.53	521.412
13.08	161.008	13.08	316.544	13.08	494.933	6.54	514.701
13.1	161.632	13.1	321.529	13.1	493.408	6.55	518.274
13.12	163.801	13.12	322.755	13.12	495.404	6.56	517.423
13.14	167.326	13.14	320.561	13.14	489.817	6.57	516.393
13.16	167.147	13.16	319.965	13.16	487.017	6.58	529.475
13.18	163.525	13.18	320.581	13.18	491.263	6.59	535.277
13.2	163.48	13.2	322.263	13.2	489.804	6.6	530.807
13.22	163.1	13.22	315.371	13.22	495.542	6.61	525.038
13.24	164.576	13.24	324.354	13.24	502.497	6.62	532.43
13.26	167.892	13.26	324.321	13.26	506.455	6.63	532.191
13.28	166.289	13.28	325.519	13.28	503.354	6.64	525.72
13.3	165.103	13.3	318.799	13.3	500.752	6.65	530.151
13.32	168.303	13.32	329.789	13.32	507.928	6.66	532.379
13.34	171.315	13.34	328.85	13.34	498.333	6.67	539.828
13.36	171.516	13.36	326.2	13.36	497.702	6.68	539.617
13.38	169.654	13.38	325.376	13.38	493.456	6.69	536.982
13.4	168.298	13.4	323.816	13.4	499.384	6.7	528.249
13.42	163.091	13.42	322.44	13.42	497.276	6.71	535.635
13.44	159.427	13.44	323.741	13.44	502.507	6.72	533.013
13.46	160.148	13.46	324.706	13.46	502.862	6.73	530.382
13.48	159.086	13.48	328.884	13.48	507.831	6.74	532.191
13.5	157.305	13.5	323.66	13.5	509.204	6.75	537.093
13.52	155.369	13.52	319.643	13.52	505.242	6.76	546.656
13.54	155.232	13.54	325.297	13.54	505.606	6.77	530.957
13.56	156.468	13.56	328.739	13.56	507.41	6.78	542.669
13.58	157.48	13.58	333.787	13.58	514.48	6.79	536.746
13.6	157.934	13.6	325.326	13.6	514.628	6.8	536.047
13.62	156.891	13.62	329.327	13.62	510.065	6.81	532.4
13.64	152.966	13.64	337.234	13.64	512.614	6.82	535.442
13.66	151.907	13.66	341	13.66	518.027	6.83	544.44
13.68	154.6	13.68	340.901	13.68	522.716	6.84	547.54
13.7	157.821	13.7	335.451	13.7	523.133	6.85	538.971
13.72	157.503	13.72	343.041	13.72	527.085	6.86	538.544
13.74	155.788	13.74	341.446	13.74	529.534	6.87	543.428
13.76	156.694	13.76	337.376	13.76	517.597	6.88	541.819
13.78	153.347	13.78	342.117	13.78	529.505	6.89	548.907
13.8	147.84	13.8	340.944	13.8	528.121	6.9	542.559
13.82	151.177	13.82	340.405	13.82	527.995	6.91	554.523
13.84	159.48	13.84	347.133	13.84	525.622	6.92	549.073
13.86	167.047	13.86	343.476	13.86	524.659	6.93	549.942
13.88	170.776	13.88	346.601	13.88	526.967	6.94	561.103
13.9	172.122	13.9	342.141	13.9	525.878	6.95	547.295
13.92	174.501	13.92	346.85	13.92	530.715	6.96	548.575
13.94	175.172	13.94	351.971	13.94	528.311	6.97	543.561
13.96	172.865	13.96	347.748	13.96	534.068	6.98	548.863
13.98	172.91	13.98	346.689	13.98	534.422	6.99	543.359
14	174.714	14	342.844	14	533.827	7	538.496
14.02	174.046	14.02	354.683	14.02	529.352	7.01	544.165
14.04	173.484	14.04	354.951	14.04	537.174	7.02	541.616
14.06	173.945	14.06	355.256	14.06	537.965	7.03	544.543
14.08	176.177	14.08	350.943	14.08	538.416	7.04	546.703
14.1	180.906	14.1	351.187	14.1	536.065	7.05	537.683
14.12	182.327	14.12	344.873	14.12	541.37	7.06	546.344
14.14	182.205	14.14	346.342	14.14	537.831	7.07	552.862
14.16	179.033	14.16	342.057	14.16	538.01	7.08	544.847
14.18	174.591	14.18	333.839	14.18	546.522	7.09	556.919
14.2	175.5	14.2	337.188	14.2	548.727	7.1	557.533
14.22	175.804	14.22	337.711	14.22	544.615	7.11	552.094
14.24	172.949	14.24	341.283	14.24	547.343	7.12	550.672
14.26	172.899	14.26	338.941	14.26	548.785	7.13	550.685
14.28	172.115	14.28	344.096	14.28	554.098	7.14	548.79
14.3	170.205	14.3	345.24	14.3	540.962	7.15	552.634
14.32	165.742	14.32	343.406	14.32	544.267	7.16	558.783
14.34	164.55	14.34	345.828	14.34	546.941	7.17	554.183
14.36	165.242	14.36	346.614	14.36	541.943	7.18	554.644
14.38	163.359	14.38	347.561	14.38	552.811	7.19	560.152
14.4	160.643	14.4	351.098	14.4	562.473	7.2	560.364
14.42	158.939	14.42	355.452	14.42	545.781	7.21	546.931
14.44	158.93	14.44	346.764	14.44	550.93	7.22	555.69
14.46	157.931	14.46	352.076			7.23	562.732
14.48	155.267	14.48	351.65			7.24	568.492
14.5	153.813	14.5	354.679			7.25	567.006
14.52	154.8	14.52	356.465			7.26	552.936
14.54	151.555	14.54	354.985			7.27	564.064
14.56	148.607	14.56	355.842			7.28	564.937
14.58	150.963	14.58	355.281			7.29	566.641
14.6	154.509	14.6	355.567			7.3	575.121
14.62	155.034	14.62	358.742			7.31	566.691
14.64	155.553	14.64	362.379			7.32	568.093
14.66	154.378	14.66	364.337			7.33	580.57
14.68	152.101	14.68	361.216			7.34	573.353
14.7	152.108	14.7	355.685			7.35	569.691
14.72	149.949	14.72	357.092			7.36	576.666
14.74	147.612	14.74	357.114			7.37	576.187
14.76	145.858	14.76	359.155			7.38	567.027
14.78	145.618	14.78	359.923			7.39	569.338
14.8	146.377	14.8	359.676
14.82	146.205	14.82	361.329
14.84	145.03	14.84	364.723
14.86	145.065	14.86	360.692
14.88	147.303	14.88	366.976
14.9	147.016	14.9	366.623
14.92	146.105	14.92	365.009
14.94	149.802	14.94	370.418
14.96	152.08	14.96	369.333
14.98	150.73	14.98	368.564
15	149.257	15	367.442
15.02	148.537	15.02	367.142
15.04	146.318	15.04	366.055
15.06	144.459	15.06	374.585
15.08	142.799	15.08	378.733
15.1	142.133	15.1	374.281
15.12	138.554	15.12	375.373
15.14	137.752	15.14	371.715
15.16	141.65	15.16	374.501
15.18	145.807	15.18	376.356
15.2	149.454	15.2	372.808
15.22	149.406	15.22	380.919
15.24	146.426	15.24	373.642
15.26	146.191	15.26	369.676
15.28	150.749	15.28	373.92
15.3	153.572	15.3	374.448
15.32	152.384	15.32	377.513
15.34	150.951	15.34	376.479
15.36	153.338	15.36	377.515
15.38	156.858	15.38	374.459
15.4	157.271	15.4	376.3
15.42	157.015	15.42	381.141
15.44	157.277	15.44	377.507
15.46	156.569	15.46	380.074
15.48	158.828	15.48	378.755
15.5	161.032	15.5	370.96
15.52	160.817	15.52	381.626
15.54	160.204	15.54	383.509
15.56	160.462	15.56	379.205
15.58	161.238	15.58	383.84
15.6	165.367	15.6	383.596
15.62	167.29	15.62	381.576
15.64	165.503	15.64	382.975
15.66	166.129	15.66	382.579
15.68	167.74	15.68	391.91
15.7	168.213	15.7	387.523
15.72	169.175	15.72	383.872
15.74	170.339	15.74	392.282
15.76	169.252	15.76	388.306
15.78	169.069	15.78	391.401
15.8	172.53	15.8	387.516
15.82	172.046	15.82	388.667
15.84	170.621	15.84	390.963
15.86	170.444	15.86	393.629
15.88	168.481	15.88	391.884
15.9	166.739	15.9	388.5
15.92	165.451	15.92	396.201
15.94	164.448	15.94	389.041
15.96	169.788	15.96	384.345
15.98	173.436	15.98	386.496
16	173.631	16	388.698
16.02	171.12	16.02	387.877
16.04	168.574	16.04	385.762
16.06	168.017	16.06	389.732
16.08	168.645	16.08	388.36
16.1	169.718	16.1	381.689
16.12	171.22	16.12	390.296
16.14	174.39	16.14	391.737
16.16	176.254	16.16	389.254
16.18	177.965	16.18	394.07
16.2	180.283	16.2	393.056
16.22	178.767	16.22	399.575
16.24	175.37	16.24	394.172
16.26	174.059	16.26	388.664
16.28	171.779	16.28	392.489
16.3	168.46	16.3	392.408
16.32	168.786	16.32	399.929
16.34	172.633	16.34	402.998
16.36	176.74	16.36	400.094
16.38	173.889	16.38	399.12
16.4	172.057	16.4	402.912
16.42	177.156	16.42	400.835
16.44	181.344	16.44	394.337
16.46	178.571	16.46	398.969
16.48	176.325	16.48	395.797
16.5	178.195	16.5	394.62
16.52	181.77	16.52	395.219
16.54	182.769	16.54	398.545
16.56	180.568	16.56	399.858
16.58	179.844	16.58	406.018
16.6	182.165	16.6	404.893
16.62	184.454	16.62	407.524
16.64	184.464	16.64	406.171
16.66	183.987	16.66	403.366
16.68	184.689	16.68	411.382
16.7	189.064	16.7	411.205
16.72	194.79	16.72	406.644
16.74	194.257	16.74	413.518
16.76	191.033	16.76	415.922
16.78	192.729	16.78	421.41
16.8	193.244	16.8	422.296
16.82	194.211	16.82	418.063
16.84	197.49	16.84	421.865
16.86	198.334	16.86	415.032
16.88	200.722	16.88	419.761
16.9	200.867	16.9	424.584
16.92	196.606	16.92	421.358
16.94	193.891	16.94	424.076
16.96	194.308	16.96	423.486
16.98	195.238	16.98	423.997
17	194.946	17	422.556
17.02	192.733	17.02	421.528
17.04	190.831	17.04	432.804
17.06	189.04	17.06	429.49
17.08	185.567	17.08	433.029
17.1	181.35	17.1	428.252
17.12	179.096	17.12	429.169
17.14	179.633	17.14	435.277
17.16	182.375	17.16	436.878
17.18	184.59	17.18	439.886
17.2	184	17.2	432.239
17.22	183.23	17.22	432.426
17.24	183.632	17.24	443.609
17.26	183.022	17.26	433.846
17.28	184.61	17.28	439.23
17.3	186.883	17.3	438.69
17.32	189.832	17.32	438.329
17.34	191.345	17.34	449.631
17.36	190.186	17.36	451.789
17.38	191.069	17.38	438.916
17.4	192.712	17.4	441.247
17.42	193.388	17.42	444.361
17.44	194.32	17.44	443.937
17.46	195.306	17.46	440.56
17.48	196.133	17.48	439
17.5	199.074	17.5	433.55
17.52	200.858	17.52	430.354
17.54	199.032	17.54	429.657
17.56	198.852	17.56	440.193
17.58	201.163	17.58	441.202
17.6	199.985	17.6	435.332
17.62	196.492	17.62	437.515
17.64	191.724	17.64	436.484
17.66	188.132	17.66	441.07
17.68	187.45	17.68	441.358
17.7	185.872	17.7	443.152
17.72	183.064	17.72	436.768
17.74	182.47	17.74	444.367
17.76	184.647	17.76	447.431
17.78	188.447	17.78	444.162
17.8	189.382	17.8	446.335
17.82	188.307	17.82	450.67
17.84	190.132	17.84	445.685
17.86	194.311	17.86	448.208
17.88	194.625	17.88	453.344
17.9	192.877	17.9	449.505
17.92	195.031	17.92	454.301
17.94	198.065	17.94	455.729
17.96	196.533	17.96	451.513
17.98	195.59	17.98	457.928
18	193.49	18	457.582
18.02	194.718	18.02	451.84
18.04	194.416	18.04	453.23
18.06	189.741	18.06	457.705
18.08	188.506	18.08	459.175
18.1	188.474	18.1	461.095
18.12	188.217	18.12	458.161
18.14	190.329	18.14	458.291
18.16	191.757	18.16	456.823
18.18	190.284	18.18	458.521
18.2	191.26	18.2	457.357
18.22	192.535	18.22	455.322
18.24	188.954	18.24	460.2
18.26	185.054	18.26	461.582
18.28	186.783	18.28	457.141
18.3	187.995	18.3	459.651
18.32	189.791	18.32	466.017
18.34	192.956	18.34	466.831
18.36	188.927	18.36	461.506
18.38	183.497	18.38	458.478
18.4	185.679	18.4	464.144
18.42	189.486	18.42	460.012
18.44	188.935	18.44	458.806
18.46	188.366	18.46	456.413
18.48	186.25	18.48	464.174
18.5	183.563	18.5	472.967
18.52	185.839	18.52	466.741
18.54	187.528	18.54	463.045
18.56	184.558	18.56	463.088
18.58	180.684	18.58	467.892
18.6	176.101	18.6	470.825
18.62	173.956	18.62	465.979
18.64	177.157	18.64	467.511
18.66	180.2	18.66	471.964
18.68	178.48	18.68	461.236
18.7	179.718	18.7	465.942
18.72	184.303	18.72	468.89
18.74	183.293	18.74	470.517
18.76	177.987	18.76	469.186
18.78	174.075	18.78	475.518
18.8	171.753	18.8	476.24
18.82	176.073	18.82	477.181
18.84	176.869	18.84	478.097
18.86	173.869	18.86	480.525
18.88	175.108	18.88	482.441
18.9	175.754	18.9	480.905
18.92	177.222	18.92	487.671
18.94	176.998	18.94	489.301
18.96	174.013	18.96	485.287
18.98	174.804	18.98	485.807
19	177.231	19	492.511
19.02	178.221	19.02	491.297
19.04	178.696	19.04	494.125
19.06	181.18	19.06	494.956
19.08	182.286	19.08	498.197
19.1	179.602	19.1	496.297
19.12	177.729	19.12	498.244
19.14	179.939	19.14	498.932
19.16	183.677	19.16	500.268
19.18	185.11	19.18	498.447
19.2	184.84	19.2	508.552
19.22	184.679	19.22	507.455
19.24	185.232	19.24	511.015
19.26	184.596	19.26	501.698
19.28	183.851	19.28	506.361
19.3	184.759	19.3	509.732
19.32	186.37	19.32	502.55
19.34	187.215	19.34	509.789
19.36	189.522	19.36	507.793
19.38	190.647	19.38	514.717
19.4	186.855	19.4	514.292
19.42	185.326	19.42	512.954
19.44	186.56	19.44	515.529
19.46	186.03	19.46	508.237
19.48	188.79	19.48	511.155
19.5	191.602	19.5	512.127
19.52	190.827	19.52	514.603
19.54	188.909	19.54	515.386
19.56	188.049	19.56	515.568
19.58	188.558	19.58	516.572
19.6	190.944	19.6	518.414
19.62	192.846	19.62	519.577
19.64	196.575	19.64	519.286
19.66	197.463	19.66	520.281
19.68	196.617	19.68	522.265
19.7	196.461	19.7	521.064
19.72	197.977	19.72	517.83
19.74	195.812	19.74	521.46
19.76	191.62	19.76	523.703
19.78	190.16	19.78	516.946
19.8	188.472	19.8	527.442
19.82	190.866	19.82	530.428
19.84	194.074	19.84	528.746
19.86	196.744	19.86	528.708
19.88	198.248	19.88	516.497
19.9	200.198	19.9	522.178
19.92	200.163	19.92	522.084
19.94	199.233	19.94	526.269
19.96	199.317	19.96	530.046
19.98	202.158	19.98	526.788
20	203.519	20	516.896
20.02	202.962	20.02	527.286
20.04	204.566	20.04	522.025
20.06	205.737	20.06	518.261
20.08	208.329	20.08	519.574
20.1	209.218	20.1	521.366
20.12	208.821	20.12	523.604
20.14	210.193	20.14	519.871
20.16	210.595	20.16	522.702
20.18	210.046	20.18	517.463
20.2	211.673	20.2	521.704
20.22	212.961	20.22	519.174
20.24	214.738	20.24	524.345
20.26	217.804	20.26	524.596
20.28	218.58	20.28	523.566
20.3	215.525	20.3	533.064
20.32	215.257	20.32	529.505
20.34	219.991	20.34	522.427
20.36	220.77	20.36	529.957
20.38	219.69	20.38	523.986
20.4	221.406	20.4	525.108
20.42	220.607	20.42	526.677
20.44	217.234	20.44	521.947
20.46	216.408	20.46	522.034
20.48	218.315	20.48	526.519
20.5	218.553	20.5	527.833
20.52	217.675	20.52	528.463
20.54	215.783	20.54	526.534
20.56	216.446	20.56	527.823
20.58	216.454	20.58	533.273
20.6	214.258	20.6	528.065
20.62	214.41	20.62	530.385
20.64	218.154	20.64	528.732
20.66	222.053	20.66	528.279
20.68	222.185	20.68	533.62
20.7	219.459	20.7	534.704
20.72	217.673	20.72	525.951
20.74	218.164	20.74	534.293
20.76	219.346	20.76	538.263
20.78	220.094	20.78	542.284
20.8	222.374	20.8	547.797
20.82	225.768	20.82	536.92
20.84	228.521	20.84	538.562
20.86	227.401	20.86	542.496
20.88	225.829	20.88	541.099
20.9	228.161	20.9	546.66
20.92	231.459	20.92	540.765
20.94	229.445	20.94	542.254
20.96	228.563	20.96	549.489
20.98	232.039	20.98	546.333
21	234.206	21	543.107
21.02	235.772	21.02	543.105
21.04	235.372	21.04	552.488
21.06	233.399	21.06	545.973
21.08	231.587	21.08	546.931
21.1	230.151	21.1	548.953
21.12	230.736	21.12	552.743
21.14	232.198	21.14	545.423
21.16	230.967	21.16	544.13
21.18	230.998	21.18	549.546
21.2	235.959	21.2	558.104
21.22	234.416	21.22	550.388
21.24	230.21	21.24	550.711
21.26	227.846	21.26	555.107
21.28	223.642	21.28	554.884
21.3	222.504	21.3	555.094
21.32	222.199	21.32	560.21
21.34	219.891	21.34	552.618
21.36	223.515	21.36	551.617
21.38	230.979	21.38	565.015
21.4	233.112	21.4	562.851
21.42	231.321	21.42	562.526
21.44	231.746	21.44	563.299
21.46	231.289	21.46	561.444
21.48	227.54	21.48	562.041
21.5	227.98	21.5	559.123
21.52	229.721	21.52	560.641
21.54	232.267	21.54	565.64
21.56	232.97	21.56	566.69
21.58	232.965	21.58	565.571
21.6	237.425	21.6	571.512
21.62	242.399	21.62	566.926
21.64	244.322	21.64	573.168
21.66	240.045	21.66	577.195
21.68	239.123	21.68	570.38
21.7	243.261	21.7	568.879
21.72	241.084
21.74	235.92
21.76	234.991
21.78	235.907
21.8	236.221
21.82	235.684
21.84	235.759
21.86	237.025
21.88	238.215
21.9	239.757
21.92	242.884
21.94	244.164
21.96	243.222
21.98	243.033
22	243.55
22.02	243.135
22.04	242.775
22.06	244.918
22.08	246.22
22.1	246.798
22.12	249.663
22.14	251.742
22.16	248.629
22.18	248.886
22.2	249.544
22.22	249.846
22.24	252.112
22.26	249.706
22.28	243.178
22.3	240.215
22.32	239.333
22.34	236.807
22.36	238.811
22.38	240.766
22.4	238.075
22.42	235.917
22.44	234.319
22.46	230.342
22.48	228.837
22.5	230.185
22.52	229.4
22.54	225.841
22.56	224.102
22.58	223.795
22.6	224.025
22.62	228.031
22.64	229.547
22.66	229.161
22.68	229.493
22.7	229.25
22.72	233.213
22.74	235.495
22.76	232.321
22.78	230.353
22.8	231.099
22.82	229.142
22.84	227.591
22.86	230.986
22.88	234.874
22.9	234.174
22.92	233.819
22.94	238.354
22.96	241.744
22.98	238.68
23	236.145
23.02	235.367
23.04	234.795
23.06	232.822
23.08	232.384
23.1	233.623
23.12	234.143
23.14	235.002
23.16	235.011
23.18	236.327
23.2	237.417
23.22	233.439
23.24	231.91
23.26	233.997
23.28	234.281
23.3	237.098
23.32	237.769
23.34	234.75
23.36	233.555
23.38	232.524
23.4	225.849
23.42	212.81
23.44	211.373
23.46	214.555
23.48	216.584
23.5	216.387
23.52	213.98
23.54	212.849
23.56	209.483
23.58	207.98
23.6	207.94
23.62	206.36
23.64	208.609
23.66	207.779
23.68	205.443
23.7	205.679
23.72	203.189
23.74	196.31
23.76	187.804
23.78	177.926
23.8	175.802
23.82	177.562
23.84	177.843
23.86	181.098
23.88	183.569
23.9	182.537
23.92	184.967
23.94	186.622
23.96	182.35
23.98	175.445
24	172.219
24.02	172.271
24.04	172.179
24.06	170.929
24.08	169.808
24.1	170.82
24.12	172.919
24.14	172.728
24.16	172.071
24.18	171.038
24.2	167.693
24.22	166.1
24.24	166.69
24.26	164.131
24.28	160.245
24.3	164.103
24.32	168.784
24.34	167.292
24.36	164.066
24.38	165.431
24.4	167.723
24.42	167.324
24.44	166.94
24.46	168.457
24.48	168.407
24.5	168.336
24.52	171.063
24.54	172.123
24.56	171.867
24.58	171.575
24.6	170.17
24.62	171.219
24.64	172.603
24.66	173.736
24.68	169.787
24.7	163.774
24.72	165.705
24.74	171.864
24.76	172.342
24.78	169.13
24.8	170.818
24.82	172.814
24.84	174.046
24.86	176.085
24.88	177.658
24.9	179.623
24.92	179.96
24.94	178.333
24.96	178.547
24.98	181.15
25	180.776
25.02	180.22
25.04	181.328
25.06	180.825
25.08	178.028
25.1	177.913
25.12	180.094
25.14	178.677
25.16	174.184
25.18	170.881
25.2	169.734
25.22	168.755
25.24	171.629
25.26	178.05
25.28	180.355
25.3	179.718
25.32	180.004
25.34	179.629
25.36	177.668
25.38	176.607
25.4	177.237
25.42	180.32
25.44	180.951
25.46	177.502
25.48	180.041
25.5	183.022
25.52	181.608
25.54	183.541
25.56	184.646
25.58	186.18
25.6	185.096
25.62	181.36
25.64	181.285
25.66	185.568
25.68	188.58
25.7	187.021
25.72	183.964
25.74	184.87
25.76	185.845
25.78	180.946
25.8	177.009
25.82	181.046
25.84	185.246
25.86	187.284
25.88	187.277
25.9	187.063
25.92	185.569
25.94	182.47
25.96	180.654
25.98	180.818
26	179.638
26.02	179.953
26.04	180.475
26.06	179.968
26.08	181.974
26.1	183.574
26.12	180.37
26.14	177.821
26.16	178.804
26.18	179.85
26.2	179.046
26.22	177.661
26.24	180.945
26.26	184.756
26.28	185.37
26.3	184.169
26.32	183.499
26.34	183.259
26.36	181.739
26.38	181.444
26.4	183.059
26.42	184.886
26.44	183.273
26.46	180.249
26.48	176.201
26.5	172.651
26.52	171.922
26.54	173.377
26.56	174.829
26.58	176.362
26.6	176.91
26.62	177.744
26.64	179.405
26.66	177.457
26.68	175.16
26.7	174.344
26.72	171.795
26.74	169.145
26.76	167.767
26.78	169.163
26.8	172.804
26.82	176.984
26.84	177.807
26.86	177.757
26.88	176.591
26.9	177.814
26.92	179.753
26.94	176.192
26.96	173.26
26.98	172.444
27	170.705
27.02	169.257
27.04	170.357
27.06	172.478
27.08	174.873
27.1	177.34
27.12	178.46
27.14	178.289
27.16	175.959
27.18	170.918
27.2	168.41
27.22	168.653
27.24	173.46
27.26	174.103
27.28	172.18
27.3	172.335
27.32	172.563
27.34	174.279
27.36	175.354
27.38	174.233
27.4	171.847
27.42	170.281
27.44	166.984
27.46	162.81
27.48	162.203
27.5	163.823
27.52	162.299
27.54	162.956
27.56	172.548
27.58	180.098
27.6	181.959
27.62	179.112
27.64	174.068
27.66	175.289
27.68	176.81
27.7	176.222
27.72	177.862
27.74	178.352
27.76	180.407
27.78	181.382
27.8	181.054
27.82	182.987
27.84	185.02
27.86	185.196
27.88	182.893
27.9	179.278
27.92	178.242
27.94	179.764
27.96	179.97
27.98	180.39
28	179.592
28.02	181.158
28.04	186.192
28.06	186.255
28.08	185.815
28.1	188.381
28.12	193.644
28.14	194.647
28.16	192.073
28.18	190.674
28.2	187.672
28.22	186.938
28.24	188.202
28.26	188.738
28.28	189.467
28.3	189.589
28.32	188.023
28.34	187.839
28.36	189.897
28.38	195.149
28.4	198.426
28.42	195.989
28.44	193.518
28.46	195.741
28.48	197.138
28.5	197.102
28.52	196.273
28.54	197.364
28.56	200.194
28.58	200.76
28.6	202.594
28.62	204.727
28.64	202.872
28.66	201.11
28.68	202.032
28.7	200.67
28.72	200.261
28.74	207.678
28.76	209.827
28.78	206.963
28.8	205.36
28.82	203.521
28.84	205.273
28.86	208.309
28.88	208.696
28.9	208.782
28.92	207.727
28.94	206.696
28.96	205.355
28.98	202.432
29	201.829
29.02	205.335
29.04	208.743
29.06	207.215
29.08	201.96
29.1	201.4
29.12	202.787
29.14	203.51
29.16	204.258
29.18	207.917
29.2	212.868
29.22	214.126
29.24	211.454
29.26	209.952
29.28	209.788
29.3	209.769
29.32	206.951
29.34	202.625
29.36	198.316
29.38	194.387
29.4	195.144
29.42	198.368
29.44	197.19
29.46	194.872
29.48	193.52
29.5	193.383
29.52	193.626
29.54	193.517
29.56	191.881
29.58	189.351
29.6	189.704
29.62	189.716
29.64	191.012
29.66	191.733
29.68	190.72
29.7	191.295
29.72	191.138
29.74	192.558
29.76	195.148
29.78	195.021
29.8	195.874
29.82	198.389
29.84	202.147
29.86	204.833
29.88	203.897
29.9	206.51
29.92	206.947
29.94	205.364
29.96	206.645
29.98	206.047
30	205.542
30.02	207.554
30.04	208.319
30.06	209.655
30.08	211.967
30.1	216.986
30.12	220.458
30.14	219.939
30.16	217.618
30.18	211.414
30.2	208.714
30.22	213.232
30.24	216.854
30.26	217.418
30.28	214.943
30.3	214.522
30.32	214.734
30.34	214.063
30.36	215.094
30.38	220.466
30.4	222.855
30.42	221.415
30.44	219.674
30.46	219.828
30.48	223.14
30.5	225.339
30.52	226.44
30.54	226.069
30.56	228.307
30.58	230.488
30.6	229.665
30.62	228.03
30.64	229.887
30.66	232.378
30.68	233.127
30.7	233.821
30.72	231.593
30.74	230.787
30.76	232.667
30.78	234.913
30.8	234.006
30.82	234.654
30.84	236.369
30.86	238.456
30.88	241.072
30.9	238.801
30.92	238.078
30.94	243.232
30.96	245.848
30.98	246.379
31	247.506
31.02	247.525
31.04	246.303
31.06	247.997
31.08	253.525
31.1	255.776
31.12	252.319
31.14	251.436
31.16	254.467
31.18	255.704
31.2	255.625
31.22	256.25
31.24	257.097
31.26	254.837
31.28	253.208
31.3	253.198
31.32	253.439
31.34	258.376
31.36	263.25
31.38	264.891
31.4	265.336
31.42	266.116
31.44	267.994
31.46	270.535
31.48	269.331
31.5	267.593
31.52	269.085
31.54	273.076
31.56	277.893
31.58	279.159
31.6	278.141
31.62	274.466
31.64	264.46
31.66	257.901
31.68	258.116
31.7	258.517
31.72	258.865
31.74	258.017
31.76	254.045
31.78	252.245
31.8	256.345
31.82	258.439
31.84	257.689
31.86	259.775
31.88	257.583
31.9	253.257
31.92	255.687
31.94	255.258
31.96	249.827
31.98	246.049
32	244.248
32.02	242.554
32.04	244.288
32.06	245.973
32.08	247.066
32.1	245.652
32.12	241.381
32.14	240.605
32.16	241.127
32.18	239.337
32.2	239.757
32.22	243.296
32.24	246.944
32.26	249.89
32.28	249.165
32.3	247.312
32.32	245.104
32.34	243.17
32.36	242.453
32.38	243.072
32.4	241.565
32.42	240.792
32.44	241.146
32.46	239.208
32.48	237.839
32.5	238.33
32.52	242.004
32.54	244.199
32.56	240.713
32.58	238.024
32.6	237.861
32.62	239.427
32.64	240.735
32.66	241.528
32.68	242.302
32.7	244.074
32.72	247.058
32.74	248.665
32.76	243.575
32.78	237.81
32.8	238.716
32.82	239.504
32.84	239.387
32.86	242.634
32.88	247.434
32.9	253.514
32.92	256.903
32.94	257.261
32.96	256.731
32.98	257.075
33	257.316
33.02	256.446
33.04	253.307
33.06	251.826
33.08	254.196
33.1	256.289
33.12	258.799
33.14	261.392
33.16	261.721
33.18	261.361
33.2	259.57
33.22	259.906
33.24	261.817
33.26	261.445
33.28	261.916
33.3	260.721
33.32	260.635
33.34	261.566
33.36	260.277
33.38	258.725
33.4	259.117
33.42	257.349
33.44	255.444
33.46	254.674
33.48	254.367
33.5	254.565
33.52	259.984
33.54	259.78
33.56	254.972
33.58	257.144
33.6	259.991
33.62	261.036
33.64	263.642
33.66	264.227
33.68	264.806
33.7	265.834
33.72	266
33.74	267.746
33.76	269.268
33.78	268.705
33.8	269.906
33.82	269.853
33.84	269.759
33.86	271.806
33.88	272.214
33.9	275.031
33.92	278.263
33.94	278.386
33.96	279.052
33.98	278.384
34	275.906
34.02	274.52
34.04	276.536
34.06	280.018
34.08	279.654
34.1	275.478
34.12	271.413
34.14	274.693
34.16	276.496
34.18	274.491
34.2	275.624
34.22	276.031
34.24	272.783
34.26	271.677
34.28	273.609
34.3	273.067
34.32	271.394
34.34	274.438
34.36	278.935
34.38	278.454
34.4	277.032
34.42	278.464
34.44	280.316
34.46	279.724
34.48	280.818
34.5	283.948
34.52	287.017
34.54	288.342
34.56	284.544
34.58	281.688
34.6	283.097
34.62	285.725
34.64	289.646
34.66	290.683
34.68	289.799
34.7	290.583
34.72	290.813
34.74	288.475
34.76	285.453
34.78	285.194
34.8	286.42
34.82	287.56
34.84	288.827
34.86	292.39
34.88	293.402
34.9	289.893
34.92	291.627
34.94	295.62
34.96	295.913
34.98	294.52
35	295.11
35.02	297.475
35.04	295.611
35.06	296.614
35.08	298.991
35.1	298.405
35.12	299.534
35.14	299.505
35.16	297.77
35.18	297.757
35.2	299.482
35.22	297.215
35.24	292.766
35.26	291.774
35.28	289.347
35.3	286.396
35.32	286.362
35.34	290.414
35.36	293.204
35.38	294.727
35.4	297.338
35.42	296.555
35.44	295.359
35.46	294.286
35.48	296.143
35.5	297.435
35.52	296.743
35.54	299.45
35.56	301.889
35.58	302.072
35.6	300.825
35.62	300.743
35.64	302.036
35.66	301.32
35.68	297.888
35.7	298.349
35.72	300.256
35.74	299.702
35.76	301.082
35.78	302.536
35.8	300.221
35.82	300.075
35.84	300.752
35.86	302.709
35.88	304.793
35.9	302.381
35.92	298.51
35.94	297.707
35.96	302.198
35.98	305.202
36	300.063
36.02	298.409
36.04	300.908
36.06	303.119
36.08	306.316
36.1	305.116
36.12	300.981
36.14	301.373
36.16	305.712
36.18	307.691
36.2	308.724
36.22	307.573
36.24	306.963
36.26	308.118
36.28	308.487
36.3	311.589
36.32	313.855
36.34	312.706
36.36	311.876
36.38	315.188
36.4	315.156
36.42	312.094
36.44	312.241
36.46	309.876
36.48	309.521
36.5	314.337
36.52	318.029
36.54	316.561
36.56	312.563
36.58	313.421
36.6	315.346
36.62	313.931
36.64	314.738
36.66	318.02
36.68	318.993
36.7	317.485
36.72	314.714
36.74	312.951
36.76	313.276
36.78	317.882
36.8	322.84
36.82	324.578
36.84	324.599
36.86	324.771
36.88	324.255
36.9	325.793
36.92	325.741
36.94	321.8
36.96	322.4
36.98	325.346
37	326.378
37.02	329.118
37.04	326.402
37.06	323.351
37.08	325.448
37.1	327.659
37.12	328.523
37.14	327.139
37.16	326.067
37.18	329.335
37.2	328.869
37.22	328.077
37.24	332.389
37.26	333.228
37.28	334.598
37.3	333.44
37.32	330.442
37.34	331.036
37.36	331.557
37.38	333.482
37.4	336.111
37.42	337.27
37.44	338.105
37.46	336.782
37.48	333.274
37.5	330.837
37.52	331.964
37.54	332.469
37.56	331.399
37.58	333.081
37.6	337.15
37.62	338.231
37.64	338.136
37.66	339.522
37.68	338.276
37.7	334.56
37.72	334.53
37.74	336.617
37.76	338.559
37.78	340.536
37.8	338.997
37.82	341.408
37.84	346.897
37.86	344.081
37.88	342.105
37.9	344.725
37.92	341.971
37.94	339.199
37.96	342.243
37.98	338.074
38	333.807
38.02	332.246
38.04	331.208
38.06	333.052
38.08	334.764
38.1	335.552
38.12	336.914
38.14	337.608
38.16	338.97
38.18	341.457
38.2	344.159
38.22	345.571
38.24	343.402
38.26	337.638
38.28	334.198
38.3	337.221
38.32	340.226
38.34	339.546
38.36	340.23
38.38	337.607
38.4	336.911
38.42	339.969
38.44	342.614
38.46	340.512
38.48	337.174
38.5	337.033
38.52	337.455
38.54	337.289
38.56	338.765
38.58	339.521
38.6	339.939
38.62	339.986
38.64	340.237
38.66	339.113
38.68	336.851
38.7	339.342
38.72	344.294
38.74	344.05
38.76	344.539
38.78	346.461
38.8	342.608
38.82	340.798
38.84	344.106
38.86	344.266
38.88	343.13
38.9	346.251
38.92	346.347
38.94	346.013
38.96	346.754
38.98	347.005
39	348.882
39.02	349.481
39.04	349.144
39.06	348.076
39.08	348.248
39.1	348.939
39.12	348.109
39.14	351.228
39.16	354.44
39.18	350.948
39.2	345.885
39.22	345.459
39.24	346.93
39.26	349.731
39.28	350.093
39.3	346.827
39.32	345.392
39.34	347.198
39.36	349.574
39.38	351.045
39.4	352.483
39.42	353.408
39.44	349.811
39.46	346.107
39.48	349.671
39.5	355.384
39.52	350.444
39.54	341.925
39.56	339.772
39.58	340.164
39.6	343.638
39.62	345.807
39.64	342.857
39.66	341.494
39.68	344.798
39.7	346.577
39.72	346.699
39.74	346.522
39.76	346.616
39.78	347.625
39.8	348.283
39.82	344.093
39.84	340.466
39.86	338.577
39.88	339.348
39.9	342.436
39.92	342.68
39.94	342.633
39.96	341.587
[truncated: 501 more rows]

## Sheet: Fig5-figsupp1b
ATP_Conc.d	Rate_ATP.d	Rate_ATP_sd.d	GFit_Rate_ATP.x	GFit_Rate_ATP.d	Ton.d	Ton_sd.d	GFit_Ton.x	GFit_Ton.d	Off_Prob.d	Off_Prob_err.d	GFit_Off_Prob.x	GFit_Off_Prob.d
0.005	12.4	0.6	0.005	12.3898	0.23	0.02	0.005	0.233487	0.073	0.003	0.005	0.0719779
0.01	15.2	1.9	0.01	17.9624	0.16	0.02	0.01	0.162298	0.035	0.002	0.01	0.0372156
0.02	26.9	1.5	0.015	21.5525	0.13	0.01	0.015	0.138568	0.011	0.002	0.015	0.0250949
0.05	30.2	1.4	0.02	24.1248	0.11	0.01	0.02	0.126703	0.013	0.001	0.02	0.0189296
0.1	36.1	1.1	0.025	26.0833	0.1	0.01	0.025	0.119584	0.005	0.001	0.025	0.0151962
0.25	40.2	0.6	0.03	27.6362	0.1	0.01	0.03	0.114838	0.003	0.001	0.03	0.0126928
0.5	39.3	0.9	0.035	28.9041	0.07	0.01	0.035	0.111448	0.007	0.002	0.035	0.0108976
1	43.3	0.7	0.04	29.9628	0.1	0.01	0.04	0.108905	0.002	0.001	0.04	0.00954726
			0.045	30.8626			0.045	0.106928			0.045	0.00849468
			0.05	31.6385			0.05	0.105346			0.05	0.00765114
			0.055	32.3156			0.055	0.104051			0.055	0.00695999
			0.06	32.9125			0.06	0.102973			0.06	0.00638337
			0.065	33.4433			0.065	0.10206			0.065	0.00589498
			0.07	33.9189			0.07	0.101278			0.07	0.00547601
			0.075	34.3478			0.075	0.1006			0.075	0.00511265
			0.08	34.7369			0.08	0.100007			0.08	0.0047945
			0.085	35.0917			0.085	0.0994831			0.085	0.00451364
			0.09	35.4167			0.09	0.0990178			0.09	0.00426385
			0.095	35.7158			0.095	0.0986015			0.095	0.00404027
			0.1	35.992			0.1	0.0982268			0.1	0.00383896
			0.105	36.248			0.105	0.0978878			0.105	0.00365676
			0.11	36.4859			0.11	0.0975796			0.11	0.00349107
			0.115	36.7078			0.115	0.0972983			0.115	0.00333975
			0.12	36.9152			0.12	0.0970403			0.12	0.003201
			0.125	37.1096			0.125	0.096803			0.125	0.00307332
			0.13	37.2922			0.13	0.096584			0.13	0.00295543
			0.135	37.4642			0.135	0.0963812			0.135	0.00284626
			0.14	37.6263			0.14	0.0961928			0.14	0.00274486
			0.145	37.7796			0.145	0.0960175			0.145	0.00265044
			0.15	37.9247			0.15	0.0958538			0.15	0.0025623
			0.155	38.0623			0.155	0.0957007			0.155	0.00247983
			0.16	38.1929			0.16	0.0955572			0.16	0.0024025
			0.165	38.3172			0.165	0.0954224			0.165	0.00232985
			0.17	38.4356			0.17	0.0952955			0.17	0.00226147
			0.175	38.5485			0.175	0.0951758			0.175	0.00219699
			0.18	38.6563			0.18	0.0950628			0.18	0.00213608
			0.185	38.7594			0.185	0.0949559			0.185	0.00207846
			0.19	38.858			0.19	0.0948547			0.19	0.00202386
			0.195	38.9525			0.195	0.0947586			0.195	0.00197206
			0.2	39.0431			0.2	0.0946673			0.2	0.00192284
			0.205	39.1301			0.205	0.0945805			0.205	0.00187603
			0.21	39.2137			0.21	0.0944978			0.21	0.00183143
			0.215	39.2941			0.215	0.094419			0.215	0.00178891
			0.22	39.3715			0.22	0.0943437			0.22	0.00174832
			0.225	39.446			0.225	0.0942718			0.225	0.00170953
			0.23	39.5179			0.23	0.0942031			0.23	0.00167242
			0.235	39.5872			0.235	0.0941372			0.235	0.00163689
			0.24	39.6541			0.24	0.0940741			0.24	0.00160284
			0.245	39.7188			0.245	0.0940135			0.245	0.00157017
			0.25	39.7812			0.25	0.0939554			0.25	0.00153881
			0.255	39.8417			0.255	0.0938996			0.255	0.00150868
			0.26	39.9002			0.26	0.0938459			0.26	0.00147971
			0.265	39.9569			0.265	0.0937943			0.265	0.00145183
			0.27	40.0118			0.27	0.0937445			0.27	0.00142498
			0.275	40.065			0.275	0.0936966			0.275	0.0013991
			0.28	40.1167			0.28	0.0936503			0.28	0.00137415
			0.285	40.1668			0.285	0.0936057			0.285	0.00135007
			0.29	40.2154			0.29	0.0935627			0.29	0.00132682
			0.295	40.2627			0.295	0.0935211			0.295	0.00130436
			0.3	40.3087			0.3	0.0934808			0.3	0.00128265
			0.305	40.3534			0.305	0.0934419			0.305	0.00126164
			0.31	40.3968			0.31	0.0934043			0.31	0.00124132
			0.315	40.4391			0.315	0.0933678			0.315	0.00122164
			0.32	40.4803			0.32	0.0933325			0.32	0.00120257
			0.325	40.5204			0.325	0.0932983			0.325	0.00118409
			0.33	40.5595			0.33	0.0932651			0.33	0.00116617
			0.335	40.5976			0.335	0.0932329			0.335	0.00114878
			0.34	40.6347			0.34	0.0932017			0.34	0.0011319
			0.345	40.671			0.345	0.0931713			0.345	0.00111551
			0.35	40.7063			0.35	0.0931418			0.35	0.00109959
			0.355	40.7408			0.355	0.0931132			0.355	0.00108412
			0.36	40.7745			0.36	0.0930853			0.36	0.00106908
			0.365	40.8074			0.365	0.0930582			0.365	0.00105445
			0.37	40.8396			0.37	0.0930319			0.37	0.00104021
			0.375	40.871			0.375	0.0930062			0.375	0.00102636
			0.38	40.9017			0.38	0.0929813			0.38	0.00101286
			0.385	40.9317			0.385	0.0929569			0.385	0.000999722
			0.39	40.9611			0.39	0.0929332			0.39	0.000986917
			0.395	40.9898			0.395	0.0929101			0.395	0.000974435
			0.4	41.018			0.4	0.0928876			0.4	0.000962265
			0.405	41.0455			0.405	0.0928656			0.405	0.000950396
			0.41	41.0724			0.41	0.0928442			0.41	0.000938816
			0.415	41.0988			0.415	0.0928233			0.415	0.000927514
			0.42	41.1247			0.42	0.0928028			0.42	0.000916482
			0.425	41.15			0.425	0.0927829			0.425	0.000905708
			0.43	41.1749			0.43	0.0927634			0.43	0.000895185
			0.435	41.1992			0.435	0.0927444			0.435	0.000884904
			0.44	41.2231			0.44	0.0927258			0.44	0.000874857
			0.445	41.2465			0.445	0.0927076			0.445	0.000865034
			0.45	41.2695			0.45	0.0926898			0.45	0.00085543
			0.455	41.292			0.455	0.0926725			0.455	0.000846037
			0.46	41.3141			0.46	0.0926554			0.46	0.000836848
			0.465	41.3358			0.465	0.0926388			0.465	0.000827857
			0.47	41.3571			0.47	0.0926225			0.47	0.000819056
			0.475	41.378			0.475	0.0926066			0.475	0.000810441
			0.48	41.3985			0.48	0.092591			0.48	0.000802005
			0.485	41.4187			0.485	0.0925757			0.485	0.000793743
			0.49	41.4385			0.49	0.0925607			0.49	0.000785649
			0.495	41.458			0.495	0.092546			0.495	0.000777719
			0.5	41.4771			0.5	0.0925316			0.5	0.000769947
			0.505	41.4959			0.505	0.0925175			0.505	0.000762329
			0.51	41.5144			0.51	0.0925037			0.51	0.000754861
			0.515	41.5326			0.515	0.0924902			0.515	0.000747537
			0.52	41.5505			0.52	0.0924769			0.52	0.000740354
			0.525	41.5681			0.525	0.0924638			0.525	0.000733308
			0.53	41.5854			0.53	0.092451			0.53	0.000726394
			0.535	41.6024			0.535	0.0924385			0.535	0.00071961
			0.54	41.6191			0.54	0.0924262			0.54	0.000712951
			0.545	41.6356			0.545	0.0924141			0.545	0.000706415
			0.55	41.6518			0.55	0.0924022			0.55	0.000699997
			0.555	41.6678			0.555	0.0923905			0.555	0.000693695
			0.56	41.6835			0.56	0.0923791			0.56	0.000687505
			0.565	41.699			0.565	0.0923678			0.565	0.000681424
			0.57	41.7142			0.57	0.0923568			0.57	0.000675451
			0.575	41.7292			0.575	0.0923459			0.575	0.000669581
			0.58	41.744			0.58	0.0923353			0.58	0.000663812
			0.585	41.7586			0.585	0.0923248			0.585	0.000658142
			0.59	41.7729			0.59	0.0923144			0.59	0.000652568
			0.595	41.7871			0.595	0.0923043			0.595	0.000647087
			0.6	41.801			0.6	0.0922943			0.6	0.000641698
			0.605	41.8147			0.605	0.0922845			0.605	0.000636398
			0.61	41.8283			0.61	0.0922749			0.61	0.000631184
			0.615	41.8416			0.615	0.0922654			0.615	0.000626056
			0.62	41.8548			0.62	0.0922561			0.62	0.00062101
			0.625	41.8678			0.625	0.0922469			0.625	0.000616044
			0.63	41.8806			0.63	0.0922378			0.63	0.000611158
			0.635	41.8932			0.635	0.0922289			0.635	0.000606348
			0.64	41.9056			0.64	0.0922202			0.64	0.000601614
			0.645	41.9179			0.645	0.0922116			0.645	0.000596953
			0.65	41.93			0.65	0.0922031			0.65	0.000592363
			0.655	41.942			0.655	0.0921947			0.655	0.000587844
			0.66	41.9538			0.66	0.0921865			0.66	0.000583393
			0.665	41.9655			0.665	0.0921784			0.665	0.000579009
			0.67	41.9769			0.67	0.0921704			0.67	0.00057469
			0.675	41.9883			0.675	0.0921625			0.675	0.000570435
			0.68	41.9995			0.68	0.0921548			0.68	0.000566243
			0.685	42.0105			0.685	0.0921471			0.685	0.000562112
			0.69	42.0215			0.69	0.0921396			0.69	0.000558041
			0.695	42.0322			0.695	0.0921322			0.695	0.000554028
			0.7	42.0429			0.7	0.0921248			0.7	0.000550073
			0.705	42.0534			0.705	0.0921176			0.705	0.000546173
			0.71	42.0638			0.71	0.0921105			0.71	0.000542329
			0.715	42.074			0.715	0.0921035			0.715	0.000538538
			0.72	42.0842			0.72	0.0920966			0.72	0.0005348
			0.725	42.0942			0.725	0.0920898			0.725	0.000531114
			0.73	42.1041			0.73	0.092083			0.73	0.000527478
			0.735	42.1138			0.735	0.0920764			0.735	0.000523891
			0.74	42.1235			0.74	0.0920699			0.74	0.000520353
			0.745	42.133			0.745	0.0920634			0.745	0.000516862
			0.75	42.1425			0.75	0.092057			0.75	0.000513418
			0.755	42.1518			0.755	0.0920508			0.755	0.00051002
			0.76	42.161			0.76	0.0920446			0.76	0.000506666
			0.765	42.1701			0.765	0.0920384			0.765	0.000503356
			0.77	42.1791			0.77	0.0920324			0.77	0.000500089
			0.775	42.188			0.775	0.0920264			0.775	0.000496864
			0.78	42.1968			0.78	0.0920205			0.78	0.00049368
			0.785	42.2056			0.785	0.0920147			0.785	0.000490537
			0.79	42.2142			0.79	0.092009			0.79	0.000487434
			0.795	42.2227			0.795	0.0920033			0.795	0.00048437
			0.8	42.2311			0.8	0.0919977			0.8	0.000481344
			0.805	42.2394			0.805	0.0919922			0.805	0.000478355
			0.81	42.2477			0.81	0.0919867			0.81	0.000475404
			0.815	42.2558			0.815	0.0919813			0.815	0.000472489
			0.82	42.2639			0.82	0.091976			0.82	0.000469609
			0.825	42.2719			0.825	0.0919707			0.825	0.000466764
			0.83	42.2798			0.83	0.0919656			0.83	0.000463953
			0.835	42.2876			0.835	0.0919604			0.835	0.000461176
			0.84	42.2953			0.84	0.0919553			0.84	0.000458432
			0.845	42.3029			0.845	0.0919503			0.845	0.000455721
			0.85	42.3105			0.85	0.0919454			0.85	0.000453041
			0.855	42.318			0.855	0.0919405			0.855	0.000450393
			0.86	42.3254			0.86	0.0919356			0.86	0.000447775
			0.865	42.3328			0.865	0.0919308			0.865	0.000445188
			0.87	42.34			0.87	0.0919261			0.87	0.000442631
			0.875	42.3472			0.875	0.0919214			0.875	0.000440102
			0.88	42.3543			0.88	0.0919168			0.88	0.000437603
			0.885	42.3614			0.885	0.0919122			0.885	0.000435131
			0.89	42.3684			0.89	0.0919077			0.89	0.000432688
			0.895	42.3753			0.895	0.0919033			0.895	0.000430271
			0.9	42.3821			0.9	0.0918988			0.9	0.000427882
			0.905	42.3889			0.905	0.0918945			0.905	0.000425519
			0.91	42.3956			0.91	0.0918901			0.91	0.000423182
			0.915	42.4023			0.915	0.0918859			0.915	0.00042087
			0.92	42.4088			0.92	0.0918816			0.92	0.000418584
			0.925	42.4154			0.925	0.0918775			0.925	0.000416322
			0.93	42.4218			0.93	0.0918733			0.93	0.000414085
			0.935	42.4282			0.935	0.0918692			0.935	0.000411871
			0.94	42.4346			0.94	0.0918652			0.94	0.000409681
			0.945	42.4408			0.945	0.0918612			0.945	0.000407514
			0.95	42.4471			0.95	0.0918572			0.95	0.00040537
			0.955	42.4532			0.955	0.0918533			0.955	0.000403249
			0.96	42.4593			0.96	0.0918494			0.96	0.000401149
			0.965	42.4654			0.965	0.0918456			0.965	0.000399071
			0.97	42.4714			0.97	0.0918418			0.97	0.000397015
			0.975	42.4773			0.975	0.091838			0.975	0.00039498
			0.98	42.4832			0.98	0.0918343			0.98	0.000392965
			0.985	42.489			0.985	0.0918306			0.985	0.000390971
			0.99	42.4948			0.99	0.0918269			0.99	0.000388997
			0.995	42.5006			0.995	0.0918233			0.995	0.000387043
			1	42.5062			1	0.0918197			1	0.000385109

## Sheet: Fig5-figsupp2_AMPPNP_100uM
TBZc_MT_TC154035.x	TBZc_MT_TC154035.d
0	170.503
0.005	162.075
0.01	165.772
0.015	163.557
0.02	165.947
0.025	174.382
0.03	163.711
0.035	165.822
0.04	171.894
0.045	179.593
0.05	178.109
0.055	173.826
0.06	170.744
0.065	169.644
0.07	171.281
0.075	170.659
0.08	178.981
0.085	172.419
0.09	178.042
0.095	189.178
0.1	174.547
0.105	174.432
0.11	176.429
0.115	185.495
0.12	176.639
0.125	175.279
0.13	177.803
0.135	177.064
0.14	162.848
0.145	168.383
0.15	175.421
0.155	168.087
0.16	162.851
0.165	161.25
0.17	166.939
0.175	167.803
0.18	162.097
0.185	160.08
0.19	165.76
0.195	166.041
0.2	163.39
0.205	163.907
0.21	161.473
0.215	158.633
0.22	160.45
0.225	157.858
0.23	152.03
0.235	160.162
0.24	175.1
0.245	165.505
0.25	166.277
0.255	162.282
0.26	155.49
0.265	167.299
0.27	172.459
0.275	154.543
0.28	161.453
0.285	163.773
0.29	158.856
0.295	167.482
0.3	154.173
0.305	162.744
0.31	162.964
0.315	157.633
0.32	166.108
0.325	164.669
0.33	172.341
0.335	171.4
0.34	177.157
0.345	171.528
0.35	164.693
0.355	181.344
0.36	174.955
0.365	177.205
0.37	173.995
0.375	166.989
0.38	167.762
0.385	167.06
0.39	163.374
0.395	171.921
0.4	169.116
0.405	162.354
0.41	162.426
0.415	163.75
0.42	176.474
0.425	168.011
0.43	174.116
0.435	172.522
0.44	150.721
0.445	163.413
0.45	167.077
0.455	170.11
0.46	160.796
0.465	167.312
0.47	158.048
0.475	163.048
0.48	156.443
0.485	162.168
0.49	163.793
0.495	163.873
0.5	175.31
0.505	170.146
0.51	177.396
0.515	176.364
0.52	166.293
0.525	165.392
0.53	165.999
0.535	161.432
0.54	166.229
0.545	170.071
0.55	173.235
0.555	155.374
0.56	157.714
0.565	164.252
0.57	153.822
0.575	158.828
0.58	166.177
0.585	161.896
0.59	163.698
0.595	165.773
0.6	145.33
0.605	150.959
0.61	163.077
0.615	156.359
0.62	156.849
0.625	166.297
0.63	151.352
0.635	167.176
0.64	170.117
0.645	162.986
0.65	159.592
0.655	161.756
0.66	163.5
0.665	168.975
0.67	160.486
0.675	163.769
0.68	171.851
0.685	159.15
0.69	157.829
0.695	155.909
0.7	171.785
0.705	164.988
0.71	168.902
0.715	168.487
0.72	162.487
0.725	163.224
0.73	157.259
0.735	159.547
0.74	151.541
0.745	150.999
0.75	157.298
0.755	153.679
0.76	159.403
0.765	148.534
0.77	154.057
0.775	162.466
0.78	152.956
0.785	152.039
0.79	158.533
0.795	156.267
0.8	160.841
0.805	168.762
0.81	165.029
0.815	157.097
0.82	159.937
0.825	165.031
0.83	167.475
0.835	160.665
0.84	168.073
0.845	161.215
0.85	170.418
0.855	174.668
0.86	159.03
0.865	156.016
0.87	176.053
0.875	166.072
0.88	152.269
0.885	163.027
0.89	156.317
0.895	150.054
0.9	168.321
0.905	171.344
0.91	167.503
0.915	159.634
0.92	166.609
0.925	164.376
0.93	169.192
0.935	162.669
0.94	165.765
0.945	167.033
0.95	161.426
0.955	168.834
0.96	159.326
0.965	165.595
0.97	151.307
0.975	169.739
0.98	176.027
0.985	174.526
0.99	168.86
0.995	167.973
1	155.867
1.005	164.081
1.01	164.569
1.015	174.216
1.02	161.037
1.025	160.468
1.03	166.377
1.035	172.31
1.04	178.492
1.045	161.257
1.05	170.182
1.055	157.843
1.06	153.747
1.065	164.944
1.07	166.26
1.075	163.603
1.08	152.539
1.085	159.156
1.09	161.749
1.095	164.117
1.1	160.427
1.105	170.053
1.11	180.386
1.115	163.78
1.12	169.404
1.125	170.436
1.13	172.25
1.135	171.846
1.14	151.083
1.145	167.169
1.15	162.471
1.155	156.671
1.16	141.865
1.165	154.4
1.17	156.388
1.175	175.206
1.18	172.363
1.185	174.06
1.19	181.15
1.195	159.622
1.2	169.027
1.205	169.089
1.21	163.554
1.215	164.82
1.22	178.203
1.225	162.845
1.23	166.112
1.235	172.894
1.24	166.106
1.245	176.519
1.25	170.923
1.255	167.233
1.26	170.288
1.265	175.187
1.27	157.795
1.275	173.409
1.28	167.454
1.285	161.848
1.29	163.099
1.295	166.496
1.3	162.944
1.305	165.152
1.31	162.73
1.315	156.475
1.32	153.684
1.325	167.269
1.33	172.349
1.335	169.636
1.34	172.116
1.345	173.749
1.35	177.343
1.355	172.109
1.36	161.85
1.365	162.415
1.37	168.537
1.375	162.519
1.38	174.007
1.385	155.633
1.39	163.714
1.395	158.386
1.4	166.95
1.405	150.362
1.41	163.752
1.415	160.235
1.42	170.366
1.425	162.326
1.43	163.922
1.435	152.428
1.44	164.541
1.445	167.292
1.45	155.172
1.455	163.896
1.46	166.007
1.465	167.058
1.47	164.329
1.475	167.167
1.48	165.537
1.485	166.231
1.49	165.099
1.495	164.626
1.5	154.327
1.505	168.817
1.51	153.263
1.515	150.812
1.52	167.127
1.525	157.76
1.53	161.503
1.535	171.167
1.54	170.453
1.545	166.338
1.55	162.008
1.555	163.537
1.56	158.568
1.565	163.426
1.57	169.96
1.575	162.778
1.58	154.51
1.585	163.831
1.59	162.575
1.595	150.289
1.6	163.164
1.605	162.134
1.61	178.123
1.615	171.404
1.62	152.881
1.625	165.606
1.63	163.671
1.635	154.284
1.64	161.578
1.645	158.112
1.65	160.802
1.655	159.963
1.66	155.427
1.665	158.912
1.67	158.764
1.675	149.587
1.68	164.133
1.685	164.817
1.69	165.137
1.695	161.992
1.7	155.338
1.705	158.268
1.71	168.841
1.715	175.013
1.72	165.096
1.725	168.45
1.73	162.57
1.735	154.098
1.74	170.808
1.745	163.196
1.75	173.706
1.755	170.979
1.76	164.975
1.765	158.457
1.77	152.325
1.775	161.211
1.78	166.796
1.785	162.942
1.79	166.735
1.795	147.759
1.8	163.281
1.805	165.125
1.81	172.839
1.815	163.07
1.82	164.24
1.825	164.06
1.83	163.728
1.835	170.692
1.84	172.741
1.845	173.106
1.85	167.039
1.855	174.767
1.86	172.305
1.865	165.971
1.87	164.399
1.875	167.524
1.88	168.831
1.885	174.541
1.89	172.142
1.895	165.648
1.9	158.199
1.905	152.021
1.91	162.338
1.915	170.931
1.92	167.149
1.925	166.549
1.93	168.951
1.935	183.686
1.94	170.298
1.945	162.976
1.95	173.417
1.955	168.45
1.96	162.896
1.965	172.085
1.97	169.308
1.975	165.492
1.98	161.788
1.985	165.393
1.99	178.238
1.995	172.705
2	164.376
2.005	157.28
2.01	175.464
2.015	172.934
2.02	168.163
2.025	163.155
2.03	163.316
2.035	169.136
2.04	174.513
2.045	157.32
2.05	161.469
2.055	172.338
2.06	170.09
2.065	170.935
2.07	164.165
2.075	165.509
2.08	151.331
2.085	159.859
2.09	158.933
2.095	172.903
2.1	161.129
2.105	167.933
2.11	161.305
2.115	173.922
2.12	173.245
2.125	163.472
2.13	165.394
2.135	166.376
2.14	166.845
2.145	158.377
2.15	153.22
2.155	167.075
2.16	158.466
2.165	156.84
2.17	161.147
2.175	162.23
2.18	156.831
2.185	167.604
2.19	159.219
2.195	164.955
2.2	160.999
2.205	154.551
2.21	157.003
2.215	169.322
2.22	166.278
2.225	166.677
2.23	164.306
2.235	170.298
2.24	163.311
2.245	159.383
2.25	153.466
2.255	168.97
2.26	164.963
2.265	156.337
2.27	163.799
2.275	171.501
2.28	164.307
2.285	155.64
2.29	156.773
2.295	163.585
2.3	169.462
2.305	164.806
2.31	167.551
2.315	160.333
2.32	163.17
2.325	161.061
2.33	163.937
2.335	171.79
2.34	167.687
2.345	153.169
2.35	169.693
2.355	166.739
2.36	162.363
2.365	173.394
2.37	177.953
2.375	167.122
2.38	168.047
2.385	173.308
2.39	160.269
2.395	175.512
2.4	171.56
2.405	157.877
2.41	143.344
2.415	149.863
2.42	162.724
2.425	166.502
2.43	169.903
2.435	162.154
2.44	152.738
2.445	163.357
2.45	157.703
2.455	163.806
2.46	162.153
2.465	161.41
2.47	165.805
2.475	166.744
2.48	158.534
2.485	157.776
2.49	163.62
2.495	163.17
2.5	167.926
2.505	158.376
2.51	168.155
2.515	161.149
2.52	166.696
2.525	173.583
2.53	156.289
2.535	165.158
2.54	168.453
2.545	161.31
2.55	157.415
2.555	166.168
2.56	166.088
2.565	167.596
2.57	161.796
2.575	161.252
2.58	150.823
2.585	157.231
2.59	153.317
2.595	164.235
2.6	166.337
2.605	150.654
2.61	154.702
2.615	161.055
2.62	158.171
2.625	161.685
2.63	164.019
2.635	163.773
2.64	166.753
2.645	167.806
2.65	161.77
2.655	164.891
2.66	167.655
2.665	166.744
2.67	170.393
2.675	163.472
2.68	177.909
2.685	171.49
2.69	165.827
2.695	163.748
2.7	169.504
2.705	163.862
2.71	165.235
2.715	164.656
2.72	171.492
2.725	170.694
2.73	162.029
2.735	162.386
2.74	170.562
2.745	177.025
2.75	172.843
2.755	166.447
2.76	166.762
2.765	169.152
2.77	172.635
2.775	158.757
2.78	168.186
2.785	161.321
2.79	153.274
2.795	167.439
2.8	162
2.805	160.36
2.81	171.364
2.815	169.57
2.82	158.872
2.825	159.648
2.83	155.543
2.835	169.51
2.84	169.21
2.845	164.383
2.85	175.694
2.855	181.085
2.86	161.406
2.865	156.906
2.87	159.636
2.875	160.782
2.88	149.303
2.885	146.758
2.89	166.485
2.895	161.872
2.9	163.796
2.905	169.022
2.91	170.967
2.915	164.912
2.92	162.949
2.925	160.403
2.93	163.066
2.935	164.502
2.94	161.814
2.945	151.862
2.95	161.41
2.955	159.495
2.96	165.332
2.965	168.553
2.97	165.363
2.975	164.298
2.98	160.785
2.985	163.191
2.99	163.275
2.995	164.905
3	168.973
3.005	165.967
3.01	162.73
3.015	159.833
3.02	171.829
3.025	166.808
3.03	157.187
3.035	153.862
3.04	153.542
3.045	155.568
3.05	161.344
3.055	173.07
3.06	168.092
3.065	172.398
3.07	173.701
3.075	160.415
3.08	165.793
3.085	177.904
3.09	180.889
3.095	170.74
3.1	162.89
3.105	161.533
3.11	158.221
3.115	170.992
3.12	158.353
3.125	164.025
3.13	156.929
3.135	164.167
3.14	159.043
3.145	158.239
3.15	164.373
3.155	165.208
3.16	155.13
3.165	163.797
3.17	158.617
3.175	155.929
3.18	167.455
3.185	152.06
3.19	158.657
3.195	167.532
3.2	164.333
3.205	170.728
3.21	163.151
3.215	160.45
3.22	163.248
3.225	171.409
3.23	167.155
3.235	168.992
3.24	165.3
3.245	158.486
3.25	173.199
3.255	161.325
3.26	171.237
3.265	166.781
3.27	169.741
3.275	172.205
3.28	157.417
3.285	166.619
3.29	160.028
3.295	163.296
3.3	170.422
3.305	156.076
3.31	166.893
3.315	176.591
3.32	175.413
3.325	167.531
3.33	170.243
3.335	158.64
3.34	167.138
3.345	170.037
3.35	169.916
3.355	159.948
3.36	170.984
3.365	168.837
3.37	166.357
3.375	157.743
3.38	158.261
3.385	166.931
3.39	181.976
3.395	177.125
3.4	164.189
3.405	157.01
3.41	153.559
3.415	153.267
3.42	159.205
3.425	161.227
3.43	163.566
3.435	167.87
3.44	164.361
3.445	163.971
3.45	171.216
3.455	177.117
3.46	171.295
3.465	173.824
3.47	173.42
3.475	180.373
3.48	178.797
3.485	169.717
3.49	156.086
3.495	168.865
3.5	161.759
3.505	177.52
3.51	166.649
3.515	166.13
3.52	165.515
3.525	168.778
3.53	168.645
3.535	155.223
3.54	157.277
3.545	173.458
3.55	171.196
3.555	175.259
3.56	173.846
3.565	175.358
3.57	166.757
3.575	161.968
3.58	163.958
3.585	176.117
3.59	171.387
3.595	177.664
3.6	172.177
3.605	172.391
3.61	174.169
3.615	171.147
3.62	163.705
3.625	176.749
3.63	172.036
3.635	168.429
3.64	160.294
3.645	170.473
3.65	178.235
3.655	175.829
3.66	168.444
3.665	179.63
3.67	179.067
3.675	153.73
3.68	170.568
3.685	166.001
3.69	156.949
3.695	148.722
3.7	166.56
3.705	164.059
3.71	165.424
3.715	144.311
3.72	146.859
3.725	164.05
3.73	166.854
3.735	168.182
3.74	159.099
3.745	167.581
3.75	147.167
3.755	150.308
3.76	156.17
3.765	157.176
3.77	159.578
3.775	160.478
3.78	152.413
3.785	154.512
3.79	163.221
3.795	161.297
3.8	172
3.805	163.327
3.81	154.315
3.815	162.938
3.82	161.589
3.825	162.495
3.83	164.478
3.835	152.442
3.84	168.581
3.845	180.892
3.85	171.886
3.855	166.334
3.86	166.079
3.865	150.851
3.87	158.414
3.875	160.417
3.88	164.923
3.885	163.215
3.89	165.043
3.895	169.045
3.9	154.232
3.905	155.337
3.91	169.214
3.915	179.915
3.92	150.959
3.925	170.1
3.93	169.332
3.935	164.422
3.94	175.902
3.945	175.374
3.95	163.256
3.955	159.002
3.96	155.857
3.965	155.823
3.97	160.708
3.975	160.684
3.98	165.685
3.985	165.976
3.99	172.948
3.995	162.529
4	155.823
4.005	150.002
4.01	159.081
4.015	152.296
4.02	141.366
4.025	155.347
4.03	141.468
4.035	150.328
4.04	152.62
4.045	155.854
4.05	157.327
4.055	162.879
4.06	163.573
4.065	162.321
4.07	152.101
4.075	169.505
4.08	168.415
4.085	169.623
4.09	158.663
4.095	162.81
4.1	177.166
4.105	176.474
4.11	165.118
4.115	158.222
4.12	149.509
4.125	143.881
4.13	167.322
4.135	157.84
4.14	159.963
4.145	155.623
4.15	159.341
4.155	163.205
4.16	166.548
4.165	151.367
4.17	170.676
4.175	160.801
4.18	162.548
4.185	170.287
4.19	156.052
4.195	173.577
4.2	177.216
4.205	177.506
4.21	172.038
4.215	173.069
4.22	169.049
4.225	167.337
4.23	169.523
4.235	174.104
4.24	174.732
4.245	185.106
4.25	168.935
4.255	171.56
4.26	169.432
4.265	167.961
4.27	177.096
4.275	185.641
4.28	177.859
4.285	176.829
4.29	165.027
4.295	168
4.3	166.548
4.305	163.455
4.31	168.908
4.315	165.059
4.32	166.525
4.325	164.707
4.33	170.191
4.335	175.801
4.34	169.915
4.345	162.344
4.35	157.247
4.355	175.622
4.36	169.855
4.365	171.949
4.37	168.318
4.375	151.615
4.38	161.368
4.385	161.922
4.39	168.052
4.395	165.029
4.4	187.384
4.405	175.896
4.41	158.475
4.415	159.479
4.42	161.222
4.425	172.647
4.43	165.397
4.435	169.792
4.44	177.099
4.445	171.701
4.45	166.977
4.455	178.074
4.46	176.628
4.465	163.078
4.47	175.09
4.475	165.894
4.48	164.954
4.485	162.404
4.49	162.892
4.495	169.977
4.5	180.754
4.505	168.209
4.51	161.629
4.515	151.216
4.52	168.264
4.525	180.257
4.53	166.478
4.535	171.22
4.54	188.224
4.545	169.892
4.55	168.303
4.555	165.855
4.56	171.029
4.565	163.647
4.57	164.304
4.575	164.567
4.58	167.317
4.585	182.413
4.59	178.725
4.595	169.892
4.6	171.33
4.605	170.615
4.61	168.763
4.615	167.601
4.62	171.331
4.625	170.122
4.63	167.911
4.635	177.814
4.64	183.856
4.645	170.494
4.65	176.037
4.655	170.933
4.66	161.578
4.665	167.446
4.67	179.398
4.675	171.109
4.68	175.246
4.685	159.992
4.69	173.337
4.695	162.966
4.7	152.849
4.705	168.886
4.71	180.227
4.715	166.88
4.72	169.093
4.725	168.865
4.73	167.183
4.735	177.882
4.74	167.47
4.745	161.285
4.75	160.446
4.755	154.153
4.76	166.074
4.765	170.179
4.77	167.727
4.775	169.245
4.78	166.094
4.785	164.674
4.79	170.25
4.795	160.161
4.8	171.31
4.805	167.056
4.81	169.664
4.815	167.615
4.82	152.349
4.825	158.251
4.83	169.958
4.835	165.292
4.84	166.951
4.845	170.873
4.85	160.259
4.855	167.607
4.86	168.235
4.865	162.471
4.87	152.781
4.875	165.498
4.88	176.577
4.885	173.121
4.89	168.045
4.895	159.819
4.9	170.379
4.905	171.632
4.91	171.193
4.915	158.476
4.92	166.414
4.925	171.36
4.93	167.704
4.935	168.79
4.94	169.171
4.945	167.96
4.95	176.329
4.955	162.112
4.96	148.618
4.965	69.5986
4.97	22.2596
4.975	18.3778
4.98	13.8627
4.985	19.3325
4.99	18.8316
4.995	10.4918
5	14.1293
5.005	14.0345
5.01	12.7951
5.015	16.1831
5.02	12.4551
5.025	7.51228
5.03	12.0949
5.035	6.20079
5.04	11.4204
5.045	12.9398
5.05	20.8786
5.055	18.3716
5.06	15.2106
5.065	16.3348
5.07	14.1401
5.075	18.0385
5.08	15.1462
5.085	7.66746
5.09	4.56925
5.095	13.1099
5.1	17.9354
5.105	15.0588
5.11	17.2155
5.115	23.551
5.12	19.8854
5.125	19.7301
5.13	21.5237
5.135	21.0313
5.14	18.0617
5.145	17.2472
5.15	15.782
5.155	10.7076
5.16	15.3188
5.165	7.31298
5.17	7.71406
5.175	-1.51893
5.18	-2.41188
5.185	10.6965
5.19	11.7204
5.195	11.8956
5.2	10.9897
5.205	8.27263
5.21	3.34206
5.215	3.81327
5.22	-0.602159
5.225	-7.61373
5.23	1.985
5.235	4.38564
5.24	16.4703
5.245	15.4598
5.25	3.96548
5.255	8.45267
5.26	5.24297
5.265	10.2229
5.27	5.7609
5.275	-5.58463
5.28	9.8328
5.285	1.2276
5.29	7.50718
5.295	9.25069
5.3	7.80727
5.305	12.7105
5.31	2.75509
5.315	-0.222571
5.32	5.9262
5.325	3.59158
5.33	11.5924
5.335	6.38029
5.34	4.14067
5.345	14.2545
5.35	16.4163
5.355	19.8911
5.36	6.13162
5.365	8.81383
5.37	3.66582
5.375	9.26236
5.38	8.68691
5.385	4.5997
5.39	12.7661
5.395	18.3323
5.4	13.7166
5.405	12.1804
5.41	7.18742
5.415	-1.41308
5.42	-1.51992
5.425	13.5715
5.43	12.9026
5.435	15.5537
5.44	7.43871
5.445	4.30984
5.45	10.1113
5.455	11.6024
5.46	9.05844
5.465	19.5814
5.47	8.76592
5.475	1.39466
5.48	5.17206
5.485	4.91111
5.49	8.10481
5.495	7.78069
5.5	13.4709
5.505	13.9167
5.51	13.6222
5.515	9.83383
5.52	3.73534
5.525	7.29122
5.53	13.9838
5.535	9.71701
5.54	3.78284
5.545	5.16638
5.55	9.21018
5.555	10.8443
5.56	7.92575
5.565	6.49092
5.57	8.83052
5.575	14.8224
5.58	15.3717
5.585	13.2184
5.59	11.2273
5.595	18.9769
5.6	12.8349
5.605	17.3131
5.61	7.93608
5.615	9.42434
5.62	14.248
5.625	7.07077
5.63	12.7419
5.635	8.37504
5.64	7.42624
5.645	6.47734
5.65	6.65553
5.655	8.73973
5.66	7.78699
5.665	1.73778
5.67	11.3565
5.675	17.0492
5.68	26.5859
5.685	12.6376
5.69	10.1911
5.695	17.1363
5.7	1.50971
5.705	10.4108
5.71	10.0947
5.715	3.41662
5.72	4.84676
5.725	0.236632
5.73	11.9212
5.735	16.1177
5.74	10.1987
5.745	12.1008
5.75	13.2408
5.755	10.324
5.76	9.94782
5.765	16.7887
5.77	11.2496
5.775	8.69451
5.78	6.18678
5.785	2.51373
5.79	7.63204
5.795	9.96059
5.8	1.43116
5.805	6.79517
5.81	14.984
5.815	7.4938
5.82	4.33291
5.825	-1.33409
5.83	6.13161
5.835	10.6969
5.84	0.301707
5.845	8.26207
5.85	9.14449
5.855	12.7564
5.86	10.1955
5.865	12.0731
5.87	11.6483
5.875	0.598192
5.88	4.37217
5.885	16.2488
5.89	6.57862
5.895	6.62111
5.9	2.6892
5.905	-4.68987
5.91	9.9648
5.915	8.02233
5.92	8.44857
5.925	6.27923
5.93	10.0332
5.935	10.175
5.94	6.03512
5.945	-0.287631
5.95	11.1575
5.955	13.9701
5.96	20.5814
5.965	14.3498
5.97	11.3114
5.975	4.91923
5.98	-0.562198
5.985	7.29205
5.99	15.1083
5.995	15.5535
6	4.2528
6.005	0.571006
6.01	3.51472
6.015	12.5383
6.02	13.0175
6.025	9.73668
6.03	9.77418
6.035	3.85734
6.04	-3.19862
6.045	5.02717
6.05	8.14962
6.055	8.93116
6.06	12.2267
6.065	10.2588
6.07	5.70464
6.075	10.3532
6.08	14.7986
6.085	17.6211
6.09	12.7516
6.095	14.825
6.1	14.8094
6.105	16.2564
6.11	16.773
6.115	19.6428
6.12	20.0984
6.125	8.93384
6.13	1.94064
6.135	3.3858
6.14	7.01762
6.145	6.53366
6.15	13.0509
6.155	18.0978
6.16	7.39177
6.165	16.0417
6.17	5.37712
6.175	3.35875
6.18	9.78389
6.185	10.1396
6.19	3.0776
6.195	4.45425
6.2	8.40924
6.205	15.9092
6.21	6.84728
6.215	10.0063
6.22	8.21051
6.225	8.41129
6.23	1.34405
6.235	5.81908
6.24	2.40647
6.245	8.77868
6.25	9.74493
6.255	17.3043
6.26	16.8177
6.265	9.6485
6.27	9.74893
6.275	7.79556
6.28	0.937182
6.285	5.09717
6.29	5.5801
6.295	17.31
6.3	4.24739
6.305	11.9267
6.31	19.7284
6.315	17.4069
6.32	14.0086
6.325	10.9612
6.33	9.58711
6.335	20.1131
6.34	18.3814
6.345	14.3411
6.35	8.11815
6.355	15.1558
6.36	14.5269
6.365	15.5083
6.37	17.9443
6.375	7.10295
6.38	15.9213
6.385	16.32
6.39	12.0559
6.395	3.09126
6.4	-2.51055
6.405	-3.70027
6.41	0.150879
6.415	7.79524
6.42	2.56544
6.425	9.34802
6.43	12.5139
6.435	8.4852
6.44	7.66366
6.445	2.31327
6.45	5.12589
6.455	9.71855
6.46	11.3035
6.465	-4.37306
6.47	-1.44615
6.475	-0.0501572
6.48	14.2669
6.485	12.3722
6.49	8.82465
6.495	16.9786
6.5	9.51387
6.505	11.6526
6.51	9.38549
6.515	8.23735
6.52	-0.262484
6.525	8.75934
6.53	7.85173
6.535	12.1684
6.54	1.66423
6.545	6.13801
6.55	10.6657
6.555	-0.145652
6.56	9.38912
6.565	14.8022
6.57	19.5924
6.575	9.56786
6.58	12.927
6.585	4.13181
6.59	10.8375
6.595	18.2922
6.6	12.0573
6.605	17.9444
6.61	9.27507
6.615	7.63399
6.62	3.65157
6.625	8.75671
6.63	16.4132
6.635	1.81082
6.64	7.80159
6.645	1.86074
6.65	-1.63733
6.655	5.58521
6.66	7.70035
6.665	8.83299
6.67	8.49715
6.675	18.6843
6.68	11.9284
6.685	2.05264
6.69	14.1375
6.695	9.60183
6.7	12.5449
6.705	10.5851
6.71	7.38075
6.715	0.775304
6.72	7.09462
6.725	-0.36184
6.73	2.00162
6.735	7.80191
6.74	5.50616
6.745	2.54738
6.75	2.21253
6.755	5.96583
6.76	2.19127
6.765	11.6422
6.77	2.72122
6.775	11.501
6.78	14.9132
6.785	13.3199
6.79	-0.0309492
6.795	6.23697
6.8	14.0008
6.805	7.71941
6.81	6.27022
6.815	6.67555
6.82	13.6708
6.825	9.90542
6.83	3.36584
6.835	10.4425
6.84	2.76814
6.845	15.8034
6.85	11.717
6.855	-0.963955
6.86	0.814526
6.865	2.78586
6.87	5.36117
6.875	-2.64279
6.88	1.27513
6.885	4.53203
6.89	13.7678
6.895	12.6829
6.9	12.3941
6.905	9.65135
6.91	12.0591
6.915	13.0618
6.92	10.5001
6.925	10.7186
6.93	12.9778
6.935	9.09359
6.94	7.30128
6.945	0.329604
6.95	-1.66289
6.955	10.3955
6.96	-1.98476
6.965	3.1257
6.97	7.49787
6.975	8.44408
6.98	7.18229
6.985	2.24868
6.99	6.09564
6.995	9.73773
7	7.28781
7.005	10.1253
7.01	1.62881
7.015	5.62044
7.02	11.2907
7.025	8.88979
7.03	4.90221
7.035	11.8587
7.04	-0.477205
7.045	11.7518
7.05	14.6986
7.055	15.0424
7.06	9.18
7.065	11.4397
7.07	11.1862
7.075	-1.39007
7.08	14.565
7.085	9.10355
7.09	4.78523
7.095	9.28651
7.1	2.74754
7.105	13.7723
7.11	12.2434
7.115	16.4448
7.12	18.4823
7.125	17.1352
7.13	7.26055
7.135	6.0428
7.14	9.52585
7.145	11.4783
7.15	14.1584
7.155	6.92544
7.16	10.2722
7.165	16.3528
7.17	19.5184
7.175	-0.43603
7.18	-2.92331
7.185	-0.0849686
7.19	6.56834
7.195	9.6059
7.2	18.933
7.205	7.80019
7.21	11.3773
7.215	9.67545
7.22	5.15356
7.225	0.140137
7.23	-4.40824
7.235	2.90472
7.24	4.66068
7.245	4.71963
7.25	-0.989834
7.255	6.99724
7.26	2.70542
7.265	7.43917
7.27	8.60895
7.275	15.0478
7.28	12.8998
7.285	17.3842
7.29	22.9144
7.295	13.4871
7.3	12.4118
7.305	12.5016
7.31	9.71481
7.315	9.07455
7.32	15.8498
7.325	7.04887
7.33	14.2448
7.335	7.70137
7.34	11.1187
7.345	12.6232
7.35	18.9869
7.355	1.87774
7.36	15.4118
7.365	18.8207
7.37	10.9936
7.375	10.5159
7.38	11.5133
7.385	13.5239
7.39	6.1243
7.395	14.2657
7.4	9.97241
7.405	6.39591
7.41	7.95501
7.415	12.3527
7.42	9.09767
7.425	15.7465
7.43	14.6139
7.435	3.7802
7.44	18.5879
7.445	18.3989
7.45	14.8041
7.455	10.5578
7.46	14.4646
7.465	15.8096
7.47	10.7584
7.475	15.3138
7.48	27.9126
7.485	22.6105
7.49	5.61431
7.495	9.51923
7.5	11.367
7.505	9.19139
7.51	5.69714
7.515	12.6597
7.52	15.8258
7.525	21.3288
7.53	14.1006
7.535	18.6443
7.54	13.0463
7.545	5.71976
7.55	15.2005
7.555	8.2978
7.56	6.28279
7.565	7.11216
7.57	11.1211
7.575	22.7772
7.58	17.8947
7.585	12.7693
7.59	4.49748
7.595	15.1294
7.6	21.5178
7.605	14.7532
7.61	17.7096
7.615	18.6879
7.62	20.0335
7.625	11.7
7.63	14.3614
7.635	21.332
7.64	14.8212
7.645	13.5808
7.65	19.1503
7.655	17.6353
7.66	11.32
7.665	16.0897
7.67	9.13475
7.675	18.8072
7.68	10.5502
7.685	4.27938
7.69	15.7566
7.695	15.8418
7.7	18.4774
7.705	1.21891
7.71	11.9955
7.715	12.185
7.72	12.1136
7.725	14.2654
7.73	24.7991
7.735	19.0852
7.74	15.4386
7.745	11.8622
7.75	16.3668
7.755	19.3049
7.76	22.1321
7.765	11.957
7.77	13.0731
7.775	6.57562
7.78	7.75067
7.785	8.96694
7.79	0.72492
7.795	16.2321
7.8	15.3387
7.805	9.77548
7.81	5.86166
7.815	12.0695
7.82	16.7329
7.825	14.3834
7.83	17.5293
7.835	11.4455
7.84	18.6287
7.845	13.2442
7.85	9.92348
7.855	13.131
7.86	20.6129
7.865	13.3809
7.87	18.7118
7.875	18.4504
7.88	10.8707
7.885	2.06853
7.89	20.1326
7.895	1.75111
7.9	3.16539
7.905	16.6278
7.91	11.0391
7.915	6.47328
7.92	11.6746
7.925	10.349
7.93	16.5122
7.935	14.5515
7.94	10.2876
7.945	10.7285
7.95	6.12898
7.955	7.38906
7.96	12.1711
7.965	17.3381
7.97	19.4168
7.975	15.0921
7.98	11.3702
7.985	8.55798
7.99	16.9812
7.995	16.7701
8	16.9998
8.005	12.851
8.01	22.1244
8.015	14.2398
8.02	10.3762
8.025	20.9633
8.03	15.3365
8.035	14.8658
8.04	10.8206
8.045	12.4508
8.05	5.53528
8.055	6.71555
8.06	18.2608
8.065	16.1011
8.07	14.3697
8.075	17.5875
8.08	13.0133
8.085	8.8151
8.09	7.78672
8.095	14.4018
8.1	10.5598
8.105	1.37916
8.11	9.78596
8.115	18.3494
8.12	3.39364
8.125	18.9153
8.13	14.3415
8.135	15.5618
8.14	16.1821
8.145	19.6694
8.15	19.6432
8.155	11.2484
8.16	4.88231
8.165	11.7387
8.17	20.9731
8.175	9.85957
8.18	12.5177
8.185	21.553
8.19	15.4953
8.195	13.5006
8.2	18.6813
8.205	11.19
8.21	14.0831
8.215	13.3401
8.22	4.08031
8.225	15.0968
8.23	16.9552
8.235	5.60078
8.24	0.320351
8.245	2.98664
8.25	-0.686819
8.255	3.6038
8.26	-3.49154
8.265	1.69837
8.27	2.75303
8.275	11.6786
8.28	10.3727
8.285	21.544
8.29	8.27739
8.295	6.00208
8.3	5.68265
8.305	6.83355
8.31	7.29553
8.315	8.20799
8.32	2.59982
8.325	-1.3522
8.33	-0.685242
8.335	4.79975
8.34	11.5457
8.345	16.2336
8.35	10.3522
8.355	11.6539
8.36	16.5922
8.365	3.60951
8.37	10.9681
8.375	12.6174
8.38	11.2169
8.385	11.7592
8.39	7.42482
8.395	10.7791
8.4	7.1313
8.405	6.41369
8.41	7.76036
8.415	6.32511
8.42	2.18355
8.425	0.896342
8.43	3.02417
8.435	11.1085
8.44	10.4358
8.445	7.08403
8.45	10.3817
8.455	12.3722
8.46	8.77694
8.465	-2.20254
8.47	4.67635
8.475	0.795277
8.48	2.05949
8.485	9.60353
8.49	4.65193
8.495	11.6396
8.5	16.9628
8.505	3.76636
8.51	5.06881
8.515	7.32355
8.52	4.80379
8.525	14.2788
8.53	4.92061
8.535	0.62174
8.54	10.6291
8.545	3.95619
8.55	7.85388
8.555	1.18798
8.56	-0.244409
8.565	1.36349
8.57	5.11349
8.575	2.67199
8.58	7.42338
8.585	2.87368
8.59	12.7921
8.595	-2.72516
8.6	9.33574
8.605	11.3
8.61	7.94159
8.615	12.6422
8.62	7.06766
8.625	3.74613
8.63	4.6061
8.635	11.3519
8.64	10.0951
8.645	12.1384
8.65	19.6153
8.655	14.5346
8.66	13.7925
8.665	21.5061
8.67	13.8457
8.675	11.8063
8.68	2.43037
8.685	9.24612
8.69	13.3352
8.695	9.40164
8.7	25.3028
8.705	22.4121
8.71	9.87778
8.715	5.84698
8.72	20.0543
8.725	14.5281
8.73	3.6148
8.735	8.4486
8.74	8.86141
8.745	3.18517
8.75	12.3855
8.755	10.7761
8.76	12.5144
8.765	21.8529
8.77	16.139
8.775	7.24815
8.78	1.78176
8.785	10.6211
8.79	14.8436
8.795	16.3328
8.8	12.9529
8.805	10.821
8.81	12.1265
8.815	12.4176
8.82	13.7767
8.825	19.4313
8.83	4.00203
8.835	9.93515
8.84	16.9784
8.845	5.72658
8.85	6.1204
8.855	13.8072
8.86	9.91892
8.865	10.507
8.87	7.54631
8.875	5.30507
8.88	13.4675
8.885	7.28121
8.89	7.56
8.895	4.25212
8.9	14.5575
8.905	8.42222
8.91	10.5053
8.915	7.02453
8.92	22.9174
8.925	21.1666
8.93	7.31057
8.935	12.0024
8.94	15.0597
8.945	18.7788
8.95	17.7027
8.955	20.4972
8.96	20.8998
8.965	7.8126
8.97	4.3681
8.975	1.08271
8.98	1.53785
8.985	13.8364
8.99	-0.191637
8.995	2.75003
9	6.88946
9.005	11.1178
9.01	1.60292
9.015	-5.41708
9.02	-3.77924
9.025	0.343209
9.03	10.0941
9.035	5.99937
9.04	16.728
9.045	13.8468
9.05	9.60298
9.055	10.8614
9.06	7.66196
9.065	8.79435
9.07	4.21912
9.075	10.8833
9.08	9.89732
9.085	14.6705
9.09	6.11073
9.095	9.78839
9.1	16.0164
9.105	19.6845
9.11	8.06086
9.115	5.05817
9.12	5.47902
9.125	13.4406
9.13	15.9726
9.135	18.2284
9.14	20.0812
9.145	17.8386
9.15	18.4802
9.155	13.0241
9.16	15.4508
9.165	10.2412
9.17	13.2255
9.175	10.0779
9.18	17.7057
9.185	4.13904
9.19	8.55444
9.195	2.07304
9.2	7.9689
9.205	11.2567
9.21	8.54839
9.215	10.8706
9.22	15.0957
9.225	10.7421
9.23	7.01867
9.235	7.49777
9.24	9.9886
9.245	11.3011
9.25	6.61002
9.255	0.0477493
9.26	6.0838
9.265	11.6536
9.27	10.7445
9.275	17.1286
9.28	13.3079
9.285	18.9489
9.29	12.8189
9.295	13.682
9.3	16.8544
9.305	16.0802
9.31	14.9469
9.315	12.0973
9.32	15.982
9.325	19.284
9.33	12.0915
9.335	13.5737
9.34	19.734
9.345	11.7862
9.35	21.849
9.355	16.0796
9.36	11.6465
9.365	11.2102
9.37	10.0117
9.375	11.4896
9.38	12.8636
9.385	13.7926
9.39	15.7035
9.395	21.9648
9.4	23.82
9.405	19.0898
9.41	9.89252
9.415	0.353557
9.42	13.5623
9.425	17.8963
9.43	12.8576
9.435	18.6927
9.44	22.1708
9.445	15.1582
9.45	22.8118
9.455	16.9467
9.46	4.92735
9.465	5.86224
9.47	6.93248
9.475	3.47316
9.48	12.7603
9.485	19.4814
9.49	19.6742
9.495	10.7043
9.5	6.95027
9.505	12.9185
9.51	3.11914
9.515	3.5354
9.52	16.2654
9.525	12.9907
9.53	10.2072
9.535	5.18019
9.54	2.58802
9.545	3.34299
9.55	10.43
9.555	1.26465
9.56	3.07346
9.565	6.90175
9.57	5.80082
9.575	-1.28439
9.58	-1.73775
9.585	-4.62788
9.59	-2.25282
9.595	5.90372
9.6	15.4023
9.605	14.1357
9.61	14.8044
9.615	5.53051
9.62	4.95468
9.625	-0.242899
9.63	13.9206
9.635	8.20072
9.64	-0.969887
9.645	7.06289
9.65	11.978
9.655	13.6219
9.66	10.5375
9.665	11.7652
9.67	5.59551
9.675	8.7184
9.68	5.13102
9.685	4.36219
9.69	7.88994
9.695	0.555249
9.7	11.3127
9.705	10.2856
9.71	9.4165
9.715	16.301
9.72	4.7802
9.725	17.2429
9.73	20.6915
9.735	14.3921
9.74	13.4205
9.745	13.2166
9.75	11.0273
9.755	13.6647
9.76	8.91686
9.765	7.61421
9.77	5.45553
9.775	0.554397
9.78	7.24016
9.785	-0.499415
9.79	7.06691
9.795	16.3584
9.8	18.2839
9.805	25.8827
9.81	13.2958
9.815	11.0926
9.82	17.4182
9.825	16.9441
9.83	17.2108
9.835	10.9993
9.84	3.59594
9.845	13.1871
9.85	16.9152
9.855	14.3315
9.86	10.3326
9.865	8.36137
9.87	12.3592
9.875	5.23606
9.88	1.35013
9.885	5.1361
9.89	11.0665
9.895	6.12466
9.9	11.653
9.905	5.7642
9.91	13.2538
9.915	14.4618
9.92	9.65453
9.925	8.29202
9.93	11.0023
9.935	5.76326
9.94	8.79797
9.945	6.35404
9.95	5.1618
9.955	-5.06616
9.96	4.33749
9.965	-0.293492
9.97	9.7495
9.975	15.4766
9.98	3.3477
9.985	15.0353
9.99	0.837362
[truncated: 45,170 more rows]

## Sheet: Fig5-figsupp2_AMPPNP_500uM
Trace_500uM.x	Trace_500uM.d
0	-1.31894
0.005	-0.471424
0.01	4.80111
0.015	0.58836
0.02	2.81415
0.025	4.06243
0.03	1.68546
0.035	1.66349
0.04	2.99407
0.045	6.42524
0.05	3.36785
0.055	3.87966
0.06	4.39422
0.065	-2.69346
0.07	-0.260385
0.075	1.12595
0.08	0.999696
0.085	2.76968
0.09	1.49871
0.095	2.60586
0.1	2.99787
0.105	4.73597
0.11	5.93725
0.115	2.39536
0.12	1.32074
0.125	1.8214
0.13	4.8768
0.135	2.01583
0.14	4.66342
0.145	1.83834
0.15	1.69577
0.155	-0.88523
0.16	2.10878
0.165	1.49666
0.17	0.368825
0.175	3.76988
0.18	5.66779
0.185	3.39694
0.19	4.6042
0.195	2.00616
0.2	-1.62719
0.205	3.72047
0.21	2.74698
0.215	-0.984367
0.22	0.451994
0.225	1.29687
0.23	-2.62411
0.235	-2.31787
0.24	-3.60314
0.245	1.17977
0.25	-2.60269
0.255	-0.148049
0.26	-3.26737
0.265	-4.36455
0.27	-2.97703
0.275	-7.81928
0.28	-6.14806
0.285	-2.55848
0.29	1.54589
0.295	-9.2787
0.3	-0.153927
0.305	-0.119045
0.31	2.8287
0.315	2.9111
0.32	2.59188
0.325	-0.214307
0.33	-0.254733
0.335	0.0187008
0.34	-0.127749
0.345	-0.424609
0.35	0.430422
0.355	1.2745
0.36	0.45024
0.365	3.32899
0.37	2.53189
0.375	-3.05571
0.38	-3.91776
0.385	2.21587
0.39	-0.0780688
0.395	-0.132189
0.4	-0.0628089
0.405	2.52905
0.41	3.43159
0.415	3.17809
0.42	5.51886
0.425	3.86624
0.43	1.81931
0.435	-3.70112
0.44	2.91278
0.445	-1.17648
0.45	-0.648067
0.455	-0.478112
0.46	3.66371
0.465	0.580573
0.47	-2.34606
0.475	-3.44061
0.48	1.58847
0.485	0.119579
0.49	2.34349
0.495	3.04942
0.5	-1.62112
0.505	-0.506938
0.51	-2.36341
0.515	-0.0786868
0.52	1.48668
0.525	-1.27303
0.53	0.700021
0.535	4.39817
0.54	3.18172
0.545	0.462943
0.55	3.25744
0.555	-0.344684
0.56	5.52516
0.565	3.08159
0.57	0.291061
0.575	-0.538248
0.58	-0.584581
0.585	-4.35295
0.59	-0.734927
0.595	-1.06181
0.6	-3.11398
0.605	2.51498
0.61	3.3462
0.615	-1.5429
0.62	-1.58908
0.625	5.44788
0.63	4.56553
0.635	3.12607
0.64	-3.0806
0.645	1.57484
0.65	7.11756
0.655	3.28402
0.66	3.64174
0.665	-1.33213
0.67	3.80912
0.675	5.48161
0.68	2.48695
0.685	5.7082
0.69	2.46454
0.695	1.15309
0.7	2.04582
0.705	1.51176
0.71	3.42871
0.715	3.92352
0.72	6.44489
0.725	5.6442
0.73	6.40475
0.735	4.75781
0.74	2.69843
0.745	4.81989
0.75	-2.0034
0.755	0.715209
0.76	-0.25536
0.765	4.90618
0.77	3.96555
0.775	0.361433
0.78	1.01042
0.785	3.66055
0.79	4.65907
0.795	2.5582
0.8	1.10607
0.805	-0.738601
0.81	-4.7388
0.815	-1.15859
0.82	3.12897
0.825	2.32125
0.83	-0.631216
0.835	-3.08087
0.84	-1.67057
0.845	3.62414
0.85	1.81514
0.855	-2.11102
0.86	4.14622
0.865	2.70778
0.87	1.89643
0.875	2.73111
0.88	3.86363
0.885	1.11713
0.89	0.321968
0.895	0.512095
0.9	-0.236763
0.905	-0.443366
0.91	9.26216
0.915	3.7852
0.92	1.01632
0.925	3.09014
0.93	-3.97398
0.935	-4.59603
0.94	-1.35926
0.945	-0.773789
0.95	0.982481
0.955	-4.33099
0.96	-0.673884
0.965	-3.06667
0.97	-3.14243
0.975	0.871164
0.98	0.2783
0.985	4.27977
0.99	3.2664
0.995	1.94
1	5.6265
1.005	4.64901
1.01	-1.56782
1.015	1.36343
1.02	3.85371
1.025	4.75136
1.03	4.63622
1.035	3.07255
1.04	4.24332
1.045	2.50852
1.05	0.262
1.055	0.209312
1.06	-0.810113
1.065	3.2006
1.07	1.17263
1.075	2.06862
1.08	-3.05029
1.085	-1.06196
1.09	5.88997
1.095	-1.33929
1.1	-1.41316
1.105	1.52823
1.11	4.05724
1.115	-5.79949
1.12	-2.88601
1.125	-5.7672
1.13	0.082628
1.135	0.60785
1.14	1.3428
1.145	2.6386
1.15	1.897
1.155	2.30601
1.16	4.39961
1.165	-0.277239
1.17	0.66359
1.175	0.765362
1.18	4.27081
1.185	-0.576195
1.19	1.24143
1.195	-2.2921
1.2	-0.333716
1.205	1.41999
1.21	6.85058
1.215	3.86204
1.22	5.77089
1.225	6.31259
1.23	3.40147
1.235	4.32717
1.24	4.49084
1.245	3.50711
1.25	4.40887
1.255	4.05895
1.26	4.61802
1.265	0.24407
1.27	5.35561
1.275	3.67981
1.28	8.66309
1.285	3.39912
1.29	0.942164
1.295	6.37371
1.3	5.8439
1.305	0.998934
1.31	4.11854
1.315	9.55288
1.32	12.7942
1.325	9.2081
1.33	7.55905
1.335	2.31567
1.34	6.14414
1.345	4.43827
1.35	5.16214
1.355	5.11644
1.36	4.94884
1.365	6.38787
1.37	2.55071
1.375	3.65694
1.38	6.22846
1.385	0.524016
1.39	4.27744
1.395	3.56951
1.4	2.33131
1.405	1.28781
1.41	1.55731
1.415	1.54664
1.42	2.53935
1.425	3.29573
1.43	6.79068
1.435	7.00107
1.44	7.12367
1.445	0.118215
1.45	0.613255
1.455	-1.72863
1.46	-0.36919
1.465	1.44333
1.47	-0.797489
1.475	2.0984
1.48	4.69744
1.485	1.3669
1.49	3.90504
1.495	3.43808
1.5	-0.138525
1.505	-4.35058
1.51	0.511976
1.515	-1.19077
1.52	1.54838
1.525	5.40579
1.53	4.48491
1.535	-1.69164
1.54	-0.889217
1.545	2.90218
1.55	3.17975
1.555	0.454893
1.56	2.24523
1.565	0.456704
1.57	2.62558
1.575	-1.6201
1.58	-0.495637
1.585	-0.173321
1.59	-1.33888
1.595	-3.25548
1.6	0.568191
1.605	-1.13343
1.61	1.13724
1.615	2.61128
1.62	6.00376
1.625	4.90629
1.63	6.62784
1.635	1.56768
1.64	-0.05548
1.645	6.11177
1.65	2.26054
1.655	6.32971
1.66	5.15174
1.665	5.25544
1.67	6.16327
1.675	5.62841
1.68	-1.42968
1.685	3.82846
1.69	5.459
1.695	2.495
1.7	5.27804
1.705	0.385699
1.71	2.84485
1.715	6.54567
1.72	0.494312
1.725	-0.345761
1.73	-3.053
1.735	-2.85041
1.74	-11.6974
1.745	-1.14648
1.75	-5.20342
1.755	-3.79519
1.76	-4.29559
1.765	-4.52746
1.77	2.97952
1.775	-0.016385
1.78	-0.911449
1.785	-6.88388
1.79	-5.46813
1.795	-0.456142
1.8	-4.11951
1.805	0.0951197
1.81	0.0711055
1.815	-1.68917
1.82	-2.13353
1.825	-2.02287
1.83	-2.92587
1.835	-0.692161
1.84	1.77517
1.845	-1.07628
1.85	4.02042
1.855	-4.82543
1.86	-0.770329
1.865	0.297879
1.87	1.64934
1.875	2.47745
1.88	1.22793
1.885	6.33053
1.89	4.63977
1.895	0.825436
1.9	1.52653
1.905	5.37894
1.91	3.2356
1.915	-0.45707
1.92	3.60992
1.925	7.67611
1.93	6.59168
1.935	-1.65395
1.94	-0.35407
1.945	-1.63062
1.95	-3.69071
1.955	0.361225
1.96	-4.26406
1.965	1.51028
1.97	-5.9762
1.975	-4.22558
1.98	-0.893128
1.985	-0.320611
1.99	-2.01764
1.995	-0.107157
2	-0.0418518
2.005	3.6363
2.01	1.8951
2.015	-2.07622
2.02	-6.076
2.025	-4.49479
2.03	-8.22952
2.035	-3.58888
2.04	-0.928418
2.045	-2.72554
2.05	-0.919375
2.055	2.78109
2.06	-3.17064
2.065	3.17681
2.07	2.00032
2.075	2.12861
2.08	-3.34203
2.085	-2.33556
2.09	-2.30045
2.095	-0.427588
2.1	-2.48266
2.105	-1.00718
2.11	1.1801
2.115	0.498629
2.12	3.72679
2.125	2.46013
2.13	3.02371
2.135	3.32616
2.14	-3.64662
2.145	6.03466
2.15	-3.71132
2.155	-0.052905
2.16	-0.17262
2.165	-2.11075
2.17	1.36447
2.175	0.474376
2.18	1.98281
2.185	-0.646432
2.19	0.765555
2.195	-4.80271
2.2	-1.26172
2.205	-4.08922
2.21	-2.94971
2.215	-4.51756
2.22	-0.500688
2.225	-4.43675
2.23	-1.86717
2.235	-1.7063
2.24	-3.80173
2.245	2.17039
2.25	1.81305
2.255	0.418183
2.26	4.9853
2.265	3.66715
2.27	-1.95984
2.275	-0.199911
2.28	-0.484471
2.285	6.26589
2.29	-1.11823
2.295	-4.39824
2.3	-1.91751
2.305	-4.19308
2.31	1.85321
2.315	-0.0583983
2.32	0.735463
2.325	1.60222
2.33	0.819436
2.335	1.69155
2.34	2.95976
2.345	-8.24252
2.35	-2.00949
2.355	-0.0351939
2.36	-3.06708
2.365	2.29859
2.37	6.14591
2.375	4.39314
2.38	2.70892
2.385	1.74823
2.39	1.22519
2.395	-1.38157
2.4	2.5714
2.405	6.28138
2.41	-4.88275
2.415	2.3257
2.42	1.47766
2.425	-0.675114
2.43	-2.66033
2.435	-6.64818
2.44	-5.61694
2.445	-5.58867
2.45	0.347161
2.455	-0.0802062
2.46	-1.40587
2.465	-2.21344
2.47	1.26507
2.475	1.01138
2.48	1.16772
2.485	-2.70332
2.49	0.766499
2.495	-1.34835
2.5	-0.903071
2.505	0.9866
2.51	0.493038
2.515	4.90207
2.52	1.29065
2.525	-2.63528
2.53	-1.295
2.535	2.05159
2.54	1.63716
2.545	3.88435
2.55	-0.13948
2.555	6.74501
2.56	0.0396319
2.565	-1.17565
2.57	5.74458
2.575	7.27964
2.58	-0.256416
2.585	2.43416
2.59	0.256213
2.595	1.2943
2.6	-0.298684
2.605	-1.69029
2.61	1.77295
2.615	0.691816
2.62	4.29833
2.625	0.600828
2.63	-3.91592
2.635	-3.14851
2.64	-1.26891
2.645	1.0763
2.65	1.09945
2.655	-1.63263
2.66	-7.47936
2.665	-11.0885
2.67	-6.96792
2.675	-3.21141
2.68	-1.43402
2.685	-1.2222
2.69	-6.17473
2.695	-2.49117
2.7	0.516597
2.705	0.821284
2.71	-1.91074
2.715	0.330543
2.72	-4.38697
2.725	-4.20153
2.73	0.697574
2.735	-0.761725
2.74	-3.48329
2.745	0.309599
2.75	-3.27133
2.755	-2.11604
2.76	-5.91864
2.765	-5.24962
2.77	-6.36293
2.775	-5.0813
2.78	-8.48942
2.785	-1.62635
2.79	-8.51155
2.795	-2.26525
2.8	-3.43024
2.805	-6.31268
2.81	2.25957
2.815	-0.61902
2.82	-3.33305
2.825	-1.11203
2.83	-3.89223
2.835	-0.936498
2.84	-7.1139
2.845	-4.0118
2.85	-4.70359
2.855	-2.19308
2.86	-4.14266
2.865	-8.31325
2.87	-2.58795
2.875	-0.827103
2.88	1.03283
2.885	3.66811
2.89	-1.33311
2.895	1.71095
2.9	-1.38893
2.905	-2.66821
2.91	1.27554
2.915	3.73165
2.92	0.842284
2.925	1.78695
2.93	5.16973
2.935	2.37316
2.94	-2.2432
2.945	5.69346
2.95	-1.7558
2.955	-0.354095
2.96	9.94911
2.965	2.663
2.97	8.67657
2.975	2.00713
2.98	4.57129
2.985	5.8565
2.99	4.07425
2.995	6.77453
3	0.376752
3.005	2.11675
3.01	1.30309
3.015	1.4021
3.02	2.51104
3.025	2.75467
3.03	5.81143
3.035	9.42355
3.04	7.39644
3.045	3.63986
3.05	3.29911
3.055	1.26277
3.06	2.9181
3.065	3.02175
3.07	0.867409
3.075	1.28527
3.08	4.70859
3.085	2.19075
3.09	7.54646
3.095	5.5648
3.1	2.24251
3.105	1.07751
3.11	3.33691
3.115	-0.927161
3.12	3.74037
3.125	1.16663
3.13	-0.386167
3.135	3.31413
3.14	2.95765
3.145	4.40232
3.15	7.55578
3.155	7.69707
3.16	4.16224
3.165	2.69053
3.17	1.75429
3.175	1.50151
3.18	-1.82461
3.185	6.30715
3.19	0.226789
3.195	-1.7217
3.2	-1.78575
3.205	2.47342
3.21	-0.00548274
3.215	-2.06001
3.22	-2.00191
3.225	-1.21401
3.23	-1.18968
3.235	3.10501
3.24	0.545976
3.245	0.24804
3.25	-0.658009
3.255	-1.45354
3.26	3.77592
3.265	0.449158
3.27	8.57175
3.275	5.85393
3.28	5.49784
3.285	1.47243
3.29	3.81313
3.295	-1.5772
3.3	-5.15694
3.305	1.78974
3.31	-1.47003
3.315	-0.225058
3.32	1.68873
3.325	-0.514651
3.33	2.89413
3.335	0.740585
3.34	1.46027
3.345	2.58572
3.35	-3.47657
3.355	0.052063
3.36	-4.55994
3.365	-1.50838
3.37	2.91445
3.375	3.48831
3.38	3.3311
3.385	2.90419
3.39	4.24667
3.395	2.5646
3.4	0.363785
3.405	2.28581
3.41	0.901393
3.415	-2.29014
3.42	-2.92228
3.425	-2.19693
3.43	-5.5752
3.435	-3.80306
3.44	-10.6096
3.445	-6.9133
3.45	-1.12579
3.455	1.66836
3.46	0.605096
3.465	-2.38323
3.47	2.98845
3.475	-1.15802
3.48	-2.10596
3.485	0.408597
3.49	3.37859
3.495	2.9942
3.5	-0.0500795
3.505	1.13232
3.51	-0.50553
3.515	2.12313
3.52	-1.59439
3.525	-2.65408
3.53	-2.71754
3.535	0.727903
3.54	7.17313
3.545	4.09086
3.55	4.10861
3.555	5.80666
3.56	3.05927
3.565	3.08002
3.57	4.27961
3.575	2.10109
3.58	5.02185
3.585	2.79223
3.59	2.32773
3.595	1.05003
3.6	3.25691
3.605	5.68252
3.61	5.63463
3.615	1.92144
3.62	8.84085
3.625	4.7495
3.63	1.93766
3.635	2.84886
3.64	-0.118077
3.645	5.66678
3.65	3.78938
3.655	2.74229
3.66	2.31184
3.665	8.70594
3.67	4.87993
3.675	5.08971
3.68	2.3408
3.685	1.16462
3.69	5.2634
3.695	0.522838
3.7	2.32611
3.705	-0.609226
3.71	5.80544
3.715	6.56364
3.72	1.59283
3.725	0.509379
3.73	1.29183
3.735	2.80943
3.74	1.18709
3.745	-2.01687
3.75	2.30478
3.755	3.34231
3.76	2.32671
3.765	6.70628
3.77	2.08599
3.775	1.84184
3.78	6.06837
3.785	8.55029
3.79	3.25344
3.795	4.08982
3.8	8.37843
3.805	7.10702
3.81	3.61244
3.815	2.69184
3.82	5.32193
3.825	2.45823
3.83	2.17746
3.835	4.11084
3.84	2.41966
3.845	3.66531
3.85	6.06487
3.855	-5.68433
3.86	-0.249325
3.865	0.657248
3.87	-4.40543
3.875	3.09894
3.88	-1.57238
3.885	0.118398
3.89	0.812092
3.895	5.74641
3.9	6.81321
3.905	1.20996
3.91	2.66326
3.915	4.09621
3.92	7.38164
3.925	1.51414
3.93	2.22791
3.935	-2.58383
3.94	-5.17818
3.945	2.9948
3.95	1.1935
3.955	7.71426
3.96	0.729423
3.965	5.9082
3.97	11.5955
3.975	6.91886
3.98	5.24328
3.985	3.45483
3.99	3.58858
3.995	12.3834
4	12.1686
4.005	9.43806
4.01	15.7716
4.015	16.0266
4.02	13.8938
4.025	9.05646
4.03	12.4236
4.035	14.0579
4.04	10.0046
4.045	11.6782
4.05	12.3157
4.055	15.4496
4.06	11.8345
4.065	10.271
4.07	10.4464
4.075	10.6854
4.08	14.0751
4.085	10.4389
4.09	12.3786
4.095	12.143
4.1	13.8124
4.105	15.0224
4.11	18.9147
4.115	17.5293
4.12	15.4099
4.125	17.7166
4.13	12.3504
4.135	13.8027
4.14	18.5517
4.145	20.3905
4.15	17.5311
4.155	18.0012
4.16	18.6209
4.165	17.4152
4.17	20.1042
4.175	18.6845
4.18	17.5533
4.185	12.5228
4.19	17.295
4.195	17.4589
4.2	16.628
4.205	14.7738
4.21	13.5838
4.215	5.26527
4.22	9.18026
4.225	13.6526
4.23	9.92066
4.235	14.3861
4.24	13.0895
4.245	17.9186
4.25	18.553
4.255	19.2494
4.26	16.6269
4.265	14.4357
4.27	16.0842
4.275	17.7948
4.28	14.3043
4.285	14.4373
4.29	19.4053
4.295	18.37
4.3	17.6965
4.305	20.6304
4.31	27.2636
4.315	21.4789
4.32	20.2004
4.325	17.026
4.33	25.3592
4.335	24.9705
4.34	27.2069
4.345	27.7971
4.35	21.5819
4.355	22.2811
4.36	16.9048
4.365	16.5503
4.37	15.2044
4.375	10.8827
4.38	12.4443
4.385	17.8444
4.39	10.7487
4.395	11.6205
4.4	10.9541
4.405	8.34793
4.41	7.2744
4.415	9.63426
4.42	12.3772
4.425	12.0101
4.43	14.497
4.435	15.5539
4.44	13.3882
4.445	16.1687
4.45	11.3118
4.455	16.9346
4.46	17.0139
4.465	24.1117
4.47	18.4018
4.475	21.1233
4.48	18.5772
4.485	24.9575
4.49	25.6982
4.495	23.1472
4.5	22.212
4.505	26.6982
4.51	25.1296
4.515	24.2783
4.52	20.6696
4.525	25.0366
4.53	22.1524
4.535	17.7131
4.54	13.1883
4.545	20.2813
4.55	20.5743
4.555	20.8825
4.56	24.1822
4.565	31.8577
4.57	28.3549
4.575	27.5027
4.58	29.3367
4.585	25.6349
4.59	18.4868
4.595	23.7284
4.6	23.5038
4.605	26.871
4.61	26.325
4.615	25.9851
4.62	25.7932
4.625	25.6831
4.63	31.4135
4.635	22.6846
4.64	21.8687
4.645	24.3973
4.65	20.5245
4.655	32.4226
4.66	26.45
4.665	32.2983
4.67	30.7029
4.675	28.5429
4.68	25.9525
4.685	30.9941
4.69	25.4844
4.695	23.8781
4.7	22.8733
4.705	20.3555
4.71	20.4799
4.715	19.8969
4.72	18.8921
4.725	17.0685
4.73	17.3317
4.735	12.0706
4.74	15.775
4.745	12.3119
4.75	12.0097
4.755	9.19035
4.76	11.9041
4.765	11.1654
4.77	11.3582
4.775	9.25392
4.78	13.7247
4.785	11.4382
4.79	12.1037
4.795	10.2673
4.8	13.1127
4.805	10.0621
4.81	10.6508
4.815	13.3652
4.82	15.0654
4.825	18.2988
4.83	12.4432
4.835	18.428
4.84	15.1885
4.845	15.3557
4.85	18.2233
4.855	14.4681
4.86	12.0969
4.865	16.8044
4.87	16.523
4.875	15.2307
4.88	16.2207
4.885	20.6538
4.89	15.7472
4.895	14.5131
4.9	18.1751
4.905	14.2025
4.91	15.2852
4.915	11.8781
4.92	13.9494
4.925	18.8931
4.93	19.7731
4.935	16.2024
4.94	15.894
4.945	17.5582
4.95	18.0521
4.955	18.3729
4.96	12.3557
4.965	9.46964
4.97	2.58024
4.975	5.44455
4.98	8.48723
4.985	9.4353
4.99	10.1858
4.995	7.7243
5	9.79798
5.005	10.6862
5.01	7.68896
5.015	5.89855
5.02	5.4339
5.025	7.18299
5.03	1.30179
5.035	9.39113
5.04	14.0509
5.045	11.966
5.05	10.3238
5.055	13.8917
5.06	10.8395
5.065	10.2933
5.07	10.7841
5.075	16.8086
5.08	19.8657
5.085	15.9911
5.09	16.0966
5.095	14.4757
5.1	17.4128
5.105	12.2163
5.11	11.6342
5.115	15.03
5.12	16.5679
5.125	18.6183
5.13	20.3406
5.135	17.1325
5.14	22.9067
5.145	18.8604
5.15	18.037
5.155	16.4319
5.16	15.202
5.165	18.7123
5.17	21.1613
5.175	20.7578
5.18	18.521
5.185	13.1105
5.19	21.2655
5.195	22.7927
5.2	19.0609
5.205	23.7882
5.21	31.1091
5.215	20.4161
5.22	17.7853
5.225	24.8493
5.23	29.0232
5.235	23.5834
5.24	23.6016
5.245	24.4817
5.25	20.5985
5.255	17.6598
5.26	19.7826
5.265	21.0691
5.27	24.5835
5.275	32.9517
5.28	22.6645
5.285	24.4589
5.29	25.5135
5.295	22.7306
5.3	25.2265
5.305	27.5612
5.31	23.3803
5.315	28.9772
5.32	27.1875
5.325	27.8301
5.33	31.7482
5.335	28.7574
5.34	32.1534
5.345	31.9914
5.35	26.9496
5.355	22.9108
5.36	25.451
5.365	27.0864
5.37	28.6144
5.375	33.2038
5.38	35.3209
5.385	28.9556
5.39	29.171
5.395	30.8148
5.4	31.9424
5.405	26.1216
5.41	22.1064
5.415	28.2411
5.42	29.4254
5.425	29.4744
5.43	25.7283
5.435	26.6278
5.44	34.5347
5.445	35.0507
5.45	35.0667
5.455	32.4821
5.46	36.4918
5.465	33.8535
5.47	32.841
5.475	34.5518
5.48	33.4986
5.485	26.4325
5.49	30.0558
5.495	29.7147
5.5	33.9613
5.505	32.2403
5.51	34.6681
5.515	35.9651
5.52	35.9755
5.525	30.8966
5.53	33.0506
5.535	35.3995
5.54	35.495
5.545	39.6829
5.55	37.2611
5.555	40.3573
5.56	37.1689
5.565	38.2655
5.57	40.0916
5.575	31.8943
5.58	39.719
5.585	41.0822
5.59	42.5476
5.595	46.824
5.6	44.6847
5.605	45.5849
5.61	47.1617
5.615	44.167
5.62	39.617
5.625	42.0753
5.63	41.3882
5.635	43.2805
5.64	46.7086
5.645	43.5833
5.65	45.6527
5.655	46.2113
5.66	41.1698
5.665	40.7855
5.67	49.5817
5.675	43.0845
5.68	35.9386
5.685	38.6508
5.69	39.768
5.695	36.7162
5.7	44.1212
5.705	41.5654
5.71	40.8532
5.715	45.111
5.72	48.7358
5.725	49.0708
5.73	46.0558
5.735	53.2116
5.74	50.4935
5.745	49.1359
5.75	54.4387
5.755	40.9189
5.76	46.3515
5.765	40.9452
5.77	47.4438
5.775	50.6796
5.78	46.8915
5.785	43.2107
5.79	44.8396
5.795	47.753
5.8	52.2607
5.805	51.0407
5.81	55.2148
5.815	53.9639
5.82	52.5912
5.825	55.4249
5.83	58.7403
5.835	65.5843
5.84	55.8731
5.845	63.2406
5.85	63.1014
5.855	58.9004
5.86	54.3487
5.865	57.0026
5.87	57.229
5.875	53.7413
5.88	56.5026
5.885	57.4447
5.89	57.498
5.895	62.67
5.9	65.9184
5.905	62.1914
5.91	57.3965
5.915	62.3317
5.92	57.7063
5.925	58.2175
5.93	57.714
5.935	65.5814
5.94	68.5304
5.945	68.3638
5.95	64.5631
5.955	63.259
5.96	57.2991
5.965	57.3221
5.97	60.1118
5.975	58.4082
5.98	61.4631
5.985	70.2162
5.99	65.7548
5.995	66.6402
6	62.9217
6.005	67.4609
6.01	60.528
6.015	61.2961
6.02	68.4164
6.025	62.7995
6.03	63.7407
6.035	72.4962
6.04	65.9291
6.045	66.2592
6.05	66.3393
6.055	60.0751
6.06	62.6939
6.065	60.8667
6.07	66.7753
6.075	66.8507
6.08	60.0876
6.085	57.9903
6.09	65.2285
6.095	66.7364
6.1	63.511
6.105	63.9846
6.11	64.0444
6.115	62.5198
6.12	63.9728
6.125	67.5256
6.13	64.8722
6.135	68.7732
6.14	63.071
6.145	59.8192
6.15	67.2966
6.155	72.2746
6.16	63.1072
6.165	62.6477
6.17	66.2963
6.175	64.5593
6.18	63.7434
6.185	68.8223
6.19	74.4596
6.195	68.9605
6.2	72.5787
6.205	69.496
6.21	71.3602
6.215	74.4208
6.22	69.8948
6.225	68.2398
6.23	70.2006
6.235	71.3649
6.24	72.9176
6.245	72.3708
6.25	77.8448
6.255	71.857
6.26	67.4996
6.265	78.6319
6.27	73.2946
6.275	72.5784
6.28	73.9261
6.285	78.5318
6.29	75.2831
6.295	81.7423
6.3	77.6867
6.305	77.3958
6.31	80.9403
6.315	76.0538
6.32	75.3472
6.325	75.8835
6.33	82.6242
6.335	81.4552
6.34	79.4864
6.345	72.9353
6.35	82.2093
6.355	77.2702
6.36	74.8151
6.365	70.5245
6.37	74.5964
6.375	72.8798
6.38	78.1445
6.385	80.7527
6.39	78.2596
6.395	80.4465
6.4	89.4915
6.405	81.6071
6.41	79.7983
6.415	82.2989
6.42	90.9872
6.425	88.8663
6.43	89.3623
6.435	87.5178
6.44	97.0549
6.445	91.4307
6.45	96.0908
6.455	91.519
6.46	91.7397
6.465	100.298
6.47	94.9315
6.475	95.332
6.48	93.3565
6.485	96.419
6.49	98.8576
6.495	97.1137
6.5	96.5544
6.505	97.9381
6.51	87.5256
6.515	93.8027
6.52	98.6425
6.525	96.9384
6.53	95.2914
6.535	97.0776
6.54	99.5415
6.545	105.175
6.55	101.96
6.555	97.2888
6.56	98.4202
6.565	105.467
6.57	104.001
6.575	101.262
6.58	102.34
6.585	99.2198
6.59	103.234
6.595	102.256
6.6	99.1545
6.605	110.507
6.61	101.324
6.615	95.0851
6.62	103.747
6.625	101.141
6.63	101.523
6.635	100.828
6.64	101.212
6.645	104.947
6.65	95.4184
6.655	101.707
6.66	102.141
6.665	104.535
6.67	98.7641
6.675	102.624
6.68	106.949
6.685	101.356
6.69	100.869
6.695	97.858
6.7	101.399
6.705	105.664
6.71	102.895
6.715	103.802
6.72	99.879
6.725	107.982
6.73	98.0945
6.735	100.366
6.74	101.467
6.745	105.238
6.75	98.5051
6.755	103.562
6.76	100.497
6.765	111.832
6.77	110.77
6.775	104.901
6.78	103.782
6.785	107.612
6.79	106.257
6.795	106.31
6.8	106.441
6.805	109.709
6.81	104.541
6.815	104.424
6.82	104.717
6.825	107.818
6.83	108.49
6.835	111.226
6.84	109.943
6.845	107.965
6.85	107.083
6.855	112.806
6.86	114.813
6.865	112.452
6.87	108.759
6.875	107.052
6.88	112.982
6.885	117.662
6.89	107.685
6.895	112.877
6.9	108.93
6.905	115.013
6.91	106.766
6.915	114.187
6.92	115.146
6.925	114.27
6.93	114.381
6.935	112.507
6.94	114.968
6.945	109.766
6.95	114.299
6.955	112.528
6.96	115.155
6.965	111.113
6.97	107.012
6.975	113.707
6.98	115.611
6.985	115.357
6.99	114.85
6.995	111.789
7	113.126
7.005	112.188
7.01	113.571
7.015	112.561
7.02	116.221
7.025	120.413
7.03	123.577
7.035	118.017
7.04	121.96
7.045	118.377
7.05	119.837
7.055	123.796
7.06	124.216
7.065	118.238
7.07	118.761
7.075	117.437
7.08	120.766
7.085	120.536
7.09	121.356
7.095	123.924
7.1	121.038
7.105	122.874
7.11	120.398
7.115	119.412
7.12	122.585
7.125	115.837
7.13	118.338
7.135	122.513
7.14	123.857
7.145	118.175
7.15	118.265
7.155	119.024
7.16	118.467
7.165	128.227
7.17	126.2
7.175	124.789
7.18	119.537
7.185	117.633
7.19	115.861
7.195	118.702
7.2	125.521
7.205	117.648
7.21	117.05
7.215	117.029
7.22	122.435
7.225	129.96
7.23	122.06
7.235	120.594
7.24	121.968
7.245	119.424
7.25	130.711
7.255	131.872
7.26	130.671
7.265	121.561
7.27	126.898
7.275	127.578
7.28	125.412
7.285	119.851
7.29	121.118
7.295	127.463
7.3	128.444
7.305	128.351
7.31	131.615
7.315	128.764
7.32	136.857
7.325	135.87
7.33	130.139
7.335	122.133
7.34	123.313
7.345	133.988
7.35	131.314
7.355	136.555
7.36	134.368
7.365	130.613
7.37	135.705
7.375	132.81
7.38	134.809
7.385	139.596
7.39	139.399
7.395	137.955
7.4	130.128
7.405	138.879
7.41	138.312
7.415	139.528
7.42	146.104
7.425	147.384
7.43	134.14
7.435	144.174
7.44	142.808
7.445	139.169
7.45	139.073
7.455	136.574
7.46	136.587
7.465	133.066
7.47	140.44
7.475	134.856
7.48	140.324
7.485	137.319
7.49	141.689
7.495	143.794
7.5	142.357
7.505	136.904
7.51	137.319
7.515	138.944
7.52	134.86
7.525	140.122
7.53	143.401
7.535	142.636
7.54	139.756
7.545	132.735
7.55	142.293
7.555	146.086
7.56	139.796
7.565	139.913
7.57	146.513
7.575	143.087
7.58	140.979
7.585	139.849
7.59	142.946
7.595	148.089
7.6	131.989
7.605	136.508
7.61	129.68
7.615	133.913
7.62	128.846
7.625	125.418
7.63	126.61
7.635	134.602
7.64	131.186
7.645	124.601
7.65	123.606
7.655	128.76
7.66	137.947
7.665	134.849
7.67	131.169
7.675	129.474
7.68	133.096
7.685	133.917
7.69	139.946
7.695	138.616
7.7	134.577
7.705	132.756
7.71	138.506
7.715	133.568
7.72	129.745
7.725	136.02
7.73	130.759
7.735	128.298
7.74	134.975
7.745	136.704
7.75	138.789
7.755	141.015
7.76	140.935
7.765	142.718
7.77	137.415
7.775	137.832
7.78	130.167
7.785	126.728
7.79	131.619
7.795	127.95
7.8	115.123
7.805	121.919
7.81	125.828
7.815	121.692
7.82	115.479
7.825	123.413
7.83	124.721
7.835	129.58
7.84	134.225
7.845	123.129
7.85	119.839
7.855	127.7
7.86	120.804
7.865	125.417
7.87	123.854
7.875	120.63
7.88	127.509
7.885	127.086
7.89	129.766
7.895	137.763
7.9	139.979
7.905	139.72
7.91	131.52
7.915	140.017
7.92	125.995
7.925	132.268
7.93	134.252
7.935	143.481
7.94	135.032
7.945	139.136
7.95	134.378
7.955	136.15
7.96	131.091
7.965	134.494
7.97	146.041
7.975	138.828
7.98	138.57
7.985	129.527
7.99	133.774
7.995	131.373
8	135.624
8.005	138.304
8.01	139.855
8.015	144.424
8.02	145.128
8.025	138.414
8.03	140.21
8.035	142.943
8.04	137.529
8.045	137.819
8.05	142.004
8.055	136.95
8.06	142.518
8.065	138.693
8.07	142.154
8.075	146.677
8.08	156.62
8.085	152.045
8.09	145.608
8.095	146.636
8.1	145.612
8.105	148.793
8.11	137.446
8.115	142.046
8.12	142.518
8.125	140.276
8.13	144.56
8.135	147.28
8.14	146.095
8.145	144.582
8.15	148.094
8.155	149.383
8.16	153.29
8.165	153.735
8.17	147.834
8.175	153.602
8.18	154.084
8.185	148.378
8.19	158.75
8.195	145.724
8.2	152.699
8.205	159.768
8.21	158.545
8.215	149.978
8.22	160.359
8.225	153.156
8.23	149.283
8.235	154.13
8.24	161.292
8.245	162.841
8.25	164.533
8.255	161.599
8.26	152.5
8.265	148.475
8.27	149.216
8.275	161.133
8.28	157.483
8.285	159.312
8.29	161.384
8.295	163.064
8.3	157.174
8.305	164.422
8.31	161.996
8.315	170.073
8.32	166.008
8.325	161.594
8.33	158.614
8.335	160.349
8.34	157.745
8.345	169.196
8.35	164.704
8.355	161.418
8.36	153.465
8.365	157.805
8.37	160.214
8.375	160.748
8.38	166.462
8.385	167.484
8.39	170.01
8.395	171.428
8.4	167.219
8.405	172.414
8.41	164.213
8.415	172.09
8.42	165.621
8.425	167.691
8.43	171.015
8.435	165.846
8.44	162.467
8.445	171.272
8.45	176.042
8.455	174.069
8.46	175.481
8.465	172.442
8.47	168.519
8.475	172.065
8.48	176.205
8.485	165.656
8.49	171.813
8.495	169.773
8.5	166.032
8.505	169.831
8.51	172.709
8.515	168.037
8.52	159.666
8.525	166.821
8.53	170.829
8.535	165.037
8.54	155
8.545	164.188
8.55	163.285
8.555	159.83
8.56	153.423
8.565	159.761
8.57	163.676
8.575	171.803
8.58	164.48
8.585	167.626
8.59	166.031
8.595	162.685
8.6	153.276
8.605	166.115
8.61	170.252
8.615	176.95
8.62	167.927
8.625	178.745
8.63	171.347
8.635	172.695
8.64	176.37
8.645	173.969
8.65	164.864
8.655	173.309
8.66	169.723
8.665	176.923
8.67	171.335
8.675	171.141
8.68	176.529
8.685	173.07
8.69	176.134
8.695	172.383
8.7	176.784
8.705	174.734
8.71	181.04
8.715	179.489
8.72	175.094
8.725	167.555
8.73	164.619
8.735	163.596
8.74	174.017
8.745	172.957
8.75	170.108
8.755	175.408
8.76	172.411
8.765	169.877
8.77	165.836
8.775	168.151
8.78	172.715
8.785	164.038
8.79	168.051
8.795	172.331
8.8	170.498
8.805	161.995
8.81	178.633
8.815	171.314
8.82	170.633
8.825	173.48
8.83	176.18
8.835	167.968
8.84	180.918
8.845	177.429
8.85	181.045
8.855	178.87
8.86	171.845
8.865	170.015
8.87	166.834
8.875	176.083
8.88	179.93
8.885	183.385
8.89	173.753
8.895	174.282
8.9	174.08
8.905	175.734
8.91	178.171
8.915	172.916
8.92	172.049
8.925	171.761
8.93	170.316
8.935	178.238
8.94	169.881
8.945	173.827
8.95	181.402
8.955	179.978
8.96	181.252
8.965	177.428
8.97	181.589
8.975	175.794
8.98	173.09
8.985	175.295
8.99	175.257
8.995	167.664
9	171.596
9.005	176.117
9.01	176.184
9.015	178.434
9.02	177.121
9.025	166.117
9.03	166.97
9.035	172.771
9.04	169.542
9.045	170.628
9.05	165.562
9.055	170.024
9.06	166.666
9.065	172.04
9.07	171.829
9.075	175.768
9.08	173.82
9.085	174.646
9.09	175.452
9.095	167.436
9.1	173.211
9.105	176.785
9.11	175.488
9.115	174.632
9.12	179.344
9.125	180.021
9.13	176.143
9.135	175.143
9.14	172.168
9.145	174.311
9.15	170.981
9.155	172.611
9.16	177.079
9.165	168.539
9.17	177.281
9.175	178.29
9.18	175.394
9.185	171.118
9.19	175.672
9.195	179.597
9.2	178.745
9.205	178.331
9.21	177.792
9.215	180.793
9.22	180.909
9.225	182.081
9.23	177.332
9.235	183.789
9.24	178.979
9.245	171.827
9.25	175.49
9.255	177.752
9.26	173.944
9.265	167.454
9.27	171.96
9.275	173.404
9.28	169.12
9.285	170.788
9.29	172.999
9.295	172.023
9.3	169.263
9.305	163.637
9.31	164.14
9.315	171.675
9.32	178.155
9.325	180.27
9.33	181.196
9.335	185.917
9.34	180.717
9.345	170.573
9.35	178.595
9.355	185.857
9.36	174.912
9.365	180.271
9.37	178.043
9.375	186.699
9.38	179.468
9.385	182.406
9.39	176.292
9.395	185.22
9.4	186.684
9.405	179.648
9.41	180.568
9.415	182.316
9.42	188.222
9.425	181.572
9.43	183.457
9.435	188.024
9.44	185.348
9.445	185.403
9.45	187.517
9.455	186.307
9.46	186.722
9.465	187.141
9.47	186.676
9.475	186.853
9.48	184.141
9.485	186.652
9.49	182.596
9.495	192.721
9.5	189.02
9.505	183.91
9.51	190.145
9.515	178.477
9.52	181.286
9.525	178.488
9.53	191.857
9.535	192.043
9.54	184.08
9.545	191.316
9.55	189.653
9.555	189.919
9.56	183.428
9.565	189.961
9.57	187.406
9.575	189.203
9.58	195.474
9.585	188.34
9.59	183.7
9.595	181.389
9.6	180.207
9.605	184.514
9.61	186.653
9.615	183.7
9.62	190.527
9.625	186.816
9.63	184.676
9.635	188.883
9.64	187.33
9.645	184.197
9.65	193.12
9.655	182.848
9.66	182.986
9.665	187.744
9.67	189.268
9.675	178.072
9.68	177.945
9.685	170.03
9.69	182.129
9.695	182.417
9.7	182.264
9.705	187.925
9.71	190.571
9.715	190.726
9.72	187.651
9.725	189.193
9.73	187.489
9.735	183.038
9.74	182.604
9.745	185.849
9.75	177.736
9.755	181.883
9.76	183.765
9.765	182.864
9.77	184.341
9.775	190.058
9.78	188.629
9.785	187.039
9.79	189.269
9.795	192.133
9.8	182.675
9.805	181.987
9.81	181.486
9.815	185.591
9.82	189.81
9.825	189.713
9.83	188.533
9.835	184.341
9.84	192.334
9.845	192.395
9.85	190.24
9.855	184.467
9.86	185.837
9.865	189.037
9.87	195.372
9.875	191.982
9.88	188.131
9.885	200.732
9.89	195.655
9.895	185.02
9.9	198.751
9.905	193.802
9.91	193.596
9.915	187.636
9.92	186.083
9.925	195.732
9.93	197.018
9.935	196.67
9.94	194.717
9.945	196.248
9.95	193.894
9.955	195.467
9.96	195.236
9.965	195.582
9.97	199.767
9.975	196.952
9.98	198.013
9.985	199.045
9.99	200.602
[truncated: 24,665 more rows]

## Sheet: Fig5-figsupp2_ATPrS_100uM
Trace_ATPrS_100uM.x	Trace_ATPrS_100uM.d
0	-1.732
0.005	-1.95056
0.01	-4.90717
0.015	-3.2617
0.02	-4.55145
0.025	0.501144
0.03	0.233943
0.035	-1.77795
0.04	-0.462745
0.045	-1.64415
0.05	1.78301
0.055	-0.370364
0.06	-0.937009
0.065	-1.55361
0.07	2.41544
0.075	2.15589
0.08	-2.18897
0.085	-3.67473
0.09	1.62585
0.095	0.545301
0.1	3.33368
0.105	5.25792
0.11	1.03915
0.115	-0.61653
0.12	-0.470792
0.125	-0.314286
0.13	-0.763163
0.135	3.45061
0.14	2.14445
0.145	4.15334
0.15	3.11247
0.155	2.91782
0.16	1.36968
0.165	0.0564217
0.17	0.87414
0.175	2.86165
0.18	1.59186
0.185	-1.74908
0.19	1.66998
0.195	-4.36605
0.2	-2.59346
0.205	-1.47925
0.21	-3.56604
0.215	-0.0537177
0.22	-4.98086
0.225	0.0455505
0.23	4.28027
0.235	1.63442
0.24	-6.11573
0.245	-0.0321925
0.25	-1.85185
0.255	-2.17868
0.26	-2.1444
0.265	-4.23535
0.27	2.45177
0.275	-4.30585
0.28	0.0968419
0.285	-3.52979
0.29	-0.628574
0.295	-2.82195
0.3	-1.91604
0.305	0.0650652
0.31	-2.77655
0.315	-3.80885
0.32	-7.16235
0.325	-3.34418
0.33	-2.3315
0.335	-2.18481
0.34	-1.18869
0.345	1.58218
0.35	0.444459
0.355	-1.91025
0.36	1.32047
0.365	-1.39804
0.37	-0.507046
0.375	-5.38588
0.38	-3.72755
0.385	-5.22355
0.39	-4.60187
0.395	-3.98211
0.4	-1.87782
0.405	-3.353
0.41	-3.65257
0.415	-4.19421
0.42	0.67266
0.425	-2.85053
0.43	0.999175
0.435	-6.10937
0.44	-4.41671
0.445	2.5128
0.45	1.644
0.455	5.47947
0.46	5.20775
0.465	-0.94242
0.47	2.02002
0.475	0.992855
0.48	2.71738
0.485	-1.69263
0.49	-0.249794
0.495	4.80783
0.5	-1.69166
0.505	-4.9677
0.51	2.93266
0.515	-0.163806
0.52	-0.625848
0.525	1.46522
0.53	5.8853
0.535	-2.45469
0.54	2.40786
0.545	3.92492
0.55	9.0572
0.555	1.0455
0.56	2.01166
0.565	-5.80701
0.57	4.1688
0.575	-3.85751
0.58	-0.0725949
0.585	2.26728
0.59	-1.93509
0.595	-0.473516
0.6	3.91846
0.605	-2.0594
0.61	-0.8581
0.615	4.35211
0.62	0.608847
0.625	7.33558
0.63	-0.142634
0.635	2.34257
0.64	5.6455
0.645	6.60441
0.65	3.00127
0.655	3.4345
0.66	2.56809
0.665	-0.659761
0.67	-2.03596
0.675	1.27336
0.68	-1.63408
0.685	0.719741
0.69	-1.38858
0.695	-4.1247
0.7	0.125314
0.705	-0.713283
0.71	-4.59112
0.715	-2.74877
0.72	-1.90379
0.725	-0.939555
0.73	-1.79728
0.735	1.39077
0.74	1.73892
0.745	4.09208
0.75	5.52684
0.755	2.99323
0.76	-1.86216
0.765	1.75181
0.77	1.45874
0.775	-0.241934
0.78	8.84805
0.785	7.44687
0.79	4.91224
0.795	6.14913
0.8	4.48775
0.805	1.99331
0.81	4.71565
0.815	3.4943
0.82	4.95254
0.825	7.52758
0.83	-0.752437
0.835	3.43393
0.84	4.62679
0.845	4.35905
0.85	3.51176
0.855	4.15026
0.86	4.4185
0.865	2.69638
0.87	3.32041
0.875	-0.178921
0.88	-1.75446
0.885	5.71714
0.89	0.806474
0.895	0.113067
0.9	7.669
0.905	4.9182
0.91	4.41562
0.915	-2.65049
0.92	-4.82155
0.925	-10.3645
0.93	-2.38225
0.935	-8.13936
0.94	-6.79583
0.945	-2.33577
0.95	-6.46876
0.955	-4.39119
0.96	-5.98462
0.965	-2.81979
0.97	-1.21466
0.975	1.6186
0.98	2.99483
0.985	0.380728
0.99	1.01081
0.995	-1.11107
1	2.35103
1.005	2.45256
1.01	4.2567
1.015	0.930326
1.02	-1.5137
1.025	1.34202
1.03	1.99828
1.035	0.300175
1.04	-3.44119
1.045	1.38118
1.05	1.17493
1.055	-1.89472
1.06	-4.96666
1.065	4.63708
1.07	2.24864
1.075	0.977496
1.08	-2.06379
1.085	1.45276
1.09	-3.1413
1.095	-5.67272
1.1	-4.74247
1.105	-1.7563
1.11	-8.2639
1.115	1.5119
1.12	5.56304
1.125	3.44543
1.13	-3.45225
1.135	-5.34344
1.14	0.539192
1.145	1.67443
1.15	0.376169
1.155	-0.930125
1.16	-6.3724
1.165	-2.35948
1.17	-3.91965
1.175	-2.01636
1.18	0.38724
1.185	1.51787
1.19	2.1208
1.195	0.889039
1.2	1.61253
1.205	-4.42379
1.21	-2.48173
1.215	-3.39531
1.22	-4.28162
1.225	1.03283
1.23	0.717274
1.235	-2.43317
1.24	1.40433
1.245	0.369881
1.25	0.507134
1.255	-0.882379
1.26	-3.75899
1.265	-3.53365
1.27	-2.12903
1.275	-4.94732
1.28	-1.98373
1.285	0.0786691
1.29	-5.3128
1.295	0.336557
1.3	-7.77868
1.305	-1.92436
1.31	-5.21431
1.315	-6.1873
1.32	-6.25366
1.325	-2.1417
1.33	0.217719
1.335	-0.0580174
1.34	-2.88398
1.345	1.04538
1.35	2.82742
1.355	2.76913
1.36	2.41468
1.365	-0.14222
1.37	-1.94081
1.375	-1.47342
1.38	-1.31867
1.385	-3.57597
1.39	-0.620664
1.395	2.4778
1.4	-0.964007
1.405	-1.57766
1.41	-0.0286007
1.415	-0.689318
1.42	-3.58398
1.425	0.715488
1.43	-6.93423
1.435	-1.39022
1.44	-1.67705
1.445	-1.0771
1.45	1.11506
1.455	-3.64183
1.46	-3.0957
1.465	1.21375
1.47	-4.17165
1.475	0.669859
1.48	1.26955
1.485	-4.07848
1.49	-0.22217
1.495	-1.2107
1.5	-3.10008
1.505	-4.60171
1.51	-4.02111
1.515	-4.04613
1.52	4.42609
1.525	3.33833
1.53	4.44906
1.535	-0.0462027
1.54	-2.64972
1.545	0.440415
1.55	1.57514
1.555	-1.91798
1.56	1.09805
1.565	-1.8684
1.57	-3.53489
1.575	4.95878
1.58	-0.555599
1.585	-0.813939
1.59	-6.82356
1.595	-3.09774
1.6	-2.37691
1.605	-3.62104
1.61	-5.93857
1.615	-4.00971
1.62	-5.65863
1.625	0.313166
1.63	1.33953
1.635	-5.90365
1.64	2.00564
1.645	-0.453464
1.65	-0.977634
1.655	-2.28301
1.66	-4.27092
1.665	2.10015
1.67	2.87193
1.675	-1.6797
1.68	-1.53648
1.685	-1.08103
1.69	-2.64572
1.695	-5.6485
1.7	-0.677006
1.705	-2.19577
1.71	-3.6243
1.715	-3.37022
1.72	-0.539987
1.725	-2.59673
1.73	1.10359
1.735	0.743985
1.74	-5.09361
1.745	-2.55075
1.75	-3.38756
1.755	-1.32733
1.76	-2.22171
1.765	0.69539
1.77	-2.64725
1.775	-7.07475
1.78	-3.31071
1.785	-3.5917
1.79	-4.44511
1.795	-3.00238
1.8	-1.2329
1.805	0.325068
1.81	-6.9034
1.815	-7.66762
1.82	-2.22873
1.825	-2.98299
1.83	-4.39661
1.835	-3.38972
1.84	0.533598
1.845	2.14341
1.85	-3.76553
1.855	-0.792834
1.86	-4.05895
1.865	-8.05523
1.87	-4.58351
1.875	-2.27486
1.88	-4.69532
1.885	-1.7299
1.89	-5.30815
1.895	-1.65755
1.9	-3.12609
1.905	-0.329656
1.91	-6.12425
1.915	-2.53965
1.92	-3.20886
1.925	-0.235477
1.93	0.465581
1.935	-1.01109
1.94	-1.28357
1.945	1.12276
1.95	1.24302
1.955	1.22159
1.96	0.260724
1.965	-1.82391
1.97	-0.818021
1.975	0.0266313
1.98	-0.789734
1.985	0.531525
1.99	-2.10929
1.995	4.72464
2	2.1283
2.005	-3.9038
2.01	-2.40336
2.015	-2.3894
2.02	1.13956
2.025	-2.75309
2.03	-8.93545
2.035	-8.37752
2.04	-7.91661
2.045	-5.57162
2.05	3.06917
2.055	-1.47282
2.06	-1.68426
2.065	-4.73378
2.07	-3.96572
2.075	-1.57251
2.08	-0.673775
2.085	-3.47447
2.09	-4.8627
2.095	-3.78862
2.1	-0.0388045
2.105	-4.22512
2.11	-6.09899
2.115	-0.492126
2.12	3.06282
2.125	2.93996
2.13	-1.25231
2.135	-3.11407
2.14	-0.750652
2.145	3.62232
2.15	-2.67334
2.155	0.0809136
2.16	0.100618
2.165	-1.00731
2.17	-1.02171
2.175	-0.632932
2.18	0.753583
2.185	-1.60565
2.19	-1.627
2.195	-2.80968
2.2	1.50753
2.205	-1.80861
2.21	-0.453602
2.215	0.14811
2.22	2.13626
2.225	-3.74241
2.23	2.32191
2.235	4.65449
2.24	-0.449609
2.245	3.51953
2.25	-0.328111
2.255	0.732113
2.26	1.21129
2.265	2.76008
2.27	1.17931
2.275	5.80607
2.28	-2.13234
2.285	2.37763
2.29	3.60237
2.295	5.77969
2.3	3.65166
2.305	1.06218
2.31	1.924
2.315	4.1467
2.32	1.75203
2.325	4.49551
2.33	0.830099
2.335	0.492234
2.34	0.860302
2.345	2.73391
2.35	4.88198
2.355	7.15069
2.36	0.404166
2.365	4.13772
2.37	-1.25424
2.375	2.6294
2.38	2.64266
2.385	-0.264654
2.39	1.63957
2.395	3.29736
2.4	5.87088
2.405	10.99
2.41	7.50469
2.415	3.02411
2.42	8.33146
2.425	2.17668
2.43	2.36486
2.435	-2.08474
2.44	-0.316624
2.445	2.30367
2.45	1.13847
2.455	9.02193
2.46	2.8265
2.465	2.90934
2.47	4.50392
2.475	5.07537
2.48	7.5287
2.485	0.36475
2.49	1.37261
2.495	-3.2979
2.5	-2.93478
2.505	0.275286
2.51	-0.180022
2.515	-0.744141
2.52	-0.50087
2.525	-1.5013
2.53	-1.31639
2.535	1.79363
2.54	-2.77754
2.545	-4.06098
2.55	-3.42983
2.555	-0.601053
2.56	5.64674
2.565	2.69355
2.57	-0.915518
2.575	-0.971738
2.58	-0.706682
2.585	-6.99725
2.59	-3.9718
2.595	-4.29775
2.6	-0.49956
2.605	0.563422
2.61	-2.25513
2.615	2.28709
2.62	1.84035
2.625	1.82925
2.63	-3.02304
2.635	0.766069
2.64	3.08183
2.645	2.23267
2.65	-1.63268
2.655	-0.610423
2.66	1.9103
2.665	-2.84924
2.67	-2.55275
2.675	3.72445
2.68	1.8173
2.685	-1.73557
2.69	0.594472
2.695	-1.4466
2.7	-1.2408
2.705	-0.269698
2.71	-3.06763
2.715	-1.8146
2.72	-3.85532
2.725	-0.000712151
2.73	-0.670849
2.735	0.152103
2.74	0.353659
2.745	2.8353
2.75	3.66394
2.755	1.03488
2.76	5.46569
2.765	2.99437
2.77	2.17533
2.775	5.86579
2.78	2.07293
2.785	0.718774
2.79	1.76201
2.795	2.9608
2.8	1.84229
2.805	4.55591
2.81	-3.82477
2.815	-4.42302
2.82	0.342304
2.825	-5.54722
2.83	-1.8065
2.835	1.40669
2.84	3.37863
2.845	-0.588088
2.85	0.1316
2.855	0.092884
2.86	0.126445
2.865	3.48129
2.87	-0.272828
2.875	0.844744
2.88	-2.78862
2.885	1.78628
2.89	0.786031
2.895	2.34879
2.9	4.82387
2.905	5.38341
2.91	-2.05379
2.915	-1.72455
2.92	-2.94969
2.925	0.215568
2.93	0.917034
2.935	0.0856408
2.94	1.791
2.945	0.487482
2.95	5.9019
2.955	-0.631751
2.96	-0.176677
2.965	0.630553
2.97	3.24881
2.975	0.188624
2.98	1.464
2.985	2.06907
2.99	1.43766
2.995	3.00561
3	0.575281
3.005	-0.973357
3.01	-2.32335
3.015	-4.90531
3.02	1.73289
3.025	0.322442
3.03	5.0982
3.035	1.24718
3.04	1.23975
3.045	1.47247
3.05	1.87637
3.055	2.72189
3.06	2.72615
3.065	-2.2627
3.07	2.58744
3.075	-3.02139
3.08	1.44246
3.085	1.60569
3.09	0.188274
3.095	-1.7509
3.1	-4.33326
3.105	2.48802
3.11	-1.41719
3.115	0.431627
3.12	-0.668345
3.125	-0.710611
3.13	-2.05989
3.135	-0.176693
3.14	-1.67943
3.145	-2.16247
3.15	-3.8549
3.155	-1.42701
3.16	-0.83544
3.165	0.217619
3.17	-0.423702
3.175	4.75203
3.18	4.70445
3.185	-0.1854
3.19	1.17665
3.195	0.931476
3.2	-5.58601
3.205	-3.46192
3.21	0.693027
3.215	2.91138
3.22	-2.57319
3.225	-2.12091
3.23	0.878802
3.235	-3.51828
3.24	-4.89681
3.245	-3.75266
3.25	-1.29539
3.255	1.27565
3.26	2.47198
3.265	3.03499
3.27	3.41004
3.275	0.326555
3.28	-1.2866
3.285	7.31872
3.29	6.95666
3.295	4.50162
3.3	2.82522
3.305	8.10223
3.31	0.396963
3.315	3.56832
3.32	3.41995
3.325	6.20603
3.33	0.978338
3.335	3.57467
3.34	1.71091
3.345	7.48989
3.35	3.24253
3.355	3.41198
3.36	1.03657
3.365	-1.97735
3.37	-1.48384
3.375	4.48338
3.38	2.96281
3.385	-0.0357488
3.39	-2.70441
3.395	0.521558
3.4	-0.0720472
3.405	3.58729
3.41	5.51835
3.415	0.439932
3.42	-2.12556
3.425	-2.09171
3.43	3.45366
3.435	1.01609
3.44	3.48117
3.445	2.51281
3.45	4.2248
3.455	3.10668
3.46	2.97991
3.465	4.86256
3.47	3.52871
3.475	-0.08266
3.48	1.27664
3.485	6.84696
3.49	-0.323421
3.495	3.88078
3.5	0.881207
3.505	0.0284129
3.51	3.58799
3.515	-1.15214
3.52	0.967165
3.525	-2.75741
3.53	-1.98084
3.535	2.21036
3.54	-0.831117
3.545	3.99853
3.55	-2.05601
3.555	-0.218414
3.56	6.88573
3.565	0.755634
3.57	-0.75618
3.575	2.41306
3.58	0.197547
3.585	-0.987302
3.59	1.93818
3.595	3.33396
3.6	1.35999
3.605	-2.88083
3.61	-4.08052
3.615	-5.83939
3.62	-0.345022
3.625	1.7748
3.63	2.48296
3.635	-0.862995
3.64	2.53869
3.645	0.10048
3.65	-0.442508
3.655	0.969254
3.66	-2.58905
3.665	-1.50547
3.67	3.97335
3.675	2.92061
3.68	-7.2366
3.685	-6.85784
3.69	-7.06139
3.695	-4.2246
3.7	-0.0121452
3.705	-4.76488
3.71	5.47046
3.715	-2.42742
3.72	-0.820731
3.725	-0.963857
3.73	2.81089
3.735	0.184911
3.74	1.45909
3.745	4.83673
3.75	7.19147
3.755	7.80451
3.76	1.86766
3.765	4.50624
3.77	3.4508
3.775	-0.642228
3.78	-3.00322
3.785	-2.90191
3.79	-5.67974
3.795	1.33475
3.8	0.64185
3.805	5.86896
3.81	2.56874
3.815	1.4431
3.82	6.31226
3.825	8.66081
3.83	6.01883
3.835	7.93739
3.84	3.49212
3.845	0.204168
3.85	-3.07851
3.855	-4.95332
3.86	-3.81187
3.865	2.43409
3.87	-0.555363
3.875	2.99778
3.88	0.0475824
3.885	-5.62929
3.89	-3.37175
3.895	-0.899278
3.9	-3.98932
3.905	-3.59107
3.91	-4.20076
3.915	-5.95836
3.92	3.67234
3.925	2.82809
3.93	-0.474645
3.935	-0.679053
3.94	-6.42325
3.945	-7.52021
3.95	1.06362
3.955	2.91187
3.96	1.67594
3.965	1.01497
3.97	8.17598
3.975	2.10163
3.98	1.52624
3.985	0.649452
3.99	3.35968
3.995	2.02937
4	1.54189
4.005	3.67319
4.01	2.68865
4.015	0.143767
4.02	4.27312
4.025	-4.34517
4.03	-4.13053
4.035	2.74081
4.04	6.47385
4.045	1.46662
4.05	1.9152
4.055	-0.412064
4.06	-1.37555
4.065	1.24841
4.07	0.298954
4.075	-1.3716
4.08	-0.475645
4.085	-2.10927
4.09	-0.277361
4.095	-3.43373
4.1	-1.80068
4.105	2.91961
4.11	0.218328
4.115	-2.56507
4.12	3.31876
4.125	4.16852
4.13	4.98261
4.135	0.597639
4.14	-1.12029
4.145	2.31918
4.15	3.17443
4.155	2.12633
4.16	0.913857
4.165	4.54511
4.17	2.61601
4.175	-0.495706
4.18	3.53928
4.185	1.16016
4.19	7.27373
4.195	4.36217
4.2	1.04221
4.205	3.49775
4.21	6.33044
4.215	2.05519
4.22	-4.61565
4.225	-0.653817
4.23	-3.31476
4.235	-3.00056
4.24	-0.148008
4.245	-0.455453
4.25	-4.53729
4.255	0.363728
4.26	0.0254078
4.265	0.139007
4.27	0.98084
4.275	-1.25516
4.28	2.82327
4.285	0.519694
4.29	-2.52701
4.295	-0.185366
4.3	2.7903
4.305	4.15418
4.31	-0.211426
4.315	-1.06452
4.32	-1.51808
4.325	4.23102
4.33	3.84009
4.335	-2.93989
4.34	1.20174
4.345	1.37579
4.35	0.389426
4.355	-3.2124
4.36	-5.19353
4.365	6.72572
4.37	-1.75879
4.375	-4.45681
4.38	2.13801
4.385	-2.94961
4.39	-3.37956
4.395	-2.68195
4.4	-3.68029
4.405	-2.4136
4.41	-1.5959
4.415	-4.2242
4.42	-1.53582
4.425	-0.144454
4.43	-1.67814
4.435	-1.01877
4.44	-1.11091
4.445	2.30275
4.45	-1.18116
4.455	0.0323097
4.46	3.08755
4.465	0.931209
4.47	1.95835
4.475	-2.9759
4.48	-1.33561
4.485	-2.89538
4.49	-6.28384
4.495	-3.02887
4.5	-0.94111
4.505	-1.90518
4.51	-3.40642
4.515	-1.76161
4.52	-1.89719
4.525	-3.88277
4.53	-1.20107
4.535	1.55061
4.54	1.4063
4.545	-1.27401
4.55	-2.85486
4.555	-1.66671
4.56	1.09659
4.565	-3.27197
4.57	2.33972
4.575	1.27274
4.58	-2.45374
4.585	3.71417
4.59	-3.58301
4.595	-7.37117
4.6	-3.12409
4.605	-4.95024
4.61	0.0429305
4.615	-2.3425
4.62	1.85657
4.625	-6.48374
4.63	3.65028
4.635	-3.69731
4.64	-1.95523
4.645	0.297237
4.65	-2.02277
4.655	4.18149
4.66	-2.33273
4.665	4.2058
4.67	-1.37007
4.675	3.59765
4.68	-0.369113
4.685	-3.43551
4.69	-2.00253
4.695	-0.580226
4.7	-4.36893
4.705	0.969744
4.71	-0.202161
4.715	1.48759
4.72	-3.66697
4.725	-0.3806
4.73	-2.7896
4.735	-10.0676
4.74	-1.70146
4.745	-3.73647
4.75	-1.18075
4.755	-6.36795
4.76	-3.51139
4.765	-3.34481
4.77	-1.94959
4.775	0.341548
4.78	-1.59081
4.785	3.64454
4.79	2.15757
4.795	-0.924534
4.8	-1.11315
4.805	1.06014
4.81	-3.29529
4.815	-3.44839
4.82	-3.46102
4.825	-4.07855
4.83	2.80056
4.835	-0.190494
4.84	0.664339
4.845	4.06306
4.85	-0.961128
4.855	-3.65324
4.86	-8.0971
4.865	-7.31043
4.87	-4.38204
4.875	0.646973
4.88	-3.42328
4.885	-3.63408
4.89	-0.527308
4.895	4.88603
4.9	-1.25122
4.905	-1.82096
4.91	3.10258
4.915	3.21801
4.92	2.61484
4.925	1.56621
4.93	0.958742
4.935	1.01806
4.94	-0.041293
4.945	0.861083
4.95	0.142885
4.955	1.87471
4.96	4.98326
4.965	7.25822
4.97	3.70729
4.975	-1.35249
4.98	0.743248
4.985	0.732938
4.99	-1.69382
4.995	-0.828143
5	-3.0975
5.005	-2.81367
5.01	-1.55998
5.015	-1.98738
5.02	-0.164563
5.025	1.04988
5.03	-1.97961
5.035	-1.04773
5.04	0.0139909
5.045	-0.170788
5.05	-2.10494
5.055	-0.651692
5.06	-0.523887
5.065	-3.55341
5.07	0.681119
5.075	-2.28167
5.08	-3.81644
5.085	0.390568
5.09	2.758
5.095	1.9322
5.1	4.15572
5.105	1.65805
5.11	-0.331924
5.115	4.72764
5.12	4.40914
5.125	5.72899
5.13	0.0461031
5.135	-2.41207
5.14	-0.958459
5.145	1.60064
5.15	-0.319192
5.155	-0.660645
5.16	-2.23195
5.165	1.53013
5.17	-1.70094
5.175	-1.58065
5.18	1.164
5.185	-2.49557
5.19	-0.717489
5.195	-6.79186
5.2	-6.92831
5.205	-4.43129
5.21	-5.77105
5.215	-3.64117
5.22	-1.92293
5.225	0.00336607
5.23	2.07199
5.235	5.27565
5.24	1.27433
5.245	-3.52829
5.25	-1.59676
5.255	1.62297
5.26	0.385446
5.265	3.11467
5.27	1.49185
5.275	2.70483
5.28	4.52696
5.285	-1.33656
5.29	2.49424
5.295	-1.57588
5.3	-3.66061
5.305	3.62431
5.31	-0.528487
5.315	3.77884
5.32	-1.99748
5.325	-0.304835
5.33	-2.89822
5.335	-9.31993
5.34	-4.16925
5.345	-1.6059
5.35	-2.51164
5.355	-1.52358
5.36	-0.363513
5.365	-3.82015
5.37	-0.337442
5.375	-0.0882063
5.38	0.928357
5.385	-1.51675
5.39	-0.508668
5.395	-2.48619
5.4	1.59378
5.405	-4.68716
5.41	-0.00802491
5.415	-4.3669
5.42	-1.5906
5.425	1.214
5.43	-7.16087
5.435	-3.24781
5.44	2.17971
5.445	-2.80293
5.45	-2.83894
5.455	-5.06871
5.46	0.897427
5.465	-0.397432
5.47	4.66609
5.475	-1.28123
5.48	0.867499
5.485	-0.325819
5.49	1.40782
5.495	-1.33178
5.5	2.15567
5.505	2.91043
5.51	1.15676
5.515	1.54126
5.52	4.09073
5.525	-0.869075
5.53	-0.432239
5.535	7.74375
5.54	4.13438
5.545	4.21178
5.55	4.94094
5.555	9.1258
5.56	7.26125
5.565	6.4211
5.57	0.132269
5.575	2.46106
5.58	2.13175
5.585	3.52058
5.59	3.05392
5.595	3.80074
5.6	1.34387
5.605	3.58243
5.61	2.63102
5.615	-1.59367
5.62	-4.17253
5.625	-4.00829
5.63	2.0955
5.635	0.742657
5.64	2.82578
5.645	-3.86898
5.65	-2.23187
5.655	-1.6541
5.66	-0.919185
5.665	-2.362
5.67	-3.80313
5.675	-2.79612
5.68	-5.43623
5.685	0.829834
5.69	3.74207
5.695	0.837389
5.7	-2.34888
5.705	-6.11233
5.71	0.545812
5.715	-6.65751
5.72	-3.7774
5.725	-0.98437
5.73	-4.94285
5.735	-5.76705
5.74	-2.91861
5.745	-2.34429
5.75	1.6975
5.755	0.317877
5.76	-5.87095
5.765	-7.52664
5.77	-4.58526
5.775	2.12505
5.78	1.31218
5.785	-3.19282
5.79	-4.62936
5.795	-2.10091
5.8	5.54196
5.805	4.1935
5.81	0.633353
5.815	6.22052
5.82	0.136538
5.825	0.619175
5.83	4.06521
5.835	1.15768
5.84	0.498788
5.845	-2.22369
5.85	4.05407
5.855	-0.753168
5.86	-2.00918
5.865	0.177354
5.87	1.70918
5.875	4.83406
5.88	2.87307
5.885	2.9857
5.89	1.61182
5.895	4.18661
5.9	2.18623
5.905	-0.741734
5.91	-2.82382
5.915	-6.58711
5.92	2.53098
5.925	-2.45007
5.93	-0.204082
5.935	-2.69749
5.94	-3.31029
5.945	-5.78458
5.95	3.9069
5.955	-4.40122
5.96	4.02923
5.965	0.493654
5.97	0.687715
5.975	-0.000573616
5.98	-0.828021
5.985	-1.12952
5.99	-1.27813
5.995	-2.8129
6	-3.56302
6.005	-1.66496
6.01	-4.62962
6.015	-1.2097
6.02	-5.27287
6.025	-3.90662
6.03	0.31102
6.035	-4.00052
6.04	-4.63245
6.045	-0.997671
6.05	-6.25652
6.055	-1.05482
6.06	-1.37077
6.065	-6.37081
6.07	-1.6429
6.075	-4.84214
6.08	-6.26357
6.085	-1.29458
6.09	-2.27332
6.095	-0.547281
6.1	-1.11809
6.105	3.04267
6.11	-1.06254
6.115	2.07844
6.12	-1.5187
6.125	-6.26777
6.13	2.2439
6.135	-1.10877
6.14	-1.06861
6.145	0.700917
6.15	-4.9384
6.155	-2.38833
6.16	0.397608
6.165	-2.03519
6.17	-3.32852
6.175	-3.17693
6.18	3.93576
6.185	-0.330471
6.19	0.00274851
6.195	2.50464
6.2	0.845582
6.205	-4.91797
6.21	-3.72149
6.215	-1.49458
6.22	-2.01243
6.225	-3.97623
6.23	-6.43794
6.235	-2.2733
6.24	-4.0252
6.245	-0.741719
6.25	-2.12818
6.255	-0.143845
6.26	-4.65386
6.265	-6.34403
6.27	-4.86644
6.275	-6.37721
6.28	-4.40195
6.285	-5.29257
6.29	-6.89034
6.295	-2.08106
6.3	-6.44065
6.305	0.202238
6.31	-2.50302
6.315	1.45384
6.32	-2.85195
6.325	-2.24313
6.33	-4.79592
6.335	-0.82871
6.34	-2.03706
6.345	0.447575
6.35	2.05121
6.355	0.845607
6.36	-0.0153218
6.365	-3.49079
6.37	0.39694
6.375	-6.01486
6.38	-3.20319
6.385	1.55372
6.39	-4.49127
6.395	-3.63246
6.4	-4.13442
6.405	-6.50797
6.41	-0.928464
6.415	-1.13293
6.42	-1.45196
6.425	0.832822
6.43	4.41528
6.435	0.186511
6.44	-0.0579461
6.445	1.75314
6.45	-2.46803
6.455	-1.59752
6.46	-2.02519
6.465	1.27378
6.47	4.35032
6.475	1.76274
6.48	-2.4433
6.485	1.86291
6.49	-3.71482
6.495	0.880342
6.5	-0.464171
6.505	-3.4665
6.51	2.84801
6.515	0.781034
6.52	-0.312057
6.525	-5.2815
6.53	-0.595877
6.535	0.467612
6.54	-1.28407
6.545	2.26109
6.55	2.75013
6.555	-0.319884
6.56	-2.02974
6.565	-1.01392
6.57	-1.29079
6.575	0.750049
6.58	-7.24194
6.585	-7.77057
6.59	-2.13978
6.595	1.37486
6.6	2.09848
6.605	-2.6992
6.61	-1.9154
6.615	1.89139
6.62	-4.57538
6.625	-4.84306
6.63	-0.00751416
6.635	-0.250239
6.64	0.569156
6.645	1.31924
6.65	-2.97536
6.655	-2.53621
6.66	0.98677
6.665	0.739094
6.67	1.60158
6.675	0.431666
6.68	-1.46544
6.685	1.4455
6.69	1.23457
6.695	5.00687
6.7	7.61895
6.705	7.38191
6.71	4.84074
6.715	6.92077
6.72	6.00438
6.725	2.77981
6.73	0.754217
6.735	-3.24662
6.74	-1.26029
6.745	3.65691
6.75	-2.88411
6.755	6.84201
6.76	1.70568
6.765	-0.127711
6.77	1.65729
6.775	0.703826
6.78	-1.94057
6.785	-0.203443
6.79	1.92352
6.795	1.28822
6.8	-3.3677
6.805	-0.969458
6.81	1.61911
6.815	-0.00671365
6.82	-1.55758
6.825	-0.00303471
6.83	-0.721712
6.835	-1.40305
6.84	-2.64052
6.845	-1.90176
6.85	-1.89007
6.855	-0.2948
6.86	2.47076
6.865	-1.90972
6.87	-2.48253
6.875	2.33325
6.88	4.07511
6.885	5.21299
6.89	-1.13619
6.895	-0.283343
6.9	-1.79244
6.905	2.21841
6.91	-2.16897
6.915	-0.962272
6.92	-8.476
6.925	-1.46058
6.93	-2.27355
6.935	-0.959884
6.94	2.11449
6.945	-3.0565
6.95	1.04296
6.955	2.30629
6.96	2.30469
6.965	-3.41213
6.97	1.52802
6.975	-2.54212
6.98	-2.07591
6.985	1.8129
6.99	-0.509571
6.995	-4.21754
7	-3.62218
7.005	-3.88341
7.01	1.30737
7.015	0.307873
7.02	-5.16087
7.025	-5.63414
7.03	-7.14381
7.035	-3.54786
7.04	0.417996
7.045	-0.683545
7.05	-4.81442
7.055	4.21147
7.06	3.75482
7.065	-0.106385
7.07	1.00077
7.075	2.33989
7.08	-0.0526887
7.085	-0.437321
7.09	-7.41669
7.095	0.92476
7.1	-2.56172
7.105	1.55661
7.11	3.02533
7.115	-0.396294
7.12	-1.46982
7.125	-0.295669
7.13	1.49274
7.135	-0.776502
7.14	-1.08763
7.145	2.58755
7.15	0.0346122
7.155	2.90521
7.16	2.73928
7.165	-1.17512
7.17	-0.816481
7.175	2.076
7.18	1.99111
7.185	-2.50324
7.19	0.833152
7.195	2.20337
7.2	-2.94047
7.205	1.58103
7.21	0.217876
7.215	3.96667
7.22	-0.917271
7.225	4.61374
7.23	5.50861
7.235	5.68567
7.24	-1.07851
7.245	1.78088
7.25	-4.03095
7.255	-3.96038
7.26	1.04167
7.265	2.77071
7.27	2.09449
7.275	1.6049
7.28	2.47184
7.285	2.87981
7.29	6.49335
7.295	4.05071
7.3	5.40836
7.305	3.97747
7.31	7.30989
7.315	2.53238
7.32	3.00617
7.325	1.07713
7.33	-0.125483
7.335	1.41717
7.34	2.16918
7.345	0.403582
7.35	-2.15316
7.355	1.83947
7.36	-2.30855
7.365	-2.0925
7.37	-1.76634
7.375	1.99173
7.38	2.12421
7.385	2.0327
7.39	-2.79408
7.395	-1.80112
7.4	-1.7856
7.405	1.02635
7.41	1.28639
7.415	4.28593
7.42	5.11243
7.425	1.42176
7.43	-2.8376
7.435	-2.65107
7.44	0.565704
7.445	4.42526
7.45	-2.99246
7.455	-1.79553
7.46	-2.38802
7.465	-2.49236
7.47	5.25494
7.475	6.62391
7.48	9.50918
7.485	6.54106
7.49	4.51334
7.495	2.80884
7.5	1.44417
7.505	-1.5167
7.51	0.751434
7.515	3.43197
7.52	-0.611128
7.525	-0.957798
7.53	2.74673
7.535	-0.266118
7.54	3.45232
7.545	2.14548
7.55	-3.44573
7.555	1.13511
7.56	0.337575
7.565	-2.81427
7.57	-1.87672
7.575	-1.05011
7.58	-4.18302
7.585	0.691272
7.59	-1.36997
7.595	-1.11372
7.6	-2.68107
7.605	-3.32549
7.61	-0.398783
7.615	2.19237
7.62	-5.97978
7.625	0.41918
7.63	-2.68677
7.635	-5.26712
7.64	0.933857
7.645	-2.10013
7.65	2.2621
7.655	4.93233
7.66	-1.95727
7.665	2.73372
7.67	-5.36922
7.675	-3.01181
7.68	-1.20057
7.685	-5.87014
7.69	4.68272
7.695	3.00956
7.7	0.0854216
7.705	-0.271768
7.71	0.770496
7.715	1.58643
7.72	1.84226
7.725	0.784611
7.73	2.28813
7.735	0.498447
7.74	-2.52272
7.745	1.41951
7.75	-1.0841
7.755	-2.85346
7.76	0.277882
7.765	0.350118
7.77	4.58273
7.775	2.71939
7.78	0.731228
7.785	-0.150989
7.79	1.08852
7.795	-4.07455
7.8	-0.67544
7.805	1.52823
7.81	2.42843
7.815	2.86073
7.82	3.4584
7.825	-5.83389
7.83	-0.501981
7.835	6.46174
7.84	-1.06441
7.845	0.731263
7.85	2.14695
7.855	0.408685
7.86	0.130497
7.865	2.72084
7.87	0.64834
7.875	3.73743
7.88	-0.186333
7.885	1.93789
7.89	-0.0449782
7.895	-1.29832
7.9	-2.05449
7.905	0.289249
7.91	-2.2812
7.915	-2.45046
7.92	3.50128
7.925	0.741331
7.93	0.330988
7.935	-4.1897
7.94	-3.75834
7.945	1.93154
7.95	2.79029
7.955	2.48484
7.96	0.40842
7.965	-4.40829
7.97	-3.97314
7.975	2.94748
7.98	-4.73829
7.985	1.4611
7.99	-2.09549
7.995	-3.82491
8	-2.38705
8.005	-9.45387
8.01	-6.33719
8.015	-3.14549
8.02	-1.28677
8.025	4.61865
8.03	-0.86719
8.035	-6.09069
8.04	-1.60463
8.045	-2.75059
8.05	-5.80772
8.055	-2.1165
8.06	-0.0915609
8.065	-0.638933
8.07	0.509899
8.075	-2.54649
8.08	2.90832
8.085	1.30626
8.09	-2.05731
8.095	0.545068
8.1	4.58462
8.105	1.21793
8.11	-2.28184
8.115	0.10036
8.12	-2.27906
8.125	-2.7694
8.13	4.48643
8.135	1.39145
8.14	0.238631
8.145	3.53516
8.15	-1.39274
8.155	-3.07085
8.16	-0.539133
8.165	-1.44479
8.17	4.20871
8.175	-2.19583
8.18	2.41312
8.185	0.914231
8.19	-0.646655
8.195	-2.2463
8.2	-1.41487
8.205	-2.73112
8.21	-0.198161
8.215	3.78436
8.22	4.30664
8.225	-0.259954
8.23	-2.12556
8.235	-0.89246
8.24	1.17106
8.245	-3.1816
8.25	3.19372
8.255	1.63023
8.26	3.91527
8.265	4.80578
8.27	1.50046
8.275	1.66403
8.28	0.127388
8.285	-1.96007
8.29	1.85477
8.295	6.26312
8.3	1.41817
8.305	4.5374
8.31	-3.53127
8.315	5.42716
8.32	4.7032
8.325	1.03187
8.33	0.731799
8.335	2.86907
8.34	0.89856
8.345	0.269429
8.35	0.730133
8.355	1.94002
8.36	2.47838
8.365	2.32818
8.37	5.57686
8.375	6.29191
8.38	-1.48231
8.385	0.574471
8.39	1.45252
8.395	2.09614
8.4	6.01005
8.405	7.53285
8.41	3.48511
8.415	4.43392
8.42	-2.17884
8.425	-6.3805
8.43	-1.17231
8.435	-2.85656
8.44	-2.10566
8.445	-0.966868
8.45	3.26364
8.455	1.87457
8.46	5.24773
8.465	-2.56851
8.47	-2.30061
8.475	2.12894
8.48	1.79676
8.485	-1.24624
8.49	-0.973724
8.495	1.47211
8.5	2.02299
8.505	3.26816
8.51	4.01052
8.515	8.45326
8.52	5.50494
8.525	-1.30481
8.53	-0.150781
8.535	0.801018
8.54	2.07943
8.545	4.26572
8.55	0.0074849
8.555	0.938493
8.56	-3.29526
8.565	-3.00527
8.57	-4.00269
8.575	2.30221
8.58	-1.52765
8.585	-1.99603
8.59	4.33526
8.595	1.3
8.6	0.823636
8.605	2.85681
8.61	1.69553
8.615	-3.01059
8.62	3.72506
8.625	5.64099
8.63	3.22556
8.635	1.74714
8.64	1.96309
8.645	-1.17839
8.65	0.0649934
8.655	1.39726
8.66	1.51165
8.665	-2.18202
8.67	3.76576
8.675	-2.61608
8.68	4.03944
8.685	3.38151
8.69	2.97588
8.695	-0.334318
8.7	3.82396
8.705	4.17033
8.71	7.46628
8.715	5.1421
8.72	6.36365
8.725	4.56833
8.73	2.06131
8.735	-3.17245
8.74	-0.219354
8.745	1.51198
8.75	5.86746
8.755	0.220977
8.76	5.56328
8.765	0.559845
8.77	4.80894
8.775	5.43748
8.78	4.71243
8.785	3.74862
8.79	6.71486
8.795	7.44816
8.8	5.24505
8.805	-0.92868
8.81	4.12994
8.815	3.4236
8.82	5.77823
8.825	4.61081
8.83	5.86141
8.835	2.8203
8.84	2.88656
8.845	-1.65095
8.85	0.284465
8.855	3.63462
8.86	1.25363
8.865	3.83863
8.87	3.78888
8.875	2.24058
8.88	-2.16394
8.885	-3.47468
8.89	5.28626
8.895	2.42606
8.9	8.31833
8.905	3.78173
8.91	-2.77187
8.915	1.28376
8.92	1.21315
8.925	6.07806
8.93	2.07606
8.935	-2.45335
8.94	-0.43414
8.945	5.08125
8.95	3.15898
8.955	1.10024
8.96	4.64539
8.965	-0.214273
8.97	1.1192
8.975	2.73486
8.98	0.926053
8.985	-0.610901
8.99	1.904
8.995	3.10071
9	-4.90623
9.005	-0.191548
9.01	5.11227
9.015	-2.3469
9.02	-0.996486
9.025	-4.26068
9.03	-0.338412
9.035	-1.84358
9.04	2.97404
9.045	-1.20478
9.05	7.33407
9.055	2.90025
9.06	-0.191323
9.065	2.2468
9.07	-0.00659069
9.075	6.64213
9.08	2.80133
9.085	3.66081
9.09	2.00868
9.095	1.53513
9.1	-0.530551
9.105	2.47649
9.11	-0.854121
9.115	-0.12653
9.12	1.67419
9.125	3.06785
9.13	4.11975
9.135	1.63636
9.14	-5.52049
9.145	-1.68154
9.15	6.12464
9.155	1.58583
9.16	0.708904
9.165	2.03929
9.17	-1.44249
9.175	1.45006
9.18	9.01914
9.185	1.61795
9.19	-1.31259
9.195	-0.325398
9.2	1.33447
9.205	-0.903069
9.21	1.3151
9.215	8.42417
9.22	3.76328
9.225	4.03396
9.23	-3.05989
9.235	-6.00854
9.24	1.03418
9.245	0.305886
9.25	0.0266436
9.255	4.69874
9.26	8.06441
9.265	7.82936
9.27	4.51201
9.275	4.75119
9.28	1.54055
9.285	0.948856
9.29	6.54777
9.295	2.82926
9.3	3.49709
9.305	-0.38251
9.31	-1.86952
9.315	1.41678
9.32	-2.03751
9.325	-1.19089
9.33	-5.02101
9.335	-0.603424
9.34	-1.33848
9.345	0.950498
9.35	-2.2386
9.355	-0.644176
9.36	-0.349098
9.365	-4.28356
9.37	4.17239
9.375	-0.420232
9.38	-0.169294
9.385	-0.72343
9.39	1.14037
9.395	3.01468
9.4	3.04189
9.405	-1.40572
9.41	-0.0168639
9.415	-1.34561
9.42	2.49736
9.425	-1.13752
9.43	1.80428
9.435	3.94205
9.44	1.39659
9.445	4.43903
9.45	-0.347424
9.455	3.89101
9.46	2.47227
9.465	1.69686
9.47	-1.00514
9.475	1.26039
9.48	0.926809
9.485	2.53331
9.49	4.73749
9.495	-3.07887
9.5	-0.430645
9.505	-1.3467
9.51	-3.04291
9.515	-1.08141
9.52	7.5578
9.525	-0.18304
9.53	4.75489
9.535	6.2134
9.54	8.30569
9.545	7.52431
9.55	0.162231
9.555	3.03153
9.56	3.85474
9.565	4.57069
9.57	-1.21782
9.575	1.22756
9.58	0.0579085
9.585	1.06827
9.59	-3.04355
9.595	0.352094
9.6	-0.758174
9.605	2.55604
9.61	1.981
9.615	3.7604
9.62	1.74832
9.625	4.58327
9.63	-1.34577
9.635	-4.60709
9.64	1.01025
9.645	1.50088
9.65	-0.0457886
9.655	-1.5438
9.66	-3.30176
9.665	-0.412511
9.67	0.488379
9.675	-7.38313
9.68	-8.52535
9.685	-4.28406
9.69	1.59772
9.695	6.99087
9.7	3.66416
9.705	4.0522
9.71	4.94988
9.715	-0.946393
9.72	2.19472
9.725	0.613921
9.73	4.15582
9.735	6.12641
9.74	0.413665
9.745	-0.672533
9.75	-3.90977
9.755	-5.28188
9.76	-7.68568
9.765	-5.98579
9.77	-4.78289
9.775	-0.381602
9.78	3.49116
9.785	2.29504
9.79	0.864514
9.795	3.55751
9.8	1.59077
9.805	2.54591
9.81	-4.05044
9.815	-3.52023
9.82	-8.1768
9.825	-4.15692
9.83	0.103621
9.835	-1.15789
9.84	-3.89451
9.845	-4.68859
9.85	-0.171261
9.855	-0.982165
9.86	0.333476
9.865	-0.499222
9.87	-5.79289
9.875	3.08206
9.88	-0.900941
9.885	-1.16658
9.89	0.706166
9.895	-3.61219
9.9	-1.73426
9.905	-5.87893
9.91	-1.73992
9.915	-2.48393
9.92	-2.2649
9.925	3.36031
9.93	3.54726
9.935	1.96496
9.94	2.4704
9.945	4.59195
9.95	-0.677007
9.955	0.388774
9.96	0.362722
9.965	1.63851
9.97	-3.5005
9.975	0.382228
9.98	-5.57866
9.985	-2.19526
9.99	1.43768
[truncated: 24,438 more rows]

[truncated: 3 more sheets: Fig5-figsupp2_ATPrS_500uM, Fig5-figsupp3, Fig5-figsupp4]
